# Supplementary material for: Genome-wide base editor screen identifies regulators of protein abundance in yeast
Source: bioRxiv preprint, doi:10.1101/2022.03.09.483657, version 1 (2022-03-09)
Supplement: Supplemental Table 1 [file 483657_file03.xlsx]

## Sheet: Sheet1
guide	set	PAMstrand	chr	chr.start	chr.end	geneSys	gene	gene.start	gene.end	essential	prot.start	prot.end	refaa	varaa	mut1	mut2	mut3	type	consequence	provean	maxAbsProvean
AAAAAATCAGTTAAATACTT	neStops	-	chrI	55486	55508	YAL047C	SPC72	1350	1372	FALSE	450	458	LKNQLNTLD	LKN*LNTLD	Q453*	NA	NA	coding	stop	NA	NA
AAAAACAAATATTTGGCACT	neStops	+	chrVII	746952	746974	YGR127W	YGR127W	155	177	FALSE	52	59	EKQIFGTW	EK*IFGTW	Q54*	NA	NA	coding	stop	NA	NA
AAAAACAAGACGGGAGGAAA	neStops	+	chrX	64472	64494	YJL197W	UBP12	668	690	FALSE	223	230	EKQDGRKR	EK*DGRKR	Q225*	NA	NA	coding	stop	NA	NA
AAAAACAGGCAGAGGAGTAT	neStops	-	chrXV	49948	49970	YOL145C	CTR9	2819	2841	FALSE	940	947	EKQAEEYR	EK*AEEYR	Q942*	NA	NA	coding	stop	NA	NA
AAAAACTCAAATGAAGTATA	neStops	+	chrXII	117814	117836	YLL015W	BPT1	1383	1405	FALSE	461	469	SKTQMKYKD	SKI*MKYKD	T463I	Q464*	NA	coding	stop	c(-3.323, NA)	3.323
AAAAAGACAGTTGTTAAGCT	neStops	+	chrIII	232492	232514	YCR066W	RAD18	993	1015	FALSE	331	339	LKRQLLSWD	LKR*LLSWD	Q334*	NA	NA	coding	stop	NA	NA
AAAAAGCAAATTTCTCTGGA	neStops	-	chrXI	316534	316556	YKL065C	YET1	502	524	FALSE	168	175	KKQISLEG	KK*ISLEG	Q170*	NA	NA	coding	stop	NA	NA
AAAAATCAAGAACTAGATGA	neStops	-	chrXI	501930	501952	YKR031C	SPO14	4444	4466	FALSE	1482	1489	KNQELDDG	KN*ELDDG	Q1484*	NA	NA	coding	stop	NA	NA
AAAAATCAGATAAATATTGA	neStops	-	chrII	553619	553641	YBR157C	ICS2	670	692	FALSE	224	231	KNQINIEG	KN*INIEG	Q226*	NA	NA	coding	stop	NA	NA
AAAACAAAACATACCATGGT	neStops	+	chrII	783421	783443	YBR290W	BSD2	831	853	FALSE	277	285	EKQNIPWLA	EK*NIPWLA	Q279*	NA	NA	coding	stop	NA	NA
AAAACAAATAGTCAGATCTC	neStops	-	chrIV	1121463	1121485	YDR326C	YSP2	3441	3463	FALSE	1147	1155	VKQIVRSPD	VK*IVRSPD	Q1149*	NA	NA	coding	stop	NA	NA
AAAACAAATATTAAAAGATT	neStops	+	chrVIII	347641	347663	YHR119W	SET1	1599	1621	FALSE	533	541	AKQILKDLE	AK*ILKDLE	Q535*	NA	NA	coding	stop	NA	NA
AAAACAATTTCAGATTTATA	neStops	+	chrII	104879	104901	YBL063W	KIP1	2994	3016	FALSE	998	1006	PKQFQIYRD	PK*FQIYRD	Q1000*	NA	NA	coding	stop	NA	NA
AAAACAATTTGATATTGAAA	neStops	-	chrXV	422769	422791	YOR049C	RSB1	942	964	FALSE	314	322	SKQFDIEKE	SK*FDIEKE	Q316*	NA	NA	coding	stop	NA	NA
AAAACAGCACTTGATCAGCG	neStops	-	chrXV	108572	108594	YOL111C	MDY2	303	325	FALSE	101	109	IKQHLISEE	IK*YLISEE	Q103*	H104Y	NA	coding	stop	c(NA, 1.955)	1.955
AAAACAGCAGCAAGTCTTGA	neStops	+	chrXV	692765	692787	YOR191W	ULS1	291	313	FALSE	97	105	VKQQQVLKE	VK**QVLKE	Q99*	Q100*	NA	coding	stop	c(NA, NA)	NA
AAAACAGCGGCGAGAACCTA	neStops	+	chrV	222797	222819	YER035W	EDC2	159	181	FALSE	53	61	TKQRREPRE	TK*WREPRE	Q55*	R56W	NA	coding	stop	c(NA, -3.118)	3.118
AAAACAGGAAGATAAGGTTA	neStops	-	chrXVI	326108	326130	YPL119C	DBP1	135	157	FALSE	45	53	PKQEDKVTG	PK*EDKVTG	Q47*	NA	NA	coding	stop	NA	NA
AAAACCATTCCTTATCACCA	neStops	-	chrXIV	738065	738087	YNR059W	MNT4	1263	1285	FALSE	421	429	FHGDKEWFW	FHGDKE*FW	W427*	NA	NA	coding	stop	NA	NA
AAAACCCAAAGGAACTTCAT	neStops	+	chrXII	82979	83001	YLL029W	FRA1	1519	1541	FALSE	507	514	KTQRNFMG	KI*RNFMG	T508I	Q509*	NA	coding	stop	c(-4.5, NA)	4.5
AAAACGAGACGATGTACGGT	neStops	+	chrIII	247280	247302	YCR073W-A	SOL2	318	340	FALSE	106	114	LKRDDVRWG	LK*DDVRWG	R108*	NA	NA	coding	stop	NA	NA
AAAACTCAAATAAAATTCAA	neStops	-	chrXIII	317319	317341	YMR021C	MAC1	1078	1100	FALSE	360	367	KTQIKFKG	KI*IKFKG	T361I	Q362*	NA	coding	stop	c(-2.723, NA)	2.723
AAAACTGCAAGATGGCAGGA	neStops	-	chrVIII	177825	177847	YHR034C	PIH1	153	175	FALSE	51	59	EKLQDGRKV	EKL*DGRKV	Q54*	NA	NA	coding	stop	NA	NA
AAAACTTCAGAATAATGAAA	neStops	+	chrXVI	690613	690635	YPR072W	NOT5	507	529	FALSE	169	177	KKLQNNEMD	KKF*NNEMD	L171F	Q172*	NA	coding	stop	c(-3.585, NA)	3.585
AAAAGAACAAGCAAAGGATA	neStops	-	chrII	180375	180397	YBL022C	PIM1	879	901	FALSE	293	301	SKEQAKDTD	SKE*AKDTD	Q296*	NA	NA	coding	stop	NA	NA
AAAAGAACAGAATAATCTAT	neStops	-	chrIV	1380159	1380181	YDR458C	HEH2	1866	1888	FALSE	622	630	IKEQNNLWA	IKE*NNLWA	Q625*	NA	NA	coding	stop	NA	NA
AAAAGACAATCCATGCATTT	neStops	+	chrII	380462	380484	YBR071W	YBR071W	52	74	FALSE	18	25	KRQSMHLG	KR*SMHLG	Q20*	NA	NA	coding	stop	NA	NA
AAAAGAGCAGCACATTGATA	neStops	-	chrXII	201027	201049	YLR028C	ADE16	267	289	FALSE	89	97	LKEQHIDKV	LKE*HIDKV	Q92*	NA	NA	coding	stop	NA	NA
AAAAGCAAAAAAGCATGGAA	neStops	+	chrXII	615896	615918	YLR238W	FAR10	1142	1164	FALSE	381	388	EKQKSMER	EK*KSMER	Q383*	NA	NA	coding	stop	NA	NA
AAAAGCAAATTGCCTTTGCC	neStops	-	chrV	118638	118660	YEL020C	PXP1	1640	1662	FALSE	547	554	QKQIAFAW	QK*IAFAW	Q549*	NA	NA	coding	stop	NA	NA
AAAAGCAATCTGTCGAACTA	neStops	-	chrXVI	554230	554252	YPL002C	SNF8	77	99	FALSE	26	33	EKQSVELR	EK*SVELR	Q28*	NA	NA	coding	stop	NA	NA
AAAAGCCGAAAGAAATTGTC	neStops	+	chrVII	96914	96936	YGL209W	MIG2	1057	1079	FALSE	353	360	KSRKKLSG	KS*KKLSG	R355*	NA	NA	coding	stop	NA	NA
AAAAGCTCGAGAAGTCACTA	neStops	-	chrIV	388097	388119	YDL036C	PUS9	783	805	FALSE	261	269	LKAREVTKE	LKV*EVTKE	A263V	R264*	NA	coding	stop	c(-2.695, NA)	2.695
AAAAGGCAAGAACAGGGCGA	neStops	-	chrIV	282707	282729	YDL100C	GET3	448	470	FALSE	150	157	KRQEQGEG	KR*EQGEG	Q152*	NA	NA	coding	stop	NA	NA
AAAAGTACAATTTGAAATAA	neStops	-	chrIV	1499599	1499621	YDR532C	KRE28	933	955	FALSE	311	319	GKVQFEIKD	GKV*FEIKD	Q314*	NA	NA	coding	stop	NA	NA
AAAAGTCCAATATAGCGAGA	neStops	+	chrII	493204	493226	YBR128C	ATG14	890	912	FALSE	297	304	SVSLYWTF	SVSLY*TF	W302*	NA	NA	coding	stop	NA	NA
AAAAGTTCCAATGACTTTCT	neStops	+	chrXIV	237396	237418	YNL219C	ALG9	246	268	FALSE	82	90	DLESHWNFF	DLESH*NFF	W87*	NA	NA	coding	stop	NA	NA
AAAATACAACCTAAGGAAAT	neStops	+	chrXVI	143842	143864	YPL216W	YPL216W	22	44	FALSE	8	15	KIQPKEIG	KI*PKEIG	Q10*	NA	NA	coding	stop	NA	NA
AAAATACGATGTGTTGCAAT	neStops	+	chrXII	948533	948555	YLR412W	BER1	166	188	FALSE	56	63	KIRCVAIG	KI*CVAIG	R58*	NA	NA	coding	stop	NA	NA
AAAATCAAAAGTTGTCTCAA	neStops	-	chrIII	20733	20755	YCL061C	MRC1	1352	1374	FALSE	451	458	QNQKLSQR	QN*KLSQR	Q453*	NA	NA	coding	stop	NA	NA
AAAATCAAGCTAATAGTTTG	neStops	-	chrIV	1084191	1084213	YDR310C	SUM1	104	126	FALSE	35	42	QNQANSLR	QN*ANSLR	Q37*	NA	NA	coding	stop	NA	NA
AAAATCACAAATCGAAACCA	neStops	-	chrX	675384	675406	YJR134C	SGM1	447	469	FALSE	149	157	RKSQIETTD	RKL*IETTD	S151L	Q152*	NA	coding	stop	c(-1.415, NA)	1.415
AAAATGCAGAATAATGGCTC	neStops	+	chrXIII	606734	606756	YMR172W	HOT1	754	776	FALSE	252	259	KMQNNGSG	KM*NNGSG	Q254*	NA	NA	coding	stop	NA	NA
AAAATGGCAGGACGAATTGA	neStops	-	chrVII	972429	972451	YGR240C	PFK1	1284	1306	FALSE	428	436	GKWQDELKE	GKW*DELKE	Q431*	NA	NA	coding	stop	NA	NA
AAAATTTCGAGAAGACAACA	neStops	+	chrX	162948	162970	YJL132W	YJL132W	1035	1057	FALSE	345	353	GKFREDNKD	GKF*EDNKD	R348*	NA	NA	coding	stop	NA	NA
AAACAAAAGAAGCGAGCTGG	neStops	-	chrXI	223440	223462	YKL114C	APN1	994	1016	FALSE	332	339	KQKKRAGG	K*KKRAGG	Q333*	NA	NA	coding	stop	NA	NA
AAACAAACCACGTCACAAGT	neStops	+	chrXI	553184	553206	YKR058W	GLG1	415	437	FALSE	139	146	KQTTSQVG	K*ITSQVG	Q140*	T141I	NA	coding	stop	c(NA, -3.883)	3.883
AAACAAATGAAAGAACTGAT	neStops	+	chrX	618825	618847	YJR101W	RSM26	592	614	FALSE	198	205	KQMKELIG	K*MKELIG	Q199*	NA	NA	coding	stop	NA	NA
AAACAAATGGAACGTGTCGA	neStops	-	chrIII	167419	167441	YCR027C	RHB1	559	581	FALSE	187	194	KQMERVEG	K*MERVEG	Q188*	NA	NA	coding	stop	NA	NA
AAACAACCAAAGTTCGACGT	neStops	+	chrXIII	147136	147158	YML063W	RPS1B	655	677	FALSE	219	226	KQPKFDVG	K*LKFDVG	Q220*	P221L	NA	coding	stop	c(NA, -9.793)	9.793
AAACAACCAAAGTTCGATGT	neStops	-	chrXII	1018232	1018254	YLR441C	RPS1A	655	677	FALSE	219	226	KQPKFDVG	K*LKFDVG	Q220*	P221L	NA	coding	stop	c(NA, -9.793)	9.793
AAACAACGAGCCAAAGAAGC	neStops	+	chrIV	1169859	1169881	YDR347W	MRP1	682	704	FALSE	228	235	KQRAKEAG	K**AKEAG	Q229*	R230*	NA	coding	stop	c(NA, NA)	NA
AAACAACGTAGAGGTCGTGC	neStops	+	chrXII	961332	961354	YLR419W	YLR419W	2905	2927	FALSE	969	976	KQRRGRAG	K*CRGRAG	Q970*	R971C	NA	coding	stop	c(NA, -8)	8
AAACAACGTGCCATAACTCC	neStops	-	chrIV	392744	392766	YDL033C	SLM3	1147	1169	FALSE	383	390	KQRAITPG	K*CAITPG	Q384*	R385C	NA	coding	stop	c(NA, -7.966)	7.966
AAACAACTGGTCAAGCCAAT	neStops	+	chrXII	907190	907212	YLR393W	ATP10	112	134	FALSE	38	45	KQLVKPIG	K*LVKPIG	Q39*	NA	NA	coding	stop	NA	NA
AAACAAGAGACTAAGTCACT	neStops	-	chrVII	613318	613340	YGR061C	ADE6	2626	2648	FALSE	876	883	KQETKSLG	K*ETKSLG	Q877*	NA	NA	coding	stop	NA	NA
AAACAAGCAAAGGGAAGATA	neStops	-	chrIV	661982	662004	YDR104C	SPO71	2907	2929	FALSE	969	977	KNKQREDTE	KNK*REDTE	Q972*	NA	NA	coding	stop	NA	NA
AAACAATACTTGGAAATCAC	neStops	+	chrX	453246	453268	YJR008W	MHO1	817	839	FALSE	273	280	KQYLEITG	K*YLEITG	Q274*	NA	NA	coding	stop	NA	NA
AAACAATTACAATTGGAATT	neStops	+	chrXI	571804	571826	YKR069W	MET1	193	215	FALSE	65	72	KQLQLEFG	K*LQLEFG	Q66*	NA	NA	coding	stop	NA	NA
AAACAATTTGTTGTGGAGAA	neStops	+	chrIV	707280	707302	YDR127W	ARO1	2797	2819	FALSE	933	940	KQFVVENG	K*FVVENG	Q934*	NA	NA	coding	stop	NA	NA
AAACACCAACTAGAGCCGCA	neStops	-	chrVI	179782	179804	YFR016C	YFR016C	940	962	FALSE	314	321	KHQLEPHG	KY*LEPHG	H315Y	Q316*	NA	coding	stop	c(-0.033, NA)	0.033
AAACAGAAATATGGGAAAAG	neStops	+	chrII	465866	465888	YBR113W	YBR113W	301	323	FALSE	101	108	KQKYGKRG	K*KYGKRG	Q102*	NA	NA	coding	stop	NA	NA
AAACAGAGCTGGAAAAGAGC	neStops	+	chrXV	525995	526017	YOR109W	INP53	718	740	FALSE	240	247	KQSWKRAG	K*SWKRAG	Q241*	NA	NA	coding	stop	NA	NA
AAACAGATGAGAGGTGTGCC	neStops	+	chrXVI	161469	161491	YPL207W	TYW1	1561	1583	FALSE	521	528	KQMRGVPG	K*MRGVPG	Q522*	NA	NA	coding	stop	NA	NA
AAACAGCCATTGGTACCCAT	neStops	+	chrXIII	216522	216544	YML030W	RCF1	88	110	FALSE	30	37	KQPLVPIG	K*LLVPIG	Q31*	P32L	NA	coding	stop	c(NA, -9.963)	9.963
AAACAGGATATTTACGAGTT	neStops	-	chrIX	352230	352252	YIL002C	INP51	1180	1202	FALSE	394	401	KQDIYEFG	K*DIYEFG	Q395*	NA	NA	coding	stop	NA	NA
AAACAGGATGCCATTGATAA	neStops	+	chrII	248066	248088	YBR006W	UGA2	1057	1079	FALSE	353	360	KQDAIDKG	K*DAIDKG	Q354*	NA	NA	coding	stop	NA	NA
AAACAGGCTAAAATAAGGGC	neStops	-	chrXV	857668	857690	YOR290C	SNF2	2569	2591	FALSE	857	864	KQAKIRAG	K*VKIRAG	Q858*	A859V	NA	coding	stop	c(NA, -2.728)	2.728
AAACAGTTTGAAGGGTCGGC	neStops	+	chrXVI	785006	785028	YPR122W	AXL1	2962	2984	FALSE	988	995	KQFEGSAG	K*FEGSAG	Q989*	NA	NA	coding	stop	NA	NA
AAACCAAAAGCCTGAAAACA	neStops	-	chrXII	59001	59023	YLL040C	VPS13	4623	4645	FALSE	1541	1549	TNQKPENKA	TN*KPENKA	Q1543*	NA	NA	coding	stop	NA	NA
AAACCAACCAGAATAACACC	neStops	+	chrII	796891	796913	YBR296C	PHO89	1610	1632	FALSE	537	544	AWCYSGWF	AWCYSD*F	G542D	W543*	NA	coding	stop	c(-6.63, NA)	6.63
AAACCAAGAGTAAACAAACC	neStops	+	chrVII	732346	732368	YGR121C	MEP1	560	582	FALSE	187	194	SGFVYSWF	SGFVYS*F	W193*	NA	NA	coding	stop	NA	NA
AAACCAATACAGCCTGACAA	neStops	-	chrXI	528200	528222	YKR050W	TRK2	386	408	FALSE	129	136	AFVRLYWF	AFVRLY*F	W135*	NA	NA	coding	stop	NA	NA
AAACCAATGGTGTTTACTAC	neStops	-	chrIV	102696	102718	YDL199C	YDL199C	636	658	FALSE	212	220	LNQWCLLLG	LN*WCLLLG	Q214*	NA	NA	coding	stop	NA	NA
AAACCACCAACTACAAAGAG	neStops	-	chrXVI	77091	77113	YPL249C	GYP5	2241	2263	FALSE	747	755	QNHQLQREA	QNY*LQREA	H749Y	Q750*	NA	coding	stop	c(-2.112, NA)	2.112
AAACCAGCAAGTGCAGAGAT	neStops	+	chrXV	956999	957021	YOR338W	YOR338W	102	124	FALSE	34	42	LNQQVQRLA	LN**VQRLA	Q36*	Q37*	NA	coding	stop	c(NA, NA)	NA
AAACCAGTAAAAAAAGTGTT	neStops	-	chrII	515971	515993	YBR139W	YBR139W	308	330	FALSE	103	110	SKHFFYWF	SKHFFY*F	W109*	NA	NA	coding	stop	NA	NA
AAACCAGTCTTCAAAGCCTA	neStops	+	chrXV	292597	292619	YOL017W	ESC8	69	91	FALSE	23	31	KNQSSKPRV	KN*SSKPRV	Q25*	NA	NA	coding	stop	NA	NA
AAACCAGTTGTTCCAATGAA	neStops	-	chrXIV	207249	207271	YNL236W	SIN4	320	342	FALSE	107	114	SIHWNNWF	SIHWNN*F	W113*	NA	NA	coding	stop	NA	NA
AAACCATTGAGTGGATCTCC	neStops	+	chrII	323145	323167	YBR043C	QDR3	779	801	FALSE	260	267	PWRSTQWF	PWRSTQ*F	W266*	NA	NA	coding	stop	NA	NA
AAACCATTGCTGAGAAACAA	neStops	-	chrVIII	183547	183569	YHR037W	PUT2	1571	1593	FALSE	524	531	AVVSQQWF	AVVSQQ*F	W530*	NA	NA	coding	stop	NA	NA
AAACCCCAAAATATTACTTC	neStops	-	chrXIII	154897	154919	YML059C	NTE1	3340	3362	FALSE	1114	1121	KPQNITSG	KF*NITSG	P1115F	Q1116*	NA	coding	stop	c(0.061, NA)	0.061
AAACGAAATGCAAAAGATGG	neStops	-	chrXIII	828307	828329	YMR280C	CAT8	3001	3023	FALSE	1001	1008	KRNAKDGG	K*NAKDGG	R1002*	NA	NA	coding	stop	NA	NA
AAACGAACAAATATCACCAG	neStops	-	chrVIII	36531	36553	YHL032C	GUT1	1956	1978	FALSE	652	660	KNEQISPEA	KNE*ISPEA	Q655*	NA	NA	coding	stop	NA	NA
AAACGACGTGAAGGTGATAT	neStops	+	chrXI	529039	529061	YKR050W	TRK2	1225	1247	FALSE	409	416	KRREGDIG	K*CEGDIG	R410*	R411C	NA	coding	stop	c(NA, -2.508)	2.508
AAACGAGGTCCCAAGTCCAT	neStops	+	chrXVI	931499	931521	YPR196W	YPR196W	124	146	FALSE	42	49	KRGPKSIG	K*GPKSIG	R43*	NA	NA	coding	stop	NA	NA
AAACGAGGTGTGCTAGCTAC	neStops	-	chrVII	492838	492860	YGL003C	CDH1	1315	1337	FALSE	439	446	KRGVLATG	K*GVLATG	R440*	NA	NA	coding	stop	NA	NA
AAACGGACAAGGCACCACCC	neStops	+	chrX	190201	190223	YJL122W	ALB1	486	508	FALSE	162	170	ENGQGTTLG	ENG*GTTLG	Q165*	NA	NA	coding	stop	NA	NA
AAACTATCAGCCAGGTGTAC	neStops	-	chrXIV	292504	292526	YNL185C	MRPL19	144	166	FALSE	48	56	ANYQPGVPV	ANY*PGVPV	Q51*	NA	NA	coding	stop	NA	NA
AAACTCAACATATTACAAGA	neStops	-	chrXIII	786637	786659	YMR259C	TRM732	2225	2247	FALSE	742	749	KTQHITRR	KI*HITRR	T743I	Q744*	NA	coding	stop	c(-5.058, NA)	5.058
AAACTCAACCAACAGACCAT	neStops	-	chrXII	162949	162971	YLR006C	SSK1	923	945	FALSE	308	315	KTQPTDHG	KI*PTDHG	T309I	Q310*	NA	coding	stop	c(-0.037, NA)	0.037
AAACTCAAGACTTAAAAGTC	neStops	-	chrII	428106	428128	YBR092C	PHO3	974	996	FALSE	325	332	ETQDLKVW	EI*DLKVW	T326I	Q327*	NA	coding	stop	c(-1.787, NA)	1.787
AAACTCTCAGGATACAATAT	neStops	-	chrXIII	382439	382461	YMR053C	STB2	438	460	FALSE	146	154	GNSQDTISG	GNF*DTISG	S148F	Q149*	NA	coding	stop	c(-4.585, NA)	4.585
AAACTCTCAGGGGAGTCCTG	neStops	-	chrXII	244941	244963	YLR049C	YLR049C	210	232	FALSE	70	78	ANSQGSPVA	ANF*GSPVA	S72F	Q73*	NA	coding	stop	c(-1.872, NA)	1.872
AAACTGCAACCCGTGCTAAG	neStops	-	chrVIII	60555	60577	YHL023C	NPR3	1987	2009	FALSE	663	670	KLQPVLRG	KL*PVLRG	Q665*	NA	NA	coding	stop	NA	NA
AAACTGCAGCAAATGAAAAA	neStops	-	chrIX	215340	215362	YIL077C	YIL077C	592	614	FALSE	198	205	KLQQMKKG	KL*QMKKG	Q200*	NA	NA	coding	stop	NA	NA
AAACTTCAACAAAAACGTGT	neStops	+	chrXVI	176517	176539	YPL195W	APL5	295	317	FALSE	99	106	KLQQKRVG	KF*QKRVG	L100F	Q101*	NA	coding	stop	c(0.342, NA)	0.342
AAACTTTCAAAAATTAATAT	neStops	+	chrV	145049	145071	YEL006W	YEA6	723	745	FALSE	241	249	SNFQKLILA	SNF*KLILA	Q244*	NA	NA	coding	stop	NA	NA
AAAGACAAGAGCATTTGAAG	neStops	-	chrV	421229	421251	YER130C	COM2	1196	1218	FALSE	399	406	KRQEHLKR	KR*EHLKR	Q401*	NA	NA	coding	stop	NA	NA
AAAGACAATCCATACAGAAC	neStops	-	chrII	504078	504100	YBR133C	HSL7	188	210	FALSE	63	70	QRQSIQNW	QR*SIQNW	Q65*	NA	NA	coding	stop	NA	NA
AAAGACCAATGTAACGTTGA	neStops	+	chrIV	947200	947222	YDR242W	AMD2	394	416	FALSE	132	139	KDQCNVEG	KD*CNVEG	Q134*	NA	NA	coding	stop	NA	NA
AAAGACCATAAATATTTCAA	neStops	+	chrIV	385457	385479	YDL037C	BSC1	109	131	FALSE	37	44	PLKYLWSL	PLKYL*SL	W42*	NA	NA	coding	stop	NA	NA
AAAGACCATACCGCTGAATC	neStops	+	chrX	388740	388762	YJL029C	VPS53	2092	2114	FALSE	698	705	PDSAVWSF	PDSAV*SF	W703*	NA	NA	coding	stop	NA	NA
AAAGAGCAAACGCCAATAGC	neStops	+	chrI	51510	51532	YAL051W	OAF1	2947	2969	FALSE	983	990	KEQTPIAG	KE*TPIAG	Q985*	NA	NA	coding	stop	NA	NA
AAAGAGCAGATTAAGTCTTT	neStops	+	chrXII	103767	103789	YLL021W	SPA2	2821	2843	FALSE	941	948	KEQIKSLG	KE*IKSLG	Q943*	NA	NA	coding	stop	NA	NA
AAAGAGTCAACCTGATTGGA	neStops	-	chrXV	140195	140217	YOL095C	HMI1	1131	1153	FALSE	377	385	LKSQPDWMD	LKS*PDWMD	Q380*	NA	NA	coding	stop	NA	NA
AAAGATACAAAAGCGTTTGA	neStops	+	chrVIII	344178	344200	YHR117W	TOM71	1830	1852	FALSE	610	618	AKIQKRLRA	AKI*KRLRA	Q613*	NA	NA	coding	stop	NA	NA
AAAGATTCAATTCCGGCTTA	neStops	+	chrXI	263507	263529	YKL094W	YJU3	159	181	FALSE	53	61	TKIQFRLMD	TKI*FRLMD	Q56*	NA	NA	coding	stop	NA	NA
AAAGCAAACTCCTACTACGA	neStops	+	chrII	218390	218412	YBL005W	PDR3	921	943	FALSE	307	315	IKQTPTTTA	IK*TPTTTA	Q309*	NA	NA	coding	stop	NA	NA
AAAGCAAATCAAAAGACAGT	neStops	-	chrXIV	540852	540874	YNL047C	SLM2	1008	1030	FALSE	336	344	EKQIKRQLV	EK*IKRQLV	Q338*	NA	NA	coding	stop	NA	NA
AAAGCAACCCCTAAAAAGAA	neStops	-	chrXIV	716785	716807	YNR051C	BRE5	1521	1543	FALSE	507	515	RKQPLKRKD	RK*SLKRKD	Q509*	P510S	NA	coding	stop	c(NA, 1.933)	1.933
AAAGCAAGAATCGGCGTTAA	neStops	+	chrVII	986040	986062	YGR248W	SOL4	69	91	FALSE	23	31	EKQESALTG	EK*ESALTG	Q25*	NA	NA	coding	stop	NA	NA
AAAGCAAGATGCTTTCTTCA	neStops	-	chrVII	329746	329768	YGL095C	VPS45	840	862	FALSE	280	288	SKQDAFFRD	SK*DAFFRD	Q282*	NA	NA	coding	stop	NA	NA
AAAGCAATTACCAACACCAC	neStops	+	chrVII	288820	288842	YGL117W	YGL117W	309	331	FALSE	103	111	PKQLPTPLV	PK*LPTPLV	Q105*	NA	NA	coding	stop	NA	NA
AAAGCAATTCATTAAAACTG	neStops	-	chrIV	1485646	1485668	YDR523C	SPS1	1371	1393	FALSE	457	465	LKQFIKTEA	LK*FIKTEA	Q459*	NA	NA	coding	stop	NA	NA
AAAGCAATTGGAACAGTATG	neStops	+	chrXVI	690523	690545	YPR072W	NOT5	417	439	FALSE	139	147	QKQLEQYEA	QK*LEQYEA	Q141*	NA	NA	coding	stop	NA	NA
AAAGCACAGAGATCGATCTG	neStops	+	chrI	62525	62547	YAL042W	ERV46	1210	1232	FALSE	404	411	KAQRSIWG	KV*RSIWG	A405V	Q406*	NA	coding	stop	c(-3.043, NA)	3.043
AAAGCAGAAAAGGAAAAATC	neStops	-	chrV	489657	489679	YER158C	YER158C	900	922	FALSE	300	308	TKQKRKNPE	TK*KRKNPE	Q302*	NA	NA	coding	stop	NA	NA
AAAGCAGATACGACTAAATC	neStops	+	chrV	225936	225958	YER037W	PHM8	48	70	FALSE	16	24	KKQIRLNQE	KK*IRLNQE	Q18*	NA	NA	coding	stop	NA	NA
AAAGCAGCAGATCCAATCTC	neStops	-	chrVII	451762	451784	YGL023C	PIB2	321	343	FALSE	107	115	RKQQIQSPA	RK**IQSPA	Q109*	Q110*	NA	coding	stop	c(NA, NA)	NA
AAAGCAGCATGGAAGTAATA	neStops	-	chrIV	271478	271500	YDL106C	PHO2	402	424	FALSE	134	142	KKQHGSNKD	KK*YGSNKD	Q136*	H137Y	NA	coding	stop	c(NA, -1.028)	1.028
AAAGCATCGATTCAACCAGC	neStops	-	chrII	698833	698855	YBR239C	ERT1	1089	1111	FALSE	363	371	LKHRFNQQD	LKY*FNQQD	H365Y	R366*	NA	coding	stop	c(-1.3, NA)	1.3
AAAGCGATATTCTGAGGCAA	neStops	+	chrXV	326070	326092	YOL001W	PHO80	822	844	FALSE	274	282	QKRYSEAKD	QK*YSEAKD	R276*	NA	NA	coding	stop	NA	NA
AAAGCGCAACTTCTAGGCGA	neStops	-	chrXV	396956	396978	YOR034C	AKR2	109	131	FALSE	37	44	KAQLLGDG	KV*LLGDG	A38V	Q39*	NA	coding	stop	c(-0.88, NA)	0.88
AAAGCTACAGAGACAACATC	neStops	+	chrIX	125109	125131	YIL125W	KGD1	2421	2443	FALSE	807	815	EKLQRQHQD	EKL*RQHQD	Q810*	NA	NA	coding	stop	NA	NA
AAAGCTCAAAAGCTAACACT	neStops	-	chrXVI	624638	624660	YPR029C	APL4	2308	2330	FALSE	770	777	KAQKLTLG	KV*KLTLG	A771V	Q772*	NA	coding	stop	c(-0.963, NA)	0.963
AAAGGAACAAGTAAAAGAAG	neStops	-	chrXI	337748	337770	YKL054C	DEF1	984	1006	FALSE	328	336	KKEQVKEEE	KKE*VKEEE	Q331*	NA	NA	coding	stop	NA	NA
AAAGGACCAACCGCTCTATA	neStops	+	chrXVI	902157	902179	YPR184W	GDB1	114	136	FALSE	38	46	PKDQPLYTV	PKD*PLYTV	Q41*	NA	NA	coding	stop	NA	NA
AAAGGCCAAAGTGTCCTTAA	neStops	+	chrXVI	50236	50258	YPL260W	CUB1	934	956	FALSE	312	319	KGQSVLNG	KG*SVLNG	Q314*	NA	NA	coding	stop	NA	NA
AAAGGCTCAGGAAACTGGTG	neStops	-	chrX	286730	286752	YJL080C	SCP160	2475	2497	FALSE	825	833	PKAQETGEV	PKV*ETGEV	A827V	Q828*	NA	coding	stop	c(-1.49, NA)	1.49
AAAGGCTCAGGTTGATATAC	neStops	-	chrVII	640035	640057	YGR078C	PAC10	315	337	FALSE	105	113	TKAQVDIPE	TKV*VDIPE	A107V	Q108*	NA	coding	stop	c(-3.967, NA)	3.967
AAAGTACAGAGAGAGAATAA	neStops	-	chrXVI	182749	182771	YPL192C	PRM3	286	308	FALSE	96	103	KVQRENKG	KV*RENKG	Q98*	NA	NA	coding	stop	NA	NA
AAAGTCACAAAAAACCCCCG	neStops	+	chrXIV	275756	275778	YNL193W	YNL193W	1389	1411	FALSE	463	471	EKSQKTPGG	EKL*KTPGG	S465L	Q466*	NA	coding	stop	c(-2.676, NA)	2.676
AAAGTGCAAGGAAGGTCCTT	neStops	-	chrIV	1466811	1466833	YDR508C	GNP1	1612	1634	FALSE	538	545	KVQGRSLG	KV*GRSLG	Q540*	NA	NA	coding	stop	NA	NA
AAAGTTCAACGTATTGAAAG	neStops	-	chrVII	615559	615581	YGR061C	ADE6	385	407	FALSE	129	136	KVQRIERG	KV*RIERG	Q131*	NA	NA	coding	stop	NA	NA
AAAGTTCAAGAAAATGACGT	neStops	+	chrXII	636025	636047	YLR248W	RCK2	1774	1796	FALSE	592	599	KVQENDVG	KV*ENDVG	Q594*	NA	NA	coding	stop	NA	NA
AAAGTTCGAAAACCAATGAC	neStops	-	chrXIII	570496	570518	YMR156C	TPP1	499	521	FALSE	167	174	KVRKPMTG	KV*KPMTG	R169*	NA	NA	coding	stop	NA	NA
AAAGTTTCAAGCCGTAGGCG	neStops	-	chrV	247998	248020	YER048C	CAJ1	138	160	FALSE	46	54	AKFQAVGEA	AKF*AVGEA	Q49*	NA	NA	coding	stop	NA	NA
AAATCAAAGCATTTCTACCA	neStops	-	chrVII	172992	173014	YGL176C	YGL176C	66	88	FALSE	22	30	ENQSISTTG	EN*SISTTG	Q24*	NA	NA	coding	stop	NA	NA
AAATCAAATGGCTGACAGTG	neStops	+	chrXI	360448	360470	YKL041W	VPS24	306	328	FALSE	102	110	SNQMADSAG	SN*MADSAG	Q104*	NA	NA	coding	stop	NA	NA
AAATCAACTTTCTCCTCCAT	neStops	+	chrV	73051	73073	YEL043W	YEL043W	2574	2596	FALSE	858	866	TNQLSPPLE	TN*FSPPLE	Q860*	L861F	NA	coding	stop	c(NA, -0.457)	0.457
AAATCAAGAGAGACTTGAAG	neStops	+	chrVI	92230	92252	YFL023W	BUD27	1245	1267	FALSE	415	423	INQERLEGE	IN*ERLEGE	Q417*	NA	NA	coding	stop	NA	NA
AAATCAAGATGAATTGGCGC	neStops	-	chrXII	606543	606565	YLR231C	BNA5	555	577	FALSE	185	193	VNQDELALV	VN*DELALV	Q187*	NA	NA	coding	stop	NA	NA
AAATCAATGGGAAGATGACA	neStops	+	chrX	457606	457628	YJR010W	MET3	1368	1390	FALSE	456	464	PNQWEDDKD	PN*WEDDKD	Q458*	NA	NA	coding	stop	NA	NA
AAATCAATTATGGTCAGAAG	neStops	+	chrXIII	211996	212018	YML034W	SRC1	2346	2368	FALSE	782	790	KNQLWSEVV	KN*LWSEVV	Q784*	NA	NA	coding	stop	NA	NA
AAATCAATTGCAACAGCTAT	neStops	+	chrXIII	877371	877393	YMR304W	UBP15	2385	2407	FALSE	795	803	VNQLQQLSD	VN*LQQLSD	Q797*	NA	NA	coding	stop	NA	NA
AAATCAGTCTGTCATGAACT	neStops	+	chrIV	566079	566101	YDR057W	YOS9	153	175	FALSE	51	59	QNQSVMNSG	QN*SVMNSG	Q53*	NA	NA	coding	stop	NA	NA
AAATCATCAGGGTGAAGAGG	neStops	+	chrX	151074	151096	YJL140W	RPB4	114	136	FALSE	38	46	INHQGEEEE	INY*GEEEE	H40Y	Q41*	NA	coding	stop	c(-4.911, NA)	4.911
AAATCCAACCCATCCAGCCC	neStops	-	chrXII	569709	569731	YLR214W	FRE1	1143	1165	FALSE	381	389	TLGWMGWIW	TLGWMG*IW	W387*	NA	NA	coding	stop	NA	NA
AAATCCAACTACTGTTATCT	neStops	+	chrXV	1027012	1027034	YOR368W	RAD17	170	192	FALSE	57	64	KIQLLLSR	KI*LLLSR	Q59*	NA	NA	coding	stop	NA	NA
AAATCTCAGGGAAAAGCTTC	neStops	+	chrIX	39466	39488	YIL161W	YIL161W	34	56	FALSE	12	19	KSQGKASG	KF*GKASG	S13F	Q14*	NA	coding	stop	c(-0.795, NA)	0.795
AAATGAGCGACTAGTTATTA	neStops	-	chrIV	266505	266527	YDL109C	YDL109C	675	697	FALSE	225	233	PNERLVIKG	PNE*LVIKG	R228*	NA	NA	coding	stop	NA	NA
AAATGCAGAAAGAGTTGGAC	neStops	+	chrXV	935422	935444	YOR328W	PDR10	3620	3642	FALSE	1207	1214	EMQKELDW	EM*KELDW	Q1209*	NA	NA	coding	stop	NA	NA
AAATGCAGCGTGACGATTTG	neStops	+	chrXII	843111	843133	YLR357W	RSC2	1781	1803	FALSE	594	601	KMQRDDLG	KM*RDDLG	Q596*	NA	NA	coding	stop	NA	NA
AAATGCGCCATCTGGCCTGT	neStops	-	chrII	411095	411117	YBR084W	MIS1	42	64	FALSE	14	22	FQQARWRIY	FQQAR*HIY	W19*	R20H	NA	coding	stop	c(NA, -0.963)	0.963
AAATGGGCAAGCGTCTACTA	neStops	-	chrVI	179741	179763	YFR016C	YFR016C	981	1003	FALSE	327	335	ENGQASTKD	ENG*ASTKD	Q330*	NA	NA	coding	stop	NA	NA
AAATTACAAAAGAATTATGA	neStops	+	chrXII	519974	519996	YLR182W	SWI6	2035	2057	FALSE	679	686	KLQKNYEG	KL*KNYEG	Q681*	NA	NA	coding	stop	NA	NA
AAATTACAAAATACGAACGG	neStops	+	chrXII	519482	519504	YLR182W	SWI6	1543	1565	FALSE	515	522	KLQNTNGG	KL*NTNGG	Q517*	NA	NA	coding	stop	NA	NA
AAATTATCAGATCACCATCG	neStops	-	chrIV	452103	452125	YDR001C	NTH1	351	373	FALSE	117	125	KNYQITIED	KNY*ITIED	Q120*	NA	NA	coding	stop	NA	NA
AAATTCAAAAAGATAAGAAC	neStops	+	chrXIV	193842	193864	YNL242W	ATG2	2519	2541	FALSE	840	847	KIQKDKNW	KI*KDKNW	Q842*	NA	NA	coding	stop	NA	NA
AAATTCAAATGATGTCTGAT	neStops	+	chrXVI	496479	496501	YPL029W	SUV3	974	996	FALSE	325	332	EIQMMSDG	EI*MMSDG	Q327*	NA	NA	coding	stop	NA	NA
AAATTCAGGCCATTGTACCA	neStops	-	chrX	644664	644686	YJR119C	JHD2	1805	1827	FALSE	602	609	KIQAIVPR	KI*AIVPR	Q604*	NA	NA	coding	stop	NA	NA
AAATTCCAGCATCAAGGGTT	neStops	-	chrXVI	384921	384943	YPL086C	ELP3	1504	1526	FALSE	502	509	KFQHQGFG	KF*HQGFG	Q504*	NA	NA	coding	stop	NA	NA
AAATTCGAATCCATTTAGCT	neStops	-	chrVII	835025	835047	YGR169C	PUS6	857	879	FALSE	286	293	QIRIHLAR	QI*IHLAR	R288*	NA	NA	coding	stop	NA	NA
AAATTGCAAATTGCTTTATT	neStops	+	chrXII	1046107	1046129	YLR454W	FMP27	2110	2132	FALSE	704	711	KLQIALFG	KL*IALFG	Q706*	NA	NA	coding	stop	NA	NA
AAATTTCAAAATGACCCCAT	neStops	-	chrXIV	258610	258632	YNL204C	SPS18	646	668	FALSE	216	223	KFQNDPIG	KF*NDPIG	Q218*	NA	NA	coding	stop	NA	NA
AAATTTCCATTGTGTGCTAG	neStops	-	chrXI	637058	637080	YKR099W	BAS1	1208	1230	FALSE	403	410	SSSTQWKF	SSSTQ*KF	W408*	NA	NA	coding	stop	NA	NA
AACAAACCATAAAGACATCA	neStops	+	chrVIII	112741	112763	YHR004C	NEM1	332	354	FALSE	111	118	PLMSLWFV	PLMSL*FV	W116*	NA	NA	coding	stop	NA	NA
AACAACAGCGCAAAAGAGCC	neStops	-	chrXII	607656	607678	YLR233C	EST1	1847	1869	FALSE	616	623	EQQRKRAG	EQ*RKRAG	Q618*	NA	NA	coding	stop	NA	NA
AACAACAGGAAAAGATGGAT	neStops	+	chrXII	1024460	1024482	YLR445W	GMC2	272	294	FALSE	91	98	QQQEKMDW	QQ*EKMDW	Q93*	NA	NA	coding	stop	NA	NA
AACAACCAAGCAAGGACAAC	neStops	+	chrVII	929115	929137	YGR217W	CCH1	4420	4442	FALSE	1474	1481	NNQARTTG	NN*ARTTG	Q1476*	NA	NA	coding	stop	NA	NA
AACAAGACAGCAGAACTCGC	neStops	+	chrII	24163	24185	YBL102W	SFT2	66	88	FALSE	22	30	QTRQQNSQG	QTR*QNSQG	Q25*	NA	NA	coding	stop	NA	NA
AACACAAAGCCAAGAATTTC	neStops	-	chrXI	547100	547122	YKR054C	DYN1	804	826	FALSE	268	276	QTQSQEFQV	QT*SQEFQV	Q270*	NA	NA	coding	stop	NA	NA
AACACAATGTTTAAATCCAA	neStops	-	chrXIII	325063	325085	YMR026C	PEX12	351	373	FALSE	117	125	LTQCLNPKG	LT*CLNPKG	Q119*	NA	NA	coding	stop	NA	NA
AACACAGAATTCGAGCAAAC	neStops	+	chrVII	750744	750766	YGR129W	SYF2	345	367	FALSE	115	123	QTQNSSKQD	QT*NSSKQD	Q117*	NA	NA	coding	stop	NA	NA
AACACAGATACTAGAATACT	neStops	+	chrXVI	427027	427049	YPL066W	RGL1	795	817	FALSE	265	273	TTQILEYLE	TT*ILEYLE	Q267*	NA	NA	coding	stop	NA	NA
AACACAGCGATTACTTAAAA	neStops	+	chrXIV	96376	96398	YNL285W	YNL285W	204	226	FALSE	68	76	ETQRLLKRV	ET**LLKRV	Q70*	R71*	NA	coding	stop	c(NA, NA)	NA
AACACAGGCAGTGCAAGATG	neStops	+	chrXIV	638599	638621	YNR006W	VPS27	1614	1636	FALSE	538	546	GTQAVQDEE	GT*AVQDEE	Q540*	NA	NA	coding	stop	NA	NA
AACACCCAACATCTTGGTGA	neStops	+	chrXV	848089	848111	YOR283W	YOR283W	637	659	FALSE	213	220	NTQHLGDG	NI*HLGDG	T214I	Q215*	NA	coding	stop	c(-5.7, NA)	5.7
AACACGATCTACTGTACAGA	neStops	-	chrXII	376875	376897	YLR114C	AVL9	342	364	FALSE	114	122	VTRSTVQKA	VT*STVQKA	R116*	NA	NA	coding	stop	NA	NA
AACACTACAGTACCTAGGTA	neStops	+	chrXV	213611	213633	YOL061W	PRS5	1368	1390	FALSE	456	464	RTLQYLGKD	RTL*YLGKD	Q459*	NA	NA	coding	stop	NA	NA
AACAGAGCAGCAAGTGGCTT	neStops	-	chrIX	188211	188233	YIL093C	RSM25	552	574	FALSE	184	192	ETEQQVALE	ETE*QVALE	Q187*	NA	NA	coding	stop	NA	NA
AACAGCAAATTCAAGAGGCT	neStops	+	chrXV	165204	165226	YOL084W	PHM7	2849	2871	FALSE	950	957	KQQIQEAR	KQ*IQEAR	Q952*	NA	NA	coding	stop	NA	NA
AACATACAAATGTCCAAGGA	neStops	-	chrXIV	137624	137646	YNL270C	ALP1	16	38	FALSE	6	13	NIQMSKEG	NI*MSKEG	Q8*	NA	NA	coding	stop	NA	NA
AACATACAGGATTACTTGCA	neStops	+	chrIX	371373	371395	YIR007W	EGH1	670	692	FALSE	224	231	NIQDYLQG	NI*DYLQG	Q226*	NA	NA	coding	stop	NA	NA
AACATCCCAAATCTTCTCAT	neStops	+	chrXVI	457574	457596	YPL053C	KTR6	863	885	FALSE	288	295	ANEKIWDV	ANEKI*NV	W293*	D294N	NA	coding	stop	c(NA, -1.324)	1.324
AACATTCCAACTAAATTGAA	neStops	+	chrVIII	24400	24422	YHL038C	CBP2	1088	1110	FALSE	363	370	SFQFSWNV	SFQFS*NV	W368*	NA	NA	coding	stop	NA	NA
AACCAAAATAAGAGGGAACC	neStops	+	chrI	96180	96202	YAL026C	DRS2	3496	3518	FALSE	1166	1173	PGSLLFWL	PGSLLF*L	W1172*	NA	NA	coding	stop	NA	NA
AACCAAAATTTCATACTCAT	neStops	-	chrXVI	798717	798739	YPR134W	MSS18	667	689	FALSE	223	230	PMSMKFWL	PMSMKF*L	W229*	NA	NA	coding	stop	NA	NA
AACCAAACACATGAGTCACC	neStops	-	chrIV	566956	566978	YDR057W	YOS9	1030	1052	FALSE	344	351	PGDSCVWL	PGDSCI*L	V349I	W350*	NA	coding	stop	c(-0.322, NA)	0.322
AACCAAACAGCTTGTAAAAT	neStops	-	chrXI	409717	409739	YKL015W	PUT3	1174	1196	FALSE	392	399	PILQAVWF	PILQAI*F	V397I	W398*	NA	coding	stop	c(0.868, NA)	0.868
AACCAAACATCTGTGTATAA	neStops	-	chrIV	815490	815512	YDR176W	NGG1	1039	1061	FALSE	347	354	PLYTDVWF	PLYTDI*F	V352I	W353*	NA	coding	stop	c(-0.531, NA)	0.531
AACCAAACCACCATGGAATA	neStops	-	chrXV	287341	287363	YOL020W	TAT2	1170	1192	FALSE	390	398	GLIPWWFGY	GLIPW*FSY	W395*	G397S	NA	coding	stop	c(NA, -2.938)	2.938
AACCAAACCAGGGACGCTAA	neStops	-	chrXV	791622	791644	YOR243C	PUS7	598	620	FALSE	200	207	NQTRDANG	N*IRDANG	Q201*	T202I	NA	coding	stop	c(NA, -3.78)	3.78
AACCAAACGTTTACCGGTGT	neStops	-	chrXII	586965	586987	YLR224W	UCC1	502	524	FALSE	168	175	PTPVNVWF	PTPVNI*F	V173I	W174*	NA	coding	stop	c(-0.067, NA)	0.067
AACCAAATCATAACGATCAA	neStops	+	chrX	174743	174765	YJL129C	TRK1	2542	2564	FALSE	848	855	PLIVMIWF	PLIVMI*F	W854*	NA	NA	coding	stop	NA	NA
AACCAAATCGAGTTACCAAC	neStops	+	chrVII	692375	692397	YGR100W	MDR1	2131	2153	FALSE	711	718	NQIELPTG	N*IELPTG	Q712*	NA	NA	coding	stop	NA	NA
AACCAAATTATTGTTAGAGT	neStops	+	chrII	320447	320469	YBR042C	CST26	1141	1163	FALSE	381	388	PTLTIIWL	PTLTII*L	W387*	NA	NA	coding	stop	NA	NA
AACCAAATTGAGGAGAAGTT	neStops	-	chrXV	719764	719786	YOR198C	BFR1	280	302	FALSE	94	101	NQIEEKLG	N*IEEKLG	Q95*	NA	NA	coding	stop	NA	NA
AACCAAATTGGGGCTTCTAT	neStops	+	chrXI	285246	285268	YKL080W	VMA5	217	239	FALSE	73	80	NQIGASIG	N*IGASIG	Q74*	NA	NA	coding	stop	NA	NA
AACCAACACCATTTAAATAT	neStops	+	chrXVI	924719	924741	YPR194C	OPT2	2197	2219	FALSE	733	740	PIFKWCWL	PIFKWY*L	C738Y	W739*	NA	coding	stop	c(-9.945, NA)	9.945
AACCAACAGGACTTTGATAA	neStops	+	chrVIII	489308	489330	YHR194W	MDM31	652	674	FALSE	218	225	NQQDFDNG	N**DFDNG	Q219*	Q220*	NA	coding	stop	c(NA, NA)	NA
AACCAACCTTCAGCGTCTTG	neStops	+	chrXIV	62232	62254	YNL302C	RPS19B	139	161	FALSE	47	54	PQDAEGWF	PQDAEN*F	G52N	W53*	NA	coding	stop	c(-0.172, NA)	0.172
AACCAACCTTCGGCATCTTG	neStops	+	chrXV	92300	92322	YOL121C	RPS19A	139	161	FALSE	47	54	PQDAEGWF	PQDAEN*F	G52N	W53*	NA	coding	stop	c(-0.194, NA)	0.194
AACCAACCTTGGTGTGTCAT	neStops	+	chrXV	503245	503267	YOR094W	ARF3	451	473	FALSE	151	158	NQPWCVIG	N*FWCVIG	Q152*	P153F	NA	coding	stop	c(NA, -0.527)	0.527
AACCAAGAACCGTACGAACC	neStops	+	chrXI	116458	116480	YKL176C	LST4	1507	1529	FALSE	503	510	PGSYGSWF	PGSYGS*F	W509*	NA	NA	coding	stop	NA	NA
AACCAAGAGACCCAAAGAGT	neStops	-	chrIX	230912	230934	YIL070C	MAM33	139	161	FALSE	47	54	NQETQRVG	N*ETQRVG	Q48*	NA	NA	coding	stop	NA	NA
AACCAAGCAAGATTCTTTAT	neStops	-	chrXVI	495824	495846	YPL029W	SUV3	319	341	FALSE	107	114	PIKNLAWL	PIKNLT*L	A112T	W113*	NA	coding	stop	c(-0.517, NA)	0.517
AACCAAGCATCCTTTGGTCT	neStops	+	chrVIII	329503	329525	YHR108W	GGA2	1201	1223	FALSE	401	408	NQASFGLG	N*VSFGLG	Q402*	A403V	NA	coding	stop	c(NA, -0.519)	0.519
AACCAAGCATCGAAAGGAGA	neStops	-	chrI	131513	131535	YAL012W	CYS3	715	737	FALSE	239	246	PSPFDAWL	PSPFDT*L	A244T	W245*	NA	coding	stop	c(-0.437, NA)	0.437
AACCAAGCCAGCAAAAAATA	neStops	-	chrIV	1181933	1181955	YDR352W	YPQ2	133	155	FALSE	45	52	PYFLLAWL	PYFLLT*L	A50T	W51*	NA	coding	stop	c(-2.293, NA)	2.293
AACCAAGCGATCACTAGGAA	neStops	+	chrXV	195738	195760	YOL072W	THP1	769	791	FALSE	257	264	NQAITRNG	N*VITRNG	Q258*	A259V	NA	coding	stop	c(NA, -1.342)	1.342
AACCAAGCTATCTGGAAAAG	neStops	-	chrXII	931219	931241	YLR406C	RPL31B	166	188	FALSE	56	63	NQAIWKRG	N*VIWKRG	Q57*	A58V	NA	coding	stop	c(NA, -1.664)	1.664
AACCAAGGCAGTTCTAACAG	neStops	+	chrXI	311036	311058	YKL068W	NUP100	838	860	FALSE	280	287	NQGSSNSG	N*GSSNSG	Q281*	NA	NA	coding	stop	NA	NA
AACCAAGGCATCCCAGCCGA	neStops	-	chrII	717006	717028	YBR249C	ARO4	967	989	FALSE	323	330	NQGIPAEG	N*GIPAEG	Q324*	NA	NA	coding	stop	NA	NA
AACCAAGGCCTCTTCATAAA	neStops	+	chrIX	215868	215890	YIL077C	YIL077C	64	86	FALSE	22	29	PFMKRPWF	PFMKRP*F	W28*	NA	NA	coding	stop	NA	NA
AACCAAGTCTGTGATGCTGC	neStops	-	chrXVI	448171	448193	YPL058C	PDR12	2185	2207	FALSE	729	736	NQVCDAAG	N*VCDAAG	Q730*	NA	NA	coding	stop	NA	NA
AACCAAGTGTTGGTTGCACA	neStops	-	chrIV	741359	741381	YDR142C	PEX7	220	242	FALSE	74	81	NQVLVAQG	N*VLVAQG	Q75*	NA	NA	coding	stop	NA	NA
AACCAAGTTGATGGTTATGG	neStops	+	chrXIII	740344	740366	YMR234W	RNH1	79	101	FALSE	27	34	NQVDGYGG	N*VDGYGG	Q28*	NA	NA	coding	stop	NA	NA
AACCAATATAATTTCCAACA	neStops	-	chrXI	337081	337103	YKL054C	DEF1	1651	1673	FALSE	551	558	NQYNFQQG	N*YNFQQG	Q552*	NA	NA	coding	stop	NA	NA
AACCAATCAAATCTCAATGG	neStops	-	chrXV	859306	859328	YOR290C	SNF2	931	953	FALSE	311	318	NQSNLNGG	N*LNLNGG	Q312*	S313L	NA	coding	stop	c(NA, -0.96)	0.96
AACCAATCAACATTTAGTAA	neStops	-	chrII	656361	656383	YBR216C	YBP1	1218	1240	FALSE	406	414	ETNQHLVKE	ETN*HLVKE	Q409*	NA	NA	coding	stop	NA	NA
AACCAATCAGGAGCAATATG	neStops	-	chrIV	667796	667818	YDR106W	ARP10	793	815	FALSE	265	272	PHIAPDWF	PHIAPN*F	D270N	W271*	NA	coding	stop	c(-3.372, NA)	3.372
AACCAATCAGGCAATTCATC	neStops	+	chrXIV	470831	470853	YNL084C	END3	250	272	FALSE	84	91	PDELPDWL	PDELPN*L	D89N	W90*	NA	coding	stop	c(-4.083, NA)	4.083
AACCAATGGTGTTTACTACT	neStops	-	chrIV	102695	102717	YDL199C	YDL199C	637	659	FALSE	213	220	NQWCLLLG	N*WCLLLG	Q214*	NA	NA	coding	stop	NA	NA
AACCACCATAGTAGAAACAG	neStops	+	chrXVI	475392	475414	YPL041C	MRX11	328	350	FALSE	110	117	PLFLLWWL	PLFLL**L	W115*	W116*	NA	coding	stop	c(NA, NA)	NA
AACCACCTTGGAGGTGTAAA	neStops	-	chrIV	709711	709733	YDR128W	MTC5	163	185	FALSE	55	62	PFTPPRWL	PFTPPK*L	R60K	W61*	NA	coding	stop	c(-2.967, NA)	2.967
AACCACGGAGAAATTAATTG	neStops	+	chrX	218192	218214	YJL108C	PRM10	643	665	FALSE	215	222	PQLISPWF	PQLISP*F	W221*	NA	NA	coding	stop	NA	NA
AACCACTCGAAGGGACAAGC	neStops	+	chrXV	446197	446219	YOR064C	YNG1	520	542	FALSE	174	181	PACPFEWF	PACPFK*F	E179K	W180*	NA	coding	stop	c(-3.987, NA)	3.987
AACCACTTGGTAAAATCCAA	neStops	-	chrXI	553829	553851	YKR058W	GLG1	1060	1082	FALSE	354	361	PLDFTKWL	PLDFTK*L	W360*	NA	NA	coding	stop	NA	NA
AACCAGAAACAATCCCCGCA	neStops	-	chrVII	80789	80811	YGL222C	EDC1	376	398	FALSE	126	133	NQKQSPHG	N*KQSPHG	Q127*	NA	NA	coding	stop	NA	NA
AACCAGACCAAGGGATACAC	neStops	+	chrXIII	683171	683193	YMR207C	HFA1	372	394	FALSE	124	132	IPCIPWSGS	IPCIP*SSS	W129*	G131S	NA	coding	stop	c(NA, -5.699)	5.699
AACCAGATATTGGAAGTTTA	neStops	-	chrXV	191759	191781	YOL075C	YOL075C	1762	1784	FALSE	588	595	NQILEVYG	N*ILEVYG	Q589*	NA	NA	coding	stop	NA	NA
AACCAGCACATCGACACAGA	neStops	-	chrXII	713934	713956	YLR288C	MEC3	949	971	FALSE	317	324	NQHIDTDG	N*YIDTDG	Q318*	H319Y	NA	coding	stop	c(NA, -0.493)	0.493
AACCAGCATCGGACTACGAA	neStops	+	chrXIII	606812	606834	YMR172W	HOT1	832	854	FALSE	278	285	NQHRTTNG	N*YRTTNG	Q279*	H280Y	NA	coding	stop	c(NA, -0.392)	0.392
AACCAGCCCTCACCAAGAGT	neStops	-	chrXVI	45554	45576	YPL263C	KEL3	931	953	FALSE	311	318	NQPSPRVG	N*FSPRVG	Q312*	P313F	NA	coding	stop	c(NA, -10.306)	10.306
AACCAGCTAAAATTGTAATG	neStops	-	chrXII	323931	323953	YLR092W	SUL2	388	410	FALSE	130	137	PHYNFSWF	PHYNFN*F	S135N	W136*	NA	coding	stop	c(-0.111, NA)	0.111
AACCAGCTACTGCTTATTGG	neStops	+	chrXV	57805	57827	YOL141W	PPM2	1354	1376	FALSE	452	459	NQLLLIGG	N*LLLIGG	Q453*	NA	NA	coding	stop	NA	NA
AACCAGCTTACTTCGAATGG	neStops	+	chrXII	527358	527380	YLR187W	SKG3	2494	2516	FALSE	832	839	NQLTSNGG	N*FTSNGG	Q833*	L834F	NA	coding	stop	c(NA, -0.624)	0.624
AACCAGGAAATATTCAAAGA	neStops	+	chrVIII	27351	27373	YHL036W	MUP3	1111	1133	FALSE	371	378	NQEIFKEG	N*EIFKEG	Q372*	NA	NA	coding	stop	NA	NA
AACCAGGCATCACGATCAAT	neStops	+	chrI	52309	52331	YAL049C	AIM2	265	287	FALSE	89	96	PIDRDAWF	PIDRDT*F	A94T	W95*	NA	coding	stop	c(-0.996, NA)	0.996
AACCAGGTCCCTTGGTAATT	neStops	+	chrIV	393020	393042	YDL033C	SLM3	871	893	FALSE	291	298	PNYQGTWF	PNYQGT*F	W297*	NA	NA	coding	stop	NA	NA
AACCAGTATCTGTTTGACCA	neStops	+	chrI	184166	184188	YAR027W	UIP3	397	419	FALSE	133	140	NQYLFDHG	N*YLFDHG	Q134*	NA	NA	coding	stop	NA	NA
AACCAGTTCGACTTTGTGGA	neStops	-	chrIX	424020	424042	YIR038C	GTT1	472	494	FALSE	158	165	NQFDFVEG	N*FDFVEG	Q159*	NA	NA	coding	stop	NA	NA
AACCATCAGTATCCATGCTG	neStops	+	chrXII	364680	364702	YLR107W	REX3	565	587	FALSE	189	196	NHQYPCCG	NY*YPCCG	H190Y	Q191*	NA	coding	stop	c(-0.112, NA)	0.112
AACCATCCAACGTCGATGCA	neStops	-	chrX	361294	361316	YJL042W	MHP1	46	68	FALSE	16	23	PCIDVGWL	PCIDVK*L	G21K	W22*	NA	coding	stop	c(-0.954, NA)	0.954
AACCATCCATCTTTGATGTA	neStops	+	chrXII	433682	433704	YLR146C	SPE4	22	44	FALSE	8	15	PYIKDGWF	PYIKDK*F	G13K	W14*	NA	coding	stop	c(-7.137, NA)	7.137
AACCATGCCTCAAGCAAATC	neStops	-	chrXII	399236	399258	YLR128W	DCN1	613	635	FALSE	205	212	PDLLEAWF	PDLLET*F	A210T	W211*	NA	coding	stop	c(0.506, NA)	0.506
AACCCAAAAATCGGCAGATC	neStops	-	chrIX	322532	322554	YIL015W	BAR1	191	213	FALSE	64	71	TGSADFWV	TGSADF*V	W70*	NA	NA	coding	stop	NA	NA
AACCCAAACGGACCAGCAGT	neStops	+	chrXIII	272513	272535	YMR002W	MIX17	321	343	FALSE	107	115	QTQTDQQLG	QT*TDQQLG	Q109*	NA	NA	coding	stop	NA	NA
AACCCAAAGCATCCGACTAT	neStops	+	chrIX	298021	298043	YIL030C	SSM4	1967	1989	FALSE	656	663	SNSRMLWV	SNSRML*V	W662*	NA	NA	coding	stop	NA	NA
AACCCACGAGTTGATTTGAG	neStops	+	chrIII	73585	73607	YCL026C-B	HBN1	380	402	FALSE	127	134	AAQINSWV	AAQINS*V	W133*	NA	NA	coding	stop	NA	NA
AACCCAGAAGAAATAAATAT	neStops	+	chrXIII	901152	901174	YMR313C	TGL3	134	156	FALSE	45	52	TDIYFFWV	TDIYFF*V	W51*	NA	NA	coding	stop	NA	NA
AACCCAGTTAATCCAGGTAT	neStops	-	chrVIII	308648	308670	YHR099W	TRA1	5888	5910	FALSE	1963	1970	PDTWINWV	PDTWIN*V	W1969*	NA	NA	coding	stop	NA	NA
AACCCCATTTGTAAGTAGAG	neStops	-	chrII	343586	343608	YBR054W	YRO2	486	508	FALSE	162	170	VHSTYKWGY	VHSTYK*SY	W168*	G169S	NA	coding	stop	c(NA, -6)	6
AACCCGCAATTGCAGGCCAT	neStops	+	chrXIII	819367	819389	YMR276W	DSK2	541	563	FALSE	181	188	NPQLQAMG	NL*LQAMG	P182L	Q183*	NA	coding	stop	c(-9.988, NA)	9.988
AACCTACAAAACATGAAATA	neStops	-	chrV	407877	407899	YER124C	DSE1	1165	1187	FALSE	389	396	NLQNMKYG	NL*NMKYG	Q391*	NA	NA	coding	stop	NA	NA
AACCTCAATACAGCTCATTC	neStops	+	chrII	281636	281658	YBR021W	FUR4	194	216	FALSE	65	72	KPQYSSFW	KL*YSSFW	P66L	Q67*	NA	coding	stop	c(-0.895, NA)	0.895
AACCTTTCCAGGCTAATATT	neStops	+	chrII	239276	239298	YBR001C	NTH2	1986	2008	FALSE	662	670	HQILAWKGL	HQILA*KSL	W667*	G669S	NA	coding	stop	c(NA, -5.95)	5.95
AACGACAGGTGCCATGTTCT	neStops	-	chrIV	1177959	1177981	YDR350C	ATP22	194	216	FALSE	65	72	ERQVPCSR	ER*VPCSR	Q67*	NA	NA	coding	stop	NA	NA
AACGACCAAATATCTACCTC	neStops	-	chrXII	333493	333515	YLR096W	KIN2	904	926	FALSE	302	309	PEVDIWSF	PEVDI*SF	W307*	NA	NA	coding	stop	NA	NA
AACGAGACAGTACCAGGATA	neStops	+	chrV	222938	222960	YER035W	EDC2	300	322	FALSE	100	108	KTRQYQDRA	KTR*YQDRA	Q103*	NA	NA	coding	stop	NA	NA
AACGAGGCAGGAAATGAAAA	neStops	-	chrVII	1006660	1006682	YGR257C	MTM1	624	646	FALSE	208	216	ETRQEMKMV	ETR*EMKMV	Q211*	NA	NA	coding	stop	NA	NA
AACGCAAAAAGGACTTATAA	neStops	+	chrIV	1033734	1033756	YDR285W	ZIP1	1299	1321	FALSE	433	441	VTQKGLIMG	VT*KGLIMG	Q435*	NA	NA	coding	stop	NA	NA
AACGCAAAATGGTAGAATCG	neStops	-	chrXIII	95240	95262	YML087C	AIM33	108	130	FALSE	36	44	KTQNGRIVV	KT*NGRIVV	Q38*	NA	NA	coding	stop	NA	NA
AACGCAAGAGCAAAGTGGAC	neStops	+	chrXII	284237	284259	YLR077W	FMP25	366	388	FALSE	122	130	ATQEQSGQD	AT*EQSGQD	Q124*	NA	NA	coding	stop	NA	NA
AACGGACAAGGCACCACCCT	neStops	+	chrX	190202	190224	YJL122W	ALB1	487	509	FALSE	163	170	NGQGTTLG	NG*GTTLG	Q165*	NA	NA	coding	stop	NA	NA
AACGGGCCAACCGTATGCGT	neStops	+	chrVII	232801	232823	YGL144C	ROG1	1685	1707	FALSE	562	569	ANAYGWPV	ANAYG*PV	W567*	NA	NA	coding	stop	NA	NA
AACTACCAAAAGGGCCTCAT	neStops	+	chrXVI	556920	556942	YPR001W	CIT3	544	566	FALSE	182	189	NYQKGLIG	NY*KGLIG	Q184*	NA	NA	coding	stop	NA	NA
AACTATTCGAGAAGCGTCCT	neStops	+	chrIV	695269	695291	YDR122W	KIN1	570	592	FALSE	190	198	RTIREASLG	RTI*EASLG	R193*	NA	NA	coding	stop	NA	NA
AACTCAAATGTTGTCCCGCT	neStops	-	chrXII	158398	158420	YLR004C	THI73	1086	1108	FALSE	362	370	TTQMLSRWG	TT*MLSRWG	Q364*	NA	NA	coding	stop	NA	NA
AACTCAACGGCAGAACCAGT	neStops	-	chrIV	1053276	1053298	YDR295C	HDA2	1350	1372	FALSE	450	458	ETQRQNQLD	ET*WQNQLD	Q452*	R453W	NA	coding	stop	c(NA, -7.067)	7.067
AACTCCAATAGGCAGTATTT	neStops	+	chrVI	30150	30172	YFL051C	YFL051C	369	391	FALSE	123	131	DPNTAYWSS	DPNTAY*SS	W129*	NA	NA	coding	stop	NA	NA
AACTCCACAACCAGCCACTT	neStops	+	chrXIII	161619	161641	YML057W	CMP2	1440	1462	FALSE	480	488	ATPQPATSA	ATL*PATSA	P482L	Q483*	NA	coding	stop	c(-1.537, NA)	1.537
AACTCGATTTAATGATTTGT	neStops	+	chrXII	101255	101277	YLL021W	SPA2	309	331	FALSE	103	111	QTRFNDLLD	QT*FNDLLD	R105*	NA	NA	coding	stop	NA	NA
AACTCGCAAAGTAGGGAAAG	neStops	+	chrXVI	793170	793192	YPR129W	SCD6	484	506	FALSE	162	169	NSQSRERG	NL*SRERG	S163L	Q164*	NA	coding	stop	c(-2.033, NA)	2.033
AACTCTCAAATGGATAAAGA	neStops	-	chrIV	1316998	1317020	YDR422C	SIP1	754	776	FALSE	252	259	NSQMDKEG	NF*MDKEG	S253F	Q254*	NA	coding	stop	c(-0.122, NA)	0.122
AACTCTCAATCCGGTAAGGG	neStops	+	chrXV	524263	524285	YOR108W	LEU9	1237	1259	FALSE	413	420	NSQSGKGG	NF*SGKGG	S414F	Q415*	NA	coding	stop	c(-5.997, NA)	5.997
AACTCTCAGTCTGGTAAAGG	neStops	-	chrXIV	425493	425515	YNL104C	LEU4	1240	1262	FALSE	414	421	NSQSGKGG	NF*SGKGG	S415F	Q416*	NA	coding	stop	c(-5.997, NA)	5.997
AACTCTCCAATTCACGTCCT	neStops	-	chrI	126218	126240	YAL016W	TPD3	1340	1362	FALSE	447	454	AKDVNWRV	AKDVN*KV	W452*	R453K	NA	coding	stop	c(NA, -2.933)	2.933
AACTCTCCATTGAGCAAAGG	neStops	+	chrXII	98135	98157	YLL023C	POM33	680	702	FALSE	227	234	AAFAQWRV	AAFAQ*KV	W232*	R233K	NA	coding	stop	c(NA, -0.676)	0.676
AACTCTCCATTGGACAGAAT	neStops	+	chrVIII	288083	288105	YHR092C	HXT4	707	729	FALSE	236	243	TNSVQWRV	TNSVQ*KV	W241*	R242K	NA	coding	stop	c(NA, -2.882)	2.882
AACTGAACAGCTAAAGGAGT	neStops	-	chrXI	502336	502358	YKR031C	SPO14	4038	4060	FALSE	1346	1354	ATEQLKEWA	ATE*LKEWA	Q1349*	NA	NA	coding	stop	NA	NA
AACTGGCAAGAAAGTGACAC	neStops	-	chrXVI	461098	461120	YPL050C	MNN9	847	869	FALSE	283	290	NWQESDTG	NW*ESDTG	Q285*	NA	NA	coding	stop	NA	NA
AACTGGCCAGAACAACTTAC	neStops	-	chrXVI	813878	813900	YPR139C	LOA1	159	181	FALSE	53	61	LTGQNNLLG	LTG*NNLLG	Q56*	NA	NA	coding	stop	NA	NA
AACTTCAACAAAAACGTGTG	neStops	+	chrXVI	176518	176540	YPL195W	APL5	296	318	FALSE	99	106	KLQQKRVG	KL*QKRVG	Q101*	NA	NA	coding	stop	NA	NA
AACTTCCATGTATCAGACAC	neStops	-	chrXII	1032867	1032889	YLR450W	HMG2	241	263	FALSE	81	88	PVSDTWKL	PVSDT*KL	W86*	NA	NA	coding	stop	NA	NA
AAGAACAACGCATAAAAAGG	neStops	-	chrIV	1517145	1517167	YDR540C	IRC4	509	531	FALSE	170	177	EEQRIKRR	EE*RIKRR	Q172*	NA	NA	coding	stop	NA	NA
AAGAACAGGGTGAAGGTCAA	neStops	+	chrIV	1088815	1088837	YDR312W	SSF2	1235	1257	FALSE	412	419	EEQGEGQG	EE*GEGQG	Q414*	NA	NA	coding	stop	NA	NA
AAGAAGCAAAATCTAAATTT	neStops	-	chrXII	62039	62061	YLL040C	VPS13	1585	1607	FALSE	529	536	KKQNLNLG	KK*NLNLG	Q531*	NA	NA	coding	stop	NA	NA
AAGAAGCAAAGACTGCAACA	neStops	-	chrXVI	448945	448967	YPL058C	PDR12	1411	1433	FALSE	471	478	KKQRLQQG	KK*RLQQG	Q473*	NA	NA	coding	stop	NA	NA
AAGAAGCAGGACGGCGATTT	neStops	+	chrXIV	280942	280964	YNL191W	DUG3	511	533	FALSE	171	178	KKQDGDFG	KK*DGDFG	Q173*	NA	NA	coding	stop	NA	NA
AAGACAAAACTCGTACATTA	neStops	-	chrXIV	633052	633074	YNR002C	ATO2	783	805	FALSE	261	269	TRQNSYIMV	TR*NSYIMV	Q263*	NA	NA	coding	stop	NA	NA
AAGACAAACCAAGAAGGCAA	neStops	-	chrVII	449288	449310	YGL025C	PGD1	648	670	FALSE	216	224	PRQTKKAKA	PR*TKKAKA	Q218*	NA	NA	coding	stop	NA	NA
AAGACAAATGAATTTAGCTA	neStops	-	chrII	129388	129410	YBL047C	EDE1	2631	2653	FALSE	877	885	ERQMNLAMG	ER*MNLAMG	Q879*	NA	NA	coding	stop	NA	NA
AAGACAAGTCTTCGACCAAT	neStops	+	chrVII	373352	373374	YGL071W	AFT1	1341	1363	FALSE	447	455	PRQVFDQLD	PR*VFDQLD	Q449*	NA	NA	coding	stop	NA	NA
AAGACAAGTTAGTTTACTAA	neStops	-	chrXIV	74753	74775	YNL297C	MON2	1809	1831	FALSE	603	611	SRQVSLLRA	SR*VSLLRA	Q605*	NA	NA	coding	stop	NA	NA
AAGACACAATGGGAGGTTTC	neStops	-	chrI	107218	107240	YAL023C	PMT2	1312	1334	FALSE	438	445	KTQWEVSG	KI*WEVSG	T439I	Q440*	NA	coding	stop	c(-3.569, NA)	3.569
AAGACACCAGATACAAGCAC	neStops	+	chrXIII	715386	715408	YMR221C	FMP42	38	60	FALSE	13	20	ACACIWCL	ACACI*YL	W18*	C19Y	NA	coding	stop	c(NA, -10.307)	10.307
AAGACAGAACACCAAAATGT	neStops	+	chrX	250668	250690	YJL095W	BCK1	3414	3436	FALSE	1138	1146	KRQNTKMWG	KR*NTKMWG	Q1140*	NA	NA	coding	stop	NA	NA
AAGACAGCGCTTGTTGCAAG	neStops	+	chrXVI	528140	528162	YPL014W	CIP1	594	616	FALSE	198	206	VRQRLLQEV	VR*CLLQEV	Q200*	R201C	NA	coding	stop	c(NA, -6.967)	6.967
AAGACAGCTATTTATGAATT	neStops	+	chrVIII	473706	473728	YHR184W	SSP1	963	985	FALSE	321	329	TRQLFMNLA	TR*LFMNLA	Q323*	NA	NA	coding	stop	NA	NA
AAGACAGGAAGATGGTGGCG	neStops	+	chrIV	806941	806963	YDR171W	HSP42	321	343	FALSE	107	115	TRQEDGGED	TR*EDGGED	Q109*	NA	NA	coding	stop	NA	NA
AAGACAGTTTAATCGTCTTG	neStops	+	chrXVI	555516	555538	YPL001W	HAT1	912	934	FALSE	304	312	ERQFNRLVE	ER*FNRLVE	Q306*	NA	NA	coding	stop	NA	NA
AAGACCAAAGCACAACGGCA	neStops	-	chrXIV	90707	90729	YNL288W	CAF40	405	427	FALSE	135	143	DLAVVLWSS	DLAVVL*SS	W141*	NA	NA	coding	stop	NA	NA
AAGACCACCTACCGTGAACG	neStops	-	chrV	516262	516284	YER166W	DNF1	3519	3541	FALSE	1173	1181	VLVHGRWSY	VLVHGR*SY	W1179*	NA	NA	coding	stop	NA	NA
AAGACCATAAATATTTCAAA	neStops	+	chrIV	385458	385480	YDL037C	BSC1	108	130	FALSE	36	44	IPLKYLWSL	IPLKYL*SL	W42*	NA	NA	coding	stop	NA	NA
AAGACCATGGTTCTATTTCA	neStops	-	chrII	801464	801486	YBR297W	MAL33	942	964	FALSE	314	322	SLEIEPWSY	SLEIEP*SY	W320*	NA	NA	coding	stop	NA	NA
AAGACGAAAATCTATTATTG	neStops	-	chrX	78116	78138	YJL187C	SWE1	1125	1147	FALSE	375	383	TRRKSIIGA	TR*KSIIGA	R377*	NA	NA	coding	stop	NA	NA
AAGAGACAAGATATGATTAA	neStops	-	chrII	305219	305241	YBR034C	HMT1	736	758	FALSE	246	253	KRQDMING	KR*DMING	Q248*	NA	NA	coding	stop	NA	NA
AAGAGATCAGGTGACCCTTG	neStops	-	chrXVI	44622	44644	YPL263C	KEL3	1863	1885	FALSE	621	629	RRDQVTLEE	RRD*VTLEE	Q624*	NA	NA	coding	stop	NA	NA
AAGAGCAAACGCCAATAGCC	neStops	+	chrI	51511	51533	YAL051W	OAF1	2948	2970	FALSE	983	990	KEQTPIAG	KE*TPIAG	Q985*	NA	NA	coding	stop	NA	NA
AAGAGCAGTGCAAATCAAGA	neStops	+	chrXIII	273350	273372	YMR003W	AIM34	233	255	FALSE	78	85	KEQCKSRG	KE*CKSRG	Q80*	NA	NA	coding	stop	NA	NA
AAGAGCCATCCTGCACCACG	neStops	-	chrIV	370398	370420	YDL047W	SIT4	628	650	FALSE	210	217	PRGAGWLF	PRGAG*LF	W215*	NA	NA	coding	stop	NA	NA
AAGAGTCCCAGGATTTCACA	neStops	+	chrIII	141252	141274	YCR015C	CTO1	897	919	FALSE	299	307	YLVKSWDSL	YLVKS*NSL	W304*	D305N	NA	coding	stop	c(NA, 0.308)	0.308
AAGATCAACATGGGTACTCA	neStops	+	chrXIII	707251	707273	YMR219W	ESC1	119	141	FALSE	40	47	KDQHGYSR	KD*HGYSR	Q42*	NA	NA	coding	stop	numeric(0)	NA
AAGATCAGAACAAATCTCTG	neStops	-	chrXIV	684093	684115	YNR031C	SSK2	1319	1341	FALSE	440	447	EDQNKSLR	ED*NKSLR	Q442*	NA	NA	coding	stop	NA	NA
AAGATTCAACAAAACAAGCA	neStops	-	chrII	294864	294886	YBR028C	YPK3	1117	1139	FALSE	373	380	KIQQNKQG	KI*QNKQG	Q375*	NA	NA	coding	stop	NA	NA
AAGATTTCAAGTTCTCGCAA	neStops	-	chrXVI	583244	583266	YPR011C	YPR011C	777	799	FALSE	259	267	RRFQVLAMG	RRF*VLAMG	Q262*	NA	NA	coding	stop	NA	NA
AAGCAAAAGAAAAGAACGCA	neStops	+	chrVII	391772	391794	YGL060W	YBP2	1708	1730	FALSE	570	577	KQKKRTQG	K*KKRTQG	Q571*	NA	NA	coding	stop	NA	NA
AAGCAAAATAGACAAATCGG	neStops	-	chrXI	465440	465462	YKR014C	YPT52	610	632	FALSE	204	211	KQNRQIGG	K*NRQIGG	Q205*	NA	NA	coding	stop	NA	NA
AAGCAAACAAGGGTGGCCAT	neStops	+	chrXIII	261321	261343	YML005W	TRM12	1101	1123	FALSE	367	375	SSKQGWPLA	SSK*GWPLA	Q370*	NA	NA	coding	stop	NA	NA
AAGCAAACATTAGAAGAAGA	neStops	-	chrXIII	117766	117788	YML075C	HMG1	1111	1133	FALSE	371	378	KQTLEEDG	K*ILEEDG	Q372*	T373I	NA	coding	stop	c(NA, -3.569)	3.569
AAGCAAAGAAATGTGAATGG	neStops	+	chrVII	378566	378588	YGL066W	SGF73	958	980	FALSE	320	327	KQRNVNGG	K*RNVNGG	Q321*	NA	NA	coding	stop	NA	NA
AAGCAAAGTTGGGTGAAGTA	neStops	+	chrV	296301	296323	YER069W	ARG5,6	892	914	FALSE	298	305	KQSWVKYG	K*SWVKYG	Q299*	NA	NA	coding	stop	NA	NA
AAGCAAATAAAATGCTACTG	neStops	-	chrXIV	590406	590428	YNL023C	FAP1	733	755	FALSE	245	252	KQIKCYCG	K*IKCYCG	Q246*	NA	NA	coding	stop	NA	NA
AAGCAACTGGTAGGAGGATA	neStops	-	chrVIII	334765	334787	YHR112C	YHR112C	877	899	FALSE	293	300	KQLVGGYG	K*LVGGYG	Q294*	NA	NA	coding	stop	NA	NA
AAGCAAGAATCGGCGTTAAC	neStops	+	chrVII	986041	986063	YGR248W	SOL4	70	92	FALSE	24	31	KQESALTG	K*ESALTG	Q25*	NA	NA	coding	stop	NA	NA
AAGCAAGATAGATTGGTGGA	neStops	+	chrXII	126992	127014	YLL012W	YEH1	1459	1481	FALSE	487	494	KQDRLVDG	K*DRLVDG	Q488*	NA	NA	coding	stop	NA	NA
AAGCAATACAGCATGCCAGG	neStops	+	chrXIII	668020	668042	YMR202W	ERG2	484	506	FALSE	162	169	KQYSMPGG	K*YSMPGG	Q163*	NA	NA	coding	stop	NA	NA
AAGCAATCATTTGGCCAAAT	neStops	-	chrV	481689	481711	YER155C	BEM2	1138	1160	FALSE	380	387	KQSFGQMG	K*LFGQMG	Q381*	S382L	NA	coding	stop	c(NA, -1.717)	1.717
AAGCAATCCGACGACGCTAC	neStops	+	chrXI	261501	261523	YKL096W	CWP1	370	392	FALSE	124	131	KQSDDATG	K*FDDATG	Q125*	S126F	NA	coding	stop	c(NA, -3.2)	3.2
AAGCAATGGTTTATAGCTCA	neStops	+	chrXV	804791	804813	YOR253W	NAT5	415	437	FALSE	139	146	KQWFIAHG	K*WFIAHG	Q140*	NA	NA	coding	stop	NA	NA
AAGCAATTTCACATTCGTAA	neStops	-	chrXV	469741	469763	YOR076C	SKI7	1858	1880	FALSE	620	627	KQFHIRKG	K*FHIRKG	Q621*	NA	NA	coding	stop	NA	NA
AAGCACAAATCAAAAAACAT	neStops	-	chrXIII	206587	206609	YML035C	AMD1	2252	2274	FALSE	751	758	EAQIKKHW	EV*IKKHW	A752V	Q753*	NA	coding	stop	c(-1.744, NA)	1.744
AAGCAGACTTCCAATATTGA	neStops	-	chrXIV	300234	300256	YNL180C	RHO5	394	416	FALSE	132	139	KQTSNIEG	K*ISNIEG	Q133*	T134I	NA	coding	stop	c(NA, -1.523)	1.523
AAGCAGATGAAGCATAATTC	neStops	-	chrVII	469579	469601	YGL013C	PDR1	2698	2720	FALSE	900	907	KQMKHNSG	K*MKHNSG	Q901*	NA	NA	coding	stop	NA	NA
AAGCAGCAACGTTGTGTGAT	neStops	-	chrVII	624392	624414	YGR067C	YGR067C	373	395	FALSE	125	132	KQQRCVIG	K**RCVIG	Q126*	Q127*	NA	coding	stop	c(NA, NA)	NA
AAGCAGCAAGCTGCACCCGG	neStops	-	chrXIV	439657	439679	YNL098C	RAS2	892	914	FALSE	298	305	KQQAAPGG	K**AAPGG	Q299*	Q300*	NA	coding	stop	c(NA, NA)	NA
AAGCAGCAAGGTTATGAGAT	neStops	+	chrVI	216033	216055	YFR030W	MET10	2722	2744	FALSE	908	915	KQQGYEIG	K**GYEIG	Q909*	Q910*	NA	coding	stop	c(NA, NA)	NA
AAGCAGCACATCTTACAGAT	neStops	-	chrXV	747850	747872	YOR216C	RUD3	1108	1130	FALSE	370	377	KQHILQIG	K*YILQIG	Q371*	H372Y	NA	coding	stop	c(NA, -1.678)	1.678
AAGCAGCCTTCAATATTGGT	neStops	-	chrXV	857968	857990	YOR290C	SNF2	2269	2291	FALSE	757	764	KQPSILVG	K*FSILVG	Q758*	P759F	NA	coding	stop	c(NA, -10.993)	10.993
AAGCAGCTGTTATTCCACAT	neStops	-	chrIV	1000111	1000133	YDR266C	HEL2	1891	1913	FALSE	631	638	KQLLFHIG	K*LLFHIG	Q632*	NA	NA	coding	stop	NA	NA
AAGCAGGAAACTGTCACAGA	neStops	+	chrXI	572473	572495	YKR069W	MET1	862	884	FALSE	288	295	KQETVTEG	K*ETVTEG	Q289*	NA	NA	coding	stop	NA	NA
AAGCAGGATACTCTGAATAG	neStops	-	chrXII	884612	884634	YLR382C	NAM2	118	140	FALSE	40	47	KQDTLNSG	K*DTLNSG	Q41*	NA	NA	coding	stop	NA	NA
AAGCAGGATGGTATGCTGTG	neStops	-	chrVI	245003	245025	YFR047C	BNA6	142	164	FALSE	48	55	KQDGMLCG	K*DGMLCG	Q49*	NA	NA	coding	stop	NA	NA
AAGCAGGGCTCTCCGAGCAG	neStops	-	chrXIII	205038	205060	YML037C	YML037C	349	371	FALSE	117	124	KQGSPSRG	K*GSPSRG	Q118*	NA	NA	coding	stop	NA	NA
AAGCATCAGCTCGTGAAAGT	neStops	-	chrXV	996363	996385	YOR351C	MEK1	127	149	FALSE	43	50	KHQLVKVG	KY*LVKVG	H44Y	Q45*	NA	coding	stop	c(-2.989, NA)	2.989
AAGCCAGGAATAGAGGATCA	neStops	-	chrXVI	913616	913638	YPR189W	SKI3	953	975	FALSE	318	325	AMILYSWL	AMILYS*L	W324*	NA	NA	coding	stop	NA	NA
AAGCCATCTTCCTTCTGCTA	neStops	-	chrIX	209201	209223	YIL082W-A	NA	3566	3588	FALSE	1189	1196	PIAEGRWL	PIAEGK*L	R1194K	W1195*	NA	coding	stop	c(-1.264, NA)	1.264
AAGCCCAAATTATCCTACGT	neStops	+	chrIV	240977	240999	YDL124W	YDL124W	719	741	FALSE	240	247	EAQIILRW	EV*IILRW	A241V	Q242*	NA	coding	stop	c(-2.888, NA)	2.888
AAGCCCAATTTACAACAACG	neStops	+	chrIV	1429232	1429254	YDR488C	PAC11	1536	1558	FALSE	512	520	RLVVVNWAF	RLVVVN*TF	W518*	A519T	NA	coding	stop	c(NA, 0.575)	0.575
AAGCCCCCATATATCGATCT	neStops	+	chrXIV	56896	56918	YNL307C	MCK1	656	678	FALSE	219	226	TQIDIWGL	TQIDI*KL	W224*	G225K	NA	coding	stop	c(NA, -4.262)	4.262
AAGCGAAAATCGCTTATTAC	neStops	-	chrXIV	72502	72524	YNL297C	MON2	4060	4082	FALSE	1354	1361	KRKSLITG	K*KSLITG	R1355*	NA	NA	coding	stop	NA	NA
AAGCGACATCGTCGAAGAAA	neStops	-	chrXIII	812473	812495	YMR273C	ZDS1	1486	1508	FALSE	496	503	KRHRRRNG	K*YRRRNG	R497*	H498Y	NA	coding	stop	c(NA, -2.005)	2.005
AAGCTCAATTACACCAGAAG	neStops	+	chrXII	555752	555774	YLR206W	ENT2	1175	1197	FALSE	392	399	EAQLHQKR	EV*LHQKR	A393V	Q394*	NA	coding	stop	c(-0.454, NA)	0.454
AAGCTCCAACTTCAATTATT	neStops	-	chrVIII	500059	500081	YHR201C	PPX1	1063	1085	FALSE	355	362	KLQLQLFG	KF*LQLFG	L356F	Q357*	NA	coding	stop	c(-3.078, NA)	3.078
AAGCTCGAGAAAGGGCATGG	neStops	+	chrX	499630	499652	YJR035W	RAD26	2276	2298	FALSE	759	766	QARERAWR	QV*ERAWR	A760V	R761*	NA	coding	stop	c(-4, NA)	4
AAGGAACAGGCCAAGTTCCA	neStops	+	chrIV	766246	766268	YDR152W	GIR2	541	563	FALSE	181	188	KEQAKFHG	KE*AKFHG	Q183*	NA	NA	coding	stop	NA	NA
AAGGAACCAAAGACAAAGCA	neStops	-	chrXV	553622	553644	YOR123C	LEO1	927	949	FALSE	309	317	RRNQRQSKG	RRN*RQSKG	Q312*	NA	NA	coding	stop	NA	NA
AAGGACACAAAGAACATGGC	neStops	-	chrXII	308102	308124	YLR087C	CSF1	7608	7630	FALSE	2536	2544	LRTQRTWLA	LRI*RTWLA	T2538I	Q2539*	NA	coding	stop	c(0.072, NA)	0.072
AAGGACCAAGATGCTAGTGC	neStops	+	chrIV	1258969	1258991	YDR392W	SPT3	274	296	FALSE	92	99	KDQDASAG	KD*DASAG	Q94*	NA	NA	coding	stop	NA	NA
AAGGAGCAGATCGAGAAAAT	neStops	+	chrXIII	903214	903236	YMR315W	YMR315W	415	437	FALSE	139	146	KEQIEKIG	KE*IEKIG	Q141*	NA	NA	coding	stop	NA	NA
AAGGATCAATGCTTGACTAA	neStops	+	chrII	538434	538456	YBR148W	YSW1	559	581	FALSE	187	194	KDQCLTKG	KD*CLTKG	Q189*	NA	NA	coding	stop	NA	NA
AAGGCAAAACCAATACAAAT	neStops	-	chrVI	64296	64318	YFL034C-A	RPL22B	294	316	FALSE	98	106	IRQNQYKLV	IR*NQYKLV	Q100*	NA	NA	coding	stop	NA	NA
AAGGCAACTACAGTTACATA	neStops	-	chrXIV	496939	496961	YNL068C	FKH2	1329	1351	FALSE	443	451	ARQLQLHMA	AR*LQLHMA	Q445*	NA	NA	coding	stop	NA	NA
AAGGCAATATATTCAAGAAG	neStops	-	chrXIII	604956	604978	YMR171C	EAR1	543	565	FALSE	181	189	TRQYIQEEG	TR*YIQEEG	Q183*	NA	NA	coding	stop	NA	NA
AAGGCAATTGAATGAGGGGC	neStops	-	chrXIII	681221	681243	YMR207C	HFA1	2322	2344	FALSE	774	782	PRQLNEGLG	PR*LNEGLG	Q776*	NA	NA	coding	stop	NA	NA
AAGGCAATTGGAAAAGGTTA	neStops	+	chrVII	284942	284964	YGL119W	COQ8	501	523	FALSE	167	175	QRQLEKVMA	QR*LEKVMA	Q169*	NA	NA	coding	stop	NA	NA
AAGGCACAAGACGAGAATGA	neStops	-	chrII	284528	284550	YBR023C	CHS3	3376	3398	FALSE	1126	1133	KAQDENEG	KV*DENEG	A1127V	Q1128*	NA	coding	stop	c(-2.392, NA)	2.392
AAGGCAGTACACGGCATTAT	neStops	+	chrXIII	39281	39303	YML116W	ATR1	1086	1108	FALSE	362	370	IRQYTALWA	IR*YTALWA	Q364*	NA	NA	coding	stop	NA	NA
AAGGCCCAAATATCGGATGC	neStops	-	chrXI	129947	129969	YKL171W	NNK1	2473	2495	FALSE	825	832	PASDIWAL	PASDI*TL	W830*	A831T	NA	coding	stop	c(NA, -4)	4
AAGGCCCACGTTGAGGGTGA	neStops	-	chrII	299630	299652	YBR030W	RKM3	1339	1361	FALSE	447	454	PSPSTWAL	PSPST*TL	W452*	A453T	NA	coding	stop	c(NA, -3.097)	3.097
AAGGCGACGCATCTCCACCA	neStops	-	chrII	655956	655978	YBR216C	YBP1	1623	1645	FALSE	541	549	SRRRISTKD	SR*CISTKD	R543*	R544C	NA	coding	stop	c(NA, -1.305)	1.305
AAGGCGCAAAGACCAATCAC	neStops	-	chrVII	787529	787551	YGR148C	RPL24B	229	251	FALSE	77	84	KAQRPITG	KV*RPITG	A78V	Q79*	NA	coding	stop	c(-1.963, NA)	1.963
AAGGCTACAGGACGCTCCAG	neStops	-	chrIII	67550	67572	YCL030C	HIS4	762	784	FALSE	254	262	QRLQDAPEE	QRL*DAPEE	Q257*	NA	NA	coding	stop	NA	NA
AAGGGCAAAATGTGGCCGCG	neStops	+	chrVII	676649	676671	YGR096W	TPC1	29	51	FALSE	10	17	KGQNVAAW	KG*NVAAW	Q12*	NA	NA	coding	stop	NA	NA
AAGGGTGCAAGCGGTAAACT	neStops	-	chrXV	985946	985968	YOR347C	PYK2	495	517	FALSE	165	173	LRVQAVNSG	LRV*AVNSG	Q168*	NA	NA	coding	stop	NA	NA
AAGTACAGGAGTATGAAGCC	neStops	-	chrXIII	836142	836164	YMR283C	RIT1	704	726	FALSE	235	242	EVQEYEAW	EV*EYEAW	Q237*	NA	NA	coding	stop	NA	NA
AAGTCAAAAGGCCATGTTTA	neStops	+	chrII	796307	796329	YBR295W	PCA1	3459	3481	FALSE	1153	1161	VSQKAMFRV	VS*KAMFRV	Q1155*	NA	NA	coding	stop	NA	NA
AAGTCAATGTAATATTAAGG	neStops	-	chrXVI	220856	220878	YPL174C	NIP100	1896	1918	FALSE	632	640	ESQCNIKEG	ES*CNIKEG	Q634*	NA	NA	coding	stop	NA	NA
AAGTCACAAAGTAAGTACGA	neStops	-	chrIV	749235	749257	YDR146C	SWI5	1486	1508	FALSE	496	503	KSQSKYEG	KL*SKYEG	S497L	Q498*	NA	coding	stop	c(-3.707, NA)	3.707
AAGTCACAAGACGGTGGTCA	neStops	-	chrXV	741175	741197	YOR211C	MGM1	373	395	FALSE	125	132	KSQDGGHG	KL*DGGHG	S126L	Q127*	NA	coding	stop	c(-3.541, NA)	3.541
AAGTCAGTACGATGCATCCT	neStops	+	chrX	85162	85184	YJL183W	MNN11	1095	1117	FALSE	365	373	ASQYDASLD	AS*YDASLD	Q367*	NA	NA	coding	stop	NA	NA
AAGTCCACGGTGTCGATAAA	neStops	+	chrXIV	363008	363030	YNL139C	THO2	2688	2710	FALSE	896	904	FHLSTPWTF	FHLSTP*TF	W902*	NA	NA	coding	stop	NA	NA
AAGTCCATCCAGACCACCAG	neStops	-	chrIX	94629	94651	YIL136W	OM45	1011	1033	FALSE	337	345	SHWWSGWTS	SHWWSG*TS	W343*	NA	NA	coding	stop	NA	NA
AAGTCGAGCGGAATCAAAGC	neStops	-	chrI	56197	56219	YAL047C	SPC72	639	661	FALSE	213	221	KSRAESKQD	KS*AESKQD	R215*	NA	NA	coding	stop	NA	NA
AAGTCGAGGTACCCCAATGA	neStops	-	chrXIII	213234	213256	YML032C	RAD52	675	697	FALSE	225	233	VSRGTPMMA	VS*GTPMMA	R227*	NA	NA	coding	stop	NA	NA
AAGTGCAAGAATTACTATCG	neStops	-	chrVII	1008424	1008446	YGR258C	RAD2	2321	2343	FALSE	774	781	EVQELLSR	EV*ELLSR	Q776*	NA	NA	coding	stop	NA	NA
AAGTGGTCAGGATGAAGTTG	neStops	-	chrXIII	257486	257508	YML006C	GIS4	909	931	FALSE	303	311	ESGQDEVED	ESG*DEVED	Q306*	NA	NA	coding	stop	NA	NA
AAGTGTACAGAAGGCATGGC	neStops	-	chrXIII	642417	642439	YMR190C	SGS1	2820	2842	FALSE	940	948	LSVQKAWQA	LSV*KAWQA	Q943*	NA	NA	coding	stop	NA	NA
AAGTTCAAGGTGGGTATGGT	neStops	-	chrV	385556	385578	YER111C	SWI4	299	321	FALSE	100	107	KVQGGYGR	KV*GGYGR	Q102*	NA	NA	coding	stop	NA	NA
AAGTTCCAACAAGAATCACA	neStops	+	chrXIII	384419	384441	YMR054W	STV1	1117	1139	FALSE	373	380	KFQQESQG	KF*QESQG	Q375*	NA	NA	coding	stop	NA	NA
AAGTTTCAAACTCCAACCTA	neStops	+	chrIV	895587	895609	YDR216W	ADR1	553	575	FALSE	185	192	KFQTPTYG	KF*TPTYG	Q187*	NA	NA	coding	stop	NA	NA
AAGTTTGCCAAATAAATGCT	neStops	-	chrX	574370	574392	YJR075W	HOC1	390	412	FALSE	130	138	FPAFIWQTW	FPAFI*QTW	W135*	NA	NA	coding	stop	NA	NA
AATAAAACAAATAAGTGACA	neStops	-	chrIV	1203208	1203230	YDR364C	CDC40	981	1003	FALSE	327	335	PIKQISDTA	PIK*ISDTA	Q330*	NA	NA	coding	stop	NA	NA
AATAATCAACAGCAAGGGTC	neStops	+	chrXI	311210	311232	YKL068W	NUP100	1012	1034	FALSE	338	345	NNQQQGSG	NN*QQGSG	Q340*	NA	NA	coding	stop	NA	NA
AATAATCAACAGTACCAAGG	neStops	+	chrIII	70882	70904	YCL028W	RNQ1	733	755	FALSE	245	252	NNQQYQGG	NN*QYQGG	Q247*	NA	NA	coding	stop	NA	NA
AATAATCCCAGATATCTAAC	neStops	+	chrXV	568187	568209	YOR129C	AFI1	1350	1372	FALSE	450	458	YQLDIWDYY	YQLDI*NYY	W455*	D456N	NA	coding	stop	c(NA, -4.667)	4.667
AATACAAAGTAATGAATCAG	neStops	-	chrIV	902532	902554	YDR217C	RAD9	927	949	FALSE	309	317	IIQSNESEE	II*SNESEE	Q311*	NA	NA	coding	stop	NA	NA
AATACAACAGTTCAGCGATG	neStops	-	chrX	375690	375712	YJL038C	LOH1	63	85	FALSE	21	29	TIQQFSDAG	TI**FSDAG	Q23*	Q24*	NA	coding	stop	c(NA, NA)	NA
AATACAAGGTTATCCCATAC	neStops	+	chrIII	179678	179700	YCR032W	BPH1	159	181	FALSE	53	61	IIQGYPIQD	II*GYPIQD	Q55*	NA	NA	coding	stop	NA	NA
AATACAAGTAGAAGAAGATG	neStops	-	chrXIV	132239	132261	YNL271C	BNI1	3123	3145	FALSE	1041	1049	EIQVEEDGE	EI*VEEDGE	Q1043*	NA	NA	coding	stop	NA	NA
AATACAAGTTACAACGCAGA	neStops	-	chrX	118531	118553	YJL160C	PIR5	273	295	FALSE	91	99	QIQVTTQKV	QI*VTTQKV	Q93*	NA	NA	coding	stop	NA	NA
AATACAGAATTATCTGTATA	neStops	+	chrIV	700578	700600	YDR124W	YDR124W	264	286	FALSE	88	96	LIQNYLYTA	LI*NYLYTA	Q90*	NA	NA	coding	stop	NA	NA
AATACAGATTCCTGTTTCTA	neStops	+	chrXVI	801675	801697	YPR135W	CTF4	2442	2464	FALSE	814	822	EIQIPVSMA	EI*IPVSMA	Q816*	NA	NA	coding	stop	NA	NA
AATACAGGTGAATGATAAAT	neStops	-	chrXV	761859	761881	YOR226C	ISU2	204	226	FALSE	68	76	QIQVNDKSG	QI*VNDKSG	Q70*	NA	NA	coding	stop	NA	NA
AATACCCGAGGAAATAGGCG	neStops	-	chrVIII	137191	137213	YHR016C	YSC84	1075	1097	FALSE	359	366	NTRGNRRG	NI*GNRRG	T360I	R361*	NA	coding	stop	c(-0.808, NA)	0.808
AATACGACAAAGTGCGCACT	neStops	-	chrIV	408873	408895	YDL024C	DIA3	963	985	FALSE	321	329	LIRQSAHLD	LI**SAHLD	R323*	Q324*	NA	coding	stop	c(NA, NA)	NA
AATACTCCATTCACCTGGAT	neStops	+	chrVIII	197518	197540	YHR046C	INM1	746	768	FALSE	249	256	ANPGEWSI	ANPGE*NI	W254*	S255N	NA	coding	stop	c(NA, 1.056)	1.056
AATAGATCAGTATAATGCGC	neStops	-	chrII	742363	742385	YBR269C	SDH8	192	214	FALSE	64	72	AIDQYNAQA	AID*YNAQA	Q67*	NA	NA	coding	stop	NA	NA
AATAGCACAATCACAAACAA	neStops	+	chrVIII	42399	42421	YHL030W	ECM29	2316	2338	FALSE	772	780	KIAQSQTMA	KIV*SQTMA	A774V	Q775*	NA	coding	stop	c(0.396, NA)	0.396
AATATACAACTAAGCGACAA	neStops	-	chrXIII	813433	813455	YMR273C	ZDS1	526	548	FALSE	176	183	NIQLSDNG	NI*LSDNG	Q178*	NA	NA	coding	stop	NA	NA
AATATACCAACAGTCTGTTA	neStops	+	chrII	387023	387045	YBR074W	PFF1	738	760	FALSE	246	254	RIYQQSVKE	RIY*QSVKE	Q249*	NA	NA	coding	stop	NA	NA
AATATGCAAAGGTTCATAAA	neStops	+	chrIV	950761	950783	YDR244W	PEX5	199	221	FALSE	67	74	NMQRFING	NM*RFING	Q69*	NA	NA	coding	stop	NA	NA
AATATTCAAGACTCTCAAAG	neStops	+	chrIX	87607	87629	YIL140W	AXL2	2242	2264	FALSE	748	755	NIQDSQSG	NI*DSQSG	Q750*	NA	NA	coding	stop	NA	NA
AATCAAAAAAACTCACACAC	neStops	+	chrVIII	332525	332547	YHR110W	ERP5	244	266	FALSE	82	89	NQKNSHTG	N*KNSHTG	Q83*	NA	NA	coding	stop	NA	NA
AATCAAAACAATAACAATGA	neStops	+	chrXV	515985	516007	YOR101W	RAS1	742	764	FALSE	248	255	NQNNNNEG	N*NNNNEG	Q249*	NA	NA	coding	stop	NA	NA
AATCAAAATCAAAATCAGAA	neStops	-	chrXVI	650787	650809	YPR042C	PUF2	2854	2876	FALSE	952	959	NQNQNQNG	N*NQNQNG	Q953*	NA	NA	coding	stop	NA	NA
AATCAAAATGTACAACTCAA	neStops	+	chrX	534978	535000	YJR053W	BFA1	952	974	FALSE	318	325	NQNVQLNG	N*NVQLNG	Q319*	NA	NA	coding	stop	NA	NA
AATCAAACAAGATCACCAAA	neStops	-	chrX	41643	41665	YJL207C	LAA1	5769	5791	FALSE	1923	1931	VIKQDHQKA	VIK*DHQKA	Q1926*	NA	NA	coding	stop	NA	NA
AATCAAAGATCTCTTTCATC	neStops	-	chrXIII	827272	827294	YMR280C	CAT8	4036	4058	FALSE	1346	1353	NQRSLSSG	N*RSLSSG	Q1347*	NA	NA	coding	stop	NA	NA
AATCAACATAACAGTAGTAG	neStops	-	chrVII	626681	626703	YGR068C	ART5	382	404	FALSE	128	135	NQHNSSSG	N*YNSSSG	Q129*	H130Y	NA	coding	stop	c(NA, -0.584)	0.584
AATCAAGAAAGGAAGAACCA	neStops	+	chrIV	1011076	1011098	YDR273W	DON1	901	923	FALSE	301	308	NQERKNQG	N*ERKNQG	Q302*	NA	NA	coding	stop	NA	NA
AATCAAGCAAGGTGACCAAG	neStops	-	chrIX	291015	291037	YIL033C	BCY1	633	655	FALSE	211	219	IIKQGDQGD	IIK*GDQGD	Q214*	NA	NA	coding	stop	NA	NA
AATCAAGCTACTTTAATTAA	neStops	-	chrV	392958	392980	YER114C	BOI2	733	755	FALSE	245	252	NQATLING	N*VTLING	Q246*	A247V	NA	coding	stop	c(NA, -0.436)	0.436
AATCAAGGTTTGCTGTTGGC	neStops	-	chrXI	351849	351871	YKL046C	DCW1	754	776	FALSE	252	259	NQGLLLAG	N*GLLLAG	Q253*	NA	NA	coding	stop	NA	NA
AATCAATATTACTACGTTTA	neStops	+	chrVII	656038	656060	YGR088W	CTT1	1405	1427	FALSE	469	476	NQYYYVYG	N*YYYVYG	Q470*	NA	NA	coding	stop	NA	NA
AATCAATCACCACTGGGTGC	neStops	-	chrVIII	140792	140814	YHR018C	ARG4	589	611	FALSE	197	204	NQSPLGAG	N*LPLGAG	Q198*	S199L	NA	coding	stop	c(NA, -0.395)	0.395
AATCAATCATCAGGCGAAGC	neStops	+	chrXV	534135	534157	YOR113W	AZF1	61	83	FALSE	21	28	NQSSGEAG	N*LSGEAG	Q22*	S23L	NA	coding	stop	c(NA, -1.145)	1.145
AATCAATTCAAAGGACCTGA	neStops	-	chrXII	402873	402895	YLR130C	ZRT2	1168	1190	FALSE	390	397	NQFKGPDG	N*FKGPDG	Q391*	NA	NA	coding	stop	NA	NA
AATCACAAATGAATGAAAAT	neStops	+	chrV	255275	255297	YER051W	JHD1	620	642	FALSE	207	214	QSQMNENW	QL*MNENW	S208L	Q209*	NA	coding	stop	c(-4.129, NA)	4.129
AATCACAAATTTGTAAACCT	neStops	+	chrVII	1029660	1029682	YGR270W	YTA7	2291	2313	FALSE	764	771	ESQICKPR	EL*ICKPR	S765L	Q766*	NA	coding	stop	c(-3.733, NA)	3.733
AATCACAATGTCATGATAAT	neStops	-	chrX	441669	441691	YJR003C	MRX12	863	885	FALSE	288	295	KSQCHDNW	KL*CHDNW	S289L	Q290*	NA	coding	stop	c(-0.078, NA)	0.078
AATCACAGGAGCAACAGCGA	neStops	+	chrII	498061	498083	YBR131W	CCZ1	899	921	FALSE	300	307	ESQEQQRR	EL*EQQRR	S301L	Q302*	NA	coding	stop	c(-0.389, NA)	0.389
AATCACAGGCTTTAAGTTGC	neStops	-	chrVII	886508	886530	YGR194C	XKS1	1346	1368	FALSE	449	456	ESQALSCR	EL*ALSCR	S450L	Q451*	NA	coding	stop	c(-5.545, NA)	5.545
AATCAGAGAACGGAAGCACT	neStops	+	chrXIV	485257	485279	YNL076W	MKS1	1702	1724	FALSE	568	575	NQRTEALG	N*RTEALG	Q569*	NA	NA	coding	stop	NA	NA
AATCAGTCTGTCATGAACTC	neStops	+	chrIV	566080	566102	YDR057W	YOS9	154	176	FALSE	52	59	NQSVMNSG	N*FVMNSG	Q53*	S54F	NA	coding	stop	c(NA, -3.043)	3.043
AATCATCAGCAAACGCAACA	neStops	+	chrXV	870421	870443	YOR296W	YOR296W	220	242	FALSE	74	81	NHQQTQHG	NY*QTQHG	H75Y	Q76*	NA	coding	stop	c(-0.408, NA)	0.408
AATCATCAGCATTCAAAATC	neStops	+	chrXVI	573690	573712	YPR008W	HAA1	673	695	FALSE	225	232	NHQHSKSG	NY*HSKSG	H226Y	Q227*	NA	coding	stop	c(-0.55, NA)	0.55
AATCATGCAGCTGCAAAATT	neStops	+	chrIV	961738	961760	YDR251W	PAM1	1125	1147	FALSE	375	383	KIMQLQNSE	KIM*LQNSE	Q378*	NA	NA	coding	stop	NA	NA
AATCATTCAATTCGTGGTAA	neStops	-	chrXIII	683495	683517	YMR207C	HFA1	48	70	FALSE	16	24	KIIQFVVMA	KII*FVVMA	Q19*	NA	NA	coding	stop	NA	NA
AATCCAATTAGTCGTCACCA	neStops	-	chrXVI	97992	98014	YPL240C	HSP82	612	634	FALSE	204	212	PIQLVVTKE	PI*LVVTKE	Q206*	NA	NA	coding	stop	NA	NA
AATCCAATTGGTTATTCAAA	neStops	+	chrXIV	395791	395813	YNL123W	NMA111	1107	1129	FALSE	369	377	EIQLVIQRG	EI*LVIQRG	Q371*	NA	NA	coding	stop	NA	NA
AATCCACAAGGAGGAAAGAC	neStops	-	chrIV	643620	643642	YDR097C	MSH6	196	218	FALSE	66	73	NPQGGKTG	NL*GGKTG	P67L	Q68*	NA	coding	stop	c(-1, NA)	1
AATCCACAAGTTGATAACCA	neStops	-	chrIV	418285	418307	YDL019C	OSH2	3208	3230	FALSE	1070	1077	NPQVDNHG	NL*VDNHG	P1071L	Q1072*	NA	coding	stop	c(-9.986, NA)	9.986
AATCCACATTAACAATTCAA	neStops	-	chrXV	773898	773920	YOR231W	MKK1	1298	1320	FALSE	433	440	PFELLMWI	PFELLI*I	M438I	W439*	NA	coding	stop	c(-1.826, NA)	1.826
AATCCAGATTAAATTTATGA	neStops	+	chrV	398636	398658	YER118C	SHO1	398	420	FALSE	133	140	SIINLIWI	SIINLI*I	W139*	NA	NA	coding	stop	NA	NA
AATCCAGTCGTTCCCCCATC	neStops	+	chrXV	647885	647907	YOR166C	SWT1	596	618	FALSE	199	206	ARWGNDWI	ARWGND*I	W205*	NA	NA	coding	stop	NA	NA
AATCCATACATTGTCTCCAA	neStops	-	chrX	22367	22389	YJL218W	YJL218W	395	417	FALSE	132	139	TIGDNVWI	TIGDNV*I	W138*	NA	NA	coding	stop	NA	NA
AATCCATTGTGCAACTTCTT	neStops	-	chrX	706786	706808	YJR148W	BAT2	1043	1065	FALSE	348	355	AKEVAQWI	AKEVAQ*I	W354*	NA	NA	coding	stop	NA	NA
AATCCCAAATTAAGCTGCCA	neStops	+	chrIV	1259102	1259124	YDR392W	SPT3	407	429	FALSE	136	143	KSQIKLPW	KF*IKLPW	S137F	Q138*	NA	coding	stop	c(-4.435, NA)	4.435
AATCCCAATTTAAAGGAGAA	neStops	+	chrVII	909610	909632	YGR205W	TDA10	398	420	FALSE	133	140	KSQFKGEG	KF*FKGEG	S134F	Q135*	NA	coding	stop	c(-5.4, NA)	5.4
AATCCGCAGTGTCTCCACTG	neStops	+	chrXVI	647500	647522	YPR040W	TIP41	196	218	FALSE	66	73	NPQCLHCG	NL*CLHCG	P67L	Q68*	NA	coding	stop	c(-8.325, NA)	8.325
AATCGAACACCAATTGGAGT	neStops	-	chrXVI	346668	346690	YPL109C	YPL109C	700	722	FALSE	234	241	NRTPIGVG	N*IPIGVG	R235*	T236I	NA	coding	stop	c(NA, -2.203)	2.203
AATCGAGAAATGGACAAGAA	neStops	+	chrVI	171035	171057	YFR013W	IOC3	1114	1136	FALSE	372	379	NREMDKNG	N*EMDKNG	R373*	NA	NA	coding	stop	NA	NA
AATCGATCAACGATTGGATG	neStops	-	chrIII	27107	27129	YCL056C	PEX34	231	253	FALSE	77	85	KIDQRLDGE	KID*RLDGE	Q80*	NA	NA	coding	stop	NA	NA
AATCGCCAGTGCTACGTGAA	neStops	-	chrIV	960099	960121	YDR250C	YDR250C	241	263	FALSE	81	88	NRQCYVNG	NC*CYVNG	R82C	Q83*	NA	coding	stop	c(-8, NA)	8
AATCGTTCAAATAGAGAAAA	neStops	-	chrVIII	264990	265012	YHR080C	LAM4	1827	1849	FALSE	609	617	TIVQIEKRA	TIV*IEKRA	Q612*	NA	NA	coding	stop	NA	NA
AATCTCAAGCGAAAAACAGA	neStops	+	chrIX	39653	39675	YIL161W	YIL161W	221	243	FALSE	74	81	KSQAKNRR	KF*AKNRR	S75F	Q76*	NA	coding	stop	c(-2.767, NA)	2.767
AATCTCCAAAACTTTGGCAG	neStops	+	chrX	310135	310157	YJL070C	YJL070C	481	503	FALSE	161	168	PLPKFWRF	PLPKF*KF	W166*	R167K	NA	coding	stop	c(NA, 1.06)	1.06
AATCTCGAAGGAATCACAAA	neStops	-	chrIV	643424	643446	YDR097C	MSH6	392	414	FALSE	131	138	QSRRNHKR	QF*RNHKR	S132F	R133*	NA	coding	stop	c(-2.861, NA)	2.861
AATCTGCAATACTATTACCT	neStops	+	chrVII	460706	460728	YGL017W	ATE1	853	875	FALSE	285	292	NLQYYYLG	NL*YYYLG	Q287*	NA	NA	coding	stop	NA	NA
AATGAACCATATGTTCCTTG	neStops	+	chrVII	623338	623360	YGR067C	YGR067C	1427	1449	FALSE	476	483	TTRNIWFI	TTRNI*FI	W481*	NA	NA	coding	stop	NA	NA
AATGAATCAAGACTCTACGA	neStops	+	chrVII	930731	930753	YGR217W	CCH1	6036	6058	FALSE	2012	2020	RMNQDSTME	RMN*DSTME	Q2015*	NA	NA	coding	stop	NA	NA
AATGACCCAAGTTGGATTGT	neStops	+	chrIII	146405	146427	YCR017C	CWH43	1208	1230	FALSE	403	410	TNNPTWVI	TNNPT*II	W408*	V409I	NA	coding	stop	c(NA, -0.983)	0.983
AATGAGCAAAAAGATAACTT	neStops	+	chrII	573253	573275	YBR168W	PEX32	883	905	FALSE	295	302	NEQKDNFG	NE*KDNFG	Q297*	NA	NA	coding	stop	NA	NA
AATGAGCAGTCTAAAATCCC	neStops	-	chrXI	37447	37469	YKL211C	TRP3	685	707	FALSE	229	236	NEQSKIPG	NE*SKIPG	Q231*	NA	NA	coding	stop	NA	NA
AATGAGCAGTTCAGTGGTTA	neStops	-	chrIV	1327677	1327699	YDR430C	CYM1	772	794	FALSE	258	265	NEQFSGYG	NE*FSGYG	Q260*	NA	NA	coding	stop	NA	NA
AATGATCCAAAACCCATTTA	neStops	+	chrXIII	153549	153571	YML059C	NTE1	4688	4710	FALSE	1563	1570	SLNGFWII	SLNGF*II	W1568*	NA	NA	coding	stop	NA	NA
AATGATTCAAAGAGGGTACC	neStops	+	chrVII	1033371	1033393	YGR271W	SLH1	1581	1603	FALSE	527	535	EMIQRGYQV	EMI*RGYQV	Q530*	NA	NA	coding	stop	NA	NA
AATGCAAAACGACTCTGCTT	neStops	-	chrXII	827456	827478	YLR348C	DIC1	396	418	FALSE	132	140	RMQNDSALE	RM*NDSALE	Q134*	NA	NA	coding	stop	NA	NA
AATGCAAGCCCAACAATCAA	neStops	-	chrXIII	305110	305132	YMR016C	SOK2	462	484	FALSE	154	162	QMQAQQSMA	QM*AQQSMA	Q156*	NA	NA	coding	stop	NA	NA
AATGCAAGGTAAATATCAGT	neStops	-	chrVIII	248588	248610	YHR075C	PPE1	1032	1054	FALSE	344	352	QMQGKYQLV	QM*GKYQLV	Q346*	NA	NA	coding	stop	NA	NA
AATGCAAGGTAATAAAGCAA	neStops	-	chrXV	339639	339661	YOR007C	SGT2	318	340	FALSE	106	114	KMQGNKAMA	KM*GNKAMA	Q108*	NA	NA	coding	stop	NA	NA
AATGCAGAGGAACGATGTTA	neStops	+	chrIII	153409	153431	YCR019W	MAK32	573	595	FALSE	191	199	VMQRNDVTV	VM*RNDVTV	Q193*	NA	NA	coding	stop	NA	NA
AATGCCAAATACTACATAAC	neStops	+	chrIII	146749	146771	YCR017C	CWH43	864	886	FALSE	288	296	SLLCSIWHF	SLLCSI*HF	W294*	NA	NA	coding	stop	NA	NA
AATGCCATTCGATATGACAA	neStops	-	chrXIII	390267	390289	YMR058W	FET3	1446	1468	FALSE	482	490	FHCHIEWHL	FHCHIE*HL	W488*	NA	NA	coding	stop	NA	NA
AATGCTACAGATTGATAGAC	neStops	-	chrII	577147	577169	YBR170C	NPL4	918	940	FALSE	306	314	EMLQIDRQA	EML*IDRQA	Q309*	NA	NA	coding	stop	NA	NA
AATGCTGCAATACCCGCTAA	neStops	-	chrXIV	444968	444990	YNL095C	YNL095C	1851	1873	FALSE	617	625	LMLQYPLMV	LML*YPLMV	Q620*	NA	NA	coding	stop	NA	NA
AATGGAGCAGCTAGAAGCGG	neStops	-	chrVII	836554	836576	YGR169C-A	LSO2	90	112	FALSE	30	38	QMEQLEAEE	QME*LEAEE	Q33*	NA	NA	coding	stop	NA	NA
AATGGATCAATTGAGTAAAT	neStops	-	chrII	496461	496483	YBR130C	SHE3	387	409	FALSE	129	137	KMDQLSKLA	KMD*LSKLA	Q132*	NA	NA	coding	stop	NA	NA
AATGGCAGCTAACAATACGA	neStops	-	chrXVI	683307	683329	YPR068C	HOS1	1025	1047	FALSE	342	349	EWQLTIRG	EW*LTIRG	Q344*	NA	NA	coding	stop	NA	NA
AATGGTGCAAATTCCTCTTT	neStops	-	chrVII	616747	616769	YGR062C	COX18	510	532	FALSE	170	178	PMVQIPLWV	PMV*IPLWV	Q173*	NA	NA	coding	stop	NA	NA
AATGTACAAAATCCATTACT	neStops	+	chrXI	624857	624879	YKR095W	MLP1	5053	5075	FALSE	1685	1692	NVQNPLLG	NV*NPLLG	Q1687*	NA	NA	coding	stop	NA	NA
AATGTACCAAAGGCCTATGC	neStops	-	chrXVI	474644	474666	YPL042C	SSN3	42	64	FALSE	14	22	PMYQRPMQV	PMY*RPMQV	Q17*	NA	NA	coding	stop	NA	NA
AATGTACGAGACGTGAGAGG	neStops	+	chrVIII	334323	334345	YHR111W	UBA4	1252	1274	FALSE	418	425	NVRDVRGG	NV*DVRGG	R420*	NA	NA	coding	stop	NA	NA
AATGTCAGTACTTTGATCCA	neStops	-	chrIV	1425039	1425061	YDR485C	VPS72	2147	2169	FALSE	716	723	ECQYFDPR	EC*YFDPR	Q718*	NA	NA	coding	stop	NA	NA
AATGTCGCAAGTAAGACCTA	neStops	-	chrIV	642328	642350	YDR097C	MSH6	1488	1510	FALSE	496	504	LMSQVRPME	LML*VRPME	S498L	Q499*	NA	coding	stop	c(-4.863, NA)	4.863
AATGTTACAGAGCCCTTTAT	neStops	-	chrII	402452	402474	YBR081C	SPT7	2778	2800	FALSE	926	934	RMLQSPLSA	RML*SPLSA	Q929*	NA	NA	coding	stop	NA	NA
AATTACCAATCCGTTACTTA	neStops	-	chrX	112375	112397	YJL163C	YJL163C	937	959	FALSE	313	320	NYQSVTYG	NY*SVTYG	Q315*	NA	NA	coding	stop	NA	NA
AATTACCAGCCTAAGACTGT	neStops	-	chrV	369120	369142	YER105C	NUP157	2872	2894	FALSE	958	965	NYQPKTVG	NY*PKTVG	Q960*	NA	NA	coding	stop	NA	NA
AATTAGACAAGTTACTCCCA	neStops	-	chrXV	427158	427180	YOR052C	TMC1	45	67	FALSE	15	23	EIRQVTPKD	EIR*VTPKD	Q18*	NA	NA	coding	stop	NA	NA
AATTAGCCAATTTAACCAAA	neStops	-	chrII	274729	274751	YBR018C	GAL7	777	799	FALSE	259	267	SISQFNQMV	SIS*FNQMV	Q262*	NA	NA	coding	stop	NA	NA
AATTATCAGATTACCTGCTT	neStops	+	chrXII	831749	831771	YLR352W	YLR352W	634	656	FALSE	212	219	NYQITCLG	NY*ITCLG	Q214*	NA	NA	coding	stop	NA	NA
AATTATCAGCGACTTAAATA	neStops	-	chrIV	1092222	1092244	YDR314C	RAD34	268	290	FALSE	90	97	NYQRLKYG	NY*RLKYG	Q92*	NA	NA	coding	stop	NA	NA
AATTCAAAACTCTCCTGATA	neStops	+	chrIV	654161	654183	YDR099W	BMH2	555	577	FALSE	185	193	EIQNSPDKA	EI*NSPDKA	Q187*	NA	NA	coding	stop	NA	NA
AATTCAAAGGGGTGATATTA	neStops	-	chrXI	407004	407026	YKL017C	HCS1	216	238	FALSE	72	80	KIQRGDIKV	KI*RGDIKV	Q74*	NA	NA	coding	stop	NA	NA
AATTCAACATTATCTGAAGA	neStops	+	chrII	712637	712659	YBR246W	RRT2	1047	1069	FALSE	349	357	QIQHYLKKG	QI*YYLKKG	Q351*	H352Y	NA	coding	stop	c(NA, -2.298)	2.298
AATTCAAGAGCCACGAAGAG	neStops	-	chrXII	629433	629455	YLR247C	IRC20	3900	3922	FALSE	1300	1308	EIQEPRREG	EI*EPRREG	Q1302*	NA	NA	coding	stop	NA	NA
AATTCAAGATAGCACTGCGT	neStops	-	chrXIII	75336	75358	YML099C	ARG81	1683	1705	FALSE	561	569	LIQDSTALD	LI*DSTALD	Q563*	NA	NA	coding	stop	NA	NA
AATTCAAGCCGAAAAAAGAA	neStops	-	chrXIV	514029	514051	YNL059C	ARP5	885	907	FALSE	295	303	RIQAEKRKE	RI*AEKRKE	Q297*	NA	NA	coding	stop	NA	NA
AATTCAAGGTTGGGACCACT	neStops	+	chrXII	412189	412211	YLR134W	PDC5	1467	1489	FALSE	489	497	EIQGWDHLA	EI*GWDHLA	Q491*	NA	NA	coding	stop	NA	NA
AATTCAGACTGAGCTGGACA	neStops	+	chrXII	562529	562551	YLR210W	CLB4	522	544	FALSE	174	182	EIQTELDRA	EI*TELDRA	Q176*	NA	NA	coding	stop	NA	NA
AATTCAGAGACAGACAAGAG	neStops	-	chrVII	887839	887861	YGR194C	XKS1	15	37	FALSE	5	13	VIQRQTREV	VI*RQTREV	Q7*	NA	NA	coding	stop	NA	NA
AATTCAGGTTGGTTCTCAAC	neStops	-	chrXI	597522	597544	YKR084C	HBS1	1347	1369	FALSE	449	457	KIQVGSQQG	KI*VGSQQG	Q451*	NA	NA	coding	stop	NA	NA
AATTCCAAAAACTTAATCAA	neStops	-	chrIX	182939	182961	YIL096C	BMT5	167	189	FALSE	56	63	EFQKLNQG	EF*KLNQG	Q58*	NA	NA	coding	stop	NA	NA
AATTCCAGGAAACTCTATTG	neStops	+	chrXV	887395	887417	YOR304W	ISW2	2882	2904	FALSE	961	968	KFQETLLR	KF*ETLLR	Q963*	NA	NA	coding	stop	NA	NA
AATTCCATATTCTTGCCGTA	neStops	+	chrXVI	201858	201880	YPL183C	RTT10	657	679	FALSE	219	227	SHTARIWNL	SHTARI*NL	W225*	NA	NA	coding	stop	NA	NA
AATTCTGCAATTATTAGATT	neStops	-	chrXI	86983	87005	YKL188C	PXA2	1782	1804	FALSE	594	602	KILQLLDLE	KIL*LLDLE	Q597*	NA	NA	coding	stop	NA	NA
AATTGCAATACGATGACCTC	neStops	-	chrXII	248322	248344	YLR053C	YLR053C	83	105	FALSE	28	35	KLQYDDLG	KL*YDDLG	Q30*	NA	NA	coding	stop	NA	NA
AATTGCGAATTGCTGTACAA	neStops	-	chrXI	168800	168822	YKL149C	DBR1	8	30	FALSE	3	10	KLRIAVQG	KL*IAVQG	R5*	NA	NA	coding	stop	NA	NA
AATTGCGCAAGTATTGCCCT	neStops	-	chrIV	1147741	1147763	YDR338C	YDR338C	1704	1726	FALSE	568	576	LIAQVLPLV	LIV*VLPLV	A570V	Q571*	NA	coding	stop	c(0.774, NA)	0.774
AATTGGCCAAACAACCCCTT	neStops	+	chrIV	564801	564823	YDR055W	PST1	1275	1297	FALSE	425	433	PIGQTTPLV	PIG*TTPLV	Q428*	NA	NA	coding	stop	NA	NA
AATTGTACAAAAATACTGCG	neStops	-	chrXII	883884	883906	YLR382C	NAM2	846	868	FALSE	282	290	PIVQKYCEE	PIV*KYCEE	Q285*	NA	NA	coding	stop	NA	NA
AATTGTGCAGATCACCGGCT	neStops	+	chrXV	879958	879980	YOR299W	BUD7	1524	1546	FALSE	508	516	EIVQITGWE	EIV*ITGWE	Q511*	NA	NA	coding	stop	NA	NA
AATTTACAAAAATTAACTAC	neStops	+	chrXIV	409598	409620	YNL116W	DMA2	1258	1280	FALSE	420	427	NLQKLTTG	NL*KLTTG	Q422*	NA	NA	coding	stop	NA	NA
AATTTACAACAAGAAGATGA	neStops	-	chrVII	891360	891382	YGR196C	FYV8	805	827	FALSE	269	276	NLQQEDDG	NL*QEDDG	Q271*	NA	NA	coding	stop	NA	NA
AATTTCAAACATTGGAGAGA	neStops	+	chrXV	455590	455612	YOR069W	VPS5	1823	1845	FALSE	608	615	EFQTLERR	EF*TLERR	Q610*	NA	NA	coding	stop	NA	NA
AATTTCAAGAACTGAAGGAG	neStops	-	chrIII	243776	243798	YCR073C	SSK22	2786	2808	FALSE	929	936	QFQELKER	QF*ELKER	Q931*	NA	NA	coding	stop	NA	NA
AATTTCAAGAGGAGGCGAAC	neStops	-	chrII	678793	678815	YBR229C	ROT2	407	429	FALSE	136	143	KFQEEANR	KF*EEANR	Q138*	NA	NA	coding	stop	NA	NA
AATTTCCACATGTCCTTTGG	neStops	-	chrXV	219811	219833	YOL058W	ARG1	601	623	FALSE	201	208	PPKDMWKL	PPKDM*KL	W206*	NA	NA	coding	stop	NA	NA
AATTTCCAGAAGGAAACAAT	neStops	+	chrII	539556	539578	YBR148W	YSW1	1681	1703	FALSE	561	568	NFQKETIG	NF*KETIG	Q563*	NA	NA	coding	stop	NA	NA
AATTTGCAAAAAGAAACACT	neStops	-	chrXV	739339	739361	YOR211C	MGM1	2209	2231	FALSE	737	744	NLQKETLG	NL*KETLG	Q739*	NA	NA	coding	stop	NA	NA
AATTTGCAAAACGAATTTGA	neStops	+	chrXV	578675	578697	YOR134W	BAG7	112	134	FALSE	38	45	NLQNEFDG	NL*NEFDG	Q40*	NA	NA	coding	stop	NA	NA
AATTTGCAAAATGACAGCAT	neStops	-	chrXIII	787136	787158	YMR259C	TRM732	1726	1748	FALSE	576	583	NLQNDSIG	NL*NDSIG	Q578*	NA	NA	coding	stop	NA	NA
AATTTGCAGAATCAGGACTT	neStops	-	chrXI	639280	639302	YKR100C	SKG1	667	689	FALSE	223	230	NLQNQDFG	NL*NQDFG	Q225*	NA	NA	coding	stop	NA	NA
ACAAAAACAATATAACGGTT	neStops	-	chrXIV	374476	374498	YNL133C	FYV6	195	217	FALSE	65	73	KQKQYNGLV	KQK*YNGLV	Q68*	NA	NA	coding	stop	NA	NA
ACAAAAACAGCAGGAGCAGC	neStops	+	chrXIII	564521	564543	YMR153W	NUP53	87	109	FALSE	29	37	QQKQQEQLE	QQK*QEQLE	Q32*	NA	NA	coding	stop	NA	NA
ACAAAACAGAATGACCATGT	neStops	-	chrVIII	167981	168003	YHR029C	YHI9	559	581	FALSE	187	194	TKQNDHVG	TK*NDHVG	Q189*	NA	NA	coding	stop	NA	NA
ACAAAAGCAAAGTTCTGAGT	neStops	-	chrII	544421	544443	YBR150C	TBS1	51	73	FALSE	17	25	TQKQSSEWA	TQK*SSEWA	Q20*	NA	NA	coding	stop	NA	NA
ACAAACCAAAACTTACTGGG	neStops	+	chrXV	287156	287178	YOL020W	TAT2	985	1007	FALSE	329	336	TNQNLLGG	TN*NLLGG	Q331*	NA	NA	coding	stop	NA	NA
ACAAACCAAACATACATCAT	neStops	-	chrVIII	174118	174140	YHR032W	ERC1	775	797	FALSE	259	266	PMMYVWFV	PMMYV*FV	W264*	NA	NA	coding	stop	NA	NA
ACAAACCATAAAGACATCAA	neStops	+	chrVIII	112742	112764	YHR004C	NEM1	331	353	FALSE	111	118	PLMSLWFV	PLMSL*FV	W116*	NA	NA	coding	stop	NA	NA
ACAAACTCAAAATCCTTATT	neStops	-	chrX	40913	40935	YJL208C	NUC1	249	271	FALSE	83	91	RQTQNPYWV	RQI*NPYWV	T85I	Q86*	NA	coding	stop	c(-4.321, NA)	4.321
ACAAAGACAGATAAATCGTG	neStops	+	chrV	282168	282190	YER063W	THO1	459	481	FALSE	153	161	LQRQINRVE	LQR*INRVE	Q156*	NA	NA	coding	stop	NA	NA
ACAAAGCAAAGAAACGTGCA	neStops	-	chrXI	474873	474895	YKR018C	YKR018C	1006	1028	FALSE	336	343	TKQRNVHG	TK*RNVHG	Q338*	NA	NA	coding	stop	NA	NA
ACAAAGCAGTTAGAAAACCC	neStops	-	chrII	464524	464546	YBR112C	CYC8	1225	1247	FALSE	409	416	TKQLENPG	TK*LENPG	Q411*	NA	NA	coding	stop	NA	NA
ACAAAGTCAACGGCATATAG	neStops	+	chrIV	907395	907417	YDR221W	GTB1	66	88	FALSE	22	30	QQSQRHIVG	QQS*RHIVG	Q25*	NA	NA	coding	stop	NA	NA
ACAAATACAAAATGGCCTCC	neStops	-	chrXI	542306	542328	YKR054C	DYN1	5598	5620	FALSE	1866	1874	QQIQNGLQV	QQI*NGLQV	Q1869*	NA	NA	coding	stop	NA	NA
ACAAATGCAGCCGGACTTCT	neStops	+	chrXIV	189109	189131	YNL243W	SLA2	1059	1081	FALSE	353	361	AQMQPDFWA	AQM*PDFWA	Q356*	NA	NA	coding	stop	NA	NA
ACAAATTCAAAAGAATCTAA	neStops	-	chrIV	390194	390216	YDL035C	GPR1	1842	1864	FALSE	614	622	AQIQKNLRA	AQI*KNLRA	Q617*	NA	NA	coding	stop	NA	NA
ACAAATTCAGTTGACATCCC	neStops	+	chrXII	1050240	1050262	YLR454W	FMP27	6243	6265	FALSE	2081	2089	PQIQLTSLE	PQI*LTSLE	Q2084*	NA	NA	coding	stop	NA	NA
ACAACAAAAAGCGTTATACA	neStops	-	chrXVI	832483	832505	YPR152C	URN1	954	976	FALSE	318	326	KQQKALYKA	KQ*KALYKA	Q320*	NA	NA	coding	stop	NA	NA
ACAACAACAGCTAGGGGACA	neStops	+	chrVII	1043401	1043423	YGR275W	RTT102	126	148	FALSE	42	50	PQQQLGDME	PQ**LGDME	Q44*	Q45*	NA	coding	stop	c(NA, NA)	NA
ACAACAAGAGCAACAAAATA	neStops	+	chrVII	308012	308034	YGL105W	ARC1	576	598	FALSE	192	200	QQQEQQNKA	QQ*EQQNKA	Q194*	NA	NA	coding	stop	NA	NA
ACAACAAGCTCCTTTAGACC	neStops	+	chrXIII	172595	172617	YML051W	GAL80	1002	1024	FALSE	334	342	GQQAPLDPG	GQ*APLDPG	Q336*	NA	NA	coding	stop	NA	NA
ACAACACGAGTAACTTGGGG	neStops	+	chrXII	1048150	1048172	YLR454W	FMP27	4153	4175	FALSE	1385	1392	TTRVTWGG	TI*VTWGG	T1386I	R1387*	NA	coding	stop	c(-5.127, NA)	5.127
ACAACAGAGAGCGTTCCTCA	neStops	-	chrIX	291525	291547	YIL033C	BCY1	123	145	FALSE	41	49	EQQRAFLKA	EQ*RAFLKA	Q43*	NA	NA	coding	stop	NA	NA
ACAACAGCAAGAATTTAGAA	neStops	-	chrII	577387	577409	YBR170C	NPL4	678	700	FALSE	226	234	LQQQEFRMV	LQ**EFRMV	Q228*	Q229*	NA	coding	stop	c(NA, NA)	NA
ACAACAGCTGATAGATGAAG	neStops	+	chrVII	136339	136361	YGL195W	GCN1	4815	4837	FALSE	1605	1613	LQQLIDEVE	LQ*LIDEVE	Q1607*	NA	NA	coding	stop	NA	NA
ACAACAGGGTCTGTATCAGG	neStops	+	chrXII	180773	180795	YLR019W	PSR2	486	508	FALSE	162	170	PQQGLYQVG	PQ*GLYQVG	Q164*	NA	NA	coding	stop	NA	NA
ACAACAGGTGTTGTCCTCTG	neStops	+	chrXV	159238	159260	YOL086W-A	MHF1	66	88	FALSE	22	30	LQQVLSSED	LQ*VLSSED	Q24*	NA	NA	coding	stop	NA	NA
ACAACAGTTCCACAACGAAG	neStops	+	chrVI	42022	42044	YFL047W	RGD2	1602	1624	FALSE	534	542	KQQFHNEGE	KQ*FHNEGE	Q536*	NA	NA	coding	stop	NA	NA
ACAACCAAAAAACGATGTGC	neStops	-	chrXV	641315	641337	YOR162C	YRR1	656	678	FALSE	219	226	NNQKTMCR	NN*KTMCR	Q221*	NA	NA	coding	stop	NA	NA
ACAACCACAATTTAAGTACA	neStops	+	chrII	776271	776293	YBR286W	APE3	1572	1594	FALSE	524	532	QQPQFKYRA	QQL*FKYRA	P526L	Q527*	NA	coding	stop	c(-3.509, NA)	3.509
ACAACGAATACTATATCTTT	neStops	-	chrXV	456719	456741	YOR070C	GYP1	1080	1102	FALSE	360	368	LQRILYLWA	LQ*ILYLWA	R362*	NA	NA	coding	stop	NA	NA
ACAACGAATACTTTATTTAT	neStops	-	chrVI	84906	84928	YFL025C	BST1	2307	2329	FALSE	769	777	VQRILYLLD	VQ*ILYLLD	R771*	NA	NA	coding	stop	NA	NA
ACAACGCCAATTGAACTCCA	neStops	-	chrVII	851499	851521	YGR178C	PBP1	1695	1717	FALSE	565	573	QQRQLNSMG	QQC*LNSMG	R567C	Q568*	NA	coding	stop	c(-6.894, NA)	6.894
ACAAGACGAAAATCTATTAT	neStops	-	chrX	78118	78140	YJL187C	SWE1	1123	1145	FALSE	375	382	TRRKSIIG	TR*KSIIG	R377*	NA	NA	coding	stop	NA	NA
ACAAGATCAAGTAGATCATC	neStops	-	chrXVI	826292	826314	YPR147C	YPR147C	246	268	FALSE	82	90	LQDQVDHQV	LQD*VDHQV	Q85*	NA	NA	coding	stop	NA	NA
ACAAGCACAGGCGCAAGCAC	neStops	-	chrII	464183	464205	YBR112C	CYC8	1566	1588	FALSE	522	530	AQAQAQAQA	AQV*AQAQA	A524V	Q525*	NA	coding	stop	c(-0.384, NA)	0.384
ACAAGCCCAGGAGACACATG	neStops	-	chrXII	613493	613515	YLR237W	THI7	1127	1149	FALSE	376	383	AACVSWAC	AACVS*TC	W381*	A382T	NA	coding	stop	c(NA, -3.045)	3.045
ACAAGCCCAGGCCCAGCAAC	neStops	-	chrXIV	343944	343966	YNL154C	YCK2	1311	1333	FALSE	437	445	QQAQAQQQA	QQV*AQQQA	A439V	Q440*	NA	coding	stop	c(-0.752, NA)	0.752
ACAAGCGCAACAGGCACAAC	neStops	-	chrXV	859571	859593	YOR290C	SNF2	666	688	FALSE	222	230	QQAQQAQQA	QQV*QAQQA	A224V	Q225*	NA	coding	stop	c(-0.332, NA)	0.332
ACAAGTTCCAATCCATGTTA	neStops	+	chrXVI	294814	294836	YPL137C	GIP3	1812	1834	FALSE	604	612	RHNMDWNLF	RHNMD*NLF	W609*	NA	NA	coding	stop	NA	NA
ACAATACCAAGATCCAAGCA	neStops	+	chrXI	99398	99420	YKL183W	LOT5	678	700	FALSE	226	234	EQYQDPSMA	EQY*DPSMA	Q229*	NA	NA	coding	stop	NA	NA
ACAATCCCAGATACCATCAC	neStops	+	chrV	336624	336646	YER089C	PTC2	695	717	FALSE	232	239	ACDGIWDC	ACDGI*NC	W237*	D238N	NA	coding	stop	c(NA, -5)	5
ACACAAAAACATACCTTAAA	neStops	-	chrXII	533498	533520	YLR189C	ATG26	874	896	FALSE	292	299	TQKHTLNG	T*KHTLNG	Q293*	NA	NA	coding	stop	NA	NA
ACACAAAACCAACTGGATGA	neStops	+	chrVII	548396	548418	YGR032W	GSC2	133	155	FALSE	45	52	TQNQLDDG	T*NQLDDG	Q46*	NA	NA	coding	stop	NA	NA
ACACAAAATGGTTCTATTCA	neStops	-	chrIX	238694	238716	YIL066C	RNR3	1993	2015	FALSE	665	672	TQNGSIQG	T*NGSIQG	Q666*	NA	NA	coding	stop	NA	NA
ACACAAAGAGAAAGTCAAAT	neStops	+	chrXIV	671780	671802	YNR023W	SNF12	1363	1385	FALSE	455	462	TQRESQIG	T*RESQIG	Q456*	NA	NA	coding	stop	NA	NA
ACACAACCAATTAGTACATG	neStops	-	chrIV	1509287	1509309	YDR536W	STL1	1283	1305	FALSE	428	435	STCTNWLC	STCTN*LC	W433*	NA	NA	coding	stop	NA	NA
ACACAAGCACTATCCAAAAG	neStops	+	chrXVI	548507	548529	YPL005W	AEP3	22	44	FALSE	8	15	TQALSKSG	T*VLSKSG	Q9*	A10V	NA	coding	stop	c(NA, -1.039)	1.039
ACACAAGGTAACTACGGTCT	neStops	+	chrXV	821761	821783	YOR266W	PNT1	739	761	FALSE	247	254	TQGNYGLG	T*GNYGLG	Q248*	NA	NA	coding	stop	NA	NA
ACACACTCCAAGAAGATTGT	neStops	-	chrXIII	752413	752435	YMR241W	YHM2	453	475	FALSE	151	159	VPQSSWSVF	VPQSS*NMF	W156*	S157N	V158M	coding	stop	c(NA, -0.794, -1.46)	1.46
ACACAGCACCATGTACCAGA	neStops	+	chrXII	527808	527830	YLR187W	SKG3	2944	2966	FALSE	982	989	TQHHVPDG	T*YHVPDG	Q983*	H984Y	NA	coding	stop	c(NA, 0.321)	0.321
ACACAGGAGGATGATCTAGA	neStops	+	chrX	697186	697208	YJR142W	YJR142W	46	68	FALSE	16	23	TQEDDLEG	T*EDDLEG	Q17*	NA	NA	coding	stop	NA	NA
ACACAGGGAAATCCAATCCC	neStops	+	chrIX	286908	286930	YIL036W	CST6	1243	1265	FALSE	415	422	TQGNPIPG	T*GNPIPG	Q416*	NA	NA	coding	stop	NA	NA
ACACAGTCAGTAGGCATTGC	neStops	+	chrXIV	228249	228271	YNL223W	ATG4	880	902	FALSE	294	301	TQSVGIAG	T*LVGIAG	Q295*	S296L	NA	coding	stop	c(NA, -5.333)	5.333
ACACATCAAAGGGGTCCGAA	neStops	+	chrXVI	414073	414095	YPL075W	GCR1	1069	1091	FALSE	357	364	THQRGPKG	TY*RGPKG	H358Y	Q359*	NA	coding	stop	c(0.015, NA)	0.015
ACACCAAAAGGACTTTAGCT	neStops	-	chrXII	315671	315693	YLR087C	CSF1	39	61	FALSE	13	21	THQKDFSWV	TH*KDFSWV	Q15*	NA	NA	coding	stop	NA	NA
ACACCAAGAATCACCCAAGT	neStops	-	chrVIII	251759	251781	YHR076W	PTC7	566	588	FALSE	189	196	ANLGDSWC	ANLGDS*C	W195*	NA	NA	coding	stop	NA	NA
ACACCACGTCATTCCACCCG	neStops	+	chrXVI	811680	811702	YPR138C	MEP3	752	774	FALSE	251	258	TTGGMTWC	TTGGMT*C	W257*	NA	NA	coding	stop	NA	NA
ACACCCTCAAATTGTTCCTA	neStops	+	chrXVI	49326	49348	YPL260W	CUB1	24	46	FALSE	8	16	QHPQIVPKE	QHF*IVPKE	P10F	Q11*	NA	coding	stop	c(-3.496, NA)	3.496
ACACCTTCCAATCTTTGCAA	neStops	+	chrXII	713653	713675	YLR288C	MEC3	1230	1252	FALSE	410	418	IRCKDWKVC	IRCKD*KMC	W415*	V417M	NA	coding	stop	c(NA, -1.929)	1.929
ACACGAGAATGCTCCCGCCT	neStops	-	chrXI	164999	165021	YKL151C	NNR2	910	932	FALSE	304	311	TRECSRLG	T*ECSRLG	R305*	NA	NA	coding	stop	NA	NA
ACACTCCGAGCAACCATAGC	neStops	+	chrVII	293532	293554	YGL114W	YGL114W	73	95	FALSE	25	32	TLRATIAG	TF*ATIAG	L26F	R27*	NA	coding	stop	c(-2.296, NA)	2.296
ACACTTTCAGTATGCCTCCA	neStops	-	chrX	528155	528177	YJR049C	UTR1	300	322	FALSE	100	108	THFQYASTA	THF*YASTA	Q103*	NA	NA	coding	stop	NA	NA
ACAGAAACAACAAGGTACTA	neStops	-	chrVII	264737	264759	YGL131C	SNT2	1101	1123	FALSE	367	375	LQKQQGTKD	LQK*QGTKD	Q370*	NA	NA	coding	stop	NA	NA
ACAGACCAGAGACCAATCTT	neStops	-	chrI	195004	195026	YAR042W	SWH1	2386	2408	FALSE	796	803	PKIGLWSV	PKIGL*SV	W801*	NA	NA	coding	stop	NA	NA
ACAGAGCCAAATAATTGACA	neStops	-	chrVII	29396	29418	YGL251C	HFM1	2067	2089	FALSE	689	697	KQSQIIDRV	KQS*IIDRV	Q692*	NA	NA	coding	stop	NA	NA
ACAGCAAAAAGCCCGTCCTC	neStops	-	chrIV	766807	766829	YDR153C	ENT5	1143	1165	FALSE	381	389	KQQKARPQA	KQ*KARPQA	Q383*	NA	NA	coding	stop	NA	NA
ACAGCAAAAGCTACAGAAAT	neStops	+	chrVII	1024554	1024576	YGR266W	YGR266W	1899	1921	FALSE	633	641	EQQKLQKLE	EQ*KLQKLE	Q635*	NA	NA	coding	stop	NA	NA
ACAGCAAAGCACTCAAAATG	neStops	+	chrX	340944	340966	YJL051W	IRC8	1158	1180	FALSE	386	394	PQQSTQNED	PQ*STQNED	Q388*	NA	NA	coding	stop	NA	NA
ACAGCAAATGCCAAATGGTC	neStops	+	chrII	455130	455152	YBR108W	AIM3	309	331	FALSE	103	111	QQQMPNGQA	QQ*MPNGQA	Q105*	NA	NA	coding	stop	NA	NA
ACAGCAACAAGAACAGCAAC	neStops	-	chrV	209785	209807	YER027C	GAL83	426	448	FALSE	142	150	QQQQEQQQG	QQ**EQQQG	Q144*	Q145*	NA	coding	stop	c(NA, NA)	NA
ACAGCAGATGGAGGACCAAA	neStops	+	chrIX	362813	362835	YIR003W	AIM21	1929	1951	FALSE	643	651	EQQMEDQME	EQ*MEDQME	Q645*	NA	NA	coding	stop	NA	NA
ACAGCAGCAACCAGAAGAAG	neStops	-	chrIX	298875	298897	YIL030C	SSM4	1113	1135	FALSE	371	379	QQQQPEEEA	QQ**PEEEA	Q373*	Q374*	NA	coding	stop	c(NA, NA)	NA
ACAGCAGGACAATTTCAACG	neStops	+	chrXII	50786	50808	YLL043W	FPS1	849	871	FALSE	283	291	IQQDNFNVA	IQ*DNFNVA	Q285*	NA	NA	coding	stop	NA	NA
ACAGCAGGAGAATGGTGATG	neStops	-	chrXV	193515	193537	YOL075C	YOL075C	6	28	FALSE	2	10	SQQENGDVA	SQ*ENGDVA	Q4*	NA	NA	coding	stop	NA	NA
ACAGCAGTTTACTGAAGCAG	neStops	+	chrXI	641466	641488	YKR101W	SIR1	927	949	FALSE	309	317	KQQFTEAEV	KQ*FTEAEV	Q311*	NA	NA	coding	stop	NA	NA
ACAGCCATGTATCAGAATAG	neStops	+	chrXVI	45984	46006	YPL263C	KEL3	501	523	FALSE	167	175	YHYSDTWLF	YHYSDT*LF	W173*	NA	NA	coding	stop	NA	NA
ACAGCGAAAGCTTACACCAG	neStops	-	chrXIII	652602	652624	YMR194C-B	CMC4	192	214	FALSE	64	72	KQRKLTPGD	KQ*KLTPGD	R66*	NA	NA	coding	stop	NA	NA
ACAGCTCAGTCACTTCATTT	neStops	+	chrXVI	365234	365256	YPL097W	MSY1	283	305	FALSE	95	102	TAQSLHLG	TV*SLHLG	A96V	Q97*	NA	coding	stop	c(-4, NA)	4
ACAGCTGCAATATGAAACAT	neStops	+	chrVIII	41346	41368	YHL030W	ECM29	1263	1285	FALSE	421	429	RQLQYETLG	RQL*YETLG	Q424*	NA	NA	coding	stop	NA	NA
ACAGGCACAGGCTCAAGTTC	neStops	+	chrVII	158922	158944	YGL181W	GTS1	1017	1039	FALSE	339	347	AQAQAQVQA	AQV*AQVQA	A341V	Q342*	NA	coding	stop	c(-0.44, NA)	0.44
ACAGGCCAGCAGGGCCCTCT	neStops	-	chrXIV	380402	380424	YNL130C	CPT1	316	338	FALSE	106	113	TGQQGPLG	TG*QGPLG	Q108*	NA	NA	coding	stop	NA	NA
ACAGTCAAACAAGTAACGTA	neStops	-	chrII	105670	105692	YBL061C	SKT5	1715	1737	FALSE	572	579	DSQTSNVG	DS*TSNVG	Q574*	NA	NA	coding	stop	NA	NA
ACAGTCACAGTGGGACTTGG	neStops	-	chrIII	94737	94759	YCL016C	DCC1	1005	1027	FALSE	335	343	LQSQWDLED	LQL*WDLED	S337L	Q338*	NA	coding	stop	c(-5.415, NA)	5.415
ACAGTCCAATATGCGGCGAT	neStops	-	chrXIII	288223	288245	YMR011W	HXT2	145	167	FALSE	49	56	PIAAYWTV	PIAAY*TV	W54*	NA	NA	coding	stop	NA	NA
ACAGTTGCAAGGCTACGTCT	neStops	+	chrV	80701	80723	YEL038W	UTR4	240	262	FALSE	80	88	KQLQGYVWA	KQL*GYVWA	Q83*	NA	NA	coding	stop	NA	NA
ACATCAAAAAACCCGTCAAA	neStops	-	chrXI	185585	185607	YKL138C	MRPL31	75	97	FALSE	25	33	THQKTRQRE	TH*KTRQRE	Q27*	NA	NA	coding	stop	NA	NA
ACATCAAAAATGGTCTGGTG	neStops	-	chrV	285351	285373	YER065C	ICL1	1542	1564	FALSE	514	522	KHQKWSGAE	KH*KWSGAE	Q516*	NA	NA	coding	stop	NA	NA
ACATCAAGCACTACCAAATA	neStops	+	chrXVI	25842	25864	YPL273W	SAM4	756	778	FALSE	252	260	LHQALPNMA	LH*ALPNMA	Q254*	NA	NA	coding	stop	NA	NA
ACATCAAGCACTGCCAAATA	neStops	-	chrXIII	917779	917801	YMR321C	YMR321C	96	118	FALSE	32	40	LHQALPNMA	LH*ALPNMA	Q34*	NA	NA	coding	stop	NA	NA
ACATCAATCTTCTGTTCATT	neStops	-	chrXIII	624945	624967	YMR182C	RGM1	201	223	FALSE	67	75	QHQSSVHSD	QH*SSVHSD	Q69*	NA	NA	coding	stop	NA	NA
ACATCAGGATAATTTGCGTG	neStops	-	chrVIII	497933	497955	YHR199C	AIM46	468	490	FALSE	156	164	SHQDNLRAA	SH*DNLRAA	Q158*	NA	NA	coding	stop	NA	NA
ACATCCAGGCGGATAATGGA	neStops	+	chrX	602810	602832	YJR092W	BUD4	4076	4098	FALSE	1359	1366	DIQADNGG	DI*ADNGG	Q1361*	NA	NA	coding	stop	NA	NA
ACATCTCAATTGAGTATACA	neStops	-	chrXII	74886	74908	YLL032C	YLL032C	1840	1862	FALSE	614	621	TSQLSIQG	TF*LSIQG	S615F	Q616*	NA	coding	stop	c(1.389, NA)	1.389
ACATGAACAACAAAAACAGC	neStops	+	chrXIII	564512	564534	YMR153W	NUP53	78	100	FALSE	26	34	QHEQQKQQE	QHE*QKQQE	Q29*	NA	NA	coding	stop	NA	NA
ACATGAACAGGAAGTTGCGG	neStops	-	chrV	150864	150886	YEL001C	IRC22	93	115	FALSE	31	39	EHEQEVAEA	EHE*EVAEA	Q34*	NA	NA	coding	stop	NA	NA
ACATGAACGACGATACTCAT	neStops	-	chrIV	1149076	1149098	YDR338C	YDR338C	369	391	FALSE	123	131	EHERRYSSV	EHE*RYSSV	R126*	NA	NA	coding	stop	NA	NA
ACATGGCAAATCTCAGCCAC	neStops	-	chrII	139806	139828	YBL042C	FUI1	433	455	FALSE	145	152	TWQISATG	TW*ISATG	Q147*	NA	NA	coding	stop	NA	NA
ACATGGCCAAGCAATTGGAC	neStops	+	chrVIII	173724	173746	YHR032W	ERC1	381	403	FALSE	127	135	GHGQAIGPD	GHG*AIGPD	Q130*	NA	NA	coding	stop	NA	NA
ACATTCCAAAACCTAACCGA	neStops	+	chrIV	288217	288239	YDL095W	PMT1	1159	1181	FALSE	387	394	TFQNLTDG	TF*NLTDG	Q389*	NA	NA	coding	stop	NA	NA
ACATTTACAGAGACTAATCA	neStops	+	chrXII	136666	136688	YLL006W	MMM1	81	103	FALSE	27	35	EHLQRLIME	EHL*RLIME	Q30*	NA	NA	coding	stop	NA	NA
ACATTTCCAAGTGGCGGAAA	neStops	+	chrXV	359434	359456	YOR014W	RTS1	1761	1783	FALSE	587	595	PHFQVAEKV	PHF*VAEKV	Q590*	NA	NA	coding	stop	NA	NA
ACCAAACCATTTGAAGACAC	neStops	-	chrVII	58661	58683	YGL234W	ADE5,7	2180	2202	FALSE	727	734	PRVFKWFG	PRVFK*FG	W732*	NA	NA	coding	stop	NA	NA
ACCAAATCAGAGAATTGATT	neStops	+	chrXVI	69652	69674	YPL254W	HFI1	168	190	FALSE	56	64	GPNQRIDLG	GPN*RIDLG	Q59*	NA	NA	coding	stop	NA	NA
ACCAACCACCAGGGCGACTC	neStops	+	chrVII	1074897	1074919	YGR289C	MAL11	895	917	FALSE	299	306	PESPWWLV	PESPW*LV	W304*	NA	NA	coding	stop	NA	NA
ACCAACTCAAGAGATTATAG	neStops	-	chrIV	1443721	1443743	YDR497C	ITR1	1725	1747	FALSE	575	583	EPTQEIIED	EPI*EIIED	T577I	Q578*	NA	coding	stop	c(-2.702, NA)	2.702
ACCACAACCCAAACCAAAGA	neStops	-	chrVI	45284	45306	YFL044C	OTU1	255	277	FALSE	85	93	PPQPKPKRV	PP*SKPKRV	Q87*	P88S	NA	coding	stop	c(NA, 0.901)	0.901
ACCACAATTATTACCAATGT	neStops	+	chrVI	60788	60810	YFL036W	RPO41	2007	2029	FALSE	669	677	QPQLLPMLV	QP*LLPMLV	Q671*	NA	NA	coding	stop	NA	NA
ACCACAATTATTCATTACAA	neStops	-	chrXV	439892	439914	YOR059C	LPL1	345	367	FALSE	115	123	EPQLFITMA	EP*LFITMA	Q117*	NA	NA	coding	stop	NA	NA
ACCACAGACTGCGCATGATG	neStops	-	chrIII	21344	21366	YCL061C	MRC1	741	763	FALSE	247	255	PPQTAHDED	PP*TAHDED	Q249*	NA	NA	coding	stop	NA	NA
ACCACCAACTATATCAGAGA	neStops	+	chrIV	1033214	1033236	YDR285W	ZIP1	779	801	FALSE	260	267	NHQLYQRR	NH*LYQRR	Q262*	NA	NA	coding	stop	NA	NA
ACCACCCCAAAACAAAATAA	neStops	+	chrXV	987946	987968	YOR348C	PUT4	815	837	FALSE	272	279	SFILFWGG	SFILF*NG	W277*	G278N	NA	coding	stop	c(NA, -6)	6
ACCACCCCATGTAGCAGAAA	neStops	-	chrIV	112961	112983	YDL194W	SNF3	1382	1404	FALSE	461	468	AFSATWGG	AFSAT*NG	W466*	G467N	NA	coding	stop	c(NA, -5.761)	5.761
ACCAGCAGTTAAAAATTAGG	neStops	+	chrXII	907830	907852	YLR393W	ATP10	752	774	FALSE	251	258	DQQLKIRW	DQ*LKIRW	Q253*	NA	NA	coding	stop	NA	NA
ACCAGCCAAGGCAGTATCCT	neStops	-	chrXIII	827626	827648	YMR280C	CAT8	3682	3704	FALSE	1228	1235	TSQGSILG	TS*GSILG	Q1230*	NA	NA	coding	stop	NA	NA
ACCAGCTCAATCCTTAGGTG	neStops	-	chrVII	188107	188129	YGL167C	PMR1	2340	2362	FALSE	780	788	PPAQSLGVE	PPV*SLGVE	A782V	Q783*	NA	coding	stop	c(-3.967, NA)	3.967
ACCATTACAAAAGTATTTGC	neStops	+	chrXI	363296	363318	YKL039W	PTM1	675	697	FALSE	225	233	LPLQKYLLA	LPL*KYLLA	Q228*	NA	NA	coding	stop	NA	NA
ACCATTTCCAAACATAAAGA	neStops	-	chrXII	324485	324507	YLR092W	SUL2	942	964	FALSE	314	322	FLLYVWKWW	FLLYV*KWW	W319*	NA	NA	coding	stop	NA	NA
ACCCAAAAGCTATTGGGATT	neStops	+	chrXIII	877336	877358	YMR304W	UBP15	2350	2372	FALSE	784	791	TQKLLGFG	T*KLLGFG	Q785*	NA	NA	coding	stop	NA	NA
ACCCAAATTAGATTCATATC	neStops	-	chrXVI	475596	475618	YPL041C	MRX11	124	146	FALSE	42	49	TQIRFISG	T*IRFISG	Q43*	NA	NA	coding	stop	NA	NA
ACCCAACAAGGTACGATTAC	neStops	-	chrXII	45742	45764	YLL048C	YBT1	502	524	FALSE	168	175	TQQGTITG	T**GTITG	Q169*	Q170*	NA	coding	stop	c(NA, NA)	NA
ACCCAACGTATTGGGGAACA	neStops	-	chrIV	969553	969575	YDR256C	CTA1	106	128	FALSE	36	43	TQRIGEHG	T*CIGEHG	Q37*	R38C	NA	coding	stop	c(NA, -7.845)	7.845
ACCCAACTCATAAGTAGTTC	neStops	-	chrIV	975127	975149	YDR259C	YAP6	634	656	FALSE	212	219	TQLISSSG	T*FISSSG	Q213*	L214F	NA	coding	stop	c(NA, -3.63)	3.63
ACCCAAGCGCAGCAAGCAAG	neStops	+	chrIV	890459	890481	YDR213W	UPC2	709	731	FALSE	237	244	TQAQQASG	T*VQQASG	Q238*	A239V	NA	coding	stop	c(NA, -0.3)	0.3
ACCCAAGGTTTCAATGGATT	neStops	-	chrXI	291666	291688	YKL077W	YKL077W	214	236	FALSE	72	79	PNPLKPWV	PNPLKP*V	W78*	NA	NA	coding	stop	NA	NA
ACCCAAGTCCACGATTATAA	neStops	+	chrX	145667	145689	YJL145W	SFH5	508	530	FALSE	170	177	TQVHDYKG	T*VHDYKG	Q171*	NA	NA	coding	stop	NA	NA
ACCCAATATGCAATTGAAAA	neStops	-	chrIX	318591	318613	YIL017C	VID28	2353	2375	FALSE	785	792	TQYAIENG	T*YAIENG	Q786*	NA	NA	coding	stop	NA	NA
ACCCAATGGTCGAAAAGATT	neStops	-	chrVIII	285662	285684	YHR091C	MSR1	1087	1109	FALSE	363	370	TQWSKRLG	T*WSKRLG	Q364*	NA	NA	coding	stop	NA	NA
ACCCAATTATTTGCTAGTTG	neStops	-	chrXVI	83277	83299	YPL247C	YPL247C	898	920	FALSE	300	307	TQLFASCG	T*LFASCG	Q301*	NA	NA	coding	stop	NA	NA
ACCCACCCGAAGTAGCCTTC	neStops	-	chrXV	162533	162555	YOL084W	PHM7	178	200	FALSE	60	67	PEGYFGWV	PEGYFK*V	G65K	W66*	NA	coding	stop	c(-0.166, NA)	0.166
ACCCACGCTTCTTCTTCACC	neStops	-	chrV	252496	252518	YER049W	TPA1	769	791	FALSE	257	264	PGEEEAWV	PGEEET*V	A262T	W263*	NA	coding	stop	c(-0.374, NA)	0.374
ACCCACTTGCTTGTTTCCGA	neStops	+	chrXII	706760	706782	YLR284C	ECI1	259	281	FALSE	87	94	PSETSKWV	PSETSK*V	W93*	NA	NA	coding	stop	NA	NA
ACCCAGACCTCCCTGCGAGC	neStops	+	chrX	391996	392018	YJL027C	YJL027C	232	254	FALSE	78	85	PARREVWV	PARREI*V	V83I	W84*	NA	coding	stop	c(-1, NA)	1
ACCCAGAGGAACATCATCAG	neStops	+	chrIV	625859	625881	YDR090C	YDR090C	118	140	FALSE	40	47	PLMMFLWV	PLMMFL*V	W46*	NA	NA	coding	stop	NA	NA
ACCCAGCCATAACCACCGTC	neStops	+	chrXIV	391527	391549	YNL125C	ESBP6	619	641	FALSE	207	214	PDGGYGWV	PDGGYN*V	G212N	W213*	NA	coding	stop	c(-5.461, NA)	5.461
ACCCAGCCCCTTCCTACTCA	neStops	-	chrIV	636259	636281	YDR095C	YDR095C	247	269	FALSE	83	90	TQPLPTQG	T*FLPTQG	Q84*	P85F	NA	coding	stop	c(NA, -10.5)	10.5
ACCCAGCCTAGATCTTATAA	neStops	-	chrXIV	682636	682658	YNR031C	SSK2	2776	2798	FALSE	926	933	TQPRSYNG	T*FRSYNG	Q927*	P928F	NA	coding	stop	c(NA, -1.291)	1.291
ACCCAGGAAGCTGATTTCCA	neStops	+	chrVIII	291004	291026	YHR094C	HXT1	1600	1622	FALSE	534	541	PWKSASWV	PWKSAS*V	W540*	NA	NA	coding	stop	NA	NA
ACCCAGGAAGGGTTTGCTGC	neStops	-	chrIV	590545	590567	YDR072C	IPT1	778	800	FALSE	260	267	TQEGFAAG	T*EGFAAG	Q261*	NA	NA	coding	stop	NA	NA
ACCCAGGATGTCAAGAAATT	neStops	+	chrXV	645280	645302	YOR165W	SEY1	715	737	FALSE	239	246	TQDVKKLG	T*DVKKLG	Q240*	NA	NA	coding	stop	NA	NA
ACCCAGTTAATCCAGGTATC	neStops	-	chrVIII	308647	308669	YHR099W	TRA1	5887	5909	FALSE	1963	1970	PDTWINWV	PDTWIN*V	W1969*	NA	NA	coding	stop	NA	NA
ACCCATACCTTATCTTTGCC	neStops	-	chrIV	32617	32639	YDL236W	PHO13	322	344	FALSE	108	115	PGKDKVWV	PGKDKI*V	V113I	W114*	NA	coding	stop	c(-0.304, NA)	0.304
ACCCATAGGACGCCAATAAT	neStops	+	chrXII	443199	443221	YLR152C	YLR152C	1468	1490	FALSE	490	497	PIIGVLWV	PIIGVL*V	W496*	NA	NA	coding	stop	NA	NA
ACCCATCTAGCAATTTGTAT	neStops	+	chrIV	656140	656162	YDR101C	ARX1	1306	1328	FALSE	436	443	PIQIARWV	PIQIAK*V	R441K	W442*	NA	coding	stop	c(1.212, NA)	1.212
ACCCATCTATTTGTCTCGAT	neStops	-	chrI	193708	193730	YAR042W	SWH1	1090	1112	FALSE	364	371	PIETNRWV	PIETNK*V	R369K	W370*	NA	coding	stop	c(-1.294, NA)	1.294
ACCCCAAATATCAAATTTAC	neStops	+	chrXV	323528	323550	YOL002C	IZH2	815	837	FALSE	272	279	PGKFDIWG	PGKFDI*G	W278*	NA	NA	coding	stop	NA	NA
ACCCCAATTAATCATCGATA	neStops	-	chrXIV	629708	629730	YNR001C	CIT1	1332	1354	FALSE	444	452	LPQLIIDRA	LP*LIIDRA	Q446*	NA	NA	coding	stop	NA	NA
ACCCCAATTAGAATCCGTCT	neStops	+	chrIV	58954	58976	YDL223C	HBT1	1430	1452	FALSE	477	484	SKTDSNWG	SKTDSN*G	W483*	NA	NA	coding	stop	NA	NA
ACCCCACAAAATAGCAATGA	neStops	-	chrXII	779594	779616	YLR324W	PEX30	380	402	FALSE	127	134	AIIAILWG	AIIAIL*G	W133*	NA	NA	coding	stop	NA	NA
ACCCCACAAAGCTTCGCTTC	neStops	-	chrV	69162	69184	YEL045C	YEL045C	82	104	FALSE	28	35	TPQSFASG	TL*SFASG	P29L	Q30*	NA	coding	stop	c(-5, NA)	5
ACCCCACAACCCAACCAAAG	neStops	+	chrXIII	776438	776460	YMR253C	YMR253C	731	753	FALSE	244	251	ATLVGLWG	ATLVGL*G	W250*	NA	NA	coding	stop	NA	NA
ACCCCATCAAATTCTTGCTT	neStops	-	chrIV	450561	450583	YDR001C	NTH1	1893	1915	FALSE	631	639	APHQILAWE	APY*ILAWE	H633Y	Q634*	NA	coding	stop	c(-4.327, NA)	4.327
ACCCCATCCTTCTAAACCTC	neStops	-	chrIX	94463	94485	YIL136W	OM45	845	867	FALSE	282	289	ARGLEGWG	ARGLEE*G	G287E	W288*	NA	coding	stop	c(-7.643, NA)	7.643
ACCCCATTTCTTGAACGCAA	neStops	+	chrXIII	666115	666137	YMR201C	RAD14	824	846	FALSE	275	282	AFAFKKWG	AFAFKK*G	W281*	NA	NA	coding	stop	NA	NA
ACCCGACCAAGCTTTGATTA	neStops	+	chrVIII	21920	21942	YHL039W	EFM1	138	160	FALSE	46	54	KPDQALIRV	KPD*ALIRV	Q49*	NA	NA	coding	stop	NA	NA
ACCCGCAATACGTGGTCTCT	neStops	+	chrXVI	610878	610900	YPR024W	YME1	398	420	FALSE	133	140	YPQYVVSR	YL*YVVSR	P134L	Q135*	NA	coding	stop	c(-8.81, NA)	8.81
ACCCGCAATTATATGAACGG	neStops	+	chrVII	1034069	1034091	YGR271W	SLH1	2279	2301	FALSE	760	767	DPQLYERR	DL*LYERR	P761L	Q762*	NA	coding	stop	c(-9.64, NA)	9.64
ACCCTCAGTCACATACATCT	neStops	+	chrXIV	359906	359928	YNL141W	AAH1	311	333	FALSE	104	111	DPQSHTSR	DL*SHTSR	P105L	Q106*	NA	coding	stop	c(-9.982, NA)	9.982
ACCCTTACAAAGGGCCAATG	neStops	-	chrXIII	793129	793151	YMR261C	TPS3	219	241	FALSE	73	81	EPLQRANVG	EPL*RANVG	Q76*	NA	NA	coding	stop	NA	NA
ACCGAGACAATCTGATGGGA	neStops	+	chrVII	669496	669518	YGR092W	DBF2	1308	1330	FALSE	436	444	RPRQSDGRA	RPR*SDGRA	Q439*	NA	NA	coding	stop	NA	NA
ACCGATCAAACTAACCTGAA	neStops	+	chrXII	413344	413366	YLR135W	SLX4	64	86	FALSE	22	29	TDQTNLNG	TD*TNLNG	Q24*	NA	NA	coding	stop	NA	NA
ACCGCAACAAATGCAACCAA	neStops	+	chrXI	54957	54979	YKL204W	EAP1	1254	1276	FALSE	418	426	QPQQMQPMA	QP**MQPMA	Q420*	Q421*	NA	coding	stop	c(NA, NA)	NA
ACCGCCCAATCAGTATGACC	neStops	-	chrIX	411530	411552	YIR029W	DAL2	724	746	FALSE	242	249	PGHTDWAV	PGHTD*TV	W247*	A248T	NA	coding	stop	c(NA, -1.14)	1.14
ACCGCGACCACTTTCGGAGG	neStops	-	chrVII	381873	381895	YGL064C	MRH4	1314	1336	FALSE	438	446	PPRPLSEVV	PP*SLSEVV	R440*	P441S	NA	coding	stop	c(NA, -1.133)	1.133
ACCGGTCAAACGCCTTCTCT	neStops	-	chrV	477465	477487	YER155C	BEM2	5362	5384	FALSE	1788	1795	TGQTPSLG	TG*TPSLG	Q1790*	NA	NA	coding	stop	NA	NA
ACCGTCAATACGGCCAATGT	neStops	+	chrXVI	86493	86515	YPL245W	YPL245W	908	930	FALSE	303	310	DRQYGQCR	DR*YGQCR	Q305*	NA	NA	coding	stop	NA	NA
ACCGTTCCAGTAACCTTCAG	neStops	+	chrV	342084	342106	YER091C	MET6	62	84	FALSE	21	28	ATEGYWNG	ATEGY*NG	W26*	NA	NA	coding	stop	NA	NA
ACCTACAATTGAATTGTCAT	neStops	+	chrVIII	51646	51668	YHL027W	RIM101	536	558	FALSE	179	186	NLQLNCHW	NL*LNCHW	Q181*	NA	NA	coding	stop	NA	NA
ACCTATCAAAAAACATGGTC	neStops	-	chrVII	426428	426450	YGL038C	OCH1	355	377	FALSE	119	126	TYQKTWSG	TY*KTWSG	Q121*	NA	NA	coding	stop	NA	NA
ACCTCAATGGATGGTACTTA	neStops	+	chrXIV	711959	711981	YNR048W	YNR048W	330	352	FALSE	110	118	QPQWMVLTD	QP*WMVLTD	Q112*	NA	NA	coding	stop	NA	NA
ACCTCAGCTTTACCTCAATC	neStops	-	chrV	558344	558366	YER184C	TOG1	315	337	FALSE	105	113	QPQLYLNLD	QP*FYLNLD	Q107*	L108F	NA	coding	stop	c(NA, -1.334)	1.334
ACCTCAGTACATAGGATCTG	neStops	+	chrVII	109741	109763	YGL205W	POX1	1584	1606	FALSE	528	536	KPQYIGSVV	KP*YIGSVV	Q530*	NA	NA	coding	stop	NA	NA
ACCTCATCAATCTATGTCTC	neStops	+	chrXV	450920	450942	YOR066W	MSA1	1485	1507	FALSE	495	503	PPHQSMSRV	PPY*SMSRV	H497Y	Q498*	NA	coding	stop	c(-0.959, NA)	0.959
ACCTCCAGCCGTAAACCCAA	neStops	+	chrXIII	470843	470865	YMR102C	YMR102C	1488	1510	FALSE	496	504	DHWVYGWRL	DHWVYG*RL	W502*	NA	NA	coding	stop	NA	NA
ACCTGCAACCCCAGGAAAGT	neStops	-	chrXV	111644	111666	YOL108C	INO4	221	243	FALSE	74	81	DLQPQESR	DL*PQESR	Q76*	NA	NA	coding	stop	NA	NA
ACCTGCAGAAGTGTGTCCAG	neStops	-	chrXI	526932	526954	YKR049C	FMP46	278	300	FALSE	93	100	DLQKCVQR	DL*KCVQR	Q95*	NA	NA	coding	stop	NA	NA
ACCTGCAGGTAAAGCCAAAA	neStops	+	chrXV	872084	872106	YOR296W	YOR296W	1883	1905	FALSE	628	635	YLQVKPKG	YL*VKPKG	Q630*	NA	NA	coding	stop	NA	NA
ACCTGTCCAAGAAGTAAAGA	neStops	+	chrI	79201	79223	YAL035W	FUN12	2775	2797	FALSE	925	933	QPVQEVKKG	QPV*EVKKG	Q928*	NA	NA	coding	stop	NA	NA
ACCTTCCACAGTTCTGCTTC	neStops	+	chrII	638108	638130	YBR208C	DUR1,2	4081	4103	FALSE	1361	1368	PEAELWKV	PEAEL*KV	W1366*	NA	NA	coding	stop	NA	NA
ACCTTTCAGCTACAAAAGTT	neStops	-	chrII	116057	116079	YBL055C	YBL055C	751	773	FALSE	251	258	TFQLQKLG	TF*LQKLG	Q253*	NA	NA	coding	stop	NA	NA
ACCTTTCCAAATTATTAGAG	neStops	+	chrXV	590053	590075	YOR141C	ARP8	2513	2535	FALSE	838	845	PALIIWKG	PALII*KG	W843*	NA	NA	coding	stop	NA	NA
ACGAAAGCAAAAATATTTAG	neStops	+	chrXIII	350818	350840	YMR040W	YET2	438	460	FALSE	146	154	RRKQKYLEE	RRK*KYLEE	Q149*	NA	NA	coding	stop	NA	NA
ACGAACAGCCTATGAGGGTA	neStops	+	chrXIII	93070	93092	YML088W	UFO1	836	858	FALSE	279	286	DEQPMRVR	DE*PMRVR	Q281*	NA	NA	coding	stop	NA	NA
ACGAACGCGAGGGCATGGGC	neStops	-	chrV	389944	389966	YER113C	TMN3	87	109	FALSE	29	37	SRTRGHGQE	SRM*GHGQE	T31M	R32*	NA	coding	stop	c(0.206, NA)	0.206
ACGAAGCCAGGGACGTATAA	neStops	-	chrII	73120	73142	YBL080C	PET112	1554	1576	FALSE	518	526	RRSQGRIKA	RRS*GRIKA	Q521*	NA	NA	coding	stop	NA	NA
ACGACAAAATGCGATCAAAA	neStops	-	chrIV	1420694	1420716	YDR482C	CWC21	123	145	FALSE	41	49	QRQNAIKKA	QR*NAIKKA	Q43*	NA	NA	coding	stop	NA	NA
ACGACCACATATATGGAACG	neStops	+	chrXVI	164041	164063	YPL205C	YPL205C	204	226	FALSE	68	76	NHVPYMWSC	NHVPYI*SC	M73I	W74*	NA	coding	stop	c(-4, NA)	4
ACGAGCAAAAGAGGCTCGAG	neStops	+	chrXV	494043	494065	YOR091W	TMA46	611	633	FALSE	204	211	NEQKRLER	NE*KRLER	Q206*	NA	NA	coding	stop	NA	NA
ACGATCAAGTGAGATTCAAG	neStops	-	chrIV	1424895	1424917	YDR485C	VPS72	2291	2313	FALSE	764	771	DDQVRFKW	DD*VRFKW	Q766*	NA	NA	coding	stop	NA	NA
ACGATCCAGCAAATGACGTT	neStops	-	chrXI	188471	188493	YKL135C	APL2	148	170	FALSE	50	57	TIQQMTLG	TI*QMTLG	Q52*	NA	NA	coding	stop	NA	NA
ACGCAAAAAGGACTTATAAT	neStops	+	chrIV	1033735	1033757	YDR285W	ZIP1	1300	1322	FALSE	434	441	TQKGLIMG	T*KGLIMG	Q435*	NA	NA	coding	stop	NA	NA
ACGCAAACAGTGAAGAGGTT	neStops	+	chrII	150059	150081	YBL037W	APL3	2851	2873	FALSE	951	958	TQTVKRLG	T*IVKRLG	Q952*	T953I	NA	coding	stop	c(NA, -1.025)	1.025
ACGCAACGCGATAATACTGT	neStops	-	chrVI	22096	22118	YFL054C	AQY3	670	692	FALSE	224	231	TQRDNTVG	T*CDNTVG	Q225*	R226C	NA	coding	stop	c(NA, -2.372)	2.372
ACGCAATTGGATATACGTAC	neStops	-	chrIV	495514	495536	YDR027C	VPS54	1783	1805	FALSE	595	602	TQLDIRTG	T*LDIRTG	Q596*	NA	NA	coding	stop	NA	NA
ACGCACAAGATACAGTCGAC	neStops	+	chrV	234676	234698	YER041W	YEN1	2216	2238	FALSE	739	746	DAQDTVDR	DV*DTVDR	A740V	Q741*	NA	coding	stop	c(-0.578, NA)	0.578
ACGCAGAAAGCTTTGATGAA	neStops	-	chrII	51986	52008	YBL088C	TEL1	7375	7397	FALSE	2459	2466	TQKALMKG	T*KALMKG	Q2460*	NA	NA	coding	stop	NA	NA
ACGCAGAAGGCCCCACATGC	neStops	+	chrI	48579	48601	YAL051W	OAF1	16	38	FALSE	6	13	TQKAPHAG	T*KAPHAG	Q7*	NA	NA	coding	stop	NA	NA
ACGCATCAACTTCTTCATGA	neStops	-	chrXI	160498	160520	YKL155C	RSM22	823	845	FALSE	275	282	THQLLHDG	TY*LLHDG	H276Y	Q277*	NA	coding	stop	c(-5.833, NA)	5.833
ACGCCAAAAATTCAACGTTG	neStops	-	chrXII	630954	630976	YLR247C	IRC20	2379	2401	FALSE	793	801	IRQKFNVED	IR*KFNVED	Q795*	NA	NA	coding	stop	NA	NA
ACGCCAAAGAGAAGCGAAAG	neStops	+	chrXI	258677	258699	YKL097C	YKL097C	215	237	FALSE	72	79	PTFASLWR	PTFASL*R	W78*	NA	NA	coding	stop	NA	NA
ACGCCACAAACGGGCGCCAC	neStops	-	chrVII	271874	271896	YGL126W	SCS3	878	900	FALSE	293	300	TCGARLWR	TCGARL*R	W299*	NA	NA	coding	stop	NA	NA
ACGCCCAAATCCTGGCTTTA	neStops	+	chrIX	134889	134911	YIL120W	QDR1	473	495	FALSE	158	165	YAQILALR	YV*ILALR	A159V	Q160*	NA	coding	stop	c(-2.963, NA)	2.963
ACGCCCACGACGGTGTGTAA	neStops	+	chrI	111769	111791	YAL021C	CCR4	1569	1591	FALSE	523	531	YRYTPSWAL	YRYTPS*TL	W529*	A530T	NA	coding	stop	c(NA, -3.531)	3.531
ACGCCTCAGGCAACTCTTGA	neStops	-	chrVII	407290	407312	YGL049C	TIF4632	2293	2315	FALSE	765	772	TPQATLEG	TF*ATLEG	P766F	Q767*	NA	coding	stop	c(-4.1, NA)	4.1
ACGCTGCAACCGAGGATTGG	neStops	+	chrXII	779266	779288	YLR324W	PEX30	52	74	FALSE	18	25	TLQPRIGG	TL*PRIGG	Q20*	NA	NA	coding	stop	NA	NA
ACGGAACAGGTACGCGGTTA	neStops	+	chrVII	997412	997434	YGR252W	GCN5	544	566	FALSE	182	189	TEQVRGYG	TE*VRGYG	Q184*	NA	NA	coding	stop	NA	NA
ACGGACCAAATAGAGATGGC	neStops	+	chrXI	33308	33330	YKL213C	DOA1	778	800	FALSE	260	267	PAISIWSV	PAISI*SV	W265*	NA	NA	coding	stop	NA	NA
ACGGACCATAAATCAACCGC	neStops	+	chrXVI	473656	473678	YPL042C	SSN3	1030	1052	FALSE	344	351	PAVDLWSV	PAVDL*SV	W349*	NA	NA	coding	stop	NA	NA
ACGGCAATTAAAGCCTAGCT	neStops	-	chrVII	54605	54627	YGL236C	MTO1	1170	1192	FALSE	390	398	PRQLKPSLE	PR*LKPSLE	Q392*	NA	NA	coding	stop	NA	NA
ACGGGACGAATCAACCATCT	neStops	-	chrVII	153363	153385	YGL185C	YGL185C	922	944	FALSE	308	315	TGRINHLG	TG*INHLG	R310*	NA	NA	coding	stop	NA	NA
ACGGTCAAATGGAAATGGCA	neStops	-	chrVII	612639	612661	YGR061C	ADE6	3305	3327	FALSE	1102	1109	NGQMEMAW	NG*MEMAW	Q1104*	NA	NA	coding	stop	NA	NA
ACGGTCAAGATACTAATAAT	neStops	-	chrIV	613483	613505	YDR084C	TVP23	500	522	FALSE	167	174	DGQDTNNW	DG*DTNNW	Q169*	NA	NA	coding	stop	NA	NA
ACGGTCAGAAATCAAGGTTA	neStops	-	chrXVI	240127	240149	YPL164C	MLH3	1349	1371	FALSE	450	457	DGQKSRLR	DG*KSRLR	Q452*	NA	NA	coding	stop	NA	NA
ACGTACAAGAGGGCAAGGCA	neStops	-	chrIV	1460103	1460125	YDR506C	GMC1	1430	1452	FALSE	477	484	DVQEGKAW	DV*EGKAW	Q479*	NA	NA	coding	stop	NA	NA
ACGTAGTCAAAAGTTCGATT	neStops	-	chrVII	176612	176634	YGL173C	XRN1	3480	3502	FALSE	1160	1168	LRSQKFDLG	LRS*KFDLG	Q1163*	NA	NA	coding	stop	NA	NA
ACGTCAACAAAAAATTATCA	neStops	+	chrXVI	455953	455975	YPL054W	LEE1	195	217	FALSE	65	73	SRQQKIIME	SR**KIIME	Q67*	Q68*	NA	coding	stop	c(NA, NA)	NA
ACGTCAATATGAAGGTTCTG	neStops	-	chrIV	523780	523802	YDR036C	EHD3	912	934	FALSE	304	312	LRQYEGSAE	LR*YEGSAE	Q306*	NA	NA	coding	stop	NA	NA
ACGTCCAAGAACTAAATGAA	neStops	-	chrXVI	537776	537798	YPL009C	RQC2	1139	1161	FALSE	380	387	DVQELNER	DV*ELNER	Q382*	NA	NA	coding	stop	NA	NA
ACGTCCAGTATTGTGCGTCG	neStops	+	chrII	732836	732858	YBR260C	RGD1	1782	1804	FALSE	594	602	LPDAQYWTL	LPDAQY*TL	W600*	NA	NA	coding	stop	NA	NA
ACGTCCATATGTTTGGCCAG	neStops	+	chrXVI	43414	43436	YPL264C	YPL264C	909	931	FALSE	303	311	HHWPNIWTW	HHWPNI*TW	W309*	NA	NA	coding	stop	NA	NA
ACGTCCCATTTAGAAAAATC	neStops	-	chrII	791788	791810	YBR294W	SUL1	2554	2576	FALSE	852	859	PDFSKWDV	PDFSK*NV	W857*	D858N	NA	coding	stop	c(NA, -3.101)	3.101
ACGTTCAAAGTTTACTTGGC	neStops	-	chrIX	275171	275193	YIL042C	PKP1	1100	1122	FALSE	367	374	DVQSLLGW	DV*SLLGW	Q369*	NA	NA	coding	stop	NA	NA
ACGTTCTCCAGTGGTTGAGG	neStops	+	chrX	35922	35944	YJL212C	OPT1	306	328	FALSE	102	110	IRLNHWRTW	IRLNH*KTW	W107*	R108K	NA	coding	stop	c(NA, -2.825)	2.825
ACTAAACAGACGGGAATAGC	neStops	-	chrVII	978940	978962	YGR244C	LSC2	358	380	FALSE	120	127	TKQTGIAG	TK*TGIAG	Q122*	NA	NA	coding	stop	NA	NA
ACTACAAAAGGCAAGGAACT	neStops	-	chrXI	465756	465778	YKR014C	YPT52	294	316	FALSE	98	106	SLQKARNWV	SL*KARNWV	Q100*	NA	NA	coding	stop	NA	NA
ACTACAAATAGTGCCATTAC	neStops	+	chrVII	520098	520120	YGR014W	MSB2	3156	3178	FALSE	1052	1060	VLQIVPLQD	VL*IVPLQD	Q1054*	NA	NA	coding	stop	NA	NA
ACTACAACCTATAACATCCA	neStops	+	chrIV	1136888	1136910	YDR334W	SWR1	957	979	FALSE	319	327	SLQPITSKE	SL*SITSKE	Q321*	P322S	NA	coding	stop	c(NA, -3.378)	3.378
ACTACAAGGTTCATCGTCCG	neStops	-	chrX	142201	142223	YJL147C	MRX5	345	367	FALSE	115	123	ELQGSSSED	EL*GSSSED	Q117*	NA	NA	coding	stop	NA	NA
ACTACAGAATAGTTCACTAC	neStops	+	chrVII	742810	742832	YGR125W	YGR125W	486	508	FALSE	162	170	GLQNSSLPE	GL*NSSLPE	Q164*	NA	NA	coding	stop	NA	NA
ACTACAGATTGCCTGTGACA	neStops	+	chrIX	152593	152615	YIL112W	HOS4	999	1021	FALSE	333	341	RLQIACDKG	RL*IACDKG	Q335*	NA	NA	coding	stop	NA	NA
ACTACATCAACAACAGGAAC	neStops	+	chrII	76701	76723	YBL079W	NUP170	1443	1465	FALSE	481	489	LLHQQQEQA	LLY*QQEQA	H483Y	Q484*	NA	coding	stop	c(-0.836, NA)	0.836
ACTACCAAATTAGTGGTAAG	neStops	+	chrVIII	106887	106909	YHR001W	OSH7	833	855	FALSE	278	285	YYQISGKW	YY*ISGKW	Q280*	NA	NA	coding	stop	NA	NA
ACTACCAGGGTTTGATGTGG	neStops	-	chrXII	953458	953480	YLR414C	PUN1	665	687	FALSE	222	229	NYQGLMWG	NY*GLMWG	Q224*	NA	NA	coding	stop	NA	NA
ACTACGAGAAGAAAATCGAT	neStops	+	chrXV	778134	778156	YOR233W	KIN4	2289	2311	FALSE	763	771	TLREENRSE	TL*EENRSE	R765*	NA	NA	coding	stop	NA	NA
ACTACGTCAGTCGGAGCAGC	neStops	-	chrVII	846153	846175	YGR174C	CBP4	231	253	FALSE	77	85	KLRQSEQQA	KLC*SEQQA	R79C	Q80*	NA	coding	stop	c(-7.979, NA)	7.979
ACTAGAACAGGGATTATTAC	neStops	-	chrIV	496289	496311	YDR027C	VPS54	1008	1030	FALSE	336	344	KLEQGLLQA	KLE*GLLQA	Q339*	NA	NA	coding	stop	NA	NA
ACTAGTGCAAACAGCAATTA	neStops	-	chrXVI	217166	217188	YPL176C	TRE1	1176	1198	FALSE	392	400	LLVQTAIRE	LLV*TAIRE	Q395*	NA	NA	coding	stop	NA	NA
ACTATTCCAAAATCTTCTAA	neStops	-	chrVII	977361	977383	YGR243W	MPC3	26	48	FALSE	9	16	AFRRFWNS	AFRRF*NS	W14*	NA	NA	coding	stop	NA	NA
ACTCAAAAAATCGGGACAGT	neStops	-	chrVII	638513	638535	YGR077C	PEX8	979	1001	FALSE	327	334	TQKIGTVG	T*KIGTVG	Q328*	NA	NA	coding	stop	NA	NA
ACTCAAAAAGAGATGCTATA	neStops	-	chrXIII	523218	523240	YMR127C	SAS2	106	128	FALSE	36	43	TQKEMLYG	T*KEMLYG	Q37*	NA	NA	coding	stop	NA	NA
ACTCAAAAAGTTAGCAAGAA	neStops	-	chrXII	633197	633219	YLR247C	IRC20	136	158	FALSE	46	53	TQKVSKNG	T*KVSKNG	Q47*	NA	NA	coding	stop	NA	NA
ACTCAAAATAATGGGGCATT	neStops	+	chrXI	310415	310437	YKL068W	NUP100	217	239	FALSE	73	80	TQNNGAFG	T*NNGAFG	Q74*	NA	NA	coding	stop	NA	NA
ACTCAAACTGGTTCTGCCTG	neStops	-	chrXVI	353695	353717	YPL105C	SYH1	1696	1718	FALSE	566	573	TQTGSAWG	T*IGSAWG	Q567*	T568I	NA	coding	stop	c(NA, -0.533)	0.533
ACTCAACTGCAAATCGCCAT	neStops	-	chrXIII	682561	682583	YMR207C	HFA1	982	1004	FALSE	328	335	TQLQIAMG	T*LQIAMG	Q329*	NA	NA	coding	stop	NA	NA
ACTCAAGAGGAAATTGAGAA	neStops	+	chrXII	256389	256411	YLR057W	MNL2	1084	1106	FALSE	362	369	TQEEIENG	T*EEIENG	Q363*	NA	NA	coding	stop	NA	NA
ACTCAAGATTTAATAAATGA	neStops	+	chrV	188976	188998	YER016W	BIM1	700	722	FALSE	234	241	TQDLINEG	T*DLINEG	Q235*	NA	NA	coding	stop	NA	NA
ACTCAAGCCTACTTAACCAT	neStops	+	chrXIII	752327	752349	YMR241W	YHM2	367	389	FALSE	123	130	TQAYLTMG	T*VYLTMG	Q124*	A125V	NA	coding	stop	c(NA, -3.892)	3.892
ACTCAATTATTGAACCATAA	neStops	+	chrXII	772699	772721	YLR320W	MMS22	760	782	FALSE	254	261	TQLLNHKG	T*LLNHKG	Q255*	NA	NA	coding	stop	NA	NA
ACTCAATTGAGGTTGAAGCG	neStops	+	chrXIV	607663	607685	YNL014W	HEF3	1345	1367	FALSE	449	456	TQLRLKRG	T*LRLKRG	Q450*	NA	NA	coding	stop	NA	NA
ACTCAATTTAGAGACTGTTT	neStops	-	chrXI	543043	543065	YKR054C	DYN1	4861	4883	FALSE	1621	1628	TQFRDCLG	T*FRDCLG	Q1622*	NA	NA	coding	stop	NA	NA
ACTCAGATCACAGCTCTTTC	neStops	+	chrIX	344290	344312	YIL006W	YIA6	229	251	FALSE	77	84	TQITALSG	T*ITALSG	Q78*	NA	NA	coding	stop	NA	NA
ACTCAGATGACACGATTCTT	neStops	+	chrII	110795	110817	YBL059W	YBL059W	202	224	FALSE	68	75	TQMTRFFG	T*MTRFFG	Q69*	NA	NA	coding	stop	NA	NA
ACTCAGCCAACGGAAAAAGT	neStops	+	chrXII	138900	138922	YLL005C	SPO75	1625	1647	FALSE	542	549	PYFFRWLS	PYFFR*LS	W547*	NA	NA	coding	stop	NA	NA
ACTCAGTACGTCAACGCAGA	neStops	+	chrXI	519641	519663	YKR042W	UTH1	115	137	FALSE	39	46	TQYVNADG	T*YVNADG	Q40*	NA	NA	coding	stop	NA	NA
ACTCAGTTGGCCAAGCAGAC	neStops	-	chrXV	202154	202176	YOL067C	RTG1	343	365	FALSE	115	122	TQLAKQTG	T*LAKQTG	Q116*	NA	NA	coding	stop	NA	NA
ACTCCAAATATTTGCACTCG	neStops	+	chrXVI	653159	653181	YPR042C	PUF2	482	504	FALSE	161	168	ATSANIWS	ATSANI*S	W167*	NA	NA	coding	stop	NA	NA
ACTCCAAGAATCTATTGTCT	neStops	+	chrVIII	306891	306913	YHR099W	TRA1	4131	4153	FALSE	1377	1385	LLQESIVLA	LL*ESIVLA	Q1379*	NA	NA	coding	stop	NA	NA
ACTCCACAAGTGACGGAACA	neStops	-	chrXV	214687	214709	YOL060C	MAM3	1429	1451	FALSE	477	484	TPQVTEHG	TL*VTEHG	P478L	Q479*	NA	coding	stop	c(-1.242, NA)	1.242
ACTCCAGATGTACAAGTCAA	neStops	+	chrVIII	206007	206029	YHR048W	YHK8	1401	1423	FALSE	467	475	GLQMYKSMG	GL*MYKSMG	Q469*	NA	NA	coding	stop	NA	NA
ACTCCAGCATTGCGTAGAAA	neStops	-	chrIX	417826	417848	YIR033W	MGA2	1703	1725	FALSE	568	575	ALSTQCWS	ALSTQY*S	C573Y	W574*	NA	coding	stop	c(-10.457, NA)	10.457
ACTCCAGGACTTGGTTCAGT	neStops	+	chrIV	173041	173063	YDL159W	STE7	561	583	FALSE	187	195	QLQDLVQLG	QL*DLVQLG	Q189*	NA	NA	coding	stop	NA	NA
ACTCCATTTGGACTCTACCA	neStops	+	chrXVI	684078	684100	YPR068C	HOS1	254	276	FALSE	85	92	PMVESKWS	PMVESK*S	W91*	NA	NA	coding	stop	NA	NA
ACTCCCCAAACCGGTGATGA	neStops	+	chrXIII	518716	518738	YMR125W	STO1	856	878	FALSE	286	293	TPQTGDEG	TF*TGDEG	P287F	Q288*	NA	coding	stop	c(-2.311, NA)	2.311
ACTCGAAAAGCAATTGAAAC	neStops	-	chrVI	22603	22625	YFL054C	AQY3	163	185	FALSE	55	62	TRKAIETG	T*KAIETG	R56*	NA	NA	coding	stop	NA	NA
ACTCGATCAAATGCTTAGTA	neStops	-	chrXVI	345709	345731	YPL109C	YPL109C	1659	1681	FALSE	553	561	LLDQMLSMV	LLD*MLSMV	Q556*	NA	NA	coding	stop	NA	NA
ACTCGCAGGAATTAGACATC	neStops	+	chrXVI	647627	647649	YPR040W	TIP41	323	345	FALSE	108	115	NSQELDIW	NL*ELDIW	S109L	Q110*	NA	coding	stop	c(-5, NA)	5
ACTCTCAACCAATGTCACCA	neStops	+	chrXIII	676566	676588	YMR206W	YMR206W	671	693	FALSE	224	231	NSQPMSPR	NF*PMSPR	S225F	Q226*	NA	coding	stop	c(-0.353, NA)	0.353
ACTCTCAGGAACAAATTGCA	neStops	+	chrXVI	755421	755443	YPR115W	RGC1	545	567	FALSE	182	189	YSQEQIAR	YF*EQIAR	S183F	Q184*	NA	coding	stop	c(-3.469, NA)	3.469
ACTCTCAGTTCCAAGAAATA	neStops	-	chrX	115021	115043	YJL162C	JJJ2	587	609	FALSE	196	203	NSQFQEIW	NF*FQEIW	S197F	Q198*	NA	coding	stop	c(-1.028, NA)	1.028
ACTCTCCAAAAAGGTAATAA	neStops	-	chrXVI	379976	379998	YPL089C	RLM1	1153	1175	FALSE	385	392	TLQKGNNG	TF*KGNNG	L386F	Q387*	NA	coding	stop	c(-0.311, NA)	0.311
ACTGAGCCAGCCCTCTATCA	neStops	-	chrIV	1313802	1313824	YDR421W	ARO80	1763	1785	FALSE	588	595	PLIEGWLS	PLIEG*LS	W593*	NA	NA	coding	stop	NA	NA
ACTGCAAGACTTCCATCTGC	neStops	+	chrVII	654753	654775	YGR088W	CTT1	120	142	FALSE	40	48	LLQDFHLLE	LL*DFHLLE	Q42*	NA	NA	coding	stop	NA	NA
ACTGCAGAAATTAAATGATT	neStops	-	chrIV	724869	724891	YDR135C	YCF1	2661	2683	FALSE	887	895	QLQKLNDLD	QL*KLNDLD	Q889*	NA	NA	coding	stop	NA	NA
ACTGCAGCAGAGGTCTTTAG	neStops	+	chrVII	501454	501476	YGR003W	CUL3	1323	1345	FALSE	441	449	LLQQRSLVE	LL**RSLVE	Q443*	Q444*	NA	coding	stop	c(NA, NA)	NA
ACTGCAGCCATTAACTGATA	neStops	-	chrVI	136209	136231	YFL003C	MSH4	927	949	FALSE	309	317	ILQPLTDRG	IL*SLTDRG	Q311*	P312S	NA	coding	stop	c(NA, -8)	8
ACTGCTCAAGAGTTTGTTAA	neStops	-	chrXIII	127071	127093	YML072C	TCB3	2275	2297	FALSE	759	766	TAQEFVKG	TV*EFVKG	A760V	Q761*	NA	coding	stop	c(-2.6, NA)	2.6
ACTGGCAAACTTGGCAATGG	neStops	-	chrIV	385237	385259	YDL037C	BSC1	329	351	FALSE	110	117	YWQTWQWG	YW*TWQWG	Q112*	NA	NA	coding	stop	NA	NA
ACTGGCCAGAGAGGGCAGCA	neStops	+	chrIV	806681	806703	YDR171W	HSP42	61	83	FALSE	21	28	TGQRGQQG	TG*RGQQG	Q23*	NA	NA	coding	stop	NA	NA
ACTGGCTCAAATGATCAAAT	neStops	+	chrXIV	214510	214532	YNL233W	BNI4	2589	2611	FALSE	863	871	QLAQMIKLE	QLV*MIKLE	A865V	Q866*	NA	coding	stop	c(-3.833, NA)	3.833
ACTGGGACAAGAAGCACAAT	neStops	-	chrIX	168405	168427	YIL105C	SLM1	1215	1237	FALSE	405	413	LLGQEAQLV	LLG*EAQLV	Q408*	NA	NA	coding	stop	NA	NA
ACTGGTACAACTGTCTGCAG	neStops	+	chrIX	178825	178847	YIL099W	SGA1	822	844	FALSE	274	282	LLVQLSAVD	LLV*LSAVD	Q277*	NA	NA	coding	stop	NA	NA
ACTGGTTCAAGAGCTCTCTC	neStops	-	chrV	54092	54114	YEL053C	MAK10	1989	2011	FALSE	663	671	RLVQELSLE	RLV*ELSLE	Q666*	NA	NA	coding	stop	NA	NA
ACTGTACAGAAATGGATATC	neStops	+	chrIV	659844	659866	YDR103W	STE5	1495	1517	FALSE	499	506	TVQKWISG	TV*KWISG	Q501*	NA	NA	coding	stop	NA	NA
ACTGTACGAGATTCAAATGG	neStops	+	chrXI	205944	205966	YKL126W	YPK1	238	260	FALSE	80	87	TVRDSNGG	TV*DSNGG	R82*	NA	NA	coding	stop	NA	NA
ACTGTCAATCGCAAGTAAGC	neStops	+	chrVII	44322	44344	YGL243W	TAD1	1016	1038	FALSE	339	346	HCQSQVSR	HC*SQVSR	Q341*	NA	NA	coding	stop	NA	NA
ACTGTGCAACTAAATACGCG	neStops	+	chrVII	461858	461880	YGL016W	KAP122	193	215	FALSE	65	72	TVQLNTRG	TV*LNTRG	Q67*	NA	NA	coding	stop	NA	NA
ACTTAACCATAAACAGTTAC	neStops	-	chrVII	1013758	1013780	YGR260W	TNA1	1274	1296	FALSE	425	432	ACNCLWLS	ACNCL*LS	W430*	NA	NA	coding	stop	NA	NA
ACTTCAAAGGAGTGAATACT	neStops	-	chrXII	338090	338112	YLR098C	CHA4	1362	1384	FALSE	454	462	LLQRSEYLA	LL*RSEYLA	Q456*	NA	NA	coding	stop	NA	NA
ACTTCAACCATGCATTTATA	neStops	-	chrXIII	310960	310982	YMR018W	PEX9	753	775	FALSE	251	259	SHINAWLKL	SHINA*LKL	W256*	NA	NA	coding	stop	NA	NA
ACTTCAGGGCCAGTCGTACC	neStops	-	chrXI	161117	161139	YKL155C	RSM22	204	226	FALSE	68	76	TLQGQSYRD	TL*GQSYRD	Q70*	NA	NA	coding	stop	NA	NA
ACTTCCACTCACCAGTTAAT	neStops	+	chrXIII	252105	252127	YML008C	ERG6	864	886	FALSE	288	296	YPLTGEWKY	YPLTGE*KY	W294*	NA	NA	coding	stop	NA	NA
ACTTCCATGAGTCGATGATC	neStops	-	chrVIII	196093	196115	YHR045W	YHR045W	543	565	FALSE	181	189	VLIIDSWKS	VLIIDS*KS	W187*	NA	NA	coding	stop	NA	NA
ACTTGCAGTCATTGAATAGC	neStops	-	chrXIII	522398	522420	YMR127C	SAS2	926	948	FALSE	309	316	YLQSLNSW	YL*SLNSW	Q311*	NA	NA	coding	stop	NA	NA
ACTTGCGACGGCCACTGAAA	neStops	-	chrII	682434	682456	YBR231C	SWC5	635	657	FALSE	212	219	HLRRPLKR	HL*RPLKR	R214*	NA	NA	coding	stop	NA	NA
ACTTGTTCCATGCAGAAGAT	neStops	+	chrIV	642907	642929	YDR097C	MSH6	909	931	FALSE	303	311	IPSSAWNKF	IPSSA*NKF	W308*	NA	NA	coding	stop	NA	NA
ACTTTGCAACTAGCTAAGGT	neStops	-	chrXIV	618015	618037	YNL008C	ASI3	205	227	FALSE	69	76	TLQLAKVG	TL*LAKVG	Q71*	NA	NA	coding	stop	NA	NA
ACTTTGCAATATCTAAATAT	neStops	+	chrXII	832118	832140	YLR352W	YLR352W	1003	1025	FALSE	335	342	TLQYLNIG	TL*YLNIG	Q337*	NA	NA	coding	stop	NA	NA
ACTTTGCAATTTGGTAAGTA	neStops	+	chrII	146388	146410	YBL038W	MRPL16	202	224	FALSE	68	75	TLQFGKYG	TL*FGKYG	Q70*	NA	NA	coding	stop	NA	NA
AGAAACAATGGCTGACAGCC	neStops	+	chrVIII	342071	342093	YHR116W	COX23	407	429	FALSE	136	143	KKQWLTAR	KK*WLTAR	Q138*	NA	NA	coding	stop	NA	NA
AGAAAGCAAAGTAATAACTG	neStops	+	chrXII	85818	85840	YLL028W	TPO1	1015	1037	FALSE	339	346	RKQSNNWG	RK*SNNWG	Q341*	NA	NA	coding	stop	NA	NA
AGAAAGCAGTGCCCAGTATG	neStops	-	chrXVI	584807	584829	YPR013C	CMR3	757	779	FALSE	253	260	RKQCPVCG	RK*CPVCG	Q255*	NA	NA	coding	stop	NA	NA
AGAAAGCAGTTGAACGAGGA	neStops	-	chrXI	403665	403687	YKL018C-A	YKL018C-A	193	215	FALSE	65	72	RKQLNEDG	RK*LNEDG	Q67*	NA	NA	coding	stop	NA	NA
AGAAAGTCAATGTAATATTA	neStops	-	chrXVI	220859	220881	YPL174C	NIP100	1893	1915	FALSE	631	639	SESQCNIKE	SES*CNIKE	Q634*	NA	NA	coding	stop	NA	NA
AGAAATACAGGAACAGCAGA	neStops	+	chrIX	362801	362823	YIR003W	AIM21	1917	1939	FALSE	639	647	TEIQEQQME	TEI*EQQME	Q642*	NA	NA	coding	stop	NA	NA
AGAAATCAACGTGACAATCT	neStops	+	chrVI	198375	198397	YFR022W	ROG3	1543	1565	FALSE	515	522	RNQRDNLG	RN*RDNLG	Q517*	NA	NA	coding	stop	NA	NA
AGAAATCCAAACCGACGATG	neStops	+	chrI	35217	35239	YAL060W	BDH1	63	85	FALSE	21	29	PEIQTDDEV	PEI*TDDEV	Q24*	NA	NA	coding	stop	NA	NA
AGAAATTCAAAACCCAAGGT	neStops	-	chrXIII	755827	755849	YMR243C	ZRC1	318	340	FALSE	106	114	QEIQNPRLV	QEI*NPRLV	Q109*	NA	NA	coding	stop	NA	NA
AGAACAAAAATGGAGAAGCA	neStops	+	chrXII	257597	257619	YLR057W	MNL2	2292	2314	FALSE	764	772	GEQKWRSMG	GE*KWRSMG	Q766*	NA	NA	coding	stop	NA	NA
AGAACAAAACGCTCACGTCA	neStops	-	chrXIII	471110	471132	YMR102C	YMR102C	1221	1243	FALSE	407	415	QEQNAHVMV	QE*NAHVMV	Q409*	NA	NA	coding	stop	NA	NA
AGAACAAAAGATTGTTAAGA	neStops	-	chrIX	256282	256304	YIL052C	RPL34B	288	310	FALSE	96	104	EEQKIVKKV	EE*KIVKKV	Q98*	NA	NA	coding	stop	NA	NA
AGAACAAACCGTTCATCGGG	neStops	+	chrVII	602899	602921	YGR056W	RSC1	1239	1261	FALSE	413	421	PEQTVHRVD	PE*TVHRVD	Q415*	NA	NA	coding	stop	NA	NA
AGAACAAAGAAGACAAAGAA	neStops	-	chrIV	767170	767192	YDR153C	ENT5	780	802	FALSE	260	268	EEQRRQRRE	EE*RRQRRE	Q262*	NA	NA	coding	stop	NA	NA
AGAACAAGCGCATAATGAAA	neStops	+	chrXIV	453091	453113	YNL091W	NST1	684	706	FALSE	228	236	QEQAHNETA	QE*AHNETA	Q230*	NA	NA	coding	stop	NA	NA
AGAACAAGCTGAGAAGAAGG	neStops	-	chrXV	737234	737256	YOR209C	NPT1	471	493	FALSE	157	165	LEQAEKKAE	LE*AEKKAE	Q159*	NA	NA	coding	stop	NA	NA
AGAACAAGGCGATGCATTAC	neStops	+	chrIV	694070	694092	YDR121W	DPB4	486	508	FALSE	162	170	EEQGDALQD	EE*GDALQD	Q164*	NA	NA	coding	stop	NA	NA
AGAACAAGTCGAAAATGCTG	neStops	-	chrXII	837099	837121	YLR354C	TAL1	237	259	FALSE	79	87	EEQVENAVD	EE*VENAVD	Q81*	NA	NA	coding	stop	NA	NA
AGAACAAGTTGTCTGGTCTT	neStops	-	chrVIII	185969	185991	YHR039C	MSC7	819	841	FALSE	273	281	SEQVVWSSE	SE*VVWSSE	Q275*	NA	NA	coding	stop	NA	NA
AGAACAATGGGGCATACCCG	neStops	+	chrXVI	361447	361469	YPL101W	ELP4	1239	1261	FALSE	413	421	IEQWGIPVD	IE*WGIPVD	Q415*	NA	NA	coding	stop	NA	NA
AGAACAATTAAATAGCGTTG	neStops	-	chrXI	111546	111568	YKL179C	COY1	936	958	FALSE	312	320	KEQLNSVVA	KE*LNSVVA	Q314*	NA	NA	coding	stop	NA	NA
AGAACAATTCTATAAAGAGC	neStops	+	chrX	282732	282754	YJL082W	IML2	1548	1570	FALSE	516	524	KEQFYKERA	KE*FYKERA	Q518*	NA	NA	coding	stop	NA	NA
AGAACAATTGGAAAAGGTAG	neStops	-	chrVII	955372	955394	YGR233C	PHO81	2817	2839	FALSE	939	947	KEQLEKVVD	KE*LEKVVD	Q941*	NA	NA	coding	stop	NA	NA
AGAACAGAAAAAATTATCAC	neStops	-	chrXIV	270874	270896	YNL196C	SLZ1	276	298	FALSE	92	100	KEQKKLSLA	KE*KKLSLA	Q94*	NA	NA	coding	stop	NA	NA
AGAACAGAAATGGATCGATA	neStops	-	chrIV	588862	588884	YDR071C	PAA1	519	541	FALSE	173	181	AEQKWIDME	AE*KWIDME	Q175*	NA	NA	coding	stop	NA	NA
AGAACAGAAGCCAAAGAGAG	neStops	+	chrXI	251385	251407	YKL101W	HSL1	2466	2488	FALSE	822	830	EEQKPKRAA	EE*KPKRAA	Q824*	NA	NA	coding	stop	NA	NA
AGAACAGCAACAGGGCACTG	neStops	-	chrV	209776	209798	YER027C	GAL83	435	457	FALSE	145	153	QEQQQGTVE	QE**QGTVE	Q147*	Q148*	NA	coding	stop	c(NA, NA)	NA
AGAACAGCACTATATCTTAT	neStops	+	chrXV	711189	711211	YOR193W	PEX27	744	766	FALSE	248	256	KEQHYILWE	KE*YYILWE	Q250*	H251Y	NA	coding	stop	c(NA, -1.746)	1.746
AGAACAGCTCAGTGCAGATG	neStops	-	chrIV	374095	374117	YDL044C	MTF2	1173	1195	FALSE	391	399	GEQLSADEE	GE*FSADEE	Q393*	L394F	NA	coding	stop	c(NA, -0.011)	0.011
AGAACAGGATTCTCCAGTGT	neStops	-	chrVII	192385	192407	YGL164C	YRB30	894	916	FALSE	298	306	EEQDSPVLV	EE*DSPVLV	Q300*	NA	NA	coding	stop	NA	NA
AGAACAGTACGAAAAGACAC	neStops	-	chrI	57964	57986	YAL044C	GCV3	477	499	FALSE	159	167	LEQYEKTLV	LE*YEKTLV	Q161*	NA	NA	coding	stop	NA	NA
AGAACCAAAACGGTGCAAAA	neStops	-	chrXIII	882178	882200	YMR306W	FKS3	1020	1042	FALSE	340	348	IHFAPFWFF	IHFAPF*FF	W346*	NA	NA	coding	stop	NA	NA
AGAACCAACACGGCAAAATT	neStops	-	chrX	438472	438494	YJR001W	AVT1	1671	1693	FALSE	557	565	CLILPCWFY	CLILPC*FY	W563*	NA	NA	coding	stop	NA	NA
AGAACCAACCTACTGGATTT	neStops	-	chrII	212707	212729	YBL007C	SLA1	3638	3660	FALSE	1213	1220	QNQPTGFG	QN*PTGFG	Q1215*	NA	NA	coding	stop	NA	NA
AGAACCACAAGGTGCCATGT	neStops	-	chrXIII	115982	116004	YML075C	HMG1	2895	2917	FALSE	965	973	LEPQGAMLD	LEL*GAMLD	P967L	Q968*	NA	coding	stop	c(-9.556, NA)	9.556
AGAACCATAAGATACCAATA	neStops	-	chrXII	86198	86220	YLL028W	TPO1	1395	1417	FALSE	465	473	FPIGILWFC	FPIGIL*FC	W471*	NA	NA	coding	stop	NA	NA
AGAACGATATCAATGGTTAG	neStops	-	chrIV	642994	643016	YDR097C	MSH6	822	844	FALSE	274	282	EERYQWLVD	EE*YQWLVD	R276*	NA	NA	coding	stop	NA	NA
AGAACTACGAAATCTAATTA	neStops	-	chrIV	857284	857306	YDR202C	RAV2	648	670	FALSE	216	224	IELRNLIKV	IEL*NLIKV	R219*	NA	NA	coding	stop	NA	NA
AGAACTGCAGGCGGACGAAG	neStops	-	chrVIII	189283	189305	YHR041C	SRB2	459	481	FALSE	153	161	IELQADEAG	IEL*ADEAG	Q156*	NA	NA	coding	stop	NA	NA
AGAAGAACAGGCGCGATTAA	neStops	+	chrX	245198	245220	YJL098W	SAP185	3117	3139	FALSE	1039	1047	EEEQARLMG	EEE*ARLMG	Q1042*	NA	NA	coding	stop	NA	NA
AGAAGACAATCATTGGACCG	neStops	+	chrVII	93001	93023	YGL211W	NCS6	490	512	FALSE	164	171	RRQSLDRG	RR*SLDRG	Q166*	NA	NA	coding	stop	NA	NA
AGAAGACAGATTCCAAAGAA	neStops	-	chrXV	660983	661005	YOR175C	ALE1	670	692	FALSE	224	231	RRQIPKNG	RR*IPKNG	Q226*	NA	NA	coding	stop	NA	NA
AGAAGAGCAGATCAATTACT	neStops	-	chrIX	30991	31013	YIL166C	YIL166C	1554	1576	FALSE	518	526	KEEQINYLD	KEE*INYLD	Q521*	NA	NA	coding	stop	NA	NA
AGAAGGCAACTAGTTGTTGT	neStops	-	chrXI	405299	405321	YKL017C	HCS1	1921	1943	FALSE	641	648	RRQLVVVG	RR*LVVVG	Q643*	NA	NA	coding	stop	NA	NA
AGAATACAATTCAACAATAA	neStops	-	chrVII	963674	963696	YGR237C	YGR237C	1960	1982	FALSE	654	661	RIQFNNNG	RI*FNNNG	Q656*	NA	NA	coding	stop	NA	NA
AGAATGCAAAGATTTCCCGT	neStops	-	chrXII	567171	567193	YLR213C	CRR1	730	752	FALSE	244	251	RMQRFPVG	RM*RFPVG	Q246*	NA	NA	coding	stop	NA	NA
AGAATGCAGAGATCTAAAAA	neStops	-	chrXV	434439	434461	YOR058C	ASE1	1885	1907	FALSE	629	636	RMQRSKKG	RM*RSKKG	Q631*	NA	NA	coding	stop	NA	NA
AGAATGCCATCTCAAGGAGG	neStops	-	chrXVI	265767	265789	YPL152W	RRD2	740	762	FALSE	247	254	SASLRWHS	SASLR*HS	W252*	NA	NA	coding	stop	NA	NA
AGACAAAAACCAGAGCACAT	neStops	+	chrXIII	903310	903332	YMR315W	YMR315W	511	533	FALSE	171	178	RQKPEHIG	R*KPEHIG	Q172*	NA	NA	coding	stop	NA	NA
AGACAAACAATCCTCCCAAA	neStops	-	chrIII	148416	148438	YCR018C	SRD1	466	488	FALSE	156	163	RQTILPNG	R*IILPNG	Q157*	T158I	NA	coding	stop	c(NA, -2)	2
AGACAAAGGAGCCCTCCCAA	neStops	-	chrXII	377006	377028	YLR114C	AVL9	211	233	FALSE	71	78	RQRSPPNG	R*RSPPNG	Q72*	NA	NA	coding	stop	NA	NA
AGACAACCAGAAAAAATTGG	neStops	+	chrV	508031	508053	YER164W	CHD1	2640	2662	FALSE	880	888	TDNQKKLED	TDN*KKLED	Q883*	NA	NA	coding	stop	NA	NA
AGACAAGAGCCGAGATTAAA	neStops	-	chrVII	242431	242453	YGL140C	YGL140C	2560	2582	FALSE	854	861	RQEPRLKG	R*EPRLKG	Q855*	NA	NA	coding	stop	NA	NA
AGACAAGAGTTACACGTGGA	neStops	-	chrX	580859	580881	YJR080C	AIM24	736	758	FALSE	246	253	RQELHVEG	R*ELHVEG	Q247*	NA	NA	coding	stop	NA	NA
AGACAAGGAAGTATCTCAAG	neStops	+	chrVIII	370399	370421	YHR132W-A	IGO2	346	368	FALSE	116	123	RQGSISSG	R*GSISSG	Q117*	NA	NA	coding	stop	NA	NA
AGACAAGTCTCTTATGAAGA	neStops	+	chrXV	515634	515656	YOR101W	RAS1	391	413	FALSE	131	138	RQVSYEDG	R*VSYEDG	Q132*	NA	NA	coding	stop	NA	NA
AGACAATATGAAAGCTCATC	neStops	-	chrXII	919810	919832	YLR399C	BDF1	1765	1787	FALSE	589	596	RQYESSSG	R*YESSSG	Q590*	NA	NA	coding	stop	NA	NA
AGACAATGGGACTATCCATT	neStops	-	chrIV	450590	450612	YDR001C	NTH1	1864	1886	FALSE	622	629	RQWDYPFG	R*WDYPFG	Q623*	NA	NA	coding	stop	NA	NA
AGACAGACTTGCGGAGGACA	neStops	+	chrVII	109535	109557	YGL205W	POX1	1378	1400	FALSE	460	467	RQTCGGHG	R*ICGGHG	Q461*	T462I	NA	coding	stop	c(NA, -2.84)	2.84
AGACAGAGACAGAGAGTGTA	neStops	-	chrVII	592117	592139	YGR050C	YGR050C	304	326	FALSE	102	109	RQRQRVYG	R*RQRVYG	Q103*	NA	NA	coding	stop	NA	NA
AGACAGCCTTTGGGTGTTTG	neStops	+	chrXV	1040374	1040396	YOR374W	ALD4	535	557	FALSE	179	186	RQPLGVCG	R*FLGVCG	Q180*	P181F	NA	coding	stop	c(NA, -10.917)	10.917
AGACAGGTATTTGGTAGTTG	neStops	-	chrXV	943201	943223	YOR330C	MIP1	163	185	FALSE	55	62	RQVFGSCG	R*VFGSCG	Q56*	NA	NA	coding	stop	NA	NA
AGACAGTTCAGTGCTAAATC	neStops	+	chrXIV	119931	119953	YNL275W	BOR1	664	686	FALSE	222	229	RQFSAKSG	R*FSAKSG	Q223*	NA	NA	coding	stop	NA	NA
AGACCAAAAGAAAGCTACGA	neStops	+	chrV	420340	420362	YER129W	SAK1	3060	3082	FALSE	1020	1028	LDQKKATTE	LD*KKATTE	Q1022*	NA	NA	coding	stop	NA	NA
AGACCAAAAGGTTGTCGACA	neStops	-	chrXIII	123328	123350	YML073C	RPL6A	408	430	FALSE	136	144	EDQKVVDKA	ED*KVVDKA	Q138*	NA	NA	coding	stop	NA	NA
AGACCAAACCAAGTCTGCCA	neStops	-	chrXIV	686572	686594	YNR032W	PPG1	563	585	FALSE	188	195	AMADLVWS	AMADLV*S	W194*	NA	NA	coding	stop	NA	NA
AGACCAACCAGCAGCGTAGA	neStops	-	chrX	121521	121543	YJL159W	HSP150	1073	1095	FALSE	358	365	AIYAAGWS	AIYAAD*S	G363D	W364*	NA	coding	stop	c(-6.821, NA)	6.821
AGACCAAGACGAGGAGTTGG	neStops	-	chrXI	525647	525669	YKR048C	NAP1	972	994	FALSE	324	332	EDQDEELEE	ED*DEELEE	Q326*	NA	NA	coding	stop	NA	NA
AGACCAAGCTAGAGATTACA	neStops	+	chrVI	107480	107502	YFL014W	HSP12	225	247	FALSE	75	83	ADQARDYMG	AD*ARDYMG	Q77*	NA	NA	coding	stop	NA	NA
AGACCAGAAGAGGCTAATAG	neStops	+	chrXV	263732	263754	YOL033W	MSE1	258	280	FALSE	86	94	TDQKRLIEG	TD*KRLIEG	Q88*	NA	NA	coding	stop	NA	NA
AGACCATAATGTTCCTGACG	neStops	-	chrXII	788115	788137	YLR330W	CHS5	452	474	FALSE	151	158	TTSGTLWS	TTSGTL*S	W157*	NA	NA	coding	stop	NA	NA
AGACCTACAAAGTTTATACC	neStops	+	chrVII	668923	668945	YGR092W	DBF2	735	757	FALSE	245	253	QDLQSLYLA	QDL*SLYLA	Q248*	NA	NA	coding	stop	NA	NA
AGACGAAATAAAAAGGAAGA	neStops	-	chrXV	127118	127140	YOL101C	IZH4	781	803	FALSE	261	268	RRNKKEEG	R*NKKEEG	R262*	NA	NA	coding	stop	NA	NA
AGACGAAGTAGAGGTGGAGC	neStops	-	chrXVI	454890	454912	YPL055C	LGE1	79	101	FALSE	27	34	RRSRGGAG	R*SRGGAG	R28*	NA	NA	coding	stop	NA	NA
AGACGAATGAGAATTCGACC	neStops	-	chrV	103998	104020	YEL025C	YEL025C	2128	2150	FALSE	710	717	RRMRIRPG	R*MRIRPG	R711*	NA	NA	coding	stop	NA	NA
AGACGAGCCCAAACTCATAA	neStops	-	chrXII	920737	920759	YLR399C	BDF1	838	860	FALSE	280	287	RRAQTHNG	R*VQTHNG	R281*	A282V	NA	coding	stop	c(NA, -2.261)	2.261
AGACGTACGAGAGCCTAAAG	neStops	+	chrIII	60537	60559	YCL036W	GFD2	1512	1534	FALSE	504	512	RDVREPKVV	RDV*EPKVV	R507*	NA	NA	coding	stop	NA	NA
AGACTATCAGACCTACGCAA	neStops	-	chrXIV	551951	551973	YNL041C	COG6	15	37	FALSE	5	13	VDYQTYAMA	VDY*TYAMA	Q8*	NA	NA	coding	stop	NA	NA
AGACTCTCAAGAATCCGAAA	neStops	+	chrXV	956212	956234	YOR337W	TEA1	1869	1891	FALSE	623	631	EDSQESETV	EDF*ESETV	S625F	Q626*	NA	coding	stop	c(-1.389, NA)	1.389
AGACTCTCAGCCTTACAACT	neStops	+	chrV	251871	251893	YER049W	TPA1	144	166	FALSE	48	56	EDSQPYNWG	EDF*PYNWG	S50F	Q51*	NA	coding	stop	c(-5.251, NA)	5.251
AGACTTTCAAGTATTGCGAT	neStops	-	chrIV	299094	299116	YDL088C	ASM4	888	910	FALSE	296	304	EDFQVLRLG	EDF*VLRLG	Q299*	NA	NA	coding	stop	NA	NA
AGAGAAACAAGATCTCGCCA	neStops	-	chrXI	321050	321072	YKL063C	YKL063C	447	469	FALSE	149	157	KEKQDLAKE	KEK*DLAKE	Q152*	NA	NA	coding	stop	NA	NA
AGAGAACAGTACATGAGGAC	neStops	+	chrXV	515466	515488	YOR101W	RAS1	223	245	FALSE	75	82	REQYMRTG	RE*YMRTG	Q77*	NA	NA	coding	stop	NA	NA
AGAGACAAGGCTTTAGAATA	neStops	-	chrXI	45972	45994	YKL209C	STE6	302	324	FALSE	101	108	ERQGFRIR	ER*GFRIR	Q103*	NA	NA	coding	stop	NA	NA
AGAGACAGGGTGACGTTACG	neStops	+	chrIV	175387	175409	YDL156W	CMR1	470	492	FALSE	157	164	KRQGDVTG	KR*GDVTG	Q159*	NA	NA	coding	stop	NA	NA
AGAGAGCAAAGACTGCTCAT	neStops	+	chrXIII	210950	210972	YML034W	SRC1	1426	1448	FALSE	476	483	REQRLLIG	RE*RLLIG	Q478*	NA	NA	coding	stop	NA	NA
AGAGAGCAATATGATGTTAG	neStops	+	chrI	156190	156212	YAR003W	SWD1	1186	1208	FALSE	396	403	REQYDVRG	RE*YDVRG	Q398*	NA	NA	coding	stop	NA	NA
AGAGAGCAGATGCTGGGCCA	neStops	+	chrIII	214668	214690	YCR051W	YCR051W	598	620	FALSE	200	207	REQMLGQG	RE*MLGQG	Q202*	NA	NA	coding	stop	NA	NA
AGAGAGGCAAAAAGCTAACG	neStops	+	chrII	93028	93050	YBL068W	PRS4	615	637	FALSE	205	213	KERQKANEV	KER*KANEV	Q208*	NA	NA	coding	stop	NA	NA
AGAGCAAAGAGAGCTTACCT	neStops	-	chrIV	1316306	1316328	YDR422C	SIP1	1446	1468	FALSE	482	490	KEQRELTLD	KE*RELTLD	Q484*	NA	NA	coding	stop	NA	NA
AGAGCAAAGTCATGGAAATG	neStops	-	chrX	165162	165184	YJL131C	AIM23	165	187	FALSE	55	63	KEQSHGNVA	KE*SHGNVA	Q57*	NA	NA	coding	stop	NA	NA
AGAGCAACTTCAAGATTTAT	neStops	+	chrVII	128540	128562	YGL197W	MDS3	3843	3865	FALSE	1281	1289	QEQLQDLLE	QE*FQDLLE	Q1283*	L1284F	NA	coding	stop	c(NA, -2.357)	2.357
AGAGCAAGCATTTACATGGT	neStops	-	chrIV	549220	549242	YDR046C	BAP3	1335	1357	FALSE	445	453	EEQAFTWLA	EE*AFTWLA	Q447*	NA	NA	coding	stop	NA	NA
AGAGCACCAAGAGCCTGTCA	neStops	-	chrXI	451049	451071	YKR006C	MRPL13	147	169	FALSE	49	57	EEHQEPVKD	EEY*EPVKD	H51Y	Q52*	NA	coding	stop	c(-1.267, NA)	1.267
AGAGCAGACACCTGATGAAG	neStops	-	chrVII	31172	31194	YGL251C	HFM1	291	313	FALSE	97	105	LEQTPDEEA	LE*TPDEEA	Q99*	NA	NA	coding	stop	NA	NA
AGAGCAGATGATGGCGGCAC	neStops	+	chrXIV	706447	706469	YNR045W	PET494	309	331	FALSE	103	111	EEQMMAAQV	EE*MMAAQV	Q105*	NA	NA	coding	stop	NA	NA
AGAGCAGTTCAAGCAACTGG	neStops	-	chrVI	174513	174535	YFR015C	GSY1	1857	1879	FALSE	619	627	PEQFKQLVG	PE*FKQLVG	Q621*	NA	NA	coding	stop	NA	NA
AGAGCCATCCTGCACCACGA	neStops	-	chrIV	370397	370419	YDL047W	SIT4	627	649	FALSE	209	217	SPRGAGWLF	SPRGAG*LF	W215*	NA	NA	coding	stop	NA	NA
AGAGCCCAGAAAGATGAATT	neStops	-	chrX	175013	175035	YJL129C	TRK1	2272	2294	FALSE	758	765	RAQKDELG	RV*KDELG	A759V	Q760*	NA	coding	stop	c(-1.256, NA)	1.256
AGAGCGAAGCCGGCTTCAAC	neStops	-	chrXIII	317929	317951	YMR021C	MAC1	468	490	FALSE	156	164	KERSRLQQE	KE*SRLQQE	R158*	NA	NA	coding	stop	NA	NA
AGAGCTACAGAACCAACGCT	neStops	-	chrXV	62368	62390	YOL138C	RTC1	2961	2983	FALSE	987	995	KELQNQRLE	KEL*NQRLE	Q990*	NA	NA	coding	stop	NA	NA
AGAGGAACAAGAGCAACTAA	neStops	-	chrII	130516	130538	YBL047C	EDE1	1503	1525	FALSE	501	509	PEEQEQLRE	PEE*EQLRE	Q504*	NA	NA	coding	stop	NA	NA
AGAGGAGCAGGCACAGTACG	neStops	-	chrIV	1112173	1112195	YDR322C-A	TIM11	99	121	FALSE	33	41	KEEQAQYEE	KEE*AQYEE	Q36*	NA	NA	coding	stop	NA	NA
AGAGGCTCAACAAGAAAAGG	neStops	-	chrV	403530	403552	YER122C	GLO3	801	823	FALSE	267	275	KEAQQEKED	KEV*QEKED	A269V	Q270*	NA	coding	stop	c(-3.694, NA)	3.694
AGAGGTACAAGACGAGCAAG	neStops	+	chrIII	144371	144393	YCR016W	YCR016W	738	760	FALSE	246	254	KEVQDEQEE	KEV*DEQEE	Q249*	NA	NA	coding	stop	NA	NA
AGAGTACCAAGACATCCAAG	neStops	+	chrVIII	200312	200334	YHR047C	AAP1	977	999	FALSE	326	333	ATWMSWYS	ATWMS*YS	W331*	NA	NA	coding	stop	NA	NA
AGATAACCAAGCATCCGGAT	neStops	+	chrXII	421860	421882	YLR139C	SLS1	1592	1614	FALSE	531	538	TNPDAWLS	TNPDA*LS	W536*	NA	NA	coding	stop	NA	NA
AGATACACAAAACATTGAAG	neStops	-	chrIII	20132	20154	YCL061C	MRC1	1953	1975	FALSE	651	659	LDTQNIEEV	LDI*NIEEV	T653I	Q654*	NA	coding	stop	c(-0.317, NA)	0.317
AGATATCCAATCAATGAAAA	neStops	+	chrIII	1568	1590	YCL076W	YCL076W	177	199	FALSE	59	67	GDIQSMKRD	GDI*SMKRD	Q62*	NA	NA	coding	stop	NA	NA
AGATATTCAGCTGGACTCAG	neStops	+	chrVI	229619	229641	YFR038W	IRC5	240	262	FALSE	80	88	EDIQLDSED	EDI*LDSED	Q83*	NA	NA	coding	stop	NA	NA
AGATCAAATAAGGCCGTTTC	neStops	+	chrV	419983	420005	YER129W	SAK1	2703	2725	FALSE	901	909	EDQIRPFLD	ED*IRPFLD	Q903*	NA	NA	coding	stop	NA	NA
AGATCAACAGTATGACTCAA	neStops	-	chrXIII	304471	304493	YMR016C	SOK2	1101	1123	FALSE	367	375	SDQQYDSMA	SD**YDSMA	Q369*	Q370*	NA	coding	stop	c(NA, NA)	NA
AGATCAACCATACTCAATCG	neStops	-	chrII	584941	584963	YBR177C	EHT1	1200	1222	FALSE	400	408	PDQPYSIVE	PD*SYSIVE	Q402*	P403S	NA	coding	stop	c(NA, -5.128)	5.128
AGATCAACCCTCTGTTGCCG	neStops	-	chrXIV	182539	182561	YNL248C	RPA49	48	70	FALSE	16	24	QDQPSVAVG	QD*SSVAVG	Q18*	P19S	NA	coding	stop	c(NA, -4.549)	4.549
AGATCAAGAAGTCACAGATT	neStops	+	chrXV	656018	656040	YOR172W	YRM1	1809	1831	FALSE	603	611	KDQEVTDWD	KD*EVTDWD	Q605*	NA	NA	coding	stop	NA	NA
AGATCAATTATTGCCTCTGG	neStops	-	chrXV	81975	81997	YOL126C	MDH2	924	946	FALSE	308	316	ADQLLPLVD	AD*LLPLVD	Q310*	NA	NA	coding	stop	NA	NA
AGATCAATTGAAGAGAGGTA	neStops	+	chrXV	684998	685020	YOR187W	TUF1	969	991	FALSE	323	331	RDQLKRGMV	RD*LKRGMV	Q325*	NA	NA	coding	stop	NA	NA
AGATCAGAGAGATGAACTCT	neStops	+	chrVII	261156	261178	YGL133W	ITC1	3450	3472	FALSE	1150	1158	EDQRDELLE	ED*RDELLE	Q1152*	NA	NA	coding	stop	NA	NA
AGATCAGCAACAGTATCAAA	neStops	-	chrIV	1126455	1126477	YDR329C	PEX3	1119	1141	FALSE	373	381	EDQQQYQMA	ED**QYQMA	Q375*	Q376*	NA	coding	stop	c(NA, NA)	NA
AGATCAGGTTTCCAACAATA	neStops	-	chrIV	1470559	1470581	YDR512C	EMI1	483	505	FALSE	161	169	KDQVSNNKA	KD*VSNNKA	Q163*	NA	NA	coding	stop	NA	NA
AGATCCAACTGGCAGCACGT	neStops	+	chrXI	43250	43272	YKL209C	STE6	3024	3046	FALSE	1008	1016	GQRAASWIY	GQRAAS*IY	W1014*	NA	NA	coding	stop	NA	NA
AGATCCAAGCGTTTGTATGG	neStops	-	chrXVI	888505	888527	YPR174C	YPR174C	182	204	FALSE	61	68	KIQAFVWG	KI*AFVWG	Q63*	NA	NA	coding	stop	NA	NA
AGATCCCAAGTTCTCTGTTC	neStops	-	chrXIV	274776	274798	YNL193W	YNL193W	409	431	FALSE	137	144	PEQRTWDL	PEQRT*NL	W142*	D143N	NA	coding	stop	c(NA, -5)	5
AGATCCGCAGCTGACTACAC	neStops	-	chrIV	493824	493846	YDR026C	NSI1	423	445	FALSE	141	149	LDPQLTTLD	LDL*LTTLD	P143L	Q144*	NA	coding	stop	c(-7.604, NA)	7.604
AGATGAACAAAATTTAAGAT	neStops	+	chrX	535271	535293	YJR053W	BFA1	1245	1267	FALSE	415	423	LDEQNLRWV	LDE*NLRWV	Q418*	NA	NA	coding	stop	NA	NA
AGATGATCAAATAATTGGGA	neStops	+	chrIII	99331	99353	YCL014W	BUD3	3051	3073	FALSE	1017	1025	TDDQIIGKA	TDD*IIGKA	Q1020*	NA	NA	coding	stop	NA	NA
AGATGCCAAGCTGTTCTTAG	neStops	-	chrVIII	500464	500486	YHR201C	PPX1	658	680	FALSE	220	227	RCQAVLSG	RC*AVLSG	Q222*	NA	NA	coding	stop	NA	NA
AGATGCGATCTCGTCTTCGT	neStops	-	chrX	502324	502346	YJR036C	HUL4	1046	1068	FALSE	349	356	EMRSRLRR	EM*SRLRR	R351*	NA	NA	coding	stop	NA	NA
AGATGTGCCAGATGACATAA	neStops	+	chrV	83487	83509	YEL036C	ANP1	1044	1066	FALSE	348	356	PHYVIWHIY	PHYVI*HIY	W353*	NA	NA	coding	stop	NA	NA
AGATTATCAAGGAACTGCTG	neStops	+	chrVII	560693	560715	YGR038W	ORM1	12	34	FALSE	4	12	LDYQGTAEA	LDY*GTAEA	Q7*	NA	NA	coding	stop	NA	NA
AGATTCAAACCAAGATACTG	neStops	+	chrXII	705898	705920	YLR283W	YLR283W	713	735	FALSE	238	245	KIQTKILG	KI*TKILG	Q240*	NA	NA	coding	stop	NA	NA
AGATTCAACAGATGTGTGGT	neStops	+	chrXIII	695966	695988	YMR214W	SCJ1	617	639	FALSE	206	213	QIQQMCGR	QI*QMCGR	Q208*	NA	NA	coding	stop	NA	NA
AGATTGGCAAAATAGACTGT	neStops	+	chrIX	417077	417099	YIR033W	MGA2	954	976	FALSE	318	326	TDWQNRLLG	TDW*NRLLG	Q321*	NA	NA	coding	stop	NA	NA
AGATTTACAGGACCGTGCTC	neStops	-	chrII	738030	738052	YBR264C	YPT10	318	340	FALSE	106	114	QDLQDRAQG	QDL*DRAQG	Q109*	NA	NA	coding	stop	NA	NA
AGATTTCCACTGCATTACCC	neStops	-	chrX	86522	86544	YJL181W	RBH1	863	885	FALSE	288	295	SWVMQWKS	SWVMQ*KS	W293*	NA	NA	coding	stop	NA	NA
AGATTTCCAGCCAAATTGTG	neStops	-	chrVIII	300923	300945	YHR098C	SFB3	990	1012	FALSE	330	338	SDFQPNCEV	SDF*PNCEV	Q333*	NA	NA	coding	stop	NA	NA
AGATTTCCATATTCCAGCGG	neStops	+	chrIV	39728	39750	YDL231C	BRE4	2495	2517	FALSE	832	839	TTAGIWKS	TTAGI*KS	W837*	NA	NA	coding	stop	NA	NA
AGATTTGCAAGCCGCAAGAA	neStops	+	chrXVI	823513	823535	YPR145W	ASN1	894	916	FALSE	298	306	PDLQAARKV	PDL*AARKV	Q301*	NA	NA	coding	stop	NA	NA
AGATTTGCAGAAAAAAGGGA	neStops	+	chrXI	622753	622775	YKR095W	MLP1	2949	2971	FALSE	983	991	LDLQKKGME	LDL*KKGME	Q986*	NA	NA	coding	stop	NA	NA
AGCAACAGCAAGTTAAGAAG	neStops	-	chrIV	1464647	1464669	YDR507C	GIN4	1118	1140	FALSE	373	380	KQQQVKKR	KQ*QVKKR	Q375*	NA	NA	coding	stop	NA	NA
AGCAACCAAAATAAAGCTTC	neStops	+	chrXIV	630658	630680	YNR001C	CIT1	382	404	FALSE	128	135	PEALFWLL	PEALF*LL	W133*	NA	NA	coding	stop	NA	NA
AGCAACCAAGATGTTGAAAT	neStops	-	chrXVI	516177	516199	YPL019C	VTC3	820	842	FALSE	274	281	SNQDVEIG	SN*DVEIG	Q276*	NA	NA	coding	stop	NA	NA
AGCAATCCAACCAAGAACAT	neStops	+	chrVI	46998	47020	YFL042C	LAM5	725	747	FALSE	242	249	SNVLGWIA	SNVLG*IA	W247*	NA	NA	coding	stop	NA	NA
AGCACAACAGCAGCAAGAAG	neStops	-	chrXVI	500944	500966	YPL026C	SKS1	1218	1240	FALSE	406	414	QAQQQQEEE	QA**QQEEE	Q408*	Q409*	NA	coding	stop	c(NA, NA)	NA
AGCACAAGGTCCCCCGGGCT	neStops	+	chrXII	559238	559260	YLR207W	HRD3	2451	2473	FALSE	817	825	QAQGPPGWD	QA*GPPGWD	Q819*	NA	NA	coding	stop	NA	NA
AGCACAATTATTAACATTAA	neStops	+	chrXI	410838	410860	YKL015W	PUT3	2295	2317	FALSE	765	773	RAQLLTLMA	RA*LLTLMA	Q767*	NA	NA	coding	stop	NA	NA
AGCACACCATAAAAACATGA	neStops	+	chrXII	36167	36189	YLL052C	AQY2	173	195	FALSE	58	65	TFMFLWCA	TFMFL*YA	W63*	C64Y	NA	coding	stop	c(NA, -4.714)	4.714
AGCACAGAGAAGGCTTTCGA	neStops	-	chrVII	809225	809247	YGR161C	RTS3	174	196	FALSE	58	66	SAQRRLSRE	SA*RRLSRE	Q60*	NA	NA	coding	stop	NA	NA
AGCAGAACAGGGTGTTATGA	neStops	-	chrXV	895658	895680	YOR308C	SNU66	708	730	FALSE	236	244	GAEQGVMKA	GAE*GVMKA	Q239*	NA	NA	coding	stop	NA	NA
AGCAGCAACAGCAGCATGCC	neStops	-	chrI	113279	113301	YAL021C	CCR4	59	81	FALSE	20	27	QQQQQHAG	QQ*QQHAG	Q22*	NA	NA	coding	stop	NA	NA
AGCAGCAGAATTACCTTCAG	neStops	-	chrV	394643	394665	YER115C	SPR6	203	225	FALSE	68	75	KQQNYLQG	KQ*NYLQG	Q70*	NA	NA	coding	stop	NA	NA
AGCAGCCAGTTGATGAAGAA	neStops	-	chrXII	417345	417367	YLR137W	RKM5	340	362	FALSE	114	121	PFFINWLL	PFFIN*LL	W119*	NA	NA	coding	stop	NA	NA
AGCAGTTCAATTTAATTGGC	neStops	+	chrV	140547	140569	YEL008W	YEL008W	36	58	FALSE	12	20	KAVQFNWLE	KAV*FNWLE	Q15*	NA	NA	coding	stop	NA	NA
AGCATCCCAAATGGCTGCTA	neStops	-	chrXVI	350280	350302	YPL106C	SSE1	1974	1996	FALSE	658	666	EASQMAAMA	EAF*MAAMA	S660F	Q661*	NA	coding	stop	c(-2.529, NA)	2.529
AGCATCTCAAATTAAGCACG	neStops	+	chrIV	175007	175029	YDL156W	CMR1	90	112	FALSE	30	38	VASQIKHEA	VAF*IKHEA	S32F	Q33*	NA	coding	stop	c(-3.436, NA)	3.436
AGCATGCAGCCGGGTCGTCG	neStops	+	chrX	549356	549378	YJR060W	CBF1	598	620	FALSE	200	207	SMQPGRRG	SM*PGRRG	Q202*	NA	NA	coding	stop	NA	NA
AGCATTCAAGGTCACGTGCC	neStops	+	chrVII	906006	906028	YGR204W	ADE3	73	95	FALSE	25	32	SIQGHVPG	SI*GHVPG	Q27*	NA	NA	coding	stop	NA	NA
AGCCAAAACTACAGCGAAAA	neStops	+	chrIV	1357088	1357110	YDR448W	ADA2	1024	1046	FALSE	342	349	SQNYSENG	S*NYSENG	Q343*	NA	NA	coding	stop	NA	NA
AGCCAAAAGAATCTTTATGA	neStops	-	chrV	389904	389926	YER113C	TMN3	127	149	FALSE	43	50	SQKNLYDG	S*KNLYDG	Q44*	NA	NA	coding	stop	NA	NA
AGCCAAACAACCAATGTGCT	neStops	+	chrIX	227493	227515	YIL072W	HOP1	892	914	FALSE	298	305	SQTTNVLG	S*ITNVLG	Q299*	T300I	NA	coding	stop	c(NA, -4.727)	4.727
AGCCAAAGGATTACAGGGCC	neStops	-	chrXIV	338488	338510	YNL159C	ASI2	838	860	FALSE	280	287	SQRITGPG	S*RITGPG	Q281*	NA	NA	coding	stop	NA	NA
AGCCAAATCCTGAGAGAAGT	neStops	-	chrXV	373357	373379	YOR021C	SFM1	61	83	FALSE	21	28	SQILREVG	S*ILREVG	Q22*	NA	NA	coding	stop	NA	NA
AGCCAAATCGACCGCATCTG	neStops	+	chrIV	1080129	1080151	YDR309C	GIC2	49	71	FALSE	17	24	PQMRSIWL	PQMRSI*L	W23*	NA	NA	coding	stop	NA	NA
AGCCAAATTTCGTTATTTAG	neStops	-	chrVIII	299452	299474	YHR098C	SFB3	2461	2483	FALSE	821	828	SQISLFSG	S*ISLFSG	Q822*	NA	NA	coding	stop	NA	NA
AGCCAACACAAACCCTTATT	neStops	+	chrVIII	337465	337487	YHR113W	APE4	1129	1151	FALSE	377	384	SQHKPLLG	S*YKPLLG	Q378*	H379Y	NA	coding	stop	c(NA, -5.192)	5.192
AGCCAACTCACTGCAGTTGA	neStops	+	chrXVI	583102	583124	YPR011C	YPR011C	919	941	FALSE	307	314	PSTAVSWL	PSTAVN*L	S312N	W313*	NA	coding	stop	c(-2.026, NA)	2.026
AGCCAAGAAGGCGTTAAGGG	neStops	-	chrX	189313	189335	YJL123C	MTC1	106	128	FALSE	36	43	SQEGVKGG	S*EGVKGG	Q37*	NA	NA	coding	stop	NA	NA
AGCCAAGAGCCGACTTCTTA	neStops	+	chrIX	404631	404653	YIR025W	MND2	973	995	FALSE	325	332	SQEPTSYG	S*EPTSYG	Q326*	NA	NA	coding	stop	NA	NA
AGCCAAGGACCGGTAGCCCA	neStops	-	chrIV	452435	452457	YDR001C	NTH1	19	41	FALSE	7	14	SQGPVAQG	S*GPVAQG	Q8*	NA	NA	coding	stop	NA	NA
AGCCAAGGTGACGAATCTTG	neStops	-	chrXVI	915811	915833	YPR189W	SKI3	3148	3170	FALSE	1050	1057	PQDSSPWL	PQDSSP*L	W1056*	NA	NA	coding	stop	NA	NA
AGCCAAGTTGCAGTGATTGG	neStops	-	chrXIV	30984	31006	YNL325C	FIG4	373	395	FALSE	125	132	SQVAVIGG	S*VAVIGG	Q126*	NA	NA	coding	stop	NA	NA
AGCCAATATAATCTGTATAC	neStops	+	chrII	100137	100159	YBL065W	YBL065W	175	197	FALSE	59	66	SQYNLYTG	S*YNLYTG	Q60*	NA	NA	coding	stop	NA	NA
AGCCAATCACCCTTAGCGTT	neStops	+	chrVII	63103	63125	YGL231C	EMC4	496	518	FALSE	166	173	PNAKGDWL	PNAKGN*L	D171N	W172*	NA	coding	stop	c(-5, NA)	5
AGCCAATCCTTGACCGAGTA	neStops	+	chrXIII	679399	679421	YMR207C	HFA1	4144	4166	FALSE	1382	1389	PYSVKDWL	PYSVKN*L	D1387N	W1388*	NA	coding	stop	c(-0.288, NA)	0.288
AGCCAATCTTCCCCAATAGG	neStops	+	chrXVI	505960	505982	YPL023C	MET12	331	353	FALSE	111	118	PPIGEDWL	PPIGEN*L	D116N	W117*	NA	coding	stop	c(-1.754, NA)	1.754
AGCCAATTGGAACAGGCAAA	neStops	-	chrXIII	79620	79642	YML097C	VPS9	49	71	FALSE	17	24	SQLEQANG	S*LEQANG	Q18*	NA	NA	coding	stop	NA	NA
AGCCACAACACACGAAACCA	neStops	+	chrII	118214	118236	YBL054W	TOD6	626	648	FALSE	209	216	EPQHTKPR	EL*HTKPR	P210L	Q211*	NA	coding	stop	c(-1.705, NA)	1.705
AGCCACCAACGTTCAAGAGA	neStops	-	chrVI	168113	168135	YFR012W	DCV1	226	248	FALSE	76	83	PSLERWWL	PSLER**L	W81*	W82*	NA	coding	stop	c(NA, NA)	NA
AGCCACCAATTAGGAGTACC	neStops	+	chrIV	774355	774377	YDR159W	SAC3	2479	2501	FALSE	827	834	SHQLGVPG	SY*LGVPG	H828Y	Q829*	NA	coding	stop	c(-1.494, NA)	1.494
AGCCAGAATGCTTACTCTTT	neStops	+	chrXII	413371	413393	YLR135W	SLX4	91	113	FALSE	31	38	SQNAYSLG	S*NAYSLG	Q32*	NA	NA	coding	stop	NA	NA
AGCCAGCGTGCACGTAGTAC	neStops	+	chrIV	1429321	1429343	YDR488C	PAC11	1447	1469	FALSE	483	490	PVLRARWL	PVLRAH*L	R488H	W489*	NA	coding	stop	c(-0.406, NA)	0.406
AGCCAGGCAGTTGGAACTGG	neStops	-	chrVII	958165	958187	YGR233C	PHO81	24	46	FALSE	8	16	EARQLELAE	EAR*LELAE	Q11*	NA	NA	coding	stop	NA	NA
AGCCAGTACTTGCCGGCATC	neStops	+	chrII	735127	735149	YBR261C	TAE1	382	404	FALSE	128	135	PDAGKYWL	PDAGKY*L	W134*	NA	NA	coding	stop	NA	NA
AGCCAGTCTAACACCACAAC	neStops	-	chrIV	419896	419918	YDL019C	OSH2	1597	1619	FALSE	533	540	SQSNTTTG	S*FNTTTG	Q534*	S535F	NA	coding	stop	c(NA, -0.934)	0.934
AGCCATCTTTGTGTCATAAT	neStops	+	chrII	113015	113037	YBL057C	PTH2	391	413	FALSE	131	138	PIMTQRWL	PIMTQK*L	R136K	W137*	NA	coding	stop	c(-2.9, NA)	2.9
AGCCATTGGACGGTTAAAGA	neStops	-	chrV	47273	47295	YEL056W	HAT2	106	128	FALSE	36	43	PSLTVQWL	PSLTVQ*L	W42*	NA	NA	coding	stop	NA	NA
AGCCATTGGCAACCCCAAAT	neStops	-	chrI	155350	155372	YAR003W	SWD1	346	368	FALSE	116	123	PIWGCQWL	PIWGCQ*L	W122*	NA	NA	coding	stop	NA	NA
AGCCCAAAAGAATACAATAT	neStops	-	chrX	424019	424041	YJL006C	CTK2	69	91	FALSE	23	31	RAQKNTISD	RA*KNTISD	Q25*	NA	NA	coding	stop	NA	NA
AGCCCAAGGCGCCAAATTAG	neStops	+	chrXVI	353886	353908	YPL105C	SYH1	1505	1527	FALSE	502	509	TTNLAPWA	TTNLAP*A	W508*	NA	NA	coding	stop	NA	NA
AGCCCACACATCTGATAGTT	neStops	+	chrII	465417	465439	YBR112C	CYC8	332	354	FALSE	111	118	PELSDVWA	PELSDV*A	W117*	NA	NA	coding	stop	NA	NA
AGCCCATGGTGCGTGTTCTC	neStops	+	chrVII	476742	476764	YGL009C	LEU1	1889	1911	FALSE	630	637	SREHAPWA	SREHAP*A	W636*	NA	NA	coding	stop	NA	NA
AGCCCCAGGTAATGGCCCAT	neStops	-	chrIV	112287	112309	YDL194W	SNF3	708	730	FALSE	236	244	YQWAITWGL	YQWAIT*SL	W242*	G243S	NA	coding	stop	c(NA, -5.933)	5.933
AGCCCCCAAAACGGTCTTGA	neStops	-	chrX	622392	622414	YJR103W	URA8	1639	1661	FALSE	547	554	PSRPFWGL	PSRPF*KL	W552*	G553K	NA	coding	stop	c(NA, -7.93)	7.93
AGCCCCCAGTTTCTAATTAT	neStops	-	chrVI	167975	167997	YFR012W	DCV1	88	110	FALSE	30	37	PIIRNWGL	PIIRN*KL	W35*	G36K	NA	coding	stop	c(NA, -5.2)	5.2
AGCCGAACAGGAAGAGGAGA	neStops	+	chrXV	101876	101898	YOL115W	PAP2	402	424	FALSE	134	142	QAEQEEERE	QAE*EEERE	Q137*	NA	NA	coding	stop	NA	NA
AGCCGTTCAAGCATTAGGTC	neStops	-	chrVII	613547	613569	YGR061C	ADE6	2397	2419	FALSE	799	807	EAVQALGLD	EAV*ALGLD	Q802*	NA	NA	coding	stop	NA	NA
AGCGCAATTGACCCGCAAAC	neStops	+	chrXI	15672	15694	YKL219W	COS9	1188	1210	FALSE	396	404	EAQLTRKQA	EA*LTRKQA	Q398*	NA	NA	coding	stop	NA	NA
AGCGCAGAATATGGGGGAGT	neStops	+	chrVII	927896	927918	YGR217W	CCH1	3201	3223	FALSE	1067	1075	IAQNMGELA	IA*NMGELA	Q1069*	NA	NA	coding	stop	NA	NA
AGCGCAGAATGAGGAAGGAA	neStops	-	chrVII	113050	113072	YGL203C	KEX1	1593	1615	FALSE	531	539	EAQNEEGKE	EA*NEEGKE	Q533*	NA	NA	coding	stop	NA	NA
AGCGCAGATTCAACAATATT	neStops	-	chrIII	130852	130874	YCR009C	RVS161	669	691	FALSE	223	231	LAQIQQYLD	LA*IQQYLD	Q225*	NA	NA	coding	stop	NA	NA
AGCGCAGCAGATACTTGCAT	neStops	-	chrXV	1022054	1022076	YOR363C	PIP2	1137	1159	FALSE	379	387	LAQQILASE	LA**ILASE	Q381*	Q382*	NA	coding	stop	c(NA, NA)	NA
AGCGGACCAGTACAAAGTTA	neStops	-	chrIV	763444	763466	YDR150W	NUM1	7817	7839	FALSE	2606	2613	TLTLYWSA	TLTLY*SA	W2611*	NA	NA	coding	stop	NA	NA
AGCGGCCGAGTTTCAGAACT	neStops	-	chrXII	239915	239937	YLR047C	FRE8	1471	1493	FALSE	491	498	SGRVSELG	SG*VSELG	R493*	NA	NA	coding	stop	NA	NA
AGCTAAACAATTGAAGGGGG	neStops	-	chrXV	295514	295536	YOL016C	CMK2	585	607	FALSE	195	203	IAKQLKGEE	IAK*LKGEE	Q198*	NA	NA	coding	stop	NA	NA
AGCTAACCCATCTCACATCC	neStops	-	chrXI	48697	48719	YKL207W	EMC3	504	526	FALSE	168	176	DLDVRWVSS	DLDVR*ISS	W173*	V174I	NA	coding	stop	c(NA, -1)	1
AGCTATGCAGGACGCCAAAG	neStops	-	chrII	804238	804260	YBR298C	MAL31	216	238	FALSE	72	80	EAMQDAKEA	EAM*DAKEA	Q75*	NA	NA	coding	stop	NA	NA
AGCTCAAAAGGAGAAGAACA	neStops	+	chrI	76780	76802	YAL035W	FUN12	354	376	FALSE	118	126	QAQKEKNKE	QA*KEKNKE	Q120*	NA	NA	coding	stop	NA	NA
AGCTCAAATTATTGAGGCAT	neStops	+	chrXIII	458671	458693	YMR096W	SNZ1	264	286	FALSE	88	96	EAQIIEALE	EA*IIEALE	Q90*	NA	NA	coding	stop	NA	NA
AGCTCAACTATTAAGACAGT	neStops	-	chrVIII	162209	162231	YHR027C	RPN1	2481	2503	FALSE	827	835	LAQLLRQLA	LA*LLRQLA	Q829*	NA	NA	coding	stop	NA	NA
AGCTCAGAAAAGACTTAAAA	neStops	+	chrXIV	474512	474534	YNL082W	PMS1	1122	1144	FALSE	374	382	QAQKRLKTE	QA*KRLKTE	Q376*	NA	NA	coding	stop	NA	NA
AGCTCAGAAATGCTACTGTG	neStops	-	chrX	103675	103697	YJL168C	SET2	732	754	FALSE	244	252	QAQKCYCEE	QA*KCYCEE	Q246*	NA	NA	coding	stop	NA	NA
AGCTCCAGGAGGAACTTACG	neStops	+	chrXVI	506734	506756	YPL022W	RAD1	38	60	FALSE	13	20	ELQEELTR	EL*EELTR	Q15*	NA	NA	coding	stop	NA	NA
AGCTCCCAAAGCTTTAAGTC	neStops	-	chrXII	501468	501490	YLR172C	DPH5	673	695	FALSE	225	232	SSQSFKSG	SF*SFKSG	S226F	Q227*	NA	coding	stop	c(-3.223, NA)	3.223
AGCTCCCAGAATCATCATGA	neStops	+	chrII	724813	724835	YBR255W	MTC4	358	380	FALSE	120	127	SSQNHHEG	SF*NHHEG	S121F	Q122*	NA	coding	stop	c(-2.667, NA)	2.667
AGCTCGAGCCATCAGAGAGG	neStops	-	chrX	72757	72779	YJL192C	SOP4	636	658	FALSE	212	220	TARAIREEA	TA*AIREEA	R214*	NA	NA	coding	stop	NA	NA
AGCTCTACAGGGAACAATTG	neStops	+	chrXVI	330076	330098	YPL116W	HOS3	471	493	FALSE	157	165	KALQGTIGA	KAL*GTIGA	Q160*	NA	NA	coding	stop	NA	NA
AGCTCTCAAGCTCAAAACAC	neStops	-	chrII	213062	213084	YBL007C	SLA1	3283	3305	FALSE	1095	1102	SSQAQNTG	SF*AQNTG	S1096F	Q1097*	NA	coding	stop	c(-1.059, NA)	1.059
AGCTCTGCAAATGAAGGCAA	neStops	+	chrVI	37795	37817	YFL049W	SWP82	993	1015	FALSE	331	339	QALQMKAMD	QAL*MKAMD	Q334*	NA	NA	coding	stop	NA	NA
AGCTGAACAGGATGACAAGC	neStops	-	chrVII	966203	966225	YGR238C	KEL2	2463	2485	FALSE	821	829	QAEQDDKQE	QAE*DDKQE	Q824*	NA	NA	coding	stop	NA	NA
AGCTGCCCAAGATATCTACA	neStops	-	chrIX	186618	186640	YIL094C	LYS12	993	1015	FALSE	331	339	EAAQDIYKA	EAV*DIYKA	A333V	Q334*	NA	coding	stop	c(-3.985, NA)	3.985
AGCTTACAATGTAAAAGGTG	neStops	+	chrIX	50410	50432	YIL156W	UBP7	2320	2342	FALSE	774	781	SLQCKRCG	SL*CKRCG	Q776*	NA	NA	coding	stop	NA	NA
AGCTTACCAATGTCACATAA	neStops	+	chrXII	723028	723050	YLR296W	YLR296W	51	73	FALSE	17	25	SAYQCHIKE	SAY*CHIKE	Q20*	NA	NA	coding	stop	NA	NA
AGCTTCCACCATGACGAAGT	neStops	+	chrXV	583140	583162	YOR137C	SIA1	520	542	FALSE	174	181	PTSSWWKL	PTSSW*KL	W179*	NA	NA	coding	stop	NA	NA
AGCTTGCAGCTATCTCAAGA	neStops	+	chrVII	70676	70698	YGL227W	VID30	1006	1028	FALSE	336	343	SLQLSQDG	SL*LSQDG	Q338*	NA	NA	coding	stop	NA	NA
AGGAAACAGACCGATCACAT	neStops	+	chrXIV	654470	654492	YNR015W	SMM1	1084	1106	FALSE	362	369	RKQTDHIG	RK*TDHIG	Q364*	NA	NA	coding	stop	NA	NA
AGGAACAAGCACGCAGGTTC	neStops	+	chrXV	574295	574317	YOR132W	VPS17	1121	1143	FALSE	374	381	QEQARRFR	QE*ARRFR	Q376*	NA	NA	coding	stop	NA	NA
AGGAACAAGCATTTAAGAAC	neStops	+	chrVIII	174503	174525	YHR032W	ERC1	1160	1182	FALSE	387	394	KEQAFKNW	KE*AFKNW	Q389*	NA	NA	coding	stop	NA	NA
AGGAACAGTGGATGGAAAGC	neStops	+	chrXV	760398	760420	YOR223W	DSC3	617	639	FALSE	206	213	EEQWMESG	EE*WMESG	Q208*	NA	NA	coding	stop	NA	NA
AGGAACAGTTATTCGCAAAA	neStops	+	chrVIII	403672	403694	YHR154W	RTT107	707	729	FALSE	236	243	EEQLFAKW	EE*LFAKW	Q238*	NA	NA	coding	stop	NA	NA
AGGAACTCAGCTGGCTTTAT	neStops	+	chrXII	525230	525252	YLR187W	SKG3	366	388	FALSE	122	130	LGTQLALWD	LGI*LALWD	T124I	Q125*	NA	coding	stop	c(-5.795, NA)	5.795
AGGACAACCGCCGTTTAGAG	neStops	+	chrIV	1395795	1395817	YDR466W	PKH3	675	697	FALSE	225	233	QGQPPFRGE	QG*SPFRGE	Q227*	P228S	NA	coding	stop	c(NA, -7.667)	7.667
AGGACAAGAGGCGGCAGTTA	neStops	-	chrIV	1465642	1465664	YDR507C	GIN4	123	145	FALSE	41	49	TGQEAAVKV	TG*EAAVKV	Q43*	NA	NA	coding	stop	NA	NA
AGGACAGAGGTTAACTGAAG	neStops	-	chrVII	797061	797083	YGR154C	GTO1	786	808	FALSE	262	270	LGQRLTEAD	LG*RLTEAD	Q264*	NA	NA	coding	stop	NA	NA
AGGACAGTTTATCGATGCGT	neStops	+	chrII	290209	290231	YBR024W	SCO2	765	787	FALSE	255	263	EGQFIDALG	EG*FIDALG	Q257*	NA	NA	coding	stop	NA	NA
AGGACAGTTTGTTGATGCTT	neStops	-	chrII	310684	310706	YBR037C	SCO1	747	769	FALSE	249	257	EGQFVDALG	EG*FVDALG	Q251*	NA	NA	coding	stop	NA	NA
AGGACCATTTGAGAATCATC	neStops	+	chrXIII	468603	468625	YMR101C	SRT1	852	874	FALSE	284	292	YLMILKWSF	YLMILK*SF	W290*	NA	NA	coding	stop	NA	NA
AGGACCCGATTGGTTCCTCA	neStops	-	chrXI	536080	536102	YKR054C	DYN1	11824	11846	FALSE	3942	3949	RTRLVPHG	RI*LVPHG	T3943I	R3944*	NA	coding	stop	c(-1.731, NA)	1.731
AGGAGCAATTGTACTCTTTA	neStops	-	chrIX	222988	223010	YIL073C	SPO22	2855	2877	FALSE	952	959	QEQLYSLW	QE*LYSLW	Q954*	NA	NA	coding	stop	NA	NA
AGGAGCAGTCGGGAATGGCT	neStops	+	chrVII	503908	503930	YGR004W	PEX31	971	993	FALSE	324	331	EEQSGMAW	EE*SGMAW	Q326*	NA	NA	coding	stop	NA	NA
AGGAGGCCAAAACGTTAATA	neStops	-	chrXV	103667	103689	YOL114C	PTH4	237	259	FALSE	79	87	PGGQNVNKV	PGG*NVNKV	Q82*	NA	NA	coding	stop	NA	NA
AGGATACAGCGTGATAAGAA	neStops	+	chrV	157154	157176	YER002W	NOP16	352	374	FALSE	118	125	RIQRDKNG	RI*RDKNG	Q120*	NA	NA	coding	stop	NA	NA
AGGATCAAACAGTCTCAGAC	neStops	+	chrVII	285757	285779	YGL119W	COQ8	1316	1338	FALSE	439	446	KDQTVSDR	KD*TVSDR	Q441*	NA	NA	coding	stop	NA	NA
AGGATCCAAAATTATACCAG	neStops	+	chrXVI	599879	599901	YPR020W	ATP20	10	32	FALSE	4	11	RIQNYTSG	RI*NYTSG	Q6*	NA	NA	coding	stop	NA	NA
AGGATCCCAGCAGTGGAGTA	neStops	+	chrIII	106446	106468	YCL008C	STP22	386	408	FALSE	129	136	PILHCWDP	PILHC*NP	W134*	D135N	NA	coding	stop	c(NA, 0.968)	0.968
AGGCAAAACAACCGGGCATA	neStops	-	chrVII	753630	753652	YGR130C	YGR130C	193	215	FALSE	65	72	RQNNRAYG	R*NNRAYG	Q66*	NA	NA	coding	stop	NA	NA
AGGCAAACAATATATTATGC	neStops	-	chrVIII	76147	76169	YHL014C	YLF2	1146	1168	FALSE	382	390	AGKQYIMQD	AGK*YIMQD	Q385*	NA	NA	coding	stop	NA	NA
AGGCAACCTGTTGGTGTATG	neStops	+	chrII	247460	247482	YBR006W	UGA2	451	473	FALSE	151	158	RQPVGVCG	R*FVGVCG	Q152*	P153F	NA	coding	stop	c(NA, -10.98)	10.98
AGGCAAGCAACAAAAGATGC	neStops	+	chrV	365045	365067	YER103W	SSA4	457	479	FALSE	153	160	RQATKDAG	R*VTKDAG	Q154*	A155V	NA	coding	stop	c(NA, -3.454)	3.454
AGGCAAGGGGTAACAGGAAT	neStops	+	chrXV	517843	517865	YOR104W	PIN2	202	224	FALSE	68	75	RQGVTGIG	R*GVTGIG	Q69*	NA	NA	coding	stop	NA	NA
AGGCAATATATTCAAGAAGA	neStops	-	chrXIII	604955	604977	YMR171C	EAR1	544	566	FALSE	182	189	RQYIQEEG	R*YIQEEG	Q183*	NA	NA	coding	stop	NA	NA
AGGCAATCCAGCAAAATCAA	neStops	-	chrXI	606057	606079	YKR089C	TGL4	2287	2309	FALSE	763	770	RQSSKING	R*FSKING	Q764*	S765F	NA	coding	stop	c(NA, -2.165)	2.165
AGGCAATTCGTTAAAGAGCA	neStops	-	chrIII	122183	122205	YCR005C	CIT2	124	146	FALSE	42	49	RQFVKEHG	R*FVKEHG	Q43*	NA	NA	coding	stop	NA	NA
AGGCAATTGAATGAGGGGCT	neStops	-	chrXIII	681220	681242	YMR207C	HFA1	2323	2345	FALSE	775	782	RQLNEGLG	R*LNEGLG	Q776*	NA	NA	coding	stop	NA	NA
AGGCAATTGAATGATGCGGA	neStops	+	chrXIV	188678	188700	YNL243W	SLA2	628	650	FALSE	210	217	RQLNDAEG	R*LNDAEG	Q211*	NA	NA	coding	stop	NA	NA
AGGCACAGAAATTGCTGTTC	neStops	+	chrV	80829	80851	YEL038W	UTR4	368	390	FALSE	123	130	KAQKLLFG	KV*KLLFG	A124V	Q125*	NA	coding	stop	c(-4, NA)	4
AGGCACCCGAGTATACGGCT	neStops	-	chrI	114159	114181	YAL020C	ATS1	435	457	FALSE	145	153	QGTRVYGWG	QGI*VYGWG	T147I	R148*	NA	coding	stop	c(-2.604, NA)	2.604
AGGCACGAGCCAAGTCGATG	neStops	-	chrXIII	471669	471691	YMR102C	YMR102C	662	684	FALSE	221	228	EARAKSMR	EV*AKSMR	A222V	R223*	NA	coding	stop	c(-0.608, NA)	0.608
AGGCAGCACCAGTTAGAAGC	neStops	+	chrV	155077	155099	YER001W	MNN1	1558	1580	FALSE	520	527	RQHQLEAG	R*YQLEAG	Q521*	H522Y	NA	coding	stop	c(NA, -5.4)	5.4
AGGCAGCAGTACGATCAATT	neStops	-	chrVI	105863	105885	YFL016C	MDJ1	352	374	FALSE	118	125	RQQYDQFG	R**YDQFG	Q119*	Q120*	NA	coding	stop	c(NA, NA)	NA
AGGCCAAAAATCATACAATA	neStops	-	chrVII	156812	156834	YGL183C	MND1	369	391	FALSE	123	131	VGQKSYNRE	VG*KSYNRE	Q125*	NA	NA	coding	stop	NA	NA
AGGCCAGAAAAGAGGGCTCG	neStops	+	chrVIII	99977	99999	YHL004W	MRP4	759	781	FALSE	253	261	QGQKRGLEE	QG*KRGLEE	Q255*	NA	NA	coding	stop	NA	NA
AGGCCTACAGATGCAACAGC	neStops	+	chrVII	917480	917502	YGR212W	SLI1	441	463	FALSE	147	155	EGLQMQQPV	EGL*MQQPV	Q150*	NA	NA	coding	stop	NA	NA
AGGCGACCAAACCACATACT	neStops	-	chrVI	30378	30400	YFL051C	YFL051C	141	163	FALSE	47	55	IGDQTTYLE	IGD*TTYLE	Q50*	NA	NA	coding	stop	NA	NA
AGGCGATCAGTTTGCACCGG	neStops	-	chrXV	626732	626754	YOR155C	ISN1	1227	1249	FALSE	409	417	VGDQFAPVG	VGD*FAPVG	Q412*	NA	NA	coding	stop	NA	NA
AGGCGCAATATGAAACTGAA	neStops	+	chrXVI	715760	715782	YPR089W	YPR089W	2486	2508	FALSE	829	836	KAQYETEG	KV*YETEG	A830V	Q831*	NA	coding	stop	c(-0.552, NA)	0.552
AGGCTTCAACGAAGTGGAAA	neStops	-	chrII	259295	259317	YBR012C	YBR012C	250	272	FALSE	84	91	RLQRSGNG	RF*RSGNG	L85F	Q86*	NA	coding	stop	c(-3, NA)	3
AGGGACCAAGCCTTCATTCT	neStops	+	chrXV	627127	627149	YOR155C	ISN1	832	854	FALSE	278	285	PRMKAWSL	PRMKA*SL	W283*	NA	NA	coding	stop	NA	NA
AGGGCAAATGTCTGTTGAAA	neStops	-	chrIV	675136	675158	YDR109C	YDR109C	510	532	FALSE	170	178	GGQMSVEME	GG*MSVEME	Q172*	NA	NA	coding	stop	NA	NA
AGGGCAGATAGATGGTAGGA	neStops	-	chrVII	451666	451688	YGL023C	PIB2	417	439	FALSE	139	147	EGQIDGRKA	EG*IDGRKA	Q141*	NA	NA	coding	stop	NA	NA
AGGGCCAACCACAGGATATT	neStops	+	chrI	124066	124088	YAL017W	PSK1	3842	3864	FALSE	1281	1288	EGQPQDIW	EG*PQDIW	Q1283*	NA	NA	coding	stop	NA	NA
AGGGCCGCAATTTGGTTCTG	neStops	+	chrXIV	193312	193334	YNL242W	ATG2	1989	2011	FALSE	663	671	IGPQFGSVE	IGL*FGSVE	P665L	Q666*	NA	coding	stop	c(-3.289, NA)	3.289
AGGGCGACAGCGCAAGTGTG	neStops	+	chrX	360822	360844	YJL043W	YJL043W	693	715	FALSE	231	239	KGRQRKCVV	KG**RKCVV	R233*	Q234*	NA	coding	stop	c(NA, NA)	NA
AGGTCAAACTAAAGAAAGCT	neStops	-	chrXIII	332901	332923	YMR031C	EIS1	1821	1843	FALSE	607	615	LGQTKESLE	LG*TKESLE	Q609*	NA	NA	coding	stop	NA	NA
AGGTCAAGAACCTCCAGAGT	neStops	-	chrX	412079	412101	YJL012C	VTC4	1299	1321	FALSE	433	441	LGQEPPEWV	LG*EPPEWV	Q435*	NA	NA	coding	stop	NA	NA
AGGTCAATACTACGGATGTC	neStops	+	chrX	584386	584408	YJR084W	YJR084W	654	676	FALSE	218	226	LGQYYGCLE	LG*YYGCLE	Q220*	NA	NA	coding	stop	NA	NA
AGGTCAGTACTTCAGAATGA	neStops	+	chrXII	1046808	1046830	YLR454W	FMP27	2811	2833	FALSE	937	945	SGQYFRMMV	SG*YFRMMV	Q939*	NA	NA	coding	stop	NA	NA
AGGTCCAATTTGAAGTGTTT	neStops	-	chrX	553479	553501	YJR062C	NTA1	1349	1371	FALSE	450	457	EVQFEVFR	EV*FEVFR	Q452*	NA	NA	coding	stop	NA	NA
AGGTCCCAATCGAAATTTGG	neStops	+	chrII	44509	44531	YBL093C	ROX3	388	410	FALSE	130	137	PPNFDWDL	PPNFD*NL	W135*	D136N	NA	coding	stop	c(NA, -0.02)	0.02
AGGTCGAGGTCATGATATGT	neStops	+	chrIX	411478	411500	YIR029W	DAL2	672	694	FALSE	224	232	PGRGHDMSD	PG*GHDMSD	R226*	NA	NA	coding	stop	NA	NA
AGGTGCCCACGTTCGTGACG	neStops	+	chrV	437567	437589	YER134C	YER134C	215	237	FALSE	72	79	TASRTWAP	TASRT*TP	W77*	A78T	NA	coding	stop	c(NA, -1.6)	1.6
AGGTTCCAGAAGGATAGGAA	neStops	-	chrXI	70792	70814	YKL197C	PEX1	3052	3074	FALSE	1018	1025	RFQKDRNG	RF*KDRNG	Q1020*	NA	NA	coding	stop	NA	NA
AGGTTCCATTTCACAGGTTC	neStops	-	chrXVI	485162	485184	YPL036W	PMA2	2320	2342	FALSE	774	781	PEPVKWNL	PEPVK*NL	W779*	NA	NA	coding	stop	NA	NA
AGGTTTCAGTCGTCAGCATC	neStops	+	chrVIII	99288	99310	YHL004W	MRP4	70	92	FALSE	24	31	RFQSSASG	RF*SSASG	Q26*	NA	NA	coding	stop	NA	NA
AGGTTTCCAGGCTAGCTTCA	neStops	+	chrIV	900283	900305	YDR217C	RAD9	3176	3198	FALSE	1059	1066	ALKLAWKP	ALKLA*KP	W1064*	NA	NA	coding	stop	NA	NA
AGTAAATCAGTCTTTATCGA	neStops	+	chrII	103130	103152	YBL063W	KIP1	1245	1267	FALSE	415	423	QVNQSLSKD	QVN*SLSKD	Q418*	NA	NA	coding	stop	NA	NA
AGTAACCAGAGTATAAGACT	neStops	-	chrX	488111	488133	YJR031C	GEA1	2680	2702	FALSE	894	901	SNQSIRLG	SN*SIRLG	Q896*	NA	NA	coding	stop	NA	NA
AGTAACCATTCTTTACTCTC	neStops	+	chrXI	473817	473839	YKR018C	YKR018C	2062	2084	FALSE	688	695	PESKEWLL	PESKE*LL	W693*	NA	NA	coding	stop	NA	NA
AGTAACCCACGTTCGCAGTG	neStops	+	chrVIII	400792	400814	YHR151C	MTC6	35	57	FALSE	12	19	SSLRTWVT	SSLRT*IT	W17*	V18I	NA	coding	stop	c(NA, -0.132)	0.132
AGTAAGACAGCATTCTAAAG	neStops	-	chrII	463136	463158	YBR112C	CYC8	2613	2635	FALSE	871	879	EVRQHSKEE	EVR*HSKEE	Q874*	NA	NA	coding	stop	NA	NA
AGTAATGCCAGCCAGCGGCA	neStops	-	chrXIV	36132	36154	YNL321W	VNX1	1437	1459	FALSE	479	487	FRAAGWHYY	FRAAG*HYY	W484*	NA	NA	coding	stop	NA	NA
AGTAATTCGAATAATCAACC	neStops	+	chrVII	47040	47062	YGL241W	KAP114	1596	1618	FALSE	532	540	KVIRIINQV	KVI*IINQV	R535*	NA	NA	coding	stop	NA	NA
AGTACAAAACAGTAGAAATG	neStops	+	chrIV	962782	962804	YDR251W	PAM1	2169	2191	FALSE	723	731	TVQNSRNAD	TV*NSRNAD	Q725*	NA	NA	coding	stop	NA	NA
AGTACAAGATCATAATTCGA	neStops	-	chrXII	861867	861889	YLR370C	ARC18	366	388	FALSE	122	130	PVQDHNSMD	PV*DHNSMD	Q124*	NA	NA	coding	stop	NA	NA
AGTACAAGTTAGCGAGCTAC	neStops	-	chrIV	1420595	1420617	YDR482C	CWC21	222	244	FALSE	74	82	EVQVSELRD	EV*VSELRD	Q76*	NA	NA	coding	stop	NA	NA
AGTACAGGTAGATGTTAGTA	neStops	+	chrIX	361538	361560	YIR003W	AIM21	654	676	FALSE	218	226	KVQVDVSKD	KV*VDVSKD	Q220*	NA	NA	coding	stop	NA	NA
AGTACCACGACCTAAACCTT	neStops	+	chrXII	537286	537308	YLR191W	PEX13	15	37	FALSE	5	13	AVPRPKPWE	AVL*PKPWE	P7L	R8*	NA	coding	stop	c(-5.037, NA)	5.037
AGTACGCAAAAGGGTATTGA	neStops	-	chrII	265787	265809	YBR013C	YBR013C	73	95	FALSE	25	32	STQKGIEG	SM*KGIEG	T26M	Q27*	NA	coding	stop	c(2, NA)	2
AGTAGACCATGGCTTGGCCT	neStops	-	chrXV	219728	219750	YOL058W	ARG1	518	540	FALSE	173	180	TKAKPWST	TKAKP*ST	W178*	NA	NA	coding	stop	NA	NA
AGTAGTCAAGTAAACCCTGA	neStops	+	chrXI	127781	127803	YKL171W	NNK1	307	329	FALSE	103	110	SSQVNPEG	SS*VNPEG	Q105*	NA	NA	coding	stop	NA	NA
AGTAGTTCAGACAGCAGCTT	neStops	+	chrXV	277460	277482	YOL024W	YOL024W	375	397	FALSE	125	133	LVVQTAALD	LVV*TAALD	Q128*	NA	NA	coding	stop	NA	NA
AGTATACAGGGAGATACATG	neStops	+	chrIV	142982	143004	YDL176W	YDL176W	886	908	FALSE	296	303	SIQGDTCG	SI*GDTCG	Q298*	NA	NA	coding	stop	NA	NA
AGTATCCCCAGAAAAACCAT	neStops	-	chrXIV	357686	357708	YNL142W	MEP2	234	256	FALSE	78	86	FQWFFWGYS	FQWFF*KYS	W83*	G84K	NA	coding	stop	c(NA, -7.838)	7.838
AGTCAAAAGAAACCAACCCT	neStops	-	chrI	90352	90374	YAL029C	MYO4	1897	1919	FALSE	633	640	SQKKPTLG	S*KKPTLG	Q634*	NA	NA	coding	stop	NA	NA
AGTCAAAATTATTCCGACCG	neStops	-	chrIX	224402	224424	YIL073C	SPO22	1441	1463	FALSE	481	488	SQNYSDRG	S*NYSDRG	Q482*	NA	NA	coding	stop	NA	NA
AGTCAAATCAAGAAGTTATA	neStops	-	chrII	144296	144318	YBL039C	URA7	1411	1433	FALSE	471	478	SQIKKLYG	S*IKKLYG	Q472*	NA	NA	coding	stop	NA	NA
AGTCAACCAACAGAAACTAT	neStops	+	chrXIII	606311	606333	YMR172W	HOT1	331	353	FALSE	111	118	SQPTETIG	S*LTETIG	Q112*	P113L	NA	coding	stop	c(NA, -1.666)	1.666
AGTCAAGAAGAACCGCATAA	neStops	+	chrXIII	102639	102661	YML082W	YML082W	778	800	FALSE	260	267	SQEEPHNG	S*EEPHNG	Q261*	NA	NA	coding	stop	NA	NA
AGTCAAGAATTGGAATCGCC	neStops	-	chrXVI	609214	609236	YPR023C	EAF3	796	818	FALSE	266	273	SQELESPG	S*ELESPG	Q267*	NA	NA	coding	stop	NA	NA
AGTCAAGGAGCCGGTGTAGC	neStops	-	chrXIII	715960	715982	YMR222C	FSH2	328	350	FALSE	110	117	SQGAGVAG	S*GAGVAG	Q111*	NA	NA	coding	stop	NA	NA
AGTCAAGTAAACCCTGAAGG	neStops	+	chrXI	127784	127806	YKL171W	NNK1	310	332	FALSE	104	111	SQVNPEGG	S*VNPEGG	Q105*	NA	NA	coding	stop	NA	NA
AGTCAAGTCTCCTTAAGTGA	neStops	+	chrIII	100040	100062	YCL014W	BUD3	3760	3782	FALSE	1254	1261	SQVSLSEG	S*VSLSEG	Q1255*	NA	NA	coding	stop	NA	NA
AGTCAAGTTAATACAAGCCA	neStops	-	chrIV	452450	452472	YDR001C	NTH1	4	26	FALSE	2	9	SQVNTSQG	S*VNTSQG	Q3*	NA	NA	coding	stop	NA	NA
AGTCAAGTTGTGGTAAAGTT	neStops	-	chrI	171015	171037	YAR018C	KIN3	667	689	FALSE	223	230	SQVVVKLG	S*VVVKLG	Q224*	NA	NA	coding	stop	NA	NA
AGTCAATCCATGGGAATATT	neStops	+	chrXIII	871296	871318	YMR302C	YME2	1308	1330	FALSE	436	444	FPIFPWIDS	FPIFP*INS	W441*	D443N	NA	coding	stop	c(NA, 3.729)	3.729
AGTCAGACTTTGGCGCTTGC	neStops	-	chrXV	836034	836056	YOR273C	TPO4	376	398	FALSE	126	133	SQTLALAG	S*ILALAG	Q127*	T128I	NA	coding	stop	c(NA, -4.667)	4.667
AGTCAGCTGAAAAACTTGCT	neStops	-	chrV	45477	45499	YEL057C	SDD1	223	245	FALSE	75	82	SQLKNLLG	S*LKNLLG	Q76*	NA	NA	coding	stop	NA	NA
AGTCAGGACTTATATGCAAT	neStops	+	chrVIII	509588	509610	YHR205W	SCH9	226	248	FALSE	76	83	SQDLYAMG	S*DLYAMG	Q77*	NA	NA	coding	stop	NA	NA
AGTCAGGATTGTGGGTGCTT	neStops	-	chrII	762956	762978	YBR280C	SAF1	1720	1742	FALSE	574	581	SQDCGCLG	S*DCGCLG	Q575*	NA	NA	coding	stop	NA	NA
AGTCAGTCAAGAAGAATTGC	neStops	-	chrVIII	168435	168457	YHR029C	YHI9	105	127	FALSE	35	43	EVSQEELQA	EVS*EELQA	Q38*	NA	NA	coding	stop	NA	NA
AGTCAGTTAACAGGGACTTC	neStops	-	chrXV	716635	716657	YOR196C	LIP5	181	203	FALSE	61	68	SQLTGTSG	S*LTGTSG	Q62*	NA	NA	coding	stop	NA	NA
AGTCCAAAGAGATATTAATC	neStops	+	chrV	94961	94983	YEL030W	ECM10	318	340	FALSE	106	114	EVQRDINQV	EV*RDINQV	Q108*	NA	NA	coding	stop	NA	NA
AGTCCAAATATACAAACATG	neStops	+	chrXIV	28279	28301	YNL326C	PFA3	47	69	FALSE	16	23	TTCLYIWT	TTCLYI*T	W22*	NA	NA	coding	stop	NA	NA
AGTCCAAGATAATGAAACTA	neStops	+	chrVI	128332	128354	YFL007W	BLM10	4854	4876	FALSE	1618	1626	LVQDNETRG	LV*DNETRG	Q1620*	NA	NA	coding	stop	NA	NA
AGTCCACAAAGTCAAAAACA	neStops	-	chrXI	337252	337274	YKL054C	DEF1	1480	1502	FALSE	494	501	SPQSQKQG	SL*SQKQG	P495L	Q496*	NA	coding	stop	c(-2.026, NA)	2.026
AGTCCACTTCACCTGTAATT	neStops	-	chrIV	893806	893828	YDR214W	AHA1	932	954	FALSE	311	318	TKLQVKWT	TKLQVK*T	W317*	NA	NA	coding	stop	NA	NA
AGTCCAGGTGTCACCACAAG	neStops	-	chrXVI	511498	511520	YPL021W	ECM23	398	420	FALSE	133	140	ATCGDTWT	ATCGDT*T	W139*	NA	NA	coding	stop	NA	NA
AGTCCATAAGTACAATATGA	neStops	-	chrVII	473414	473436	YGL012W	ERG4	560	582	FALSE	187	194	SIILYLWT	SIILYL*T	W193*	NA	NA	coding	stop	NA	NA
AGTCCATATAGCACCAGCGA	neStops	+	chrXV	19806	19828	YOL158C	ENB1	1484	1506	FALSE	495	502	SIAGAIWT	SIAGAI*T	W501*	NA	NA	coding	stop	NA	NA
AGTCCATCCACGCACCTTCT	neStops	+	chrII	48406	48428	YBL091C	MAP2	201	223	FALSE	67	75	YPEGAWMDY	YPEGA*INY	W72*	M73I	D74N	coding	stop	c(NA, -1.571, -2.791)	2.791
AGTCGACGTCAGTCACCTCC	neStops	-	chrXII	757284	757306	YLR311C	YLR311C	307	329	FALSE	103	110	SRRQSPPG	S*CQSPPG	R104*	R105C	NA	coding	stop	c(NA, -8)	8
AGTCGAGGGTCTTCAACAAG	neStops	-	chrXIII	325374	325396	YMR026C	PEX12	40	62	FALSE	14	21	SRGSSTSG	S*GSSTSG	R15*	NA	NA	coding	stop	NA	NA
AGTCTCAAAGGCAGAATGAT	neStops	+	chrX	529127	529149	YJR050W	ISY1	431	453	FALSE	144	151	QSQRQNDG	QF*RQNDG	S145F	Q146*	NA	coding	stop	c(-3.212, NA)	3.212
AGTCTCCCACTGCTTCAAAC	neStops	-	chrVII	473594	473616	YGL012W	ERG4	740	762	FALSE	247	254	ACLKQWET	ACLKQ*KT	W252*	E253K	NA	coding	stop	c(NA, -3.395)	3.395
AGTGACCAGGAAGCCCAGCG	neStops	+	chrIX	273731	273753	YIL044C	AGE2	94	116	FALSE	32	39	PRWASWSL	PRWAS*SL	W37*	NA	NA	coding	stop	NA	NA
AGTGAGCAAGCGATGGCCAG	neStops	+	chrVIII	417975	417997	YHR159W	TDA11	427	449	FALSE	143	150	SEQAMASG	SE*AMASG	Q145*	NA	NA	coding	stop	NA	NA
AGTGCAAAGAACTGTTAATA	neStops	-	chrXII	308258	308280	YLR087C	CSF1	7452	7474	FALSE	2484	2492	PVQRTVNKE	PV*RTVNKE	Q2486*	NA	NA	coding	stop	NA	NA
AGTGCAAAGAATCACAAGAA	neStops	+	chrIII	91821	91843	YCL018W	LEU2	498	520	FALSE	166	174	EVQRITRMA	EV*RITRMA	Q168*	NA	NA	coding	stop	NA	NA
AGTGCAATATAACTCCGCCA	neStops	-	chrXV	1042832	1042854	YOR375C	GDH1	189	211	FALSE	63	71	RVQYNSAKG	RV*YNSAKG	Q65*	NA	NA	coding	stop	NA	NA
AGTGCAATATAAGTCTATCA	neStops	+	chrXIII	648827	648849	YMR192W	GYL1	1710	1732	FALSE	570	578	EVQYKSITE	EV*YKSITE	Q572*	NA	NA	coding	stop	NA	NA
AGTGCACAAGAAAGCGAACA	neStops	+	chrXIII	708366	708388	YMR219W	ESC1	1234	1256	FALSE	412	419	SAQESEQG	SV*ESEQG	A413V	Q414*	NA	coding	stop	numeric(0)	NA
AGTGCCGAAATTCCGATGAA	neStops	-	chrX	660027	660049	YJR127C	RSF2	3011	3033	FALSE	1004	1011	QCRNSDEW	QC*NSDEW	R1006*	NA	NA	coding	stop	NA	NA
AGTGGATCAAGATTCAGCAG	neStops	-	chrXIII	474919	474941	YMR104C	YPK2	513	535	FALSE	171	179	RVDQDSAGE	RVD*DSAGE	Q174*	NA	NA	coding	stop	NA	NA
AGTGGCCCAAAAGTTGGAGG	neStops	+	chrXVI	416395	416417	YPL074W	YTA6	633	655	FALSE	211	219	EVAQKLEEE	EVV*KLEEE	A213V	Q214*	NA	coding	stop	c(-1.574, NA)	1.574
AGTGGCGCAACTAGGTTCTT	neStops	+	chrX	151488	151510	YJL140W	RPB4	528	550	FALSE	176	184	EVAQLGSLA	EVV*LGSLA	A178V	Q179*	NA	coding	stop	c(-3.965, NA)	3.965
AGTGTGTCAAGGCTATGAAG	neStops	+	chrX	707801	707823	YJR149W	YJR149W	642	664	FALSE	214	222	IVCQGYEAG	IVC*GYEAG	Q217*	NA	NA	coding	stop	NA	NA
AGTGTTCAAAGTGTAGGTGC	neStops	-	chrII	323290	323312	YBR043C	QDR3	634	656	FALSE	212	219	SVQSVGAG	SV*SVGAG	Q214*	NA	NA	coding	stop	NA	NA
AGTGTTGCAAGCGGATCTTC	neStops	+	chrXIII	529534	529556	YMR129W	POM152	1731	1753	FALSE	577	585	KVLQADLPG	KVL*ADLPG	Q580*	NA	NA	coding	stop	NA	NA
AGTGTTTCAAAAGGCGAGAG	neStops	-	chrXIV	20167	20189	YNL329C	PEX6	2445	2467	FALSE	815	823	RVFQKAREA	RVF*KAREA	Q818*	NA	NA	coding	stop	NA	NA
AGTGTTTCGACAGCAAGTAA	neStops	+	chrXIII	710897	710919	YMR219W	ESC1	3765	3787	FALSE	1255	1263	EVFRQQVKD	EVF*QQVKD	R1258*	NA	NA	coding	stop	numeric(0)	NA
AGTTAACCAGACCAGATTTC	neStops	-	chrIV	311235	311257	YDL080C	THI3	1215	1237	FALSE	405	413	GVNQTRFPV	GVN*TRFPV	Q408*	NA	NA	coding	stop	NA	NA
AGTTACACCATCCAACACAT	neStops	-	chrXIV	96310	96332	YNL285W	YNL285W	138	160	FALSE	46	54	RPCVGWCNC	RPCVG*YNC	W51*	C52Y	NA	coding	stop	c(NA, -11)	11
AGTTCAAAAAAATCTTTGGC	neStops	-	chrII	12544	12566	YBL106C	SRO77	1314	1336	FALSE	438	446	SVQKNLWLG	SV*KNLWLG	Q440*	NA	NA	coding	stop	NA	NA
AGTTCAAAATCTTCGGAGCT	neStops	-	chrIV	818740	818762	YDR179C	CSN9	435	457	FALSE	145	153	LVQNLRSWE	LV*NLRSWE	Q147*	NA	NA	coding	stop	NA	NA
AGTTCAATGGAGAGTGCCTT	neStops	+	chrXIII	288747	288769	YMR011W	HXT2	669	691	FALSE	223	231	SVQWRVPLG	SV*WRVPLG	Q225*	NA	NA	coding	stop	NA	NA
AGTTCACCAACCTTTAAATA	neStops	+	chrVIII	348613	348635	YHR119W	SET1	2571	2593	FALSE	857	865	RVHQPLNTV	RVY*PLNTV	H859Y	Q860*	NA	coding	stop	c(-4.417, NA)	4.417
AGTTCACCAATGGAATATAA	neStops	-	chrVIII	76324	76346	YHL014C	YLF2	969	991	FALSE	323	331	EVHQWNIRE	EVY*WNIRE	H325Y	Q326*	NA	coding	stop	c(-2.633, NA)	2.633
AGTTCCAGTGCCTCTTGCTA	neStops	-	chrXII	106760	106782	YLL019C	KNS1	1118	1140	FALSE	373	380	QFQCLLLR	QF*CLLLR	Q375*	NA	NA	coding	stop	NA	NA
AGTTCGAGTGGCTGCTCCGG	neStops	+	chrXV	769593	769615	YOR229W	WTM2	1185	1207	FALSE	395	403	EVRVAAPEE	EV*VAAPEE	R397*	NA	NA	coding	stop	NA	NA
AGTTCTTCAAAGAGCAGGTG	neStops	-	chrIII	131407	131429	YCR009C	RVS161	114	136	FALSE	38	46	KVLQRAGEA	KVF*RAGEA	L40F	Q41*	NA	coding	stop	c(-2.759, NA)	2.759
AGTTGTGCAGCCACAACTAT	neStops	+	chrVII	110107	110129	YGL205W	POX1	1950	1972	FALSE	650	658	KVVQPQLLA	KVV*PQLLA	Q653*	NA	NA	coding	stop	NA	NA
AGTTTACCAAAGATTAGGAT	neStops	-	chrIV	1014427	1014449	YDR277C	MTH1	1254	1276	FALSE	418	426	QVYQRLGLD	QVY*RLGLD	Q421*	NA	NA	coding	stop	NA	NA
AGTTTACGAAATGGACACGA	neStops	+	chrIV	622607	622629	YDR089W	VTC5	496	518	FALSE	166	173	SLRNGHEG	SL*NGHEG	R168*	NA	NA	coding	stop	NA	NA
AGTTTCCAAATGCAAGTGTC	neStops	-	chrIX	371769	371791	YIR007W	EGH1	1066	1088	FALSE	356	363	PDTCIWKL	PDTCI*KL	W361*	NA	NA	coding	stop	NA	NA
AGTTTCCAGTCATGTTTACA	neStops	+	chrXIII	576161	576183	YMR160W	YMR160W	1096	1118	FALSE	366	373	SFQSCLQG	SF*SCLQG	Q368*	NA	NA	coding	stop	NA	NA
ATAAACAAGATTTCGATCAT	neStops	-	chrX	502048	502070	YJR036C	HUL4	1322	1344	FALSE	441	448	YKQDFDHW	YK*DFDHW	Q443*	NA	NA	coding	stop	NA	NA
ATAAACAAGCTCAACTGACA	neStops	+	chrXV	406435	406457	YOR039W	CKB2	668	690	FALSE	223	230	HKQAQLTR	HK*AQLTR	Q225*	NA	NA	coding	stop	NA	NA
ATAAACCATTCAGCCCAAGA	neStops	+	chrXIV	649785	649807	YNR013C	PHO91	1906	1928	FALSE	636	643	PSWAEWFM	PSWAE*FM	W641*	NA	NA	coding	stop	NA	NA
ATAAATCAAGAGGGAGGCGA	neStops	-	chrIV	1470822	1470844	YDR512C	EMI1	220	242	FALSE	74	81	INQEGGDG	IN*EGGDG	Q76*	NA	NA	coding	stop	NA	NA
ATAACCAAGACGAGCTGTTG	neStops	+	chrXIII	819263	819285	YMR276W	DSK2	437	459	FALSE	146	153	NNQDELLR	NN*DELLR	Q148*	NA	NA	coding	stop	NA	NA
ATAACCCAACCTGGAATCAT	neStops	-	chrVII	24124	24146	YGL253W	HXK2	190	212	FALSE	64	71	PMIPGWVM	PMIPG*IM	W69*	V70I	NA	coding	stop	c(NA, -0.847)	0.847
ATAACTCAACAGGGTGATGT	neStops	+	chrXV	991925	991947	YOR349W	CIN1	2137	2159	FALSE	713	720	ITQQGDVG	II*QGDVG	T714I	Q715*	NA	coding	stop	c(-5.7, NA)	5.7
ATAAGACAAATTCTTCACAC	neStops	-	chrXIII	543927	543949	YMR137C	PSO2	1015	1037	FALSE	339	346	IRQILHTG	IR*ILHTG	Q341*	NA	NA	coding	stop	NA	NA
ATAAGCAAGATAATAGCAAC	neStops	-	chrV	108717	108739	YEL023C	YEL023C	1814	1836	FALSE	605	612	DKQDNSNG	DK*DNSNG	Q607*	NA	NA	coding	stop	NA	NA
ATAAGCAATCTGCATCTTCC	neStops	+	chrIV	1232169	1232191	YDR379W	RGA2	2003	2025	FALSE	668	675	DKQSASSR	DK*SASSR	Q670*	NA	NA	coding	stop	NA	NA
ATAAGCAGCATAGTCACGTT	neStops	-	chrVII	889892	889914	YGR196C	FYV8	2273	2295	FALSE	758	765	YKQHSHVR	YK*HSHVR	Q760*	NA	NA	coding	stop	NA	NA
ATAATACCATACTTCGTTTA	neStops	+	chrXVI	318187	318209	YPL123C	RNY1	737	759	FALSE	246	253	SLNEVWYY	SLNEV*YY	W251*	NA	NA	coding	stop	NA	NA
ATAATCAAGTGGTACCGAAA	neStops	+	chrI	133454	133476	YAL011W	SWC3	1256	1278	FALSE	419	426	DNQVVPKR	DN*VVPKR	Q421*	NA	NA	coding	stop	NA	NA
ATAATCGAAAGAGACCCTTC	neStops	-	chrXIII	81859	81881	YML095C	RAD10	233	255	FALSE	78	85	YNRKRPFR	YN*KRPFR	R80*	NA	NA	coding	stop	NA	NA
ATAATGACCACAGCTCAGCA	neStops	-	chrIV	1138508	1138530	YDR334W	SWR1	2577	2599	FALSE	859	867	NLAELWSLL	NLAEL*SLL	W864*	NA	NA	coding	stop	NA	NA
ATAATGCAAGGAATCAAGGG	neStops	-	chrV	54148	54170	YEL053C	MAK10	1933	1955	FALSE	645	652	IMQGIKGG	IM*GIKGG	Q647*	NA	NA	coding	stop	NA	NA
ATAATGCAGCTATTGGGTTT	neStops	-	chrXIII	443967	443989	YMR088C	VBA1	1114	1136	FALSE	372	379	IMQLLGLG	IM*LLGLG	Q374*	NA	NA	coding	stop	NA	NA
ATACAAAAATATGTAACTCC	neStops	-	chrIV	727745	727767	YDR136C	VPS61	517	539	FALSE	173	180	IQKYVTPG	I*KYVTPG	Q174*	NA	NA	coding	stop	NA	NA
ATACAAAATGGCCTCCAGGT	neStops	-	chrXI	542302	542324	YKR054C	DYN1	5602	5624	FALSE	1868	1875	IQNGLQVG	I*NGLQVG	Q1869*	NA	NA	coding	stop	NA	NA
ATACAAGAAGATTATCAGAG	neStops	-	chrII	322981	323003	YBR043C	QDR3	943	965	FALSE	315	322	IQEDYQRG	I*EDYQRG	Q316*	NA	NA	coding	stop	NA	NA
ATACAAGATATTAAAAAGCA	neStops	+	chrX	39916	39938	YJL209W	CBP1	1912	1934	FALSE	638	645	IQDIKKHG	I*DIKKHG	Q639*	NA	NA	coding	stop	NA	NA
ATACAAGGCGGTATCCTGTC	neStops	-	chrIX	236829	236851	YIL067C	YIL067C	910	932	FALSE	304	311	IQGGILSG	I*GGILSG	Q305*	NA	NA	coding	stop	NA	NA
ATACAAGTAGATAACACAAA	neStops	+	chrIV	429463	429485	YDL013W	SLX5	397	419	FALSE	133	140	IQVDNTNG	I*VDNTNG	Q134*	NA	NA	coding	stop	NA	NA
ATACAATATTCGCCAAATTC	neStops	+	chrXII	137372	137394	YLL006W	MMM1	787	809	FALSE	263	270	IQYSPNSG	I*YSPNSG	Q264*	NA	NA	coding	stop	NA	NA
ATACAATCAAATGTATTCTA	neStops	-	chrIV	492939	492961	YDR026C	NSI1	1308	1330	FALSE	436	444	RYNQMYSRG	RYN*MYSRG	Q439*	NA	NA	coding	stop	NA	NA
ATACAATCAACTATGCCCGC	neStops	+	chrXI	366121	366143	YKL038W	RGT1	517	539	FALSE	173	180	IQSTMPAG	I*LTMPAG	Q174*	S175L	NA	coding	stop	c(NA, -1.483)	1.483
ATACACACAACTACTATATG	neStops	-	chrXIII	776149	776171	YMR253C	YMR253C	1020	1042	FALSE	340	348	TYTQLLYAV	TYI*LLYAV	T342I	Q343*	NA	coding	stop	c(-4.509, NA)	4.509
ATACAGCTGATGAATCCAGA	neStops	+	chrXVI	763997	764019	YPR117W	YPR117W	3973	3995	FALSE	1325	1332	IQLMNPDG	I*LMNPDG	Q1326*	NA	NA	coding	stop	NA	NA
ATACAGGAAGTGCCTCACGA	neStops	-	chrIV	124217	124239	YDL188C	PPH22	760	782	FALSE	254	261	IQEVPHEG	I*EVPHEG	Q255*	NA	NA	coding	stop	NA	NA
ATACCAAAAATGTATTATTA	neStops	-	chrXIII	833583	833605	YMR282C	AEP2	1494	1516	FALSE	498	506	KYQKCIIKE	KY*KCIIKE	Q500*	NA	NA	coding	stop	NA	NA
ATACCAAATACTGTCGTTCT	neStops	-	chrXII	265154	265176	YLR063W	BMT6	998	1020	FALSE	333	340	SENDSIWY	SENDSI*Y	W339*	NA	NA	coding	stop	NA	NA
ATACCAACAATCATATAAGG	neStops	-	chrIV	158573	158595	YDL169C	UGX2	141	163	FALSE	47	55	QYQQSYKVV	QY**SYKVV	Q49*	Q50*	NA	coding	stop	c(NA, NA)	NA
ATACCAAGGATCTTCAATAA	neStops	+	chrXVI	692011	692033	YPR073C	LTP1	386	408	FALSE	129	136	TIIEDPWY	TIIEDP*Y	W135*	NA	NA	coding	stop	NA	NA
ATACCAAGGTCTAAATTCAC	neStops	-	chrXV	879642	879664	YOR299W	BUD7	1208	1230	FALSE	403	410	PSEFRPWY	PSEFRP*Y	W409*	NA	NA	coding	stop	NA	NA
ATACCACAATGAAAAAATAA	neStops	-	chrII	127420	127442	YBL048W	RRT1	122	144	FALSE	41	48	AFIFSLWY	AFIFSL*Y	W47*	NA	NA	coding	stop	NA	NA
ATACCACTTACCAGTCCAGA	neStops	-	chrXII	815116	815138	YLR342W	FKS1	5120	5142	FALSE	1707	1714	AFWTGKWY	AFWTGK*Y	W1713*	NA	NA	coding	stop	NA	NA
ATACCAGGAACACTACACTC	neStops	-	chrVIII	269514	269536	YHR082C	KSP1	2013	2035	FALSE	671	679	SYQEHYTQD	SY*EHYTQD	Q673*	NA	NA	coding	stop	NA	NA
ATACCAGGCATCAACAGAGC	neStops	-	chrXI	464719	464741	YKR013W	PRY2	761	783	FALSE	254	261	TGSVDAWY	TGSVDA*Y	W260*	NA	NA	coding	stop	NA	NA
ATACCAGTTTGCATGGAGTT	neStops	+	chrXII	587372	587394	YLR224W	UCC1	909	931	FALSE	303	311	SYQFAWSLA	SY*FAWSLA	Q305*	NA	NA	coding	stop	NA	NA
ATACCATCTTGTGGAAACGT	neStops	-	chrX	222117	222139	YJL106W	IME2	728	750	FALSE	243	250	AYVSTRWY	AYVSTK*Y	R248K	W249*	NA	coding	stop	c(-3, NA)	3
ATACCATGTTACATTTAAAG	neStops	-	chrVII	777027	777049	YGR143W	SKN1	1835	1857	FALSE	612	619	STLNVTWY	STLNVT*Y	W618*	NA	NA	coding	stop	NA	NA
ATACCATTTCTTCGCGAATA	neStops	+	chrVIII	498237	498259	YHR199C	AIM46	164	186	FALSE	55	62	SIFAKKWY	SIFAKK*Y	W61*	NA	NA	coding	stop	NA	NA
ATACCCAAAAGAGCTGAATT	neStops	+	chrXV	323620	323642	YOL002C	IZH2	723	745	FALSE	241	249	TQIQLFWVL	TQIQLF*IL	W247*	V248I	NA	coding	stop	c(NA, -0.294)	0.294
ATACCCAAGGCCACTGATTG	neStops	+	chrXIII	825649	825671	YMR279C	YMR279C	681	703	FALSE	227	235	DPNQWPWVF	DPNQWP*IF	W233*	V234I	NA	coding	stop	c(NA, -0.4)	0.4
ATACCGAATCGTTCAACACG	neStops	+	chrX	600189	600211	YJR092W	BUD4	1455	1477	FALSE	485	493	EYRIVQHEE	EY*IVQHEE	R487*	NA	NA	coding	stop	NA	NA
ATACCGCCAATTACTACAAC	neStops	-	chrIV	103050	103072	YDL199C	YDL199C	282	304	FALSE	94	102	PYRQLLQQA	PYC*LLQQA	R96C	Q97*	NA	coding	stop	c(-0.618, NA)	0.618
ATACCTGCAACTCATAAAGT	neStops	-	chrXII	281339	281361	YLR073C	RFU1	261	283	FALSE	87	95	EYLQLIKLE	EYL*LIKLE	Q90*	NA	NA	coding	stop	NA	NA
ATACGAAAATATTTGTCGAT	neStops	+	chrXIII	402549	402571	YMR066W	SOV1	1009	1031	FALSE	337	344	IRKYLSIG	I*KYLSIG	R338*	NA	NA	coding	stop	NA	NA
ATACGAATACCACGAGGCAG	neStops	+	chrVII	414534	414556	YGL045W	RIM8	433	455	FALSE	145	152	IRIPRGRG	I*IPRGRG	R146*	NA	NA	coding	stop	NA	NA
ATACGAATTCTGACAAAGAT	neStops	-	chrXI	189623	189645	YKL134C	2021-10-01	1798	1820	FALSE	600	607	IRILTKIG	I*ILTKIG	R601*	NA	NA	coding	stop	NA	NA
ATACGACTAATCAAGGAAGA	neStops	+	chrXIV	574596	574618	YNL032W	SIW14	91	113	FALSE	31	38	IRLIKEDG	I*LIKEDG	R32*	NA	NA	coding	stop	NA	NA
ATACGAGCATCGCAAGGAAA	neStops	+	chrXII	538145	538167	YLR191W	PEX13	874	896	FALSE	292	299	IRASQGNG	I*VSQGNG	R293*	A294V	NA	coding	stop	c(NA, 0.129)	0.129
ATACGATATAAAAAATCTTT	neStops	-	chrX	177233	177255	YJL129C	TRK1	52	74	FALSE	18	25	IRYKKSFG	I*YKKSFG	R19*	NA	NA	coding	stop	NA	NA
ATACGCCATCTATTGTCCAA	neStops	-	chrXIII	631617	631639	YMR185W	RTP1	2593	2615	FALSE	865	872	PLDNRWRM	PLDNR*HM	W870*	R871H	NA	coding	stop	c(NA, -5)	5
ATACGGTCAACCAGATAAAA	neStops	-	chrXIII	423897	423919	YMR078C	CTF18	810	832	FALSE	270	278	LYGQPDKKD	LYG*PDKKD	Q273*	NA	NA	coding	stop	NA	NA
ATACTACAAACGGCAAAAGT	neStops	+	chrIV	1343972	1343994	YDR440W	DOT1	1480	1502	FALSE	494	501	ILQTAKVG	IL*TAKVG	Q496*	NA	NA	coding	stop	NA	NA
ATACTACAATTGCCCAAGTA	neStops	+	chrXII	759693	759715	YLR312W-A	MRPL15	214	236	FALSE	72	79	ILQLPKYG	IL*LPKYG	Q74*	NA	NA	coding	stop	NA	NA
ATACTCAAAATTTGTTAAAC	neStops	-	chrIV	657117	657139	YDR101C	ARX1	329	351	FALSE	110	117	DTQNLLNW	DI*NLLNW	T111I	Q112*	NA	coding	stop	c(-0.533, NA)	0.533
ATACTTCCAATCTGTTGTCG	neStops	+	chrVII	246348	246370	YGL139W	FLC3	633	655	FALSE	211	219	LYFQSVVVV	LYF*SVVVV	Q214*	NA	NA	coding	stop	NA	NA
ATAGAACAAGACTTCAATGA	neStops	-	chrVII	192519	192541	YGL164C	YRB30	760	782	FALSE	254	261	IEQDFNDG	IE*DFNDG	Q256*	NA	NA	coding	stop	NA	NA
ATAGAGCAAGTGGCCTTCAA	neStops	+	chrIV	574410	574432	YDR061W	YDR061W	247	269	FALSE	83	90	IEQVAFKG	IE*VAFKG	Q85*	NA	NA	coding	stop	NA	NA
ATAGATCCCAGTATTGCAAA	neStops	+	chrV	326239	326261	YER083C	GET2	771	793	FALSE	257	265	TLLQYWDLL	TLLQY*NLL	W262*	D263N	NA	coding	stop	c(NA, -3.207)	3.207
ATAGCCCAAAATCGGGAATC	neStops	+	chrXII	136049	136071	YLL007C	LMO1	229	251	FALSE	77	84	PDSRFWAI	PDSRF*TI	W82*	A83T	NA	coding	stop	c(NA, 0.332)	0.332
ATAGCCCAACCAATGTGATG	neStops	+	chrIII	204247	204269	YCR042C	TAF2	1129	1151	FALSE	377	384	PHHIGWAI	PHHIG*TI	W382*	A383T	NA	coding	stop	c(NA, -3.421)	3.421
ATAGTACAGTATGGATTACT	neStops	-	chrVII	1009289	1009311	YGR258C	RAD2	1456	1478	FALSE	486	493	IVQYGLLG	IV*YGLLG	Q488*	NA	NA	coding	stop	NA	NA
ATAGTGCGACCTCTTATGGT	neStops	-	chrXII	300938	300960	YLR085C	ARP6	1030	1052	FALSE	344	351	IVRPLMVG	IV*PLMVG	R346*	NA	NA	coding	stop	NA	NA
ATAGTTCCCATTGTGCAAAC	neStops	-	chrVII	44341	44363	YGL243W	TAD1	1035	1057	FALSE	345	353	SRFAQWELF	SRFAQ*KLF	W350*	E351K	NA	coding	stop	c(NA, -0.433)	0.433
ATATAAACAATTAAGAAAAA	neStops	+	chrVII	744688	744710	YGR125W	YGR125W	2364	2386	FALSE	788	796	QYKQLRKKA	QYK*LRKKA	Q791*	NA	NA	coding	stop	NA	NA
ATATACAGTGTGACGTAGGG	neStops	-	chrX	230780	230802	YJL103C	GSM1	80	102	FALSE	27	34	HIQCDVGR	HI*CDVGR	Q29*	NA	NA	coding	stop	NA	NA
ATATACCAAAGGGGTAAAGA	neStops	+	chrVII	313810	313832	YGL100W	SEH1	577	599	FALSE	193	200	IYQRGKDG	IY*RGKDG	Q195*	NA	NA	coding	stop	NA	NA
ATATACCAGAGGAAAGGATA	neStops	-	chrII	120583	120605	YBL052C	SAS3	1270	1292	FALSE	424	431	IYQRKGYG	IY*RKGYG	Q426*	NA	NA	coding	stop	NA	NA
ATATCAAAATGCTATCATCG	neStops	-	chrVII	178640	178662	YGL173C	XRN1	1452	1474	FALSE	484	492	KYQNAIIVE	KY*NAIIVE	Q486*	NA	NA	coding	stop	NA	NA
ATATCAAACTGCGAGATGTA	neStops	-	chrIV	150588	150610	YDL171C	GLT1	5031	5053	FALSE	1677	1685	KYQTARCMD	KY*TARCMD	Q1679*	NA	NA	coding	stop	NA	NA
ATATCAAGCATTCACAACTC	neStops	+	chrII	603449	603471	YBR187W	GDT1	816	838	FALSE	272	280	IYQAFTTQD	IY*AFTTQD	Q274*	NA	NA	coding	stop	NA	NA
ATATCACAGAAAAATCAGGA	neStops	-	chrII	755338	755360	YBR275C	RIF1	1747	1769	FALSE	583	590	ISQKNQEG	IL*KNQEG	S584L	Q585*	NA	coding	stop	c(-1.268, NA)	1.268
ATATCAGAAATATAAAAGTA	neStops	+	chrXIII	823839	823861	YMR278W	PRM15	1077	1099	FALSE	359	367	EYQKYKSMD	EY*KYKSMD	Q361*	NA	NA	coding	stop	NA	NA
ATATCAGGCCAAAATAGAGT	neStops	+	chrXII	908432	908454	YLR394W	CST9	483	505	FALSE	161	169	LYQAKIELD	LY*AKIELD	Q163*	NA	NA	coding	stop	NA	NA
ATATCAGGTACCCTTATTCG	neStops	-	chrIX	91174	91196	YIL137C	TMA108	1593	1615	FALSE	531	539	PYQVPLFGV	PY*VPLFGV	Q533*	NA	NA	coding	stop	NA	NA
ATATCAGTTACTAACTGAGT	neStops	-	chrVII	753448	753470	YGR130C	YGR130C	375	397	FALSE	125	133	QYQLLTELE	QY*LLTELE	Q127*	NA	NA	coding	stop	NA	NA
ATATCCATGTCCAGATCCAA	neStops	+	chrIV	1296569	1296591	YDR414C	ERD1	96	118	FALSE	32	40	ALWIWTWIL	ALWIWT*IL	W38*	NA	NA	coding	stop	NA	NA
ATATCCCATTTAGCAAAATC	neStops	-	chrXII	326199	326221	YLR092W	SUL2	2656	2678	FALSE	886	893	PDFAKWDI	PDFAK*NI	W891*	D892N	NA	coding	stop	c(NA, -3.018)	3.018
ATATCCTCCAAGATTTCATC	neStops	+	chrXV	457724	457746	YOR070C	GYP1	75	97	FALSE	25	33	SLMKSWRIS	SLMKS*KIS	W30*	R31K	NA	coding	stop	c(NA, 0.209)	0.209
ATATCGATGGCGCTTTGATG	neStops	+	chrIV	851629	851651	YDR197W	CBS2	402	424	FALSE	134	142	RYRWRFDEA	RY*WRFDEA	R136*	NA	NA	coding	stop	NA	NA
ATATCTACAAAACTACATGC	neStops	-	chrXV	313860	313882	YOL006C	TOP1	1506	1528	FALSE	502	510	KYLQNYMPG	KYL*NYMPG	Q505*	NA	NA	coding	stop	NA	NA
ATATCTCAGGTCGCTTTATT	neStops	+	chrVIII	129693	129715	YHR012W	VPS29	94	116	FALSE	32	39	ISQVALLG	IF*VALLG	S33F	Q34*	NA	coding	stop	c(-4.347, NA)	4.347
ATATGCAAATCATCAAGGAT	neStops	-	chrX	630383	630405	YJR109C	CPA2	2537	2559	FALSE	846	853	NMQIIKDG	NM*IIKDG	Q848*	NA	NA	coding	stop	NA	NA
ATATGCACAAATTGAGCAAG	neStops	-	chrVII	444190	444212	YGL027C	CWH41	1932	1954	FALSE	644	652	RYAQIEQEV	RYV*IEQEV	A646V	Q647*	NA	coding	stop	c(-2.292, NA)	2.292
ATATGGACCAATCCTTTAAG	neStops	+	chrXIV	776093	776115	YNR073C	MAN2	186	208	FALSE	62	70	HHLKDWSIC	HHLKD*SIC	W67*	NA	NA	coding	stop	NA	NA
ATATGGTCAAACTAACGGTT	neStops	-	chrVII	441799	441821	YGL028C	SCW11	1089	1111	FALSE	363	371	QYGQTNGWD	QYG*TNGWD	Q366*	NA	NA	coding	stop	NA	NA
ATATTACAACAAATGGGGAG	neStops	-	chrIV	102143	102165	YDL199C	YDL199C	1189	1211	FALSE	397	404	ILQQMGRG	IL*QMGRG	Q399*	NA	NA	coding	stop	NA	NA
ATATTCAAATGAGGCGAATG	neStops	+	chrXIII	51722	51744	YML109W	ZDS2	83	105	FALSE	28	35	NIQMRRMR	NI*MRRMR	Q30*	NA	NA	coding	stop	NA	NA
ATATTCCATTCGTAAATCTG	neStops	+	chrXV	194340	194362	YOL073C	DSC2	439	461	FALSE	147	154	PQIYEWNI	PQIYE*NI	W152*	NA	NA	coding	stop	NA	NA
ATATTTCCAATCTGTCGCTG	neStops	+	chrXVI	133657	133679	YPL221W	FLC1	615	637	FALSE	205	213	LYFQSVAVV	LYF*SVAVV	Q208*	NA	NA	coding	stop	NA	NA
ATCAAACCAGGAGGCCACTA	neStops	-	chrXV	482286	482308	YOR085W	OST3	254	276	FALSE	85	92	TIVASWFD	TIVAS*FD	W90*	NA	NA	coding	stop	NA	NA
ATCAAAGCAGTCGGAGCAAG	neStops	-	chrII	451894	451916	YBR105C	VID24	54	76	FALSE	18	26	TSKQSEQAA	TSK*SEQAA	Q21*	NA	NA	coding	stop	NA	NA
ATCAACAGATGACTGACAGA	neStops	+	chrII	207216	207238	YBL009W	ALK2	23	45	FALSE	8	15	DQQMTDRR	DQ*MTDRR	Q10*	NA	NA	coding	stop	NA	NA
ATCAACCACAAATGAAGGTA	neStops	+	chrVII	796949	796971	YGR154C	GTO1	898	920	FALSE	300	307	PYLHLWLI	PYLHL*LI	W305*	NA	NA	coding	stop	NA	NA
ATCAACCACCTTGCCTCATA	neStops	+	chrXIII	678340	678362	YMR207C	HFA1	5203	5225	FALSE	1735	1742	PYEARWLI	PYEAR*LI	W1740*	NA	NA	coding	stop	NA	NA
ATCAACCAGCCACCAGCTTC	neStops	+	chrI	154369	154391	YAR002C-A	ERP1	334	356	FALSE	112	119	PEAGGWLI	PEAGG*LI	W117*	NA	NA	coding	stop	NA	NA
ATCAACCCACAACAGTGTAC	neStops	+	chrII	340623	340645	YBR053C	YBR053C	107	129	FALSE	36	43	TGTLLWVD	TGTLL*ID	W41*	V42I	NA	coding	stop	c(NA, -0.43)	0.43
ATCAAGTCAAATGGCGAATA	neStops	-	chrXVI	488985	489007	YPL032C	SVL3	2358	2380	FALSE	786	794	SSSQMANMA	SSS*MANMA	Q789*	NA	NA	coding	stop	NA	NA
ATCAATCAATCAGGACCCTT	neStops	+	chrVIII	355221	355243	YHR123W	EPT1	316	338	FALSE	106	113	INQSGPLG	IN*SGPLG	Q108*	NA	NA	coding	stop	NA	NA
ATCAATCCAGAAAGTGATAA	neStops	-	chrXIII	107994	108016	YML081W	TDA9	3218	3240	FALSE	1073	1080	SVITFWID	SVITF*ID	W1078*	NA	NA	coding	stop	NA	NA
ATCAATCCATCTATTGGTTG	neStops	+	chrV	398588	398610	YER118C	SHO1	446	468	FALSE	149	156	SPTNRWID	SPTNR*ID	W154*	NA	NA	coding	stop	NA	NA
ATCAATGCAAACTGAAACCA	neStops	+	chrIV	1373107	1373129	YDR457W	TOM1	3318	3340	FALSE	1106	1114	KSMQTETME	KSM*TETME	Q1109*	NA	NA	coding	stop	NA	NA
ATCACAACAATTGCAGAACT	neStops	+	chrV	231777	231799	YER040W	GLN3	1983	2005	FALSE	661	669	LSQQLQNSE	LS**LQNSE	Q663*	Q664*	NA	coding	stop	c(NA, NA)	NA
ATCACAAGTATCACCTACAC	neStops	-	chrVII	1037859	1037881	YGR271C-A	EFG1	621	643	FALSE	207	215	GSQVSPTQD	GS*VSPTQD	Q209*	NA	NA	coding	stop	NA	NA
ATCACACAAGTAGGTCAAGG	neStops	+	chrVII	668726	668748	YGR092W	DBF2	538	560	FALSE	180	187	ITQVGQGG	II*VGQGG	T181I	Q182*	NA	coding	stop	c(-5.98, NA)	5.98
ATCACAGAACTTACTTGGTA	neStops	+	chrVI	188047	188069	YFR019W	FAB1	3546	3568	FALSE	1182	1190	SSQNLLGTG	SS*NLLGTG	Q1184*	NA	NA	coding	stop	NA	NA
ATCACAGTCACATTTAACGT	neStops	+	chrXVI	315358	315380	YPL125W	KAP120	1971	1993	FALSE	657	665	GSQSHLTWD	GS*SHLTWD	Q659*	NA	NA	coding	stop	NA	NA
ATCACCCCATCCGTCATTGT	neStops	+	chrX	25988	26010	YJL216C	IMA5	77	99	FALSE	26	33	SNNDGWGD	SNNDG*ND	W31*	G32N	NA	coding	stop	c(NA, -5.648)	5.648
ATCACGCAATTAGCCAAAGG	neStops	-	chrVI	173516	173538	YFR014C	CMK1	340	362	FALSE	114	121	ITQLAKGG	IM*LAKGG	T115M	Q116*	NA	coding	stop	c(-5.762, NA)	5.762
ATCACTACAAAATGACGAGC	neStops	-	chrVII	624165	624187	YGR067C	YGR067C	600	622	FALSE	200	208	SSLQNDELV	SSL*NDELV	Q203*	NA	NA	coding	stop	NA	NA
ATCAGACAAACCAACGTTCA	neStops	+	chrI	77699	77721	YAL035W	FUN12	1273	1295	FALSE	425	432	IRQTNVQG	IR*TNVQG	Q427*	NA	NA	coding	stop	NA	NA
ATCAGACCAATTTAACCAAC	neStops	+	chrX	341349	341371	YJL051W	IRC8	1563	1585	FALSE	521	529	TSDQFNQQE	TSD*FNQQE	Q524*	NA	NA	coding	stop	NA	NA
ATCAGCAAAAACCGGAAGAA	neStops	-	chrXIII	81907	81929	YML095C	RAD10	185	207	FALSE	62	69	NQQKPEEW	NQ*KPEEW	Q64*	NA	NA	coding	stop	NA	NA
ATCAGCACAGAATTCTACGG	neStops	+	chrIV	773871	773893	YDR159W	SAC3	1995	2017	FALSE	665	673	QSAQNSTVE	QSV*NSTVE	A667V	Q668*	NA	coding	stop	c(-0.168, NA)	0.168
ATCAGCGACTAATCGATCTC	neStops	+	chrXIII	707554	707576	YMR219W	ESC1	422	444	FALSE	141	148	HQRLIDLR	HQ*LIDLR	R143*	NA	NA	coding	stop	numeric(0)	NA
ATCATCAATCTTTGCTTGCA	neStops	+	chrXVI	913496	913518	YPR189W	SKI3	833	855	FALSE	278	285	NHQSLLAW	NH*SLLAW	Q280*	NA	NA	coding	stop	NA	NA
ATCATCCAGATCAAGGCGAC	neStops	-	chrXII	275087	275109	YLR070C	XYL2	103	125	FALSE	35	42	IIQIKATG	II*IKATG	Q37*	NA	NA	coding	stop	NA	NA
ATCATCCCATTTCATCTTCA	neStops	+	chrVII	613473	613495	YGR061C	ADE6	2471	2493	FALSE	824	831	SMKMKWDD	SMKMK*ND	W829*	D830N	NA	coding	stop	c(NA, -2.106)	2.106
ATCATGGCAGGAGAAGTACG	neStops	-	chrXIV	479096	479118	YNL079C	TPM1	48	70	FALSE	16	24	ESWQEKYEE	ESW*EKYEE	Q19*	NA	NA	coding	stop	NA	NA
ATCATGTCGAGGCTGCTGTG	neStops	-	chrIV	46618	46640	YDL227C	HO	1392	1414	FALSE	464	472	KSCRGCCVG	KSC*GCCVG	R467*	NA	NA	coding	stop	NA	NA
ATCATTACAATCTGTTGTTA	neStops	+	chrIV	1437922	1437944	YDR494W	RSM28	993	1015	FALSE	331	339	LSLQSVVMG	LSL*SVVMG	Q334*	NA	NA	coding	stop	NA	NA
ATCATTCAGGCAATGCTAGG	neStops	-	chrVIII	29587	29609	YHL035C	VMR1	3148	3170	FALSE	1050	1057	IIQAMLGG	II*AMLGG	Q1052*	NA	NA	coding	stop	NA	NA
ATCCAAAACCATAATAAGGC	neStops	-	chrXIII	885305	885327	YMR306W	FKS3	4147	4169	FALSE	1383	1390	PALLWFWI	PALLWF*I	W1389*	NA	NA	coding	stop	NA	NA
ATCCAAAACGAAGCACCATT	neStops	-	chrVII	891609	891631	YGR196C	FYV8	556	578	FALSE	186	193	IQNEAPLG	I*NEAPLG	Q187*	NA	NA	coding	stop	NA	NA
ATCCAAAAGGTGTTACAGGA	neStops	-	chrXIV	132859	132881	YNL271C	BNI1	2503	2525	FALSE	835	842	IQKVLQDG	I*KVLQDG	Q836*	NA	NA	coding	stop	NA	NA
ATCCAAACAAAAGGCTTTGA	neStops	-	chrVII	885171	885193	YGR193C	PDX1	549	571	FALSE	183	191	ISKQKALKE	ISK*KALKE	Q186*	NA	NA	coding	stop	NA	NA
ATCCAAACGGCGTCCTTATT	neStops	+	chrIX	194243	194265	YIL090W	ICE2	649	671	FALSE	217	224	IQTASLLG	I*MASLLG	Q218*	T219M	NA	coding	stop	c(NA, -3.205)	3.205
ATCCAACTTGTGGCTGGAGA	neStops	+	chrXIII	179296	179318	YML048W	GSF2	871	893	FALSE	291	298	IQLVAGEG	I*FVAGEG	Q292*	L293F	NA	coding	stop	c(NA, -4)	4
ATCCAAGATAGCGAATTCAA	neStops	+	chrXI	25566	25588	YKL216W	URA1	352	374	FALSE	118	125	IQDSEFNG	I*DSEFNG	Q119*	NA	NA	coding	stop	NA	NA
ATCCAAGGCGAACCCTTTAC	neStops	+	chrXIII	872060	872082	YMR302C	YME2	544	566	FALSE	182	189	PVKGSPWI	PVKGSP*I	W188*	NA	NA	coding	stop	NA	NA
ATCCAATGATCATCTGTTTC	neStops	+	chrXII	590656	590678	YLR227C	ADY4	1366	1388	FALSE	456	463	PETDDHWI	PETDDH*I	W462*	NA	NA	coding	stop	NA	NA
ATCCAATTAAACGAGCAAAC	neStops	-	chrX	180027	180049	YJL128C	PBS2	55	77	FALSE	19	26	IQLNEQTG	I*LNEQTG	Q20*	NA	NA	coding	stop	NA	NA
ATCCAATTATTACACCAAAA	neStops	+	chrXVI	161589	161611	YPL207W	TYW1	1681	1703	FALSE	561	568	IQLLHQKG	I*LLHQKG	Q562*	NA	NA	coding	stop	NA	NA
ATCCAATTGACGCTATTAAA	neStops	+	chrXI	167748	167770	YKL149C	DBR1	1060	1082	FALSE	354	361	PFNSVNWI	PFNSVN*I	W360*	NA	NA	coding	stop	NA	NA
ATCCAATTGATCTGCAGTTC	neStops	-	chrXV	144813	144835	YOL092W	YPQ1	610	632	FALSE	204	211	PELQINWM	PELQIN*M	W210*	NA	NA	coding	stop	NA	NA
ATCCAATTGGTTATTCAAAG	neStops	+	chrXIV	395792	395814	YNL123W	NMA111	1108	1130	FALSE	370	377	IQLVIQRG	I*LVIQRG	Q371*	NA	NA	coding	stop	NA	NA
ATCCAATTGTATTCCGTCGA	neStops	-	chrV	166589	166611	YER007C-A	TMA20	172	194	FALSE	58	65	IQLYSVDG	I*LYSVDG	Q59*	NA	NA	coding	stop	NA	NA
ATCCAATTGTCCCTGCTTTA	neStops	-	chrXVI	81167	81189	YPL248C	GAL4	1168	1190	FALSE	390	397	IQLSLLYG	I*LSLLYG	Q391*	NA	NA	coding	stop	NA	NA
ATCCAATTTCTCATGCCAGC	neStops	+	chrX	503924	503946	YJR038C	YJR038C	127	149	FALSE	43	50	PAGMRNWI	PAGMRN*I	W49*	NA	NA	coding	stop	NA	NA
ATCCAATTTGACCAACAAAA	neStops	-	chrX	656567	656589	YJR126C	VPS70	2101	2123	FALSE	701	708	IQFDQQNG	I*FDQQNG	Q702*	NA	NA	coding	stop	NA	NA
ATCCACAGCAGCACGTTAAT	neStops	+	chrXV	688840	688862	YOR188W	MSB1	3074	3096	FALSE	1025	1032	YPQQHVNR	YL*QHVNR	P1026L	Q1027*	NA	coding	stop	c(-2.863, NA)	2.863
ATCCACCCATGGGTCCCTCA	neStops	+	chrIV	459709	459731	YDR006C	SOK1	1517	1539	FALSE	506	513	PMRDPWVD	PMRDP*ID	W511*	V512I	NA	coding	stop	c(NA, -0.96)	0.96
ATCCACCGAGATTTGAAGCC	neStops	+	chrXVI	666766	666788	YPR054W	SMK1	487	509	FALSE	163	170	IHRDLKPG	IY*DLKPG	H164Y	R165*	NA	coding	stop	c(-6, NA)	6
ATCCAGAACCCGAGATACTG	neStops	-	chrX	463960	463982	YJR015W	YJR015W	1240	1262	FALSE	414	421	PQYLGFWI	PQYLGF*I	W420*	NA	NA	coding	stop	NA	NA
ATCCAGAATAAATGCATGTT	neStops	+	chrXVI	137866	137888	YPL219W	PCL8	1117	1139	FALSE	373	380	IQNKCMFG	I*NKCMFG	Q374*	NA	NA	coding	stop	NA	NA
ATCCAGAATTCTTTACTAAC	neStops	-	chrXI	628989	629011	YKR096W	ESL2	2197	2219	FALSE	733	740	PVSKEFWM	PVSKEF*M	W739*	NA	NA	coding	stop	NA	NA
ATCCAGATCAAGGGCCCTCG	neStops	-	chrIX	274517	274539	YIL043C	CBR1	388	410	FALSE	130	137	IQIKGPRG	I*IKGPRG	Q131*	NA	NA	coding	stop	NA	NA
ATCCAGCGAGCTCTGCTCGA	neStops	+	chrII	202563	202585	YBL013W	FMT1	508	530	FALSE	170	177	IQRALLEG	I**ALLEG	Q171*	R172*	NA	coding	stop	c(NA, NA)	NA
ATCCAGCGTCAGCTTGAATT	neStops	+	chrXI	506739	506761	YKR032W	YKR032W	223	245	FALSE	75	82	IQRQLEFG	I*CQLEFG	Q76*	R77C	NA	coding	stop	c(NA, -8)	8
ATCCAGGACAGAGAGGCCGA	neStops	-	chrXIII	230038	230060	YML021C	UNG1	754	776	FALSE	252	259	IQDREADG	I*DREADG	Q253*	NA	NA	coding	stop	NA	NA
ATCCAGTCCGGTACCGAGTT	neStops	+	chrVII	226591	226613	YGL148W	ARO2	193	215	FALSE	65	72	IQSGTEFG	I*FGTEFG	Q66*	S67F	NA	coding	stop	c(NA, -5.957)	5.957
ATCCAGTCGTGCCTGTCGAA	neStops	+	chrI	68939	68961	YAL039C	CYC3	565	587	FALSE	189	196	PFDRHDWI	PFDRHN*I	D194N	W195*	NA	coding	stop	c(-4.948, NA)	4.948
ATCCAGTTCGAATATCTACA	neStops	-	chrIV	385274	385296	YDL037C	BSC1	292	314	FALSE	98	105	IQFEYLQG	I*FEYLQG	Q99*	NA	NA	coding	stop	NA	NA
ATCCATAAAAGACCAGCATC	neStops	-	chrXVI	340355	340377	YPL111W	CAR1	412	434	FALSE	138	145	PDAGLLWI	PDAGLL*I	W144*	NA	NA	coding	stop	NA	NA
ATCCATATCCTAGACCTAGA	neStops	-	chrX	685122	685144	YJR138W	IML1	556	578	FALSE	186	193	PSRSRIWI	PSRSRI*I	W192*	NA	NA	coding	stop	NA	NA
ATCCCAACGTGCCGAAGGAG	neStops	+	chrXIV	80918	80940	YNL293W	MSB3	279	301	FALSE	93	101	ESQRAEGED	ES*CAEGED	Q95*	R96C	NA	coding	stop	c(NA, -1.447)	1.447
ATCCCAAGAGCAGTAAGTAG	neStops	+	chrXII	273508	273530	YLR069C	MEF1	386	408	FALSE	129	136	AATYCSWD	AATYCS*D	W135*	NA	NA	coding	stop	NA	NA
ATCCCAAGCTCCAAGTGAGT	neStops	-	chrXIV	444267	444289	YNL096C	RPS7B	27	49	FALSE	9	17	LSQAPSELE	LS*APSELE	Q11*	NA	NA	coding	stop	NA	NA
ATCCCACCTTGCAGTCAGGA	neStops	-	chrXIV	504460	504482	YNL065W	AQR1	737	759	FALSE	246	253	AVLTARWD	AVLTAK*D	R251K	W252*	NA	coding	stop	c(-0.539, NA)	0.539
ATCCCAGCCAATTTCCTTTA	neStops	-	chrVII	390159	390181	YGL060W	YBP2	95	117	FALSE	32	39	TLKEIGWD	TLKEID*D	G37D	W38*	NA	coding	stop	c(-5.38, NA)	5.38
ATCCCAGGTCTCCGATGGTG	neStops	-	chrIX	40604	40626	YIL160C	POT1	819	841	FALSE	273	281	ASQVSDGVA	AS*VSDGVA	Q275*	NA	NA	coding	stop	NA	NA
ATCCCAGTTTGTTAGGTTAA	neStops	+	chrXII	551475	551497	YLR203C	MSS51	464	486	FALSE	155	162	AVNLTNWD	AVNLTN*D	W161*	NA	NA	coding	stop	NA	NA
ATCCCATCCAACCAATATGT	neStops	+	chrXII	606442	606464	YLR231C	BNA5	656	678	FALSE	219	226	PDILVGWD	PDILVE*D	G224E	W225*	NA	coding	stop	c(-8, NA)	8
ATCCCATCTTGTCACTGCGC	neStops	+	chrXI	338553	338575	YKL054C	DEF1	179	201	FALSE	60	67	SGAVTRWD	SGAVTK*D	R65K	W66*	NA	coding	stop	c(0.925, NA)	0.925
ATCCCATGCATACGGCGACT	neStops	-	chrVIII	206123	206145	YHR048W	YHK8	1517	1539	FALSE	506	513	AKSPYAWD	AKSPYA*D	W512*	NA	NA	coding	stop	NA	NA
ATCCCATTTAATCCACGCCA	neStops	-	chrIX	154596	154618	YIL112W	HOS4	3002	3024	FALSE	1001	1008	PMAWIKWD	PMAWIK*D	W1007*	NA	NA	coding	stop	NA	NA
ATCCCCCACCAAACGGCAAG	neStops	-	chrXIV	780066	780088	YNR075W	COS10	151	173	FALSE	51	58	PLAVWWGM	PLAVW*KM	W56*	G57K	NA	coding	stop	c(NA, 2.156)	2.156
ATCCCCCCAAAGCTTTCCTG	neStops	-	chrVII	384312	384334	YGL063W	PUS2	659	681	FALSE	220	227	TTGKLWGD	TTGKL*KD	W225*	G226K	NA	coding	stop	c(NA, 4.771)	4.771
ATCCCTCAGGCAGTACTTTC	neStops	+	chrXIV	120600	120622	YNL275W	BOR1	1333	1355	FALSE	445	452	IPQAVLSG	IF*AVLSG	P446F	Q447*	NA	coding	stop	c(-11, NA)	11
ATCCCTCAGGTTATCAGCGA	neStops	+	chrXII	964784	964806	YLR420W	URA4	1000	1022	FALSE	334	341	IPQVISDG	IF*VISDG	P335F	Q336*	NA	coding	stop	c(-10.451, NA)	10.451
ATCCCTCCAATTGGCCCAGA	neStops	-	chrV	154427	154449	YER001W	MNN1	908	930	FALSE	303	310	TFWANWRD	TFWAN*KD	W308*	R309K	NA	coding	stop	c(NA, 0.033)	0.033
ATCCTTACAATTGTTATCTT	neStops	-	chrXIII	829748	829770	YMR280C	CAT8	1560	1582	FALSE	520	528	PSLQLLSLA	PSL*LLSLA	Q523*	NA	NA	coding	stop	NA	NA
ATCGAACAGGCAAGATTGAT	neStops	-	chrXVI	234382	234404	YPL167C	REV3	2704	2726	FALSE	902	909	IEQARLIG	IE*ARLIG	Q904*	NA	NA	coding	stop	NA	NA
ATCGACCAACCTACTGGTAC	neStops	-	chrVII	114231	114253	YGL203C	KEX1	412	434	FALSE	138	145	IDQPTGTG	ID*PTGTG	Q140*	NA	NA	coding	stop	NA	NA
ATCGATCAATCGGCCATCAC	neStops	+	chrXVI	483602	483624	YPL036W	PMA2	760	782	FALSE	254	261	IDQSAITG	ID*SAITG	Q256*	NA	NA	coding	stop	NA	NA
ATCGATTCAGAACTTTATAG	neStops	+	chrXV	879016	879038	YOR299W	BUD7	582	604	FALSE	194	202	GSIQNFIVD	GSI*NFIVD	Q197*	NA	NA	coding	stop	NA	NA
ATCGCAAAACGAGGAGTTCA	neStops	+	chrVIII	322558	322580	YHR103W	SBE22	2145	2167	FALSE	715	723	LSQNEEFKD	LS*NEEFKD	Q717*	NA	NA	coding	stop	NA	NA
ATCGCAACCTGAAATAAAGA	neStops	+	chrVIII	474234	474256	YHR184W	SSP1	1491	1513	FALSE	497	505	ISQPEIKKE	IS*SEIKKE	Q499*	P500S	NA	coding	stop	c(NA, -0.458)	0.458
ATCGCAAGGCGAATATAAAG	neStops	-	chrV	125648	125670	YEL016C	NPP2	549	571	FALSE	183	191	ESQGEYKVA	ES*GEYKVA	Q185*	NA	NA	coding	stop	NA	NA
ATCGCAATATAACATAAACG	neStops	-	chrIV	97107	97129	YDL203C	ACK1	825	847	FALSE	275	283	ISQYNINAE	IS*YNINAE	Q277*	NA	NA	coding	stop	NA	NA
ATCGCAGGAGGAGAATAGAG	neStops	-	chrVIII	395456	395478	YHR149C	SKG6	1182	1204	FALSE	394	402	ISQEENRVD	IS*EENRVD	Q396*	NA	NA	coding	stop	NA	NA
ATCGCGAAACCGCAATAAGA	neStops	+	chrV	542928	542950	YER176W	ECM32	1239	1261	FALSE	413	421	KSRNRNKKA	KS*NRNKKA	R415*	NA	NA	coding	stop	NA	NA
ATCGGTCAGATATGTCTATT	neStops	+	chrXIII	800468	800490	YMR266W	RSN1	1951	1973	FALSE	651	658	IGQICLLG	IG*ICLLG	Q653*	NA	NA	coding	stop	NA	NA
ATCGTACCAATCGCTTTCTG	neStops	-	chrXI	522643	522665	YKR044W	UIP5	629	651	FALSE	210	217	APESDWYD	APESD*YD	W215*	NA	NA	coding	stop	NA	NA
ATCGTACCAGACATACAATC	neStops	-	chrIX	96042	96064	YIL135C	VHS2	312	334	FALSE	104	112	ASYQTYNPD	ASY*TYNPD	Q107*	NA	NA	coding	stop	NA	NA
ATCGTCAAACCAATCCTAAT	neStops	-	chrV	373769	373791	YER107C	GLE2	755	777	FALSE	252	259	HRQTNPNR	HR*TNPNR	Q254*	NA	NA	coding	stop	NA	NA
ATCGTCCAAAAAATGTATGG	neStops	+	chrII	413661	413683	YBR084W	MIS1	2608	2630	FALSE	870	877	IVQKMYGG	IV*KMYGG	Q872*	NA	NA	coding	stop	NA	NA
ATCGTCCAAAAGTCTTCTAC	neStops	+	chrXII	700027	700049	YLR278C	YLR278C	3976	3998	FALSE	1326	1333	PVEDFWTI	PVEDF*TI	W1331*	NA	NA	coding	stop	NA	NA
ATCGTGCAACAAGCATTTGA	neStops	+	chrXIII	264176	264198	YML003W	YML003W	694	716	FALSE	232	239	IVQQAFDG	IV*QAFDG	Q234*	NA	NA	coding	stop	NA	NA
ATCGTTCAAAAGATGTACGG	neStops	+	chrVII	908454	908476	YGR204W	ADE3	2521	2543	FALSE	841	848	IVQKMYGG	IV*KMYGG	Q843*	NA	NA	coding	stop	NA	NA
ATCTAAGCAATTGAAGACCA	neStops	+	chrXII	441057	441079	YLR150W	STM1	591	613	FALSE	197	205	KSKQLKTKE	KSK*LKTKE	Q200*	NA	NA	coding	stop	NA	NA
ATCTACAAGATGGTACTGGA	neStops	+	chrXV	1026503	1026525	YOR367W	SCP1	497	519	FALSE	166	173	HLQDGTGW	HL*DGTGW	Q168*	NA	NA	coding	stop	NA	NA
ATCTACCAAATTGATTACTA	neStops	+	chrVIII	508395	508417	YHR204W	MNL1	2077	2099	FALSE	693	700	IYQIDYYG	IY*IDYYG	Q695*	NA	NA	coding	stop	NA	NA
ATCTACCAAGGACAAGAATT	neStops	-	chrX	24918	24940	YJL216C	IMA5	1147	1169	FALSE	383	390	IYQGQELG	IY*GQELG	Q385*	NA	NA	coding	stop	NA	NA
ATCTCAAAAGGCTAGGGAAG	neStops	+	chrIX	93849	93871	YIL136W	OM45	231	253	FALSE	77	85	VSQKAREEA	VS*KAREEA	Q79*	NA	NA	coding	stop	NA	NA
ATCTCAAACAATTTGGGCAG	neStops	+	chrIV	1312999	1313021	YDR421W	ARO80	960	982	FALSE	320	328	ISQTIWAEA	IS*TIWAEA	Q322*	NA	NA	coding	stop	NA	NA
ATCTCAAGCATTGAAAATAG	neStops	-	chrV	119504	119526	YEL020C	PXP1	774	796	FALSE	258	266	RSQALKIAD	RS*ALKIAD	Q260*	NA	NA	coding	stop	NA	NA
ATCTCAAGTGGTATTAATAC	neStops	+	chrVIII	139014	139036	YHR017W	YSC83	321	343	FALSE	107	115	ESQVVLILG	ES*VVLILG	Q109*	NA	NA	coding	stop	NA	NA
ATCTCAATCTACCACAAACA	neStops	-	chrXVI	652906	652928	YPR042C	PUF2	735	757	FALSE	245	253	QSQSTTNRV	QS*STTNRV	Q247*	NA	NA	coding	stop	NA	NA
ATCTCAATTACTTATGCAGT	neStops	+	chrIV	455593	455615	YDR004W	RAD57	393	415	FALSE	131	139	KSQLLMQLA	KS*LLMQLA	Q133*	NA	NA	coding	stop	NA	NA
ATCTCAGAATATGCCTAAAG	neStops	-	chrIV	58833	58855	YDL223C	HBT1	1551	1573	FALSE	517	525	GSQNMPKAG	GS*NMPKAG	Q519*	NA	NA	coding	stop	NA	NA
ATCTCAGCAAGAACTACAGC	neStops	-	chrXIV	339194	339216	YNL159C	ASI2	132	154	FALSE	44	52	QSQQELQQD	QS**ELQQD	Q46*	Q47*	NA	coding	stop	c(NA, NA)	NA
ATCTCCAATGGTAAGATAAC	neStops	+	chrX	124105	124127	YJL157C	FAR1	2202	2224	FALSE	734	742	DQLSYHWRY	DQLSYH*RY	W740*	NA	NA	coding	stop	NA	NA
ATCTCCATCCTTTCTCGTCA	neStops	-	chrXI	582501	582523	YKR076W	ECM4	219	241	FALSE	73	81	HLDEKGWRF	HLDEKG*RF	W79*	NA	NA	coding	stop	NA	NA
ATCTCTCCATGCGTCGTAAT	neStops	-	chrXII	178365	178387	YLR017W	MEU1	758	780	FALSE	253	260	TDYDAWRD	TDYDA*KD	W258*	R259K	NA	coding	stop	c(NA, -1.157)	1.157
ATCTGATCCAGTCCCTATCC	neStops	-	chrXIV	188299	188321	YNL243W	SLA2	249	271	FALSE	83	91	IRDRDWIRS	IRDRD*IRS	W88*	NA	NA	coding	stop	NA	NA
ATCTGCCACGATGCACTATC	neStops	-	chrXII	82694	82716	YLL029W	FRA1	1234	1256	FALSE	412	419	PDSASWQM	PDSAS*QM	W417*	NA	NA	coding	stop	NA	NA
ATCTGCCCAACTACAATTTA	neStops	+	chrXIII	194095	194117	YML042W	CAT2	1308	1330	FALSE	436	444	ESAQLQFKE	ESV*LQFKE	A438V	Q439*	NA	coding	stop	c(-3.93, NA)	3.93
ATCTTACAAGCCGATGATGA	neStops	+	chrVII	691595	691617	YGR100W	MDR1	1351	1373	FALSE	451	458	ILQADDDG	IL*ADDDG	Q453*	NA	NA	coding	stop	NA	NA
ATCTTACAGAAGCAATTGAC	neStops	+	chrXV	195063	195085	YOL072W	THP1	94	116	FALSE	32	39	ILQKQLTG	IL*KQLTG	Q34*	NA	NA	coding	stop	NA	NA
ATCTTCAGAGACGTGTGGAA	neStops	+	chrXII	530143	530165	YLR188W	MDL1	1844	1866	FALSE	615	622	NLQRRVER	NL*RRVER	Q617*	NA	NA	coding	stop	NA	NA
ATCTTCAGTCACAAGGTAAA	neStops	-	chrXVI	824723	824745	YPR145C-A	YPR145C-A	182	204	FALSE	61	68	NLQSQGKR	NL*SQGKR	Q63*	NA	NA	coding	stop	NA	NA
ATCTTCCAAGTTGAAAAGTG	neStops	-	chrX	87668	87690	YJL180C	ATP12	871	893	FALSE	291	298	IFQVEKWG	IF*VEKWG	Q293*	NA	NA	coding	stop	NA	NA
ATCTTCCCAAGTTAAGGCTA	neStops	-	chrXIV	518137	518159	YNL055C	POR1	687	709	FALSE	229	237	ASSQVKAKV	ASF*VKAKV	S231F	Q232*	NA	coding	stop	c(-4.892, NA)	4.892
ATCTTCGCAAAAGGGAACAG	neStops	-	chrVII	113725	113747	YGL203C	KEX1	918	940	FALSE	306	314	ESSQKGTAD	ESL*KGTAD	S308L	Q309*	NA	coding	stop	c(-2.945, NA)	2.945
ATCTTCTCAACTTGTGTTGC	neStops	+	chrXI	252900	252922	YKL101W	HSL1	3981	4003	FALSE	1327	1335	ESSQLVLPV	ESF*LVLPV	S1329F	Q1330*	NA	coding	stop	c(-0.989, NA)	0.989
ATCTTCTCAGCATGTGGACT	neStops	-	chrXIV	105618	105640	YNL283C	WSC2	1056	1078	FALSE	352	360	QSSQHVDLE	QSF*HVDLE	S354F	Q355*	NA	coding	stop	c(-2.181, NA)	2.181
ATCTTGCCATTCGCTGGAAG	neStops	+	chrXIII	673495	673517	YMR205C	PFK2	1250	1272	FALSE	417	424	ATSSEWQD	ATSSE*QD	W422*	NA	NA	coding	stop	NA	NA
ATCTTTCCAACTCAGTACTA	neStops	-	chrVII	758113	758135	YGR134W	CAF130	344	366	FALSE	115	122	SIVLSWKD	SIVLS*KD	W120*	NA	NA	coding	stop	NA	NA
ATGAAACCCAAGATACGTAT	neStops	-	chrXII	733480	733502	YLR303W	MET17	939	961	FALSE	313	321	SPYVSWVSY	SPYVS*ISY	W318*	V319I	NA	coding	stop	c(NA, -0.994)	0.994
ATGAACAAAACCTTAAAAAA	neStops	+	chrXV	368215	368237	YOR019W	YOR019W	89	111	FALSE	30	37	NEQNLKKR	NE*NLKKR	Q32*	NA	NA	coding	stop	NA	NA
ATGAACAAAGCACCACACAG	neStops	+	chrXV	298123	298145	YOL015W	IRC10	1046	1068	FALSE	349	356	NEQSTTQR	NE*STTQR	Q351*	NA	NA	coding	stop	NA	NA
ATGAACACCAGGTTACATGT	neStops	-	chrXV	289365	289387	YOL019W	YOL019W	468	490	FALSE	156	164	YPHVTWCSW	YPHVT*YSW	W161*	C162Y	NA	coding	stop	c(NA, -6.767)	6.767
ATGAACAGCAGCCAAGAAAT	neStops	-	chrIV	792393	792415	YDR169C	STB3	1475	1497	FALSE	492	499	HEQQPRNG	HE*QPRNG	Q494*	NA	NA	coding	stop	NA	NA
ATGAACAGGACGAGGACAAA	neStops	-	chrIV	51127	51149	YDL226C	GCS1	1025	1047	FALSE	342	349	NEQDEDKW	NE*DEDKW	Q344*	NA	NA	coding	stop	NA	NA
ATGAAGCCAAGAATTGTCCC	neStops	+	chrX	348512	348534	YJL048C	UBX6	104	126	FALSE	35	42	AGDNSWLH	AGDNS*LH	W40*	NA	NA	coding	stop	NA	NA
ATGAATCAAATCTGGTCTAC	neStops	-	chrIV	1224372	1224394	YDR374C	PHO92	1	23	FALSE	1	8	MNQIWSTG	MN*IWSTG	Q3*	NA	NA	coding	stop	NA	NA
ATGACCAAGACGAAGTTAAA	neStops	+	chrXIV	337173	337195	YNL160W	YGP1	629	651	FALSE	210	217	DDQDEVKW	DD*DEVKW	Q212*	NA	NA	coding	stop	NA	NA
ATGACCAAGAGGAATATACC	neStops	+	chrIV	1264414	1264436	YDR395W	SXM1	1091	1113	FALSE	364	371	DDQEEYTR	DD*EEYTR	Q366*	NA	NA	coding	stop	NA	NA
ATGACCAATATCTATTTGAA	neStops	+	chrVIII	254440	254462	YHR077C	NMD2	1182	1204	FALSE	394	402	DLSNRYWSS	DLSNRY*SS	W400*	NA	NA	coding	stop	NA	NA
ATGACCAATTGTTACTTTCA	neStops	+	chrIV	1503502	1503524	YDR534C	FIT1	1377	1399	FALSE	459	467	THESNNWSS	THESNN*SS	W465*	NA	NA	coding	stop	NA	NA
ATGACCAGGATGCCTATTGG	neStops	-	chrI	167981	168003	YAR014C	BUD14	869	891	FALSE	290	297	NDQDAYWW	ND*DAYWW	Q292*	NA	NA	coding	stop	NA	NA
ATGAGACCATGAACCTAGTC	neStops	-	chrXIII	415249	415271	YMR075W	RCO1	1268	1290	FALSE	423	430	TRLGSWSH	TRLGS*SH	W428*	NA	NA	coding	stop	NA	NA
ATGAGCAGACAAGAGTTATT	neStops	+	chrXIV	614867	614889	YNL009W	IDP3	47	69	FALSE	16	23	DEQTRVIW	DE*TRVIW	Q18*	NA	NA	coding	stop	NA	NA
ATGAGCAGATCTATAACAGG	neStops	+	chrXI	470996	471018	YKR016W	MIC60	1280	1302	FALSE	427	434	NEQIYNRW	NE*IYNRW	Q429*	NA	NA	coding	stop	NA	NA
ATGAGCAGTTCAGTGGTTAC	neStops	-	chrIV	1327676	1327698	YDR430C	CYM1	773	795	FALSE	258	265	NEQFSGYG	NE*FSGYG	Q260*	NA	NA	coding	stop	NA	NA
ATGATACAACCACCTCAGCA	neStops	-	chrII	44596	44618	YBL093C	ROX3	301	323	FALSE	101	108	MIQPPQQG	MI*PPQQG	Q103*	NA	NA	coding	stop	NA	NA
ATGATCAAGTTAAAATTCGT	neStops	-	chrII	471809	471831	YBR115C	LYS2	2096	2118	FALSE	699	706	DDQVKIRG	DD*VKIRG	Q701*	NA	NA	coding	stop	NA	NA
ATGATCAAGTTATTGCTTTG	neStops	+	chrXIII	703186	703208	YMR217W	GUA1	1397	1419	FALSE	466	473	YDQVIALR	YD*VIALR	Q468*	NA	NA	coding	stop	NA	NA
ATGATCAGAACGATTTGGTC	neStops	+	chrXV	717630	717652	YOR197W	MCA1	545	567	FALSE	182	189	DDQNDLVR	DD*NDLVR	Q184*	NA	NA	coding	stop	NA	NA
ATGATCAGCAAGCAAAGGAT	neStops	-	chrXV	86590	86612	YOL124C	TRM11	146	168	FALSE	49	56	NDQQAKDW	ND*QAKDW	Q51*	NA	NA	coding	stop	NA	NA
ATGATCGAATGGAACCTCGT	neStops	+	chrIII	81254	81276	YCL024W	KCC4	2093	2115	FALSE	698	705	NDRMEPRR	ND*MEPRR	R700*	NA	NA	coding	stop	NA	NA
ATGATCGAGTACTGATCTTG	neStops	+	chrXVI	366369	366391	YPL097W	MSY1	1418	1440	FALSE	473	480	DDRVLILR	DD*VLILR	R475*	NA	NA	coding	stop	NA	NA
ATGATGCAAATATTTGACTT	neStops	+	chrXII	1051165	1051187	YLR454W	FMP27	7168	7190	FALSE	2390	2397	MMQIFDLG	MM*IFDLG	Q2392*	NA	NA	coding	stop	NA	NA
ATGATTCAATCTGCGGATGT	neStops	+	chrV	516152	516174	YER166W	DNF1	3409	3431	FALSE	1137	1144	MIQSADVG	MI*SADVG	Q1139*	NA	NA	coding	stop	NA	NA
ATGCAAAAGGAAGGCGCCGC	neStops	-	chrXII	54743	54765	YLL040C	VPS13	8881	8903	FALSE	2961	2968	MQKEGAAG	M*KEGAAG	Q2962*	NA	NA	coding	stop	NA	NA
ATGCAAATAAATGATGCCAA	neStops	-	chrXII	172713	172735	YLR014C	PPR1	2248	2270	FALSE	750	757	MQINDAKG	M*INDAKG	Q751*	NA	NA	coding	stop	NA	NA
ATGCAACATCCTGATTGGGA	neStops	-	chrXIII	428690	428712	YMR080C	NAM7	916	938	FALSE	306	313	MQHPDWEG	M*YPDWEG	Q307*	H308Y	NA	coding	stop	c(NA, -2.788)	2.788
ATGCAACGCATCAAAAGAAT	neStops	+	chrXVI	36940	36962	YPL268W	PLC1	1705	1727	FALSE	569	576	MQRIKRIG	M*CIKRIG	Q570*	R571C	NA	coding	stop	c(NA, -3.856)	3.856
ATGCAAGAAGCGGTTGATGA	neStops	+	chrX	611585	611607	YJR096W	YJR096W	391	413	FALSE	131	138	MQEAVDEG	M*EAVDEG	Q132*	NA	NA	coding	stop	NA	NA
ATGCAAGAATGCACAATTAA	neStops	-	chrV	240138	240160	YER045C	ACA1	1342	1364	FALSE	448	455	MQECTING	M*ECTING	Q449*	NA	NA	coding	stop	NA	NA
ATGCAAGAGTTGCCAAAGAC	neStops	+	chrIV	1214363	1214385	YDR368W	YPR1	460	482	FALSE	154	161	MQELPKTG	M*ELPKTG	Q155*	NA	NA	coding	stop	NA	NA
ATGCAAGCCATAAGGAAACG	neStops	-	chrXIV	136268	136290	YNL270C	ALP1	1372	1394	FALSE	458	465	MQAIRKRG	M*VIRKRG	Q459*	A460V	NA	coding	stop	c(NA, -1.731)	1.731
ATGCAAGCTTTAAAGCACCG	neStops	+	chrXIV	140038	140060	YNL268W	LYP1	1489	1511	FALSE	497	504	MQALKHRG	M*VLKHRG	Q498*	A499V	NA	coding	stop	c(NA, -1.765)	1.765
ATGCAAGGTTTCGATTTCGA	neStops	+	chrXIII	172764	172786	YML051W	GAL80	1171	1193	FALSE	391	398	MQGFDFEG	M*GFDFEG	Q392*	NA	NA	coding	stop	NA	NA
ATGCAAGTCATCGGACGTGG	neStops	-	chrIV	1093564	1093586	YDR315C	IPK1	1	23	FALSE	1	8	MQVIGRGG	M*VIGRGG	Q2*	NA	NA	coding	stop	NA	NA
ATGCAATTTGAAGTCAGTCA	neStops	+	chrVI	40544	40566	YFL047W	RGD2	124	146	FALSE	42	49	MQFEVSHG	M*FEVSHG	Q43*	NA	NA	coding	stop	NA	NA
ATGCACGAACTCTTGTTGAC	neStops	+	chrXI	204352	204374	YKL127W	PGM1	812	834	FALSE	271	278	YARTLVDR	YV*TLVDR	A272V	R273*	NA	coding	stop	c(-3.999, NA)	3.999
ATGCAGAAGAAGGCAAGTGG	neStops	+	chrXII	988443	988465	YLR427W	MAG2	16	38	FALSE	6	13	MQKKASGG	M*KKASGG	Q7*	NA	NA	coding	stop	NA	NA
ATGCAGACTTTAAGGCACGT	neStops	+	chrXI	615931	615953	YKR093W	PTR2	202	224	FALSE	68	75	MQTLRHVG	M*ILRHVG	Q69*	T70I	NA	coding	stop	c(NA, -5.601)	5.601
ATGCAGAGAGTTGAACAAGC	neStops	+	chrIV	440434	440456	YDL006W	PTC1	526	548	FALSE	176	183	MQRVEQAG	M*RVEQAG	Q177*	NA	NA	coding	stop	NA	NA
ATGCAGGCTAGATTCAAGTA	neStops	+	chrXIV	383028	383050	YNL128W	TEP1	670	692	FALSE	224	231	MQARFKYG	M*VRFKYG	Q225*	A226V	NA	coding	stop	c(NA, -1.726)	1.726
ATGCAGTGGCTGTCCTGTAT	neStops	+	chrXIII	725067	725089	YMR228W	MTF1	442	464	FALSE	148	155	MQWLSCIG	M*WLSCIG	Q149*	NA	NA	coding	stop	NA	NA
ATGCCAATCGGACTTCATGT	neStops	-	chrII	739911	739933	YBR267W	REI1	71	93	FALSE	24	31	AHMKSDWH	AHMKSD*H	W30*	NA	NA	coding	stop	NA	NA
ATGCCAATCGTACCAGTAGT	neStops	+	chrIII	248375	248397	YCR075C	ERS1	419	441	FALSE	140	147	SNYWYDWH	SNYWYD*H	W146*	NA	NA	coding	stop	NA	NA
ATGCCAGGGGTGCATAAGTT	neStops	-	chrXII	676758	676780	YLR266C	PDR8	945	967	FALSE	315	323	LCQGCISLG	LC*GCISLG	Q317*	NA	NA	coding	stop	NA	NA
ATGCCAGTTTAGATACGCCA	neStops	+	chrXIII	167087	167109	YML054C	CYB2	200	222	FALSE	67	74	SVAYLNWH	SVAYLN*H	W73*	NA	NA	coding	stop	NA	NA
ATGCCATGGCTCCAAGAAAA	neStops	+	chrIX	239794	239816	YIL066C	RNR3	893	915	FALSE	298	305	ALFLEPWH	ALFLEP*H	W304*	NA	NA	coding	stop	NA	NA
ATGCCATTCCCCCATGTAAT	neStops	-	chrI	38551	38573	YAL058W	CNE1	1088	1110	FALSE	363	370	PNYMGEWH	PNYMGE*H	W369*	NA	NA	coding	stop	NA	NA
ATGCCCAACCTGAAGTAGAT	neStops	-	chrXV	845061	845083	YOR280C	FSH3	710	732	FALSE	237	244	NAQPEVDR	NV*PEVDR	A238V	Q239*	NA	coding	stop	c(-0.565, NA)	0.565
ATGCCCCAGAATAACACCTT	neStops	-	chrXIV	322937	322959	YNL166C	BNI5	607	629	FALSE	203	210	MPQNNTLG	MF*NNTLG	P204F	Q205*	NA	coding	stop	c(-2.147, NA)	2.147
ATGCCTCGAGAAACAGCCGC	neStops	+	chrXV	290161	290183	YOL019W	YOL019W	1264	1286	FALSE	422	429	MPRETAAG	MF*ETAAG	P423F	R424*	NA	coding	stop	c(-3.727, NA)	3.727
ATGCGAAGACCTCGTGGTGA	neStops	-	chrVII	52897	52919	YGL237C	HAP2	610	632	FALSE	204	211	MRRPRGEG	M*RPRGEG	R205*	NA	NA	coding	stop	NA	NA
ATGCGAGAACATATCCCACT	neStops	+	chrXV	229316	229338	YOL054W	PSH1	703	725	FALSE	235	242	MREHIPLG	M*EHIPLG	R236*	NA	NA	coding	stop	NA	NA
ATGCGATTGACCATAGGATT	neStops	+	chrVIII	460565	460587	YHR178W	STB5	1267	1289	FALSE	423	430	MRLTIGLG	M*LTIGLG	R424*	NA	NA	coding	stop	NA	NA
ATGCTCAGGATCGCTATTTA	neStops	+	chrXV	871532	871554	YOR296W	YOR296W	1331	1353	FALSE	444	451	NAQDRYLW	NV*DRYLW	A445V	Q446*	NA	coding	stop	c(-0.723, NA)	0.723
ATGCTTACGATGTATCAGCA	neStops	-	chrII	699757	699779	YBR239C	ERT1	165	187	FALSE	55	63	PCLRCISKG	PCL*CISKG	R58*	NA	NA	coding	stop	NA	NA
ATGGAACAATACTGCATTGT	neStops	+	chrXIII	532236	532258	YMR130W	YMR130W	118	140	FALSE	40	47	MEQYCIVG	ME*YCIVG	Q42*	NA	NA	coding	stop	NA	NA
ATGGACAAGTGCACGTTGGC	neStops	+	chrIV	806748	806770	YDR171W	HSP42	128	150	FALSE	43	50	YGQVHVGG	YG*VHVGG	Q45*	NA	NA	coding	stop	NA	NA
ATGGACTCAGCGTCTGGCAA	neStops	-	chrXV	19790	19812	YOL158C	ENB1	1500	1522	FALSE	500	508	IWTQRLAKE	IWI*RLAKE	T502I	Q503*	NA	coding	stop	c(-5.324, NA)	5.324
ATGGAGCAATTGTACAAATC	neStops	+	chrIV	240682	240704	YDL124W	YDL124W	424	446	FALSE	142	149	MEQLYKSG	ME*LYKSG	Q144*	NA	NA	coding	stop	NA	NA
ATGGCAAACAATGTTATCTA	neStops	-	chrXIV	684248	684270	YNR031C	SSK2	1164	1186	FALSE	388	396	EWQTMLSKV	EW*TMLSKV	Q390*	NA	NA	coding	stop	NA	NA
ATGGCAAGCCACCCTAGATG	neStops	+	chrVIII	206644	206666	YHR049W	FSH1	183	205	FALSE	61	69	KWQATLDAD	KW*ATLDAD	Q63*	NA	NA	coding	stop	NA	NA
ATGGCCAGCTCGCTAATTAC	neStops	-	chrII	61937	61959	YBL086C	YBL086C	644	666	FALSE	215	222	NGQLANYR	NG*LANYR	Q217*	NA	NA	coding	stop	NA	NA
ATGGGAACAGTTGTCGCAAT	neStops	+	chrX	563726	563748	YJR066W	TOR1	4311	4333	FALSE	1437	1445	EWEQLSQLA	EWE*LSQLA	Q1440*	NA	NA	coding	stop	NA	NA
ATGGGACAAATGGCTGCAGC	neStops	-	chrXV	513836	513858	YOR100C	CRC1	421	443	FALSE	141	148	MGQMAAAG	MG*MAAAG	Q143*	NA	NA	coding	stop	NA	NA
ATGGGCCAATCTCCGTATAG	neStops	-	chrVII	917568	917590	YGR212W	SLI1	529	551	FALSE	177	184	PLYGDWPI	PLYGD*PI	W182*	NA	NA	coding	stop	NA	NA
ATGGGCCAGAACTTAAACTT	neStops	+	chrXIII	302244	302266	YMR015C	ERG5	220	242	FALSE	74	81	PKFKFWPI	PKFKF*PI	W79*	NA	NA	coding	stop	NA	NA
ATGGGTCAAGCTCCGATTAG	neStops	+	chrIV	454323	454345	YDR003W	RCR2	202	224	FALSE	68	75	MGQAPIRG	MG*APIRG	Q70*	NA	NA	coding	stop	NA	NA
ATGGGTTCAGGAAGCTCTCG	neStops	-	chrII	599506	599528	YBR185C	MBA1	432	454	FALSE	144	152	LWVQEALEA	LWV*EALEA	Q147*	NA	NA	coding	stop	NA	NA
ATGGTACAAAGGCTTCTACC	neStops	+	chrXVI	556377	556399	YPR001W	CIT3	1	23	FALSE	1	8	MVQRLLPG	MV*RLLPG	Q3*	NA	NA	coding	stop	NA	NA
ATGGTACAAGAATCACGTCC	neStops	+	chrXII	408445	408467	YLR133W	CKI1	1	23	FALSE	1	8	MVQESRPG	MV*ESRPG	Q3*	NA	NA	coding	stop	NA	NA
ATGGTACAGTCCATAAAGGA	neStops	+	chrII	77953	77975	YBL079W	NUP170	2695	2717	FALSE	899	906	MVQSIKEG	MV*SIKEG	Q901*	NA	NA	coding	stop	NA	NA
ATGGTCAATTAATTCAATTA	neStops	+	chrIV	1424144	1424166	YDR484W	VPS52	1382	1404	FALSE	461	468	NGQLIQLW	NG*LIQLW	Q463*	NA	NA	coding	stop	NA	NA
ATGGTCGAGTTACAGGATTA	neStops	+	chrVII	776601	776623	YGR143W	SKN1	1409	1431	FALSE	470	477	YGRVTGLW	YG*VTGLW	R472*	NA	NA	coding	stop	NA	NA
ATGTACCAACCACCCCACAG	neStops	+	chrIX	266487	266509	YIL047C	SYG1	1315	1337	FALSE	439	446	PLWGGWYM	PLWGG*YM	W444*	NA	NA	coding	stop	NA	NA
ATGTCAACAAAATGAAAATC	neStops	+	chrXIV	768293	768315	YNR070W	PDR18	2919	2941	FALSE	973	981	KCQQNENPA	KC**NENPA	Q975*	Q976*	NA	coding	stop	c(NA, NA)	NA
ATGTCACAAACTGCAAATAG	neStops	+	chrVII	1055371	1055393	YGR281W	YOR1	2548	2570	FALSE	850	857	MSQTANSG	ML*TANSG	S851L	Q852*	NA	coding	stop	c(-2.331, NA)	2.331
ATGTCACAATGGTACATAGG	neStops	-	chrII	580675	580697	YBR172C	SMY2	676	698	FALSE	226	233	MSQWYIGG	ML*WYIGG	S227L	Q228*	NA	coding	stop	c(-3.795, NA)	3.795
ATGTCACAGTGGTATCAAGG	neStops	-	chrXVI	354883	354905	YPL105C	SYH1	508	530	FALSE	170	177	MSQWYQGG	ML*WYQGG	S171L	Q172*	NA	coding	stop	c(-3.683, NA)	3.683
ATGTCAGCATCCATCGTTGA	neStops	+	chrXII	643256	643278	YLR253W	MCP2	630	652	FALSE	210	218	KCQHPSLKE	KC*YPSLKE	Q212*	H213Y	NA	coding	stop	c(NA, -6)	6
ATGTCCATTTATAACTTTGA	neStops	-	chrVIII	205272	205294	YHR048W	YHK8	666	688	FALSE	222	230	YHQSYKWTF	YHQSYK*TF	W228*	NA	NA	coding	stop	NA	NA
ATGTCCGAGAATTTAATACT	neStops	-	chrVII	521174	521196	YGR015C	YGR015C	881	903	FALSE	294	301	DVREFNTG	DV*EFNTG	R296*	NA	NA	coding	stop	NA	NA
ATGTGCAAGCCTTATTGCAC	neStops	+	chrXVI	618668	618690	YPR026W	ATH1	3290	3312	FALSE	1097	1104	DVQALLHW	DV*ALLHW	Q1099*	NA	NA	coding	stop	NA	NA
ATGTGGCAAAAGCCTGAACC	neStops	-	chrIX	235734	235756	YIL067C	YIL067C	2005	2027	FALSE	669	676	MWQKPEPG	MW*KPEPG	Q671*	NA	NA	coding	stop	NA	NA
ATGTGTACGACTGGGAGATG	neStops	+	chrXI	562657	562679	YKR064W	OAF3	111	133	FALSE	37	45	TCVRLGDVD	TCV*LGDVD	R40*	NA	NA	coding	stop	NA	NA
ATGTTCCAAGCGCTTCGGGT	neStops	+	chrXII	1037074	1037096	YLR451W	LEU3	982	1004	FALSE	328	335	MFQALRVG	MF*ALRVG	Q330*	NA	NA	coding	stop	NA	NA
ATGTTCCAATTGGTAAAGAG	neStops	-	chrXV	802941	802963	YOR251C	TUM1	502	524	FALSE	168	175	MFQLVKSG	MF*LVKSG	Q170*	NA	NA	coding	stop	NA	NA
ATTAAACAGCTTATGGATCT	neStops	+	chrV	457501	457523	YER143W	DDI1	1183	1205	FALSE	395	402	IKQLMDLG	IK*LMDLG	Q397*	NA	NA	coding	stop	NA	NA
ATTAACCCACTGTCTTGATT	neStops	-	chrXIII	294702	294724	YMR012W	CLU1	3569	3591	FALSE	1190	1197	AQSRQWVN	AQSRQ*IN	W1195*	V1196I	NA	coding	stop	c(NA, -0.383)	0.383
ATTAAGCAGCTTCAGACTCC	neStops	-	chrXIII	79470	79492	YML097C	VPS9	199	221	FALSE	67	74	IKQLQTPG	IK*LQTPG	Q69*	NA	NA	coding	stop	NA	NA
ATTAAGCGACGTGAATCCGA	neStops	+	chrXIII	516457	516479	YMR124W	EPO1	2002	2024	FALSE	668	675	IKRRESDG	IK*RESDG	R670*	NA	NA	coding	stop	NA	NA
ATTAAGTCAGTTCGGTATCA	neStops	-	chrXIII	63010	63032	YML103C	NUP188	4518	4540	FALSE	1506	1514	LLSQFGIKV	LLS*FGIKV	Q1509*	NA	NA	coding	stop	NA	NA
ATTACAAAAACTATTGGAGC	neStops	-	chrIV	1427096	1427118	YDR485C	VPS72	90	112	FALSE	30	38	KLQKLLEQE	KL*KLLEQE	Q32*	NA	NA	coding	stop	NA	NA
ATTACAAAATTTAAAAGGCA	neStops	-	chrX	219074	219096	YJL107C	YJL107C	921	943	FALSE	307	315	RLQNLKGKA	RL*NLKGKA	Q309*	NA	NA	coding	stop	NA	NA
ATTACAAAGAAACGAAATCT	neStops	+	chrVII	86756	86778	YGL216W	KIP3	1872	1894	FALSE	624	632	ELQRNEILV	EL*RNEILV	Q626*	NA	NA	coding	stop	NA	NA
ATTACAAAGAATGAGGCTTA	neStops	-	chrX	593682	593704	YJR090C	GRR1	624	646	FALSE	208	216	KLQRMRLRA	KL*RMRLRA	Q210*	NA	NA	coding	stop	NA	NA
ATTACAAATACTTACAATAT	neStops	-	chrXII	227708	227730	YLR039C	RIC1	867	889	FALSE	289	297	GLQILTISD	GL*ILTISD	Q291*	NA	NA	coding	stop	NA	NA
ATTACAGAGGAAGAGAAGCA	neStops	-	chrVII	1038471	1038493	YGR271C-A	EFG1	9	31	FALSE	3	11	KLQRKRSKA	KL*RKRSKA	Q5*	NA	NA	coding	stop	NA	NA
ATTACAGGAAACATTGAAAC	neStops	+	chrIV	1250521	1250543	YDR388W	RVS167	336	358	FALSE	112	120	ELQETLKPD	EL*ETLKPD	Q114*	NA	NA	coding	stop	NA	NA
ATTACCACAAGGTGTCGGTT	neStops	-	chrIII	75195	75217	YCL026C-A	FRM2	69	91	FALSE	23	31	ELPQGVGLD	ELL*GVGLD	P25L	Q26*	NA	coding	stop	c(-9.641, NA)	9.641
ATTACCAGTTCATCTGGAGA	neStops	+	chrII	596929	596951	YBR183W	YPC1	815	837	FALSE	272	279	NYQFIWRW	NY*FIWRW	Q274*	NA	NA	coding	stop	NA	NA
ATTACTCCAAATGAATTCTT	neStops	-	chrII	712282	712304	YBR246W	RRT2	692	714	FALSE	231	238	SKEFIWSN	SKEFI*NN	W236*	S237N	NA	coding	stop	c(NA, -1.957)	1.957
ATTAGAACAAGACGAATTAT	neStops	+	chrXV	408928	408950	YOR042W	CUE5	504	526	FALSE	168	176	QLEQDELLA	QLE*DELLA	Q171*	NA	NA	coding	stop	NA	NA
ATTAGAACAAGCTGAGAAGA	neStops	-	chrXV	737237	737259	YOR209C	NPT1	468	490	FALSE	156	164	QLEQAEKKA	QLE*AEKKA	Q159*	NA	NA	coding	stop	NA	NA
ATTAGCCAATATATGGGCAG	neStops	+	chrXIV	705778	705800	YNR044W	AGA1	2080	2102	FALSE	694	701	ISQYMGSG	IS*YMGSG	Q696*	NA	NA	coding	stop	NA	NA
ATTAGGCAATATCCCCTACT	neStops	-	chrIV	294026	294048	YDL091C	UBX3	712	734	FALSE	238	245	IRQYPLLG	IR*YPLLG	Q240*	NA	NA	coding	stop	NA	NA
ATTAGTACGAAATAAATGTG	neStops	+	chrIV	1136297	1136319	YDR334W	SWR1	366	388	FALSE	122	130	PLVRNKCEE	PLV*NKCEE	R125*	NA	NA	coding	stop	NA	NA
ATTATCAGTTGCCATTCCCA	neStops	-	chrXII	186455	186477	YLR023C	IZH3	653	675	FALSE	218	225	YYQLPFPW	YY*LPFPW	Q220*	NA	NA	coding	stop	NA	NA
ATTATCCAGGAAGACGACTT	neStops	-	chrX	76828	76850	YJL187C	SWE1	2413	2435	FALSE	805	812	IIQEDDFG	II*EDDFG	Q807*	NA	NA	coding	stop	NA	NA
ATTATCCCAACATTGAAATC	neStops	-	chrIV	1280219	1280241	YDR406W	PDR15	1010	1032	FALSE	337	344	ARFQCWDN	ARFQC*NN	W342*	D343N	NA	coding	stop	c(NA, -4.823)	4.823
ATTATCTCAGTTAAGTAAGA	neStops	+	chrIV	890932	890954	YDR213W	UPC2	1182	1204	FALSE	394	402	ALSQLSKMG	ALF*LSKMG	S396F	Q397*	NA	coding	stop	c(-3.023, NA)	3.023
ATTATTACAAACGCTCCTAG	neStops	-	chrXIII	61923	61945	YML104C	MDM1	378	400	FALSE	126	134	RLLQTLLVV	RLL*TLLVV	Q129*	NA	NA	coding	stop	NA	NA
ATTATTACAACAGTCCCCTC	neStops	+	chrVIII	257277	257299	YHR078W	YHR078W	918	940	FALSE	306	314	ALLQQSPQV	ALL*QSPQV	Q309*	NA	NA	coding	stop	NA	NA
ATTATTCAAGAGTTACTAAC	neStops	+	chrXII	635044	635066	YLR248W	RCK2	793	815	FALSE	265	272	IIQELLTG	II*ELLTG	Q267*	NA	NA	coding	stop	NA	NA
ATTATTCAGCCTATTCTTTC	neStops	+	chrVII	136700	136722	YGL195W	GCN1	5176	5198	FALSE	1726	1733	IIQPILSG	II*PILSG	Q1728*	NA	NA	coding	stop	NA	NA
ATTATTCAGGCCAGAAAACT	neStops	-	chrVIII	114619	114641	YHR005C	GPA1	277	299	FALSE	93	100	IIQARKLG	II*ARKLG	Q95*	NA	NA	coding	stop	NA	NA
ATTATTTCAGTACAAAAAAT	neStops	-	chrXII	139553	139575	YLL005C	SPO75	972	994	FALSE	324	332	LLFQYKKLV	LLF*YKKLV	Q327*	NA	NA	coding	stop	NA	NA
ATTCAAAAACTGTCATCTCA	neStops	+	chrIV	259809	259831	YDL112W	TRM3	895	917	FALSE	299	306	IQKLSSHG	I*KLSSHG	Q300*	NA	NA	coding	stop	NA	NA
ATTCAAAATACAAGAAAGGC	neStops	+	chrI	36917	36939	YAL059W	ECM1	409	431	FALSE	137	144	IQNTRKAG	I*NTRKAG	Q138*	NA	NA	coding	stop	NA	NA
ATTCAAAATCAAGTGCAGAG	neStops	+	chrXVI	182285	182307	YPL193W	RSA1	883	905	FALSE	295	302	IQNQVQRG	I*NQVQRG	Q296*	NA	NA	coding	stop	NA	NA
ATTCAAAGAGCCATATTAGA	neStops	-	chrIV	121168	121190	YDL190C	UFD2	403	425	FALSE	135	142	IQRAILEG	I*RAILEG	Q136*	NA	NA	coding	stop	NA	NA
ATTCAAATAGAAGCACAATT	neStops	-	chrXV	497570	497592	YOR093C	CMR2	4861	4883	FALSE	1621	1628	IQIEAQFG	I*IEAQFG	Q1622*	NA	NA	coding	stop	NA	NA
ATTCAAATCTGTATGCTAGC	neStops	+	chrIV	508531	508553	YDR033W	MRH1	385	407	FALSE	129	136	IQICMLAG	I*ICMLAG	Q130*	NA	NA	coding	stop	NA	NA
ATTCAAATGTTAATTGAAAA	neStops	-	chrX	489113	489135	YJR031C	GEA1	1678	1700	FALSE	560	567	IQMLIEKG	I*MLIEKG	Q561*	NA	NA	coding	stop	NA	NA
ATTCAACATTATCTGAAGAA	neStops	+	chrII	712638	712660	YBR246W	RRT2	1048	1070	FALSE	350	357	IQHYLKKG	I*YYLKKG	Q351*	H352Y	NA	coding	stop	c(NA, -2.298)	2.298
ATTCAACCCATTTATAACGA	neStops	-	chrIII	106771	106793	YCL008C	STP22	61	83	FALSE	21	28	IQPIYNDG	I*FIYNDG	Q22*	P23F	NA	coding	stop	c(NA, -8.3)	8.3
ATTCAACTAACCCCTATTTC	neStops	-	chrVIII	84771	84793	YHL009C	YAP3	268	290	FALSE	90	97	IQLTPISG	I*LTPISG	Q91*	NA	NA	coding	stop	NA	NA
ATTCAACTATTGATACGTTA	neStops	-	chrVII	956469	956491	YGR233C	PHO81	1720	1742	FALSE	574	581	IQLLIRYG	I*LLIRYG	Q575*	NA	NA	coding	stop	NA	NA
ATTCAAGAAACGAAGGAACC	neStops	+	chrXII	586707	586729	YLR224W	UCC1	244	266	FALSE	82	89	IQETKEPG	I*ETKEPG	Q83*	NA	NA	coding	stop	NA	NA
ATTCAAGAAGCTACCAAAGG	neStops	+	chrXIII	435562	435584	YMR083W	ADH3	775	797	FALSE	259	266	IQEATKGG	I*EATKGG	Q260*	NA	NA	coding	stop	NA	NA
ATTCAAGACCCTCAAATGAC	neStops	+	chrXII	372121	372143	YLR113W	HOG1	502	524	FALSE	168	175	IQDPQMTG	I*DPQMTG	Q169*	NA	NA	coding	stop	NA	NA
ATTCAAGAGCCACGAAGAGA	neStops	-	chrXII	629432	629454	YLR247C	IRC20	3901	3923	FALSE	1301	1308	IQEPRREG	I*EPRREG	Q1302*	NA	NA	coding	stop	NA	NA
ATTCAAGAGGCTAGGTCTAA	neStops	+	chrXV	165212	165234	YOL084W	PHM7	2857	2879	FALSE	953	960	IQEARSNG	I*EARSNG	Q954*	NA	NA	coding	stop	NA	NA
ATTCAAGCTGTTGCGGGGTT	neStops	+	chrVIII	440779	440801	YHR168W	MTG2	403	425	FALSE	135	142	IQAVAGLG	I*VVAGLG	Q136*	A137V	NA	coding	stop	c(NA, -3.194)	3.194
ATTCAAGGTGGTATTCTATC	neStops	+	chrXII	860788	860810	YLR369W	SSQ1	1237	1259	FALSE	413	420	IQGGILSG	I*GGILSG	Q414*	NA	NA	coding	stop	NA	NA
ATTCAAGGTTTGGAAAGGTA	neStops	-	chrIII	16291	16313	YCL064C	CHA1	568	590	FALSE	190	197	IQGLERYG	I*GLERYG	Q191*	NA	NA	coding	stop	NA	NA
ATTCAATCCTTTGGACACCT	neStops	-	chrXIII	834107	834129	YMR282C	AEP2	970	992	FALSE	324	331	IQSFGHLG	I*FFGHLG	Q325*	S326F	NA	coding	stop	c(NA, -4.567)	4.567
ATTCAATTCATGCAGTCTGA	neStops	-	chrXI	29843	29865	YKL215C	OXP1	823	845	FALSE	275	282	IQFMQSDG	I*FMQSDG	Q276*	NA	NA	coding	stop	NA	NA
ATTCAATTTCAAGATTCCTT	neStops	-	chrIV	1039259	1039281	YDR289C	RTT103	229	251	FALSE	77	84	IQFQDSFG	I*FQDSFG	Q78*	NA	NA	coding	stop	NA	NA
ATTCACAAATAACAAGCGGA	neStops	-	chrVII	697619	697641	YGR104C	SRB5	728	750	FALSE	243	250	NSQITSGG	NL*ITSGG	S244L	Q245*	NA	coding	stop	c(-1.67, NA)	1.67
ATTCACACAAATGGGGGATC	neStops	+	chrII	650919	650941	YBR213W	MET8	552	574	FALSE	184	192	LFTQMGDLA	LFI*MGDLA	T186I	Q187*	NA	coding	stop	c(-0.756, NA)	0.756
ATTCACTCAACAAAGATTAG	neStops	+	chrXIV	32114	32136	YNL323W	LEM3	171	193	FALSE	57	65	AFTQQRLAA	AFI*QRLAA	T59I	Q60*	NA	coding	stop	c(-5.1, NA)	5.1
ATTCAGACAAACCAAGTTCA	neStops	-	chrXII	781247	781269	YLR325C	RPL38	111	133	FALSE	37	45	PFRQTKFKV	PFR*TKFKV	Q40*	NA	NA	coding	stop	NA	NA
ATTCAGACAACCCTTAATCG	neStops	+	chrIV	1111467	1111489	YDR322W	MRPL35	879	901	FALSE	293	301	VFRQPLIED	VFR*PLIED	Q296*	NA	NA	coding	stop	NA	NA
ATTCAGCCCAAGATGGTGAA	neStops	+	chrXIV	649792	649814	YNR013C	PHO91	1899	1921	FALSE	633	641	DPSPSWAEW	DPSPS*TKW	W638*	A639T	E640K	coding	stop	c(NA, -1.206, -2.167)	2.167
ATTCAGTTTAAAAAAATTTG	neStops	-	chrV	458629	458651	YER144C	UBP5	1573	1595	FALSE	525	532	IQFKKICG	I*FKKICG	Q526*	NA	NA	coding	stop	NA	NA
ATTCCAAAAAGGGTTAGAAA	neStops	-	chrXII	135531	135553	YLL007C	LMO1	747	769	FALSE	249	257	VFQKGLEME	VF*KGLEME	Q251*	NA	NA	coding	stop	NA	NA
ATTCCAAACAATCCGGTCAA	neStops	+	chrIX	248025	248047	YIL057C	RGI2	350	372	FALSE	117	124	SFDRIVWN	SFDRIV*N	W123*	NA	NA	coding	stop	NA	NA
ATTCCAAACTTTATACACAG	neStops	+	chrXV	932624	932646	YOR328W	PDR10	822	844	FALSE	274	282	VFQTLYTVA	VF*TLYTVA	Q276*	NA	NA	coding	stop	NA	NA
ATTCCAAAGCCCGGTCCCTC	neStops	+	chrXII	983088	983110	YLR425W	TUS1	195	217	FALSE	65	73	QFQSPVPQA	QF*SPVPQA	Q67*	NA	NA	coding	stop	NA	NA
ATTCCAAAGTAACGGGAAGC	neStops	+	chrIV	1133704	1133726	YDR333C	RQC1	1706	1728	FALSE	569	576	ARFPLLWN	ARFPLL*N	W575*	NA	NA	coding	stop	NA	NA
ATTCCAAAGTTGTATTTGTT	neStops	-	chrX	66788	66810	YJL197W	UBP12	2984	3006	FALSE	995	1002	TKQIQLWN	TKQIQL*N	W1001*	NA	NA	coding	stop	NA	NA
ATTCCAACGAACATCTTGGT	neStops	+	chrX	235412	235434	YJL101C	GSH1	923	945	FALSE	308	315	ADQDVRWN	ADQDVH*N	R313H	W314*	NA	coding	stop	c(-5, NA)	5
ATTCCAAGACGTCTCCCGCA	neStops	+	chrVIII	508439	508461	YHR204W	MNL1	2121	2143	FALSE	707	715	TFQDVSRKD	TF*DVSRKD	Q709*	NA	NA	coding	stop	NA	NA
ATTCCAAGCTGCTTTAGCTT	neStops	-	chrIX	26064	26086	YIL169C	CSS1	21	43	FALSE	7	15	KFQAALALA	KF*AALALA	Q9*	NA	NA	coding	stop	NA	NA
ATTCCAAGTGGTGTAGGTGA	neStops	+	chrXII	689383	689405	YLR273C	PIG1	1625	1647	FALSE	542	549	SFTYTTWN	SFTYTT*N	W548*	NA	NA	coding	stop	NA	NA
ATTCCAATTTAAAGTTGGAA	neStops	-	chrII	145212	145234	YBL039C	URA7	495	517	FALSE	165	173	QFQFKVGKE	QF*FKVGKE	Q167*	NA	NA	coding	stop	NA	NA
ATTCCAATTTATCCCGTGTT	neStops	-	chrXV	470219	470241	YOR076C	SKI7	1380	1402	FALSE	460	468	EFQFIPCSG	EF*FIPCSG	Q462*	NA	NA	coding	stop	NA	NA
ATTCCAGATGGTGCTGGAAT	neStops	+	chrXI	113875	113897	YKL178C	STE3	731	753	FALSE	244	251	THSSTIWN	THSSTI*N	W250*	NA	NA	coding	stop	NA	NA
ATTCCAGATTGAGACCAATT	neStops	+	chrXIII	814460	814482	YMR274C	RCE1	830	852	FALSE	277	284	SKLVSIWN	SKLVSI*N	W283*	NA	NA	coding	stop	NA	NA
ATTCCAGGTAGTTTGATAAG	neStops	-	chrXII	325108	325130	YLR092W	SUL2	1565	1587	FALSE	522	529	ASYQTTWN	ASYQTT*N	W528*	NA	NA	coding	stop	NA	NA
ATTCCATAAGGAGTAGCGCT	neStops	+	chrXV	453325	453347	YOR067C	ALG8	116	138	FALSE	39	46	SKRYSLWN	SKRYSL*N	W45*	NA	NA	coding	stop	NA	NA
ATTCCATATTGTTCCATTAT	neStops	-	chrXIII	311379	311401	YMR018W	PEX9	1172	1194	FALSE	391	398	PNNGTIWN	PNNGTI*N	W397*	NA	NA	coding	stop	NA	NA
ATTCCATGAGTCTTGCTCAC	neStops	-	chrXV	956379	956401	YOR337W	TEA1	2036	2058	FALSE	679	686	SSEQDSWN	SSEQDS*N	W685*	NA	NA	coding	stop	NA	NA
ATTCCATGCTGATCTTTGGT	neStops	+	chrX	591193	591215	YJR090C	GRR1	3113	3135	FALSE	1038	1045	AHQRSAWN	AHQRSA*N	W1044*	NA	NA	coding	stop	NA	NA
ATTCCATTGATCGTAGGAGA	neStops	+	chrXV	479003	479025	YOR081C	TGL5	164	186	FALSE	55	62	AISYDQWN	AISYDQ*N	W61*	NA	NA	coding	stop	NA	NA
ATTCCCAAATCCATAAGATA	neStops	+	chrVIII	19948	19970	YHL040C	ARN1	1002	1024	FALSE	334	342	IPILWIWEY	IPILWI*KY	W340*	E341K	NA	coding	stop	c(NA, -3.967)	3.967
ATTCCCAATTTGCGGGTAGT	neStops	+	chrXVI	693809	693831	YPR074C	TKL1	1008	1030	FALSE	336	344	GQLPANWES	GQLPAN*KS	W342*	E343K	NA	coding	stop	c(NA, -2.124)	2.124
ATTCCCATGGAGTGCCTGTG	neStops	+	chrX	58153	58175	YJL200C	ACO2	639	661	FALSE	213	221	ALTGTPWEL	ALTGTP*KL	W219*	E220K	NA	coding	stop	c(NA, -3.995)	3.995
ATTCCGAGTGTGCAGTTTCT	neStops	-	chrXVI	338068	338090	YPL112C	PEX25	531	553	FALSE	177	185	PFRVCSFLG	PF*VCSFLG	R179*	NA	NA	coding	stop	NA	NA
ATTCGAGCAAGTATATTTGG	neStops	-	chrX	123970	123992	YJL157C	FAR1	2337	2359	FALSE	779	787	TFEQVYLGD	TFE*VYLGD	Q782*	NA	NA	coding	stop	NA	NA
ATTCGAGGCGATGAAAACTT	neStops	-	chrXVI	476933	476955	YPL040C	ISM1	2047	2069	FALSE	683	690	IRGDENLG	I*GDENLG	R684*	NA	NA	coding	stop	NA	NA
ATTCTCAACAACTGCGTACG	neStops	+	chrIII	255056	255078	YCR081W	SRB8	686	708	FALSE	229	236	DSQQLRTW	DF*QLRTW	S230F	Q231*	NA	coding	stop	c(-3.048, NA)	3.048
ATTCTCAAGCTACTCTTGAA	neStops	-	chrVIII	265798	265820	YHR080C	LAM4	1019	1041	FALSE	340	347	DSQATLEG	DF*ATLEG	S341F	Q342*	NA	coding	stop	c(-2.404, NA)	2.404
ATTCTCAAGGAACAGGATAT	neStops	+	chrIV	168885	168907	YDL161W	ENT1	1172	1194	FALSE	391	398	NSQGTGYR	NF*GTGYR	S392F	Q393*	NA	coding	stop	c(-5.804, NA)	5.804
ATTCTCAGGGCACTACACAG	neStops	+	chrXII	126474	126496	YLL012W	YEH1	941	963	FALSE	314	321	HSQGTTQG	HF*GTTQG	S315F	Q316*	NA	coding	stop	c(-6, NA)	6
ATTCTCAGTTACAGCAGGCG	neStops	-	chrXVI	83891	83913	YPL247C	YPL247C	284	306	FALSE	95	102	HSQLQQAR	HF*LQQAR	S96F	Q97*	NA	coding	stop	c(-2.541, NA)	2.541
ATTCTGTCAAAGAGCACATT	neStops	-	chrIV	483146	483168	YDR018C	YDR018C	693	715	FALSE	231	239	AFCQRAHLD	AFC*RAHLD	Q234*	NA	NA	coding	stop	NA	NA
ATTGAACAAGAGAACTATCT	neStops	-	chrVIII	28849	28871	YHL035C	VMR1	3886	3908	FALSE	1296	1303	IEQENYLG	IE*ENYLG	Q1298*	NA	NA	coding	stop	NA	NA
ATTGAACCAATTCAATCCAC	neStops	+	chrXI	351539	351561	YKL046C	DCW1	1064	1086	FALSE	355	362	TCGLNWFN	TCGLN*FN	W360*	NA	NA	coding	stop	NA	NA
ATTGAACGAGGCAACCCAAT	neStops	-	chrXI	160396	160418	YKL155C	RSM22	925	947	FALSE	309	316	IERGNPMG	IE*GNPMG	R311*	NA	NA	coding	stop	NA	NA
ATTGACCAAATTAGTGTCGC	neStops	+	chrXVI	86342	86364	YPL245W	YPL245W	757	779	FALSE	253	260	IDQISVAG	ID*ISVAG	Q255*	NA	NA	coding	stop	NA	NA
ATTGACTCCAAAGGTGAATC	neStops	-	chrXII	557117	557139	YLR207W	HRD3	330	352	FALSE	110	118	SQIHLWSQY	SQIHL*NQY	W115*	S116N	NA	coding	stop	c(NA, -0.115)	0.115
ATTGAGACAAATAGCGTCCG	neStops	-	chrVIII	259239	259261	YHR079C	IRE1	2331	2353	FALSE	777	785	LLRQIASGV	LLR*IASGV	Q780*	NA	NA	coding	stop	NA	NA
ATTGAGGCAGTTAGAAGAGC	neStops	-	chrXV	920006	920028	YOR322C	LDB19	1035	1057	FALSE	345	353	ELRQLEEQV	ELR*LEEQV	Q348*	NA	NA	coding	stop	NA	NA
ATTGATACGAAAAGAAAGGA	neStops	+	chrIV	581310	581332	YDR065W	RRG1	624	646	FALSE	208	216	ILIRKERKD	ILI*KERKD	R211*	NA	NA	coding	stop	NA	NA
ATTGCAAAAGGCCACCATCC	neStops	+	chrXII	878776	878798	YLR380W	CSR1	495	517	FALSE	165	173	ELQKATIQG	EL*KATIQG	Q167*	NA	NA	coding	stop	NA	NA
ATTGCAAACGATTCTTTCAT	neStops	+	chrV	111999	112021	YEL022W	GEA2	579	601	FALSE	193	201	VLQTILSLA	VL*TILSLA	Q195*	NA	NA	coding	stop	NA	NA
ATTGCAAAGACAACAACAAG	neStops	+	chrXII	555729	555751	YLR206W	ENT2	1152	1174	FALSE	384	392	QLQRQQQEE	QL*RQQQEE	Q386*	NA	NA	coding	stop	NA	NA
ATTGCAAAGCGGCCACCGCA	neStops	-	chrIII	105512	105534	YCL009C	ILV6	15	37	FALSE	5	13	LLQSGHRRV	LL*SGHRRV	Q7*	NA	NA	coding	stop	NA	NA
ATTGCAAATCAGACTAAATG	neStops	+	chrXII	183739	183761	YLR021W	IRC25	117	139	FALSE	39	47	LLQIRLNGE	LL*IRLNGE	Q41*	NA	NA	coding	stop	NA	NA
ATTGCAACTGTTACAAAGAT	neStops	-	chrXIII	783906	783928	YMR258C	ROY1	354	376	FALSE	118	126	GLQLLQRLV	GL*LLQRLV	Q120*	NA	NA	coding	stop	NA	NA
ATTGCAAGAACAAAGAATTC	neStops	+	chrXII	833134	833156	YLR352W	YLR352W	2019	2041	FALSE	673	681	SLQEQRIQE	SL*EQRIQE	Q675*	NA	NA	coding	stop	NA	NA
ATTGCAAGACAAGAGCTACG	neStops	-	chrX	691133	691155	YJR140C	HIR3	4542	4564	FALSE	1514	1522	QLQDKSYVE	QL*DKSYVE	Q1516*	NA	NA	coding	stop	NA	NA
ATTGCACAAATTCCAGGATT	neStops	-	chrXV	190397	190419	YOL075C	YOL075C	3124	3146	FALSE	1042	1049	IAQIPGLG	IV*IPGLG	A1043V	Q1044*	NA	coding	stop	c(-2.433, NA)	2.433
ATTGCACCATGTTAGTAAGC	neStops	+	chrIV	1106290	1106312	YDR320C	SWA2	1790	1812	FALSE	597	604	SSLLTWCN	SSLLT*YN	W602*	C603Y	NA	coding	stop	c(NA, -5.467)	5.467
ATTGCAGGATTCTCATTGTC	neStops	+	chrIX	254665	254687	YIL054W	YIL054W	123	145	FALSE	41	49	KLQDSHCPV	KL*DSHCPV	Q43*	NA	NA	coding	stop	NA	NA
ATTGCAGTGCATTGATAACG	neStops	+	chrIV	829833	829855	YDR183W	PLP1	249	271	FALSE	83	91	RLQCIDNEA	RL*CIDNEA	Q85*	NA	NA	coding	stop	NA	NA
ATTGCCATTGTTGGAAATAC	neStops	+	chrIX	356412	356434	YIR001C	SGN1	462	484	FALSE	154	162	NQYFQQWQW	NQYFQQ*QW	W160*	NA	NA	coding	stop	NA	NA
ATTGCCCAGCAAATATTCAA	neStops	+	chrXI	496222	496244	YKR028W	SAP190	1966	1988	FALSE	656	663	IAQQIFNG	IV*QIFNG	A657V	Q658*	NA	coding	stop	c(3.707, NA)	3.707
ATTGCGAGATCCGAGGAACT	neStops	-	chrXIII	567303	567325	YMR154C	RIM13	858	880	FALSE	286	294	KLRDPRNSA	KL*DPRNSA	R288*	NA	NA	coding	stop	NA	NA
ATTGCTCAGCAGAAAATTAA	neStops	-	chrII	421858	421880	YBR086C	IST2	1162	1184	FALSE	388	395	IAQQKING	IV*QKING	A389V	Q390*	NA	coding	stop	c(1.872, NA)	1.872
ATTGCTCCAATCAGGATGCT	neStops	-	chrXIII	771585	771607	YMR250W	GAD1	785	807	FALSE	262	269	AKHPDWSN	AKHPD*NN	W267*	S268N	NA	coding	stop	c(NA, -1.43)	1.43
ATTGCTCCCAGGAGTCGACC	neStops	-	chrV	193543	193565	YER019W	ISC1	747	769	FALSE	249	257	GLVDSWEQL	GLVDS*KQL	W254*	E255K	NA	coding	stop	c(NA, -3.956)	3.956
ATTGGCAAGCTCCACTATTA	neStops	+	chrVII	552720	552742	YGR032W	GSC2	4457	4479	FALSE	1486	1493	HWQAPLLW	HW*APLLW	Q1488*	NA	NA	coding	stop	NA	NA
ATTGGCACAAGCGCATAACC	neStops	+	chrVIII	51473	51495	YHL027W	RIM101	363	385	FALSE	121	129	PLAQAHNPA	PLV*AHNPA	A123V	Q124*	NA	coding	stop	c(-0.714, NA)	0.714
ATTGGCCAATTATTCGAAGT	neStops	-	chrXI	455400	455422	YKR009C	FOX2	1633	1655	FALSE	545	552	IGQLFEVG	IG*LFEVG	Q547*	NA	NA	coding	stop	NA	NA
ATTGGCCCACTTGTCAGGCA	neStops	-	chrXV	196886	196908	YOL071W	SDH5	380	402	FALSE	127	134	PLPDKWAN	PLPDK*TN	W132*	A133T	NA	coding	stop	c(NA, -0.107)	0.107
ATTGGGCAGGGTAGATTGAT	neStops	-	chrIV	1062520	1062542	YDR300C	PRO1	250	272	FALSE	84	91	IGQGRLIG	IG*GRLIG	Q86*	NA	NA	coding	stop	NA	NA
ATTGGTCAAGGTGCATCAGG	neStops	-	chrVIII	96040	96062	YHL007C	STE20	1876	1898	FALSE	626	633	IGQGASGG	IG*GASGG	Q628*	NA	NA	coding	stop	NA	NA
ATTGTACCACTTAGGCACAA	neStops	+	chrIV	567984	568006	YDR058C	TGL2	698	720	FALSE	233	240	SFVPKWYN	SFVPK*YN	W238*	NA	NA	coding	stop	NA	NA
ATTGTACCATCTGGTTACGG	neStops	+	chrXIV	273436	273458	YNL194C	YNL194C	158	180	FALSE	53	60	PSVTRWYN	PSVTR*YN	W58*	NA	NA	coding	stop	NA	NA
ATTGTACCATTTCCCGTTTC	neStops	+	chrIV	1113647	1113669	YDR323C	PEP7	359	381	FALSE	120	127	PRNGKWYN	PRNGK*YN	W125*	NA	NA	coding	stop	NA	NA
ATTGTACGATCGGGATTAGC	neStops	+	chrVIII	108908	108930	YHR002W	LEU5	97	119	FALSE	33	40	IVRSGLAG	IV*SGLAG	R35*	NA	NA	coding	stop	NA	NA
ATTGTGCAAGAATTATTGGG	neStops	+	chrIV	780051	780073	YDR161W	ACL4	1009	1031	FALSE	337	344	IVQELLGG	IV*ELLGG	Q339*	NA	NA	coding	stop	NA	NA
ATTGTGCAGATGCTGGTTGT	neStops	-	chrIX	266604	266626	YIL047C	SYG1	1198	1220	FALSE	400	407	IVQMLVVG	IV*MLVVG	Q402*	NA	NA	coding	stop	NA	NA
ATTGTGGCAGGGTGATATGA	neStops	+	chrVI	193330	193352	YFR020W	CSS2	594	616	FALSE	198	206	GLWQGDMMV	GLW*GDMMV	Q201*	NA	NA	coding	stop	NA	NA
ATTGTTCAACGTTTGCCTCT	neStops	-	chrII	90720	90742	YBL070C	YBL070C	184	206	FALSE	62	69	IVQRLPLG	IV*RLPLG	Q64*	NA	NA	coding	stop	NA	NA
ATTTACAACCACCTTCAGAA	neStops	-	chrIV	1029426	1029448	YDR283C	GCN2	602	624	FALSE	201	208	DLQPPSEW	DL*PPSEW	Q203*	NA	NA	coding	stop	NA	NA
ATTTACAACGTAAGCAACTA	neStops	+	chrII	147849	147871	YBL037W	APL3	641	663	FALSE	214	221	DLQRKQLW	DL*RKQLW	Q216*	NA	NA	coding	stop	NA	NA
ATTTACAGAGATGTTTGAGT	neStops	+	chrXVI	466224	466246	YPL047W	SGF11	263	285	FALSE	88	95	HLQRCLSR	HL*RCLSR	Q90*	NA	NA	coding	stop	NA	NA
ATTTATTCAGGACGCTGCCA	neStops	-	chrVII	448172	448194	YGL026C	TRP5	342	364	FALSE	114	122	RFIQDAAKA	RFI*DAAKA	Q117*	NA	NA	coding	stop	NA	NA
ATTTCAAACAGTGAAGCTTC	neStops	+	chrII	469230	469252	YBR114W	RAD16	1983	2005	FALSE	661	669	GFQTVKLQG	GF*TVKLQG	Q663*	NA	NA	coding	stop	NA	NA
ATTTCAAATGGAGTCAGAAG	neStops	-	chrIX	229679	229701	YIL071C	PCI8	294	316	FALSE	98	106	IFQMESEEV	IF*MESEEV	Q100*	NA	NA	coding	stop	NA	NA
ATTTCAAATTGGATTTAAAA	neStops	-	chrXII	633009	633031	YLR247C	IRC20	324	346	FALSE	108	116	LFQIGFKME	LF*IGFKME	Q110*	NA	NA	coding	stop	NA	NA
ATTTCAACCTGTTCAGCTAA	neStops	-	chrXIII	844871	844893	YMR287C	DSS1	453	475	FALSE	151	159	EFQPVQLME	EF*SVQLME	Q153*	P154S	NA	coding	stop	c(NA, -2.627)	2.627
ATTTCAAGATTCCTTTGGAA	neStops	-	chrIV	1039254	1039276	YDR289C	RTT103	234	256	FALSE	78	86	QFQDSFGKV	QF*DSFGKV	Q80*	NA	NA	coding	stop	NA	NA
ATTTCAATTATTAGGAAAGA	neStops	+	chrXI	641211	641233	YKR101W	SIR1	672	694	FALSE	224	232	LFQLLGKRV	LF*LLGKRV	Q226*	NA	NA	coding	stop	NA	NA
ATTTCAATTTAGTTCGCGTC	neStops	+	chrXV	317633	317655	YOL004W	SIN3	696	718	FALSE	232	240	KFQFSSRPD	KF*FSSRPD	Q234*	NA	NA	coding	stop	NA	NA
ATTTCACAGGCAGATGATAA	neStops	-	chrIV	511727	511749	YDR034C	LYS14	361	383	FALSE	121	128	ISQADDNG	IL*ADDNG	S122L	Q123*	NA	coding	stop	c(-0.568, NA)	0.568
ATTTCACCCAGTCATGGTCT	neStops	-	chrIX	86538	86560	YIL140W	AXL2	1173	1195	FALSE	391	399	SQDHDWVKF	SQDHD*IKF	W396*	V397I	NA	coding	stop	c(NA, 0.871)	0.871
ATTTCAGAGAGTATTTGCGT	neStops	-	chrXIII	469359	469381	YMR101C	SRT1	96	118	FALSE	32	40	IFQRVFAWV	IF*RVFAWV	Q34*	NA	NA	coding	stop	NA	NA
ATTTCAGAGTAAAAAGGCAG	neStops	+	chrX	727866	727888	YJR155W	AAD10	462	484	FALSE	154	162	RFQSKKAVE	RF*SKKAVE	Q156*	NA	NA	coding	stop	NA	NA
ATTTCAGATGCAAATGCAAC	neStops	+	chrVII	679291	679313	YGR097W	ASK10	597	619	FALSE	199	207	QFQMQMQQE	QF*MQMQQE	Q201*	NA	NA	coding	stop	NA	NA
ATTTCAGCCAGGTCAAAAGC	neStops	+	chrIV	187549	187571	YDL149W	ATG9	2625	2647	FALSE	875	883	QFQPGQKPE	QF*SGQKPE	Q877*	P878S	NA	coding	stop	c(NA, -3.42)	3.42
ATTTCAGGAATGGGCCCAGT	neStops	+	chrX	317865	317887	YJL062W	LAS21	582	604	FALSE	194	202	LFQEWAQWD	LF*EWAQWD	Q196*	NA	NA	coding	stop	NA	NA
ATTTCCATTTGACCTCATAT	neStops	-	chrXVI	124637	124659	YPL226W	NEW1	2871	2893	FALSE	957	965	FQYEVKWKY	FQYEVK*KY	W963*	NA	NA	coding	stop	NA	NA
ATTTCCCAAATGAACGATTA	neStops	+	chrXIV	610076	610098	YNL012W	SPO1	307	329	FALSE	103	110	ISQMNDYG	IF*MNDYG	S104F	Q105*	NA	coding	stop	c(-0.568, NA)	0.568
ATTTCCCAGTTTGGCCAGAC	neStops	+	chrXIII	280059	280081	YMR007W	YMR007W	100	122	FALSE	34	41	ISQFGQTG	IF*FGQTG	S35F	Q36*	NA	coding	stop	c(-6, NA)	6
ATTTCCTCAGTTTACACCAC	neStops	-	chrX	125404	125426	YJL157C	FAR1	903	925	FALSE	301	309	EFPQFTPQE	EFF*FTPQE	P303F	Q304*	NA	coding	stop	c(-1.733, NA)	1.733
ATTTCGAAGAGAACTAAAAT	neStops	-	chrXII	244590	244612	YLR049C	YLR049C	561	583	FALSE	187	195	LFRRELKLE	LF*RELKLE	R189*	NA	NA	coding	stop	NA	NA
ATTTCTACAAAAGCTGAGGA	neStops	+	chrXV	876144	876166	YOR298W	MUM3	546	568	FALSE	182	190	EFLQKLRKG	EFL*KLRKG	Q185*	NA	NA	coding	stop	NA	NA
ATTTCTCAAAAGACAATGGA	neStops	+	chrXIV	447761	447783	YNL094W	APP1	151	173	FALSE	51	58	ISQKTMDG	IF*KTMDG	S52F	Q53*	NA	coding	stop	c(-4.496, NA)	4.496
ATTTCTCAAAATGATGAGAC	neStops	+	chrX	232813	232835	YJL102W	MEF2	1513	1535	FALSE	505	512	ISQNDETG	IF*NDETG	S506F	Q507*	NA	coding	stop	c(-3.741, NA)	3.741
ATTTGAACAAGCTCTCGAAG	neStops	-	chrIV	375133	375155	YDL044C	MTF2	135	157	FALSE	45	53	TFEQALEEE	TFE*ALEEE	Q48*	NA	NA	coding	stop	NA	NA
ATTTGAACGAAAATCAGATA	neStops	-	chrVII	967214	967236	YGR238C	KEL2	1452	1474	FALSE	484	492	AFERKSDRE	AFE*KSDRE	R487*	NA	NA	coding	stop	NA	NA
ATTTGACCACCGACTTACTT	neStops	-	chrX	87011	87033	YJL181W	RBH1	1352	1374	FALSE	451	458	TQVSRWSN	TQVSR*SN	W456*	NA	NA	coding	stop	NA	NA
ATTTGGCAAGGTTTCATGGC	neStops	-	chrXIII	74594	74616	YML099C	ARG81	2425	2447	FALSE	809	816	IWQGFMAG	IW*GFMAG	Q811*	NA	NA	coding	stop	NA	NA
CAAAAACAAAAAGATGCCGA	neStops	-	chrX	188344	188366	YJL123C	MTC1	1075	1097	FALSE	359	366	QKQKDADG	QK*KDADG	Q361*	NA	NA	coding	stop	NA	NA
CAAAAACCGACTGACAGCTG	neStops	+	chrVII	606654	606676	YGR058W	PEF1	519	541	FALSE	173	181	GKNRLTAEE	GKN*LTAEE	R176*	NA	NA	coding	stop	NA	NA
CAAAACAAAATTTAGAATTC	neStops	-	chrIV	131081	131103	YDL183C	YDL183C	731	753	FALSE	244	251	SKQNLEFR	SK*NLEFR	Q246*	NA	NA	coding	stop	NA	NA
CAAAAGACAAGACAAATTAA	neStops	+	chrVII	669751	669773	YGR092W	DBF2	1563	1585	FALSE	521	529	FKRQDKLTA	FKR*DKLTA	Q524*	NA	NA	coding	stop	NA	NA
CAAAAGCAGTTGGATATTCT	neStops	+	chrVII	467884	467906	YGL014W	PUF4	1744	1766	FALSE	582	589	QKQLDILG	QK*LDILG	Q584*	NA	NA	coding	stop	NA	NA
CAAAATACAGTATTCCATTA	neStops	-	chrX	44793	44815	YJL207C	LAA1	2619	2641	FALSE	873	881	SKIQYSIME	SKI*YSIME	Q876*	NA	NA	coding	stop	NA	NA
CAAACAAAAAGAGTTGGAAC	neStops	+	chrV	252876	252898	YER049W	TPA1	1149	1171	FALSE	383	391	IKQKELEQE	IK*KELEQE	Q385*	NA	NA	coding	stop	NA	NA
CAAACAAACAGGTCTAGTAT	neStops	-	chrXIV	496066	496088	YNL068C	FKH2	2202	2224	FALSE	734	742	NKQTGLVLD	NK*TGLVLD	Q736*	NA	NA	coding	stop	NA	NA
CAAACAAATCAGAGGAACCC	neStops	+	chrX	20075	20097	YJL219W	HXT9	579	601	FALSE	193	201	PKQIRGTLV	PK*IRGTLV	Q195*	NA	NA	coding	stop	NA	NA
CAAACAAATGAAAAAACGTA	neStops	-	chrIV	390218	390240	YDL035C	GPR1	1818	1840	FALSE	606	614	YKQMKKRRA	YK*MKKRRA	Q608*	NA	NA	coding	stop	NA	NA
CAAACAACAACAGGAAAAGA	neStops	+	chrXII	1024455	1024477	YLR445W	GMC2	267	289	FALSE	89	97	SKQQQEKMD	SK**QEKMD	Q91*	Q92*	NA	coding	stop	c(NA, NA)	NA
CAAACAACTAAAGGCCATCA	neStops	-	chrXVI	337624	337646	YPL112C	PEX25	975	997	FALSE	325	333	HKQLKAIKD	HK*LKAIKD	Q327*	NA	NA	coding	stop	NA	NA
CAAACAACTTCCGCTGATCT	neStops	-	chrXII	632961	632983	YLR247C	IRC20	372	394	FALSE	124	132	DKQLPLILD	DK*FPLILD	Q126*	L127F	NA	coding	stop	c(NA, -1.056)	1.056
CAAACAAGAATCGGTTAATA	neStops	-	chrVII	274938	274960	YGL124C	MON1	1755	1777	FALSE	585	593	FKQESVNMV	FK*ESVNMV	Q587*	NA	NA	coding	stop	NA	NA
CAAACAAGCAGTTGTAAGAC	neStops	-	chrI	103541	103563	YAL024C	LTE1	2310	2332	FALSE	770	778	IKQAVVRPA	IK*AVVRPA	Q772*	NA	NA	coding	stop	NA	NA
CAAACAAGCGGCTGATAATA	neStops	+	chrIV	814916	814938	YDR176W	NGG1	465	487	FALSE	155	163	IKQAADNMA	IK*AADNMA	Q157*	NA	NA	coding	stop	NA	NA
CAAACAAGGTCTGTCTGTTG	neStops	+	chrII	635244	635266	YBR207W	FTH1	99	121	FALSE	33	41	VKQGLSVED	VK*GLSVED	Q35*	NA	NA	coding	stop	NA	NA
CAAACAATTGATGAAGCTGC	neStops	+	chrIV	965175	965197	YDR254W	CHL4	63	85	FALSE	21	29	FKQLMKLPV	FK*LMKLPV	Q23*	NA	NA	coding	stop	NA	NA
CAAACAGAAACTGGTTGGAG	neStops	+	chrIV	892946	892968	YDR214W	AHA1	72	94	FALSE	24	32	FKQKLVGVE	FK*KLVGVE	Q26*	NA	NA	coding	stop	NA	NA
CAAACAGAACCAGTTTGTGA	neStops	-	chrVII	53990	54012	YGL236C	MTO1	1785	1807	FALSE	595	603	VKQNQFVKA	VK*NQFVKA	Q597*	NA	NA	coding	stop	NA	NA
CAAACAGAAGGAGTTACAAA	neStops	-	chrX	102622	102644	YJL168C	SET2	1785	1807	FALSE	595	603	NKQKELQKE	NK*KELQKE	Q597*	NA	NA	coding	stop	NA	NA
CAAACAGGGCCTGTATCGCG	neStops	+	chrIII	224443	224465	YCR060W	TAH1	45	67	FALSE	15	23	FKQGLYREA	FK*GLYREA	Q17*	NA	NA	coding	stop	NA	NA
CAAACCCAAACTAGGCGTAT	neStops	+	chrXIV	482075	482097	YNL077W	APJ1	685	707	FALSE	229	236	QTQTRRMG	QI*TRRMG	T230I	Q231*	NA	coding	stop	c(-3.319, NA)	3.319
CAAACCCAGCGCTCTAATAG	neStops	+	chrVII	139756	139778	YGL194C-A	YGL194C-A	184	206	FALSE	62	69	PLLERWVW	PLLER*IW	W67*	V68I	NA	coding	stop	c(NA, -0.2)	0.2
CAAACGAACTAAAAGTGATC	neStops	-	chrIV	1317320	1317342	YDR422C	SIP1	432	454	FALSE	144	152	VKRTKSDLD	VK*TKSDLD	R146*	NA	NA	coding	stop	NA	NA
CAAACGCAGGGCTCTGTAAA	neStops	-	chrXI	171023	171045	YKL148C	SDH1	85	107	FALSE	29	36	QTQGSVNG	QM*GSVNG	T30M	Q31*	NA	coding	stop	c(-0.256, NA)	0.256
CAAACGCCAACCATCACAAT	neStops	+	chrV	546834	546856	YER178W	PDA1	18	40	FALSE	6	14	FKRQPSQLV	FKC*PSQLV	R8C	Q9*	NA	coding	stop	c(-1.857, NA)	1.857
CAAACTACAGAAGTTGACTG	neStops	-	chrV	37713	37735	YEL061C	CIN8	1803	1825	FALSE	601	609	NKLQKLTEV	NKL*KLTEV	Q604*	NA	NA	coding	stop	NA	NA
CAAACTCAATCTCAGCAGTT	neStops	-	chrVIII	372821	372843	YHR135C	YCK1	1468	1490	FALSE	490	497	QTQSQQFG	QI*SQQFG	T491I	Q492*	NA	coding	stop	c(-0.962, NA)	0.962
CAAAGACCAATGTAACGTTG	neStops	+	chrIV	947199	947221	YDR242W	AMD2	393	415	FALSE	131	139	LKDQCNVEG	LKD*CNVEG	Q134*	NA	NA	coding	stop	NA	NA
CAAAGAGCAATGGCAAAAAT	neStops	-	chrVIII	515687	515709	YHR207C	SET5	777	799	FALSE	259	267	VKEQWQKLA	VKE*WQKLA	Q262*	NA	NA	coding	stop	NA	NA
CAAAGAGCAGCTCAAAAACA	neStops	-	chrXV	62449	62471	YOL138C	RTC1	2880	2902	FALSE	960	968	LKEQLKNTE	LKE*LKNTE	Q963*	NA	NA	coding	stop	NA	NA
CAAAGATCAAAAGTTCGCAA	neStops	-	chrX	314788	314810	YJL066C	MPM1	63	85	FALSE	21	29	IKDQKFATA	IKD*KFATA	Q24*	NA	NA	coding	stop	NA	NA
CAAAGCAAGTAGTAGCATTC	neStops	-	chrIX	58721	58743	YIL151C	ESL1	1952	1974	FALSE	651	658	SKQVVAFW	SK*VVAFW	Q653*	NA	NA	coding	stop	NA	NA
CAAAGCTCAGAAGATCGTGC	neStops	+	chrXIV	664695	664717	YNR018W	RCF2	426	448	FALSE	142	150	TKAQKIVQA	TKV*KIVQA	A144V	Q145*	NA	coding	stop	c(-1.825, NA)	1.825
CAAAGTCAACGGCATATAGT	neStops	+	chrIV	907396	907418	YDR221W	GTB1	67	89	FALSE	23	30	QSQRHIVG	QS*RHIVG	Q25*	NA	NA	coding	stop	NA	NA
CAAATACCAACTATTAAGCG	neStops	+	chrXIV	291513	291535	YNL186W	UBP10	2016	2038	FALSE	672	680	VKYQLLSVV	VKY*LLSVV	Q675*	NA	NA	coding	stop	NA	NA
CAAATCCAAGCTAGACAAGC	neStops	-	chrIV	557864	557886	YDR051C	DET1	175	197	FALSE	59	66	QIQARQAG	QI*ARQAG	Q61*	NA	NA	coding	stop	NA	NA
CAAATCCAGAACTTTCTACC	neStops	-	chrII	185829	185851	YBL019W	APN2	1477	1499	FALSE	493	500	PGRKFWIC	PGRKF*IC	W498*	NA	NA	coding	stop	NA	NA
CAAATCCAGTGGTATACATT	neStops	-	chrXIV	90612	90634	YNL288W	CAF40	310	332	FALSE	104	111	PNVYHWIC	PNVYH*IC	W109*	NA	NA	coding	stop	NA	NA
CAAATCGCAACCCAAAACAC	neStops	+	chrVII	952232	952254	YGR230W	BNS1	339	361	FALSE	113	121	AKSQPKTLE	AKL*PKTLE	S115L	Q116*	NA	coding	stop	c(-3.1, NA)	3.1
CAAATCTCAGTATGAGATGA	neStops	+	chrXV	588198	588220	YOR140W	SFL1	1218	1240	FALSE	406	414	PKSQYEMMV	PKF*YEMMV	S408F	Q409*	NA	coding	stop	c(-1.57, NA)	1.57
CAAATTCAAGTTCATCCAAC	neStops	-	chrV	66043	66065	YEL047C	FRD1	733	755	FALSE	245	252	QIQVHPTG	QI*VHPTG	Q247*	NA	NA	coding	stop	NA	NA
CAAATTCCAAACTGGTGGTC	neStops	-	chrIV	71656	71678	YDL215C	GDH2	2241	2263	FALSE	747	755	YKFQTGGPD	YKF*TGGPD	Q750*	NA	NA	coding	stop	NA	NA
CAAATTGCCAATGTTCAGAA	neStops	-	chrXIV	32306	32328	YNL323W	LEM3	363	385	FALSE	121	129	IPSEHWQFV	IPSEH*QFV	W126*	NA	NA	coding	stop	NA	NA
CAACAAAAAAATAAGAATAA	neStops	+	chrXI	387679	387701	YKL027W	TCD2	118	140	FALSE	40	47	QQKNKNKG	Q*KNKNKG	Q41*	NA	NA	coding	stop	NA	NA
CAACAAAAGAAAGCAATGGA	neStops	-	chrIX	318822	318844	YIL017C	VID28	2122	2144	FALSE	708	715	QQKKAMEG	Q*KKAMEG	Q709*	NA	NA	coding	stop	NA	NA
CAACAAAAGCAAAGACAGCA	neStops	-	chrXII	873292	873314	YLR376C	PSY3	241	263	FALSE	81	88	QQKQRQHG	Q*KQRQHG	Q82*	NA	NA	coding	stop	NA	NA
CAACAAAATCAGATTTCTCG	neStops	-	chrII	778901	778923	YBR288C	APM3	541	563	FALSE	181	188	QQNQISRG	Q*NQISRG	Q182*	NA	NA	coding	stop	NA	NA
CAACAAAATTTATGGCTATT	neStops	+	chrX	706410	706432	YJR148W	BAT2	667	689	FALSE	223	230	QQNLWLFG	Q*NLWLFG	Q224*	NA	NA	coding	stop	NA	NA
CAACAAACGAGAAGAAATAT	neStops	-	chrXI	607533	607555	YKR089C	TGL4	811	833	FALSE	271	278	QQTRRNIG	Q*MRRNIG	Q272*	T273M	NA	coding	stop	c(NA, -5.658)	5.658
CAACAAACTGATATCTCACC	neStops	+	chrXIV	687740	687762	YNR033W	ABZ1	106	128	FALSE	36	43	QQTDISPG	Q*IDISPG	Q37*	T38I	NA	coding	stop	c(NA, -1.796)	1.796
CAACAAAGACTTATATTCCA	neStops	-	chrIV	733785	733807	YDR139C	RUB1	118	140	FALSE	40	47	QQRLIFQG	Q*RLIFQG	Q41*	NA	NA	coding	stop	NA	NA
CAACAAAGCATCTTTGACCC	neStops	+	chrXII	511555	511577	YLR177W	YLR177W	502	524	FALSE	168	175	QQSIFDPG	Q*SIFDPG	Q169*	NA	NA	coding	stop	NA	NA
CAACAAAGTGCAAGCATAGT	neStops	+	chrXIII	171170	171192	YML052W	SUR7	769	791	FALSE	257	264	QQSASIVG	Q*SASIVG	Q258*	NA	NA	coding	stop	NA	NA
CAACAAATTAGGTCTTTATT	neStops	+	chrXV	827114	827136	YOR269W	PAC1	730	752	FALSE	244	251	QQIRSLLG	Q*IRSLLG	Q245*	NA	NA	coding	stop	NA	NA
CAACAACAACAGGGACAATC	neStops	+	chrIII	70918	70940	YCL028W	RNQ1	769	791	FALSE	257	264	QQQQGQSG	Q**QGQSG	Q258*	Q259*	NA	coding	stop	c(NA, NA)	NA
CAACAACAACCACCCCAGAG	neStops	+	chrII	270541	270563	YBR016W	YBR016W	295	317	FALSE	99	106	QQQPPQRG	Q**PPQRG	Q100*	Q101*	NA	coding	stop	c(NA, NA)	NA
CAACAACAGGACCAACCCAA	neStops	-	chrII	358293	358315	YBR059C	AKL1	1873	1895	FALSE	625	632	QQQDQPKG	Q**DQPKG	Q626*	Q627*	NA	coding	stop	c(NA, NA)	NA
CAACAACGAGGTGGAAGTAC	neStops	-	chrIV	742256	742278	YDR143C	SAN1	1597	1619	FALSE	533	540	QQRGGSTG	Q**GGSTG	Q534*	R535*	NA	coding	stop	c(NA, NA)	NA
CAACAACTGCAAGAAAACGA	neStops	+	chrXV	1010287	1010309	YOR358W	HAP5	127	149	FALSE	43	50	QQLQENEG	Q*LQENEG	Q44*	NA	NA	coding	stop	NA	NA
CAACAAGAACAGGAGAAGTC	neStops	+	chrVII	174686	174708	YGL174W	BUD13	142	164	FALSE	48	55	QQEQEKSG	Q*EQEKSG	Q49*	NA	NA	coding	stop	NA	NA
CAACAAGAAGCGTGGCAACA	neStops	+	chrVIII	173590	173612	YHR032W	ERC1	247	269	FALSE	83	90	QQEAWQQG	Q*EAWQQG	Q84*	NA	NA	coding	stop	NA	NA
CAACAAGCTCTTGAACTTCG	neStops	+	chrXII	89046	89068	YLL026W	HSP104	424	446	FALSE	142	149	QQALELRG	Q*VLELRG	Q143*	A144V	NA	coding	stop	c(NA, 1.396)	1.396
CAACAAGTTTCCTCTATAGG	neStops	+	chrVII	464618	464640	YGL016W	KAP122	2953	2975	FALSE	985	992	QQVSSIGG	Q*VSSIGG	Q986*	NA	NA	coding	stop	NA	NA
CAACAATCTACAGGTTTGTT	neStops	+	chrXI	311363	311385	YKL068W	NUP100	1165	1187	FALSE	389	396	QQSTGLFG	Q*FTGLFG	Q390*	S391F	NA	coding	stop	c(NA, -3.668)	3.668
CAACAGAAGATAAATCATCG	neStops	-	chrX	182422	182444	YJL127C	SPT10	1777	1799	FALSE	593	600	QQKINHRG	Q*KINHRG	Q594*	NA	NA	coding	stop	NA	NA
CAACAGACTAATAATACAAT	neStops	-	chrXVI	222004	222026	YPL174C	NIP100	748	770	FALSE	250	257	QQTNNTIG	Q*INNTIG	Q251*	T252I	NA	coding	stop	c(NA, -1.633)	1.633
CAACAGCAACAGACGAAGTT	neStops	+	chrXV	230433	230455	YOL053W	AIM39	349	371	FALSE	117	124	QQQQTKLG	Q**QTKLG	Q118*	Q119*	NA	coding	stop	c(NA, NA)	NA
CAACAGCTAATGGAGTTAGC	neStops	-	chrXIV	264347	264369	YNL200C	NNR1	85	107	FALSE	29	36	QQLMELAG	Q*LMELAG	Q30*	NA	NA	coding	stop	NA	NA
CAACAGCTTCTGTGTAAAGC	neStops	-	chrXV	154126	154148	YOL088C	MPD2	598	620	FALSE	200	207	QQLLCKAG	Q*FLCKAG	Q201*	L202F	NA	coding	stop	c(NA, -0.74)	0.74
CAACAGGAATCGAACCTTTG	neStops	-	chrXIII	844267	844289	YMR287C	DSS1	1057	1079	FALSE	353	360	QQESNLWG	Q*ESNLWG	Q354*	NA	NA	coding	stop	NA	NA
CAACAGTACCTGAGCTATAA	neStops	+	chrX	491234	491256	YJR032W	CPR7	154	176	FALSE	52	59	QQYLSYKG	Q*YLSYKG	Q53*	NA	NA	coding	stop	NA	NA
CAACAGTTTCGGGCCACGTA	neStops	+	chrXV	760298	760320	YOR223W	DSC3	517	539	FALSE	173	180	QQFRATYG	Q*FRATYG	Q174*	NA	NA	coding	stop	NA	NA
CAACATCAATCACTATATTC	neStops	-	chrXV	668731	668753	YOR178C	GAC1	1489	1511	FALSE	497	504	QHQSLYSG	QY*SLYSG	H498Y	Q499*	NA	coding	stop	c(-0.718, NA)	0.718
CAACCAAAAAACGATGTGCA	neStops	-	chrXV	641314	641336	YOR162C	YRR1	657	679	FALSE	219	227	NNQKTMCRE	NN*KTMCRE	Q221*	NA	NA	coding	stop	NA	NA
CAACCAAAAATTGGCTAAGC	neStops	-	chrXIII	549747	549769	YMR141C	YMR141C	276	298	FALSE	92	100	TNQKLAKLE	TN*KLAKLE	Q94*	NA	NA	coding	stop	NA	NA
CAACCAAACCAAGAAGTCTT	neStops	+	chrXVI	608934	608956	YPR023C	EAF3	1076	1098	FALSE	359	366	TEDFLVWL	TEDFLV*L	W365*	NA	NA	coding	stop	NA	NA
CAACCAAACCAATCCATATT	neStops	-	chrVII	242876	242898	YGL140C	YGL140C	2115	2137	FALSE	705	713	VNQTNPYLE	VN*TNPYLE	Q707*	NA	NA	coding	stop	NA	NA
CAACCAAATCACAAGAATAC	neStops	-	chrXV	517796	517818	YOR104W	PIN2	155	177	FALSE	52	59	ACILVIWL	ACILVI*L	W58*	NA	NA	coding	stop	NA	NA
CAACCAAGATATGATGCCGT	neStops	+	chrXI	65970	65992	YKL201C	MNN4	1475	1497	FALSE	492	499	ANGIISWL	ANGIIS*L	W498*	NA	NA	coding	stop	NA	NA
CAACCAATACCTTGGTTTCA	neStops	+	chrII	78027	78049	YBL079W	NUP170	2769	2791	FALSE	923	931	DNQYLGFKD	DN*YLGFKD	Q925*	NA	NA	coding	stop	NA	NA
CAACCAATGCAGAAGATTTC	neStops	-	chrVIII	500207	500229	YHR201C	PPX1	915	937	FALSE	305	313	VNQCRRFQA	VN*CRRFQA	Q307*	NA	NA	coding	stop	NA	NA
CAACCAGCTTGCTCAAGAAT	neStops	+	chrVII	906938	906960	YGR204W	ADE3	1005	1027	FALSE	335	343	INQLAQELG	IN*FAQELG	Q337*	L338F	NA	coding	stop	c(NA, -2.249)	2.249
CAACCAGGTGGTGTCAGGAT	neStops	-	chrIII	265144	265166	YCR088W	ABP1	77	99	FALSE	26	33	SDPDTTWL	SDPDTT*L	W32*	NA	NA	coding	stop	NA	NA
CAACCATGCCGTACCTCTAA	neStops	-	chrII	246123	246145	YBR005W	RCR1	218	240	FALSE	73	80	PIRGTAWL	PIRGTA*L	W79*	NA	NA	coding	stop	NA	NA
CAACCCCCAGGTGATGTCCT	neStops	-	chrXI	22754	22776	YKL217W	JEN1	521	543	FALSE	174	181	TKDITWGL	TKDIT*KL	W179*	G180K	NA	coding	stop	c(NA, -7.867)	7.867
CAACCGCAGCTAAAACCTGC	neStops	-	chrIV	339680	339702	YDL063C	SYO1	433	455	FALSE	145	152	QPQLKPAG	QL*LKPAG	P146L	Q147*	NA	coding	stop	c(-0.934, NA)	0.934
CAACCGTCAGCGTGTAGAAT	neStops	+	chrXIV	81026	81048	YNL293W	MSB3	387	409	FALSE	129	137	DNRQRVELE	DNC*RVELE	R131C	Q132*	NA	coding	stop	c(-1.608, NA)	1.608
CAACCTCAATACGGTGTAGC	neStops	-	chrXI	336889	336911	YKL054C	DEF1	1843	1865	FALSE	615	622	QPQYGVAG	QF*YGVAG	P616F	Q617*	NA	coding	stop	c(-10.533, NA)	10.533
CAACCTCAGGTAGATGGAAA	neStops	-	chrX	103263	103285	YJL168C	SET2	1144	1166	FALSE	382	389	QPQVDGKG	QF*VDGKG	P383F	Q384*	NA	coding	stop	c(-0.402, NA)	0.402
CAACGAATGGCGATTGCCAC	neStops	+	chrXIV	485050	485072	YNL076W	MKS1	1495	1517	FALSE	499	506	QRMAIATG	Q*MAIATG	R500*	NA	NA	coding	stop	NA	NA
CAACGACCCAAACATGGGCA	neStops	+	chrIII	145846	145868	YCR017C	CWH43	1767	1789	FALSE	589	597	VLAHVWVVA	VLAHV*IIA	W594*	V595I	V596I	coding	stop	c(NA, -0.849, -0.982)	0.982
CAACGATACGCCCACATTGG	neStops	-	chrIV	74465	74487	YDL214C	PRR2	2059	2081	FALSE	687	694	QRYAHIGG	Q*YAHIGG	R688*	NA	NA	coding	stop	NA	NA
CAACGATTTGGTGTCCCAAT	neStops	+	chrXIII	638505	638527	YMR189W	GCV2	1006	1028	FALSE	336	343	QRFGVPMG	Q*FGVPMG	R337*	NA	NA	coding	stop	NA	NA
CAACGCAATCTCAATATATC	neStops	+	chrIV	671648	671670	YDR108W	TRS85	380	402	FALSE	127	134	STQSQYIR	SM*SQYIR	T128M	Q129*	NA	coding	stop	c(-2.71, NA)	2.71
CAACGCTCAAAGCGCTAATA	neStops	-	chrXIV	439742	439764	YNL098C	RAS2	807	829	FALSE	269	277	ANAQSANTV	ANV*SANTV	A271V	Q272*	NA	coding	stop	c(-0.471, NA)	0.471
CAACGGTCAAATTATAGAAT	neStops	+	chrXI	548563	548585	YKR055W	RHO4	348	370	FALSE	116	124	PNGQIIELA	PNG*IIELA	Q119*	NA	NA	coding	stop	NA	NA
CAACTACAAGTCATTGAAAA	neStops	+	chrXV	465068	465090	YOR073W	SGO1	298	320	FALSE	100	107	QLQVIENG	QL*VIENG	Q102*	NA	NA	coding	stop	NA	NA
CAACTGCAGCAACTACAACC	neStops	-	chrIV	1192066	1192088	YDR359C	EAF1	2797	2819	FALSE	933	940	QLQQLQPG	QL*QLQPG	Q935*	NA	NA	coding	stop	NA	NA
CAACTTCAAATCATCAGGTT	neStops	+	chrV	541837	541859	YER176W	ECM32	148	170	FALSE	50	57	QLQIIRFG	QF*IIRFG	L51F	Q52*	NA	coding	stop	c(-3.393, NA)	3.393
CAACTTCAAGAGGTACTACA	neStops	+	chrXII	169505	169527	YLR011W	LOT6	403	425	FALSE	135	142	QLQEVLHG	QF*EVLHG	L136F	Q137*	NA	coding	stop	c(-3.99, NA)	3.99
CAAGAAGCAAGGTTCCGGCA	neStops	-	chrVII	508247	508269	YGR008C	STF2	96	118	FALSE	32	40	IKKQGSGKG	IKK*GSGKG	Q35*	NA	NA	coding	stop	NA	NA
CAAGAAGCAGCCTTCAATAT	neStops	-	chrXV	857972	857994	YOR290C	SNF2	2265	2287	FALSE	755	763	IKKQPSILV	IKK*PSILV	Q758*	NA	NA	coding	stop	NA	NA
CAAGACGAAAATCTATTATT	neStops	-	chrX	78117	78139	YJL187C	SWE1	1124	1146	FALSE	375	382	TRRKSIIG	TR*KSIIG	R377*	NA	NA	coding	stop	NA	NA
CAAGAGACGATGTTCATTCA	neStops	-	chrXII	438176	438198	YLR149C	YLR149C	1626	1648	FALSE	542	550	YKRRCSFRV	YKR*CSFRV	R545*	NA	NA	coding	stop	NA	NA
CAAGATCAAATGTCGACAAC	neStops	+	chrXIII	294773	294795	YMR012W	CLU1	3640	3662	FALSE	1214	1221	QDQMSTTG	QD*MSTTG	Q1216*	NA	NA	coding	stop	NA	NA
CAAGATGCAATATTCCACAC	neStops	+	chrXII	180452	180474	YLR019W	PSR2	165	187	FALSE	55	63	DKMQYSTPE	DKM*YSTPE	Q58*	NA	NA	coding	stop	NA	NA
CAAGATGCAGAAACCCACCT	neStops	-	chrXIII	896240	896262	YMR310C	YMR310C	408	430	FALSE	136	144	IKMQKPTLA	IKM*KPTLA	Q139*	NA	NA	coding	stop	NA	NA
CAAGCAAAATTTACCGAACC	neStops	-	chrXVI	76905	76927	YPL249C	GYP5	2427	2449	FALSE	809	817	RKQNLPNPD	RK*NLPNPD	Q811*	NA	NA	coding	stop	NA	NA
CAAGCAAACCGGTGTAGATC	neStops	+	chrII	721779	721801	YBR251W	MRPS5	390	412	FALSE	130	138	HKQTGVDPD	HK*TGVDPD	Q132*	NA	NA	coding	stop	NA	NA
CAAGCAAATAAATATATCTG	neStops	+	chrXV	166391	166413	YOL083W	ATG34	678	700	FALSE	226	234	IKQINISEE	IK*INISEE	Q228*	NA	NA	coding	stop	NA	NA
CAAGCAACACGCAAGAAGGA	neStops	+	chrIV	1413674	1413696	YDR477W	SNF1	1302	1324	FALSE	434	442	AKQHARRMA	AK*YARRMA	Q436*	H437Y	NA	coding	stop	c(NA, -1.042)	1.042
CAAGCAACCAGTGTCAAGAT	neStops	+	chrII	439233	439255	YBR097W	VPS15	2283	2305	FALSE	761	769	CKQPVSRSV	CK*SVSRSV	Q763*	P764S	NA	coding	stop	c(NA, -6.555)	6.555
CAAGCAACGTGGGAAAATGT	neStops	+	chrXIII	737486	737508	YMR232W	FUS2	561	583	FALSE	187	195	AKQRGKMLD	AK*CGKMLD	Q189*	R190C	NA	coding	stop	c(NA, -0.356)	0.356
CAAGCAAGGTTATCTTAAAA	neStops	+	chrIV	690296	690318	YDR119W	VBA4	2070	2092	FALSE	690	698	SKQGYLKKD	SK*GYLKKD	Q692*	NA	NA	coding	stop	NA	NA
CAAGCAGGACTTGAAGAAGT	neStops	+	chrIII	253135	253157	YCR079W	PTC6	291	313	FALSE	97	105	DKQDLKKLV	DK*DLKKLV	Q99*	NA	NA	coding	stop	NA	NA
CAAGCATCCAAAACTCCGAA	neStops	+	chrIII	161457	161479	YCR024C	SLM5	744	766	FALSE	248	256	HLSEFWMLE	HLSEF*ILE	W253*	M254I	NA	coding	stop	c(NA, -4)	4
CAAGCCATTGGGCGGCTAAT	neStops	+	chrVI	183577	183599	YFR018C	YFR018C	624	646	FALSE	208	216	RRLAAQWLA	RRLAAQ*LA	W214*	NA	NA	coding	stop	NA	NA
CAAGCCCAACAATTGGGTCT	neStops	+	chrVII	387794	387816	YGL062W	PYC1	2599	2621	FALSE	867	874	QAQQLGLG	QV*QLGLG	A868V	Q869*	NA	coding	stop	c(-3.64, NA)	3.64
CAAGCCCCCATATATCGATC	neStops	+	chrXIV	56895	56917	YNL307C	MCK1	657	679	FALSE	219	227	TQIDIWGLG	TQIDI*KLG	W224*	G225K	NA	coding	stop	c(NA, -4.262)	4.262
CAAGCGATTAACTGAAGAAG	neStops	-	chrVII	179936	179958	YGL173C	XRN1	156	178	FALSE	52	60	TKRLTEEEV	TK*LTEEEV	R54*	NA	NA	coding	stop	NA	NA
CAAGCGCAACAGCAAAGTGG	neStops	+	chrV	293863	293885	YER068W	MOT2	814	836	FALSE	272	279	QAQQQSGG	QV*QQSGG	A273V	Q274*	NA	coding	stop	c(-1.155, NA)	1.155
CAAGCGCAATTCGGTGGGTA	neStops	-	chrVII	914194	914216	YGR210C	YGR210C	523	545	FALSE	175	182	QAQFGGYG	QV*FGGYG	A176V	Q177*	NA	coding	stop	c(-2.363, NA)	2.363
CAAGCTCAACGTGACTACTT	neStops	+	chrVIII	472286	472308	YHR183W	GND1	1327	1349	FALSE	443	450	QAQRDYFG	QV*RDYFG	A444V	Q445*	NA	coding	stop	c(-3.844, NA)	3.844
CAAGCTGCAAAATGGATGGA	neStops	+	chrXV	480105	480127	YOR083W	WHI5	573	595	FALSE	191	199	VKLQNGWTD	VKL*NGWTD	Q194*	NA	NA	coding	stop	NA	NA
CAAGGCCACCTTAACTTTAC	neStops	+	chrXV	322969	322991	YOL003C	PFA4	4	26	FALSE	2	9	PVKLRWPW	PVKLR*PW	W7*	NA	NA	coding	stop	NA	NA
CAAGGGCCAAATTCTCACAC	neStops	-	chrXV	202254	202276	YOL067C	RTG1	243	265	FALSE	81	89	NKGQILTQA	NKG*ILTQA	Q84*	NA	NA	coding	stop	NA	NA
CAAGGTCAAGGACAAGGTCA	neStops	+	chrIII	70636	70658	YCL028W	RNQ1	487	509	FALSE	163	170	QGQGQGQG	QG*GQGQG	Q165*	NA	NA	coding	stop	NA	NA
CAAGGTCAAGGTCAAGGACA	neStops	+	chrIII	70630	70652	YCL028W	RNQ1	481	503	FALSE	161	168	QGQGQGQG	QG*GQGQG	Q163*	NA	NA	coding	stop	NA	NA
CAAGGTCCCACTCTTGTAGC	neStops	-	chrXIV	610189	610211	YNL012W	SPO1	420	442	FALSE	140	148	SLLQEWDLE	SLLQE*NLE	W145*	D146N	NA	coding	stop	c(NA, -0.711)	0.711
CAAGTAGCCAAGAATCCATT	neStops	+	chrVII	155244	155266	YGL184C	STR3	747	769	FALSE	249	257	SPMDSWLLV	SPMDS*LLV	W254*	NA	NA	coding	stop	NA	NA
CAAGTGCAGGTACACCCTAC	neStops	+	chrX	530689	530711	YJR051W	OSM1	829	851	FALSE	277	284	QVQVHPTG	QV*VHPTG	Q279*	NA	NA	coding	stop	NA	NA
CAAGTTACAGAACTTGAAGC	neStops	-	chrVII	249351	249373	YGL138C	YGL138C	159	181	FALSE	53	61	DKLQNLKQE	DKL*NLKQE	Q56*	NA	NA	coding	stop	NA	NA
CAAGTTCCAACAAGAATCAC	neStops	+	chrXIII	384418	384440	YMR054W	STV1	1116	1138	FALSE	372	380	NKFQQESQG	NKF*QESQG	Q375*	NA	NA	coding	stop	NA	NA
CAAGTTCCATACCTGGTGAA	neStops	+	chrXIII	785308	785330	YMR259C	TRM732	3554	3576	FALSE	1185	1192	TFHQVWNL	TFHQV*NL	W1190*	NA	NA	coding	stop	NA	NA
CAAGTTGCAAAGATTATGGT	neStops	-	chrX	664320	664342	YJR129C	EFM3	678	700	FALSE	226	234	IKLQRLWWG	IKL*RLWWG	Q229*	NA	NA	coding	stop	NA	NA
CAATACCAGTCCGGATCAAC	neStops	-	chrXIII	875296	875318	YMR304W	UBP15	310	332	FALSE	104	111	PVDPDWYC	PVDPD*YC	W109*	NA	NA	coding	stop	NA	NA
CAATACGCAGAAAATTCTAG	neStops	-	chrIV	510252	510274	YDR034C	LYS14	1836	1858	FALSE	612	620	FNTQKILVE	FNM*KILVE	T614M	Q615*	NA	coding	stop	c(0, NA)	0
CAATATTCCAGTCGATGAAA	neStops	-	chrXII	41112	41134	YLL049W	LDB18	447	469	FALSE	149	157	NRFIDWNIE	NRFID*NIE	W154*	NA	NA	coding	stop	NA	NA
CAATCAACATTATTCAACCC	neStops	-	chrVII	873681	873703	YGR188C	BUB1	1407	1429	FALSE	469	477	FNQHYSTPG	FN*YYSTPG	Q471*	H472Y	NA	coding	stop	c(NA, -2.7)	2.7
CAATCAAGGCCACTCTCAAA	neStops	-	chrIX	393105	393127	YIR019C	FLO11	549	571	FALSE	183	191	DNQGHSQTD	DN*GHSQTD	Q185*	NA	NA	coding	stop	NA	NA
CAATCAATATGAAAAGGACC	neStops	+	chrXIV	189316	189338	YNL243W	SLA2	1266	1288	FALSE	422	430	TNQYEKDQA	TN*YEKDQA	Q424*	NA	NA	coding	stop	NA	NA
CAATCAATGCGTCCTAATGA	neStops	-	chrXV	322682	322704	YOL003C	PFA4	291	313	FALSE	97	105	CNQCVLMMD	CN*CVLMMD	Q99*	NA	NA	coding	stop	NA	NA
CAATCAATTATTGACCCAAA	neStops	-	chrXI	71390	71412	YKL197C	PEX1	2454	2476	FALSE	818	826	VNQLLTQMD	VN*LLTQMD	Q820*	NA	NA	coding	stop	NA	NA
CAATCAGAGCAAGAGTAGCA	neStops	+	chrXII	87627	87649	YLL027W	ISA1	225	247	FALSE	75	83	SNQSKSSKA	SN*SKSSKA	Q77*	NA	NA	coding	stop	NA	NA
CAATCAGGAAACTGAGGAAA	neStops	-	chrXIV	271663	271685	YNL195C	YNL195C	624	646	FALSE	208	216	FNQETEEKE	FN*ETEEKE	Q210*	NA	NA	coding	stop	NA	NA
CAATCCCCACTTAACAATTG	neStops	+	chrIV	311035	311057	YDL080C	THI3	1415	1437	FALSE	472	479	STIVKWGL	STIVK*KL	W477*	G478K	NA	coding	stop	c(NA, -2.296)	2.296
CAATCGCAAAGCTTCATAGA	neStops	+	chrXIII	232556	232578	YML020W	YML020W	1408	1430	FALSE	470	477	QSQSFIEG	QL*SFIEG	S471L	Q472*	NA	coding	stop	c(-5.2, NA)	5.2
CAATCTCCATGCGATACGCG	neStops	-	chrX	547390	547412	YJR059W	PTK2	1604	1626	FALSE	535	542	ATRIAWRL	ATRIA*KL	W540*	R541K	NA	coding	stop	c(NA, -2.59)	2.59
CAATGCAAATTTCGGAAATG	neStops	-	chrXVI	662469	662491	YPR049C	ATG11	2183	2205	FALSE	728	735	SMQISEMG	SM*ISEMG	Q730*	NA	NA	coding	stop	NA	NA
CAATGCAAGGTGATGCTCTT	neStops	+	chrXVI	799448	799470	YPR135W	CTF4	215	237	FALSE	72	79	TMQGDALR	TM*GDALR	Q74*	NA	NA	coding	stop	NA	NA
CAATGCAATTATGTGAGAAA	neStops	+	chrV	134891	134913	YEL011W	GLC3	1772	1794	FALSE	591	598	SMQLCEKR	SM*LCEKR	Q593*	NA	NA	coding	stop	NA	NA
CAATGCCCAAGCTGAAGATT	neStops	+	chrXVI	304767	304789	YPL130W	SPO19	381	403	FALSE	127	135	FNAQAEDLG	FNV*AEDLG	A129V	Q130*	NA	coding	stop	c(-0.364, NA)	0.364
CAATGTCAAGAGGAAGTTAA	neStops	-	chrXVI	604938	604960	YPR022C	SDD4	2353	2375	FALSE	785	792	QCQEEVNG	QC*EEVNG	Q787*	NA	NA	coding	stop	NA	NA
CAATTACAAAATAACCACTG	neStops	+	chrXI	585435	585457	YKR078W	YKR078W	484	506	FALSE	162	169	QLQNNHWG	QL*NNHWG	Q164*	NA	NA	coding	stop	NA	NA
CAATTACAAACTTTCAAGGT	neStops	+	chrXVI	421713	421735	YPL070W	MUK1	766	788	FALSE	256	263	QLQTFKVG	QL*TFKVG	Q258*	NA	NA	coding	stop	NA	NA
CAATTCAAGACGAAAAGGTT	neStops	+	chrXIII	629737	629759	YMR185W	RTP1	713	735	FALSE	238	245	TIQDEKVR	TI*DEKVR	Q240*	NA	NA	coding	stop	NA	NA
CAATTCCACAGGCACTCCGC	neStops	+	chrXI	258765	258787	YKL097C	YKL097C	127	149	FALSE	43	50	PAECLWNC	PAECL*NC	W48*	NA	NA	coding	stop	NA	NA
CAATTGCAAAAAACCACTCT	neStops	-	chrII	294615	294637	YBR028C	YPK3	1366	1388	FALSE	456	463	QLQKTTLG	QL*KTTLG	Q458*	NA	NA	coding	stop	NA	NA
CAATTGCAAGCTGCTTCAAG	neStops	+	chrX	706383	706405	YJR148W	BAT2	640	662	FALSE	214	221	QLQAASRG	QL*AASRG	Q216*	NA	NA	coding	stop	NA	NA
CAATTGCAGAACAACCATTG	neStops	+	chrXV	454755	454777	YOR069W	VPS5	988	1010	FALSE	330	337	QLQNNHWG	QL*NNHWG	Q332*	NA	NA	coding	stop	NA	NA
CACAAACCAAGAATACCCAT	neStops	+	chrXII	516362	516384	YLR180W	SAM1	1101	1123	FALSE	367	375	FTNQEYPWE	FTN*EYPWE	Q370*	NA	NA	coding	stop	NA	NA
CACAAAGCCAGCTTACCAAA	neStops	-	chrXIII	285960	285982	YMR010W	ANY1	861	883	FALSE	287	295	ILLVSWLCG	ILLVS*LCG	W292*	NA	NA	coding	stop	NA	NA
CACAAATCAAGACAGTATTG	neStops	+	chrIX	419081	419103	YIR033W	MGA2	2958	2980	FALSE	986	994	TTNQDSIVE	TTN*DSIVE	Q989*	NA	NA	coding	stop	NA	NA
CACAAATCGACCCGATGCAG	neStops	+	chrVII	1029049	1029071	YGR270W	YTA7	1680	1702	FALSE	560	568	ATNRPDAVD	ATN*PDAVD	R563*	NA	NA	coding	stop	NA	NA
CACAACAAACAAAAGCTCCT	neStops	+	chrII	535486	535508	YBR146W	MRPS9	227	249	FALSE	76	83	AQQTKAPW	AQ*TKAPW	Q78*	NA	NA	coding	stop	NA	NA
CACAACAATTCTCCGGCATA	neStops	+	chrXIII	273149	273171	YMR003W	AIM34	32	54	FALSE	11	18	SQQFSGIR	SQ*FSGIR	Q13*	NA	NA	coding	stop	NA	NA
CACAACCCAGCTTTGCGAAC	neStops	-	chrVII	33825	33847	YGL249W	ZIP2	728	750	FALSE	243	250	TSSQSWVV	TSSQS*IV	W248*	V249I	NA	coding	stop	c(NA, -0.312)	0.312
CACAAGCCAAATTACGTCGG	neStops	+	chrI	54538	54560	YAL048C	GEM1	230	252	FALSE	77	84	SADVIWLV	SADVI*LV	W82*	NA	NA	coding	stop	NA	NA
CACAATCCAACGACCGTCCT	neStops	+	chrIX	314380	314402	YIL020C	HIS6	419	441	FALSE	140	147	TQDGRWIV	TQDGR*IV	W145*	NA	NA	coding	stop	NA	NA
CACACAAAAGAAAAAGAAAC	neStops	-	chrVIII	112332	112354	YHR004C	NEM1	741	763	FALSE	247	255	NTQKKKKLV	NT*KKKKLV	Q249*	NA	NA	coding	stop	NA	NA
CACACAAGGTAACTACGGTC	neStops	+	chrXV	821760	821782	YOR266W	PNT1	738	760	FALSE	246	254	STQGNYGLG	ST*GNYGLG	Q248*	NA	NA	coding	stop	NA	NA
CACACACAAAAGAGTCTTGC	neStops	+	chrII	111002	111024	YBL059W	YBL059W	340	362	FALSE	114	121	HTQKSLAG	HI*KSLAG	T115I	Q116*	NA	coding	stop	c(-0.797, NA)	0.797
CACACACCACAACAAAATAG	neStops	-	chrX	62870	62892	YJL198W	PHO90	2027	2049	FALSE	676	683	ATILLWCV	ATILL*YV	W681*	C682Y	NA	coding	stop	c(NA, -10.967)	10.967
CACACAGCGCCAAAGACAAA	neStops	-	chrII	581965	581987	YBR173C	UMP1	186	208	FALSE	62	70	TTQRQRQME	TT*CQRQME	Q64*	R65C	NA	coding	stop	c(NA, -4.311)	4.311
CACACAGGCAAAAAAGCACA	neStops	+	chrVIII	481277	481299	YHR187W	IKI1	288	310	FALSE	96	104	ATQAKKHMV	AT*AKKHMV	Q98*	NA	NA	coding	stop	NA	NA
CACACAGTCGGGACGCATCA	neStops	-	chrX	467297	467319	YJR019C	TES1	963	985	FALSE	321	329	DTQSGRIMA	DT*SGRIMA	Q323*	NA	NA	coding	stop	NA	NA
CACACCAAAAGAAACTTAGG	neStops	+	chrIX	31930	31952	YIL166C	YIL166C	615	637	FALSE	205	213	FRLSFFWCA	FRLSFF*CA	W211*	NA	NA	coding	stop	NA	NA
CACAGATCAGAGAAAAACTT	neStops	+	chrXII	558512	558534	YLR207W	HRD3	1725	1747	FALSE	575	583	TTDQRKTLA	TTD*RKTLA	Q578*	NA	NA	coding	stop	NA	NA
CACATCCATTCTTGCTTCAA	neStops	+	chrXII	232970	232992	YLR044C	PDC1	1090	1112	FALSE	364	371	PLKQEWMW	PLKQE*MW	W369*	NA	NA	coding	stop	NA	NA
CACATCCCACCAGCCAGGCC	neStops	-	chrIV	707053	707075	YDR127W	ARO1	2570	2592	FALSE	857	864	TWPGWWDV	TWPGW*NV	W862*	D863N	NA	coding	stop	c(NA, -4.997)	4.997
CACCAAAAGCTGACGGTCCC	neStops	+	chrVIII	307234	307256	YHR099W	TRA1	4474	4496	FALSE	1492	1499	HQKLTVPG	H*KLTVPG	Q1493*	NA	NA	coding	stop	NA	NA
CACCAAAATCAGCCCCACGA	neStops	+	chrVII	373917	373939	YGL071W	AFT1	1906	1928	FALSE	636	643	HQNQPHDG	H*NQPHDG	Q637*	NA	NA	coding	stop	NA	NA
CACCAAAGTCAACATTATAA	neStops	+	chrV	144552	144574	YEL006W	YEA6	226	248	FALSE	76	83	HQSQHYKG	H*SQHYKG	Q77*	NA	NA	coding	stop	NA	NA
CACCAACAAAAGTTGCAACA	neStops	+	chrXI	366550	366572	YKL038W	RGT1	946	968	FALSE	316	323	HQQKLQQG	H**KLQQG	Q317*	Q318*	NA	coding	stop	c(NA, NA)	NA
CACCAACAAATCGCTGATAT	neStops	-	chrX	680272	680294	YJR137C	MET5	2992	3014	FALSE	998	1005	HQQIADMG	H**IADMG	Q999*	Q1000*	NA	coding	stop	c(NA, NA)	NA
CACCAACAGGGCTCTCCTTC	neStops	+	chrVII	494766	494788	YGL002W	ERP6	250	272	FALSE	84	91	HQQGSPSG	H**GSPSG	Q85*	Q86*	NA	coding	stop	c(NA, NA)	NA
CACCAAGCAGTAGATGGCAC	neStops	-	chrXI	343225	343247	YKL050C	YKL050C	2374	2396	FALSE	792	799	HQAVDGTG	H*VVDGTG	Q793*	A794V	NA	coding	stop	c(NA, -0.968)	0.968
CACCACAACCCAAACCAAAG	neStops	-	chrVI	45285	45307	YFL044C	OTU1	254	276	FALSE	85	92	PPQPKPKR	PL*PKPKR	P86L	Q87*	NA	coding	stop	c(-0.801, NA)	0.801
CACCACAAGATGCCGAAGGT	neStops	-	chrXV	92302	92324	YOL121C	RPS19A	137	159	FALSE	46	53	PPQDAEGW	PL*DAEGW	P47L	Q48*	NA	coding	stop	c(-9.933, NA)	9.933
CACCACTCGTTATCCAATAG	neStops	-	chrVII	714198	714220	YGR110W	CLD1	490	512	FALSE	164	171	PLLDNEWC	PLLDNK*C	E169K	W170*	NA	coding	stop	c(-0.583, NA)	0.583
CACCAGAAATTTGACGCTAA	neStops	+	chrX	362221	362243	YJL042W	MHP1	973	995	FALSE	325	332	HQKFDAKG	H*KFDAKG	Q326*	NA	NA	coding	stop	NA	NA
CACCAGAACCATTCTGCATT	neStops	-	chrIV	953388	953410	YDR245W	MNN10	589	611	FALSE	197	204	PNAEWFWW	PNAEWF*W	W203*	NA	NA	coding	stop	NA	NA
CACCAGTTAGCTCCTATAAT	neStops	-	chrXIII	203334	203356	YML038C	YMD8	748	770	FALSE	250	257	HQLAPIMG	H*LAPIMG	Q251*	NA	NA	coding	stop	NA	NA
CACCATCTGTTCAATAAGTG	neStops	+	chrIV	318487	318509	YDL077C	VAM6	1612	1634	FALSE	538	545	PHLLNRWC	PHLLNK*C	R543K	W544*	NA	coding	stop	c(0.942, NA)	0.942
CACCATTCATTAACAGTATA	neStops	-	chrIV	948031	948053	YDR242W	AMD2	1225	1247	FALSE	409	416	PYTVNEWW	PYTVNK*W	E414K	W415*	NA	coding	stop	c(-2.693, NA)	2.693
CACCCAAAATATAAAAGAAG	neStops	-	chrXII	849613	849635	YLR361C-A	YLR361C-A	45	67	FALSE	15	23	RTQNIKEVE	RT*NIKEVE	Q17*	NA	NA	coding	stop	NA	NA
CACCCAAATTGTCAACTTGG	neStops	-	chrXIII	63412	63434	YML103C	NUP188	4116	4138	FALSE	1372	1380	TTQIVNLED	TT*IVNLED	Q1374*	NA	NA	coding	stop	NA	NA
CACCCAACCCAGACCGGGAG	neStops	-	chrXIII	771765	771787	YMR250W	GAD1	965	987	FALSE	322	329	TTPGLGWV	TTPGLD*V	G327D	W328*	NA	coding	stop	c(-6.983, NA)	6.983
CACCCAACGTAGGATAATTT	neStops	-	chrIV	240980	241002	YDL124W	YDL124W	722	744	FALSE	241	248	AQIILRWV	AQIILH*V	R246H	W247*	NA	coding	stop	c(-3.578, NA)	3.578
CACCCAATAGAATCTGTTCA	neStops	-	chrXIII	170511	170533	YML052W	SUR7	110	132	FALSE	37	44	PVNRFYWV	PVNRFY*V	W43*	NA	NA	coding	stop	NA	NA
CACCCAGTTGTCCGAGTTGA	neStops	-	chrXIV	651037	651059	YNR013C	PHO91	654	676	FALSE	218	226	YTQLSELKD	YT*LSELKD	Q220*	NA	NA	coding	stop	NA	NA
CACCGCTCAAACAATCAATG	neStops	+	chrXVI	484546	484568	YPL036W	PMA2	1704	1726	FALSE	568	576	DTAQTINEA	DTV*TINEA	A570V	Q571*	NA	coding	stop	c(-3.25, NA)	3.25
CACCGGCCAGCCGTAAGCGT	neStops	+	chrIV	265495	265517	YDL109C	YDL109C	1685	1707	FALSE	562	569	SNAYGWPV	SNAYG*PV	W567*	NA	NA	coding	stop	NA	NA
CACCTCAGTATATGCCGATA	neStops	+	chrX	225230	225252	YJL105W	SET4	176	198	FALSE	59	66	SPQYMPIR	SL*YMPIR	P60L	Q61*	NA	coding	stop	c(-0.922, NA)	0.922
CACCTCCCAAGTGGAAACAT	neStops	-	chrXV	363483	363505	YOR017W	PET127	2072	2094	FALSE	691	698	SDVSTWEV	SDVST*KV	W696*	E697K	NA	coding	stop	c(NA, 1.041)	1.041
CACCTCGAAAGGAACCAATG	neStops	+	chrXIV	213012	213034	YNL233W	BNI4	1091	1113	FALSE	364	371	SPRKEPMR	SL*KEPMR	P365L	R366*	NA	coding	stop	c(-1.556, NA)	1.556
CACGCAAACAAAGAGCACCC	neStops	+	chrX	336551	336573	YJL053W	PEP8	654	676	FALSE	218	226	NTQTKSTQG	NT*TKSTQG	Q220*	NA	NA	coding	stop	NA	NA
CACGCGAGATGCTATTAACG	neStops	-	chrVII	27142	27164	YGL252C	RTG2	321	343	FALSE	107	115	ATRDAINAD	AT*DAINAD	R109*	NA	NA	coding	stop	NA	NA
CACTAAGCAACCAAGGGTGG	neStops	-	chrIV	162185	162207	YDL167C	NRP1	948	970	FALSE	316	324	NTKQPRVVE	NTK*PRVVE	Q319*	NA	NA	coding	stop	NA	NA
CACTAAGCAGAACATTCCTA	neStops	+	chrV	127459	127481	YEL015W	EDC3	831	853	FALSE	277	285	NTKQNIPMA	NTK*NIPMA	Q280*	NA	NA	coding	stop	NA	NA
CACTAATCAAGAGTACTCAT	neStops	-	chrIV	1453336	1453358	YDR502C	SAM2	1107	1129	FALSE	369	377	FTNQEYSWE	FTN*EYSWE	Q372*	NA	NA	coding	stop	NA	NA
CACTACCCAAGATAAACAAG	neStops	-	chrXII	803591	803613	YLR337C	VRP1	1494	1516	FALSE	498	506	YTTQDKQED	YTI*DKQED	T500I	Q501*	NA	coding	stop	c(-4.562, NA)	4.562
CACTAGGCAAATACTGATTG	neStops	+	chrXII	851542	851564	YLR362W	STE11	1677	1699	FALSE	559	567	FTRQILIGV	FTR*ILIGV	Q562*	NA	NA	coding	stop	NA	NA
CACTATCAAGATATGCAGAA	neStops	-	chrIV	959270	959292	YDR249C	YDR249C	511	533	FALSE	171	178	HYQDMQNG	HY*DMQNG	Q173*	NA	NA	coding	stop	NA	NA
CACTATCCAGCAAATTCGTT	neStops	+	chrIV	848652	848674	YDR195W	REF2	54	76	FALSE	18	26	STIQQIRLD	STI*QIRLD	Q21*	NA	NA	coding	stop	NA	NA
CACTCAAACGTCTACACCCA	neStops	+	chrXIII	244361	244383	YML013W	UBX2	213	235	FALSE	71	79	PTQTSTPMA	PT*TSTPMA	Q73*	NA	NA	coding	stop	NA	NA
CACTCAAAGCGAAGAGTCAC	neStops	-	chrXIV	445997	446019	YNL095C	YNL095C	822	844	FALSE	274	282	CTQSEESQA	CT*SEESQA	Q276*	NA	NA	coding	stop	NA	NA
CACTCAACAAAAGAAAGCAA	neStops	-	chrIX	318826	318848	YIL017C	VID28	2118	2140	FALSE	706	714	DTQQKKAME	DT**KKAME	Q708*	Q709*	NA	coding	stop	c(NA, NA)	NA
CACTCAACTACAAACTACAA	neStops	+	chrIV	775179	775201	YDR159W	SAC3	3303	3325	FALSE	1101	1109	STQLQTTKD	ST*LQTTKD	Q1103*	NA	NA	coding	stop	NA	NA
CACTCACAATTGGGCAAATT	neStops	+	chrXV	455526	455548	YOR069W	VPS5	1759	1781	FALSE	587	594	HSQLGKLG	HL*LGKLG	S588L	Q589*	NA	coding	stop	c(-1.711, NA)	1.711
CACTCAGAACTCGCTTGGGT	neStops	+	chrXII	955195	955217	YLR417W	VPS36	186	208	FALSE	62	70	PTQNSLGLE	PT*NSLGLE	Q64*	NA	NA	coding	stop	NA	NA
CACTCCAATTCGGAAATTCG	neStops	+	chrX	441644	441666	YJR003C	MRX12	888	910	FALSE	296	304	SLEFPNWSV	SLEFPN*SV	W302*	NA	NA	coding	stop	NA	NA
CACTCCAGCATTGCGTAGAA	neStops	-	chrIX	417827	417849	YIR033W	MGA2	1704	1726	FALSE	568	576	ALSTQCWSE	ALSTQC*SE	W574*	NA	NA	coding	stop	NA	NA
CACTGGCAAGCATCCATCAT	neStops	-	chrII	406956	406978	YBR082C	UBC4	97	119	FALSE	33	40	HWQASIMG	HW*ASIMG	Q35*	NA	NA	coding	stop	NA	NA
CACTGGCAATTAGACTCCAA	neStops	-	chrVII	797681	797703	YGR154C	GTO1	166	188	FALSE	56	63	HWQLDSKG	HW*LDSKG	Q58*	NA	NA	coding	stop	NA	NA
CACTTCCAGATAATATCTCT	neStops	-	chrIV	1460155	1460177	YDR506C	GMC1	1378	1400	FALSE	460	467	HFQIISLG	HF*IISLG	Q462*	NA	NA	coding	stop	NA	NA
CACTTCCAGTTGAAAGTCTT	neStops	+	chrX	80827	80849	YJL186W	MNN5	673	695	FALSE	225	232	HFQLKVFG	HF*LKVFG	Q227*	NA	NA	coding	stop	NA	NA
CACTTCTCAAAACACTTCAG	neStops	-	chrIV	1383116	1383138	YDR459C	PFA5	306	328	FALSE	102	110	NTSQNTSVE	NTF*NTSVE	S104F	Q105*	NA	coding	stop	c(-1.64, NA)	1.64
CACTTGTCCAGACGAATCTA	neStops	+	chrXIII	593441	593463	YMR166C	MME1	1011	1033	FALSE	337	345	GPRFVWTSV	GPRFV*TSV	W342*	NA	NA	coding	stop	NA	NA
CACTTTCCGAAGACCTGATG	neStops	-	chrXII	26391	26413	YLL057C	JLP1	582	604	FALSE	194	202	ITFRRPDAE	ITF*RPDAE	R197*	NA	NA	coding	stop	NA	NA
CAGAACAAAAAAGTGATGGG	neStops	+	chrVIII	454377	454399	YHR176W	FMO1	149	171	FALSE	50	57	PEQKSDGR	PE*KSDGR	Q52*	NA	NA	coding	stop	NA	NA
CAGAACCAATGCGCCGGAAC	neStops	-	chrXV	1043437	1043459	YOR376W	YOR376W	247	269	FALSE	83	90	PVPAHWFC	PVPAH*FC	W88*	NA	NA	coding	stop	NA	NA
CAGAACCATGGCAAAGCAAC	neStops	-	chrXI	284051	284073	YKL081W	TEF4	835	857	FALSE	279	286	PVALPWFW	PVALP*FW	W284*	NA	NA	coding	stop	NA	NA
CAGAACCCACACGGGAACTT	neStops	+	chrII	797164	797186	YBR296C	PHO89	1337	1359	FALSE	446	453	SEVPVWVL	SEVPV*IL	W451*	V452I	NA	coding	stop	c(NA, -0.325)	0.325
CAGACAAATAAAATATGAAT	neStops	+	chrIV	414516	414538	YDL021W	GPM2	564	586	FALSE	188	196	NRQIKYELE	NR*IKYELE	Q190*	NA	NA	coding	stop	NA	NA
CAGACAACAATCGAAAAAGC	neStops	+	chrIV	581283	581305	YDR065W	RRG1	597	619	FALSE	199	207	GRQQSKKLG	GR**SKKLG	Q201*	Q202*	NA	coding	stop	c(NA, NA)	NA
CAGACAAGAGCCGAGATTAA	neStops	-	chrVII	242432	242454	YGL140C	YGL140C	2559	2581	FALSE	853	861	TRQEPRLKG	TR*EPRLKG	Q855*	NA	NA	coding	stop	NA	NA
CAGACCAGATTGTTCATAAA	neStops	-	chrXIII	815855	815877	YMR275C	BUL1	2705	2727	FALSE	902	909	TDQIVHKW	TD*IVHKW	Q904*	NA	NA	coding	stop	NA	NA
CAGACTCAAAAAATGCTCAT	neStops	-	chrXI	117277	117299	YKL176C	LST4	688	710	FALSE	230	237	QTQKMLIG	QI*KMLIG	T231I	Q232*	NA	coding	stop	c(-0.35, NA)	0.35
CAGAGCAGCGGTTAAAAGAT	neStops	-	chrXV	336999	337021	YOR005C	DNL4	323	345	FALSE	108	115	TEQRLKDW	TE*RLKDW	Q110*	NA	NA	coding	stop	NA	NA
CAGAGTCCACGACCATTCTG	neStops	-	chrVII	561001	561023	YGR038W	ORM1	320	342	FALSE	107	114	TTEWSWTL	TTEWS*TL	W112*	NA	NA	coding	stop	NA	NA
CAGATCCAAAGCGCAAGTGA	neStops	-	chrI	114652	114674	YAL019W-A	YAL019W-A	403	425	FALSE	135	142	PSLALWIC	PSLAL*IC	W140*	NA	NA	coding	stop	NA	NA
CAGATGTCAAGTACTAGAAA	neStops	+	chrXV	788137	788159	YOR241W	MET7	1143	1165	FALSE	381	389	GRCQVLEKG	GRC*VLEKG	Q384*	NA	NA	coding	stop	NA	NA
CAGCAAAAAAAATCCCAATT	neStops	-	chrII	404011	404033	YBR081C	SPT7	1219	1241	FALSE	407	414	QQKKSQLG	Q*KKSQLG	Q408*	NA	NA	coding	stop	NA	NA
CAGCAAACACAAGTACTGAA	neStops	-	chrII	697265	697287	YBR238C	YBR238C	16	38	FALSE	6	13	QQTQVLKG	Q*IQVLKG	Q7*	T8I	NA	coding	stop	c(NA, -2.007)	2.007
CAGCAAAGCAGAAACAGTTC	neStops	+	chrXIII	439580	439602	YMR086W	SEG1	373	395	FALSE	125	132	QQSRNSSG	Q*SRNSSG	Q126*	NA	NA	coding	stop	NA	NA
CAGCAACAGGCTAATGAGTA	neStops	+	chrIII	71194	71216	YCL028W	RNQ1	1045	1067	FALSE	349	356	QQQANEYG	Q**ANEYG	Q350*	Q351*	NA	coding	stop	c(NA, NA)	NA
CAGCAACCACAACAACAGCT	neStops	+	chrVII	1043393	1043415	YGR275W	RTT102	118	140	FALSE	40	47	QQPQQQLG	Q*LQQQLG	Q41*	P42L	NA	coding	stop	c(NA, -1.9)	1.9
CAGCAAGAGCAGCTATTGAT	neStops	+	chrIX	364253	364275	YIR004W	DJP1	1033	1055	FALSE	345	352	QQEQLLMG	Q*EQLLMG	Q346*	NA	NA	coding	stop	NA	NA
CAGCAAGAGCTTATAGATAC	neStops	+	chrIV	697139	697161	YDR122W	KIN1	2440	2462	FALSE	814	821	QQELIDTG	Q*ELIDTG	Q815*	NA	NA	coding	stop	NA	NA
CAGCAAGCACGACATCGGGA	neStops	-	chrIV	749379	749401	YDR146C	SWI5	1342	1364	FALSE	448	455	QQARHREG	Q*VRHREG	Q449*	A450V	NA	coding	stop	c(NA, -0.455)	0.455
CAGCAAGCAGAGTCGGCAGG	neStops	+	chrX	528748	528770	YJR050W	ISY1	52	74	FALSE	18	25	QQAESAGG	Q*VESAGG	Q19*	A20V	NA	coding	stop	c(NA, -3.867)	3.867
CAGCAAGGGTCCGGGCTGTT	neStops	+	chrXI	311219	311241	YKL068W	NUP100	1021	1043	FALSE	341	348	QQGSGLFG	Q*GSGLFG	Q342*	NA	NA	coding	stop	NA	NA
CAGCAATGTCAGACGCTTGA	neStops	-	chrIV	47667	47689	YDL227C	HO	343	365	FALSE	115	122	QQCQTLDG	Q*CQTLDG	Q116*	NA	NA	coding	stop	NA	NA
CAGCACAGCTTATTATCAGT	neStops	+	chrIV	1214640	1214662	YDR368W	YPR1	737	759	FALSE	246	253	PAQLIISW	PV*LIISW	A247V	Q248*	NA	coding	stop	c(-3.636, NA)	3.636
CAGCACCAAACTTATGGATT	neStops	+	chrXV	1008016	1008038	YOR356W	CIR2	796	818	FALSE	266	273	QHQTYGLG	QY*TYGLG	H267Y	Q268*	NA	coding	stop	c(-1.891, NA)	1.891
CAGCAGCCCACCATGCAAAA	neStops	-	chrII	775749	775771	YBR286W	APE3	1050	1072	FALSE	350	358	VRFAWWAAE	VRFAW*TTE	W355*	A356T	A357T	coding	stop	c(NA, -2.679, -4)	4
CAGCAGGCATTACAAACTAC	neStops	-	chrXV	139612	139634	YOL095C	HMI1	1714	1736	FALSE	572	579	QQALQTTG	Q*VLQTTG	Q573*	A574V	NA	coding	stop	c(NA, -1.443)	1.443
CAGCAGGGATATAACCAACA	neStops	+	chrII	270496	270518	YBR016W	YBR016W	250	272	FALSE	84	91	QQGYNQQG	Q*GYNQQG	Q85*	NA	NA	coding	stop	NA	NA
CAGCAGTCAAACAGTATATG	neStops	-	chrXVI	65278	65300	YPL256C	CLN2	1315	1337	FALSE	439	446	QQSNSICG	Q*LNSICG	Q440*	S441L	NA	coding	stop	c(NA, -1.75)	1.75
CAGCAGTTGTACAACCTTAA	neStops	-	chrII	122997	123019	YBL051C	PIN4	1741	1763	FALSE	581	588	QQLYNLNG	Q*LYNLNG	Q582*	NA	NA	coding	stop	NA	NA
CAGCATACAGAAGAAAGTCG	neStops	-	chrXV	745907	745929	YOR214C	SPR2	375	397	FALSE	125	133	DSIQKKVGA	DSI*KKVGA	Q128*	NA	NA	coding	stop	NA	NA
CAGCCAACAAAATACTGTAA	neStops	+	chrXV	1011800	1011822	YOR359W	VTS1	612	634	FALSE	204	212	SSQQNTVMD	SS**NTVMD	Q206*	Q207*	NA	coding	stop	c(NA, NA)	NA
CAGCCAATTGACCACCGCCT	neStops	+	chrIII	106803	106825	YCL008C	STP22	29	51	FALSE	10	17	PEAVVNWL	PEAVVN*L	W16*	NA	NA	coding	stop	NA	NA
CAGCCACAGTCTAATCTAGG	neStops	-	chrXVI	128924	128946	YPL223C	GRE1	193	215	FALSE	65	72	QPQSNLGG	QL*SNLGG	P66L	Q67*	NA	coding	stop	c(-9.412, NA)	9.412
CAGCCACCATGTGGGGCCGC	neStops	-	chrXI	529586	529608	YKR050W	TRK2	1772	1794	FALSE	591	598	PSGPTWWL	PSGPT**L	W596*	W597*	NA	coding	stop	c(NA, NA)	NA
CAGCCACTTGATGAATTCAT	neStops	+	chrXII	66225	66247	YLL038C	ENT4	272	294	FALSE	91	98	SNEFIKWL	SNEFIK*L	W97*	NA	NA	coding	stop	NA	NA
CAGCCAGATCCCTGGCGTGT	neStops	+	chrXI	524730	524752	YKR046C	PET10	323	345	FALSE	108	115	SNTPGIWL	SNTPGI*L	W114*	NA	NA	coding	stop	NA	NA
CAGCCAGATGTGTAGTGATG	neStops	-	chrXII	35956	35978	YLL052C	AQY2	384	406	FALSE	128	136	TSQMCSDVV	TS*MCSDVV	Q130*	NA	NA	coding	stop	NA	NA
CAGCCAGCATCCACATGACG	neStops	-	chrXIII	497326	497348	YMR114C	YMR114C	102	124	FALSE	34	42	NSQHPHDEE	NS*YPHDEE	Q36*	H37Y	NA	coding	stop	c(NA, -0.691)	0.691
CAGCCAGTACTTGCCGGCAT	neStops	+	chrII	735126	735148	YBR261C	TAE1	383	405	FALSE	128	135	PDAGKYWL	PDAGKY*L	W134*	NA	NA	coding	stop	NA	NA
CAGCCCAGTATGTAAACACG	neStops	+	chrXVI	681397	681419	YPR066W	UBA3	185	207	FALSE	62	69	AAQYVNTR	AV*YVNTR	A63V	Q64*	NA	coding	stop	c(-3.633, NA)	3.633
CAGCCCCAGGTATGTTTATT	neStops	+	chrIII	145365	145387	YCR017C	CWH43	2248	2270	FALSE	750	757	PNKHTWGC	PNKHT*NC	W755*	G756N	NA	coding	stop	c(NA, -5.994)	5.994
CAGCCTCAAAACGGTAGTGC	neStops	+	chrXIV	116316	116338	YNL278W	CAF120	3046	3068	FALSE	1016	1023	QPQNGSAG	QF*NGSAG	P1017F	Q1018*	NA	coding	stop	c(-2.844, NA)	2.844
CAGCCTCCCACGGGTCTATT	neStops	+	chrX	636277	636299	YJR111C	PXP2	408	430	FALSE	136	144	DPIDPWEAA	DPIDP*KTA	W141*	E142K	A143T	coding	stop	c(NA, -0.395, -0.556)	0.556
CAGCGAAAACATGCTACCTT	neStops	+	chrXV	775954	775976	YOR233W	KIN4	109	131	FALSE	37	44	QRKHATFG	Q*KHATFG	R38*	NA	NA	coding	stop	NA	NA
CAGCGATTAATGTTTCCTGA	neStops	-	chrXV	135309	135331	YOL098C	SDD3	508	530	FALSE	170	177	QRLMFPEG	Q*LMFPEG	R171*	NA	NA	coding	stop	NA	NA
CAGGAACCAAAAGGGTGCAA	neStops	-	chrVII	643258	643280	YGR081C	SLX9	501	523	FALSE	167	175	IRNQKGAKA	IRN*KGAKA	Q170*	NA	NA	coding	stop	NA	NA
CAGGAGCAATTAAGCGCTCA	neStops	+	chrIII	51432	51454	YCL040W	GLK1	595	617	FALSE	199	206	QEQLSAQG	QE*LSAQG	Q201*	NA	NA	coding	stop	NA	NA
CAGGAGCAGGATGACAAGAT	neStops	-	chrXI	526486	526508	YKR048C	NAP1	133	155	FALSE	45	52	QEQDDKIG	QE*DDKIG	Q47*	NA	NA	coding	stop	NA	NA
CAGGCAAAACCATAGGCGCA	neStops	-	chrXV	338525	338547	YOR006C	TSR3	75	97	FALSE	25	33	SRQNHRRME	SR*NHRRME	Q27*	NA	NA	coding	stop	NA	NA
CAGGCAAATGGGTAAGGTAT	neStops	-	chrIII	243553	243575	YCR073C	SSK22	3009	3031	FALSE	1003	1011	PRQMGKVLD	PR*MGKVLD	Q1005*	NA	NA	coding	stop	NA	NA
CAGGCAACAACAGGTGCTAC	neStops	-	chrXIII	478573	478595	YMR106C	YKU80	1596	1618	FALSE	532	540	YRQQQVLLE	YR**QVLLE	Q534*	Q535*	NA	coding	stop	c(NA, NA)	NA
CAGGCCAAGAAAAATTTGGC	neStops	-	chrXV	681876	681898	YOR185C	GSP2	209	231	FALSE	70	77	AGQEKFGG	AG*EKFGG	Q72*	NA	NA	coding	stop	NA	NA
CAGGCCAGTACTTGCAGGTT	neStops	-	chrXV	136255	136277	YOL097W-A	YOL097W-A	36	58	FALSE	12	20	NLTCKYWPV	NLTCKY*PV	W18*	NA	NA	coding	stop	NA	NA
CAGGCCTCGAAAGCTGGGGA	neStops	-	chrII	325732	325754	YBR044C	TCM62	306	328	FALSE	102	110	NRPRKLGRV	NRF*KLGRV	P104F	R105*	NA	coding	stop	c(-1.156, NA)	1.156
CAGGCGAAGTTTGTCTTATT	neStops	+	chrXIII	80376	80398	YML096W	YML096W	468	490	FALSE	156	164	GRRSLSYSV	GR*SLSYSV	R158*	NA	NA	coding	stop	NA	NA
CAGGCGCAACGCCAACAAGC	neStops	+	chrXIV	481640	481662	YNL077W	APJ1	250	272	FALSE	84	91	QAQRQQAG	QV*RQQAG	A85V	Q86*	NA	coding	stop	c(-0.652, NA)	0.652
CAGGCGCGAACACAGCCTGT	neStops	+	chrXVI	628588	628610	YPR030W	CSR2	709	731	FALSE	237	244	QARTQPVG	QV*TQPVG	A238V	R239*	NA	coding	stop	c(-0.967, NA)	0.967
CAGGGACAATCTCGAATAGA	neStops	+	chrIV	172589	172611	YDL159W	STE7	109	131	FALSE	37	44	QGQSRIEG	QG*SRIEG	Q39*	NA	NA	coding	stop	NA	NA
CAGGTACAAATCAAAGACAG	neStops	+	chrXI	127961	127983	YKL171W	NNK1	487	509	FALSE	163	170	QVQIKDSG	QV*IKDSG	Q165*	NA	NA	coding	stop	NA	NA
CAGGTACAGAGTGCTGAAAG	neStops	-	chrXII	871327	871349	YLR373C	VID22	19	41	FALSE	7	14	QVQSAERG	QV*SAERG	Q9*	NA	NA	coding	stop	NA	NA
CAGGTACCATTTATAAACAT	neStops	+	chrVIII	29841	29863	YHL035C	VMR1	2894	2916	FALSE	965	972	PDVYKWYL	PDVYK*YL	W970*	NA	NA	coding	stop	NA	NA
CAGGTCCCAAAATCTTCAGA	neStops	+	chrIV	1508856	1508878	YDR536W	STL1	852	874	FALSE	284	292	GRSQNLQRA	GRF*NLQRA	S286F	Q287*	NA	coding	stop	c(-3.058, NA)	3.058
CAGGTGCAAGATCACGAAGG	neStops	+	chrIV	136241	136263	YDL180W	YDL180W	346	368	FALSE	116	123	QVQDHEGG	QV*DHEGG	Q118*	NA	NA	coding	stop	NA	NA
CAGGTTCAAGCTAACACACT	neStops	-	chrXVI	216088	216110	YPL176C	TRE1	2254	2276	FALSE	752	759	QVQANTLG	QV*ANTLG	Q754*	NA	NA	coding	stop	NA	NA
CAGGTTCAAGTTATCTTCCT	neStops	+	chrV	401321	401343	YER120W	SCS2	187	209	FALSE	63	70	QVQVIFLG	QV*VIFLG	Q65*	NA	NA	coding	stop	NA	NA
CAGGTTTCAATGGGATATCA	neStops	-	chrXVI	568198	568220	YPR006C	ICL2	777	799	FALSE	259	267	TRFQWDIMG	TRF*WDIMG	Q262*	NA	NA	coding	stop	NA	NA
CAGTACCAATAAATTCCCGC	neStops	-	chrX	106617	106639	YJL166W	QCR8	184	206	FALSE	62	69	PAGIYWYW	PAGIY*YW	W67*	NA	NA	coding	stop	NA	NA
CAGTACCAGCAGCAGAGAAG	neStops	+	chrVII	693648	693670	YGR101W	PCP1	286	308	FALSE	96	103	QYQQQRSG	QY*QQRSG	Q98*	NA	NA	coding	stop	NA	NA
CAGTACCAGCCGTACTCACT	neStops	-	chrXIV	105584	105606	YNL283C	WSC2	1090	1112	FALSE	364	371	QYQPYSLG	QY*PYSLG	Q366*	NA	NA	coding	stop	NA	NA
CAGTAGACCAAACCTGTTTC	neStops	+	chrXVI	836285	836307	YPR155C	NCA2	1107	1129	FALSE	369	377	PLKQVWSTV	PLKQV*STV	W374*	NA	NA	coding	stop	NA	NA
CAGTCAAATGTCAAGATTAT	neStops	-	chrII	709946	709968	YBR245C	ISW1	1572	1594	FALSE	524	532	FSQMSRLLD	FS*MSRLLD	Q526*	NA	NA	coding	stop	NA	NA
CAGTCAAGATAAGAGGAACC	neStops	-	chrIII	167507	167529	YCR027C	RHB1	471	493	FALSE	157	165	GSQDKRNQA	GS*DKRNQA	Q159*	NA	NA	coding	stop	NA	NA
CAGTCAATCGCAGCAGATAA	neStops	-	chrIV	1240430	1240452	YDR383C	NKP1	225	247	FALSE	75	83	ASQSQQIME	AS*SQQIME	Q77*	NA	NA	coding	stop	NA	NA
CAGTCCAGGCTTGCCAAAAC	neStops	+	chrXV	835096	835118	YOR273C	TPO4	1314	1336	FALSE	438	446	GLFWQAWTA	GLFWQA*TA	W444*	NA	NA	coding	stop	NA	NA
CAGTCGCAGTCGCAGCAGCG	neStops	-	chrXII	130060	130082	YLL010C	PSR1	532	554	FALSE	178	185	QSQSQQRG	QL*SQQRG	S179L	Q180*	NA	coding	stop	c(-1.246, NA)	1.246
CAGTGCAAGAAATCAGCAAA	neStops	+	chrXIII	397913	397935	YMR064W	AEP1	11	33	FALSE	4	11	TVQEISKW	TV*EISKW	Q6*	NA	NA	coding	stop	NA	NA
CAGTGCAGATACTGAATACT	neStops	-	chrXVI	213423	213445	YPL177C	CUP9	518	540	FALSE	173	180	TVQILNTW	TV*ILNTW	Q175*	NA	NA	coding	stop	NA	NA
CAGTGCTCAGAAAGCGGCCG	neStops	+	chrIV	156548	156570	YDL170W	UGA3	231	253	FALSE	77	85	DSAQKAAVA	DSV*KAAVA	A79V	Q80*	NA	coding	stop	c(-0.085, NA)	0.085
CAGTTACAATTTGCTGTAAC	neStops	+	chrX	163234	163256	YJL132W	YJL132W	1321	1343	FALSE	441	448	QLQFAVTG	QL*FAVTG	Q443*	NA	NA	coding	stop	NA	NA
CAGTTCCAGGTATGGTTTAC	neStops	-	chrXIV	698572	698594	YNR039C	ZRG17	838	860	FALSE	280	287	QFQVWFTG	QF*VWFTG	Q282*	NA	NA	coding	stop	NA	NA
CAGTTCCATTTCATGTCTTC	neStops	-	chrIV	762870	762892	YDR150W	NUM1	7243	7265	FALSE	2415	2422	PEDMKWNC	PEDMK*NC	W2420*	NA	NA	coding	stop	NA	NA
CAGTTCTCAAGGAAGTGCTG	neStops	-	chrVIII	421416	421438	YHR161C	YAP1801	849	871	FALSE	283	291	DSSQGSAGA	DSF*GSAGA	S285F	Q286*	NA	coding	stop	c(-2.986, NA)	2.986
CAGTTGCAACTCATAATGTT	neStops	-	chrXIII	387331	387353	YMR056C	AAC1	892	914	FALSE	298	305	QLQLIMFG	QL*LIMFG	Q300*	NA	NA	coding	stop	NA	NA
CATACAAAATTCAAGAAGAA	neStops	-	chrXV	335753	335775	YOR005C	DNL4	1569	1591	FALSE	523	531	HIQNSRRRV	HI*NSRRRV	Q525*	NA	NA	coding	stop	NA	NA
CATACAAGAAGATGAAAAGA	neStops	-	chrX	655180	655202	YJR125C	ENT3	762	784	FALSE	254	262	LIQEDEKKA	LI*EDEKKA	Q256*	NA	NA	coding	stop	NA	NA
CATACAATGTCTGGACGTTG	neStops	+	chrXIII	734762	734784	YMR231W	PEP5	1218	1240	FALSE	406	414	YIQCLDVVE	YI*CLDVVE	Q408*	NA	NA	coding	stop	NA	NA
CATACAATTCAGAGTCACCT	neStops	-	chrXV	1042895	1042917	YOR375C	GDH1	126	148	FALSE	42	50	IIQFRVTWE	II*FRVTWE	Q44*	NA	NA	coding	stop	NA	NA
CATACAGCGCCTTAAGGCGA	neStops	+	chrXV	779956	779978	YOR235W	IRC13	87	109	FALSE	29	37	HIQRLKAKA	HI*CLKAKA	Q31*	R32C	NA	coding	stop	c(NA, -8)	8
CATACCAAACTCAATCCGGG	neStops	-	chrIII	163743	163765	YCR025C	YCR025C	92	114	FALSE	31	38	TYQTQSGW	TY*TQSGW	Q33*	NA	NA	coding	stop	NA	NA
CATACCAGTACAAAGGAACA	neStops	+	chrVIII	410536	410558	YHR155W	LAM1	3434	3456	FALSE	1145	1152	AYQYKGTR	AY*YKGTR	Q1147*	NA	NA	coding	stop	NA	NA
CATACCATATTATCCTATCC	neStops	+	chrXII	567103	567125	YLR213C	CRR1	798	820	FALSE	266	274	DPDRIIWYV	DPDRII*YV	W272*	NA	NA	coding	stop	NA	NA
CATACCATGCAGAATCATGG	neStops	+	chrXII	549726	549748	YLR201C	COQ9	546	568	FALSE	182	190	DHHDSAWYA	DHHDSA*YA	W188*	NA	NA	coding	stop	NA	NA
CATACCATGCTCTTTCCTGG	neStops	+	chrXIV	222233	222255	YNL227C	JJJ1	177	199	FALSE	59	67	DPQERAWYD	DPQERA*YD	W65*	NA	NA	coding	stop	NA	NA
CATACGAAAAGACTCTCAAC	neStops	-	chrIV	96513	96535	YDL203C	ACK1	1419	1441	FALSE	473	481	GIRKDSQLA	GI*KDSQLA	R475*	NA	NA	coding	stop	NA	NA
CATACGGCAGGCTGACATAC	neStops	+	chrXV	624950	624972	YOR154W	SLP1	222	244	FALSE	74	82	DIRQADIRE	DIW*ADIRE	R76W	Q77*	NA	coding	stop	c(-1.494, NA)	1.494
CATACTCAGCAACAGAAACA	neStops	+	chrVII	378533	378555	YGL066W	SGF73	925	947	FALSE	309	316	HTQQQKQG	HI*QQKQG	T310I	Q311*	NA	coding	stop	c(-0.994, NA)	0.994
CATACTCCATTTGTTTCTAT	neStops	+	chrXI	502184	502206	YKR031C	SPO14	4190	4212	FALSE	1397	1404	TNRNKWSM	TNRNK*NM	W1402*	S1403N	NA	coding	stop	c(NA, 1.219)	1.219
CATAGACAATCATCACATTT	neStops	-	chrVIII	72059	72081	YHL016C	DUR3	2164	2186	FALSE	722	729	HRQSSHFG	HR*SSHFG	Q724*	NA	NA	coding	stop	NA	NA
CATATCAGATATCGAAGCCG	neStops	+	chrXII	587281	587303	YLR224W	UCC1	818	840	FALSE	273	280	PYQISKPW	PY*ISKPW	Q275*	NA	NA	coding	stop	NA	NA
CATATTCAAACCTGTCTAGC	neStops	+	chrXII	1034976	1034998	YLR450W	HMG2	2350	2372	FALSE	784	791	HIQTCLAG	HI*TCLAG	Q786*	NA	NA	coding	stop	NA	NA
CATATTCAAGTATACCCAGA	neStops	+	chrVII	898591	898613	YGR199W	PMT6	1090	1112	FALSE	364	371	HIQVYPEG	HI*VYPEG	Q366*	NA	NA	coding	stop	NA	NA
CATATTGCAAACCAATTTCA	neStops	+	chrI	39594	39616	YAL056W	GPB2	336	358	FALSE	112	120	DILQTNFMV	DIL*TNFMV	Q115*	NA	NA	coding	stop	NA	NA
CATCAAAAATTCATTGAAGT	neStops	+	chrXIII	695533	695555	YMR214W	SCJ1	184	206	FALSE	62	69	HQKFIEVG	H*KFIEVG	Q63*	NA	NA	coding	stop	NA	NA
CATCAAAACGGCCTCATGAG	neStops	-	chrXV	389820	389842	YOR032C	HMS1	1234	1256	FALSE	412	419	HQNGLMSG	H*NGLMSG	Q413*	NA	NA	coding	stop	NA	NA
CATCAAAGACTCAATGTCAA	neStops	+	chrIV	554010	554032	YDR049W	VMS1	757	779	FALSE	253	260	HQRLNVKG	H*RLNVKG	Q254*	NA	NA	coding	stop	NA	NA
[truncated: 21,542 more rows]
