# Supplementary material for: Genome-wide base editor screen identifies regulators of protein abundance in yeast
Source: bioRxiv preprint, doi:10.1101/2022.03.09.483657, version 1 (2022-03-09)
Supplement: Supplemental Table 3 [file 483657_file05.xlsx]

## Sheet: Sheet1
guide	set	geneSys	gene	TpreGal_log2fc	T00h_log2fc	T08h_log2fc	T24h_log2fc
GATTCAGGTAGGGAAGAGTA	eStops	YOR249C	APC5	0	-2.13538	-2.26591	-5.41172
AGCCATCCATGTATCATCTC	eStops	YLL031C	GPI13	0	-1.84209	-4.80602	-5.26452
ATCTAACCAGAGGGTCGCCA	eStops	YOR373W	NUD1	0	-3.53046	-4.12326	-5.07709
TTTATGTCGAAGTTTCAATG	eStops	YKR002W	PAP1	0	-1.17516	-2.61335	-4.85367
TGTTTCCAAGAGGGTCATTT	eStops	YFR037C	RSC8	0	-2.40844	-4.31592	-4.79732
GGTTCAGTTTGAAGGCGGCG	eStops	YER147C	SCC4	0	-0.891663	-2.18851	-4.71678
TTTCAAGTGGACGAGAACTA	eStops	YJL019W	MPS3	0	-0.796264	-3.60232	-4.45764
AGGCCAAGACACAGAAAAAA	eStops	YMR112C	MED11	0	-0.973741	-2.83965	-4.33757
CAAGGCCCAAAAATAGGTGG	eStops	YGL001C	ERG26	0	-3.19939	-4.554	-4.32788
AAATCCCAAGATTTCCACAT	eStops	YHR186C	KOG1	0	-1.50929	-4.39212	-4.22591
ATTCAAAAATATTTGGGGGA	eStops	YDL007W	RPT2	0	-2.25636	-4.26741	-4.18604
ATGTCCCACACTTGAGACAG	eStops	YML093W	UTP14	0	-1.30787	-3.29602	-4.16488
TCTCAGACAAATGCATTTGG	eStops	YGL172W	NUP49	0	-1.67271	-4.04202	-4.05329
AACACAGCAAGACCTACCCA	eStops	YPL233W	NSL1	0	-3.03729	-2.81698	-3.98981
GTACCTCAACTAGCCGGTCA	eStops	YLR045C	STU2	0	-1.99709	-2.54932	-3.98095
ACAACAAGGAAGATTGCCTC	eStops	YDR113C	PDS1	0	-0.875395	-3.32219	-3.93903
ATTACAGGAATTAGATAATT	eStops	YLR424W	SPP382	0	-0.899972	-2.39135	-3.88087
TTTCCAAGTGGAGTACGCCC	eStops	YOL038W	PRE6	0	-2.903	-2.44143	-3.87543
ATTCAATATCACGAAAGGAG	eStops	YIL143C	SSL2	0	-3.08919	-1.04839	-3.86864
GTCTCAACAAGGTGCTGGTA	eStops	YLR175W	CBF5	0	-0.69304	-2.22442	-3.85899
CCTACAGTATTTAACTAGGT	eStops	YGR047C	TFC4	0	-0.275124	-1.13166	-3.77024
GGGACAATTGTTGGATAATA	eStops	YDR468C	TLG1	0	-1.36273	-2.00361	-3.75508
AGTCAGATGATAGTTCTGGA	eStops	YNL240C	NAR1	0	0.0700414	-2.53955	-3.68192
CATGGTCAAAAAGGTGTTTG	eStops	YOR207C	RET1	0	-1.44578	-2.52763	-3.64319
GTATACCAATATAAAGGGGC	eStops	YPR103W	PRE2	0	-2.5018	-6.00113	-3.64028
GTGTCCAATTACGCGCACGT	eStops	YER018C	SPC25	0	-2.07258	-3.97273	-3.58051
AAGTGTCAAACTTGTCAAGA	eStops	YDL140C	RPO21	0	-1.49199	-2.44843	-3.58032
TACCCCAAGAGGAAAACTCC	eStops	YLR215C	CDC123	0	-0.326856	-1.79142	-3.5767
GATTCAAAATGAAGAAATTA	eStops	YLR115W	CFT2	0	-1.98201	-5.77083	-3.56761
ATTTCAGAATCCAGATATGC	eStops	YIL150C	MCM10	0	-1.24457	-3.14467	-3.55678
ACTACCGATTCAATATCGTC	eStops	YKL019W	RAM2	0	-0.770558	-2.26154	-3.55609
GGTTACAAAAGCATCCAGAA	eStops	YPL082C	MOT1	0	-0.571829	-1.54715	-3.55427
GTTCCAAACAAAGTATTCAT	eStops	YPL094C	SEC62	0	-2.12076	-2.81273	-3.48045
ACCCCTTCAAGTAACTATTG	eStops	YGR098C	ESP1	0	-4.15812	-3.49962	-3.46691
ATATACCATAAAATATGAGA	eStops	YBR136W	MEC1	0	-0.706017	-1.21085	-3.4479
CTGATTCAAGCTATGAGGAC	eStops	YLR106C	MDN1	0	-0.734656	-2.10723	-3.43663
CAATCCGAATGTGGGATATC	eStops	YIL046W	MET30	0	-1.61076	-3.93816	-3.36295
TATTCAGAGAAAACTACAGG	eStops	YPR019W	MCM4	0	-1.59217	-2.36701	-3.34743
AAACCAAAAGGGGAAAGTAT	eStops	YOR160W	MTR10	0	-1.03656	-2.01322	-3.34368
TGTGTTCAAATGATCAAGGA	eStops	YGL245W	GUS1	0	-1.22272	-2.58759	-3.33353
AGGATCAAATACGGCGAGAA	eStops	YGL075C	MPS2	0	-1.85423	-2.42199	-3.33109
CTATCAAACAATCAAAAAGG	eStops	YNL181W	PBR1	0	-1.22498	-2.18754	-3.32387
TATTCAAAAATCGAGAAAGA	eStops	YGL150C	INO80	0	-1.1589	-1.36523	-3.30552
TTTCCAAACAGTGTAGAAAA	eStops	YHR186C	KOG1	0	0.0775918	-1.69799	-3.29058
TCTCTCCAATTGATTGATCT	eStops	YDL060W	TSR1	0	-2.22538	-3.44324	-3.28484
AATATCAAAACCTCCAAGAA	eStops	YDR189W	SLY1	0	-2.87642	-2.87255	-3.28386
AAGTCCGAGAATTTCAAAGG	eStops	YER172C	BRR2	0	-0.942811	-2.29409	-3.27021
CTCCCAGTTGATGTGATCAT	eStops	YPL233W	NSL1	0	-2.15036	-5.05593	-3.26822
TGGTTCACAAGGTCTTGGAA	eStops	YBR265W	TSC10	0	-1.74822	-3.60575	-3.26549
AGGTCTCAACAAAAATCATT	eStops	YDR407C	TRS120	0	-0.5208	-1.67375	-3.24603
TCACCCCATGGGCTTAAGTG	eStops	YGR103W	NOP7	0	-1.47148	-2.79438	-3.23925
GATCCAACAATCGTACAGCA	eStops	YHR083W	SAM35	0	-0.813882	-1.3797	-3.23211
GCTGCCCAACCCAAATTGTC	eStops	YNL247W	YNL247W	0	-1.21165	-2.83389	-3.22308
GGATCTCCAACAGAATGGAT	eStops	YBL076C	ILS1	0	-2.99465	-5.33748	-3.22255
ATCCCAATCGACGCTATTAC	eStops	YJL035C	TAD2	0	-0.361818	-1.10675	-3.21545
GGCACAAAGAAAGACGAATG	eStops	YBL097W	BRN1	0	-0.386864	-2.19153	-3.21502
ATTGAACCAGAACCGCGACG	eStops	YDR331W	GPI8	0	-2.24449	-3.80807	-3.20375
ATGTCAAAGACCAGGTTGTC	eStops	YER025W	GCD11	0	-1.64613	-2.5523	-3.15287
TCTTCAAATGGATGATGAAG	eStops	YGR047C	TFC4	0	0.0291235	-0.758676	-3.14006
GAGTTTCAAGCAAATTTGGA	eStops	YBL035C	POL12	0	-0.488877	-1.90647	-3.13619
GCCTTCAAGGCATTGTGATC	eStops	YBR257W	POP4	0	-1.41728	-2.97085	-3.11574
TCGTTCGAAACTTTCCTCTG	eStops	YHR186C	KOG1	0	-2.08063	-2.90951	-3.10789
GATCAGGTACTAGTGAAAGG	eStops	YJL041W	NSP1	0	-3.96762	-2.55497	-3.10101
CACCTATCAAGAAGTAGAAG	eStops	YKL089W	MIF2	0	-2.71327	-4.10724	-3.09762
ATAGTTCCAGTTACTTTGCT	eStops	YPL169C	MEX67	0	-2.75458	-3.6828	-3.08614
ATTTCCATTGATCAATTGGT	eStops	YMR309C	NIP1	0	-2.34282	-1.29134	-3.08446
GCATCCCAAAGTAAGGCACG	eStops	YMR211W	DML1	0	-0.400928	-2.38314	-3.07025
TGATTCAACAGCTTTCTATG	eStops	YCR057C	PWP2	0	-0.729829	-3.17851	-3.06992
ACTGTCCAAGAATTCCACAC	eStops	YKL060C	FBA1	0	-2.26836	-2.50578	-3.06599
AATTCAATATCACGAAAGGA	eStops	YIL143C	SSL2	0	-2.65771	-4.71531	-3.06105
TGTCCAGTCCCAGTAGTAGA	eStops	YGL142C	GPI10	0	-0.584949	-2.19507	-3.05992
CGCTCCTCAAGGTTTGGACA	eStops	YFL037W	TUB2	0	-1.82988	-4.00668	-3.05485
GACAGATCGATACCTTTCTC	eStops	YDR460W	TFB3	0	-1.21655	-2.78111	-3.04926
CTAAGCAAGATGTTGATCTT	eStops	YMR220W	ERG8	0	-0.641797	-2.64247	-3.04652
GATATTCAAGAAGGTACATT	eStops	YGR211W	ZPR1	0	-0.779776	-1.97647	-3.03551
GCGCGCCAGGACGATGAGCT	eStops	YLR305C	STT4	0	-0.556223	-2.33396	-3.03284
TGCACAACTGAAGTACTTGT	eStops	YKL203C	TOR2	0	-0.571578	-1.91499	-3.02493
TGCCTCAATTGCGTACGGGA	eStops	YPR082C	DIB1	0	0.468161	-1.54306	-3.01045
GTACCAGTACTTTAGCTCCA	eStops	YGL018C	JAC1	0	-0.578917	-0.934233	-2.99289
CCAATCAGTTATTCGAGGCC	eStops	YNL262W	POL2	0	-0.752988	-2.68385	-2.98851
AGCCATCAGCAAAACATATA	eStops	YPL190C	NAB3	0	-0.742427	-2.96032	-2.98762
TGGTCCACTCTTCGTTAGCT	eStops	YOR335C	ALA1	0	-1.31406	-2.85837	-2.98012
GGTCAGAAAATGTATATCAT	eStops	YMR076C	PDS5	0	-0.559066	-1.59995	-2.97547
AGATTTCAAGATTACCAAGC	eStops	YMR047C	NUP116	0	-0.55071	-2.32812	-2.97458
GATCAAGGCATGGTCATTAA	eStops	YLR378C	SEC61	0	-1.77419	-2.73869	-2.97145
ATTCCATTGTGAAACCCAGG	eStops	YPR162C	ORC4	0	-2.18296	-3.77305	-2.96942
AATCAAACTATTGACCAGCT	eStops	YIL004C	BET1	0	-0.879256	-3.07876	-2.96938
AGCGCCACTCGTCTACACGG	eStops	YLR141W	RRN5	0	-1.20185	-3.12954	-2.96931
AAGGTCCATTCTTTAGTAAT	eStops	YBL023C	MCM2	0	-2.88969	-4.00287	-2.96325
GGTCAGGGATATAGGAAGGT	eStops	YJL039C	NUP192	0	-2.619	-4.02852	-2.96015
AAATCAGTATGTAGTTCAAC	eStops	YLR100W	ERG27	0	-0.419362	-2.84162	-2.95889
TAGTTGTCAAACTGATGGCA	eStops	YKL144C	RPC25	0	-1.31515	-1.88934	-2.95705
ATTGCACAGGAGCGTTCTGC	eStops	YOR151C	RPB2	0	-1.88315	-2.90272	-2.95601
AATGCCAGCGATGTAGTCGA	eStops	YPR048W	TAH18	0	-0.436025	-1.7362	-2.95305
ATTCCATGTGTAGATTTCTA	eStops	YIL048W	NEO1	0	-3.48227	-6.38207	-2.95246
ATTTCCAATTGCTGGCAGGA	eStops	YDR407C	TRS120	0	-0.854097	-3.31781	-2.94195
TATCACGATATCTACTATTT	eStops	YHR102W	KIC1	0	-1.34423	-4.44749	-2.92421
GTCTCAACTGGGACTATCAA	eStops	YBR237W	PRP5	0	-0.0341756	-1.91743	-2.90933
GAACCCACGAGACGCAGCAT	eStops	YDR498C	SEC20	0	-1.51836	-3.3624	-2.90844
TTCATTCAACTATTATATAC	eStops	YNL189W	SRP1	0	-2.66145	-3.03545	-2.90708
GCTACAGAAAGTGGCTAATA	eStops	YBR202W	MCM7	0	-2.38211	-2.96166	-2.89354
GTCTCAAGACGAGCATTCGC	eStops	YPL210C	SRP72	0	-0.976977	-2.83454	-2.89025
ATTTATCAGCTCTGGCTGTC	eStops	YJL090C	DPB11	0	-1.71503	-3.4821	-2.89022
AAAATCAAGTAGACTCTACT	eStops	YKL012W	PRP40	0	-0.181378	-2.59205	-2.88261
ATATTCAAGCTCGTCGTTTA	eStops	YPL218W	SAR1	0	-2.61883	-3.86516	-2.88175
AATCCAGAACACCGATGATA	eStops	YNL126W	SPC98	0	-3.10738	-3.00107	-2.87553
TGTCCACGATGAATTGTTTC	eStops	YGL233W	SEC15	0	-1.56132	-3.76797	-2.86993
ATGATTCAATGTGCAGATGT	eStops	YIL048W	NEO1	0	-3.24867	-3.76142	-2.86701
TCATTCAAGATAACATAATA	eStops	YJL061W	NUP82	0	-1.08574	-2.99293	-2.86105
GGATCAAGGGTTTCTTGGCG	eStops	YER125W	RSP5	0	-1.44357	-2.72583	-2.85743
ACCCCATTGGTAACCTTCGT	eStops	YHR165C	PRP8	0	-1.54475	-3.34766	-2.85431
TACTACAACATGCTGTGTAC	eStops	YGL073W	HSF1	0	-0.351024	-1.26986	-2.85421
ATCGCTCAATGGAGAAAAGC	eStops	YPR181C	SEC23	0	-3.42765	-3.77048	-2.85174
TTTCAAGTCAATATACTTAT	eStops	YGR278W	CWC22	0	-1.09784	-2.37478	-2.85006
GTGCTCAGCAAGCGTTGAGA	eStops	YOL094C	RFC4	0	-0.624489	-2.28902	-2.84168
ATTCAAGGTAAGGCGGAGAG	eStops	YNL261W	ORC5	0	-1.34601	-2.05969	-2.83785
GTACCAGAGCAATTCTTATC	eStops	YNL126W	SPC98	0	-2.1836	-3.14057	-2.83112
AAGGGACAGAATAAGGGTTT	eStops	YGL098W	USE1	0	-1.33364	-2.34391	-2.82872
TGTTCTCAATTGTCCCCTGA	eStops	YGL116W	CDC20	0	-4.78943	-6.42902	-2.82276
GTACCAAGATCTGAATGAAG	eStops	YBR055C	PRP6	0	-0.483112	-1.709	-2.82234
AAACTTCAAGAAAGTGGTGA	eStops	YOR004W	UTP23	0	-1.38019	-3.16055	-2.81931
AATCCCAATTGACCAATTCA	eStops	YER008C	SEC3	0	-0.494488	-1.65662	-2.81782
AAGATCCCATACAATGATAT	eStops	YLR129W	DIP2	0	-1.68054	-3.03382	-2.80658
TGTCCAGTGGCAAGAATTGA	eStops	YBR070C	ALG14	0	-0.287659	-2.04424	-2.80264
TTTCCAGAAGCGATTATGGA	eStops	YDR240C	SNU56	0	-0.748221	-3.26525	-2.80011
TTTCAATACTCAAACGAAGA	eStops	YPR178W	PRP4	0	0.312308	-1.88363	-2.797
TTTACAGCAGGACAAGGAAT	eStops	YLL031C	GPI13	0	-0.877428	-2.09822	-2.79299
CCATCCCGAGTGGTGTATCT	eStops	YGL044C	RNA15	0	-1.78702	-1.88709	-2.79291
GTATTTCCATACCCGTACAG	eStops	YDR267C	CIA1	0	-0.472504	-1.31756	-2.79212
TTCCTCAGTCTGAGGAAACA	eStops	YDL140C	RPO21	0	-1.92186	-3.01751	-2.79005
AATCATTCCAGATACCAGCC	eStops	YOR157C	PUP1	0	-1.46258	-3.58418	-2.7801
ACAATTCAATTGAGACACCA	eStops	YLR274W	MCM5	0	-2.45819	-3.04777	-2.77683
AACAGCTCAAATGTACGCAT	eStops	YDL015C	TSC13	0	-0.754482	-1.8583	-2.77575
ATGCTCAGAAGGCTATCGAA	eStops	YDR170C	SEC7	0	-0.420246	-2.16492	-2.77068
CAAGCTCAACAACAGCTATA	eStops	YPL016W	SWI1	0	-0.96362	-2.51477	-2.77048
CCTCAAAATGTCGGTATTAA	eStops	YML126C	ERG13	0	-0.439854	-1.434	-2.76839
TTTACAACTGTCTGTTTCAG	eStops	YMR218C	TRS130	0	0.193908	-0.884856	-2.76608
TACAATCAGGTTTCCAGTCT	eStops	YPR113W	PIS1	0	0.133647	-2.02433	-2.76494
GATCCATATAGATGCCTGTT	eStops	YGR047C	TFC4	0	-0.281916	-0.83627	-2.7632
CTATCAAGCGAAGTGGTACT	eStops	YDL060W	TSR1	0	-1.26066	-2.80078	-2.76056
TATTCAAGGTCCAACTTCAT	eStops	YLR106C	MDN1	0	-0.573699	-1.86143	-2.75361
AAATCAGGACCAGGATTTAA	eStops	YOL034W	SMC5	0	-0.296183	-0.88898	-2.75272
AAACTCCATACTGCCATACC	eStops	YDL220C	CDC13	0	-1.94309	-4.69782	-2.75236
ACATTCAACATCTTCTGTAC	eStops	YBL041W	PRE7	0	-2.80165	-3.83901	-2.7425
AGATTTCCACATTGGATGTG	eStops	YHR186C	KOG1	0	-1.38466	-3.26128	-2.74131
AGACACCAAGGTATCATGGT	eStops	YFL039C	ACT1	0	-2.47755	-4.13335	-2.7404
TTCCTCGAGATGAGGGCCTA	eStops	YBR055C	PRP6	0	-0.147114	-0.798199	-2.73832
TATCAAAACCCTATGATGGG	eStops	YOL123W	HRP1	0	-1.02111	-2.33565	-2.73191
GTCTTTCAAAAACCTCCTCA	eStops	YMR128W	ECM16	0	-0.161123	-1.44335	-2.73025
GTTCCCAGTAAGCTGGAAGT	eStops	YNL247W	YNL247W	0	-1.85556	-4.11997	-2.72435
AGTGGTCGATTTGGTAGAAA	eStops	YDR021W	FAL1	0	-0.238969	-1.86156	-2.71653
CCTCAGAATCCTGATATTGA	eStops	YHR088W	RPF1	0	-0.797501	-1.98688	-2.7057
ATTTCCAGTACCTGTTTGAA	eStops	YJR046W	TAH11	0	-0.614016	-2.69725	-2.70464
TATCTATCCAGTGGGCATCA	eStops	YNL124W	NAF1	0	-0.356476	-1.02656	-2.70357
AAATCCATGCACTTTCTTCA	eStops	YKL144C	RPC25	0	-1.65231	-3.25335	-2.70346
CCATAATCCATAATGCACCG	eStops	YDR238C	SEC26	0	-2.40908	-3.42032	-2.70145
CTATTTCAAGACGTCCTTAA	eStops	YDR311W	TFB1	0	-1.64998	-2.1646	-2.69915
ACCCCAAGGAGCCATGGTCA	eStops	YPL169C	MEX67	0	-2.36159	-3.08108	-2.69599
TGCTACAGAAAGTGGCTAAT	eStops	YBR202W	MCM7	0	-2.58504	-3.98161	-2.69519
TTACCCAGCGAGATGTTTCT	eStops	YHR169W	DBP8	0	-1.47252	-3.07678	-2.6904
TGATTCAACAGGTCCCACCA	eStops	YDL132W	CDC53	0	-1.44432	-2.75392	-2.68783
ATCCCTCCATGGACCGATAT	eStops	YMR079W	SEC14	0	-1.41814	-2.60105	-2.68546
GGTCCAATCATCAGTCATAT	eStops	YGL055W	OLE1	0	-1.20174	-3.34737	-2.6846
ACAGACCAACCGCTATCTTC	eStops	YIL129C	TAO3	0	-1.29635	-2.36007	-2.68069
ACTCAGGATGAATTACAAGT	eStops	YLR106C	MDN1	0	-0.85195	-2.04229	-2.67939
TACCACCACAAACCCAGATT	eStops	YLR459W	GAB1	0	-0.941101	-2.12035	-2.67776
CCGCACCCCAAGCAACAAGA	eStops	YKL165C	MCD4	0	-1.61552	-2.19575	-2.67548
CAATCACCAAAGTATTAAAT	eStops	YJL087C	TRL1	0	-0.175314	-1.39411	-2.67293
TCCAATCAATTGCTCAAGGC	eStops	YLR117C	CLF1	0	-0.174222	-1.01215	-2.67125
ACTTCAAGAAGAGTGGGATC	eStops	YGR119C	NUP57	0	-1.74336	-2.68007	-2.66926
CCACCAGTTTCATGATATCT	eStops	YPL233W	NSL1	0	-3.07114	-3.68063	-2.66857
ATGTCCAATGTGCAGAGGTT	eStops	YIL143C	SSL2	0	-2.11921	-3.422	-2.66849
ATTCCATTCAAAACAATGGT	eStops	YPL007C	TFC8	0	-0.273591	-1.55683	-2.66195
GAGCCCATGCTTTAGCCCAT	eStops	YGL247W	BRR6	0	-0.540119	-2.53528	-2.65873
GCCCCAAATGGATTACATAG	eStops	YER013W	PRP22	0	-0.368213	-1.52664	-2.65812
TCCTCAGTCTGAGGAAACAA	eStops	YDL140C	RPO21	0	-3.13092	-3.85262	-2.65389
ATCCCAATGATAATCAGCGT	eStops	YAR019C	CDC15	0	-1.03935	-4.08215	-2.6522
TTGCCATAAAATAGTTTCCA	eStops	YML046W	PRP39	0	0.197182	-1.89822	-2.65098
GCTTCTCAAATTCAAGAGAA	eStops	YGR211W	ZPR1	0	-0.834808	-2.48555	-2.65034
GCTCAACAACAGCTATATGG	eStops	YPL016W	SWI1	0	-1.26883	-1.91006	-2.64681
ATTCCCAATCGGAAGCATTT	eStops	YGR047C	TFC4	0	-0.656162	-2.13525	-2.64387
AAATTACAATACTTGAAGAG	eStops	YPL128C	TBF1	0	-0.557727	-1.18239	-2.64377
ATTCAGGGCAGCGCGGTCAT	eStops	YNL290W	RFC3	0	-0.459967	-2.61456	-2.64318
TGGTCAAGCAGGTGTTACCA	eStops	YFR031C	SMC2	0	-1.99376	-2.84534	-2.64098
GGCCCATAATGCGACGTAAT	eStops	YGR024C	THG1	0	0.206476	-1.75848	-2.63466
CATGCAAGGTAAAATTACCA	eStops	YFR031C	SMC2	0	-1.8297	-1.70935	-2.63348
TATCACTCAACCAAGAAGAG	eStops	YMR128W	ECM16	0	-2.18648	-2.89984	-2.63209
GGATCAAGACGGTGGATTAC	eStops	YJL109C	UTP10	0	-1.06193	-3.82087	-2.63175
ACTCCCCACCTAGTTCTCAA	eStops	YNL251C	NRD1	0	-1.63626	-3.26557	-2.62845
ATCTATCCAGTGGGCATCAG	eStops	YNL124W	NAF1	0	0.474343	-1.50631	-2.62704
TCTCCAAGTCATATCATGAG	eStops	YPR178W	PRP4	0	-0.338657	-2.16216	-2.61427
CCATTCCAATGTTCTTATTG	eStops	YPR186C	PZF1	0	-0.70098	-1.15175	-2.60653
ACATTCAACGAACAAGGGAA	eStops	YIR010W	DSN1	0	-3.2189	-2.19232	-2.60487
GGGTATCAAGTAGCCACTGG	eStops	YPR178W	PRP4	0	-0.360835	-1.51483	-2.60223
ACCGAACAAAACAAAGGTTT	eStops	YNL112W	DBP2	0	-1.27261	-1.92798	-2.59485
TTCCAAGTGAACACTTCGCC	eStops	YNL036W	NCE103	0	-0.609406	-1.62759	-2.59286
GGTCAATGCGGGAACCACGT	eStops	YLR212C	TUB4	0	-3.25317	-4.02222	-2.59262
ATACAAGACTTGGTGGTCAG	eStops	YDR376W	ARH1	0	-0.493399	-0.73128	-2.5921
ATTCTTCCAAGATTATCCAT	eStops	YCR093W	CDC39	0	-1.62587	-2.98637	-2.58753
ACAATCTCAAAAATTGCCAG	eStops	YBR136W	MEC1	0	-0.253098	-0.776746	-2.5832
GAAGTTCAGGTTGGATTAGT	eStops	YML064C	TEM1	0	-2.9348	-3.0146	-2.58119
CGCCACAGTTATTACAACAG	eStops	YHR070W	TRM5	0	-0.271579	-1.60439	-2.58064
TACTCCCCAAGTTTACGGTA	eStops	YKL108W	SLD2	0	-3.59793	-3.53896	-2.57788
ATTATACAGGACATACTCGT	eStops	YJL085W	EXO70	0	-0.935662	-1.25818	-2.57712
CCCATTCAACCAAATAACAC	eStops	YKL186C	MTR2	0	-2.40367	-3.0441	-2.57691
CTTACAAGTAGAGAATGAGG	eStops	YGR113W	DAM1	0	-0.71521	-2.2782	-2.57686
CCTCAATATACCAAAGATTC	eStops	YLL035W	GRC3	0	-0.743393	-1.65858	-2.57516
AGGTCAAAATGCTTCCATCA	eStops	YKL060C	FBA1	0	-2.03691	-3.07624	-2.57388
TTTACAGAAGACTCCCTCAA	eStops	YKL108W	SLD2	0	-2.68774	-3.3085	-2.57307
TGATCCAAGGCAGCTCACGG	eStops	YDL145C	COP1	0	-2.16301	-3.90445	-2.57232
CTATCAAAAGTTAAAGCATA	eStops	YOR207C	RET1	0	-1.81955	-3.52402	-2.57124
TTTCCCAAGTAGTGATGTAA	eStops	YHR165C	PRP8	0	-1.03191	-4.00745	-2.57011
ACTGTCTCAAGTGTGGGACA	eStops	YML093W	UTP14	0	-0.667495	-2.72092	-2.56912
TGTCCAAATACCAGGAACGT	eStops	YNL216W	RAP1	0	-1.19786	-1.66307	-2.56906
ATCATACCAAGCACCCAAGG	eStops	YKL112W	ABF1	0	-1.8638	-3.51381	-2.56771
GGTCCATAGCTTGAATGGTT	eStops	YDR353W	TRR1	0	-0.389673	-1.25374	-2.56539
GCCTCAATTGACCAGGGGAA	eStops	YLR100W	ERG27	0	-0.809647	-1.4404	-2.56408
GAATCAGAATCTGGTTAACA	eStops	YNL062C	GCD10	0	-0.322961	-1.40669	-2.56098
TTTATCTCAAGTATTTACTT	eStops	YJR041C	URB2	0	-0.367839	-2.26129	-2.55803
GATATCCCACATTCGGATTG	eStops	YIL046W	MET30	0	-2.23972	-3.80945	-2.55687
AACTATCAAGACATGGCGCG	eStops	YPR181C	SEC23	0	-2.09761	-4.48607	-2.55525
CTTTCAAACTTGCAGGGATG	eStops	YDR047W	HEM12	0	0.0444048	-0.439205	-2.5545
GGGTTTCAAACATTTGGGTT	eStops	YNL026W	SAM50	0	-0.691677	-0.0966971	-2.55217
ATATTTCCAGGGCAACTTTA	eStops	YPR048W	TAH18	0	0.411553	-1.2022	-2.54939
CTGTCCAGTCCCAGTAGTAG	eStops	YGL142C	GPI10	0	-0.500652	-2.16822	-2.54523
GGCTCAACGTAAACAAAGTT	eStops	YJR016C	ILV3	0	-1.03167	-3.61944	-2.5431
AACTCCATACTGCCATACCT	eStops	YDL220C	CDC13	0	-2.40487	-4.23527	-2.54178
CATCCCATGTAATTGTGCGG	eStops	YLL035W	GRC3	0	-0.71363	-3.22355	-2.54024
GCCTCAGGATTTGAGTACTA	eStops	YLR106C	MDN1	0	-0.341647	-1.31094	-2.54004
CACCTACAAAGCGAAATGGA	eStops	YPL151C	PRP46	0	-1.41043	-2.65947	-2.53996
GGGGATCAATGTGACAAATG	eStops	YGR264C	MES1	0	-1.05922	-2.72875	-2.53914
AACTCAATATAGGGAAGCTC	eStops	YOR207C	RET1	0	-1.23648	-3.64377	-2.53628
GATCCTCAAGTCAGGAGATC	eStops	YOR250C	CLP1	0	-1.68537	-3.08322	-2.5355
TTCCATGCAACTTGAAATAG	eStops	YNR016C	ACC1	0	-0.832652	-2.22416	-2.53422
AGCGGTCCAGAAAGAAGCTT	eStops	YJL026W	RNR2	0	-1.26771	-5.47983	-2.53402
TTTCCAGAATCATTATCGTG	eStops	YPR161C	SGV1	0	0.614812	-0.970137	-2.53295
TGGACCAGAAAGTAATGAAA	eStops	YPR183W	DPM1	0	0.0160093	-1.96946	-2.53227
GATTCAAATTAACAAGGAAA	eStops	YJL074C	SMC3	0	-0.337522	-1.82277	-2.52483
ATTCAGCTGATAGAGAAGTT	eStops	YFL024C	EPL1	0	-2.20744	-1.1874	-2.52271
ATTATCCATTGAGCATCCTC	eStops	YLL035W	GRC3	0	-0.575217	-1.71327	-2.51887
TCCGTTCAATCCACTGATAC	eStops	YGL201C	MCM6	0	-2.22931	-2.69255	-2.51842
TTTGTCCAACTGTTCCTCAA	eStops	YOR145C	PNO1	0	-1.6155	-2.01231	-2.51585
TATCAAAGAGGCAAGATGCA	eStops	YPR168W	NUT2	0	-1.09478	-1.33443	-2.51503
TATCAGCAAAAGGCTCATGC	eStops	YNL313C	EMW1	0	-0.219587	-2.27405	-2.51467
GTTCCAATTGAATTTAAACG	eStops	YKL045W	PRI2	0	-1.23459	-3.71754	-2.51075
TCTCAAAGTGAGGAACAGAT	eStops	YIL004C	BET1	0	-1.10911	-2.92546	-2.50952
TTCTCAATCTGACATAGTCG	eStops	YBR049C	REB1	0	-1.64197	-3.12239	-2.50795
TATCCAAGTAGCTGACCATT	eStops	YHR165C	PRP8	0	-0.742205	-2.00982	-2.50774
TCTTCGAGAAAATGGCTGGA	eStops	YKL012W	PRP40	0	-0.177256	-1.76106	-2.50424
GGGACAATGCTACAATGACA	eStops	YGL018C	JAC1	0	0.226413	-0.702694	-2.50281
AACATTCAACATCTTCTGTA	eStops	YBL041W	PRE7	0	-2.17551	-3.68523	-2.49882
CAACCTCAACAATCCACCAT	eStops	YGR119C	NUP57	0	-2.19436	-3.47669	-2.4982
CAGGATTCAACTAAGCAGCT	eStops	YDR361C	BCP1	0	-0.695785	-1.41575	-2.49783
ATCTCAAATGGATACCTCAA	eStops	YGR195W	SKI6	0	-1.64477	-2.52673	-2.49616
AGAACAAGGTTTGAACAGCC	eStops	YPL085W	SEC16	0	-0.0171112	-1.51694	-2.49453
GATCAATACATTGAAGTGCC	eStops	YNR016C	ACC1	0	-0.901597	-2.25539	-2.49419
ACTGCGAAATCTAGACGAGA	eStops	YKR002W	PAP1	0	-1.10462	-2.07119	-2.49397
AATATACCAAATGGCATTGG	eStops	YMR200W	ROT1	0	-1.36341	-2.22967	-2.49394
GTTTATCAAGGGACAACGAT	eStops	YHR102W	KIC1	0	-1.36467	-2.89869	-2.49262
TCGTACCAAGTACCGAAATC	eStops	YOR057W	SGT1	0	-0.575057	-1.27058	-2.49092
TGTGCAGTGTTTGGATGAAT	eStops	YML098W	TAF13	0	-1.28448	-3.4198	-2.48874
CGGTCAAAGAACCAGATTTA	eStops	YGL123W	RPS2	0	-2.40114	-2.20692	-2.4884
AGTTCAAACGCACGCCGCAG	eStops	YMR308C	PSE1	0	-0.20828	-0.806063	-2.48716
TTTAATCAACCGCATCTATC	eStops	YGL169W	SUA5	0	-0.110016	-1.25574	-2.4821
TGAACCAGATACATCTAGCA	eStops	YKL165C	MCD4	0	-1.47363	-2.51075	-2.48178
AAGAACGAAGAGACCGATCT	eStops	YPL255W	BBP1	0	-0.806499	-3.00569	-2.47968
CAGGTCAAATTCCAACTGGT	eStops	YPL231W	FAS2	0	-3.25287	-4.90826	-2.47352
AATCCTCAGTATCAAGGTGG	eStops	YLR106C	MDN1	0	-0.556195	-2.40475	-2.47263
GAAGAACAAAAATTGTATAA	eStops	YOR004W	UTP23	0	-0.736984	-2.41408	-2.47135
GGTCCCAGATAACTCCTCTA	eStops	YOR181W	LAS17	0	-2.35329	-2.99452	-2.46738
ATCCATACTAAGGACCTGTA	eStops	YBR234C	ARC40	0	-4.13836	-3.21125	-2.46663
GGATCTCAAGAGCAAGAACT	eStops	YML065W	ORC1	0	-1.52956	-3.00349	-2.46596
TAAGGTCCAAGAAAGTAAAT	eStops	YLR430W	SEN1	0	-1.39627	-2.2781	-2.46524
GAACACGATATATCGATATA	eStops	YAL034W-A	MTW1	0	-1.92324	-3.24647	-2.46434
GTACCTCAATTAGGCCACGT	eStops	YHR165C	PRP8	0	-0.918012	-3.23981	-2.46219
GGCTCAACAAGTCTCCATCA	eStops	YDR189W	SLY1	0	-3.04003	-2.80522	-2.45996
TGATCAAACGATCAGTCATG	eStops	YPL255W	BBP1	0	-1.95392	-3.015	-2.45976
TTACTTCAAGTCGCATTCTT	eStops	YKL165C	MCD4	0	-0.974506	-2.68609	-2.45816
GCTCAGTTCTTGACCAAGTA	eStops	YDR353W	TRR1	0	0.0682905	-1.34694	-2.45566
TTACACAAAAGCTCTCCAAA	eStops	YML077W	BET5	0	-0.394441	-3.14392	-2.45334
CTGTACCATTCCTTCACATC	eStops	YBR136W	MEC1	0	-0.436512	-0.281416	-2.44839
AAGTTTCAGTGCGTCGCTAC	eStops	YML127W	RSC9	0	-1.54616	-2.64409	-2.44712
ATCACTCCAAATATAGAAGA	eStops	YLL003W	SFI1	0	-1.9105	-5.04246	-2.44465
AAAATCCATGCCATCCGTAT	eStops	YBR002C	RER2	0	-0.519306	-1.53592	-2.44269
ATTTACAGCAGGACAAGGAA	eStops	YLL031C	GPI13	0	-0.295103	-1.47305	-2.44208
GACACTCCCAAGGGAATAAA	eStops	YGR098C	ESP1	0	-3.67736	-5.02019	-2.43931
TATCCATTTGATGTAGTCAC	eStops	YJL025W	RRN7	0	-0.984603	-1.47498	-2.4349
ATCATCCCATGTAATTGTGC	eStops	YLL035W	GRC3	0	-1.29306	-1.68914	-2.4343
GATCAATTGGTTAGAGAAGA	eStops	YGL120C	PRP43	0	-0.87875	-1.73808	-2.43199
ACAATTCAAGATGTGGTTTA	eStops	YFR028C	CDC14	0	-0.449554	-2.60955	-2.42999
ATAACTCCAACCTTTCTGCT	eStops	YOL010W	RCL1	0	-1.45273	-2.33237	-2.42931
GGTCCAATTGATGATTTCTG	eStops	YDL235C	YPD1	0	-2.33149	-4.13449	-2.42735
TCCTCATCAAAGAGCGATCA	eStops	YNL262W	POL2	0	-0.623008	-1.20354	-2.42536
ATGCTCAAGTAAATAACCAT	eStops	YKL014C	URB1	0	-0.847353	-2.43781	-2.423
CGTGATCCAGCCGACGTCAC	eStops	YLR153C	ACS2	0	-1.29407	-3.11048	-2.41889
CCCATCCATAACTCTGCATA	eStops	YER003C	PMI40	0	-0.468434	-2.13129	-2.41722
TATCCAGGGGTTCCCTACTC	eStops	YIR010W	DSN1	0	-2.59301	-3.51909	-2.41564
AAGTGCCCAACTTAGCATTG	eStops	YGL091C	NBP35	0	-0.273963	-1.55715	-2.41403
CAAATGTCAAGATGAGAAGA	eStops	YPR176C	BET2	0	-0.800623	-2.3153	-2.41385
AATTATCCAAGTATGTTCAC	eStops	YJR041C	URB2	0	-0.821419	-2.17059	-2.41349
AATGTATCAAAACCCTATGA	eStops	YOL123W	HRP1	0	-2.00874	-3.13918	-2.40375
ATTCAATATTTGGAACAAGA	eStops	YLR215C	CDC123	0	0.113294	-1.87173	-2.40351
TATCTTCCAGAATTCCCAAT	eStops	YGR047C	TFC4	0	0.0269186	-1.2285	-2.40281
GACCCAACAGTGGTCTATGG	eStops	YPL016W	SWI1	0	-0.139775	-0.912247	-2.4026
CTGCCCATTTGAAACCTGGG	eStops	YNR054C	ESF2	0	-0.848641	-2.10956	-2.40243
TTTCAGGAAATGGTTATCGA	eStops	YDR324C	UTP4	0	-0.742401	-2.05004	-2.40156
GTCCAAATACCAGGAACGTT	eStops	YNL216W	RAP1	0	-2.30463	-2.53045	-2.40043
ACTGCCCAAAAGACAGGATT	eStops	YIR006C	PAN1	0	-1.11383	-2.63854	-2.39952
TTTCCAAGGGAAGTAGGAAC	eStops	YML092C	PRE8	0	-2.90654	-1.20481	-2.39898
GAGGCTCAACTAAAAAGGAA	eStops	YPL082C	MOT1	0	0.129941	-1.05816	-2.39721
AGATTACAAAAGGTGTTGGA	eStops	YGR245C	SDA1	0	-1.69384	-2.2222	-2.39666
CATTCAAATATATGGATTTG	eStops	YGR119C	NUP57	0	-0.166259	-2.3357	-2.39605
AGGGTCCAGGGCGTCGCTGA	eStops	YJL005W	CYR1	0	-1.28668	-3.62085	-2.39588
TATCAGTTTAACCATACACA	eStops	YOR373W	NUD1	0	-1.07379	-1.94714	-2.39498
TATCAAGGTGGTGGTAGGAA	eStops	YLR106C	MDN1	0	-0.731899	-2.70403	-2.39357
AGGTCAAACACATGATCCTA	eStops	YHR040W	BCD1	0	-0.186044	-1.48871	-2.39227
CTTCCATCGTGATAATTCTG	eStops	YHR166C	CDC23	0	-3.15731	-3.10058	-2.38988
CTATCAGGGAAAGAAATATG	eStops	YMR218C	TRS130	0	-0.0426516	-1.64921	-2.38922
ATCCCATGAAATTGGGCGCA	eStops	YPR175W	DPB2	0	-0.593406	-1.71041	-2.38648
GTTCTTCCAGGATCCAGAGA	eStops	YGR047C	TFC4	0	-0.50596	-1.3168	-2.38546
AAAGTCCATTTGGTGTTCAA	eStops	YOL139C	CDC33	0	-1.18906	-1.63879	-2.3851
CCTCCACGATTGCTCATCGG	eStops	YMR296C	LCB1	0	-1.57638	-2.36035	-2.38298
ATTTCCACGTAACGTAGTCC	eStops	YML015C	TAF11	0	-1.45161	-2.37822	-2.38292
TCTGACCAAGCTTTATTGTT	eStops	YPL146C	NOP53	0	-0.500651	-1.08885	-2.38038
AGATACCCAGGCATCAGCTT	eStops	YHR165C	PRP8	0	-0.413097	-1.82353	-2.38003
CCTGAACAAATGGTCAACAA	eStops	YNL188W	KAR1	0	-1.10492	-2.37259	-2.37921
GTTATTCAAAATAGGATTAT	eStops	YNL102W	POL1	0	-0.69051	-2.12022	-2.37867
TTATCCATACAAGATCATAA	eStops	YDR235W	PRP42	0	-0.439845	-2.86702	-2.37826
CTTTCCATCTTCTTATAACA	eStops	YJL069C	UTP18	0	-1.72787	-3.68299	-2.37461
TTAATCAGCACGTTATCGTC	eStops	YNL062C	GCD10	0	0.289426	-0.442668	-2.37076
TGCTCAAAACGCCTACTTGA	eStops	YDR050C	TPI1	0	-0.597539	-2.02037	-2.36877
AATCCCAATAATATTGATAT	eStops	YLR106C	MDN1	0	-1.1279	-2.86724	-2.364
CGTTACAGAGATATATAAGA	eStops	YHR101C	BIG1	0	-0.331903	-2.16627	-2.35989
GAAGCAGATGGGCTTTGAGT	eStops	YDR341C	YDR341C	0	-0.152256	-1.89844	-2.35964
ATCTTCAGAATGACTTAAAC	eStops	YPR055W	SEC8	0	-1.41492	-2.9442	-2.35788
GGGTCAAATTTATCATTCCA	eStops	YBR055C	PRP6	0	-0.0851833	-1.98367	-2.35778
TATAACCATGAAGCATGTTC	eStops	YDR044W	HEM13	0	0.236469	-0.825521	-2.35488
TTGCACAGGACTCTACACCT	eStops	YPR010C	RPA135	0	-1.37405	-2.06092	-2.35378
TGAGCCCAAAGAGTGCCTTC	eStops	YKL173W	SNU114	0	-0.506802	-1.84546	-2.35348
TTAAACAAGCGCTAGCTCAG	eStops	YNL075W	IMP4	0	-0.993909	-1.71394	-2.35309
AACGTCCCAAAGATGGATCT	eStops	YLL011W	SOF1	0	-1.95353	-2.68775	-2.35196
TGCACCCAGTCGCTTAAAGC	eStops	YKL004W	AUR1	0	-1.99105	-2.17802	-2.35124
ACCACGAATCGTTCCATGGA	eStops	YKR063C	LAS1	0	-0.693346	-1.43486	-2.3505
ATAGTCAAGGCAAAGCTTCA	eStops	YIL147C	SLN1	0	-0.818002	-1.98571	-2.34984
TCTAACCAGTCTAGGAACTC	eStops	YGL040C	HEM2	0	0.0995717	-0.889923	-2.34974
AGACCCAAATAGCCATCGGA	eStops	YBL004W	UTP20	0	-0.769635	-1.94526	-2.34969
TCGTCGACGTGAAGTTAAGA	eStops	YNL102W	POL1	0	-1.53582	-2.80614	-2.34838
GAATCGACCAGAGAATCAGG	eStops	YOR056C	NOB1	0	-1.46901	-2.81765	-2.34803
CTACATCAAACAGCCAAGGA	eStops	YMR290C	HAS1	0	-1.18356	-1.20058	-2.34795
TGATCAATTTATAGAATTCT	eStops	YDR166C	SEC5	0	-0.748581	-1.27298	-2.34302
TACCCGAGACAACGCTGTTA	eStops	YKL019W	RAM2	0	-0.153234	-1.69623	-2.33983
ACGTCAAAGATGGGACATCG	eStops	YDR062W	LCB2	0	-1.80664	-1.99353	-2.33473
AGCACAAACTAATGGCGAAG	eStops	YLR106C	MDN1	0	-0.531102	-1.865	-2.33346
ATGACCATAACCTTGCGGTT	eStops	YBR198C	TAF5	0	-2.48477	-2.99399	-2.33232
ATGTATCAAAACCCTATGAT	eStops	YOL123W	HRP1	0	-1.54716	-1.81266	-2.33172
ATTACAATCCGCTTCCAAGG	eStops	YJR068W	RFC2	0	-0.513506	-2.32183	-2.33142
ATGGATCAGGAAAAGAAGTA	eStops	YOR151C	RPB2	0	-2.4836	-3.88725	-2.33049
AGATCTCCAGTTTATGTTAG	eStops	YPL243W	SRP68	0	-1.53032	-3.11354	-2.32783
GGCATTCAAAACTATTTACA	eStops	YEL019C	MMS21	0	0.123215	-0.679501	-2.3239
CGTCAAGTAACCAATTCTAC	eStops	YOR319W	HSH49	0	-0.57685	-1.62044	-2.32311
AATCAGTATGTAGTTCAACC	eStops	YLR100W	ERG27	0	-1.55437	-2.45773	-2.32061
ATTCAGATTAATGAAAAGTA	eStops	YCL054W	SPB1	0	-1.59616	-2.5012	-2.31881
TGCTCAAAAAGCAAATGGCC	eStops	YER093C	TSC11	0	-0.950574	-3.60372	-2.31776
TTAATTCAGCGTATATCTGA	eStops	YKL165C	MCD4	0	-0.934494	-1.63436	-2.31749
ATCCAAAATGAGCTAGAAGG	eStops	YHR172W	SPC97	0	-1.98954	-2.54163	-2.31706
AAGCTCAAGTGGAAGCGGAG	eStops	YOR194C	TOA1	0	-1.91231	-1.96802	-2.31689
TAATTCAATATCACGAAAGG	eStops	YIL143C	SSL2	0	-0.878669	-4.09199	-2.3161
TTCCAGTGCAAGTATATGGT	eStops	YNL240C	NAR1	0	-0.578515	-0.525423	-2.31511
GATTCAAGGCGCTTTACCTT	eStops	YNR016C	ACC1	0	-1.77982	-1.99316	-2.31166
TTCATTCCATAGGGATAGTT	eStops	YLR103C	CDC45	0	-2.08685	-4.06689	-2.31134
AGTAATCCAGTTGTCACGAG	eStops	YGL055W	OLE1	0	-1.04139	-3.11662	-2.30937
TAAACAAGGGAGCGTCACTG	eStops	YMR314W	PRE5	0	-0.891514	-1.31345	-2.30725
AAGCTTCAGGGTCAGTATGT	eStops	YEL058W	PCM1	0	0.00126003	-1.48989	-2.30689
ATATCAGAGAAAGTTCAAAA	eStops	YAR008W	SEN34	0	-0.651195	-1.21545	-2.3049
GTATTCAGTATATACATGGA	eStops	YPL204W	HRR25	0	-0.960313	-3.26122	-2.29971
AACTATCAATACGATTTATG	eStops	YMR049C	ERB1	0	-0.545855	-3.96943	-2.2993
ATATTACCAGGCGTACTATT	eStops	YIL147C	SLN1	0	-0.749588	-2.81926	-2.29596
GGCCCGAGAAAAACATAAGG	eStops	YMR076C	PDS5	0	-1.04968	-1.93496	-2.29585
CAACTCCAGGACGAATTGCG	eStops	YPR181C	SEC23	0	-3.19303	-2.78098	-2.29533
AGCTTCAAAACTTATATAAT	eStops	YLR033W	RSC58	0	-0.567303	-2.13564	-2.29521
TTACGACAACAGAGGTGTTC	eStops	YJL005W	CYR1	0	-1.60151	-3.01326	-2.29289
CGTTCAGCAACCGGAGGTTC	eStops	YKL210W	UBA1	0	-0.910445	-2.20763	-2.29273
TTCCATTCAGCATAGTCCTT	eStops	YOL034W	SMC5	0	-0.393308	-2.00917	-2.29186
CTTTCAGGTCCCAAAAAATG	eStops	YLR430W	SEN1	0	-0.790224	-2.42696	-2.29134
ACATTCCAATCGTCATCTTC	eStops	YLR347C	KAP95	0	-1.97853	-3.10139	-2.29081
TATTTCCCATAGGTGCGACT	eStops	YKR025W	RPC37	0	-0.566358	-2.13751	-2.28871
GATCAAGATGAAGTAAACAA	eStops	YJR112W	NNF1	0	-1.69753	-2.38627	-2.28832
ACCTCTCAATCTACTAATGC	eStops	YMR047C	NUP116	0	-1.07432	-2.50226	-2.28775
TTATACCATGGGGGAGCGGC	eStops	YKL004W	AUR1	0	-2.00682	-4.48454	-2.28706
ATCCAGTAAAACACTAGAGG	eStops	YHR007C	ERG11	0	-2.98873	-3.14453	-2.28703
AATCAGAATCTGGTTAACAT	eStops	YNL062C	GCD10	0	-0.0151684	-0.84957	-2.28681
GAAGTCAAAGCATTTCTAAC	eStops	YHR102W	KIC1	0	-1.37253	-2.22861	-2.286
GTCTACCCATGCTTCAACTC	eStops	YHR186C	KOG1	0	-1.83993	-3.39317	-2.28557
AGAACTCAACCAAAGAAAGG	eStops	YDR037W	KRS1	0	-1.1755	-2.78876	-2.2853
ATTCAGGGTCCACCTGGTAC	eStops	YLR430W	SEN1	0	-1.44296	-2.00517	-2.2852
ACTACAACATGCTGTGTACA	eStops	YGL073W	HSF1	0	-1.19866	-1.9263	-2.28333
TCATCAAGGTTTCTTGAGGG	eStops	YGL040C	HEM2	0	-0.0987867	-1.24992	-2.28325
GTATCAATTATCACTGCAAG	eStops	YLR310C	CDC25	0	-1.32301	-3.51186	-2.28306
ACACCAGACGGCGCACGCAG	eStops	YNR017W	TIM23	0	-1.10986	-1.55333	-2.28029
TTCACCCATAAACGAGAAAA	eStops	YAL001C	TFC3	0	-0.759894	-1.98571	-2.27914
GACCTCCAGGGTTTGGTTAG	eStops	YPL242C	IQG1	0	-0.973704	-2.45099	-2.27912
ATCTCAAAGTGAGGAACAGA	eStops	YIL004C	BET1	0	-1.63565	-4.11222	-2.27767
CTAATCAAGATAAAAGTCAA	eStops	YDR166C	SEC5	0	-1.46372	-2.07834	-2.2763
ATTCCATATCCAATAGACTT	eStops	YJL031C	BET4	0	-0.144789	-2.47317	-2.27474
CTACCACAATACCAAAGGAT	eStops	YOR244W	ESA1	0	-0.799981	-2.41891	-2.27364
ACGCCCAATCCCTTATTCCC	eStops	YLR088W	GAA1	0	-1.3105	-3.34241	-2.2727
AACTACAGGAGGATTTGTCA	eStops	YPR019W	MCM4	0	-0.524968	-1.24705	-2.27252
AAGCTTCAAGAAAATTTGAG	eStops	YJL109C	UTP10	0	-0.828995	-1.71379	-2.2719
TTAATCGACAAATTGTGAAT	eStops	YOR249C	APC5	0	-1.0952	-3.17339	-2.2701
AAGTAACCAAGTTTCAGGAG	eStops	YHR072W	ERG7	0	-0.321001	-0.891271	-2.26804
TTCTTCCACTCTGCAATCGT	eStops	YMR277W	FCP1	0	-0.940038	-2.41094	-2.26802
AACATATCAGATAAGAACGA	eStops	YLR033W	RSC58	0	-0.462019	-1.68702	-2.26602
TATTCCGAAACTGGTCAAGT	eStops	YGL128C	CWC23	0	-0.465038	-1.34625	-2.26584
CGGATCCCAAGAAGGAGCAT	eStops	YPL082C	MOT1	0	-0.87699	-2.73155	-2.26349
TATCAGGGACGACTAAAAGA	eStops	YLR430W	SEN1	0	-1.24998	-2.31731	-2.26285
CAATCAACTTCCTGCCAATA	eStops	YJL011C	RPC17	0	-1.1141	-1.98131	-2.26215
CCTACTCAAAGGTTTGGCTC	eStops	YPL085W	SEC16	0	-1.04015	-2.74731	-2.25967
GACACCAACCGATATAATGT	eStops	YKL203C	TOR2	0	-0.365307	-2.43869	-2.25875
TATCAAGGTTGGTTAATGGT	eStops	YIL048W	NEO1	0	-2.10712	-4.85586	-2.25612
GCTCCCAAACGTAAGCATTA	eStops	YBR234C	ARC40	0	-2.84613	-4.17774	-2.25546
TTACAAAGACACTTATCCCT	eStops	YCR035C	RRP43	0	-1.5426	-1.73443	-2.25529
AATTGCGAAATGCTATGGCG	eStops	YNR011C	PRP2	0	-0.425441	-1.04489	-2.25461
GCTTCAGGGTCAGTATGTGG	eStops	YEL058W	PCM1	0	0.0195476	-1.71646	-2.25452
TGGTCCAAGCTGCCTTGTGA	eStops	YDR164C	SEC1	0	-0.392478	-2.48546	-2.25449
CATCATCCAATCCTCAAATT	eStops	YNL262W	POL2	0	-0.574739	-2.34729	-2.25428
ATCAGCAAGATGGTGTTAAC	eStops	YPL082C	MOT1	0	-0.796624	-0.934015	-2.25283
TACGCCATCTTAGAACACCC	eStops	YFR051C	RET2	0	-0.722221	-1.56825	-2.25278
TACCCATTGTGATCTATCAT	eStops	YJL005W	CYR1	0	-0.69368	-1.43462	-2.25207
GCTGTCCAACGACTACACCC	eStops	YNL240C	NAR1	0	-0.679007	-1.91799	-2.25205
GCTCCTCAGTTCACAATTCC	eStops	YKR086W	PRP16	0	-0.542567	-1.99351	-2.25186
GACGGTCAAGGTACTTTGTT	eStops	YBR143C	SUP45	0	-1.99438	-1.63437	-2.25074
ATTTCAAGAGGCCTCCGAAA	eStops	YGR185C	TYS1	0	-1.23784	-2.39555	-2.24652
TGTCCAAGTAACAGAGCCAA	eStops	YLR106C	MDN1	0	-0.436523	-1.77882	-2.24494
CTATTCTCAAGGCACAACAG	eStops	YLR103C	CDC45	0	-1.9786	-4.61587	-2.24294
AGAACTCAGTTGTTTGGCTC	eStops	YLR078C	BOS1	0	-0.90478	-3.02364	-2.24196
TTATTCCAAAAGTTGTCCTT	eStops	YBR049C	REB1	0	-1.92995	-3.56314	-2.24156
ATTTCTCAAGATACACATAC	eStops	YHR170W	NMD3	0	-2.11974	-2.25505	-2.23995
ATTGATCAGTATGCATTCCG	eStops	YJR064W	CCT5	0	-3.93954	-3.8998	-2.23744
GACCTTCAAAGAGCATTTAA	eStops	YLR215C	CDC123	0	-0.588463	-2.51477	-2.23519
AACATCCAAGTATATAATCA	eStops	YLR459W	GAB1	0	-0.833207	-1.76048	-2.2332
CCTCAAGTGATGGGTACGTG	eStops	YMR236W	TAF9	0	-1.14052	-1.51907	-2.23127
TCAACAACGTAAAAAGGAGT	eStops	YGR005C	TFG2	0	-1.74435	-4.21675	-2.23041
TTCTTGCCACAAGAATTCTC	eStops	YHR020W	YHR020W	0	-1.15323	-2.2744	-2.22836
TGGGTCAATTCGATATTTCG	eStops	YBR004C	GPI18	0	-0.1486	-1.07636	-2.22781
CCTTGCCAAATTAATAGGGT	eStops	YPR175W	DPB2	0	-1.45488	-2.45233	-2.22568
TAGTCAAATGGCCAAGCCAG	eStops	YDR212W	TCP1	0	-2.31806	-4.28827	-2.22481
AGATCCAGCATTTACTAATT	eStops	YBL040C	ERD2	0	-1.19284	-3.01696	-2.2244
TCTCAAAATGAACATCCGCT	eStops	YJR089W	BIR1	0	-0.121571	-0.623328	-2.22429
AGACCCCAGCCACCATCAAC	eStops	YHR072W	ERG7	0	-0.900936	-2.26355	-2.21449
CCTTCAATACGCTAAAGAAC	eStops	YML125C	PGA3	0	-0.582877	-1.54094	-2.21198
ATACCAAACTTCTAACATAC	eStops	YMR094W	CTF13	0	-0.501054	-2.87555	-2.21105
GTTTCAAGCGGATTCATATG	eStops	YMR197C	VTI1	0	-2.372	-4.23738	-2.21085
TACCGTCAAGTAGCCATTCA	eStops	YLR291C	GCD7	0	-1.99446	-2.11362	-2.20977
CCTCGAGGAGTGTATACCAC	eStops	YBR202W	MCM7	0	-4.50131	-3.02444	-2.20924
ACCCATAATAAAGGGCAATT	eStops	YBR055C	PRP6	0	0.0680018	-1.33218	-2.20924
TGATACAAGAACATGACAGT	eStops	YBL097W	BRN1	0	-0.361796	-1.51663	-2.20917
GTATCTCAAGACGTTAGGTT	eStops	YBR256C	RIB5	0	-0.391189	-2.27734	-2.20865
CCTACAAAATAACAGCACAT	eStops	YDR196C	CAB5	0	-0.307983	-0.695347	-2.20696
GCCCTCGAAGCTCCGATATT	eStops	YBR055C	PRP6	0	-0.442568	-1.88501	-2.2057
TCTTCAAAGCGATCATCTTG	eStops	YAL043C	PTA1	0	-1.76062	-2.93216	-2.20492
CAGCCCAGTTGGTCAAACCG	eStops	YPL131W	RPL5	0	-2.08116	-2.95383	-2.20225
CTTCTCAATCCTTCATCAAC	eStops	YFL045C	SEC53	0	-1.61603	-2.35397	-2.20165
TCCAAACAGGATATTCAGGA	eStops	YNL312W	RFA2	0	-1.87343	-3.04955	-2.20006
ACTCTACAGAGTATGGGTGG	eStops	YIL019W	FAF1	0	-0.672201	-2.51267	-2.19917
TCTCTCAATCCACTTACGCC	eStops	YGR065C	VHT1	0	-0.30202	-1.46083	-2.19861
TCTTCCAATCGGTAATCGGC	eStops	YHR186C	KOG1	0	-1.88881	-2.88016	-2.19672
CCTTCAAACCGATGACATTT	eStops	YIR006C	PAN1	0	-1.37204	-2.55738	-2.1964
ACACCAATTGCTCTTCAATT	eStops	YPL010W	RET3	0	-2.92543	-3.52966	-2.1963
GTTCAAAAGCAAACCAGAGC	eStops	YGL123W	RPS2	0	-1.25627	-2.04181	-2.1962
AATTCCATAGCACAGGTTCT	eStops	YGL145W	TIP20	0	-1.87865	-3.05344	-2.1958
AGCTCAACGCTCCTTAGAGA	eStops	YBR136W	MEC1	0	-0.25239	-1.30801	-2.19371
GCTATCCAAGTCGCTGACGT	eStops	YLL008W	DRS1	0	-0.666501	-1.803	-2.19336
GGATCCAACCGAGTAGTTCA	eStops	YHR165C	PRP8	0	-1.04259	-2.10056	-2.19315
GACACCAGCCCTGGAAGGAC	eStops	YNR038W	DBP6	0	0.039324	-1.28005	-2.19266
CGCACCCCAAGCAACAAGAG	eStops	YKL165C	MCD4	0	-1.03152	-3.70098	-2.19194
TATTTACAGAAAATGTATAG	eStops	YCR093W	CDC39	0	-0.721602	-1.66049	-2.19031
ATTACAAAAACAGCAGGAGG	eStops	YDR473C	PRP3	0	-0.920611	-1.99092	-2.19015
ACCTTCAATATGCTCACTCA	eStops	YDR341C	YDR341C	0	-1.7129	-2.91018	-2.18876
CCAACGACAACTCGAAGAAG	eStops	YER008C	SEC3	0	-0.481762	-0.878679	-2.18787
TAAATGTCAAGACTTTGTTT	eStops	YGL137W	SEC27	0	-1.63554	-3.11946	-2.18608
ATTAGCCCACATTTGTACAT	eStops	YPL266W	DIM1	0	-0.811973	-1.92353	-2.18562
AATCAAAACGAAGAAAACAC	eStops	YNL216W	RAP1	0	-1.50382	-2.46293	-2.18472
AAGGTTCAGTTTGAAGGCGG	eStops	YER147C	SCC4	0	-0.47452	-1.18247	-2.18344
CTTTCCCAGTCTCTGACACG	eStops	YDR232W	HEM1	0	-0.0432257	-0.465968	-2.18324
CTGCCAGGCGATAAGACCAA	eStops	YBL020W	RFT1	0	-1.30532	-1.94885	-2.18263
CCACCATCTCCCCGGATGCA	eStops	YHR072W	ERG7	0	-0.634579	-1.82249	-2.18179
GTGCTACCAGATTAATGAGC	eStops	YIR012W	SQT1	0	-1.33119	-1.99702	-2.17947
CCACAAGCTCAGCTCCAGTA	eStops	YIL109C	SEC24	0	-2.44804	-2.49355	-2.17868
ATCTCAGATGGACTTAGCGA	eStops	YHR069C	RRP4	0	-0.661399	-1.70876	-2.17831
ATCGATCAATCTGCTATTAC	eStops	YGL008C	PMA1	0	-1.70234	-2.04415	-2.17823
AGCCCAATTGAAGAATTCTT	eStops	YLR195C	NMT1	0	-0.229107	-1.17556	-2.17743
GCTCTCCATTCAAACGTGCC	eStops	YLR106C	MDN1	0	-0.761599	-1.82094	-2.17626
ACAAGCAAATGCTATATCTT	eStops	YLR105C	SEN2	0	-0.28125	-2.24674	-2.17593
TCTGGTCAACCTCTCGTTAC	eStops	YNL251C	NRD1	0	-1.11213	-1.23646	-2.17266
AGGGCTCAACAACAAAACTG	eStops	YMR309C	NIP1	0	-1.38313	-2.01911	-2.17174
GTTCATCCAGTTATCTACGT	eStops	YER112W	LSM4	0	-0.11054	-1.53813	-2.1717
TTTATTTCAGGAGCAATTCA	eStops	YPR105C	COG4	0	-0.246016	-2.51577	-2.17166
AACACAAATTCCCACTACTT	eStops	YDR499W	LCD1	0	0.135159	-0.611885	-2.17114
GGAATCAACAATCCAAGGAT	eStops	YGL150C	INO80	0	-0.248308	-0.274908	-2.17066
GATCCCATGCGCCGTGTGTA	eStops	YOR373W	NUD1	0	-2.49137	-3.54494	-2.17001
AATCATCCATTGCCCATCTT	eStops	YPL126W	NAN1	0	-0.795917	-2.58677	-2.16977
GCTACACCAATCTACTAGGA	eStops	YBR102C	EXO84	0	-2.08153	-2.8444	-2.16868
ATCCCATTGCTCCAAACCCC	eStops	YKL203C	TOR2	0	-1.13256	-2.3913	-2.16679
AGGTTTCAAGCATGCCTAAG	eStops	YPL242C	IQG1	0	-1.75672	-2.54874	-2.1653
GGTCCAGGATCTGGATTATT	eStops	YOR262W	GPN2	0	-0.24327	-1.49775	-2.1619
CTCAACCCAAGCATCCCCGT	eStops	YJR045C	SSC1	0	-1.45295	-2.11509	-2.16081
ATGCCAAACAACACCACCAA	eStops	YJL143W	TIM17	0	-0.95557	-2.36519	-2.15917
GTAGTACCATAGGTACGATG	eStops	YMR296C	LCB1	0	-1.25581	-2.10528	-2.15863
AAACCAAACCGCACATGTAA	eStops	YOR056C	NOB1	0	-0.752199	-1.49269	-2.1584
TTTATTCAAAATAACTACAC	eStops	YNL313C	EMW1	0	-0.836493	-1.32478	-2.15755
GTCTCCATGGTAGTACTTCT	eStops	YIL150C	MCM10	0	-1.69994	-2.67679	-2.1575
CCGTACCAGCAACAGGGCAT	eStops	YIR006C	PAN1	0	-0.250745	-1.29717	-2.15644
CACCAATGGAGTGTCATGTC	eStops	YBR190W	YBR190W	0	-1.0058	-2.80424	-2.15643
CATTCCATTGTGAAACCCAG	eStops	YPR162C	ORC4	0	-1.95908	-3.25949	-2.15572
ATCCAATCAAGGTATTGCAC	eStops	YDR170C	SEC7	0	-1.56945	-2.81952	-2.15382
CATCCAAGAAAACTATGATA	eStops	YPL010W	RET3	0	-3.42228	-4.01318	-2.15012
ACCAACAACAGCAATCAACC	eStops	YMR047C	NUP116	0	-1.62782	-2.1918	-2.14862
TTATCAAAGGGTTACGCTCC	eStops	YBL023C	MCM2	0	-1.97584	-2.56487	-2.14763
CACTCAAACTTCGGATTCCA	eStops	YGR211W	ZPR1	0	-0.865936	-2.59004	-2.147
CTTGGTCAAATGGCTCCAAT	eStops	YDL140C	RPO21	0	-1.67906	-3.45411	-2.14607
ATTGTTTCAAGCTTCCACAA	eStops	YLR274W	MCM5	0	-1.61596	-3.39317	-2.14542
ATCATCAAAAAACAGCGTCA	eStops	YLR115W	CFT2	0	-1.74747	-2.55756	-2.14191
AACTTCGAGAGTATCAACGA	eStops	YLR117C	CLF1	0	-1.01767	-3.60656	-2.14081
CAGGCCAAGGTGAATTACCA	eStops	YPR048W	TAH18	0	0.000644969	-0.781381	-2.14008
AAGTATCAGGGCCAAGGTTT	eStops	YFL017C	GNA1	0	-0.734091	-1.70389	-2.13942
TCCTCAAACAAACTATTACC	eStops	YPL190C	NAB3	0	-1.23072	-3.09521	-2.13819
CTCCTCAAATCTCTGTTACA	eStops	YFR031C	SMC2	0	-1.17975	-2.95374	-2.13772
GCGATTCAATCGCGAATTAA	eStops	YPL242C	IQG1	0	-1.51818	-2.69629	-2.13711
CGAACCAAGCTGGAACAGAA	eStops	YBL076C	ILS1	0	-1.12013	-3.46067	-2.13673
GTCCATAACTCCATGTATAC	eStops	YER008C	SEC3	0	-0.411447	-2.30363	-2.13614
AAATTACGAGATCAGAACGA	eStops	YGR140W	CBF2	0	-1.77988	-3.41162	-2.13605
TACTCAAGAAATAAATGGTA	eStops	YER008C	SEC3	0	-1.22722	-2.13137	-2.13507
TACATCCCACACTTTCAACG	eStops	YCR072C	RSA4	0	-1.04888	-1.94192	-2.13466
CTATTCAATTATGGGATTAC	eStops	YDL145C	COP1	0	-4.4685	-3.58262	-2.13375
GGACCAGAATTCCACAGTCA	eStops	YLR347C	KAP95	0	-1.95581	-3.43046	-2.13167
TAACCAGAGGGTCGCCAGGG	eStops	YOR373W	NUD1	0	-0.998549	-2.51584	-2.12997
TTGTCCAAGTATGATATAGT	eStops	YPL007C	TFC8	0	-0.911087	-0.753084	-2.12825
TTACACCATTCACCCCTTTG	eStops	YBR004C	GPI18	0	0.0639221	-0.775151	-2.12666
GAAGTCCAACATTTGTCTGG	eStops	YDR091C	RLI1	0	-1.87903	-3.58466	-2.12618
AGCCCAGTTGGTCAAACCGT	eStops	YPL131W	RPL5	0	-0.939774	-3.28906	-2.12609
GGTCAATGGTGTCGTTTGGA	eStops	YDL055C	PSA1	0	-0.509765	-3.06234	-2.12549
GTTCAGAGCGGCTTTAATAA	eStops	YNL161W	CBK1	0	-1.25453	-2.29329	-2.12473
AACAACAAGATAAAGATGAG	eStops	YLR106C	MDN1	0	-0.603318	-1.5516	-2.12443
GTAGCACAAAATGTCGAGGC	eStops	YMR203W	TOM40	0	-0.309866	-1.23473	-2.12392
GGCGGACAAGGTACGCGGTT	eStops	YDL103C	QRI1	0	-0.4456	-1.56343	-2.11994
CATCAAGCAGTTAATGGTAG	eStops	YPR112C	MRD1	0	-0.704792	-1.88101	-2.11835
TATCTCCATATGTAAGTCTC	eStops	YOR116C	RPO31	0	-1.7979	-2.32967	-2.11824
AAATCCAGCAGATTCAAACC	eStops	YLR305C	STT4	0	-0.979803	-2.4748	-2.1177
GTTGACCAAATCAAGGATGT	eStops	YDR050C	TPI1	0	-0.246908	-1.60894	-2.11404
CCTCAGGCTACCGGAATTGG	eStops	YIR006C	PAN1	0	-0.349558	0.40232	-2.11399
GTTCAGGATGCTACCTCCAG	eStops	YHR085W	IPI1	0	-0.842719	-1.82268	-2.1136
ACACCAAGACAAACAGAGAA	eStops	YJL010C	NOP9	0	-0.54061	-0.687491	-2.11343
GAACCATAACTCATACAATG	eStops	YKR086W	PRP16	0	-0.840273	-1.37037	-2.11327
TTCCAAGATATTCTTCTCAC	eStops	YBL014C	RRN6	0	-0.784096	-2.12347	-2.11186
CGCTCAGCAATACTACCCAC	eStops	YJR046W	TAH11	0	-1.17993	-2.86733	-2.11118
TGGTCAGATTAAGACTATGA	eStops	YBR038W	CHS2	0	-1.80059	-2.41049	-2.10992
AGGGTCAGTTATCAACATTA	eStops	YMR239C	RNT1	0	-0.0202668	-0.782497	-2.10867
TGATACCATTCCCATAAGTC	eStops	YLR153C	ACS2	0	-1.50869	-1.89618	-2.09848
AACACCAGAACGATCCTTTA	eStops	YNL287W	SEC21	0	-2.9901	-2.73682	-2.09814
GCTCAAAATCCTCAGTATCA	eStops	YLR106C	MDN1	0	-0.914099	-2.2828	-2.09745
TAACTCAGCTAGAGGCTGGA	eStops	YLR106C	MDN1	0	-0.648021	-1.402	-2.09658
ATGCCACCAGTAATCTCTAC	eStops	YLR153C	ACS2	0	-0.9643	-2.33822	-2.09528
ATTTCTCAAAGTTTGTGGAA	eStops	YDR081C	PDC2	0	-0.703667	-1.89064	-2.09443
CTATTCAGGTTTCTGGGCGT	eStops	YDL141W	BPL1	0	0.351488	-0.98061	-2.0941
TTCCTCAACAAGTTCAAAAT	eStops	YPL122C	TFB2	0	-0.896299	-2.31844	-2.09323
AGTTGTCAAACTGATGGCAT	eStops	YKL144C	RPC25	0	-0.750518	-1.63284	-2.09182
CCGTTCCAGTCACCCTTCAA	eStops	YPR035W	GLN1	0	-3.13892	-3.35212	-2.09178
GTAATCCCACCATCTGAAAG	eStops	YGR060W	ERG25	0	-3.47873	-3.1223	-2.08892
ATGATACAAATACATGGTGT	eStops	YGR274C	TAF1	0	-1.50065	-2.79612	-2.08883
AAGTTTCAACACTTCAAGAG	eStops	YOR048C	RAT1	0	-0.819179	-2.06283	-2.08802
GAAGGTCAATGGGCAGAAAT	eStops	YBR049C	REB1	0	-1.72029	-2.28601	-2.08591
ATACATCCCAAATTTCAGAT	eStops	YHR165C	PRP8	0	-0.231328	-1.42543	-2.08446
TGACCATTGTTCATGGGTGA	eStops	YPL210C	SRP72	0	-0.655543	-2.58736	-2.08363
ATACCCAGCATAACCACTCT	eStops	YAR019C	CDC15	0	-1.4431	-3.20871	-2.08322
ACAACAAGATAAAGATGAGA	eStops	YLR106C	MDN1	0	-1.07123	-1.90152	-2.08158
AGTAGCCCATTGAATAGGGA	eStops	YGL065C	ALG2	0	-1.26127	-2.04806	-2.07965
CTGCCCAAACAAGCTTTGGT	eStops	YDR301W	CFT1	0	-1.72912	-2.03676	-2.07892
ACATCTCAAGATCTAACCAT	eStops	YGR274C	TAF1	0	-0.943486	-2.25673	-2.07609
GCTCAGTCTCAATCAGGTAC	eStops	YOR046C	DBP5	0	-0.311316	-1.00231	-2.07601
AACTTCCATGCATATAGCTC	eStops	YER147C	SCC4	0	-0.412444	-1.42468	-2.07455
AACCATAGTAGGCGCTTCCA	eStops	YPL076W	GPI2	0	-0.250781	-1.6984	-2.07413
AAAGTTCAAGATGTCAAGTC	eStops	YGL073W	HSF1	0	-0.646686	-1.74248	-2.07411
TATCCCAGGGAGCAGCACCT	eStops	YDL003W	MCD1	0	-2.60841	-3.51279	-2.07332
TACTTCAAAGTGTCAGAATA	eStops	YPR133C	SPN1	0	-2.52894	-3.61126	-2.07293
TTATCCAGTATTTGGGAAAG	eStops	YFL002C	SPB4	0	-0.235001	-1.28443	-2.07286
ACTCAAGGACCCATAAGAAC	eStops	YDR208W	MSS4	0	-2.15447	-4.93207	-2.07188
CTTCCAAAGCGCTATTCAAG	eStops	YIL144W	NDC80	0	-1.50623	-2.40428	-2.07118
GTTGTTCAATACATTGAGGA	eStops	YPR168W	NUT2	0	-1.6236	-1.38527	-2.07099
ACTACAGGAAGAAAGGCTCA	eStops	YGR030C	POP6	0	-0.658127	-1.55118	-2.07055
TGTCAAGATGAGAAGAAGGG	eStops	YPR176C	BET2	0	-0.137777	-2.22423	-2.0703
TTTGACCAAGAAGTAGAAAT	eStops	YLR397C	AFG2	0	-0.389219	-1.85276	-2.0699
AAGAACAGATTAACGAGGTT	eStops	YDR166C	SEC5	0	-0.263336	-1.58749	-2.06987
ACATTCCCAGGTAGTGAATA	eStops	YOR262W	GPN2	0	-0.641111	-2.34492	-2.06847
ACGATTCCAATTTATCTGGT	eStops	YCR093W	CDC39	0	-1.35536	-1.98213	-2.06842
ACTACAAGAAACAGTGTCCT	eStops	YBL105C	PKC1	0	-1.41058	-1.86879	-2.06802
TGATCAAAGGCGTGTACAAG	eStops	YHR172W	SPC97	0	-2.17817	-4.81729	-2.06764
CTACCAGGAACTAGCGTATA	eStops	YML031W	NDC1	0	-1.84933	-2.50143	-2.0672
CACCATGTTTCGGGCTTATT	eStops	YBL084C	CDC27	0	-1.28038	-2.77725	-2.06705
GGTTCACAAGAACAAGGTAT	eStops	YKL182W	FAS1	0	-1.83083	-2.49537	-2.06704
TTCTCAAGCAGAAAAAGGTT	eStops	YLR277C	YSH1	0	-1.97694	-1.76227	-2.06646
ATTGGATCAAGACACCTTAC	eStops	YLR166C	SEC10	0	-0.848247	-2.11125	-2.06622
AATTGCCCAGGCTTCATCCC	eStops	YNL258C	DSL1	0	-1.31831	-2.68504	-2.06518
TACGCACAAGGTTTGTCTTC	eStops	YDL029W	ARP2	0	-2.8171	-2.29605	-2.06515
AGATATCAAGAATTAAGAGC	eStops	YGR116W	SPT6	0	-2.30558	-2.27534	-2.06441
CCTCTTCCACGTGTTATTCG	eStops	YPL007C	TFC8	0	-0.811764	-1.5894	-2.06428
GTGCATCAGAAGAAGCAAAA	eStops	YMR128W	ECM16	0	-1.15374	-2.35251	-2.06413
CTTTCCAGGTCTTAAGTACA	eStops	YDL164C	CDC9	0	-0.270479	-0.865675	-2.06345
TTGCATCGAATATTACAAAT	eStops	YFL024C	EPL1	0	-0.399489	-1.66694	-2.06278
TGTACCAGAGCAATTCTTAT	eStops	YNL126W	SPC98	0	-1.36489	-3.66137	-2.06197
AGAACAGTTGATCAGTGGTA	eStops	YML085C	TUB1	0	-2.43099	-3.06678	-2.06186
GTACCTCAGGGCCAGAAACA	eStops	YIL062C	ARC15	0	-4.07353	-2.99236	-2.05752
GGTCCAGTCGCGTGCTGATA	eStops	YAR007C	RFA1	0	-0.717873	-2.33579	-2.05732
CATATTCAAACTGCCATGCT	eStops	YPR048W	TAH18	0	-0.262743	-0.912866	-2.0571
ATATTCAATTACAGTATGGG	eStops	YDL140C	RPO21	0	-2.18634	-3.98595	-2.05635
GATGCATCCAGTTTGCCCCC	eStops	YNL207W	RIO2	0	-0.459515	-1.35545	-2.05596
TTGTTCCATTGATAGTCCGA	eStops	YOR168W	GLN4	0	-1.47378	-2.64739	-2.05551
AAGCTACCCAGGTATTTCTT	eStops	YLR212C	TUB4	0	-3.32456	-3.68566	-2.05473
TTTCCAGGACTCCACAATAC	eStops	YNR053C	NOG2	0	-1.40693	-1.69941	-2.0526
TATATATTGAGAATAAGGGA	Ctr2	NA	NA	0	-1.78827	-1.59326	-2.05202
TTCCTTCAAAAACACGTTCT	eStops	YDR292C	SRP101	0	-1.28161	-2.84516	-2.05186
AGCTCAATTACAAATCGCTA	eStops	YNR016C	ACC1	0	-0.0419489	-1.9739	-2.05123
CAGCGCTCAAGAGAAGGCAT	eStops	YMR079W	SEC14	0	-1.12943	-1.87981	-2.0456
AGGACCAGGACTACGTTACG	eStops	YML015C	TAF11	0	-0.985657	-2.17133	-2.0428
GATCAGGATGTGACATTTAT	eStops	YBL014C	RRN6	0	-0.680397	-1.24249	-2.04261
GTTGCTCAGTGCAGTTCTTT	eStops	YIL068C	SEC6	0	-0.900499	-1.82059	-2.04144
GAACCAAGATATAATTACTT	eStops	YGR156W	PTI1	0	-1.61965	-3.62285	-2.04137
CACCCATGTTAGGATGGGCA	eStops	YKL004W	AUR1	0	-2.30655	-2.97309	-2.04106
AACGTTCCAGTCACGGGCAT	eStops	YBL076C	ILS1	0	-1.38749	-3.16039	-2.03947
ACACCACAAGATACTGACAA	eStops	YBR038W	CHS2	0	-2.78042	-2.82491	-2.03864
GATGCACAACTACCCACTTG	eStops	YOR250C	CLP1	0	-1.167	-1.79272	-2.03783
GACACAAAATCCACATGAGG	eStops	YOR244W	ESA1	0	-0.574636	-0.708119	-2.03694
AACTACAAAAAATTTATGAT	eStops	YLR086W	SMC4	0	-1.40546	-2.76736	-2.03596
AATCCAATCGATGCAAATAG	eStops	YOR160W	MTR10	0	-0.421018	-0.903653	-2.03533
CACTCAAAAACAAGAATCTG	eStops	YGR140W	CBF2	0	-1.00222	-2.57338	-2.0329
GGAATCCCAAATACCCTCGA	eStops	YDR188W	CCT6	0	-2.67938	-3.09306	-2.03138
CAAAACCCAAATACTTGTCT	eStops	YLR430W	SEN1	0	-0.441864	-1.19199	-2.03068
CTTCAATCTTTAGATTATGT	eStops	YFL002C	SPB4	0	-0.798761	-1.76209	-2.02907
GGTCAGGAGATTTCGGTATT	eStops	YNL163C	RIA1	0	0.181966	-0.495935	-2.02572
TCAACAACGTATGTCTAGGA	eStops	YDR325W	YCG1	0	-1.33517	-3.13311	-2.02567
ATGCCCAAGGTAGAACTTTG	eStops	YGL022W	STT3	0	-0.783105	-3.36246	-2.02553
AGCAACCCAATTGCCGGCAG	eStops	YPR103W	PRE2	0	-1.4687	-2.15698	-2.02511
CTTCCACGTGTTATTCGTGG	eStops	YPL007C	TFC8	0	-0.25117	-0.551581	-2.02078
TTGTACAAACACGAGGTTTC	eStops	YBR091C	TIM12	0	-0.294331	-1.10646	-2.02071
ATCCCATAATTGAATAGTAG	eStops	YDL145C	COP1	0	-2.22915	-3.38815	-2.01758
ATGCCCAATCCTCTCTGCAG	eStops	YJL090C	DPB11	0	-1.64174	-2.67864	-2.01675
TTCATTCCATTGTGAAACCC	eStops	YPR162C	ORC4	0	-1.56927	-2.23909	-2.01637
TTGCGTCAAGCTGTTATTAA	eStops	YOR341W	RPA190	0	-1.42079	-2.45749	-2.01619
GTACCATAACTTGTCTACTC	eStops	YLR117C	CLF1	0	-0.492657	-1.53979	-2.01615
AAAACAACTGACGAATAACT	eStops	YDR498C	SEC20	0	-0.985308	-2.82324	-2.01342
TATGATCCACAATATATTCA	eStops	YKL165C	MCD4	0	-1.09882	-3.0111	-2.01248
CCCCCAAATATTATGGTTCT	eStops	YGL150C	INO80	0	-0.35348	-0.974637	-2.01243
AATATCCCAGATAGAATACT	eStops	YLR066W	SPC3	0	-0.566666	-2.39429	-2.01195
AGACCTCCATGTCAATTCTG	eStops	YDR311W	TFB1	0	-1.45239	-2.60162	-2.01185
CATCTCAAGATCTAACCATC	eStops	YGR274C	TAF1	0	-0.539008	-1.69511	-2.01175
TAAAACAGGATCCATCCCTA	eStops	YNL313C	EMW1	0	-0.129496	-0.828271	-2.01175
CCTCCCAAAATCTTATTGTG	eStops	YNL006W	LST8	0	-0.53352	-1.682	-2.01103
TTTCCATATTACTTCTTCCA	eStops	YHR164C	DNA2	0	-1.0638	-2.20256	-2.011
CATCCAGTTTGCCCCCTGGT	eStops	YNL207W	RIO2	0	-0.158228	-1.37701	-2.00967
GTATTCAATGTCGTTATAAA	eStops	YBR049C	REB1	0	-1.29255	-2.80596	-2.00906
GTCCAAGCAAATTGTTTCAT	eStops	YHR118C	ORC6	0	-1.3664	-3.03223	-2.00776
AAGGCACAGGGTTCTTATGC	eStops	YDR325W	YCG1	0	-0.996617	-3.76361	-2.00599
ATTCAAAATGATGATATTAC	eStops	YJL087C	TRL1	0	-0.547016	-2.19554	-2.00481
GTTCAACAAGTCGTCATGGA	eStops	YGL150C	INO80	0	-0.917334	-0.832998	-2.00442
CCCATCCAAGCCAAGGTGGA	eStops	YPR041W	TIF5	0	-1.22589	-1.46345	-2.00324
ACATTCAGCAGTTACAGATT	eStops	YMR061W	RNA14	0	-1.65739	-3.19536	-2.00292
TTCCATATGGTGTAGAAGGC	eStops	YKL019W	RAM2	0	-1.47264	-1.10461	-2.00104
AACTAACCAAGCAACGTTGA	eStops	YLR249W	YEF3	0	-1.55789	-1.79729	-1.9995
GCGTCAACAACTGCAAGTAT	eStops	YPL231W	FAS2	0	-2.00327	-3.01535	-1.99949
TCCAACAAAATATCAAGTTT	eStops	YJL039C	NUP192	0	-1.10501	-1.90971	-1.99914
ATCCATAGTTCCTTATACAT	eStops	YBR257W	POP4	0	-1.35724	-3.13795	-1.99821
TCGTCAAGTTGTCACCCATC	eStops	YJL050W	MTR4	0	-1.05097	-2.35032	-1.99794
GCTCAATATGACTTCCATAA	eStops	YMR131C	RRB1	0	-0.879589	-2.28113	-1.99697
ATCTCCCCACGGTACTGTAG	eStops	YER172C	BRR2	0	-1.38942	-2.63554	-1.99674
CGTTCCAGCGTCTCCAATAT	eStops	YHR072W	ERG7	0	-0.569022	-2.4199	-1.99554
CCCACAACAAATGAACCCAA	eStops	YER165W	PAB1	0	-0.60294	-1.27172	-1.995
CGGTCAATATTCTATTCCTC	eStops	YMR288W	HSH155	0	0.124482	-0.820518	-1.99453
TTCTCCCACTTGAACGTTAA	eStops	YIL115C	NUP159	0	-0.462264	-1.56943	-1.99441
CATCCCAAGTTGGGTAAACA	eStops	YGR140W	CBF2	0	-1.35187	-2.22677	-1.99385
ATCCAAGAACTGAAAAAGGA	eStops	YKR002W	PAP1	0	-0.550084	-2.45427	-1.9934
TCTCAATGGGAATTCCAAGT	eStops	YPR035W	GLN1	0	-1.54099	-2.61658	-1.992
CCTTCCAGATGATCTCCTGC	eStops	YDR189W	SLY1	0	-1.67762	-2.39358	-1.99148
TGATCAGAAGGTTCCATGGG	eStops	YPL085W	SEC16	0	-1.14294	-2.76929	-1.99091
ATTCCACACTGTATCAACTC	eStops	YDR398W	UTP5	0	-1.47857	-2.55597	-1.99024
CATTCAAAACTTGCATACTA	eStops	YOL077C	BRX1	0	-0.68555	-1.86167	-1.98888
ACGTTCAATATGCCAAGGAA	eStops	YEL032W	MCM3	0	-1.30126	-1.97912	-1.98827
GTGGGCCCAGTACAATACGG	eStops	YHR068W	DYS1	0	0.388778	-0.628256	-1.98741
CTGTCAAAGCGACAAGATAT	eStops	YDL220C	CDC13	0	-1.02742	-2.27203	-1.98558
CACCACAAGAAGGCTTAAGT	eStops	YGR029W	ERV1	0	0.0132644	-0.445521	-1.98314
CCTCAATTCAATGCTATTAC	eStops	YFR031C	SMC2	0	-1.22446	-2.11208	-1.98198
TCACACAAGTCTCTTCCTGT	eStops	YBR234C	ARC40	0	-1.63756	-2.58012	-1.98011
CTTACAAGAAAGAAATAGGG	eStops	YLR026C	SED5	0	-2.73706	-3.39064	-1.97985
AAACCATTTCCTGATATACC	eStops	YBR265W	TSC10	0	-0.597223	-1.1404	-1.97966
ATTAGGTCAGGGATATAGGA	eStops	YJL039C	NUP192	0	-2.85268	-3.83177	-1.97883
ACCCATGCAAATGAGAATCC	eStops	YCR093W	CDC39	0	-0.577427	-2.53815	-1.97861
ACACTCAACCGAATAGCTTG	eStops	YDR118W	APC4	0	-1.70995	-2.7166	-1.9786
GCGTCTCAGGATCCAATTGG	eStops	YLR274W	MCM5	0	-2.11279	-2.63327	-1.97727
CCTCGAGTGGTGATTGTTGG	eStops	YOR250C	CLP1	0	-0.740257	-3.39182	-1.97499
TTTGCCACTGTCTCAGCAGT	eStops	YGL040C	HEM2	0	-0.105175	-0.883455	-1.97376
TGTAGCCCAACGGATTCTTC	eStops	YBR079C	RPG1	0	-1.31279	-3.33877	-1.97355
ATTCCAATCGTCCAATAAAG	eStops	YIL129C	TAO3	0	-0.200546	-1.65778	-1.97278
AATCCACGAATGTGAAAACA	eStops	YDR189W	SLY1	0	-2.11583	-2.82509	-1.97222
TGAACAACAGAAGATCGACA	eStops	YJL008C	CCT8	0	-1.30136	-2.30048	-1.97086
GTCTCAAGGTCTGTTTATAT	eStops	YGR278W	CWC22	0	-0.882534	-2.86449	-1.97062
AACCCATTTGCCTGATGTAA	eStops	YGL137W	SEC27	0	-1.7003	-2.70588	-1.97056
TTTACAGAAACAATTCAGAA	eStops	YPL209C	IPL1	0	-0.969534	-1.93981	-1.96866
AAGCCAATTACAATTATATA	eStops	YLL031C	GPI13	0	-0.741547	-1.58338	-1.96821
GATTATTCAAGGTTATAATA	eStops	YJL008C	CCT8	0	-2.18549	-3.04641	-1.9674
ACTAATCAAGATAAAAGTCA	eStops	YDR166C	SEC5	0	-0.296401	-2.09202	-1.96645
CTTCGAGGAATATACTCATA	eStops	YDR021W	FAL1	0	-0.437328	-1.40916	-1.9658
AGAGCTTCAAACGAATTTAC	eStops	YKL138C-A	HSK3	0	-1.17065	-1.98766	-1.96282
AAGTCGAGGAATTCTGATCG	eStops	YLR186W	EMG1	0	-0.135643	-2.4379	-1.96263
CAATACCAGTCATGGCTTGG	eStops	YJL081C	ARP4	0	-0.396905	-1.09657	-1.96031
ACTACAAAAGTCCTTATCTT	eStops	YKL182W	FAS1	0	-3.03047	-3.33076	-1.9596
GGTTTCCAAGCTAGTTCTGT	eStops	YHR068W	DYS1	0	0.0364065	-0.226396	-1.95863
CTATCTCAGCCCTTTCCAAA	eStops	YPL085W	SEC16	0	-0.918102	-2.18164	-1.95758
GCCACAGAACTGGGTCAAAC	eStops	YJL054W	TIM54	0	-0.64302	-1.24034	-1.95683
CCCGTCAAGTTAAGGATAGA	eStops	YBR142W	MAK5	0	-0.847939	-3.42555	-1.95645
AACTTACAGGATTATTTAAC	eStops	YGL073W	HSF1	0	0.562285	-0.450387	-1.95605
CATTCAAAGGCGTATAGAGG	eStops	YDR081C	PDC2	0	-0.413673	-2.32543	-1.95515
CAAATATCAAGATCCTTCAC	eStops	YKL196C	YKT6	0	-1.04475	-2.02046	-1.95447
ATCTTTACAAACTAAGGAGC	eStops	YGL137W	SEC27	0	-0.895292	-0.477378	-1.95388
GTTCAAAATGGCACCATAGC	eStops	YPL235W	RVB2	0	-0.754777	-2.39914	-1.95357
GCTCAACAAGTCTCCATCAC	eStops	YDR189W	SLY1	0	-1.75807	-3.01127	-1.95034
GCCCCACACCCCATTATATG	eStops	YPL190C	NAB3	0	-1.62475	-2.53662	-1.94998
AATTCAGCATTCCGACTCAC	eStops	YNL006W	LST8	0	-0.431009	-2.31721	-1.94981
GGATGTTCAAAGTTCTATAG	eStops	YCL031C	RRP7	0	-1.0224	-1.88283	-1.94979
CCATCAAATAAATAGCTCAA	eStops	YBL004W	UTP20	0	-1.21002	-2.32274	-1.94963
CAATACCAAAGGATGGGATA	eStops	YOR244W	ESA1	0	-0.336526	-1.58399	-1.94819
TTATCAGATTATAAAGCCAA	eStops	YCL004W	PGS1	0	-0.441853	-0.525116	-1.9459
CATCCAGGAACTAACGTATT	eStops	YDL165W	CDC36	0	-1.23702	-2.12462	-1.94192
TATCCCACTGTAGCCTATCA	eStops	YKL019W	RAM2	0	-0.466968	-2.10536	-1.94165
ACTACAAAGAAAGAAAAACT	eStops	YKL082C	RRP14	0	-0.0703318	-1.88026	-1.94117
CGTACTCAAGACGAAGAGGT	eStops	YJL014W	CCT3	0	-1.7759	-2.70217	-1.94048
GGTCCAAGTGAAGAAAGATA	eStops	YLR276C	DBP9	0	-0.909319	-2.44932	-1.93967
ATTAACCAGCGGTCGTAATG	eStops	YGL128C	CWC23	0	0.113711	-0.417568	-1.93908
GGGATCTCAAATCGAGAACT	eStops	YHR074W	QNS1	0	0.0895209	-0.810281	-1.93897
TGGTCAGGAGATTTCGGTAT	eStops	YNL163C	RIA1	0	0.0821403	-0.515042	-1.93869
AATGCCCAAGATACGAAAGC	eStops	YHR186C	KOG1	0	-0.40906	-2.08276	-1.93714
AGAGCTCAGGATGCCGAGGT	eStops	YJL111W	CCT7	0	-2.58776	-3.22164	-1.93565
ATACAAGGAGCTGAAAACTC	eStops	YLR336C	SGD1	0	-0.54763	-1.06785	-1.9356
TTGCTCCATTTATTGACGCT	eStops	YKL112W	ABF1	0	-1.54547	-2.08516	-1.93297
CCCATTCGAGTTCCGCTGGG	eStops	YHR197W	RIX1	0	-0.834849	-1.68869	-1.93294
CCTGCCCAGTGTCCATATAA	eStops	YDR460W	TFB3	0	-1.217	-2.00006	-1.93169
AAGTCCCACTGTTTAACTGC	eStops	YPL016W	SWI1	0	-0.329356	-1.56672	-1.93088
AAAACCAACCAGGGTTATCG	eStops	YGR116W	SPT6	0	-2.1554	-2.02476	-1.93063
CAAGACAAATTGGTTGGGAG	eStops	YCR093W	CDC39	0	-0.9707	-1.85254	-1.92961
GGCCCTCAAATGGCCTTGAG	eStops	YLR378C	SEC61	0	-2.37387	-2.34069	-1.92801
TTTCAGTATAACAGCGAGGC	eStops	YDL141W	BPL1	0	-0.680056	-0.775404	-1.92799
TCATCAACTCATAGCCAATA	eStops	YBL004W	UTP20	0	-1.22919	-2.43201	-1.92601
CGTGACTCCAATCACGGAAA	eStops	YKL045W	PRI2	0	-1.68775	-3.98542	-1.92578
TTCCATATTACTTCTTCCAT	eStops	YHR164C	DNA2	0	-0.460702	-1.45897	-1.92553
TGGTCAAAAAGGCAATGTAG	eStops	YDR177W	UBC1	0	-0.236998	-1.04963	-1.92547
CATCGCTCAAGGTCACAACC	eStops	YPL252C	YAH1	0	-0.750402	-1.21351	-1.92519
TGGTCAAGTCAAGCAAGTTA	eStops	YBR011C	IPP1	0	-0.80914	-2.33723	-1.92515
CTCTCAAGCCACGTGGGTTG	eStops	YLR060W	FRS1	0	-2.26163	-2.49966	-1.92489
AATGCTCAAGCCCAACCTGC	eStops	YDR172W	SUP35	0	-1.32723	-3.00536	-1.92333
GTTCGAGTCAGCTCTGTAAT	eStops	YDL120W	YFH1	0	-0.133655	-1.21887	-1.92021
ACATCAAAGGCAGCTTTATG	eStops	YOL130W	ALR1	0	-1.10109	-2.91812	-1.92014
AATCTCAAAAGAACAACAGA	eStops	YDR324C	UTP4	0	-1.0206	-2.23	-1.91982
AACTCAAACCGGTGATGATG	eStops	YDL031W	DBP10	0	-0.276786	-0.20456	-1.91965
ATAGTCCATGGGGGATGGAA	eStops	YDR464W	SPP41	0	-1.72728	-2.26023	-1.91931
ACTCAAAGGGCCACTTCCTC	eStops	YDR398W	UTP5	0	-1.31016	-2.6493	-1.91898
ACTTCTCCCAAATCATATCA	eStops	YGR278W	CWC22	0	-1.18791	-2.28782	-1.91853
CTATCAAGATAAGTTAGTTG	eStops	YMR076C	PDS5	0	-0.856182	-1.79273	-1.91835
ATGGCCCAAGCCACACCACC	eStops	YKR002W	PAP1	0	-2.09902	-2.99612	-1.91818
ATACCCCATTGTAACATAAA	eStops	YKL182W	FAS1	0	-2.89262	-2.39187	-1.91537
AAATTTCCAAGATTATTTAC	eStops	YML065W	ORC1	0	-1.03897	-2.35616	-1.9152
GGAATGTCAGGTGATAGCAG	eStops	YDR325W	YCG1	0	-0.778205	-2.22444	-1.91499
CGGTCCATTGTAAAGCTATT	eStops	YKL182W	FAS1	0	-2.47806	-3.17146	-1.91488
TTTCAACACAATGAAAAAAA	eStops	YDR299W	BFR2	0	-0.750606	-1.79864	-1.91308
TACCCCAGCTTGGAAGCTTA	eStops	YFR002W	NIC96	0	-1.7818	-2.71669	-1.9094
ACCACAAGAGGACCATCCAA	eStops	YFR028C	CDC14	0	-0.946749	-3.01966	-1.90842
GGATCAGGATGCAATCAGAG	eStops	YLR166C	SEC10	0	-1.45016	-2.42936	-1.9072
AGGCCCAAAAAGGGGATACT	eStops	YBR055C	PRP6	0	0.0327938	-1.6395	-1.90622
CATGTCCAAGGATCCAATTC	eStops	YLR022C	SDO1	0	0.225839	-0.181831	-1.90373
GTCCAGCCCAAGTCCATTAC	eStops	YGR065C	VHT1	0	-0.145621	-1.77175	-1.90347
GGGACAAGGTTCTCACGACT	eStops	YER168C	CCA1	0	-0.0877454	-1.67107	-1.90145
TGTTTCAGAAAGGAGAGGTT	eStops	YJL031C	BET4	0	-0.283723	-2.02376	-1.90141
TCTTACAAAGTCAGGGTAAA	eStops	YER006W	NUG1	0	-0.709531	-1.01752	-1.89985
ATTCCAGTTTGGTCTTGGTC	eStops	YNL026W	SAM50	0	-0.155183	-1.01576	-1.89958
TCCTCAAACAGAATTCCACA	eStops	YGL245W	GUS1	0	-1.08932	-2.37107	-1.89958
GGCGTACGACATCTTACCAA	eStops	YPL175W	SPT14	0	-0.970823	-2.00987	-1.89776
ATGCCAAGACAGGCAATTGA	eStops	YBR234C	ARC40	0	-2.02422	-2.38228	-1.89427
AATCAAAGAGACTCCCAGTT	eStops	YDR356W	SPC110	0	-1.99516	-2.66199	-1.89323
ACCTCAATTTAGAAATGGTC	eStops	YER165W	PAB1	0	-1.06321	-1.58637	-1.89313
AACTTCAGCAAGTGCCGCAG	eStops	YPR104C	FHL1	0	0.0184951	-1.12693	-1.89302
ACACTCCACATAACGTGGGC	eStops	YOR063W	RPL3	0	-1.93473	-2.02238	-1.89279
CCTTCCACAACGTAACGTGA	eStops	YER082C	UTP7	0	-2.01316	-2.61088	-1.89214
TTAACTCAAATATTAACGCC	eStops	YDR292C	SRP101	0	-0.209846	-0.530703	-1.89102
CAAATCCATGCACTTTCTTC	eStops	YKL144C	RPC25	0	-0.791303	-2.40945	-1.89095
AAACCCATGGCTCAGTAGGA	eStops	YGL137W	SEC27	0	-2.55825	-2.40491	-1.89022
GATATCAATCCCATAAATCA	eStops	YGL073W	HSF1	0	-0.537877	-2.52874	-1.88963
GAGACCAAATGGTCGTTGGC	eStops	YFR004W	RPN11	0	-1.63257	-2.56714	-1.88837
TGCTGACCAACGATCTAGAT	eStops	YLL004W	ORC3	0	-0.707075	-1.78314	-1.88815
GAAAACAGAGGCGGGTAGAC	eStops	YHR102W	KIC1	0	-0.937662	-2.1936	-1.88787
CAACCAGGCTAAAATACGTT	eStops	YHR019C	DED81	0	-0.922003	-2.71407	-1.88693
AAACCCAAGGTCTGGAGGGG	eStops	YDL145C	COP1	0	-3.23303	-3.22787	-1.88651
AGTTCAGGTTGGATTAGTAG	eStops	YML064C	TEM1	0	-1.83848	-2.57603	-1.88639
ATGGTCAAATGTATACTTAT	eStops	YBR236C	ABD1	0	-0.90838	-2.86422	-1.88562
TTCTCGTCAACTTTATGTGT	eStops	YKL210W	UBA1	0	-0.637172	-2.09626	-1.88426
TTATCAAGAAGATATGGCCA	eStops	YBR038W	CHS2	0	-1.87871	-2.61867	-1.88335
CTCTCAAGAGGAGGAAACTG	eStops	YML043C	RRN11	0	-2.12226	-2.41875	-1.88215
CTTCAAATGTTAGGTAGAGC	eStops	YER172C	BRR2	0	-0.250322	-1.89996	-1.88202
TTTCCCACGCCCCAGTCTCT	eStops	YGL130W	CEG1	0	-0.37874	-2.99484	-1.88162
CTCTCAATTGGAAGAGACTA	eStops	YER165W	PAB1	0	-1.13069	-1.88774	-1.88113
AGATCAGGACGTTGAAGGAG	eStops	YNL124W	NAF1	0	-0.326919	-0.517431	-1.87976
ATGTTCCCAAAATCAAACAA	eStops	YBR202W	MCM7	0	-1.72386	-2.46626	-1.87948
TCGATCCAGGAATTTCCCGC	eStops	YGR211W	ZPR1	0	0.0562173	-0.958055	-1.87887
GAGCGCCCAGCAAAAGTTAC	eStops	YDL087C	LUC7	0	-0.788259	-0.869123	-1.87654
ATGCTCAAGAGGGTGGTAAC	eStops	YDL195W	SEC31	0	-0.390555	-2.28511	-1.87583
GACTCCAGTTCAAATGGATT	eStops	YDR082W	STN1	0	-0.994324	-2.15845	-1.87536
ATGTCCCATTTCCAAACCAG	eStops	YNL118C	DCP2	0	-1.3976	-1.13633	-1.87317
GGTAGCCAGGAATCAGTACC	eStops	YPR025C	CCL1	0	-0.721708	-1.98934	-1.87095
TGAACAATATGTAAGGAGTA	eStops	YGR098C	ESP1	0	-0.91737	-2.48956	-1.87081
CTCACAGGATGGCTCCGTTG	eStops	YPR183W	DPM1	0	-0.7867	-2.06272	-1.87048
GTAGTTCCATATGGTGTAGA	eStops	YKL019W	RAM2	0	0.421597	-1.35445	-1.87032
CTCTCAAAGTAAAAGCGATG	eStops	YOR098C	NUP1	0	-0.158563	-1.1897	-1.86981
ATGTATATGGTATATGTGAG	Ctr1	NA	NA	0	-0.59679	-1.43434	-1.86979
GTCTCCCAAGCTGATTTCCC	eStops	YIL078W	THS1	0	-1.02514	-2.05062	-1.86942
TTGGGGTCCATAACAACCGA	eStops	YIR015W	RPR2	0	-0.894861	-1.85043	-1.86923
AAGATCAACTTCAGGAGAAA	eStops	YPR025C	CCL1	0	-0.303944	-1.03937	-1.86883
ACACCAAAACATTGCCCTAC	eStops	YEL032W	MCM3	0	-1.10753	-2.57571	-1.86853
TAAAGTCCAATTGGTTATTG	eStops	YIL126W	STH1	0	-1.02755	-1.96584	-1.86846
TGAACCAGTCCTTCCAGGGC	eStops	YNR038W	DBP6	0	-0.0750438	-1.04941	-1.86839
ACACACCACTGTCTTAGTAG	eStops	YHR186C	KOG1	0	-1.08084	-2.41842	-1.86797
TCTCAATCCATTGAAAAAGC	eStops	YJR016C	ILV3	0	-0.299044	-0.996542	-1.86724
TCTCAAACAACCCAATTGGC	eStops	YPL231W	FAS2	0	-1.62968	-2.83722	-1.86601
TCAACCCATGTGAGCATATC	eStops	YPR110C	RPC40	0	-1.55506	-2.37964	-1.86588
ATAGAACAATTCATGATCAG	eStops	YLR007W	NSE1	0	-0.125062	-1.93517	-1.86538
ACAAGCAAAATGTAATGCTT	eStops	YNL152W	INN1	0	-0.0590313	-0.967333	-1.86537
CCAACAGGACAAGTATCAAA	eStops	YPL210C	SRP72	0	-1.37479	-2.48447	-1.86535
GTTTATCCATATCTTCGTTG	eStops	YMR076C	PDS5	0	-0.849859	-1.82584	-1.86527
TTCTTTCCATTCCTTGGCAT	eStops	YDR002W	YRB1	0	-1.82931	-2.7761	-1.86371
TCGCATCAAAAAAGAGACCT	eStops	YDL087C	LUC7	0	-0.389719	-1.83066	-1.86358
AATCAGATTAATATGTTATA	eStops	YIL106W	MOB1	0	-1.06734	-3.12869	-1.86134
AAAGTCCAAGTCCCGCCAAA	eStops	YGL092W	NUP145	0	-0.307368	-1.2531	-1.86123
CCACCAACTACCGCTTATCA	eStops	YDR499W	LCD1	0	-0.060495	-0.82177	-1.86018
GCACAACAAAATCTATTGGA	eStops	YDL145C	COP1	0	-1.38697	-1.8707	-1.8595
CGTTCAATCAAAGGAAGACA	eStops	YLR060W	FRS1	0	-0.83634	-1.89564	-1.85837
CATTCAGATAAACAATGAAA	eStops	YML031W	NDC1	0	-1.63212	-2.68562	-1.85836
TTGATTCAACAGCTTTCTAT	eStops	YCR057C	PWP2	0	-1.01262	-2.51722	-1.85693
TGCCACAAGATGAAAATAGT	eStops	YDR416W	SYF1	0	0.181067	-0.77621	-1.8563
ATTACAAAAATTAAGTGAGG	eStops	YPL228W	CET1	0	-1.4198	-1.63112	-1.85523
GGATGCCATGCTATCTTATT	eStops	YDR407C	TRS120	0	0.154257	-0.821378	-1.85473
GATCAGCGTGCCGGTAGGGC	eStops	YNR011C	PRP2	0	0.380073	-1.16252	-1.8543
GTCCAGATGCCTAAAGTGGA	eStops	YIL147C	SLN1	0	-0.755218	-1.6051	-1.85382
TTTACAAGATGAGTTACATA	eStops	YLR272C	YCS4	0	-0.943725	-2.36749	-1.85366
GCGTCAACCATTCTTGAGTA	eStops	YFL024C	EPL1	0	-1.35598	-2.78045	-1.85313
CATCTCAGATGGACTTAGCG	eStops	YHR069C	RRP4	0	-1.41981	-2.82564	-1.85144
GTCGTTTCAATTCCTATTCT	eStops	YLR336C	SGD1	0	-0.264015	-1.69851	-1.84914
GTTCCAGACAGAATCCGGTT	eStops	YIL143C	SSL2	0	-2.19719	-3.19689	-1.84908
TTGCCATATAGTCATATCAG	eStops	YPL085W	SEC16	0	-0.538375	-1.28877	-1.84838
ATCTCAACCTACTATTGAAG	eStops	YPL231W	FAS2	0	-2.17576	-3.78153	-1.84748
TGCCAAGGTTGGTTATCTAA	eStops	YOL133W	HRT1	0	-0.152614	-0.566651	-1.84721
TTCGCCAAGCGTTGAACAGT	eStops	YLL003W	SFI1	0	-1.29446	-2.37525	-1.84705
TTTGCAAGAAGACTATATTA	eStops	YDR394W	RPT3	0	-1.63858	-2.152	-1.84511
CCTACAGGGAGCAAGCAACA	eStops	YKR037C	SPC34	0	-3.03004	-2.44016	-1.84348
AAAGTCAAATGAGTAAATAC	eStops	YLR196W	PWP1	0	-0.914633	-1.84128	-1.84254
CTAATCAATTGGACGTCAAT	eStops	YFL029C	CAK1	0	-0.062935	-0.779369	-1.84209
CAAACCAGGTCCAGTTTAGC	eStops	YKL078W	DHR2	0	-0.467586	-1.53849	-1.84158
CTACCTCAATATATTATCCA	eStops	YLR071C	RGR1	0	-1.00635	-0.916724	-1.84096
ATCTCAAGATCTAACCATCG	eStops	YGR274C	TAF1	0	-1.34373	-2.40408	-1.84078
AAAACAGGATCCATCCCTAT	eStops	YNL313C	EMW1	0	-0.175345	-1.0703	-1.84018
TATATCCCATAGTAAAGTTA	eStops	YLR106C	MDN1	0	-0.826569	-2.86792	-1.83908
CAATCAGTTGAATCTCTTAC	eStops	YPL082C	MOT1	0	-0.258915	-1.75284	-1.83862
TAAGACAGGTTGCGAAATTG	eStops	YGL001C	ERG26	0	-1.34603	-2.38991	-1.83808
TAATGCGATATGATACTTAT	eStops	YPL151C	PRP46	0	-0.530529	-2.4595	-1.83633
TCATACCAAGCACCCAAGGT	eStops	YKL112W	ABF1	0	-2.89903	-4.37743	-1.83625
ATTGTTCAACTAACGGGAAA	eStops	YOR370C	MRS6	0	-0.376796	-1.72806	-1.83501
CTCGTCAAGATTCAACATCA	eStops	YLR166C	SEC10	0	-1.38297	-2.56049	-1.83477
CAATACCAGCAATATATTTA	eStops	YOR341W	RPA190	0	-0.585058	-0.945081	-1.83426
GTTGGTCAACAAATTATTTC	eStops	YOR116C	RPO31	0	-0.414563	-1.20334	-1.83288
TCTTCCAGCGAATTCTTGGT	eStops	YGR280C	PXR1	0	-1.15455	-1.70065	-1.83264
TGACCAAGAAATGGATTCAA	eStops	YIR012W	SQT1	0	-0.208947	-1.55545	-1.83159
GAAGTACAAGAAGCCAAGAA	eStops	YGR245C	SDA1	0	-1.51625	-2.28122	-1.83019
AACAACAACGATTGGAGGCT	eStops	YER006W	NUG1	0	-1.54142	-2.4958	-1.82989
AATAGTCAAGGCAAAGCTTC	eStops	YIL147C	SLN1	0	-0.413787	-1.69036	-1.82963
CTAACCCAGTTGTGACCAGA	eStops	YLR249W	YEF3	0	-1.43387	-2.6453	-1.82933
ATCACGATATCTACTATTTA	eStops	YHR102W	KIC1	0	-1.19264	-2.66647	-1.82797
AGACTCCCAGTTGGGCTCAA	eStops	YDR356W	SPC110	0	-1.58791	-2.19019	-1.82726
GTATTCAAATTAGATCTGTC	eStops	YPR010C	RPA135	0	-1.7953	-2.2555	-1.82616
TCTCAAAAGTATGTACAAGT	eStops	YER093C	TSC11	0	-0.442803	-2.96348	-1.82548
TACCTCAAGTGATGGGTACG	eStops	YMR236W	TAF9	0	-1.35391	-1.90557	-1.82292
GAGAGTCAGATAACAATTCA	eStops	YHR164C	DNA2	0	0.325279	-0.708669	-1.8221
ATCTCCAGCCTGCTAGACCA	eStops	YGR065C	VHT1	0	-0.558827	-1.87856	-1.8176
TCCTCAATCCAGCTTGTCTA	eStops	YPR168W	NUT2	0	-0.93132	-1.64174	-1.81733
CAGCCAACTAGATCTTAACA	eStops	YLR397C	AFG2	0	-0.944041	-1.66973	-1.81568
CACGCTCAAAAGGCTATCTC	eStops	YHR007C	ERG11	0	-2.03011	-3.10851	-1.81566
CTTTCCAAGACTTCCGTGAG	eStops	YMR288W	HSH155	0	-0.860071	-2.49229	-1.81452
AGACCAGACCTGAGCAGATT	eStops	YOR336W	KRE5	0	-0.290555	-1.19993	-1.81383
CAAGTATCAGGGCCAAGGTT	eStops	YFL017C	GNA1	0	-0.200135	-0.762986	-1.81346
GGGTCAGTACCTGGTATGCA	eStops	YPR183W	DPM1	0	-0.198645	-1.5394	-1.81304
GACTGCCAGTGGCTTGGAAC	eStops	YMR240C	CUS1	0	0.210234	-1.30313	-1.81264
AGAGCTCAGGTGACCAGAAC	eStops	YDL105W	NSE4	0	-0.224172	-1.40398	-1.81233
TTCATTCAATGTGTCTTGTC	eStops	YHR019C	DED81	0	-0.56622	-2.26159	-1.81182
ACTACAGGAGGATTTGTCAA	eStops	YPR019W	MCM4	0	-0.648682	-1.3802	-1.809
CGCTCTCCAGAAAATTTGTT	eStops	YLR378C	SEC61	0	-1.48003	-2.44103	-1.80842
AGCTCAAAAAGAGCTTGAAT	eStops	YGR103W	NOP7	0	-0.151169	-1.40135	-1.80827
ACCACAAGCGATTCAAAAGA	eStops	YOR206W	NOC2	0	0.0865276	-1.39438	-1.80815
AACTCAAACATTAGGTCCCA	eStops	YDR211W	GCD6	0	-1.26677	-2.55473	-1.80814
ACTCAGAATAGGTCACAACA	eStops	YLR163C	MAS1	0	-1.12099	-1.2708	-1.80673
TTTCAGCAGCATGAATTAGT	eStops	YPR104C	FHL1	0	-0.197117	-0.910913	-1.80667
CTTCAAATGGAATCGTTGCT	eStops	YOL069W	NUF2	0	-1.88265	-2.86361	-1.80645
ATTCAAATTAACAAGGAAAT	eStops	YJL074C	SMC3	0	-0.416566	-1.44185	-1.80522
AGTTCAATCTGATGAGAACA	eStops	YPL243W	SRP68	0	-0.965275	-2.92397	-1.80496
TCAACAGAAGAGCGATGCCA	eStops	YHR019C	DED81	0	-1.46728	-2.84241	-1.80348
ATCAGCAGGATGTGTTGAAG	eStops	YNL221C	POP1	0	0.00462955	-1.8075	-1.80305
AGAACAAGAACTGTCTTCCA	eStops	YGR246C	BRF1	0	-0.860388	-1.69431	-1.8029
ATAACTCGATGCTTCATCAG	eStops	YNR011C	PRP2	0	-0.517871	-1.69201	-1.8023
TTTCCATAGCCTATATATTA	eStops	YDR499W	LCD1	0	0.0237318	-0.596548	-1.80209
TTCTCCAGGAAATTCCTGAT	eStops	YGR090W	UTP22	0	-0.891749	-2.51353	-1.80154
GGAACAAACACTCTTGAAGG	eStops	YER147C	SCC4	0	0.13977	-0.498498	-1.80143
GACCTCCATGTCAATTCTGC	eStops	YDR311W	TFB1	0	-1.71102	-2.73749	-1.80126
GTCCTTTCAGCATTCTGATG	eStops	YGL130W	CEG1	0	-0.809629	-1.89644	-1.80073
TTTGACCCAATCTTTGTAGT	eStops	YDR023W	SES1	0	-1.80903	-2.91073	-1.79997
TATACAAAAAAAGGATAACA	eStops	YOR098C	NUP1	0	-0.117699	-0.939412	-1.79962
TTACCAATGCTTCCCTCTAC	eStops	YHR188C	GPI16	0	-0.203626	-1.32692	-1.7994
AAGGGGAGGGGAAAAGGTAA	Ctr2	NA	NA	0	-1.17876	-0.629462	-1.79921
TCTCAGGAAACCTTATCCAG	eStops	YNL262W	POL2	0	-1.53564	-2.46641	-1.79908
TCCGTTTCAACAAGTTGTTA	eStops	YDR468C	TLG1	0	-0.233944	-0.868225	-1.79888
GCCCTCAAATGGCCTTGAGC	eStops	YLR378C	SEC61	0	-1.76991	-2.45477	-1.79812
TTTGCCCAGGTGGACGGTCA	eStops	YJL174W	KRE9	0	-1.74704	-1.64871	-1.79811
GTATCAATTCTACTCCCCTG	eStops	YGR090W	UTP22	0	-1.5751	-2.25415	-1.7977
TCACTCAAAATGAACAGCAA	eStops	YPL243W	SRP68	0	-1.72063	-2.34302	-1.79713
ACCTCAGTCTGTAGATTTCT	eStops	YGR048W	UFD1	0	-0.645666	-2.04194	-1.79701
GCCCCAAAAGGGTTCTGGTA	eStops	YML025C	YML6	0	-0.314574	-0.308752	-1.79597
CTTCCATATGTTTGGCCTAA	eStops	YAL001C	TFC3	0	-0.133572	-0.79172	-1.79583
TTTCCAGATCTCTTCTCCCA	eStops	YKR068C	BET3	0	-0.761581	-3.08811	-1.79581
ACTACGACAAAGGTTCCAAT	eStops	YNL267W	PIK1	0	-0.62188	-1.49048	-1.79558
TATCCATACAAGATCATAAT	eStops	YDR235W	PRP42	0	-0.820612	-2.91352	-1.79432
GCCACTCAGCTATTAGAAAG	eStops	YFR031C	SMC2	0	-0.705426	-2.56865	-1.79387
ATATCACAAAGCAAGGACGA	eStops	YOL022C	TSR4	0	-0.37792	-2.21159	-1.79343
TCTCAGGTCGATGAGTCTCG	eStops	YJL167W	ERG20	0	-0.123872	-1.21257	-1.79293
AGTGGCTCAAATGGAACAAG	eStops	YBR087W	RFC5	0	-0.0986495	-0.325275	-1.79285
AAACTACAGGATAATATCTT	eStops	YBR136W	MEC1	0	0.273543	-0.911751	-1.79285
CCTCAAACAAACTATTACCA	eStops	YPL190C	NAB3	0	-1.05126	-2.17019	-1.79119
ATTTCCCATAGGTGCGACTT	eStops	YKR025W	RPC37	0	-1.27076	-2.65311	-1.78911
ATCCCACTTAGAGTAATCAA	eStops	YDR168W	CDC37	0	-0.72488	-2.21551	-1.78743
ATTAGACAACTCGTTCAAGA	eStops	YGL171W	ROK1	0	-0.256406	-0.978717	-1.78713
CCCACAATCCGCATACGTGA	eStops	YFL008W	SMC1	0	-0.554671	-1.64674	-1.78699
ATGAATCAGGAAGACAACAC	eStops	YPL255W	BBP1	0	-1.61803	-1.67431	-1.78675
ATTTCAAGGCGGTATTATTG	eStops	YPR103W	PRE2	0	-1.96152	-2.36828	-1.78614
TGAGATCCACATTTGTTGGA	eStops	YFL039C	ACT1	0	-1.98126	-4.01849	-1.78612
CTTCCACACAGTACGGGCCA	eStops	YGL001C	ERG26	0	-1.82614	-3.22675	-1.7855
TTTCTCCCAAGAGGTGTCTA	eStops	YHR020W	YHR020W	0	-1.16208	-2.56815	-1.78384
AAAGTATCAAGAAAATTCCT	eStops	YBR136W	MEC1	0	0.861318	0.253097	-1.77946
CGGATACAACAGAATAGTAC	eStops	YIL046W	MET30	0	-1.6414	-2.42827	-1.77866
CTTAGCCCAGATAGATACAG	eStops	YDR267C	CIA1	0	-0.0915696	-0.810459	-1.77808
GGTCAAGCTGGTTGTCAGAT	eStops	YML085C	TUB1	0	-2.08447	-2.36682	-1.77743
AACTCCTCCATATATATCTT	eStops	YER021W	RPN3	0	-1.10569	-2.23401	-1.77685
TGCCCACCAATCGACAGCTT	eStops	YBL105C	PKC1	0	-1.20161	-2.47544	-1.77555
TCTCAGTTCTCTAAATTAGT	eStops	YLR127C	APC2	0	-0.883216	-2.01849	-1.77526
CCAACAAGTGATAGCTTCCA	eStops	YJR046W	TAH11	0	0.0629582	-1.53904	-1.77266
CGTCAAGAAGCCCAAAGATT	eStops	YIL143C	SSL2	0	-1.82781	-2.86379	-1.77232
TATTCCCAAGAAACGCAGCA	eStops	YIL075C	RPN2	0	-1.17293	-2.30097	-1.77205
GGAACAAGGCGTTGATGCAA	eStops	YER006W	NUG1	0	-0.447855	-1.26462	-1.77181
TGTCCAATTAGCTCCCGGTA	eStops	YGL097W	SRM1	0	-1.04681	-2.98218	-1.77093
AAAACAAGGTGTCACCTCAT	eStops	YML092C	PRE8	0	-2.57246	-2.39247	-1.77056
CTGCGTCAACTATCTGATGG	eStops	YNR016C	ACC1	0	-0.682556	-2.15385	-1.7704
CTCCCAATCAAAAACTGTAA	eStops	YHR186C	KOG1	0	-1.24718	-1.93679	-1.76995
AAAACAAATTGATAGCACAG	eStops	YKR063C	LAS1	0	-0.161304	-0.3615	-1.76938
GAACAACAGGATGAAATTGA	eStops	YBR247C	ENP1	0	-1.38109	-2.54055	-1.76928
TCGCTCAGCAATACTACCCA	eStops	YJR046W	TAH11	0	-1.10133	-2.91168	-1.76924
ACCACAACCAGATTGGTCAG	eStops	YNL189W	SRP1	0	-1.04698	-2.34725	-1.76827
AGACCATAATCTATGGTAAC	eStops	YGL055W	OLE1	0	-1.47779	-2.1813	-1.76766
GGTCCAAGCTGCCTTGTGAC	eStops	YDR164C	SEC1	0	0.263937	-1.19654	-1.76635
CTTCAATACGCTAAAGAACT	eStops	YML125C	PGA3	0	-0.868594	-1.54869	-1.76505
TGTCCGAGTATCTATAGACA	eStops	YNL262W	POL2	0	-0.253254	-1.47119	-1.76342
TTGGATCAAGAACCACCTGC	eStops	YBR055C	PRP6	0	-0.148285	-1.51136	-1.76265
GTGCCAATGGTCGACTTGGG	eStops	YDR182W	CDC1	0	-0.212019	-2.59051	-1.76245
TTTGGGTCAAAGAGCTATTC	eStops	YNR016C	ACC1	0	-0.478979	-1.9075	-1.76207
CCAAGGCCCAAAAATAGGTG	eStops	YGL001C	ERG26	0	-1.63876	-2.28704	-1.7604
TATATCCAAATGGAAGCAGA	eStops	YDR301W	CFT1	0	-0.925079	-1.50549	-1.76036
AAGGACGATCTCACATAAGC	eStops	YDR141C	DOP1	0	-1.17587	-2.00064	-1.75967
ATTGAACAAATCAGAGATTT	eStops	YLR291C	GCD7	0	-1.05236	-2.50639	-1.75807
ATTACAAATTATAGTGGATT	eStops	YDR166C	SEC5	0	-0.336785	-1.00849	-1.75721
ATGGGACAAGGTGTATCATC	eStops	YDL007W	RPT2	0	-0.966536	-1.97738	-1.75683
GCACCACAACTACCCATTCC	eStops	YLR008C	PAM18	0	-0.749274	-1.2256	-1.75678
TTTCCAGTACCTGTTTGAAA	eStops	YJR046W	TAH11	0	-0.596929	-2.40099	-1.75673
ATGGACAGGATATATTCTTC	eStops	YAL001C	TFC3	0	-0.60025	-0.932606	-1.75628
ATCTCAAAAGAACAACAGAT	eStops	YDR324C	UTP4	0	-1.34924	-2.92968	-1.75291
AAAACACAGGCTTACATTGC	eStops	YPL128C	TBF1	0	-0.23987	-0.719405	-1.75246
GATACCAAATATCGTGTAAA	eStops	YNL182C	IPI3	0	-0.251913	-1.28168	-1.75215
TGCTCAAGCTATTAACGGTT	eStops	YKL180W	RPL17A	0	-1.29516	-2.18264	-1.75171
GAACCCAGTCACGTTCTCTT	eStops	YNL112W	DBP2	0	-0.559198	-1.08256	-1.75162
CCGGTCCATCCCCTAAACCA	eStops	YNL088W	TOP2	0	-0.246948	-2.05649	-1.74967
AGATCCCAACTTTGACATTT	eStops	YNL102W	POL1	0	-0.48992	-1.49238	-1.74799
GGGAACAAACACTCTTGAAG	eStops	YER147C	SCC4	0	-0.268693	-0.307411	-1.74771
TCCCTCCATGGAACGATTCG	eStops	YKR063C	LAS1	0	-0.4543	-2.26406	-1.74691
AGTCCGAAATATCCCTGGGC	eStops	YOR287C	RRP36	0	-0.44151	-2.04245	-1.74672
CAAGCTCCATGATGGCAGAT	eStops	YPR034W	ARP7	0	-0.760817	-1.64772	-1.74649
CAAACTCAAATAGCAGTGGA	eStops	YMR108W	ILV2	0	-0.517378	-1.1756	-1.74648
CCGGCCCATTCACCCCAACC	eStops	YML093W	UTP14	0	-1.66266	-2.28803	-1.74642
AGAACAATTGGATTTATTGT	eStops	YMR112C	MED11	0	-0.33437	-1.10481	-1.7463
GATGGCCAAAGAAGGAAGGT	eStops	YDR240C	SNU56	0	-0.376631	-1.09743	-1.74589
GCGGTCAAAAAGAAACTGTT	eStops	YJL050W	MTR4	0	-1.72782	-2.86568	-1.74521
GGCTCAAGCACAAGAAGACG	eStops	YJL033W	HCA4	0	-1.36911	-2.14582	-1.74506
GGTGGTCAAGAATATGACAC	eStops	YOR335C	ALA1	0	-1.27204	-2.29936	-1.7449
AATCCATGCACTTTCTTCAG	eStops	YKL144C	RPC25	0	-0.703331	-2.40997	-1.74461
TTCCAATGTATATTGTCTAA	eStops	YMR218C	TRS130	0	0.0171108	-1.57723	-1.74336
TTCCATGTAAGTATGTTCTG	eStops	YDR416W	SYF1	0	-0.34283	-1.37495	-1.74333
AATATCCCAGTCCTTACCGG	eStops	YKR086W	PRP16	0	-0.125249	-2.00993	-1.74293
ATTATTCAAGAGAACAAACT	eStops	YKL059C	MPE1	0	-2.21553	-2.96049	-1.74244
CTCATCAACAACGTATGTCT	eStops	YDR325W	YCG1	0	-1.31408	-2.71831	-1.74013
GACTCAGGATAACAAACGAA	eStops	YKL189W	HYM1	0	-1.22811	-2.01152	-1.73982
GAAAGTCCAAGTCCCGCCAA	eStops	YGL092W	NUP145	0	-0.15718	-0.984537	-1.73932
AGTGTTCCATATATCTTTCG	eStops	YNL088W	TOP2	0	0.0570565	-1.42377	-1.73918
ATAAACCAAGGTGAAGAACT	eStops	YKL078W	DHR2	0	-0.780815	-2.01143	-1.73882
TCCCACAAAGCCAACTGGGA	eStops	YER136W	GDI1	0	0.25342	-0.649052	-1.73769
TTACCCCAGCTTGGAAGCTT	eStops	YFR002W	NIC96	0	-2.66906	-3.33476	-1.73695
TCTCAAGGTAAATACACAAT	eStops	YML126C	ERG13	0	-0.0351463	-1.19032	-1.7348
CAAACACAACATGCCCTAAC	eStops	YKL186C	MTR2	0	-0.962109	-1.24525	-1.73474
GGCACCAAGTAAATCCAAAA	eStops	YOR340C	RPA43	0	-0.599161	-2.16236	-1.73474
GGCACAAAAGAAACTCAAGT	eStops	YDL153C	SAS10	0	-1.61191	-1.86262	-1.73379
TGATCAATCGAGCATCCCTT	eStops	YIL115C	NUP159	0	-0.626033	-2.03529	-1.73359
AAGATTCAATCAGGAGACAA	eStops	YIL083C	CAB2	0	0.0265572	-1.82218	-1.73356
TTGAACCATCTGGAGAATTC	eStops	YAL003W	EFB1	0	-0.654517	-2.09279	-1.73349
GCAAATCAAAGAGGTTGTGA	eStops	YHR074W	QNS1	0	0.248709	-1.98676	-1.73342
TGCTCAATATGACTTCCATA	eStops	YMR131C	RRB1	0	-0.577192	-2.68968	-1.73294
TTTCCATTCCAAAGTTATTA	eStops	YDR052C	DBF4	0	-2.16587	-2.66739	-1.73258
GCTTCAGGAACTTTATGAAT	eStops	YKL078W	DHR2	0	-0.7069	-0.8892	-1.73214
CGAACCAACGACGATCTGGT	eStops	YNR053C	NOG2	0	-1.26311	-2.07992	-1.73085
GCCTTACCAAGGAAATGTTA	eStops	YDR390C	UBA2	0	-0.290715	-0.61149	-1.73078
ACTTCAATCAGCCGCCACAA	eStops	YBR049C	REB1	0	-2.08773	-3.60349	-1.72949
ATTTCAGCCCTTGCCCCAAG	eStops	YNL290W	RFC3	0	-0.44671	-1.59676	-1.72848
GATCAGATTCCAGGCCGCGT	eStops	YNL262W	POL2	0	0.146245	-1.13482	-1.72831
AGGCCGTCAAATACATTATA	eStops	YKL033W	TTI1	0	-0.0955176	-1.94454	-1.72811
ATTCCAAGTTGAGTATTCTT	eStops	YGR253C	PUP2	0	-1.96451	-3.17196	-1.72743
TTACAGAGGAACTATTTGAT	eStops	YDR164C	SEC1	0	-0.326413	-1.79112	-1.72457
TTCGTTCGAAACTTTCCTCT	eStops	YHR186C	KOG1	0	-0.902917	-2.66621	-1.72433
AACCACAAAAATATGTGCCA	eStops	YBR155W	CNS1	0	-0.891677	-2.64693	-1.72269
ATTCCAGGGTTGATCTATCT	eStops	YBR152W	SPP381	0	0.0906444	-0.263576	-1.72127
ATCACAAGAACAAAGGCACA	eStops	YLR314C	CDC3	0	-0.981112	-3.16476	-1.72073
TTTACAGATTTGGTCTGATA	eStops	YLR117C	CLF1	0	-0.321644	-0.361869	-1.71959
CTATCCAAGTAGCTGACCAT	eStops	YHR165C	PRP8	0	-0.768468	-2.20341	-1.71942
AAAGCACAAGGTAGAACCAG	eStops	YOR341W	RPA190	0	-0.754749	-1.81277	-1.71925
TATATCCAAATTGAAATGGT	eStops	YGR090W	UTP22	0	-0.892689	-1.03003	-1.71916
ATTACAAAGGTTTGAATCCT	eStops	YCR093W	CDC39	0	-0.765763	-1.95855	-1.71873
GTGTTCAAGTCACCTTCCAC	eStops	YOR077W	RTS2	0	0.241684	-0.732005	-1.71717
TTTCTCAATATCATGCTCTT	eStops	YNL287W	SEC21	0	-1.99027	-3.01697	-1.71357
ATCCATAAAGTTAATCCCGA	eStops	YMR220W	ERG8	0	0.0249081	-1.92997	-1.71331
GAGACCCAAATAGCCATCGG	eStops	YBL004W	UTP20	0	-0.979619	-1.22516	-1.71275
TTGTCCAGTGGCAAGAATTG	eStops	YBR070C	ALG14	0	-1.04398	-3.41907	-1.71171
CAGTCGACTTAAAGGGAATG	eStops	YKL059C	MPE1	0	-1.65716	-2.15996	-1.71088
ACCATGCCATAATAGTAATT	eStops	YIL048W	NEO1	0	-1.41105	-2.0475	-1.71077
GACAAGCAAGACCATTATGG	eStops	YER136W	GDI1	0	0.0796593	-1.39	-1.71056
ACCTCAAGTTGCTAAAGGAA	eStops	YJL050W	MTR4	0	-0.899243	-1.9366	-1.71055
ATAGAACAAAACCCATCTCA	eStops	YDL195W	SEC31	0	-0.055478	-1.16755	-1.70972
TTGGTCAAGAAATTGGCGAA	eStops	YNL256W	FOL1	0	-0.216106	0.0942229	-1.70932
AGCGCCAATTAACGGAATTC	eStops	YJR112W	NNF1	0	-0.996429	-1.71347	-1.70854
ACACGCAAAGGCATTTCACA	eStops	YLR222C	UTP13	0	-1.21626	-2.56008	-1.70811
GCACCAGAGCGACACAGATT	eStops	YER147C	SCC4	0	-0.408901	-0.640589	-1.70757
TACCTCAGGGCCAGAAACAA	eStops	YIL062C	ARC15	0	-2.80145	-2.92099	-1.70546
GTTACAATGGATGGTTGACA	eStops	YGL245W	GUS1	0	-0.297734	-1.40607	-1.70514
AAACCGAGCCATTAGTGATT	eStops	YNL207W	RIO2	0	-0.486493	-2.15893	-1.7048
AACTTCCAGAGAATGATGCG	eStops	YMR093W	UTP15	0	-1.14843	-1.81276	-1.7046
ATACCAGATGATTCAAGCGA	eStops	YNL267W	PIK1	0	-0.220448	-1.11471	-1.70404
TGCTCAAGGTGACCCTACAA	eStops	YDL141W	BPL1	0	-0.472297	-0.770742	-1.70402
AAATCCCAATTGACCAATTC	eStops	YER008C	SEC3	0	-0.787272	-1.60569	-1.70346
CAGCCACAAGAAAGGTTGTT	eStops	YOR048C	RAT1	0	-0.768459	-1.3668	-1.70261
TGGAACCCAACCGTCTTCGA	eStops	YLR355C	ILV5	0	-0.826049	-1.11994	-1.7013
CTTGATCCAGGGATGATTCA	eStops	YPL153C	RAD53	0	-0.260477	-0.91464	-1.7001
AAGTTCAGGTTGGATTAGTA	eStops	YML064C	TEM1	0	-1.74069	-3.42226	-1.69828
AAGGTACAGCTTCTAGATTC	eStops	YMR168C	CEP3	0	-0.646245	-1.88152	-1.6982
CTCCATTGGATATATTCAGA	eStops	YLR249W	YEF3	0	-1.53125	-2.71931	-1.69716
CAACAGGAAAACAGCAAGAG	eStops	YNL151C	RPC31	0	-0.84778	-1.15559	-1.69687
CCAATCCAAGAATTGAAGTT	eStops	YGR185C	TYS1	0	-1.04238	-2.50535	-1.69668
AGGACAAGGAACATTTGGTG	eStops	YPR161C	SGV1	0	0.372833	-0.2332	-1.69458
AGGAGCAAAGATTTAGACAA	eStops	YHR107C	CDC12	0	-0.109908	-1.0753	-1.69416
CTATATCAAATTGACTACTT	eStops	YER012W	PRE1	0	-2.61616	-3.19517	-1.69359
CTCTCAAATTCCCACTATCC	eStops	YMR203W	TOM40	0	-0.558246	-0.916087	-1.68909
TCTCAGTATACCGGAGGATA	eStops	YIR006C	PAN1	0	-1.12593	-2.52754	-1.689
GATGATCGAGAGAGTTCAAA	eStops	YOL078W	AVO1	0	-0.328356	-1.558	-1.68788
GCCATCCAATGGACCCCAGA	eStops	YNL317W	PFS2	0	-1.294	-1.23876	-1.68778
TGAACAAATGCCTTACAATA	eStops	YJL019W	MPS3	0	-0.899514	-1.78991	-1.68753
AGATCAATTGTTCAGTTTAC	eStops	YGR095C	RRP46	0	-0.208882	-2.42685	-1.68686
TCCACAGGGTATGACCATTA	eStops	YHR072W	ERG7	0	-0.0739015	-2.75482	-1.68653
TTAGATCAACCAGATTCCCA	eStops	YGR245C	SDA1	0	-1.1853	-2.70812	-1.68561
GATCGAGAGGCCAATCATGA	eStops	YJL025W	RRN7	0	-0.468581	-2.22953	-1.68463
ACTCAGAAGAAGGAAGACAA	eStops	YFL038C	YPT1	0	-0.600522	-1.22722	-1.68437
TTCCATTCCAAAGTTATTAT	eStops	YDR052C	DBF4	0	-2.29231	-2.41919	-1.68436
TGCTACAAGACGCTACCAGA	eStops	YBL026W	LSM2	0	-0.281054	-0.854154	-1.68298
TTGTGTCCAATAATTCCTGT	eStops	YJL039C	NUP192	0	-1.56587	-1.92601	-1.68297
ATTCAAGGTGACTTCCAAGA	eStops	YKR081C	RPF2	0	-0.865325	-2.23	-1.68265
CCGCACAAGAACAGTGGCAA	eStops	YJL081C	ARP4	0	-0.892407	-1.73402	-1.68246
ACCCCATGGTTCCATATCAC	eStops	YNL181W	PBR1	0	-0.272083	-2.48804	-1.68218
TATAGCTCCAAAAGTATAAT	eStops	YKL165C	MCD4	0	-0.559121	-1.05103	-1.68175
CACACAGTTACCCCAATATT	eStops	YNR011C	PRP2	0	0.0929811	-1.00387	-1.68101
TCTCAGGTCATGTCACGTTC	eStops	YPL160W	CDC60	0	-0.508453	-1.15359	-1.68008
CTAATCTCCATAAGTAGTCT	eStops	YPR048W	TAH18	0	0.0934065	-0.670996	-1.67953
GTACCATTCTTTACATCTCA	eStops	YOR310C	NOP58	0	-0.988204	-1.97113	-1.67755
CGATCCATCTACCACCAGAA	eStops	YOR204W	DED1	0	-1.04548	-2.22213	-1.67658
AGTCAAGAATGCAAAGAGCA	eStops	YPL094C	SEC62	0	-0.0398559	-1.17492	-1.67599
TATCTTCCCAAGGTTTGAAA	eStops	YKL014C	URB1	0	-0.647003	-1.55586	-1.67476
CGATCAAAATGAGGGTGGTT	eStops	YHR188C	GPI16	0	-0.738716	-1.55621	-1.67456
GATCAGATCAAGGCGATGTT	eStops	YJL035C	TAD2	0	0.214052	-0.48509	-1.67444
GGATCAAATCACTTCCTTGA	eStops	YJR045C	SSC1	0	-0.153281	-0.512791	-1.67437
GCACATCGAATGCCCCAAGG	eStops	YDR472W	TRS31	0	-0.462208	-2.0773	-1.67354
ATATGCCCAACCTTTGTTAC	eStops	YDL031W	DBP10	0	-0.512187	-1.38791	-1.67282
ACCCTTCAAGTCAAGCTTTA	eStops	YOR151C	RPB2	0	-1.11993	-1.48875	-1.67273
TTCCAATCTCAAGGCAGACA	eStops	YPR019W	MCM4	0	-1.11	-1.49115	-1.67166
CTAATTCAATATGAACACAA	eStops	YNL232W	CSL4	0	-1.75589	-2.17708	-1.67143
CATATCAGATTAAAGTGTGT	eStops	YNL158W	PGA1	0	0.132208	-0.915161	-1.67114
TCGTCCAGTTATCCTTAATT	eStops	YMR270C	RRN9	0	-0.559834	-1.30736	-1.67021
ATTTCTCAAACTGGCGTCAA	eStops	YGR191W	HIP1	0	-3.20364	-4.02323	-1.66779
AAATATCAAAGTGTTGAAGA	eStops	YGR047C	TFC4	0	-0.389475	-0.380013	-1.66755
TTTCCAAGTGAACACTTCGC	eStops	YNL036W	NCE103	0	0.0303636	-1.44913	-1.6665
AAGGTTCAAGGTTCCGTCAT	eStops	YJR045C	SSC1	0	-0.629446	-2.70542	-1.66472
TCCGCAAGCCATGGGTATGA	eStops	YDR047W	HEM12	0	-0.195898	-1.06423	-1.66376
AAAGACCACTTAATCTCCTC	eStops	YML127W	RSC9	0	-1.39703	-2.16885	-1.66372
ATTCAACCTTCTGCTCAGAA	eStops	YER003C	PMI40	0	-0.615634	-1.57374	-1.66229
CTTACAGCAACTATTAACTC	eStops	YGL172W	NUP49	0	-0.0157021	-1.40498	-1.66177
TAATCCCACATCCAGCAAGC	eStops	YHR074W	QNS1	0	-0.714814	-1.30514	-1.66048
GCACCAAAATGGCACTTTAT	eStops	YHR196W	UTP9	0	-1.15102	-1.33305	-1.65989
TGTCCGAGGGGAGTCTATAA	eStops	YGR216C	GPI1	0	-1.28063	-1.79163	-1.65908
TCATATTCAACAGCATATTC	eStops	YDR118W	APC4	0	0.074224	-1.16037	-1.65908
AATTCCATAATTTACCGTCA	eStops	YHR165C	PRP8	0	-0.355485	-1.14851	-1.65677
ACACAGCAACCAATAGTAAC	eStops	YFR050C	PRE4	0	-1.28966	-1.76651	-1.6567
AAACCAAATGACAGATTCAT	eStops	YKL006C-A	SFT1	0	-1.6466	-1.09321	-1.65561
GTTCAAAAGGAAAGAAGTGA	eStops	YDL132W	CDC53	0	-0.352387	-0.541252	-1.65509
TTATTATCAAGCCAATATTA	eStops	YGR103W	NOP7	0	-0.968398	-2.00852	-1.65461
TCCTTCCACAACGTAACGTG	eStops	YER082C	UTP7	0	-1.21046	-1.85891	-1.65461
GAATTGAGCACGCTTGGCAC	Ctr2	NA	NA	0	-1.2056	-1.25502	-1.65348
ATAGATCAGGTTGACAAGAA	eStops	YIL091C	UTP25	0	-0.523567	-2.17018	-1.65337
GCATTCTCAAATTCTACCTA	eStops	YDR208W	MSS4	0	-0.510864	-1.89192	-1.65288
TTAACCCGATCATTAAAGGC	eStops	YKL006C-A	SFT1	0	-1.18397	-1.25101	-1.65254
ATTCCAAAAATTCCAAGAAG	eStops	YOL022C	TSR4	0	-0.756258	-1.70232	-1.65215
GTCCAATTGATGATTTCTGA	eStops	YDL235C	YPD1	0	-0.441643	-1.28343	-1.65174
CGTCAGTACGGCTCAATTAC	eStops	YBR236C	ABD1	0	-0.499327	-1.83165	-1.65126
GCCTCCCATCTTACAATCTG	eStops	YBR237W	PRP5	0	-0.68369	-1.76399	-1.64992
GGGCCAAGTGCAACATAAGT	eStops	YBR265W	TSC10	0	-0.313056	-1.79431	-1.64798
GTCAACAGCAAAATTCATTT	eStops	YMR047C	NUP116	0	0.175395	-0.647628	-1.64726
CAGCAACAAGGAACGGGGGA	eStops	YIL129C	TAO3	0	-0.458935	-0.528109	-1.64707
ACTTTCCAAGATACCTTCTC	eStops	YPL231W	FAS2	0	-1.66085	-2.75113	-1.64604
TGACCAAATTTGTAGATCAG	eStops	YLR117C	CLF1	0	0.0200146	-0.332127	-1.64505
TACCTACAGAGGGGAGACGA	eStops	YDL132W	CDC53	0	-0.62391	-2.15203	-1.64381
AGCAACCACTTAAGCCACAA	eStops	YHR196W	UTP9	0	-0.185366	-0.676069	-1.64274
GACTCAATGTCAAAGCCTAC	eStops	YPL082C	MOT1	0	-0.395587	-1.01563	-1.64263
CTTTCCAAAAGAATTTGTTG	eStops	YCR054C	CTR86	0	-0.131086	-1.63587	-1.64197
GAAACAAGGTAGATTACTGA	eStops	YNR053C	NOG2	0	-1.1906	-1.50737	-1.64164
GGCCCTCGAGTGGTGATTGT	eStops	YOR250C	CLP1	0	-1.42178	-2.56496	-1.64161
ATCTCATCAAGGTTTCTTGA	eStops	YGL040C	HEM2	0	0.108826	-0.401991	-1.64142
ATATCAAAACCTCCAAGAAT	eStops	YDR189W	SLY1	0	-1.82189	-1.68932	-1.64011
CTGATTCAACAGGTCCCACC	eStops	YDL132W	CDC53	0	-0.564936	-1.77391	-1.63952
ATTTCAGACAACTCCTGAAA	eStops	YLR272C	YCS4	0	-1.09954	-1.64275	-1.63787
AACGGTCAGCAAAACCAATT	eStops	YGL097W	SRM1	0	-1.72822	-2.13475	-1.63775
CGATCAATCCAGATTAAGGA	eStops	YGL018C	JAC1	0	0.193116	-0.210855	-1.6376
GCTATCCCAAAAGCAGCATC	eStops	YAL041W	CDC24	0	-1.59309	-1.42022	-1.63628
GCTTCTCAAGAGAGAACTAC	eStops	YJL014W	CCT3	0	-1.69754	-2.38794	-1.63574
CAAACAAAAGTACATCGGAC	eStops	YNL138W-A	YSF3	0	-0.668015	-1.64664	-1.63407
AAAGATCCACTCATTCGTAG	eStops	YDR141C	DOP1	0	-1.44737	-1.61952	-1.63383
ATCCAAATGTCCACATTCGT	eStops	YDR449C	UTP6	0	-0.999461	-1.87654	-1.63217
CGACCAAGTAGGGTCCGAAA	eStops	YJL039C	NUP192	0	-0.00348107	-1.41194	-1.63035
ATGGATCAAATATTCGTACG	eStops	YLR147C	SMD3	0	-0.580919	-1.32332	-1.63019
TGTCCCTCAAGAGATTACTT	eStops	YKL024C	URA6	0	0.222057	-0.798466	-1.62887
CGTTCCAGGGTGACAGGTTT	eStops	YPR176C	BET2	0	-0.357151	-1.09743	-1.62881
ATCACAAAACACTCCTATTG	eStops	YNL256W	FOL1	0	-0.208153	-0.567714	-1.62519
CTTCTCAACTCGCAAGAATT	eStops	YIR006C	PAN1	0	-0.727133	-1.24947	-1.62503
ATCGACCCAATCGGACAAAC	eStops	YGL008C	PMA1	0	-1.67483	-2.60776	-1.62468
CCAGAACAGAAAAACAACAT	eStops	YLR060W	FRS1	0	-1.11275	-1.89576	-1.62382
ATGCCAGCGATGTAGTCGAT	eStops	YPR048W	TAH18	0	-0.37314	-1.23709	-1.62295
GTCCATTCTACTCTAACATC	eStops	YMR076C	PDS5	0	-0.187388	-0.682654	-1.62271
CCACGAGTCCGAAATATCCC	eStops	YOR287C	RRP36	0	-1.10161	-2.39202	-1.6222
GCTAGACAAAACGACGTCAC	eStops	YGR175C	ERG1	0	-0.834882	-2.76003	-1.62165
TTCCCATTTCTGTAAATCCA	eStops	YDL064W	UBC9	0	-0.108766	-0.662095	-1.62104
TTCCAGAACACCTTATTGAT	eStops	YMR149W	SWP1	0	-0.476459	-1.50587	-1.62028
TCTTTATCAAGGTTGGTTAA	eStops	YIL048W	NEO1	0	-2.12731	-3.09172	-1.61897
TGTATACCATTGTGGCAGTT	eStops	YBR193C	MED8	0	-0.121299	-0.430516	-1.6186
AAAGGTCAAGCGAACATTGA	eStops	YGR128C	UTP8	0	-1.35929	-1.43909	-1.61845
TATGGCCAGAAAATGTAATT	eStops	YGR216C	GPI1	0	-0.909335	-1.16501	-1.61788
GCTTTGTCAAGAAGCGGGCT	eStops	YLR397C	AFG2	0	-0.386154	-1.20445	-1.61621
CGAACAACAAGAAACTGAGG	eStops	YOR329C	SCD5	0	-0.590105	-0.982195	-1.61572
GGTCAATCTGGCGTCTATGA	eStops	YDL153C	SAS10	0	-0.923915	-1.19306	-1.6157
GTGATCAATTTATAGAATTC	eStops	YDR166C	SEC5	0	-0.286403	-0.822498	-1.6156
TTACCACAGGAACTAATTCA	eStops	YOL102C	TPT1	0	-0.376935	-0.494198	-1.6151
CTCAAACCAATGCAGTGGGA	eStops	YDR390C	UBA2	0	-0.477459	-1.66854	-1.61496
AAATTGTCAGATGAGAGTCC	eStops	YPL085W	SEC16	0	-1.02931	-1.72407	-1.61475
AAGTCAGATGATAGTTCTGG	eStops	YNL240C	NAR1	0	-0.335552	-0.488926	-1.6146
CATTAACCATAGTCCGGAAG	eStops	YJL069C	UTP18	0	-1.30002	-2.36862	-1.61427
ATCATGCCGAGAAGAGAATG	eStops	YLR007W	NSE1	0	-0.197471	-0.61704	-1.61419
TTGTCAACGCATCAGGCCAC	eStops	YML127W	RSC9	0	-0.327264	-1.22074	-1.61397
GCCTCGACTGGACGAGATTG	eStops	YFL029C	CAK1	0	0.3485	-0.777632	-1.61393
AACACAGTTGAGTAAAGTAA	eStops	YOL144W	NOP8	0	-0.805498	-2.04943	-1.61345
ATTCAGAATAACAATCCCTA	eStops	YMR047C	NUP116	0	-1.20029	-0.96266	-1.61323
CATCCAAGTATATAATCATG	eStops	YLR459W	GAB1	0	-0.0127503	-1.51236	-1.61322
TGGAATCCAAGCGTTGTCGA	eStops	YLR249W	YEF3	0	-0.657099	-1.91869	-1.61201
GGACCAATGCAAACTAACCT	eStops	YOR224C	RPB8	0	-2.22916	-2.23124	-1.61047
TTCTCAATCCATTGAAAAAG	eStops	YJR016C	ILV3	0	-0.11694	-1.48686	-1.60974
CATCCAATTTACGCCCACAG	eStops	YNL258C	DSL1	0	-0.760587	-2.07881	-1.60947
GATCAGGAAGAAGAGCGTGA	eStops	YNL232W	CSL4	0	-2.5021	-2.23707	-1.60911
CCGTCAGTGCGAAGAATGCG	eStops	YOL066C	RIB2	0	-0.089971	-0.986984	-1.60891
GTACCAATTATTAACATGCG	eStops	YHR169W	DBP8	0	-0.573638	-2.11503	-1.60866
GCCCCAGGGTGATCCGGCGA	eStops	YBR234C	ARC40	0	-2.10268	-2.92299	-1.60847
CCCCAGCAAAATATATCCAA	eStops	YGL097W	SRM1	0	-0.69166	-1.33557	-1.60808
AAGACGACAAGCGAGTGATG	eStops	YKL089W	MIF2	0	-1.08202	-2.64741	-1.6076
GCAAGTTCAACAAGTCGTCA	eStops	YGL150C	INO80	0	0.209062	-0.51868	-1.60632
GCCTGGTCAACCTATCAATT	eStops	YKR071C	DRE2	0	-0.249683	-0.839632	-1.60588
TGTCCAAGATTTGGACTTGA	eStops	YCR012W	PGK1	0	-0.473969	-1.08863	-1.60499
TTCCAGTAGATGAACCACTT	eStops	YPL076W	GPI2	0	-0.853263	-1.9415	-1.60343
GCCGGCCAAGAAAAATTCGG	eStops	YLR293C	GSP1	0	-0.631153	-1.41512	-1.60087
TTTACAAATGGAAATGTTCT	eStops	YHR102W	KIC1	0	-0.63911	-0.873247	-1.60075
AAACTCCCAAAAATTGGCCA	eStops	YMR208W	ERG12	0	-0.803163	-0.930684	-1.60036
AACTTCCAATGGAACAATAG	eStops	YOR056C	NOB1	0	-1.03669	-1.13959	-1.60017
CGTACAGAACATATACGATA	eStops	YML064C	TEM1	0	-0.992736	-2.46231	-1.59921
ATTGTACAATTAGGCCCCAC	eStops	YNR011C	PRP2	0	-0.514126	-0.850426	-1.59655
CCTCGAGGTATACTTCTTCA	eStops	YLR397C	AFG2	0	-0.128959	-1.21428	-1.59556
TACACAGGTCAGGGAATCTT	eStops	YMR235C	RNA1	0	-0.43407	-2.25009	-1.59433
AAAAACCATTGGTACAAGAT	eStops	YBR136W	MEC1	0	0.261187	-0.59633	-1.59419
GTGTCTCGATTACAGTCTAA	eStops	YML127W	RSC9	0	-1.28528	-2.63553	-1.59411
AACCAAGTTTCAGGAGGGGC	eStops	YHR072W	ERG7	0	-0.335831	-0.445069	-1.59368
TTCATCCATTCGTCCACTTC	eStops	YBR193C	MED8	0	-0.599645	-1.39676	-1.59269
CCTCACAAGTAAGAAAATAC	eStops	YGR113W	DAM1	0	-1.06672	-1.59406	-1.5924
TAGCCAAAACGTGATAACTT	eStops	YBR136W	MEC1	0	-0.52657	-0.338563	-1.59179
TTTAATCCATATCTTATATT	eStops	YPL211W	NIP7	0	-0.919355	-0.878568	-1.59106
GATGTCCATTCTTGACCTAT	eStops	YML093W	UTP14	0	-0.706152	-1.0788	-1.59072
TAGATCAAGTAATTCTTACT	eStops	YMR113W	FOL3	0	0.17355	-0.190221	-1.59069
AGAACAGGCCAAGCCCCCAC	eStops	YDR398W	UTP5	0	-0.742196	-1.87143	-1.59
ATCCCATAATTCAGTATTTC	eStops	YDR416W	SYF1	0	-0.240461	-0.520676	-1.58981
ATACCAACCAAAGCTTGTTT	eStops	YDR301W	CFT1	0	-1.60003	-1.88723	-1.58908
CTCCAATATCTACCATAATC	eStops	YLR153C	ACS2	0	-0.565077	-1.53715	-1.58891
ATTACCAATGGGCTAAAGCA	eStops	YGL247W	BRR6	0	-0.895029	-2.20489	-1.58857
GCAAGACAAATTGGTTGGGA	eStops	YCR093W	CDC39	0	-0.663109	-1.78899	-1.58788
TTTCCATTCTTTGGTGTAGT	eStops	YGR264C	MES1	0	0.188038	-1.21358	-1.58728
ACTACAAGAATTGCGTAATG	eStops	YGR245C	SDA1	0	-1.1314	-2.62616	-1.58724
AGCCTCCCATCTTACAATCT	eStops	YBR237W	PRP5	0	-0.185876	-1.11186	-1.58706
TTCCAGGGTGCATGCCATTC	eStops	YPL151C	PRP46	0	-0.794287	-1.7054	-1.58688
AGCTTCAGGGTCAGTATGTG	eStops	YEL058W	PCM1	0	0.303714	-1.01059	-1.58658
AGCGGATCAGAGATCACGGT	eStops	YER104W	RTT105	0	-1.2343	-1.91562	-1.5857
TCATTCCATTGTGAAACCCA	eStops	YPR162C	ORC4	0	-1.28577	-2.45419	-1.58472
AGATCAAGAAGATGCCGGAG	eStops	YPR112C	MRD1	0	-1.24021	-1.33635	-1.58453
CCGAGCCAGAAGGCATCATC	eStops	YKL022C	CDC16	0	-0.863641	-1.79004	-1.5844
ATCGATCGAGAATTACAGCT	eStops	YDR301W	CFT1	0	-1.48241	-3.58809	-1.58258
TAATCAAAGAGACTCCCAGT	eStops	YDR356W	SPC110	0	-1.33933	-2.15126	-1.5819
CACGGGTCCAAGTATCAGCG	eStops	YDR044W	HEM13	0	-0.032798	-0.480193	-1.58136
GTTGATCGAATATTTAGTCT	eStops	YDR460W	TFB3	0	-0.561873	-1.92066	-1.58043
TGTCCAAACATTAAAAGGCG	eStops	YKR025W	RPC37	0	-1.05741	-1.72911	-1.57985
TAAACCAAATGGTATTCATT	eStops	YER093C	TSC11	0	-0.371656	-2.47454	-1.57752
AATTCACAGGATCTGATAGA	eStops	YBL034C	STU1	0	-0.414535	-1.28665	-1.57744
GCTGTCAAATCGAATTTGTG	eStops	YBR110W	ALG1	0	-1.42026	-1.81154	-1.5774
CATCTCAAAGAGTTTGTCTA	eStops	YGL048C	RPT6	0	-1.8828	-2.16307	-1.57666
TGTTCAAACTCAAATAGCAG	eStops	YMR108W	ILV2	0	-1.18955	-2.63309	-1.57633
GGTCAAGGTTCACAAGAACA	eStops	YKL182W	FAS1	0	-1.42099	-2.7374	-1.57325
CCTCCCAATCCGTCCTAGAA	eStops	YLR106C	MDN1	0	-0.535001	-2.10748	-1.57256
TAACCACCCTGCGTAATATA	eStops	YNL102W	POL1	0	-0.684892	-1.29457	-1.57213
GGGACGAACTATAAACGAGG	eStops	YKL012W	PRP40	0	0.224176	-0.870563	-1.57202
TCCCCAAGACATCCCAGTCT	eStops	YIL022W	TIM44	0	-0.839648	-1.51999	-1.57179
ATTCAAGGTCCAACTTCATC	eStops	YLR106C	MDN1	0	-0.365675	-0.728406	-1.57106
CATACCCAAGATATCATCGG	eStops	YOR207C	RET1	0	-1.67355	-1.79018	-1.57102
GGTATTCAACCTACTGTCGA	eStops	YMR203W	TOM40	0	-0.357606	-1.15216	-1.57069
ACTGTACGAAAGATTGTCCG	eStops	YGR216C	GPI1	0	-0.703785	-0.750012	-1.57042
ATACCAGGGAGTCTATAGCA	eStops	YML031W	NDC1	0	-1.2652	-2.60202	-1.56874
GACCATTGGGCAGTATATAC	eStops	YHR165C	PRP8	0	-0.18471	-0.742312	-1.56831
ACGACCAACTAGAAGAAATT	eStops	YPR176C	BET2	0	-0.425942	-2.21171	-1.56793
TCTCTTCGAGATAAGGCATG	eStops	YCL052C	PBN1	0	-0.367373	-0.710664	-1.56722
TATTACAATCCGCTTCCAAG	eStops	YJR068W	RFC2	0	-0.440333	-1.74211	-1.56717
AACTATCAGTATTTAACATC	eStops	YPL126W	NAN1	0	-0.171283	-1.55884	-1.56668
AATCAGCAGTACCGAGCGTT	eStops	YOL135C	MED7	0	-0.204059	-0.843243	-1.56667
ATCATCCCAATCGAATAAGT	eStops	YOR148C	SPP2	0	-0.10213	-1.59555	-1.5666
ACCCCAGATATGGTCCTGTG	eStops	YGR075C	PRP38	0	-0.073166	-1.85494	-1.56658
TCTGGCTCAAGATACTGATT	eStops	YML127W	RSC9	0	-0.130761	-1.10111	-1.56655
GTCCTCCAGGCCGTTGAACA	eStops	YNL207W	RIO2	0	-0.317672	-1.33078	-1.56612
TTTACAAGACATTATTTGCG	eStops	YOR151C	RPB2	0	-1.10718	-2.42868	-1.56571
AACTCAACCCCGTCGTGTTG	eStops	YKL078W	DHR2	0	-0.762674	-1.41768	-1.56539
ATTCCATTTCCATAGCGCCA	eStops	YBR243C	ALG7	0	-0.439488	-1.71983	-1.56449
TCAACAGGGTGTAACTGCAT	eStops	YOR361C	PRT1	0	-0.991619	-1.39872	-1.56384
CTTCAGCAAGTGCCGCAGAG	eStops	YPR104C	FHL1	0	-0.215472	-1.63006	-1.56339
TCGTTCCATTTACCATCTGG	eStops	YDR489W	SLD5	0	-0.820203	-2.6859	-1.56317
GATAGCCAACAGCCAAACCC	eStops	YFR004W	RPN11	0	-1.30549	-2.22564	-1.56259
TTTCCAGATCTTAATTATAA	eStops	YNL038W	GPI15	0	-0.208696	-0.714345	-1.56146
TGTTCAGTTAATCAAATGTT	eStops	YPL016W	SWI1	0	-0.814172	-1.5	-1.56119
TTATCAACGACTAAGACACA	eStops	YOR151C	RPB2	0	-3.01179	-4.43951	-1.561
GACTCAGTTTCATGAGACTG	eStops	YPR105C	COG4	0	-1.00478	-1.44533	-1.55835
AAGTTCCAAGCTTTAGATAC	eStops	YCR072C	RSA4	0	-0.380178	-1.8133	-1.55747
TTACTATCAAACAATCAAAA	eStops	YNL181W	PBR1	0	-0.821702	-1.3783	-1.55743
ATATCAAACCAATACGTTTG	eStops	YKL173W	SNU114	0	-0.426655	-1.90666	-1.5572
AATCCATGCCTTGAACGTAT	eStops	YMR076C	PDS5	0	-0.541828	-2.02858	-1.5569
AATACAAAACTTAAATGAAC	eStops	YJL074C	SMC3	0	-0.0778362	-0.880197	-1.55654
GCATCAAGTGCTTCAGCCGT	eStops	YFR028C	CDC14	0	-0.535542	-1.77635	-1.55636
ATGCACCCAGTCGCTTAAAG	eStops	YKL004W	AUR1	0	-1.08348	-1.88454	-1.55625
GCTCAAACTCTTGTGAATAG	eStops	YNL061W	NOP2	0	-0.410017	-0.673049	-1.55611
ATTTACAGAAACAATTCAGA	eStops	YPL209C	IPL1	0	-0.322098	-1.7612	-1.55334
ACTTCAGCAAGTGCCGCAGA	eStops	YPR104C	FHL1	0	-0.226315	-0.416048	-1.55327
TGTCAGGTATTGGGACCTCA	eStops	YPL126W	NAN1	0	-0.125951	-0.885389	-1.55313
CTCTCTTCGAGATAAGGCAT	eStops	YCL052C	PBN1	0	0.16664	-1.15978	-1.55301
ATGTCCCAAATCCTATCGGA	eStops	YDR060W	MAK21	0	-1.28949	-1.95008	-1.55216
AATATATCAATCTAGTGTAC	eStops	YHR165C	PRP8	0	-0.466765	-1.63583	-1.55158
GGTCAAATTTATCATTCCAT	eStops	YBR055C	PRP6	0	0.26058	-0.984473	-1.55142
ACCGCAACAATCTCAGAGGT	eStops	YDL164C	CDC9	0	-0.649009	-1.56707	-1.54972
ACTCTCCAGTGGTTAGCTTC	eStops	YMR076C	PDS5	0	-0.618057	-1.17978	-1.54827
AATCTCCAGGATCTGTTGAC	eStops	YKL152C	GPM1	0	-1.31151	-1.84536	-1.54815
ATCGCATCAGGTCCGCCACC	eStops	YJL050W	MTR4	0	-0.668005	-1.76585	-1.54805
CGAACAACAGCGGGATAACA	eStops	YLR106C	MDN1	0	-0.554984	-0.819818	-1.54798
CATTCAGACGAAGAAAATGA	eStops	YBR080C	SEC18	0	-1.40904	-3.80604	-1.54738
CTCGGACAACATCTCTGCCA	eStops	YLL035W	GRC3	0	0.0590895	-1.24968	-1.5467
CGTATTCCAGATGAGAATAT	eStops	YNL263C	YIF1	0	-1.2791	-2.08185	-1.54636
AAATCAACTACAACAAGAGT	eStops	YLR078C	BOS1	0	-0.778391	-1.99392	-1.54588
GGAACGATTAAGAGACACCT	eStops	YCR054C	CTR86	0	-0.183858	-0.496668	-1.54489
CGTTCTCGACATGAAGGTCT	eStops	YIL147C	SLN1	0	-0.669095	-1.03947	-1.54485
ACACCAAACAAGACGTCTCA	eStops	YKL195W	MIA40	0	-0.0641276	-0.907288	-1.5446
ATAACCAATATGGAGATCAA	eStops	YGR009C	SEC9	0	-1.5623	-2.9928	-1.54387
TTTCACAAAACGATGCTAAA	eStops	YGR185C	TYS1	0	-0.321012	-0.487826	-1.54309
TACTCCATGCCGTATTTCTG	eStops	YGR280C	PXR1	0	-0.517672	-0.9263	-1.54302
CAAAAATCAGGACTCTAATC	eStops	YEL002C	WBP1	0	-0.891397	-1.8061	-1.5417
GGGCCACAAGAAACTGAAGA	eStops	YBR079C	RPG1	0	-1.35146	-2.17939	-1.54116
TGAACAAGGTAAGATCATTG	eStops	YPR010C	RPA135	0	0.210023	-1.5149	-1.54062
GAAGCTTCAGGGTCAGTATG	eStops	YEL058W	PCM1	0	-0.581824	-1.43984	-1.54022
CGTACAGGTGATGGATTTCC	eStops	YMR281W	GPI12	0	-1.25558	-1.89258	-1.53978
TACCAGACCATGGAATACAT	eStops	YNR016C	ACC1	0	-1.23684	-2.24922	-1.53937
AATCAGGTTGAAGTTCAGGT	eStops	YML064C	TEM1	0	-1.89366	-2.29509	-1.53827
ATCTCAACTATTGAAATTTG	eStops	YLR274W	MCM5	0	-1.1853	-2.17243	-1.53823
GTTACAAATTGACGAATTAC	eStops	YGR090W	UTP22	0	-0.895334	-1.43795	-1.53664
ATTGTCCAAGTATGATATAG	eStops	YPL007C	TFC8	0	-0.021591	-0.858612	-1.53657
AGTCCAGACCAACAACAAAG	eStops	YGL008C	PMA1	0	-1.72118	-3.01132	-1.53645
GCTACAAGACGCTACCAGAA	eStops	YBL026W	LSM2	0	-0.58728	-1.05589	-1.53631
GATTTCCCATTCAAAATGCA	eStops	YDL045C	FAD1	0	-0.0759701	-0.88063	-1.53523
CTTGCTCAGGATTTGATTCG	eStops	YLR197W	NOP56	0	-1.44721	-2.08457	-1.53464
GATCAAATACGGCGAGAAAG	eStops	YGL075C	MPS2	0	-0.363868	-1.31365	-1.53464
ACTGCAAGAACAGAAGCTGT	eStops	YHR024C	MAS2	0	-0.495476	-1.84819	-1.53408
GGTCTCCATGGTAGTACTTC	eStops	YIL150C	MCM10	0	-0.85918	-2.2406	-1.53392
ACCTGCTCAAGTTATTCTTG	eStops	YLL018C	DPS1	0	-0.818081	-1.73369	-1.53386
CTCTCAACAATTCCAAGACG	eStops	YNL132W	KRE33	0	-0.712465	-1.47644	-1.53371
AACACAATCGTATACTAAGA	eStops	YOR254C	SEC63	0	-0.656862	-2.17588	-1.5337
CTTGCCAATTTCTTAAGGAT	eStops	YBR247C	ENP1	0	-1.54132	-2.61172	-1.53337
GAACCAATTTCGTATCATTG	eStops	YKL021C	MAK11	0	-0.16298	-0.666907	-1.53336
TAATCAAATTGATGAAATAT	eStops	YDR376W	ARH1	0	0.179877	-0.333829	-1.5331
AATCCCAAACCCACCTTTGG	eStops	YNL006W	LST8	0	-1.1142	-1.65512	-1.53294
ATGACCAGACCATAAGAATC	eStops	YDL145C	COP1	0	-0.930069	-2.65602	-1.53251
TGCCCAGTGTGCTAGAGGAA	eStops	YIL147C	SLN1	0	-0.80973	-1.69987	-1.53209
TCTCAAAGGTTGCAAACCGA	eStops	YGL201C	MCM6	0	-1.06871	-1.74546	-1.53198
CCACTCAGTTTAGTTCTCAA	eStops	YGL201C	MCM6	0	-2.28959	-3.35818	-1.52919
GTTATCAAGGCGTCCGGAGG	eStops	YPL020C	ULP1	0	-0.305054	-1.37954	-1.52857
TAGACCAATAGTCATTGAAA	eStops	YDR141C	DOP1	0	-1.09442	-1.74995	-1.52841
GACACCAAACCTCTGCACAT	eStops	YIL143C	SSL2	0	-1.41903	-2.56071	-1.5279
ATGACCCCACCATAATTGTC	eStops	YGR094W	VAS1	0	-0.74756	-2.57116	-1.5277
ATTCGTTCGAAACTTTCCTC	eStops	YHR186C	KOG1	0	-1.06721	-1.99912	-1.52716
ATTTCAAGGCATTAGGTTAT	eStops	YHR197W	RIX1	0	-0.536977	-1.59823	-1.52428
GAACAACAGAAGATCGACAT	eStops	YJL008C	CCT8	0	-1.44306	-3.61897	-1.52414
CTCTCAACCAAGCCTATATA	eStops	YIL150C	MCM10	0	-1.57921	-3.15901	-1.52383
AATCAAAGAAAAGGTAGAGC	eStops	YER013W	PRP22	0	-0.488358	-1.35704	-1.52299
AGTTCCAACCTCCAAAGATT	eStops	YJL002C	OST1	0	-0.868269	-1.88449	-1.52246
TATCCAAACACAATTGGCAT	eStops	YLR129W	DIP2	0	-0.462421	-1.82732	-1.52172
GAATGATCCAGTCCACAGCA	eStops	YMR290C	HAS1	0	-0.808184	-1.88984	-1.52082
ACAACTTCAAGAACAGGATC	eStops	YPL153C	RAD53	0	-0.146714	-0.0521372	-1.51988
GTCCATTCAGGTAAATTTAC	eStops	YBR142W	MAK5	0	-0.179478	-0.243562	-1.51893
TCTACAGCAGTTGGACATGG	eStops	YIL129C	TAO3	0	-0.614317	-1.55163	-1.51817
GTTCCAAGTGGAATACGCCT	eStops	YMR314W	PRE5	0	-2.03906	-3.50784	-1.51724
ACGCCAGTAACGCTGCTCCG	eStops	YMR093W	UTP15	0	-0.768145	-1.55213	-1.51699
ATTTCAGACTGTCTTGAAAA	eStops	YHR107C	CDC12	0	-1.31369	-1.4347	-1.51691
CGTAATCAAAACAACACATC	eStops	YNL132W	KRE33	0	-1.5288	-2.0672	-1.51681
ACCTCAAGTGATGGGTACGT	eStops	YMR236W	TAF9	0	-0.477794	-1.14683	-1.51643
TAATCCAGCTTTGTAAAGAC	eStops	YER147C	SCC4	0	-0.34213	-1.09383	-1.51566
AAACACAGTTGAGTAAAGTA	eStops	YOL144W	NOP8	0	-0.273584	-1.57783	-1.51537
CCATTGTCAGTTGAATATTA	eStops	YGR216C	GPI1	0	0.00598231	-1.49421	-1.5136
CATCCAATACCTTGGATCTC	eStops	YKL012W	PRP40	0	0.085087	-1.06427	-1.51299
ATAAACCAGTGAACATTCTG	eStops	YNL158W	PGA1	0	-0.406332	-1.62317	-1.51283
TTGTCCAAGAAATTCCCAAA	eStops	YBR236C	ABD1	0	-0.272307	-1.36158	-1.51242
CTGAGTCAAGCTCTTGGCCC	eStops	YMR288W	HSH155	0	-0.272592	-1.35727	-1.51209
AATCCTCCCAAGTCGACCAT	eStops	YDR182W	CDC1	0	-0.56173	-1.88485	-1.51125
AAACCCACTCCCCATTGAGA	eStops	YDL120W	YFH1	0	0.242075	-0.308295	-1.51033
ATTGATCAATTGGTAACTAT	eStops	YFL017C	GNA1	0	-0.366533	-0.909354	-1.50951
AAGGGTCAAACCTATAAAGG	eStops	YJL050W	MTR4	0	-0.576868	-1.89391	-1.5087
TGTCCAAGTATGATATAGTG	eStops	YPL007C	TFC8	0	-0.555296	-1.41046	-1.50807
TTTCAAGTCAATTCCATTGG	eStops	YLR166C	SEC10	0	-0.397317	-2.16574	-1.50773
AGTACAGAGCTACCGACTAA	eStops	YKR063C	LAS1	0	0.00789209	-1.30252	-1.50654
ACCGACAATACCCACTAAAA	eStops	YJL025W	RRN7	0	0.211483	-0.758157	-1.5064
ATAATCAAAACAATTCCTCG	eStops	YLL031C	GPI13	0	-0.627031	-2.49918	-1.50586
CATCCAATCTTTATCATCAG	eStops	YPL175W	SPT14	0	-0.471435	-1.5757	-1.50522
TTCCAAGTCGGTCCATGTAC	eStops	YPR035W	GLN1	0	-0.553363	-1.61811	-1.50364
AATATACAGAATATATACTT	eStops	YDR531W	CAB1	0	-0.350319	-1.04039	-1.50339
TATACAGGAGAAAGAAGAGT	eStops	YNL110C	NOP15	0	-1.49141	-2.46653	-1.50284
CCAGGCAGAGTGAATTAAGG	eStops	YMR213W	CEF1	0	-0.874776	-1.62369	-1.50255
TAGTTCCAAACGTTTCCAGA	eStops	YHR165C	PRP8	0	-0.223047	-1.22467	-1.50168
TAGTTTCCAATTATCAGATC	eStops	YJR057W	CDC8	0	-0.290083	-1.70036	-1.50167
ATTACAGGAAATCCCAGAAC	eStops	YLR274W	MCM5	0	-1.79079	-2.26629	-1.49992
CGAACAAGCAAAAAACGTAG	eStops	YPL266W	DIM1	0	-0.124475	-1.08191	-1.49985
TCAACAAACTACAATTGATT	eStops	YHR165C	PRP8	0	-0.925879	-1.63748	-1.49904
GTTAGATCAACCAGATTCCC	eStops	YGR245C	SDA1	0	-0.171827	-0.304504	-1.49707
ACTACAGCTGTCCAGAGTGA	eStops	YNL038W	GPI15	0	-0.44963	-0.597797	-1.49594
AATATTCAAAAATTGGATGC	eStops	YER013W	PRP22	0	-0.231191	-0.567957	-1.49548
CACCCTCCACGATTGCTCAT	eStops	YMR296C	LCB1	0	-1.75444	-2.15105	-1.49477
GCACAAGCACAATCAGGTAC	eStops	YDR021W	FAL1	0	-0.616169	-0.35313	-1.49465
AATCAGCTGTGGGATATATC	eStops	YAL001C	TFC3	0	-0.426068	-1.5619	-1.49438
GATCAGGAGGCCACAACTAC	eStops	YKR086W	PRP16	0	-0.178735	-1.16057	-1.49403
TAATAGTCAAGGCTGTTTAA	eStops	YPL126W	NAN1	0	-0.912663	-1.59221	-1.49356
ATCCCATGTAATTGTGCGGG	eStops	YLL035W	GRC3	0	-1.11207	-1.8057	-1.49345
GCTCAATTACAAATCGCTAT	eStops	YNR016C	ACC1	0	-0.0555112	-1.4976	-1.49231
TACTCAAGACTACACTTTGC	eStops	YGL093W	SPC105	0	0.136304	-0.0345253	-1.49172
CAATCCATTTGGGAATTTCT	eStops	YBR236C	ABD1	0	-0.726364	-1.95291	-1.49117
CATACCCAGGATAAGAAGCA	eStops	YJL050W	MTR4	0	-1.12202	-2.23571	-1.49088
CTTTCAAAAGTTAACAAATG	eStops	YAL001C	TFC3	0	-0.332103	-1.11272	-1.49065
TTACCTCAGTTAAAGGTACT	eStops	YJL005W	CYR1	0	-1.69776	-2.57346	-1.49051
TTCCATACACGAACTTGTAA	eStops	YKR002W	PAP1	0	-0.196261	-1.34045	-1.4903
TTCAATCCATCTCACAGGAG	eStops	YPL231W	FAS2	0	-1.82523	-4.17205	-1.48922
CATTCCAGTTGATATACGCT	eStops	YJL061W	NUP82	0	-0.918655	-1.50971	-1.48879
CGATCAAGAACAACCCAAAG	eStops	YPR133C	SPN1	0	-1.36448	-1.98887	-1.48678
TACGTCAGGACGTTAACCTA	eStops	YHR165C	PRP8	0	-0.993833	-2.23951	-1.48438
ATCAACCAAGTAGATTGAGA	eStops	YDR407C	TRS120	0	0.260464	-1.08713	-1.48373
TGTCCAATTACGCGCACGTT	eStops	YER018C	SPC25	0	-1.21734	-1.64895	-1.4835
AGGAACAGGCGTTCCATAAT	eStops	YHR188C	GPI16	0	-1.16293	-0.810909	-1.48322
TATAAACAAATGCTAAAAGA	eStops	YOR176W	HEM15	0	-0.588245	-1.20928	-1.48278
CTTCCAACAACTGGCCTCCA	eStops	YLR026C	SED5	0	-2.13378	-2.49301	-1.48265
ACCCCAACATGCTACATCAG	eStops	YGL245W	GUS1	0	-0.781073	-1.93609	-1.48213
CAATCAAATTATACCGACAC	eStops	YGR140W	CBF2	0	-2.06422	-2.08593	-1.4807
ATTCAATCTTTATCCGTGCC	eStops	YLL035W	GRC3	0	-0.508665	-0.83761	-1.47982
TGAACCATTTCATCTCACCA	eStops	YJL061W	NUP82	0	-0.580323	-0.510474	-1.47873
GAGGTACGAACACTTTCTGG	eStops	YOR329C	SCD5	0	-1.02325	-1.91581	-1.47828
TCGTACCATTCTATAATTTG	eStops	YMR240C	CUS1	0	-0.149059	-0.498649	-1.47513
CAACTATCAACAATCTTATC	eStops	YPL085W	SEC16	0	-0.856334	-2.26951	-1.47446
CCAATTCCAATCATCATCTT	eStops	YNL258C	DSL1	0	-0.735037	-1.77287	-1.47393
GCAAACAGTTGTTACAAGGT	eStops	YJR089W	BIR1	0	0.131865	-0.81846	-1.47101
GTTACTCAGCAACAACTAAT	eStops	YOR272W	YTM1	0	-0.782205	-1.73206	-1.46928
TAGTCAATTGCAAGGTGCAA	eStops	YER009W	NTF2	0	-1.28389	-2.93817	-1.46852
GGCTCAAGACCCACAAACTA	eStops	YLR272C	YCS4	0	-1.04593	-1.92731	-1.46813
TTGAACCATTCCACATCTTC	eStops	YDL060W	TSR1	0	-1.02668	-1.84621	-1.46726
GGTCAAACATATAGAATAGT	eStops	YBL084C	CDC27	0	-1.01888	-2.41074	-1.46649
AGAACAAAAACGAGTTAGGA	eStops	YDR141C	DOP1	0	-0.300374	-1.53076	-1.46614
GACGCTCAAGCTCCCACTAC	eStops	YJL041W	NSP1	0	-0.694202	-1.74412	-1.46559
ACGCTCAATTGCTAGAGAGC	eStops	YFR002W	NIC96	0	-2.52143	-2.21903	-1.46467
GATTACAATCTCAGTTAACC	eStops	YIR006C	PAN1	0	-1.58476	-2.53392	-1.46343
ACATTGTCCAATCGAACAAG	eStops	YPL204W	HRR25	0	0.163404	-1.50242	-1.46267
ACATTCAATTAAAACCGGGT	eStops	YNL007C	SIS1	0	0.154405	-0.0239003	-1.46258
GTTCAAAGAGATGCTTCGAA	eStops	YDR299W	BFR2	0	-0.515523	-1.42133	-1.46257
GCGGGCCATATAAAATTGTT	eStops	YOR174W	MED4	0	0.111703	-0.70608	-1.462
TTACTCCATGCCGTATTTCT	eStops	YGR280C	PXR1	0	-0.229439	-0.901831	-1.46183
TATACCATAAAATATGAGAG	eStops	YBR136W	MEC1	0	-0.247493	-1.89726	-1.46094
CTTTCAGTTGGTAAATTACT	eStops	YGR216C	GPI1	0	-0.645104	-1.17262	-1.46091
TGATCAAGTTATTAGGTTGG	eStops	YJR072C	NPA3	0	-0.739653	-3.23399	-1.46088
GTTCAGCAACCGGAGGTTCT	eStops	YKL210W	UBA1	0	-0.473013	-0.479884	-1.46065
TCTTACAGAATCCGGCAAAC	eStops	YLR430W	SEN1	0	-0.375001	-0.954602	-1.45984
CCAGGAGCAACTACAAGTGT	eStops	YOR075W	UFE1	0	-0.351613	-1.18106	-1.45893
TGGGAACAAACACTCTTGAA	eStops	YER147C	SCC4	0	-0.687047	-0.841542	-1.45829
GTCCTCCCATTGGTGTTGAT	eStops	YJL019W	MPS3	0	-1.80131	-2.02328	-1.45777
CTTTCCCAAAAAGATCCAAT	eStops	YOR336W	KRE5	0	-0.219174	-0.572918	-1.45628
TGTTCCCAAGGTAAGCCAGA	eStops	YOL123W	HRP1	0	-2.48221	-2.16024	-1.45622
GTACATTCAGTCGCACGACT	eStops	YCL043C	PDI1	0	-0.498136	-1.15475	-1.45587
AATGTCCAAGCAATCGATTT	eStops	YBR080C	SEC18	0	-0.902685	-2.24225	-1.45487
AGCTCTCCAGCGACGTATCA	eStops	YHR186C	KOG1	0	-1.57543	-1.72303	-1.45474
CCACAGAACTGGGTCAAACA	eStops	YJL054W	TIM54	0	-0.476213	-0.140005	-1.45434
TTACTCAGGAATTAGTAAAA	eStops	YKR004C	ECM9	0	-0.39727	-0.547216	-1.45308
CGAACCAAAATCTTACTGAT	eStops	YPR112C	MRD1	0	-1.03517	-2.44142	-1.45141
ATTACCAGCCGATTACCGAT	eStops	YHR186C	KOG1	0	-1.12467	-2.70604	-1.45134
CTCTCAATTGTTAACTTTAA	eStops	YDL126C	CDC48	0	-0.777663	-1.92943	-1.45088
TTGATACAAATGTGTTACCA	eStops	YJL010C	NOP9	0	-0.530088	-1.41278	-1.4502
AGTTCAAGTTAGGTCGGTGA	eStops	YOL021C	DIS3	0	-0.609171	-0.857324	-1.44994
ATGCACCAAATAGAACCACC	eStops	YLR115W	CFT2	0	-1.25294	-1.90065	-1.44858
TTCCATATCCAATAGACTTT	eStops	YJL031C	BET4	0	-0.360119	-0.947653	-1.44798
ACCACAGGGAGAAATAACGT	eStops	YKL045W	PRI2	0	-1.91988	-3.83739	-1.44737
TGAACCACCTCGAACAAAAA	eStops	YDL030W	PRP9	0	-0.293584	-1.32326	-1.44734
CATTTCTCAAACTGGCGTCA	eStops	YGR191W	HIP1	0	-1.06001	-1.65718	-1.44427
AGAATTCAACTACCAGTATT	eStops	YMR128W	ECM16	0	-0.391788	-1.26591	-1.44158
GATCGAGAATTACAGCTAGG	eStops	YDR301W	CFT1	0	-1.33459	-2.11125	-1.44158
TTCTACAGTTATTGAAGCAG	eStops	YOR077W	RTS2	0	-0.144779	-1.0944	-1.44116
CTACCAAAGATTACGTCATA	eStops	YPR010C	RPA135	0	-0.186827	-1.38977	-1.44115
ATGTACGACCTTGGGAATTC	eStops	YGR179C	OKP1	0	-0.720125	-2.13494	-1.44033
TTTCAGGACATAATATCTGA	eStops	YKL033W	TTI1	0	-0.29728	-2.04915	-1.43955
CTTCACAAGAACAGTCGATT	eStops	YDR464W	SPP41	0	-0.687857	-2.13722	-1.4393
CTACCCAACGAAATGTATCA	eStops	YOR116C	RPO31	0	-1.64971	-1.31917	-1.43883
GGGCCACATACGTTTGTACA	eStops	YDL060W	TSR1	0	-0.438233	-0.618045	-1.43848
AGTTTCCATTGAGATAATGT	eStops	YNR043W	MVD1	0	-1.46262	-2.92363	-1.4382
TTTATCTCAGTATAAGATCA	eStops	YGR128C	UTP8	0	-0.508064	-0.855239	-1.43732
CTGCGAGGCAGAGTATATCT	eStops	YFR028C	CDC14	0	-0.459666	-0.204758	-1.43668
CTGGTTCAGAAGAAAGACAC	eStops	YNL161W	CBK1	0	-2.34364	-2.68904	-1.43612
GTTACAAAAGCATCCAGAAG	eStops	YPL082C	MOT1	0	-0.532548	-1.59262	-1.43611
CGTACAAGGCGTCAATCTAG	eStops	YNL163C	RIA1	0	-0.126252	-0.295944	-1.43578
AGAGACTCAGCAATATGAAT	eStops	YER172C	BRR2	0	-0.300352	-0.556388	-1.43551
CATACAAATACCAGGCTACG	eStops	YOL066C	RIB2	0	-0.204026	-0.604341	-1.43542
GACATCCATATTGGCTTCTC	eStops	YBR236C	ABD1	0	-0.842573	-0.751591	-1.4347
GTGGTACAAGTTTCCAAAGC	eStops	YDR280W	RRP45	0	-0.4487	-1.16549	-1.43354
ATATTCAAATGCTTTCTATC	eStops	YDR160W	SSY1	0	-0.253302	-0.270258	-1.43319
GATTGATCAAGTTATTAGGT	eStops	YJR072C	NPA3	0	-0.41078	-1.71238	-1.43233
GCCCATTGAATAGGGACGGC	eStops	YGL065C	ALG2	0	-0.805926	-1.16153	-1.43215
TTCTGTCAAAGATACATGAC	eStops	YPR107C	YTH1	0	-0.789946	-0.843775	-1.4319
GATTATCAACCTATTTCACG	eStops	YJL069C	UTP18	0	-0.391142	-1.07806	-1.43048
TATGATCAATCTGATGATGG	eStops	YGL155W	CDC43	0	-0.0524069	-0.84825	-1.43044
TAACCAAAAGCAAGAACCTG	eStops	YIL078W	THS1	0	-0.702035	-2.03076	-1.42907
TTATCAAGAGGCTAATCCAC	eStops	YJL025W	RRN7	0	-0.457619	-1.66903	-1.42806
GTTCTCAAGTCGTTTCAATG	eStops	YEL019C	MMS21	0	-0.407876	-1.17775	-1.42751
AAAAATCAAGATATACCCGA	eStops	YPL122C	TFB2	0	-0.988884	-2.05653	-1.42699
ATATTCAAGCTCAAACAATG	eStops	YDR468C	TLG1	0	-1.25	-2.58105	-1.42695
TCAACAAATAACTGCAGAAA	eStops	YLR103C	CDC45	0	-0.64848	-2.11982	-1.42667
CGACCAAAGATCCGGAAGAG	eStops	YKR086W	PRP16	0	0.339864	-0.656454	-1.42544
CAATTGTCAGCGCCAATTAA	eStops	YJR112W	NNF1	0	-1.16712	-2.10854	-1.42426
AAATGACCAAGGAGATGGCT	eStops	YGR002C	SWC4	0	-0.483896	-0.561017	-1.42372
TTCCCAAGCAGCCAAGGGCA	eStops	YPL082C	MOT1	0	-0.188721	-0.742953	-1.4233
GTCACAATCTACTGCATCAC	eStops	YBR193C	MED8	0	-0.981002	-1.78009	-1.4221
CCACACAGGAAAATATCTCT	eStops	YOL069W	NUF2	0	-0.988086	-0.761728	-1.42061
GTATCAAGTTACATGTGAAA	eStops	YNL102W	POL1	0	-0.384849	-1.60441	-1.4194
GCTACAAGAAGGCCATGATA	eStops	YPR178W	PRP4	0	0.145646	-1.26939	-1.41937
TGGCCCAGTTGAGGCAAACG	eStops	YPL233W	NSL1	0	-2.26324	-3.3681	-1.41814
ACAACAACCAGAACAACCAC	eStops	YOR259C	RPT4	0	-0.809611	-1.93226	-1.41739
AAAACAACAAAAGGTTAACG	eStops	YJL074C	SMC3	0	-0.166911	-0.860696	-1.41731
TTCCCAAAGGTAAGGATTAA	eStops	YBL084C	CDC27	0	-1.2141	-2.43388	-1.4169
GCTCAACCAAATGCTTTGTC	eStops	YGL247W	BRR6	0	-0.520048	-1.66368	-1.41658
GTCTTCGAAAAGTCAAAGTT	eStops	YKL078W	DHR2	0	-0.370332	-1.20794	-1.41616
TGCGACCAGTTCGTTATGTT	eStops	YKR068C	BET3	0	-0.0918868	-0.863194	-1.41582
ACCATCCCGAGTGGTGTATC	eStops	YGL044C	RNA15	0	-1.16328	-1.5076	-1.41544
CATCCCACACAGGGTGATTA	eStops	YBR198C	TAF5	0	-1.81778	-2.53277	-1.41512
CCTTCCCACGCGCCGGCACA	eStops	YNL262W	POL2	0	-0.495836	-1.39426	-1.41432
GGACCAATTATTAGAAGCAC	eStops	YDL031W	DBP10	0	-0.5239	-1.22038	-1.41415
GTCTGTCCAAGATACTAAAG	eStops	YOR174W	MED4	0	-0.368402	-1.22344	-1.41402
TTCACAATGGAATGAAACGT	eStops	YPR162C	ORC4	0	-0.714251	-1.6025	-1.41395
GCACAATTTGCCGTTCCCCA	eStops	YGR172C	YIP1	0	-1.04384	-2.16176	-1.41322
CAATCAAGAAGCTAAGCCAG	eStops	YDR510W	SMT3	0	-0.201585	-1.73308	-1.41314
TCCGTACCAATGCATCATCT	eStops	YDL205C	HEM3	0	0.0574457	-0.419188	-1.41312
TCCGCTCAAGAATATTTAGC	eStops	YEL032W	MCM3	0	-1.989	-2.2982	-1.41254
AACACAATCGAGATTTGCAG	eStops	YHR186C	KOG1	0	-0.0593755	-1.07629	-1.41144
TGAACAGGAGGCCCATAACA	eStops	YOR259C	RPT4	0	-1.08689	-1.40117	-1.41097
CGAACGAGACAGTTCTTTGT	eStops	YGR047C	TFC4	0	-0.133533	-0.331828	-1.41061
TTACCCATGTAGAAGAGGAA	eStops	YML049C	RSE1	0	0.448228	-1.76799	-1.41056
TTTGCCAAAACGCAGGAACG	eStops	YBR136W	MEC1	0	0.434187	-0.559823	-1.41044
ACTCAGCTCGTATCAAGGGG	eStops	YDL140C	RPO21	0	-1.47953	-3.57975	-1.40882
CCCAATTATCACAATCTGAG	Ctr2	NA	NA	0	-0.613587	-0.760899	-1.40803
TGTACGAAAGATTGTCCGAG	eStops	YGR216C	GPI1	0	0.593527	-0.498913	-1.40712
TATGTTTCAAGAGACTGGGC	eStops	YKL052C	ASK1	0	-0.733966	-1.9257	-1.40629
TGATCAACATGATATTACCG	eStops	YPL085W	SEC16	0	-0.761282	-2.26566	-1.40629
GAAACCCCAACCATCAATTG	eStops	YNL163C	RIA1	0	-0.573225	-1.08455	-1.40599
ACTCAAATCATGTATAACAA	eStops	YNR016C	ACC1	0	-0.384441	-0.817039	-1.40522
ACCAATCAGAATTCCTCTAC	eStops	YJL041W	NSP1	0	-1.0954	-2.03322	-1.40442
AATAGCCAGAACTTAAGTCA	eStops	YPR019W	MCM4	0	-0.980731	-2.65203	-1.40336
AAGTGATCAGAAGGTTCCAT	eStops	YPL085W	SEC16	0	-0.0371183	-0.710599	-1.40304
TTATCAAAAAGGTAACAAAC	eStops	YFL008W	SMC1	0	0.145746	-0.960288	-1.4028
TGGAACAGCCTGATGGTACT	eStops	YAR007C	RFA1	0	-0.62755	-1.25787	-1.40223
TTATACCAAGAAATAATGAG	eStops	YIL068C	SEC6	0	-0.692512	-2.49199	-1.39913
ATACTCCGATCTAGTTTACT	eStops	YNL188W	KAR1	0	-1.05404	-1.387	-1.39716
ATCTCAATACGTACAAGAAA	eStops	YPL231W	FAS2	0	-0.653752	-2.14796	-1.39596
CTTTCCAACACATATTTAGG	eStops	YIL091C	UTP25	0	-0.31358	-0.837139	-1.39476
TCCCTCCAATCGAAGAATCT	eStops	YPL016W	SWI1	0	-0.674115	-1.42116	-1.39421
TTGGGTCAAACGATGTCGAT	eStops	YOR116C	RPO31	0	-0.704046	-2.02535	-1.39407
CGTTCCATTTACCATCTGGT	eStops	YDR489W	SLD5	0	-1.5817	-1.81322	-1.39369
AGTCAGGGAAAGAAATATGA	eStops	YOR281C	PLP2	0	-0.672168	-1.75795	-1.39334
GCCCAATATAGCCAAGATAA	eStops	YLR105C	SEN2	0	0.143812	-0.934856	-1.39287
ATCCACAAGAAAAACCGGAC	eStops	YHR118C	ORC6	0	-1.39125	-2.86163	-1.39255
ATAACCAAGAACCTGTGCTA	eStops	YGL145W	TIP20	0	-1.15124	-2.44496	-1.39194
TGTAACCATGTTTCTACCCC	eStops	YKL014C	URB1	0	-0.003957	-0.704529	-1.39134
AGATATTCAAGAGTCGTTCA	eStops	YDR464W	SPP41	0	-0.841005	-1.7448	-1.3907
TTTGCAATATAAGAACAAAT	eStops	YER036C	ARB1	0	-0.687663	-0.952878	-1.38996
GAAGCACAGCTACTGTTGGT	eStops	YFL005W	SEC4	0	-0.694156	-1.21244	-1.38856
TTTACAGGGATATAGGGACC	eStops	YDL105W	NSE4	0	-0.0872319	-0.618175	-1.38803
CTTATACAGTGGGCGGAGGA	eStops	YGL073W	HSF1	0	-0.348656	-2.19021	-1.38772
TTGAACCAGTCAGGACCATA	eStops	YMR309C	NIP1	0	-0.446549	-3.25133	-1.38766
TAATCAGGCCAAAATACTTG	eStops	YIL068C	SEC6	0	-0.792623	-1.98263	-1.38763
TCCTCAATCCACAGGATTTA	eStops	YIR006C	PAN1	0	-0.897404	-1.75954	-1.38761
CTACATTCAGAGTCATTATT	eStops	YBR004C	GPI18	0	-0.31936	-1.29895	-1.38651
ATGTTCAGTTTAAGCATTAT	eStops	YLR106C	MDN1	0	-0.788354	-1.93447	-1.38645
AAAGCCAACTGTTCAACGCT	eStops	YLL003W	SFI1	0	-0.524326	-1.05018	-1.38515
CACCCAAGTAGTCCGGAACA	eStops	YPL082C	MOT1	0	-0.280825	-1.69207	-1.38441
AGGTTCAGTTTGAAGGCGGC	eStops	YER147C	SCC4	0	-0.337367	-1.04158	-1.38355
TTTGAACAGATCGAAAACGA	eStops	YIL104C	SHQ1	0	0.0473	-0.413351	-1.38348
GAGGCAACATAACAATCACG	eStops	YIR022W	SEC11	0	-0.432594	-0.919371	-1.38317
ACCACAAATGAAAAAGCAAG	eStops	YHR186C	KOG1	0	-0.253154	-1.13153	-1.38307
GCTTCTCCACTGCTCTCTGG	eStops	YER018C	SPC25	0	-2.16301	-1.96768	-1.38228
GGTCAAAATGCTTCCATCAA	eStops	YKL060C	FBA1	0	-0.942154	-1.54251	-1.38152
TTTCTCAGCCATCGACAGGC	eStops	YNL251C	NRD1	0	-0.231697	-1.33581	-1.38122
CTATGTTCAAATTAACAACG	eStops	YLR106C	MDN1	0	-0.131389	-0.584162	-1.38119
CTATTCCGAATGAGTGGTGA	eStops	YOR336W	KRE5	0	0.246272	-0.749181	-1.38113
GGACTCCAGTTCAAATGGAT	eStops	YDR082W	STN1	0	-0.947986	-1.08007	-1.38048
GTACCAACAAATCTTGACCA	eStops	YHR020W	YHR020W	0	-0.89011	-2.00271	-1.38029
ATTCAATCCGCCTCACACAT	eStops	YOR340C	RPA43	0	-0.423831	-1.73484	-1.37961
CCGCCAACTTCCAGCTTACT	eStops	YNL247W	YNL247W	0	-0.610652	-1.47468	-1.37885
CACCCTCAAACTATTATTGA	eStops	YIL142W	CCT2	0	-0.498915	-1.7118	-1.37826
AGCCTTTCAATGGATCGGCG	eStops	YLR316C	TAD3	0	-0.0908921	-0.401217	-1.37825
AAGGCTCAACAAGCCACCGA	eStops	YMR208W	ERG12	0	0.253778	-0.618296	-1.3781
TTTATCAAGTTTATAACACC	eStops	YAR007C	RFA1	0	-0.96181	-1.81231	-1.37807
TCTCAACATGCTGATGAACT	eStops	YLR277C	YSH1	0	-2.15802	-2.81537	-1.37787
AAGACGACAGTCGAATGATT	eStops	YMR028W	TAP42	0	-0.272508	-0.932733	-1.37649
TTTAGCCATGTCTGCATTTG	eStops	YLR117C	CLF1	0	-0.705585	-1.2569	-1.37628
TACAACCATGTAAAGGCCGT	eStops	YPR113W	PIS1	0	-0.102518	-2.01831	-1.37613
AGCACAGGAACAGGCGAAGG	eStops	YFR037C	RSC8	0	-1.02946	-1.75525	-1.37529
GTAGACAGAAACAACGTGCT	eStops	YJL033W	HCA4	0	-0.578864	-1.2433	-1.37516
TAGTTCAAGAGGATAGGCAA	eStops	YJL054W	TIM54	0	-0.110722	0.163821	-1.37417
GATCCGAAGCGAAAACCTCA	eStops	YBR202W	MCM7	0	-1.34704	-2.17939	-1.37391
TAGAGCTCAGGATGCCGAGG	eStops	YJL111W	CCT7	0	-0.239774	-1.97024	-1.37318
AAATTTCAACAGATCGGCGC	eStops	YGR046W	TAM41	0	-0.506996	0.142674	-1.37259
TGTTTGCAAAGACCCAGCAG	eStops	YGL142C	GPI10	0	0.18498	-0.418215	-1.37246
TAACCAGTTATCATCAGTTT	eStops	YLR106C	MDN1	0	-0.17932	-1.094	-1.37203
GAGTACAGCTTGATAAAGCT	eStops	YBR192W	RIM2	0	-0.53021	-0.304618	-1.37179
CGCACAAGAACAGTGGCAAT	eStops	YJL081C	ARP4	0	-0.468311	-1.61471	-1.3714
AACCAAGCGGTTGACCTCAA	eStops	YML127W	RSC9	0	-0.69622	-1.35808	-1.37138
GTCCACCTTTCTCTTCTCGT	eStops	YDR041W	RSM10	0	-0.633281	-0.841124	-1.37082
CTATTGCAGGAAAACGAGTT	eStops	YDR489W	SLD5	0	-0.272828	-1.16788	-1.3697
TTCCTTCCAAGAGTCCACGA	eStops	YFR051C	RET2	0	-0.0763126	-0.646336	-1.3693
CCGAACAATATGAAAGGGAT	eStops	YER008C	SEC3	0	-0.866325	-1.63721	-1.36851
CCAGACCAATACACAAAGTT	eStops	YDL126C	CDC48	0	-0.469011	-1.05651	-1.36784
TAGATATCAAGAACTCACAA	eStops	YJL074C	SMC3	0	-0.362679	-1.62435	-1.36754
ATCATCCAATCCTCAAATTC	eStops	YNL262W	POL2	0	-0.357255	-1.61008	-1.36744
GCTGCAAAATAGTAACAATG	eStops	YDL031W	DBP10	0	-1.04535	-1.50183	-1.36717
AGCCAATGTGTAGTAAAAGT	eStops	YGL112C	TAF6	0	-0.260951	-0.671107	-1.36693
TCTCACAAGATTTCCAATTC	eStops	YER036C	ARB1	0	0.0116738	-1.13887	-1.36601
TACTCAAGTCACGAAGGACG	eStops	YPL028W	ERG10	0	0.0981473	-1.85922	-1.36496
TATTATCAAGCCAATATTAA	eStops	YGR103W	NOP7	0	-1.05453	-1.82654	-1.3645
GTGAATCAATGGGCCTTCAT	eStops	YMR208W	ERG12	0	-0.481711	-0.918218	-1.36403
AAATTCCCATAAAATCATAT	eStops	YNL172W	APC1	0	-1.48837	-2.33047	-1.3637
GCACCAAGTAAATCCAAAAG	eStops	YOR340C	RPA43	0	-0.256788	-1.68129	-1.36311
TTTCAAAAGGCACAGAAAAG	eStops	YGL075C	MPS2	0	-0.334453	-0.881329	-1.36273
TCAACAAATCGATGATGTCG	eStops	YGL093W	SPC105	0	0.380652	0.0313064	-1.36236
TCCACAACGTTTGTCCTTAT	eStops	YHR197W	RIX1	0	-0.00533996	-0.949547	-1.36215
GGTAAACAAGGTCGATTCAG	eStops	YOR116C	RPO31	0	-0.272127	-2.34451	-1.36202
CTTTGCCACTGTCTCAGCAG	eStops	YGL040C	HEM2	0	-0.0190235	0.0522261	-1.36054
CAACCAAGCGGTTGACCTCA	eStops	YML127W	RSC9	0	-0.369074	-1.7217	-1.36045
ATAAGACAGAAAAACTGGAA	eStops	YLR117C	CLF1	0	-0.332421	-1.12404	-1.35934
AAACCTCAATTGGTCCGTGT	eStops	YLR430W	SEN1	0	-0.971463	-1.28558	-1.35902
AATATATCAAGTTCCAGAAA	eStops	YNL221C	POP1	0	-0.0718135	-0.74874	-1.35885
ATTCCAGGTCGTTGTCGCTA	eStops	YKL210W	UBA1	0	-0.392439	-1.34172	-1.35764
AAAAGACAAGGTTATGAGGA	eStops	YCL054W	SPB1	0	-0.498537	-1.58741	-1.35696
GACCAACAAGCGGCATTTGG	eStops	YCR093W	CDC39	0	-0.141304	-0.661937	-1.35677
TCAGAACAACAACAGACCGT	eStops	YFR003C	YPI1	0	0.635623	-0.0669125	-1.35648
ATGCGACCAGTTCGTTATGT	eStops	YKR068C	BET3	0	-0.463537	-0.37577	-1.35616
CTGCCAATATGGTCACGTTA	eStops	YJL025W	RRN7	0	-0.150516	-1.05873	-1.35401
AGATTCCAGTTGACTTCCAT	eStops	YJL174W	KRE9	0	-1.58261	-2.66606	-1.35333
TTCACAAAACGATGCTAAAA	eStops	YGR185C	TYS1	0	-0.158176	-1.15218	-1.35267
TATGCCAACATTATATCGGT	eStops	YKL203C	TOR2	0	-0.175709	-1.58537	-1.35221
ACATACGACAAGCAATTTGC	eStops	YHR069C	RRP4	0	-0.823736	-1.7941	-1.35153
TAAGACAAGTAAAAGCTCAA	eStops	YBR237W	PRP5	0	-0.524821	-1.13295	-1.35137
ACTTTACAGTACCGTATGTG	eStops	YHR164C	DNA2	0	-0.111331	-1.02741	-1.35104
ACCCATGTAGTTAGAGTTAA	eStops	YFR051C	RET2	0	-0.440621	-1.36504	-1.35077
ATGCCATAACCGATTCAAAA	eStops	YHR065C	RRP3	0	-0.565037	-1.1696	-1.34996
ATTGAAACAATGTGATTTCA	eStops	YMR168C	CEP3	0	-0.0499151	-0.425974	-1.34941
CAGCCCAACGTGCGCGTAAT	eStops	YER018C	SPC25	0	-1.56233	-1.83216	-1.3486
ACATAACCAAACACCTCCTA	eStops	YDL017W	CDC7	0	-0.337784	-0.996667	-1.34836
ATTTCCAGGTGATAACCAAG	eStops	YGR116W	SPT6	0	-1.11905	-2.61411	-1.3478
ATGTACCAAATGATTACTAT	eStops	YLR086W	SMC4	0	-0.740903	-2.16931	-1.34768
TTCCATTGCAATTCATCCAA	eStops	YHR058C	MED6	0	-0.901934	-1.5259	-1.34624
TTATCACGATGGAAGCTATA	eStops	YHR166C	CDC23	0	-0.491598	-0.669692	-1.34595
TGTTACTCAAGGCATTATGC	eStops	YER093C	TSC11	0	-0.0961646	-1.18042	-1.34536
AGCCCAACTCAATTGTTCTG	eStops	YGR116W	SPT6	0	-1.37464	-1.97717	-1.34534
AGTTCACAACTGATTTATAA	eStops	YAL001C	TFC3	0	-0.394253	-0.73952	-1.34469
ACAGCCCAAAGACTTGGATT	eStops	YPL242C	IQG1	0	-0.776411	-1.5387	-1.34442
GTGCTCAATTGGTACAGACT	eStops	YKL014C	URB1	0	-0.148354	-0.997481	-1.34392
TACAACAAGAATTACATGAC	eStops	YDL017W	CDC7	0	-0.431817	-1.41922	-1.3434
ACGTCAGTTACGTGTATGCA	eStops	YMR288W	HSH155	0	-0.411964	-1.51317	-1.342
GATCAAACAGAAGCCGAACG	eStops	YER125W	RSP5	0	-0.455312	-0.881774	-1.34164
GTTTCAGCAGCATGAATTAG	eStops	YPR104C	FHL1	0	-0.115329	-0.858252	-1.34152
CAATCAAAAAAGTGGAGCCC	eStops	YHR164C	DNA2	0	-0.973845	-1.61825	-1.34
GTTGATCAAGTTGTCGTCAG	eStops	YIL021W	RPB3	0	-1.36791	-3.1204	-1.33995
GGCAGACAAGTTCTCATGCA	eStops	YHR024C	MAS2	0	-0.120953	-1.13956	-1.33938
CCTCAACAATCCACCATTGG	eStops	YGR119C	NUP57	0	-1.82881	-1.99361	-1.33921
TCGTTCCAGGGTGACAGGTT	eStops	YPR176C	BET2	0	-0.104481	-1.7011	-1.3383
TCCAGCAGAGATTGTCAATC	eStops	YPL169C	MEX67	0	-1.11606	-1.51715	-1.3383
CACTTTCAAGTCAATTCCAT	eStops	YLR166C	SEC10	0	-0.688522	-2.11617	-1.33742
TTTCCATTCTCTAAATGTAC	eStops	YJR042W	NUP85	0	-0.103676	-0.774396	-1.33691
CCACAAGAGGACCATCCAAA	eStops	YFR028C	CDC14	0	-0.494653	-1.76166	-1.33668
GGGGCAAGAAGAATACGAAA	eStops	YJL167W	ERG20	0	-0.454679	-0.418017	-1.33665
ACATTCAGACGAAGAAAATG	eStops	YBR080C	SEC18	0	-1.12527	-2.71548	-1.3365
TGGTTCAATATGTGGTAGAA	eStops	YJR141W	IPA1	0	-0.13819	-0.447875	-1.33635
GGAATCAAAAGGAGTATATT	eStops	YJL031C	BET4	0	-0.10698	-1.50119	-1.33624
TGATCAATTGGTTAGAGAAG	eStops	YGL120C	PRP43	0	-0.31552	-1.17568	-1.33541
CTTACAGAAAGCTAGACAAG	eStops	YGL075C	MPS2	0	-0.986835	-1.50604	-1.33538
CTTCCAATCGTGGCCTTCTG	eStops	YOL021C	DIS3	0	-1.08269	-1.77031	-1.33303
GCTACAAAAATCAGATGAAA	eStops	YGR098C	ESP1	0	-1.70938	-0.859925	-1.33265
TTTCATTCCATGAGATATAG	eStops	YGR116W	SPT6	0	-3.11869	-2.15793	-1.32965
AGGTTGTCGAACAAATGATA	eStops	YGL116W	CDC20	0	-1.88581	-1.3747	-1.32919
CTTTACCAATATAACTGTTT	eStops	YDR292C	SRP101	0	-0.451269	-1.53619	-1.32871
CCGCATCAGAATGTTATTAT	eStops	YJL074C	SMC3	0	-1.22837	-0.895747	-1.32851
CCCCATGGTGATTCCCACTC	eStops	YNL247W	YNL247W	0	-0.92415	-1.55272	-1.32832
AGCCAGGTAAAGAAACCCTC	eStops	YAR019C	CDC15	0	-1.091	-2.05293	-1.326
CTGCCCCCCAGTGATATGCC	eStops	YKL019W	RAM2	0	-0.00479292	-0.579639	-1.32514
TTCTCAAAATGAACATCCGC	eStops	YJR089W	BIR1	0	0.30275	-1.2611	-1.32502
GGTAACCAGCGTACCTGGGG	eStops	YBR080C	SEC18	0	-2.32559	-2.16057	-1.32378
TGAGACCAATCACCCTCAGC	eStops	YDL102W	POL3	0	-0.332961	-0.775233	-1.32301
GTTCTGCAGGATTTGAGACT	eStops	YJL039C	NUP192	0	-0.632359	-0.84727	-1.32255
TTTGGCCCATAGTTCTTCGC	eStops	YLL031C	GPI13	0	-0.349108	-0.610157	-1.32191
GAGCAACTAACAAAGGAATA	eStops	YNL308C	KRI1	0	-1.36764	-2.12025	-1.32113
AGGTTCAACAGGATGATAAG	eStops	YGR274C	TAF1	0	-1.79333	-2.99286	-1.32092
CAAGACAGGAATTACTCAGT	eStops	YPR178W	PRP4	0	0.375697	-0.337168	-1.32074
GCTCCATAATGATCTATCTT	eStops	YLR409C	UTP21	0	-1.27916	-1.94256	-1.31989
TCAAGAACAACCCAAAGTGG	eStops	YPR133C	SPN1	0	-1.04646	-1.44137	-1.3194
AAATCTCAAGATGATGAAAT	eStops	YJR064W	CCT5	0	-0.465177	-1.65348	-1.31911
GGCTCAAAAGAAGGCTCATT	eStops	YOR063W	RPL3	0	-1.62629	-1.99053	-1.31882
ACATCAGGTATTGCCTTCTC	eStops	YMR113W	FOL3	0	-0.127992	-0.327923	-1.31735
GACCCAAACGTTGTACGCTT	eStops	YBL040C	ERD2	0	-0.468331	-0.774611	-1.3166
GGTTCCCAAGGTTACGGTCA	eStops	YLR355C	ILV5	0	-1.64802	-1.97688	-1.3159
TAGTCAAGGCTTCAAAGCAA	eStops	YDL102W	POL3	0	-0.659778	-1.63206	-1.31584
CCTCAAGAGATATACAATGT	eStops	YJR002W	MPP10	0	-0.999778	-1.25645	-1.31507
ATCCAACCCTGTGGATTTGT	eStops	YBR055C	PRP6	0	0.00711742	-1.02558	-1.31415
AATGAACAGAATACCTCAAG	eStops	YBR247C	ENP1	0	-0.715319	-1.31095	-1.31338
ATCTCAGGATATTACCATTC	eStops	YBR252W	DUT1	0	-0.804098	-1.65144	-1.31328
TACTCAATGGCAAGATCAAC	eStops	YJL019W	MPS3	0	-0.712691	-1.93859	-1.31312
TTACAGCAAATACACCTTAT	eStops	YDR082W	STN1	0	-0.620581	-1.35325	-1.31283
TTGGGTCAACAAGCTTTAGA	eStops	YOR341W	RPA190	0	-0.577727	-2.46455	-1.31275
AGAGACAGAAGCACTTTGCT	eStops	YNL221C	POP1	0	-0.700019	-1.47901	-1.31243
TTACAAAGATTAGAATATAG	eStops	YKL104C	GFA1	0	-0.854556	-0.798401	-1.3122
TAAAAACAAAATATTGCCCA	Ctr3	YMR292W	GOT1	0	-0.311295	-0.919837	-1.31182
ATTCCAGAATGTATCGAACC	eStops	YLR066W	SPC3	0	-0.201044	-1.10104	-1.31173
AGCGTTCCAAAAGAAACTAC	eStops	YBR136W	MEC1	0	0.129338	-0.267725	-1.31171
GCAGTTTGATCATTATTCAT	Ctr2	NA	NA	0	-0.0887405	-0.858298	-1.31074
GCTCAAAACTTTCTACTATT	eStops	YPR175W	DPB2	0	0.0933824	-1.37293	-1.30902
AATACAGTCGCTGCCATTGA	eStops	YGR099W	TEL2	0	0.225976	-0.306429	-1.30891
ATGCCACAGCAGCCCCAAAC	eStops	YIR006C	PAN1	0	-1.2578	-1.96185	-1.30837
AATGAGTCAGATCACTATCG	eStops	YNL158W	PGA1	0	-0.492072	-0.676533	-1.30796
ATTCTCCACTGCTCGAAAAG	eStops	YGR099W	TEL2	0	-0.893897	-2.13038	-1.3074
CTCCTATCAGTTATCAACAG	eStops	YMR001C	CDC5	0	-0.830002	-1.68439	-1.30708
TTATCGAATGGAACGTATTG	eStops	YBR136W	MEC1	0	0.617426	0.090954	-1.30707
AAGTATCAATCGTCCACAAA	eStops	YFR002W	NIC96	0	0.00770674	-0.770799	-1.30557
AATTGCCACCTAGGGATGAA	eStops	YNL313C	EMW1	0	-0.668232	-0.266143	-1.30552
GCCCAATTAATAGCACATGC	eStops	YGR091W	PRP31	0	-1.09568	-1.01625	-1.30532
GGTTCAAATCAAGTCTCTTT	eStops	YML043C	RRN11	0	-0.489296	-1.57096	-1.30501
AACACACCACTGTCTTAGTA	eStops	YHR186C	KOG1	0	-1.21725	-1.98726	-1.30475
GAGAACAAAAACGAGTTAGG	eStops	YDR141C	DOP1	0	-0.955653	-1.61504	-1.30339
ACATTCAACTAATTGGATTG	eStops	YLR106C	MDN1	0	-0.5032	-1.45626	-1.3029
TGTTTCAAAGATATGCTGCT	eStops	YJL143W	TIM17	0	0.518385	-0.154763	-1.30264
GTGCCACAAGAACGAGCCTC	eStops	YKL203C	TOR2	0	-0.73184	-1.22243	-1.30238
AAAGTCCACAATTCAGGAGT	eStops	YJL125C	GCD14	0	-0.000543068	-0.681369	-1.30091
GCCTACGAGCCATCAAAAAA	eStops	YJL019W	MPS3	0	-0.372032	-0.726959	-1.30066
CTACCAAGAAACCATAGGCG	eStops	YDR188W	CCT6	0	-0.766534	-1.86484	-1.29916
CTGCCCAATGGTCAGCTACT	eStops	YHR165C	PRP8	0	-0.306387	-1.73487	-1.29852
CCAACCAATATCAATATTAT	eStops	YLR106C	MDN1	0	-0.286097	-0.988057	-1.29833
ATATCAGATATTTAATCTCA	eStops	YMR113W	FOL3	0	-0.692601	0.00475931	-1.29722
TCCGAACAAACAGCTATTAA	eStops	YPR162C	ORC4	0	-0.273543	-0.911946	-1.29682
CTTCAGTACACGGCGTTAAC	eStops	YPR034W	ARP7	0	-0.463168	-1.38398	-1.29663
GGTATCCAGAATGGTTCGCA	eStops	YLR008C	PAM18	0	-0.216241	-1.17597	-1.29579
TTCTCCATAATTTAACTTGA	eStops	YDL145C	COP1	0	-0.858958	-1.67029	-1.29521
TCTCGTCAACTTTATGTGTT	eStops	YKL210W	UBA1	0	-1.35682	-1.60349	-1.29416
GAACCATGGCAACAACTTCT	eStops	YKL060C	FBA1	0	-1.84731	-2.8583	-1.29401
GAACTTCAAAAGGAACTGGA	eStops	YGR046W	TAM41	0	0.00282591	-0.315398	-1.29386
TCATCCCATTCTTTATCGCT	eStops	YDL209C	CWC2	0	-0.212665	-0.815366	-1.293
CTACTCAAGACTACACTTTG	eStops	YGL093W	SPC105	0	0.337807	0.346249	-1.2927
GCCCCAGACCCCAGCGTATC	eStops	YLR305C	STT4	0	-0.346245	-1.36973	-1.29219
CTTGCCATTCGGGAAGGAAA	eStops	YLR305C	STT4	0	-0.578917	-1.1233	-1.29176
CGTGTTCAAGTCACCTTCCA	eStops	YOR077W	RTS2	0	0.174677	-0.133695	-1.29116
GTACCAATACGACCCAACTA	eStops	YGL055W	OLE1	0	-0.571666	-1.47008	-1.29112
ATTTACAAAATGATCCCACA	eStops	YCR093W	CDC39	0	-1.05514	-0.793367	-1.29048
CCACCACAAGAAGGCTTAAG	eStops	YGR029W	ERV1	0	0.457949	-0.282626	-1.29046
TGATCAAAAGGAGACCAAAA	eStops	YOR098C	NUP1	0	-0.156403	0.0188446	-1.28904
CCTTCCAACCAGTCAACTTC	eStops	YER126C	NSA2	0	-0.194334	-1.21748	-1.28804
CAAGCAATTAGACATTGGAA	eStops	YJL035C	TAD2	0	-0.388251	-0.529692	-1.28781
ATCCAGCCCAATTCTTTATG	eStops	YOR326W	MYO2	0	-0.57034	-1.14994	-1.28602
TCCTCAAGACCATCAAGTTC	eStops	YNL132W	KRE33	0	-0.212398	-1.37682	-1.28589
CCATCAACTGGCGACTGCTG	eStops	YMR277W	FCP1	0	-0.148471	-0.927847	-1.2858
GGTCAGGGTGCTTCGGCTGT	eStops	YBL023C	MCM2	0	-0.901266	-1.86451	-1.28568
AAAACCAAACCGCACATGTA	eStops	YOR056C	NOB1	0	-1.14356	-1.26338	-1.2842
TTGCAAAAATGGGTCGAAAT	eStops	YFL022C	FRS2	0	-1.19741	-0.615324	-1.28293
GTTGCAACCATTCCTTAACA	eStops	YNR016C	ACC1	0	-0.95447	-1.34218	-1.28213
GCTCAACTAAAAAGGAAGGG	eStops	YPL082C	MOT1	0	0.276221	-1.34536	-1.28208
AGTCAAAGGAGCACGCTAGC	eStops	YPR056W	TFB4	0	-0.0649088	-0.880656	-1.28124
ATATCAACCAGAGATGAAAT	eStops	YOR077W	RTS2	0	-0.371106	-1.14415	-1.28124
GGGCACCCAGGGCCCTCAAA	eStops	YLR378C	SEC61	0	-0.354286	-0.925215	-1.28084
TCACTCAGAAGGTGTTTGTA	eStops	YOL021C	DIS3	0	-1.45692	-1.86205	-1.28055
ACATCACAGGAAAATTTGAG	eStops	YGR216C	GPI1	0	-0.386231	-1.61074	-1.28052
GTTCAAAAAATTATTGATAA	eStops	YNL247W	YNL247W	0	-0.709488	-0.731549	-1.28041
TTTGCCTCAGTGTTATATTG	eStops	YGR024C	THG1	0	-0.474111	-1.55016	-1.27937
TATGAACAAGCTCCCATGCC	eStops	YMR213W	CEF1	0	-0.329788	-0.687143	-1.27922
CCAGCAGCAATGTCCCGCCC	eStops	YOR373W	NUD1	0	-0.969703	-2.24223	-1.27891
CTTCCAACCAGTCAACTTCT	eStops	YER126C	NSA2	0	-0.332807	-1.09876	-1.27878
AATTGTCCAGCCAGCAGCCA	eStops	YER023W	PRO3	0	-0.0165421	-0.436352	-1.27839
CAGCAACAGTATAATCCTCA	eStops	YDR172W	SUP35	0	-0.334455	-0.927491	-1.27815
GTCCAAAGAACATCAAAGAT	eStops	YLR106C	MDN1	0	-0.53808	-2.43317	-1.2777
GGAACAGAGCGTCCTTGCGT	eStops	YDR201W	SPC19	0	-0.937373	-2.12376	-1.27754
TAACCAATATGGAGATCAAA	eStops	YGR009C	SEC9	0	-0.319835	-1.81464	-1.27735
CCACCATGTGGACTCCATAA	eStops	YBL076C	ILS1	0	-1.10572	-1.65201	-1.27657
ATGAGACAGCGAGAAGAAGT	eStops	YOR048C	RAT1	0	-0.59202	-0.680743	-1.27648
GTTCCAGGGTGACAGGTTTG	eStops	YPR176C	BET2	0	0.400327	-1.20007	-1.2759
GTCAGACTGGGGAAACTAGT	Ctr3	YNR016C	ACC1	0	-0.399762	-0.531267	-1.2759
ACAACAGTTGTCATTGGTCA	eStops	YDR311W	TFB1	0	-0.0434245	-0.660236	-1.27562
TTCTTCAAGTTTGTTCTCAT	eStops	YDR060W	MAK21	0	-0.494083	-1.45291	-1.27493
ACTTTCTCAAGACATTAGCA	eStops	YKL033W	TTI1	0	-0.428299	-2.20288	-1.27474
TCAATGTCCAAACTGGTTTA	eStops	YLR196W	PWP1	0	-0.555787	-1.15245	-1.27429
ACGAAATCAGGTTGAAGTTC	eStops	YML064C	TEM1	0	-1.61244	-3.24677	-1.27396
CAGCCACTCGAGCATTGATT	eStops	YLR115W	CFT2	0	-0.631558	-0.760042	-1.27323
AACCAACAAAGTAGTACAGG	eStops	YGR119C	NUP57	0	-1.31735	-1.86307	-1.27283
CTGAGTCAGCAAGTCGTGGC	eStops	YDR047W	HEM12	0	0.0476491	-0.372393	-1.27216
TATCACAGGCATATTGCCAT	eStops	YFR042W	KEG1	0	-0.718639	-1.91305	-1.27216
ATAACCATAGATACAAATCT	eStops	YOL077C	BRX1	0	-0.659723	-1.23353	-1.27007
AACCCAATCAATAACTAAAC	eStops	YGR191W	HIP1	0	-0.360889	-1.6539	-1.26985
TTCCACTCAGGAAAGTAATC	eStops	YMR033W	ARP9	0	-0.484025	-1.43075	-1.26929
GTTGAGAGAAGTTCATCAAG	Ctr2	NA	NA	0	-0.86963	-1.12774	-1.26853
CAACCAAGTAGGTGATGTCG	eStops	YIR022W	SEC11	0	-0.171055	-1.42124	-1.2682
ACTCAAATACAGAACGAAGA	eStops	YOR341W	RPA190	0	-0.802758	-1.74978	-1.26712
GATCAGGAGGAAAATGTTGC	eStops	YPL012W	RRP12	0	-0.270113	-0.968993	-1.26647
AAAATCCAGGTAGCGTCTCT	eStops	YLR215C	CDC123	0	0.0808462	-1.30409	-1.26587
AGATACAAACCTCCCTGGTG	eStops	YGR195W	SKI6	0	-0.945412	-1.1857	-1.26578
AAGGTCCAAGACTATCGAAA	eStops	YLR022C	SDO1	0	-0.423493	-1.41849	-1.26565
TGCGTCAATGGCAAGAACTT	eStops	YKR063C	LAS1	0	-0.180901	-1.12447	-1.2646
GGCCCAATTGATGAACAATT	eStops	YKR083C	DAD2	0	-0.687378	-1.50136	-1.26396
GGAACAGTACTGGGATAGAA	eStops	YMR168C	CEP3	0	-0.250837	-0.623509	-1.26266
ATCCAGCAGAGATTGTCAAT	eStops	YPL169C	MEX67	0	-0.449683	-0.600048	-1.26223
TCACCCCCCATGGATAGGAA	eStops	YLR314C	CDC3	0	-1.95707	-2.66839	-1.26187
AAACTCAAGAGCAGCTGCAA	eStops	YNL088W	TOP2	0	0.0720511	-1.10394	-1.26069
AGAACAATCATCCAAGAAAA	eStops	YOR287C	RRP36	0	-0.34115	-1.37589	-1.26059
GATCGAACAAATTTACCTGT	eStops	YHR023W	MYO1	0	0.0359605	-0.043204	-1.26041
GCAAGTCAAGTTCCACTGGA	eStops	YNL172W	APC1	0	-1.18211	-2.76391	-1.26035
CATGCTCAGCAGCAATTGGT	eStops	YPL190C	NAB3	0	-0.268208	-0.796114	-1.25905
GCCCTCGAGACTTCAAAGCA	eStops	YHR166C	CDC23	0	-1.61865	-2.89728	-1.25844
TCATGTCAGATCAATCAAGA	eStops	YCR093W	CDC39	0	-1.11658	-2.53828	-1.25765
AACTCAAGAGTCATACGCTA	eStops	YMR061W	RNA14	0	-1.13727	-1.0807	-1.25524
AAGCCAAACACCTACAATTG	eStops	YJL111W	CCT7	0	-1.14869	-2.80808	-1.25501
CTTTCAAAAGCAACAAAAGC	eStops	YDR172W	SUP35	0	-1.50922	-2.12442	-1.25321
TTATTACAGGCCGCTTACAG	eStops	YOR326W	MYO2	0	-0.113243	-1.17414	-1.25298
TCGGATCCCAAGAAGGAGCA	eStops	YPL082C	MOT1	0	-0.64722	-0.859434	-1.25219
TATGCCACGATAATGCGATG	eStops	YDL207W	GLE1	0	-0.653849	-2.31968	-1.25139
TCCCAGATCGCATAAGAAGG	eStops	YHR020W	YHR020W	0	-1.28456	-1.47346	-1.25127
TTGCCAGTTCCAGATTCTTA	eStops	YDL145C	COP1	0	-0.986523	-1.88776	-1.25121
AATAAACCAAGGTGAAGAAC	eStops	YKL078W	DHR2	0	-0.605018	-0.597803	-1.25118
CATACAGAATGTTGGCTCTA	eStops	YGR216C	GPI1	0	0.0614295	-0.931806	-1.25029
CACGCAAAGGCATTTCACAA	eStops	YLR222C	UTP13	0	-1.09812	-1.99421	-1.24985
AAGCGTCGAGACCAATTATT	eStops	YNL262W	POL2	0	-0.874061	-2.3904	-1.24984
TCAAACCAAGAGGCAAACGA	eStops	YFR037C	RSC8	0	-1.23151	-1.86821	-1.2495
GGAACAAGTGTCCATTAAGC	eStops	YLR314C	CDC3	0	-0.754789	-1.376	-1.24805
GTACAATCAGGTTTCCAGTC	eStops	YPR113W	PIS1	0	-0.456945	-0.667436	-1.24803
GCCATCCAAAATGAGCTAGA	eStops	YHR172W	SPC97	0	-1.62097	-1.2266	-1.24714
CTATCTTCAACTTGCAGAGC	eStops	YPR144C	NOC4	0	0.367998	-0.525919	-1.24711
GCAATAATACGAGCTTGATC	Ctr2	NA	NA	0	-0.177628	-0.638256	-1.24695
AGTTCGAGTCAGCTCTGTAA	eStops	YDL120W	YFH1	0	0.329828	-1.00521	-1.24683
CGTTCTTCAAAGAACGAAAC	eStops	YIL147C	SLN1	0	-0.249672	-1.28834	-1.24653
CCAAAACCCAAGGTCTGGAG	eStops	YDL145C	COP1	0	-1.89687	-2.69767	-1.24573
GCCCATCAAAACACAGAAAC	eStops	YLR106C	MDN1	0	-0.802914	-2.30198	-1.24554
TGAGCAATGCATCAAGTACT	eStops	YLR115W	CFT2	0	-0.470787	-1.21572	-1.24438
GTATCAAGAGGATTATGATA	eStops	YHR101C	BIG1	0	-0.300019	-1.03305	-1.24421
ATACTACATAACCAACGTCA	Ctr1	NA	NA	0	-0.147644	-0.64593	-1.24365
AAATCAAGAAGAAAAAAGCT	eStops	YLR276C	DBP9	0	-0.872287	-1.63317	-1.24343
TCTGATTCAAGCTATGAGGA	eStops	YLR106C	MDN1	0	-0.196661	-1.03912	-1.24277
AACTCAAATAAACAAAAAAT	eStops	YIL019W	FAF1	0	-0.874799	-1.1641	-1.24227
AATTCCAAAGACGTATAGAA	eStops	YKL021C	MAK11	0	-0.31774	-1.38575	-1.24192
GGTACCCCAAATTATTCTCA	eStops	YPR019W	MCM4	0	-0.797483	-2.29093	-1.24171
ACCTACAGAACGGTATGTTC	eStops	YDR235W	PRP42	0	-0.519873	-1.62159	-1.24091
GCGTCAATACTTTACAGACC	eStops	YLR106C	MDN1	0	-0.551174	-2.14361	-1.23969
ACACCATAAGGTATCAGGTG	eStops	YJR006W	POL31	0	-0.274381	-1.02728	-1.23883
GCGGAACAGAGCGTACTGAA	eStops	YDL102W	POL3	0	-0.633045	-1.9579	-1.23875
ATGTGCAGTCAGATGGGTTG	eStops	YPR085C	ASA1	0	0.231489	-0.159256	-1.23874
AATCCTCAACAGCTGTTGAA	eStops	YIR010W	DSN1	0	-1.06642	-0.893115	-1.23828
TAGGTCAAGTAGTAGGTCAA	eStops	YOR250C	CLP1	0	-1.59193	-2.308	-1.23818
AATGCAGAAGACTATAAATA	eStops	YBR142W	MAK5	0	-0.091124	-0.765224	-1.23812
GATCAATGCCCTTTAGTGAT	eStops	YDL008W	APC11	0	-0.0797598	-1.24835	-1.23784
GATTATCGAATGGAACGTAT	eStops	YBR136W	MEC1	0	0.131134	-0.674828	-1.23752
GGTCAACCAGTACTTGGCGT	eStops	YPL160W	CDC60	0	-1.1108	-1.58498	-1.23696
AATTCAAATTGATGCCTCTA	eStops	YDL084W	SUB2	0	-0.500711	-1.02391	-1.23666
CCATTCAACCAAATAACACT	eStops	YKL186C	MTR2	0	-1.84701	-2.36851	-1.23629
TGATCCTCAATCTTTCAGGT	eStops	YPR181C	SEC23	0	-0.791899	-1.11541	-1.23485
CCACCATTGTTTCCATTCTT	eStops	YGR264C	MES1	0	-0.679599	-1.58188	-1.23468
GTGCATCAGAAAGTGCCGTC	eStops	YOR373W	NUD1	0	-1.17891	-2.08195	-1.23406
CGTCCAGAGTGCTATCCTGT	eStops	YNL132W	KRE33	0	0.176339	-1.17197	-1.23352
ATCTTTCCAACACATATTTA	eStops	YIL091C	UTP25	0	-0.182615	-1.06545	-1.23348
ATTCAATTCCAAAACAAAGG	eStops	YGR145W	ENP2	0	-0.234735	-1.30844	-1.23341
TATCTCAACTGAAAAGTTTG	eStops	YJL005W	CYR1	0	-0.38103	-1.6953	-1.23268
AATCAAAGAAGCGGTAGAGC	eStops	YMR128W	ECM16	0	0.0877557	-1.81464	-1.23019
TTCCAATCGTGGCCTTCTGC	eStops	YOL021C	DIS3	0	-1.32943	-2.02898	-1.22955
TCGTTCAAGCTTGTTTAATT	eStops	YLR347C	KAP95	0	-2.30379	-2.62554	-1.2295
TCATCCCATGTAATTGTGCG	eStops	YLL035W	GRC3	0	-0.746112	-1.77871	-1.22898
TCCCAGACACCCCAGTTAAA	eStops	YDR081C	PDC2	0	-0.256694	-1.17516	-1.22778
ATTAAACAAGCGCTAGCTCA	eStops	YNL075W	IMP4	0	0.263928	-0.863803	-1.22773
TTCCAAATTAAGGACGATTC	eStops	YMR001C	CDC5	0	-0.476171	-0.818914	-1.22565
TATTTACGACAAATATTCAA	eStops	YPL020C	ULP1	0	-0.378953	-0.771884	-1.22432
CTGCCCAGTGTGCTAGAGGA	eStops	YIL147C	SLN1	0	-1.37693	-1.96576	-1.22421
CCCCATAAATCGTTAGGACC	eStops	YPR175W	DPB2	0	-0.79493	-1.89746	-1.22298
TCATCCAAGAAATGAACAGA	eStops	YJL019W	MPS3	0	-0.588861	-1.8649	-1.21917
AGTCAATTATTATTCATTGT	eStops	YLR272C	YCS4	0	-0.151592	-1.3887	-1.21907
CTCCATGCAGGCTCTTGAGC	eStops	YDL064W	UBC9	0	0.504641	-0.0645272	-1.21892
CAAGCAGGTGATGGAAAAGA	eStops	YBR060C	ORC2	0	-0.0751926	-0.797005	-1.21887
TTCTCAATTAGCACTGGATA	eStops	YLR274W	MCM5	0	-1.12961	-1.11613	-1.21748
GTAGCCCAAGGCACTACCAC	eStops	YDR487C	RIB3	0	-0.00937983	-0.720329	-1.2166
TCATCACAACAATTCCCAAT	eStops	YDL195W	SEC31	0	-0.420809	-1.03334	-1.21617
CTACCGACTGAAAAAGACAT	eStops	YLR310C	CDC25	0	-1.41361	-2.37881	-1.21427
AGGGTCCCGAACGGTGAGTG	eStops	YFR003C	YPI1	0	-1.02882	-1.2352	-1.21265
CCACAGGGTATGACCATTAT	eStops	YHR072W	ERG7	0	-0.312299	-0.746002	-1.21263
AGTCAACCGCCACTTCCATA	eStops	YNL124W	NAF1	0	-0.136596	-0.190385	-1.20808
GCACTCTCAAATGCCCCAAC	eStops	YHR169W	DBP8	0	-1.49371	-2.5353	-1.20806
TCAACAAAAGATTCAAGCTG	eStops	YHR005C-A	TIM10	0	-0.308419	-0.557621	-1.20766
CGTCGTCAACTACGAATTTA	eStops	YJL005W	CYR1	0	-0.7587	-1.2139	-1.20742
GGACCAGCCAAACCCAGCAA	eStops	YBL034C	STU1	0	0.0424013	-0.446166	-1.20609
TGCCCCAAAAGGGTTCTGGT	eStops	YML025C	YML6	0	-0.239078	-0.366933	-1.20566
GCAAAAGCAAGAAATATATG	eStops	YOR257W	CDC31	0	-0.740125	-0.752154	-1.20524
CATGGTCCAAGCACTCTCTG	eStops	YIL104C	SHQ1	0	-0.0613171	-0.96066	-1.2047
AGTGCAAACATACTTGTCTA	eStops	YFR051C	RET2	0	0.139624	-1.3811	-1.20415
CTGTACGAAAGATTGTCCGA	eStops	YGR216C	GPI1	0	-0.271128	-0.583581	-1.20388
ATGGGCAAGAGTGTGATTGG	eStops	YNL161W	CBK1	0	-0.947113	-1.05767	-1.20334
CCCCAATATTTGGTAGAAGA	eStops	YNR011C	PRP2	0	-0.645945	-0.971905	-1.20261
CATCAAGTTTGCACACCAGG	eStops	YER023W	PRO3	0	0.165362	-0.352684	-1.20231
CAACAGCGGGATAACAAGGA	eStops	YLR106C	MDN1	0	-0.785744	-0.794763	-1.20085
ACGACAATTAATTTACCCAT	eStops	YOR206W	NOC2	0	-0.713849	-1.12252	-1.2008
CCCACAAATGCTGGCTAATG	eStops	YLR071C	RGR1	0	-0.181931	-0.500111	-1.20075
CAAACAGTTAAAAGATCACA	eStops	YGR251W	NOP19	0	-0.00268015	-0.475304	-1.20008
ATTACAAACCGTTTCCAACA	eStops	YPR088C	SRP54	0	-0.420796	-1.38649	-1.19982
TGATCAATTCAACAATGATG	eStops	YDR208W	MSS4	0	-0.760115	-1.80291	-1.19962
GGTCAACAGCAAAATTCATT	eStops	YMR047C	NUP116	0	-0.594782	-1.00785	-1.19954
TCTCCAGGAAATTCCTGATT	eStops	YGR090W	UTP22	0	-0.119332	-1.47156	-1.19806
TTTGGTCAAAAGCCAGCAAC	eStops	YMR047C	NUP116	0	-0.127387	-1.04674	-1.19732
TTCGTTCTTTATCATGCTTC	Ctr3	YGR096W	TPC1	0	-0.560261	-0.496444	-1.19628
TTGCCAGTGCAGAGTTACGT	eStops	YOR361C	PRT1	0	-1.48119	-2.51122	-1.19509
GATATACCATAAAATATGAG	eStops	YBR136W	MEC1	0	-0.0384433	-0.706528	-1.19484
TTTACAAATCATAAAGCTAG	eStops	YOL094C	RFC4	0	0.19527	-1.7899	-1.19413
GACTTCTCCATTCCACATCA	eStops	YBR234C	ARC40	0	-1.66394	-2.05759	-1.19366
TAAACAGCAGTCTTACACTC	eStops	YML077W	BET5	0	-0.246311	-0.883612	-1.19358
TATCAAGACATGGCGCGCGG	eStops	YPR181C	SEC23	0	-0.611748	-2.09369	-1.19285
TAGTACAACACAATGTAAAT	eStops	YBR110W	ALG1	0	-0.252509	-0.770927	-1.19212
CGTCAACTACGAATTTACGG	eStops	YJL005W	CYR1	0	-1.95944	-2.37945	-1.19162
GTTCCAAAAAGAAGATGATT	eStops	YMR061W	RNA14	0	-2.46886	-2.20308	-1.19103
GTGCCATCCATAATCGCTTC	eStops	YDR240C	SNU56	0	-0.372907	-0.687797	-1.18945
GACCATTCACCGGTTAAGTA	eStops	YKL182W	FAS1	0	-0.59367	-1.23453	-1.18789
TTCACAACATAATTCTACAT	eStops	YKL022C	CDC16	0	-0.245557	-1.42851	-1.18726
GCTACCTCAATCAGAATGGA	eStops	YOL021C	DIS3	0	-0.337409	-1.1998	-1.18706
TCGGGCCAATCTCTATCTGT	eStops	YDL108W	KIN28	0	-0.346251	-1.48561	-1.18675
GTTTCACAACAAACAGAAAC	eStops	YLR106C	MDN1	0	-0.539944	-0.522383	-1.18575
TCTTTCCCAATCCTTCCATG	eStops	YDR376W	ARH1	0	-0.220075	-0.588204	-1.18563
GTTTGCCAGTATACGATGAG	eStops	YCR072C	RSA4	0	-0.510802	-1.54863	-1.18549
CCTACCAGGAACTAGCGTAT	eStops	YML031W	NDC1	0	-1.00809	-1.79736	-1.18487
TTTCAAGAGGCCTCCGAAAA	eStops	YGR185C	TYS1	0	-0.473434	-1.69329	-1.18332
GTCTTTCCCACAGCTCGTCC	eStops	YLR424W	SPP382	0	-0.230257	-1.20597	-1.18216
TTCTTCCAATTGGTTCACCA	eStops	YBR196C	PGI1	0	-1.21554	-1.95513	-1.18205
AAATCAAGAGTCTGTGGAAG	eStops	YBR049C	REB1	0	-0.782215	-0.758315	-1.1808
ATCACAAGCCGTAATCCAAC	eStops	YJL050W	MTR4	0	0.0725759	-0.940838	-1.18023
GAACCAATTACAACAAGACT	eStops	YBL034C	STU1	0	-0.46227	-0.564863	-1.17973
TTCCAGAAGGTAATTGGAGA	eStops	YLR106C	MDN1	0	-0.599731	-1.17785	-1.17823
GATCAAAAGGAGACCAAAAA	eStops	YOR098C	NUP1	0	0.34817	0.0502311	-1.17783
AGGGAACAGATGACAAAGCA	eStops	YNL161W	CBK1	0	-0.801876	-1.28507	-1.17765
AGAACAAAACAGGGAGAGAA	eStops	YAL025C	MAK16	0	-0.452994	-0.952065	-1.17694
TCTCCTCAACTAGTATCATG	eStops	YFR029W	PTR3	0	-0.533403	-0.403079	-1.17642
ACCGATCTCCACGGTTTCTT	Ctr3	YKL182W	FAS1	0	-1.26471	-1.37627	-1.17576
AATATCAACGCATTTCCAAA	eStops	YDL148C	NOP14	0	0.0246249	-2.03211	-1.17544
CTTCACAATTGCTGTTAGAA	eStops	YOR207C	RET1	0	-1.90951	-2.6392	-1.17461
TGGCCATAAATCTGTTACTT	eStops	YKR037C	SPC34	0	-1.02767	-1.67298	-1.1746
TATTTCAGACTGTCTTGAAA	eStops	YHR107C	CDC12	0	-0.782788	-0.76558	-1.17382
TGAACCATCTGGAGAATTCT	eStops	YAL003W	EFB1	0	-0.363967	-1.11477	-1.17299
AGGACTCAGGAAGGGAAATT	eStops	YLR007W	NSE1	0	-0.22157	-0.439068	-1.17238
TATGCAAGGCGTAGACGTCA	eStops	YBR142W	MAK5	0	-0.561081	-0.809185	-1.17215
TTAACCAACCAACGAATATC	eStops	YLR323C	CWC24	0	-0.185923	-0.848093	-1.17027
TCTCAATTAGAGGCTATTCT	eStops	YKL014C	URB1	0	-0.0465667	-2.0567	-1.16984
ATTGGCCCAGGACTTCTTAT	eStops	YKR002W	PAP1	0	-1.39085	-1.79299	-1.16963
TGTCCAATAACGGAGGGCCG	eStops	YOR048C	RAT1	0	-1.03452	-1.1636	-1.16953
GCCAATCAATTAACCGTTTG	eStops	YPL231W	FAS2	0	-0.89413	-1.65517	-1.16831
GCCACAGAGGAGATCATCTA	eStops	YNL181W	PBR1	0	0.0981214	-2.39257	-1.16752
AACCAAATGACAGATTCATT	eStops	YKL006C-A	SFT1	0	-1.37247	-1.95934	-1.16736
ATTGCCAGAGATCTTCGATT	eStops	YPR190C	RPC82	0	-0.312262	-1.38462	-1.16676
AACCAACAATATGTTGCAGC	eStops	YKL182W	FAS1	0	-0.126021	-0.194419	-1.16669
GTCTTACAATACAAGGATTC	eStops	YNL262W	POL2	0	-0.538557	-1.15549	-1.16668
ACCAGCACAATTAACGACCT	eStops	YLR359W	ADE13	0	-0.709674	-0.474554	-1.16577
GTCCAGGGCGTCGCTGACGG	eStops	YJL005W	CYR1	0	-0.448408	-0.741987	-1.16517
TTTCCAAATGTGGACGGAAG	eStops	YMR059W	SEN15	0	-0.0701362	-1.06422	-1.16502
GGAGGATCAGATTCTTAAAG	eStops	YMR213W	CEF1	0	-1.61201	-1.68645	-1.16407
GACTGGAAAAGAAAATTGCA	Ctr2	NA	NA	0	-0.374161	-0.134482	-1.16336
TTGTTTCAACAACAAAATGT	eStops	YDR082W	STN1	0	-0.453841	-1.08796	-1.16317
GTACCAACGTTCTTGTGATA	eStops	YOR074C	CDC21	0	-0.447169	-0.841257	-1.16189
TCTTCAACCTTTACTGCCAA	eStops	YKL173W	SNU114	0	-0.248646	-0.646	-1.16165
CAAGACAAATCTTCTCTAAA	eStops	YNL290W	RFC3	0	-0.0172603	-0.557887	-1.16136
GCAACAACAGCAACAAGGAA	eStops	YIL129C	TAO3	0	-0.397763	-0.876586	-1.16097
CAATTTCAACTTATTACACA	eStops	YNL267W	PIK1	0	-0.344497	-0.983953	-1.16042
TGGTTACAAAAGCATCCAGA	eStops	YPL082C	MOT1	0	0.0473663	-0.748228	-1.15921
GATGCAAACCATTACGCGCG	eStops	YMR168C	CEP3	0	-0.962246	-0.74139	-1.15841
AACTCAACAAACACTTGCAC	eStops	YDR292C	SRP101	0	-0.909793	-1.58648	-1.15836
GCGGAGTCCATGCCTGAACG	eStops	YFR028C	CDC14	0	-0.0735503	-1.02967	-1.15778
AATCCAAATATTCAACTTCT	eStops	YMR229C	RRP5	0	-0.447874	-1.20879	-1.15713
GTTGTTCAAGTTTACGACAA	eStops	YLR340W	RPP0	0	-1.55833	-2.09654	-1.15677
AAGACAAGGTGAACGTTTAA	eStops	YML093W	UTP14	0	-0.197931	-0.625933	-1.15631
CCACCAACTATAGCAAACAT	eStops	YPR176C	BET2	0	-0.475918	-1.41851	-1.15536
AATGTCCAAAATAAATGGGT	eStops	YIL118W	RHO3	0	-0.57365	-0.718391	-1.15474
AGGACTCAAGTGAATACTGG	eStops	YLR071C	RGR1	0	-0.955735	-2.45274	-1.15364
ATCACAATCTGTTGCAGACT	eStops	YJL033W	HCA4	0	-0.457261	-0.957401	-1.15342
AAATCAACCATGGTACTATA	eStops	YDR088C	SLU7	0	-0.154931	-0.391657	-1.15246
GTTGCTCAGTCCAAGCAGAA	eStops	YOL010W	RCL1	0	-0.239023	-0.807695	-1.15109
CACATCCAGATCGGATTTGA	eStops	YHR024C	MAS2	0	0.0242225	-0.716771	-1.15087
CGTATCCGATCAAAGGGACA	eStops	YDR238C	SEC26	0	-0.931398	-1.83784	-1.15071
ATCCTCAATTACGCTTCGAT	eStops	YJR046W	TAH11	0	-0.389017	-1.6379	-1.15063
CATCAAGCAGCCAAAATAAC	eStops	YKR086W	PRP16	0	-0.0152212	-0.876064	-1.1504
GTCATTCAAATTGCATTGGA	eStops	YNL132W	KRE33	0	-0.587482	-1.69235	-1.15032
CCTCAGGGCCAGAAACAAGG	eStops	YIL062C	ARC15	0	-1.78256	-2.08822	-1.14975
CACGCCAAACTGGGCCTTCG	eStops	YLR208W	SEC13	0	-1.29816	-1.81773	-1.14962
AATGATCAGTTGTACGGCAA	eStops	YGL207W	SPT16	0	-0.80998	-1.76568	-1.14958
ATTCAAATCGTCAGTAAAGA	eStops	YDR398W	UTP5	0	-0.309664	-1.08356	-1.14857
CTTACAATTTCAGAAAGATG	eStops	YML069W	POB3	0	-0.736227	-2.31991	-1.14851
TTATCAATCTCAACCTCAAC	eStops	YIR006C	PAN1	0	-0.942629	-1.75187	-1.14698
TTACAGCAACTATTAACTCC	eStops	YGL172W	NUP49	0	-0.521673	-0.905572	-1.14653
CATATTCAAATGCTTTCTAT	eStops	YDR160W	SSY1	0	-0.0827177	-0.239277	-1.14627
ATTTCAACATAGTCAACAAG	eStops	YLL003W	SFI1	0	-1.55027	-1.71764	-1.14623
AGGCCAAAGAGATGACGCGC	eStops	YDL111C	RRP42	0	-0.312801	-2.38004	-1.14496
GCGCAGAAAAATATGTCAAA	eStops	YOR048C	RAT1	0	-0.117793	0.356413	-1.14273
TGCCAAACCATCTGATGAAC	eStops	YPL204W	HRR25	0	-0.00571623	-0.461539	-1.14258
TGACCGAATGGAAATAGATG	eStops	YHR036W	BRL1	0	-0.645815	-1.59325	-1.1425
CACTCAAGCAGGTACAGAAA	eStops	YBR070C	ALG14	0	-0.49751	-1.69966	-1.14172
CGTCCAGTTATCCTTAATTT	eStops	YMR270C	RRN9	0	0.240588	-0.975789	-1.14108
AGTCGACTTAAAGGGAATGT	eStops	YKL059C	MPE1	0	-1.6007	-2.37032	-1.13991
ACACCAATCAACCAATTGGA	eStops	YML085C	TUB1	0	-0.726006	-2.32098	-1.13983
AGTGGGTCAAAGCTCTTTGG	eStops	YDR238C	SEC26	0	-2.2093	-2.24473	-1.13936
TGGATTTCAGTATAACAGCG	eStops	YDL141W	BPL1	0	-0.171816	-0.990146	-1.13898
ATTCAAGAGGAACTGATCAG	eStops	YOL069W	NUF2	0	-1.4546	-2.31246	-1.13868
TGCACAACTATCTATGCAAG	eStops	YHR196W	UTP9	0	-0.369701	-0.923898	-1.13862
CAGAACAACAACAGACCGTA	eStops	YFR003C	YPI1	0	-0.0513213	-0.267242	-1.13729
AAATCTCAGGCGGAACCTTC	eStops	YJL076W	NET1	0	-0.0384949	-0.454254	-1.13714
ATTTACAAAGCGCCTTGCTC	eStops	YER038C	KRE29	0	-0.641993	-0.359514	-1.13671
AATTGATTTAAAGTACAACT	Ctr2	NA	NA	0	-0.349976	-0.316656	-1.1365
GATAAACGACACAAAACTAA	eStops	YHR186C	KOG1	0	-0.219502	-0.439332	-1.13589
ATTCAAGAAGGTACATTGGG	eStops	YGR211W	ZPR1	0	-0.878276	-2.95177	-1.13584
ATCTACAACCTATTGGTTCT	eStops	YNL061W	NOP2	0	-0.438687	-0.838835	-1.1357
TTCCAAGAAACCAACTCAAC	eStops	YNL261W	ORC5	0	-1.48414	-2.01142	-1.13557
ACATTTCCAGGTCCATTACG	eStops	YML125C	PGA3	0	-0.718253	-1.22832	-1.13518
TAATCAGAAATCTAAGGATA	eStops	YOR326W	MYO2	0	-0.0367539	-2.38603	-1.13496
AGTAACCAACAAAGTAGTAC	eStops	YGR119C	NUP57	0	-0.70867	-1.21482	-1.13407
TCTCAAAGTAACAGAACTGT	Ctr3	YNL126W	SPC98	0	-0.817283	-0.655457	-1.13389
GGTATTCAAGTTGCTTCTCA	eStops	YGL098W	USE1	0	-0.945145	-2.05492	-1.13322
GATCAAAATGAGGGTGGTTC	eStops	YHR188C	GPI16	0	-1.11337	-2.34834	-1.13139
GCTACAAGGTATCCTACCAA	eStops	YJR046W	TAH11	0	-0.9365	-1.52082	-1.13125
GTTTCCCAATTAGTTAGTCC	eStops	YMR211W	DML1	0	-0.304467	-1.0012	-1.13065
TCCATACAACCCCAAGGAAC	eStops	YIR006C	PAN1	0	-0.359887	-0.919189	-1.13023
GATATGACCATAGGGTACCG	eStops	YDR472W	TRS31	0	-0.408213	-0.98374	-1.12996
TTACAACATATGAAAATATA	eStops	YCL004W	PGS1	0	0.127195	-0.123607	-1.12969
AACACCAGTTTCCACGAGCT	eStops	YDL195W	SEC31	0	-2.11547	-1.69033	-1.12836
AGAACAAAGTGCGGTCACCC	eStops	YMR117C	SPC24	0	-1.42552	-1.70726	-1.12808
CATGACCAATCGTTAAATAA	eStops	YPR055W	SEC8	0	-0.649813	-0.822887	-1.12716
TACCACATACTCAATAATTC	eStops	YDL126C	CDC48	0	-0.00958912	0.063958	-1.12511
AAACAAGGGAGCGTCACTGT	eStops	YMR314W	PRE5	0	-0.797449	-1.5123	-1.12483
AGGTTACCAAACGAACATTA	eStops	YGR267C	FOL2	0	-0.0603438	-0.335492	-1.12483
AACACAACAAAAACGCTCCT	eStops	YFL008W	SMC1	0	-0.410121	-0.839355	-1.12477
[truncated: 4,921 more rows]
