# Supplementary material for: Genome-wide base editor screen identifies regulators of protein abundance in yeast
Source: bioRxiv preprint, doi:10.1101/2022.03.09.483657, version 1 (2022-03-09)
Supplement: Supplemental Table 4 [file 483657_file06.xlsx]

## Sheet: gRNAs
guide	PAMstrand	chr	chr.start	chr.end	mut1	mut2	mut3	provean	maxAbsProvean	essential	set	geneSys	gene	geneDescr	Eno2_log2fc	Fas1_log2fc	Fas2_log2fc	Htb2_log2fc	Rnr2_log2fc	Rpl9A_log2fc	Ssa1_log2fc	Tdh1_log2fc	Tdh2_log2fc	Tdh3_log2fc	Yhb1_log2fc	Eno2_q	Fas1_q	Fas2_q	Htb2_q	Rnr2_q	Rpl9A_q	Ssa1_q	Tdh1_q	Tdh2_q	Tdh3_q	Yhb1_q	FDR0.05_count
ACGGCACGGCGAGTAAGAAT	-	chrI	148711	148733	A783V	R784W	NA	c(0.804, -5.808)	5.808	TRUE	eProvs	YAL001C	TFC3	Subunit of RNA polymerase III transcription initiation factor complex; part of the TauB domain of TFIIIC that binds DNA at the BoxB promoter sites of tRNA and similar genes; cooperates with Tfc6p in DNA binding; largest of six subunits of the RNA polymerase III transcription initiation factor complex (TFIIIC)	0.636762	0.0193156	-0.00354078	0.381246	0.0287921	-0.0836196	0.024388	0.177941	-0.282353	-0.392814	-0.1276	0.277646	0.980103	0.998814	0.571296	0.9137	0.825351	0.999797	0.853676	0.895732	0.864177	0.916954	0
ATTAACGGGATACACAAAAA	-	chrI	150770	150792	T97M	NA	NA	-5.715	5.715	TRUE	eProvs	YAL001C	TFC3	Subunit of RNA polymerase III transcription initiation factor complex; part of the TauB domain of TFIIIC that binds DNA at the BoxB promoter sites of tRNA and similar genes; cooperates with Tfc6p in DNA binding; largest of six subunits of the RNA polymerase III transcription initiation factor complex (TFIIIC)	0.518537	0.516013	-0.215113	0.0034658	0.00166385	0.514343	0.024697	0.368223	0.0407713	0.148473	-0.0522112	0.297686	0.556822	0.988601	0.898235	0.923365	0.323604	0.999797	0.75658	0.959205	0.901092	0.94001	0
CAAGATCCTAGAAGTGTGAC	-	chrI	150649	150671	P138F	NA	NA	-8.022	8.022	TRUE	eProvs	YAL001C	TFC3	Subunit of RNA polymerase III transcription initiation factor complex; part of the TauB domain of TFIIIC that binds DNA at the BoxB promoter sites of tRNA and similar genes; cooperates with Tfc6p in DNA binding; largest of six subunits of the RNA polymerase III transcription initiation factor complex (TFIIIC)	-0.480607	-0.399963	-0.191493	-0.280161	0.0212236	-0.210397	-0.318718	0.322588	0.0450702	-0.335123	-0.404813	0.309444	0.46412	0.986305	0.617855	0.9137	0.708706	0.85785	0.7827	0.959199	0.885443	0.601053	0
CAATACTATGGATTTGGCGC	-	chrI	150680	150702	T127I	NA	NA	-5.048	5.048	TRUE	eProvs	YAL001C	TFC3	Subunit of RNA polymerase III transcription initiation factor complex; part of the TauB domain of TFIIIC that binds DNA at the BoxB promoter sites of tRNA and similar genes; cooperates with Tfc6p in DNA binding; largest of six subunits of the RNA polymerase III transcription initiation factor complex (TFIIIC)	-0.818886	-0.331538	-0.428435	-0.0598046	-0.393497	0.0766901	-0.751994	-0.435878	-0.0635806	-0.378104	0.0561372	0.0381858	0.797367	0.982279	0.882396	0.72074	0.846391	0.14168	0.769843	0.958496	0.898865	0.940156	1
GACGGCACGGCGAGTAAGAA	-	chrI	148712	148734	A783V	R784W	NA	c(0.804, -5.808)	5.808	TRUE	eProvs	YAL001C	TFC3	Subunit of RNA polymerase III transcription initiation factor complex; part of the TauB domain of TFIIIC that binds DNA at the BoxB promoter sites of tRNA and similar genes; cooperates with Tfc6p in DNA binding; largest of six subunits of the RNA polymerase III transcription initiation factor complex (TFIIIC)	0.682848	-0.338533	-0.19299	0.46878	-0.649589	0.194663	-0.461073	0.287494	-0.314224	-0.0274295	0.087433	0.380802	0.880261	0.988601	0.554884	0.449028	0.709894	0.819557	0.829051	0.921009	0.903529	0.936086	0
CCCGCAGATTTCGCAGTCGT	-	chrI	147290	147312	C1201Y	NA	NA	-10.991	10.991	FALSE	neProvs	YAL002W	VPS8	Membrane-binding component of the CORVET complex; involved in endosomal vesicle tethering and fusion in the endosome to vacuole protein targeting pathway; interacts with Vps21p; contains RING finger motif	0.0292142	-0.0727099	0.0436525	0.0393379	-0.206908	0.0726046	-0.218679	-0.00354996	0.0681766	-0.0532389	-0.231593	0.933108	0.968562	0.995762	0.882396	0.863138	0.823779	0.893042	0.907462	0.951669	0.901092	0.766256	0
CCCTCCATAAGCACCCAGGA	-	chrI	143942	143964	G85K	NA	NA	-7.898	7.898	FALSE	neProvs	YAL002W	VPS8	Membrane-binding component of the CORVET complex; involved in endosomal vesicle tethering and fusion in the endosome to vacuole protein targeting pathway; interacts with Vps21p; contains RING finger motif	-0.195005	-0.270372	-0.34415	-0.0483653	0.114723	-0.187454	-0.452817	-0.116969	-0.206431	0.119009	0.236366	0.877896	0.88815	0.951919	0.882396	0.899374	0.734967	0.624933	0.880358	0.924393	0.901092	0.850156	0
TATATTTCCGGTCTCGTATG	-	chrI	144155	144177	G155E	NA	NA	-7.378	7.378	FALSE	neProvs	YAL002W	VPS8	Membrane-binding component of the CORVET complex; involved in endosomal vesicle tethering and fusion in the endosome to vacuole protein targeting pathway; interacts with Vps21p; contains RING finger motif	0.242021	0.0576253	0.191569	-0.385552	-0.0113939	0.0611283	0.328296	-0.589631	0.55339	0.280446	-0.15604	0.881037	0.971991	0.988601	0.731168	0.921298	0.851928	0.912288	0.744016	0.780084	0.901092	0.921782	0
CTTACCCAGAATTCTCCAGA	+	chrI	142670	142692	P46L	NA	NA	-9.783	9.783	TRUE	eProvs	YAL003W	EFB1	Translation elongation factor 1 beta; stimulates nucleotide exchange to regenerate EF-1 alpha-GTP for the next elongation cycle; part of the EF-1 complex, which facilitates binding of aminoacyl-tRNA to the ribosomal A site; human homolog EEF1B2 can complement yeast efb1 mutants	0.0873063	-0.0431673	-0.0394941	0.102382	-0.0633017	0.061657	0.00382056	-0.122429	0.332126	0.166364	0.093614	0.910853	0.971991	0.995762	0.819151	0.899374	0.819427	0.999797	0.850073	0.624508	0.901092	0.921782	0
GTTCAACCACATCGCTTCCA	+	chrI	142692	142714	H54Y	NA	NA	-5.453	5.453	TRUE	eProvs	YAL003W	EFB1	Translation elongation factor 1 beta; stimulates nucleotide exchange to regenerate EF-1 alpha-GTP for the next elongation cycle; part of the EF-1 complex, which facilitates binding of aminoacyl-tRNA to the ribosomal A site; human homolog EEF1B2 can complement yeast efb1 mutants	0.0562102	0.0803947	-0.264817	-0.273703	0.0703182	0.336751	0.0633562	-0.102702	-0.261887	-0.268695	0.0649123	0.93135	0.971991	0.983555	0.686274	0.899374	0.527996	0.997608	0.878505	0.90261	0.899577	0.936086	0
TCACTCTAGATGTCAAGCCA	+	chrI	142907	142929	T124I	NA	NA	-5.917	5.917	TRUE	eProvs	YAL003W	EFB1	Translation elongation factor 1 beta; stimulates nucleotide exchange to regenerate EF-1 alpha-GTP for the next elongation cycle; part of the EF-1 complex, which facilitates binding of aminoacyl-tRNA to the ribosomal A site; human homolog EEF1B2 can complement yeast efb1 mutants	0.101841	0.0515472	-0.0259296	-0.113076	-0.0415283	-0.0275183	-0.0452356	-6.5657e-05	-0.0159407	-0.0779976	0.130681	0.877896	0.967033	0.995762	0.778557	0.899374	0.851486	0.990602	0.908304	0.959677	0.901092	0.828775	0
TAACCAAGTCAACCTTGATT	+	chrI	137794	137816	W183*	NA	NA	NA	NA	FALSE	neStops	YAL007C	ERP2	Member of the p24 family involved in ER to Golgi transport; similar to Emp24p and Erv25p; role in misfolded protein quality control; forms a heterotrimeric complex with Erp1p, Emp24p, and Erv25p; localized to COPII-coated vesicles; ERP2 has a paralog, ERP4, that arose from the whole genome duplication	0.119767	-0.148433	-0.5362	0.0749909	-0.0983614	0.261684	-0.30257	-0.217906	0.452526	0.11677	-0.00582882	0.918539	0.9567	0.797954	0.872357	0.899374	0.63856	0.900267	0.843393	0.810034	0.901092	0.953669	0
CACAGCTCCGATCCTCGGTT	-	chrI	136470	136492	G211E	A212T	NA	c(-7.969, -3.051)	7.969	FALSE	neProvs	YAL009W	SPO7	Putative regulatory subunit of Nem1p-Spo7p phosphatase holoenzyme; regulates nuclear growth by controlling phospholipid biosynthesis, required for normal nuclear envelope morphology, premeiotic replication, and sporulation	0.17356	-0.0516541	0.0455718	-0.0275267	0.108379	0.0804325	0.0534042	-0.0861843	0.0391322	0.18052	0.0147454	0.837946	0.971991	0.995762	0.883965	0.898896	0.791464	0.990522	0.870778	0.957553	0.901092	0.952019	0
AATATCTGCCGGGACAGAGC	-	chrI	134327	134349	S441F	NA	NA	-5.638	5.638	FALSE	neProvs	YAL010C	MDM10	Subunit of both the ERMES and the SAM complex; component of ERMES complex which acts as a molecular tether between the mitochondria and the ER, necessary for efficient phospholipid exchange between organelles and for mitophagy; SAM/TOB complex component that functions in the assembly of outer membrane beta-barrel proteins; involved in mitochondrial inheritance and morphology; ERMES complex is oft…	-0.0172229	-0.259244	-0.334237	0.227725	-0.0898755	0.14002	0.294259	0.272645	-0.0124449	-0.180507	-0.0999642	0.939576	0.849811	0.91793	0.659775	0.899374	0.757911	0.819557	0.765392	0.961765	0.901092	0.921782	0
AGGCCCTTCGAAATAGTCGC	+	chrI	132400	132422	P69F	NA	NA	-10.473	10.473	FALSE	neProvs	YAL011W	SWC3	Protein of unknown function; component of the SWR1 complex, which exchanges histone variant H2AZ (Htz1p) for chromatin-bound histone H2A; required for formation of nuclear-associated array of smooth endoplasmic reticulum known as karmellae	-0.0208016	0.0130351	0.32242	0.053169	0.00329182	0.0194393	-0.353481	-0.179889	-0.0275445	0.112196	-0.0713132	0.93822	0.980103	0.888038	0.881411	0.923269	0.863301	0.770942	0.855324	0.959677	0.901092	0.933579	0
ATAATCAAGTGGTACCGAAA	+	chrI	133454	133476	Q421*	NA	NA	NA	NA	FALSE	neStops	YAL011W	SWC3	Protein of unknown function; component of the SWR1 complex, which exchanges histone variant H2AZ (Htz1p) for chromatin-bound histone H2A; required for formation of nuclear-associated array of smooth endoplasmic reticulum known as karmellae	-0.265877	-0.0918179	0.212616	0.462803	-0.175977	-0.0198423	0.363997	-0.187026	-0.0500749	0.0584106	0.0780084	0.825127	0.971991	0.988601	0.555269	0.899374	0.86597	0.855798	0.863071	0.958437	0.903529	0.936086	0
TTCCAACAGAAATACGTTCA	+	chrI	133528	133550	Q445*	Q446*	NA	c(NA, NA)	NA	FALSE	neStops	YAL011W	SWC3	Protein of unknown function; component of the SWR1 complex, which exchanges histone variant H2AZ (Htz1p) for chromatin-bound histone H2A; required for formation of nuclear-associated array of smooth endoplasmic reticulum known as karmellae	0.0526452	0.251417	0.204873	0.375145	0.0621919	-0.236727	0.0504156	0.0685941	0.0662198	0.277097	0.160857	0.933108	0.922423	0.988601	0.669635	0.899374	0.713567	0.999238	0.892341	0.957553	0.901092	0.898132	0
AACCAAGCATCGAAAGGAGA	-	chrI	131513	131535	A244T	W245*	NA	c(-0.437, NA)	0.437	FALSE	neStops	YAL012W	CYS3	Cystathionine gamma-lyase; catalyzes one of the two reactions involved in the transsulfuration pathway that yields cysteine from homocysteine with the intermediary formation of cystathionine; protein abundance increases in response to DNA replication stress	0.069154	0.0221238	0.0952723	-0.0624658	-0.183789	-0.307574	0.218679	-0.176107	0.251686	-0.392313	0.387694	0.93135	0.980103	0.995762	0.882396	0.899374	0.640157	0.951476	0.867273	0.925007	0.885443	0.682511	0
AGCACCACCCTTGATTCTGA	-	chrI	131727	131749	G315D	G316N	NA	c(-6.854, -5.982)	6.854	FALSE	neProvs	YAL012W	CYS3	Cystathionine gamma-lyase; catalyzes one of the two reactions involved in the transsulfuration pathway that yields cysteine from homocysteine with the intermediary formation of cystathionine; protein abundance increases in response to DNA replication stress	0.198362	-0.0367051	-0.149404	0.17421	-0.0438752	0.121729	0.302624	-0.0808294	0.050549	-0.1266	0.126236	0.825229	0.97286	0.988598	0.736437	0.899374	0.751685	0.77541	0.879376	0.957553	0.901092	0.898132	0
ATCTCCTTCAGAATCAAGGG	+	chrI	131723	131745	S310F	NA	NA	-5.982	5.982	FALSE	neProvs	YAL012W	CYS3	Cystathionine gamma-lyase; catalyzes one of the two reactions involved in the transsulfuration pathway that yields cysteine from homocysteine with the intermediary formation of cystathionine; protein abundance increases in response to DNA replication stress	-0.558428	-0.538386	-0.167355	0.0905519	0.245069	-0.28634	-0.623823	0.0120298	-0.603472	-1.15407	0.695686	0.582741	0.795041	0.989055	0.865382	0.875057	0.712573	0.704908	0.906816	0.631633	0.04843	0.187609	1
GACCCACGGTGGTATCCCAA	+	chrI	131845	131867	H351Y	NA	NA	-5.982	5.982	FALSE	neProvs	YAL012W	CYS3	Cystathionine gamma-lyase; catalyzes one of the two reactions involved in the transsulfuration pathway that yields cysteine from homocysteine with the intermediary formation of cystathionine; protein abundance increases in response to DNA replication stress	-0.239273	-0.739948	-0.0757394	-0.118751	-0.199471	-0.39181	0.0529218	-0.251934	0.082054	-0.540175	0.30926	0.825229	0.218298	0.995762	0.836478	0.891921	0.455018	0.999238	0.819109	0.951669	0.3903	0.608853	0
GTCTCTATCGGTGATGTGTA	+	chrI	131090	131112	S99F	NA	NA	-5.883	5.883	FALSE	neProvs	YAL012W	CYS3	Cystathionine gamma-lyase; catalyzes one of the two reactions involved in the transsulfuration pathway that yields cysteine from homocysteine with the intermediary formation of cystathionine; protein abundance increases in response to DNA replication stress	-0.313246	-0.741396	-0.456711	-0.388932	0.0757031	-0.742189	-0.256668	0.276089	-0.189728	-0.283574	0.812821	0.726742	0.0138035	0.806398	0.490985	0.899374	0.0112664	0.890486	0.812215	0.925007	0.882132	0.000478595	3
GTTAGAGCAAGATTCCCACT	-	chrI	128497	128519	Q170*	NA	NA	NA	NA	FALSE	neStops	YAL014C	SYN8	Endosomal SNARE related to mammalian syntaxin 8	-0.144008	0.0735617	-0.00421933	-0.0596172	-0.155906	0.232427	0.0293757	-0.13282	0.164135	0.103227	0.145056	0.882645	0.970536	0.9985	0.868641	0.896146	0.576537	0.999238	0.862025	0.924174	0.901092	0.898132	0
TTAACCCAGTCGATATCCAC	+	chrI	127945	127967	W51*	V52I	NA	c(NA, -0.218)	0.218	FALSE	neStops	YAL015C	NTG1	DNA N-glycosylase and apurinic/apyrimidinic (AP) lyase; involved in base excision repair; acts in both nucleus and mitochondrion; creates a double-strand break at mtDNA origins that stimulates replication in response to oxidative stress; required for maintaining mitochondrial genome integrity; NTG1 has a paralog, NTG2, that arose from the whole genome duplication	0.0254055	0.0635139	0.164563	0.0291212	-0.264726	-0.171994	0.216894	0.124843	-0.0401425	-0.690937	-0.13788	0.93822	0.971991	0.988601	0.892952	0.875057	0.748982	0.953661	0.882769	0.959205	0.3903	0.921782	0
AACTCTCCAATTCACGTCCT	-	chrI	126218	126240	W452*	R453K	NA	c(NA, -2.933)	2.933	FALSE	neStops	YAL016W	TPD3	Regulatory subunit A of the heterotrimeric PP2A complex; the heterotrimeric protein phosphatase 2A (PP2A) complex also contains regulatory subunit Cdc55p and either catalytic subunit Pph21p or Pph22p; required for cell morphogenesis and transcription by RNA polymerase III	0.670254	1.38135	0.154018	1.84057	0.289624	0.0998426	0.715702	0.742296	0.232944	0.76757	-0.451632	0.250849	0.00184441	0.990002	2.54177e-05	0.875057	0.831397	0.400092	0.65563	0.932425	0.105676	0.673555	2
TGATACTCCAATGGTGAAAA	+	chrI	125490	125512	T206I	P207S	NA	c(-3.783, -8)	8	FALSE	neProvs	YAL016W	TPD3	Regulatory subunit A of the heterotrimeric PP2A complex; the heterotrimeric protein phosphatase 2A (PP2A) complex also contains regulatory subunit Cdc55p and either catalytic subunit Pph21p or Pph22p; required for cell morphogenesis and transcription by RNA polymerase III	0.0397406	0.059754	0.178129	0.0992784	0.221178	0.0932245	0.0198266	0.0696006	-0.0683291	0.0225573	-0.33122	0.933108	0.971991	0.988081	0.844026	0.875057	0.821382	0.999797	0.886991	0.951669	0.903529	0.617156	0
TGCTGTGCAGAATTTGAGTA	+	chrI	125967	125989	Q366*	NA	NA	NA	NA	FALSE	neStops	YAL016W	TPD3	Regulatory subunit A of the heterotrimeric PP2A complex; the heterotrimeric protein phosphatase 2A (PP2A) complex also contains regulatory subunit Cdc55p and either catalytic subunit Pph21p or Pph22p; required for cell morphogenesis and transcription by RNA polymerase III	0.078167	0.0338402	0.088181	0.180136	0.349043	0.220757	-0.0844322	-0.0299374	0.0447979	0.0193611	-0.156775	0.921968	0.979114	0.995762	0.809075	0.807763	0.703962	0.996942	0.899491	0.959205	0.903529	0.921782	0
ACAAAACCCAAGTATGCTAC	+	chrI	120701	120723	P162S	NA	NA	-7.823	7.823	FALSE	neProvs	YAL017W	PSK1	PAS domain-containing serine/threonine protein kinase; coordinately regulates protein synthesis and carbohydrate metabolism and storage in response to a unknown metabolite that reflects nutritional status; PSK1 has a paralog, PSK2, that arose from the whole genome duplication	-0.0673218	-0.00341158	0.319061	-0.155378	0.171973	-0.315856	0.0981899	0.223888	0.0536018	0.00365925	0.0930697	0.919376	0.980348	0.937192	0.805117	0.891921	0.513998	0.983717	0.831107	0.957553	0.914617	0.923471	0
AGGGCCAACCACAGGATATT	+	chrI	124066	124088	Q1283*	NA	NA	NA	NA	FALSE	neStops	YAL017W	PSK1	PAS domain-containing serine/threonine protein kinase; coordinately regulates protein synthesis and carbohydrate metabolism and storage in response to a unknown metabolite that reflects nutritional status; PSK1 has a paralog, PSK2, that arose from the whole genome duplication	0.389987	-0.198107	-0.0586392	0.268896	0.390527	0.0214723	-0.189261	-0.485512	0.202365	-0.162821	0.159639	0.717771	0.936122	0.995762	0.708497	0.699289	0.864447	0.942524	0.71651	0.924709	0.901092	0.898132	0
CTCTAACCCATGTATCTACA	-	chrI	123620	123642	W1137*	V1138I	NA	c(NA, -0.999)	0.999	FALSE	neStops	YAL017W	PSK1	PAS domain-containing serine/threonine protein kinase; coordinately regulates protein synthesis and carbohydrate metabolism and storage in response to a unknown metabolite that reflects nutritional status; PSK1 has a paralog, PSK2, that arose from the whole genome duplication	0.0842971	-0.0954687	-0.437172	0.162194	-0.0843257	0.343246	-0.0611454	-0.273947	-0.164392	-0.178782	0.118874	0.918539	0.9567	0.797954	0.799114	0.899374	0.4968	0.996942	0.802993	0.928291	0.901092	0.920051	0
GATTCACAGTTTACCTTACC	+	chrI	122447	122469	H743Y	NA	NA	-5.749	5.749	FALSE	neProvs	YAL017W	PSK1	PAS domain-containing serine/threonine protein kinase; coordinately regulates protein synthesis and carbohydrate metabolism and storage in response to a unknown metabolite that reflects nutritional status; PSK1 has a paralog, PSK2, that arose from the whole genome duplication	-0.12813	0.0725171	0.0667141	0.105718	-0.214624	-0.0809666	0.073206	-0.240953	0.085418	-0.145162	0.139942	0.895646	0.971596	0.991672	0.834241	0.867761	0.817264	0.987516	0.7827	0.945199	0.901092	0.882742	0
GCTGCCCCTGAAGTCTTAGG	+	chrI	124032	124054	A1271V	P1272F	NA	c(-3.96, -10.981)	10.981	FALSE	neProvs	YAL017W	PSK1	PAS domain-containing serine/threonine protein kinase; coordinately regulates protein synthesis and carbohydrate metabolism and storage in response to a unknown metabolite that reflects nutritional status; PSK1 has a paralog, PSK2, that arose from the whole genome duplication	0.0812149	-0.744098	0.0103577	0.193201	-0.337964	0.212357	-0.499936	-0.395673	-0.236151	0.179412	-0.10623	0.921485	0.256218	0.9985	0.818013	0.856365	0.761773	0.811508	0.795962	0.930809	0.901092	0.93325	0
GCTGGCCAATATGCCTCATT	-	chrI	118742	118764	Q262*	NA	NA	NA	NA	FALSE	neStops	YAL018C	LDS1	Protein Involved in spore wall assembly; localizes to lipid droplets found on or outside of the prospore membrane; shares similarity with Lds2p and Rrt8p, and a strain mutant for all 3 genes exhibits reduced dityrosine fluorescence relative to the single mutants	-0.124146	0.0649474	0.0664683	0.00131757	-0.0977887	-0.0119352	0.0806571	0.263801	-0.204488	0.0113494	-0.345361	0.907801	0.971991	0.995762	0.901097	0.899374	0.866269	0.994747	0.79926	0.921143	0.905607	0.637328	0
ACCACGTATAACTTGGCTGC	+	chrI	116947	116969	T678M	NA	NA	-6	6	FALSE	neProvs	YAL019W	FUN30	Snf2p family member with ATP-dependent chromatin remodeling activity; has a role in silencing at the mating type locus, telomeres and centromeres; enriched at centromeres and is required for correct chromatin structure around centromeres, as well as at the boundary element of the silent HMR; recruited to DNA double-strand breaks (DSBs) where it promotes 5' strand resection of DSBs; potential Cdc2…	-0.0419058	0.75882	0.727222	0.0505654	-0.0783317	-0.211162	-0.0292846	0.245534	0.114705	0.102351	-0.177715	0.934776	0.242983	0.599977	0.882585	0.899374	0.717088	0.999797	0.849158	0.944549	0.901092	0.898132	0
CATCATCGACGCTAGAAAAT	+	chrI	116801	116823	S629L	S630L	NA	c(-5.862, -5.995)	5.995	FALSE	neProvs	YAL019W	FUN30	Snf2p family member with ATP-dependent chromatin remodeling activity; has a role in silencing at the mating type locus, telomeres and centromeres; enriched at centromeres and is required for correct chromatin structure around centromeres, as well as at the boundary element of the silent HMR; recruited to DNA double-strand breaks (DSBs) where it promotes 5' strand resection of DSBs; potential Cdc2…	0.0498401	-0.0057736	-0.0177071	-0.0270264	0.0479927	0.0887538	-0.253436	-0.233923	0.338317	0.287031	0.333487	0.925336	0.980348	0.9985	0.88574	0.899374	0.807158	0.827749	0.796658	0.6797	0.864177	0.461625	0
CTAGACCCATGTCGTCTGCA	-	chrI	116700	116722	M599I	G600N	NA	c(-3.993, -5.99)	5.99	FALSE	neProvs	YAL019W	FUN30	Snf2p family member with ATP-dependent chromatin remodeling activity; has a role in silencing at the mating type locus, telomeres and centromeres; enriched at centromeres and is required for correct chromatin structure around centromeres, as well as at the boundary element of the silent HMR; recruited to DNA double-strand breaks (DSBs) where it promotes 5' strand resection of DSBs; potential Cdc2…	0.209994	-0.0650447	-0.0370584	-0.410161	0.111735	-0.357999	-0.0369472	-0.0389457	0.194842	-0.0241928	0.12126	0.825127	0.968562	0.995866	0.325594	0.899374	0.323314	0.999238	0.89283	0.920129	0.903529	0.898523	0
GCGTACCAGTTAATAAAAGG	-	chrI	117096	117118	G732N	NA	NA	-6	6	FALSE	neProvs	YAL019W	FUN30	Snf2p family member with ATP-dependent chromatin remodeling activity; has a role in silencing at the mating type locus, telomeres and centromeres; enriched at centromeres and is required for correct chromatin structure around centromeres, as well as at the boundary element of the silent HMR; recruited to DNA double-strand breaks (DSBs) where it promotes 5' strand resection of DSBs; potential Cdc2…	-0.282736	-0.352143	0.153796	-0.663277	0.0575961	-0.558771	-0.402833	-0.742241	0.198932	-0.0213688	0.314863	0.850929	0.85085	0.988601	0.359289	0.899374	0.275506	0.829604	0.45489	0.932346	0.903529	0.683509	0
TGACAGACAAGCTGCTGATA	+	chrI	118071	118093	Q1054*	NA	NA	NA	NA	FALSE	neStops	YAL019W	FUN30	Snf2p family member with ATP-dependent chromatin remodeling activity; has a role in silencing at the mating type locus, telomeres and centromeres; enriched at centromeres and is required for correct chromatin structure around centromeres, as well as at the boundary element of the silent HMR; recruited to DNA double-strand breaks (DSBs) where it promotes 5' strand resection of DSBs; potential Cdc2…	-0.0990048	0.138294	0.0682263	-0.128171	0.111232	0.0287787	0.0564715	0.152718	-0.192417	0.134804	-0.0125346	0.91592	0.9567	0.995762	0.834613	0.899374	0.861242	0.999238	0.863129	0.924174	0.901092	0.952259	0
TGAGGCAGCAAAGACAAAAT	+	chrI	115250	115272	Q113*	NA	NA	NA	NA	FALSE	neStops	YAL019W	FUN30	Snf2p family member with ATP-dependent chromatin remodeling activity; has a role in silencing at the mating type locus, telomeres and centromeres; enriched at centromeres and is required for correct chromatin structure around centromeres, as well as at the boundary element of the silent HMR; recruited to DNA double-strand breaks (DSBs) where it promotes 5' strand resection of DSBs; potential Cdc2…	0.10964	0.226153	0.102465	-0.0125428	-0.104854	-0.0170414	0.0252632	-0.0480252	-0.183182	-0.170917	0.210434	0.9091	0.920742	0.990002	0.892952	0.899374	0.86597	0.999797	0.892371	0.922535	0.901092	0.826198	0
CAGATCCAAAGCGCAAGTGA	-	chrI	114652	114674	W140*	NA	NA	NA	NA	FALSE	neStops	YAL019W-A	YAL019W-A	Dubious open reading frame; unlikely to encode a functional protein, based on available experimental and comparative sequence data; partially overlaps ORF ATS1/YAL020C	0.300511	0.0793136	0.0135014	-0.0880176	-0.086069	0.240159	-0.252261	-0.242498	0.283682	0.180762	0.000832986	0.758946	0.968218	0.9985	0.851342	0.899374	0.62956	0.920019	0.804604	0.860912	0.901092	0.954369	0
AGGCACCCGAGTATACGGCT	-	chrI	114159	114181	T147I	R148*	NA	c(-2.604, NA)	2.604	FALSE	neStops	YAL020C	ATS1	Protein required for modification of wobble nucleosides in tRNA; acts with Elongator complex, Kti11p, and Kti12p; has a potential role in regulatory interactions between microtubules and the cell cycle; forms a stable heterodimer with Kti11p	0.0401972	-0.239984	0.226677	-0.0842397	-0.00592509	-0.00315887	-0.40317	0.282242	-0.414422	0.204791	0.112914	0.933108	0.907928	0.983555	0.86693	0.922637	0.872628	0.678161	0.827865	0.757453	0.901092	0.921782	0
CCGCAAAAGGGCTCCCAGCC	-	chrI	113690	113712	Q303*	NA	NA	NA	NA	FALSE	neStops	YAL020C	ATS1	Protein required for modification of wobble nucleosides in tRNA; acts with Elongator complex, Kti11p, and Kti12p; has a potential role in regulatory interactions between microtubules and the cell cycle; forms a stable heterodimer with Kti11p	-0.20663	0.160418	-0.21517	-0.0908779	-0.141661	0.224671	0.424743	-0.237101	-0.108041	0.14579	-0.0490155	0.87477	0.939749	0.988598	0.853118	0.899374	0.700866	0.756777	0.834994	0.943604	0.901092	0.940685	0
TGCTGCCCCAGCCGTATACT	+	chrI	114153	114175	W152*	G153N	NA	c(NA, -5.975)	5.975	FALSE	neStops	YAL020C	ATS1	Protein required for modification of wobble nucleosides in tRNA; acts with Elongator complex, Kti11p, and Kti12p; has a potential role in regulatory interactions between microtubules and the cell cycle; forms a stable heterodimer with Kti11p	0.073536	-0.105152	0.272293	-0.0963249	0.104488	0.222385	-0.206065	0.250871	0.042454	0.264022	0.374252	0.9186	0.967033	0.983555	0.851622	0.899374	0.669046	0.953661	0.82496	0.959205	0.901092	0.648046	0
ACCGTCGTGGGCGTTAAGTT	-	chrI	111760	111782	S528L	NA	NA	-5.197	5.197	FALSE	neProvs	YAL021C	CCR4	Component of the CCR4-NOT transcriptional complex; CCR4-NOT is involved in regulation of gene expression; component of the major cytoplasmic deadenylase, which is involved in mRNA poly(A) tail shortening	0.187309	0.0335651	0.30887	0.394822	-0.0407989	-0.275403	0.437267	-0.0694846	-0.23614	0.105108	-0.452291	0.877896	0.978346	0.942378	0.464512	0.9137	0.610965	0.627229	0.890448	0.906685	0.901092	0.431188	0
ACGCCCACGACGGTGTGTAA	+	chrI	111769	111791	W529*	A530T	NA	c(NA, -3.531)	3.531	FALSE	neStops	YAL021C	CCR4	Component of the CCR4-NOT transcriptional complex; CCR4-NOT is involved in regulation of gene expression; component of the major cytoplasmic deadenylase, which is involved in mRNA poly(A) tail shortening	NA	NA	NA	NA	NA	-0.203429	-0.0580826	1.81996	NA	NA	NA	NA	NA	NA	NA	NA	0.821382	0.999238	0.0623694	NA	NA	NA	0
AGCAGCAACAGCAGCATGCC	-	chrI	113279	113301	Q22*	NA	NA	NA	NA	FALSE	neStops	YAL021C	CCR4	Component of the CCR4-NOT transcriptional complex; CCR4-NOT is involved in regulation of gene expression; component of the major cytoplasmic deadenylase, which is involved in mRNA poly(A) tail shortening	-0.189506	0.00926082	0.123237	-0.365355	-0.832216	0.18365	0.0402729	0.377985	-0.315454	0.00771897	0.345704	0.902273	0.980348	0.990002	0.581273	0.0536514	0.745307	0.999238	0.75658	0.880365	0.909513	0.678864	0
AGGACTCCAAGAAAGTGGAC	-	chrI	111566	111588	S593F	NA	NA	-5.09	5.09	FALSE	neProvs	YAL021C	CCR4	Component of the CCR4-NOT transcriptional complex; CCR4-NOT is involved in regulation of gene expression; component of the major cytoplasmic deadenylase, which is involved in mRNA poly(A) tail shortening	-0.0633778	-0.284956	-0.099903	-0.00163329	-0.136208	-0.261372	-0.121638	-0.280333	-0.0224168	0.180026	0.223252	0.918585	0.790172	0.990002	0.899956	0.897754	0.497615	0.975412	0.769843	0.959677	0.901092	0.794538	0
CAAATACATCAAGAGGGAAA	-	chrI	111144	111166	H734Y	NA	NA	-5.993	5.993	FALSE	neProvs	YAL021C	CCR4	Component of the CCR4-NOT transcriptional complex; CCR4-NOT is involved in regulation of gene expression; component of the major cytoplasmic deadenylase, which is involved in mRNA poly(A) tail shortening	0.163487	-0.303212	-0.15373	-0.0164968	-0.368554	-0.073625	-0.261808	-0.210396	0.081667	-0.212447	-0.0512888	0.877896	0.886252	0.988601	0.892952	0.735757	0.829294	0.913418	0.828335	0.949708	0.901092	0.94001	0
GCCCATATGGTGTCGCCACT	+	chrI	111378	111400	W660*	NA	NA	NA	NA	FALSE	neStops	YAL021C	CCR4	Component of the CCR4-NOT transcriptional complex; CCR4-NOT is involved in regulation of gene expression; component of the major cytoplasmic deadenylase, which is involved in mRNA poly(A) tail shortening	0.169615	-0.0662715	0.297954	0.364506	-0.0958974	-0.149141	0.0313626	0.00458975	-0.440024	0.0632065	0.477809	0.877896	0.971991	0.981084	0.461358	0.899374	0.755627	0.999238	0.907462	0.625842	0.901092	0.293462	0
TAACCGTGCTTGTCCAATAG	+	chrI	111636	111658	G574N	NA	NA	-5.063	5.063	FALSE	neProvs	YAL021C	CCR4	Component of the CCR4-NOT transcriptional complex; CCR4-NOT is involved in regulation of gene expression; component of the major cytoplasmic deadenylase, which is involved in mRNA poly(A) tail shortening	-0.132963	-0.155055	0.0646273	0.154483	-0.23401	0.367814	0.22392	-0.114461	0.139037	0.110165	0.194174	0.881037	0.925329	0.995054	0.771086	0.817622	0.185659	0.887633	0.862524	0.925007	0.901092	0.791755	0
CATGACACAGAATGGTATCA	-	chrI	109833	109855	T194I	Q195*	NA	c(-3.933, NA)	3.933	FALSE	neStops	YAL022C	FUN26	High affinity, broad selectivity, nucleoside/nucleobase transporter; vacuolar membrane localized transporter which may regulate the balance of nicotinamide riboside (NmR) levels between the cytosol and vacuole, contributing to salvage of NmR for use in cytosolic NAD+ synthesis; equilibrative nucleoside transporter (ENT) family member	NA	NA	NA	NA	-0.740651	NA	NA	NA	NA	NA	0.565996	NA	NA	NA	NA	0.693727	NA	NA	NA	NA	NA	0.821065	0
GCCCGTTGGTTACGCCGAAA	+	chrI	109041	109063	G463R	NA	NA	-7.733	7.733	FALSE	neProvs	YAL022C	FUN26	High affinity, broad selectivity, nucleoside/nucleobase transporter; vacuolar membrane localized transporter which may regulate the balance of nicotinamide riboside (NmR) levels between the cytosol and vacuole, contributing to salvage of NmR for use in cytosolic NAD+ synthesis; equilibrative nucleoside transporter (ENT) family member	-0.0606853	0.509603	0.0443296	0.129477	-0.0368692	0.285885	0.572367	-0.0615051	-0.417055	0.265053	0.041418	0.928897	0.785328	0.9985	0.842875	0.9137	0.636281	0.768397	0.892341	0.848111	0.901092	0.948915	0
TACAGTCAAGGTGTCATGGT	-	chrI	109784	109806	Q211*	NA	NA	NA	NA	FALSE	neStops	YAL022C	FUN26	High affinity, broad selectivity, nucleoside/nucleobase transporter; vacuolar membrane localized transporter which may regulate the balance of nicotinamide riboside (NmR) levels between the cytosol and vacuole, contributing to salvage of NmR for use in cytosolic NAD+ synthesis; equilibrative nucleoside transporter (ENT) family member	-0.0233627	0.0482147	0.0506311	0.279181	-0.0533675	0.11586	0.213456	0.0468762	0.0753382	0.252428	0.195479	0.937037	0.971991	0.995762	0.571296	0.899374	0.790306	0.90785	0.892341	0.94883	0.901092	0.84885	0
AAGACACAATGGGAGGTTTC	-	chrI	107218	107240	T439I	Q440*	NA	c(-3.569, NA)	3.569	FALSE	neStops	YAL023C	PMT2	Protein O-mannosyltransferase of the ER membrane; transfers mannose residues from dolichyl phosphate-D-mannose to protein serine/threonine residues; involved in ER quality control; acts in a complex with Pmt1p, can instead interact with Pmt5p; antifungal drug target; PMT2 has a paralog, PMT3, that arose from the whole genome duplication	-0.112659	0.051552	0.377802	-0.102084	0.0278517	-0.0323038	0.654355	-0.836399	-0.0164061	-0.224262	-0.198705	0.918539	0.978254	0.983555	0.865382	0.9137	0.863301	0.814146	0.428755	0.962502	0.901092	0.912094	0
CTCAAACCCACATTCAAAGT	+	chrI	106780	106802	G589N	NA	NA	-5.993	5.993	FALSE	neProvs	YAL023C	PMT2	Protein O-mannosyltransferase of the ER membrane; transfers mannose residues from dolichyl phosphate-D-mannose to protein serine/threonine residues; involved in ER quality control; acts in a complex with Pmt1p, can instead interact with Pmt5p; antifungal drug target; PMT2 has a paralog, PMT3, that arose from the whole genome duplication	-0.0647048	-0.318748	-0.0233423	-0.0167622	-0.0820623	-0.0347771	0.00983456	0.269099	0.00736228	0.00559747	-0.233565	0.918539	0.685837	0.998474	0.892952	0.899374	0.851106	0.999797	0.726342	0.962502	0.908468	0.722643	0
CTGTACCAGAATGCGATAAT	+	chrI	107600	107622	G316N	NA	NA	-5.985	5.985	FALSE	neProvs	YAL023C	PMT2	Protein O-mannosyltransferase of the ER membrane; transfers mannose residues from dolichyl phosphate-D-mannose to protein serine/threonine residues; involved in ER quality control; acts in a complex with Pmt1p, can instead interact with Pmt5p; antifungal drug target; PMT2 has a paralog, PMT3, that arose from the whole genome duplication	-0.0258662	0.173566	0.221258	0.0638805	-0.0065878	0.183263	-0.0454382	-0.415667	-0.0141899	0.0555958	-0.183541	0.933108	0.919051	0.98146	0.859158	0.921298	0.672326	0.999238	0.539324	0.961753	0.901092	0.788743	0
GTGGGTTCTGACGTCGGACA	-	chrI	107539	107561	S333F	NA	NA	-5.488	5.488	FALSE	neProvs	YAL023C	PMT2	Protein O-mannosyltransferase of the ER membrane; transfers mannose residues from dolichyl phosphate-D-mannose to protein serine/threonine residues; involved in ER quality control; acts in a complex with Pmt1p, can instead interact with Pmt5p; antifungal drug target; PMT2 has a paralog, PMT3, that arose from the whole genome duplication	0.0631917	0.190341	0.208727	-0.0105845	-0.175979	-0.385827	0.0146627	-0.0300863	-0.0347321	0.604559	0.331375	0.929824	0.937289	0.988598	0.893051	0.899374	0.580623	0.999797	0.902102	0.959677	0.787886	0.781325	0
TAGAAGCCCACGTGGAAGCT	+	chrI	106709	106731	W612*	A613T	NA	c(NA, 0.099)	0.099	FALSE	neStops	YAL023C	PMT2	Protein O-mannosyltransferase of the ER membrane; transfers mannose residues from dolichyl phosphate-D-mannose to protein serine/threonine residues; involved in ER quality control; acts in a complex with Pmt1p, can instead interact with Pmt5p; antifungal drug target; PMT2 has a paralog, PMT3, that arose from the whole genome duplication	0.0929061	0.30855	0.110491	-0.0135866	-0.0323796	0.0243283	-0.112882	-0.250334	0.0548223	0.236891	0.0723197	0.918539	0.85085	0.990002	0.892952	0.9137	0.86394	0.987081	0.835354	0.959205	0.901092	0.936086	0
TAGCTTCCTCAGCATGGCAA	-	chrI	106803	106825	A577V	S578F	NA	c(-3.827, -5.993)	5.993	FALSE	neProvs	YAL023C	PMT2	Protein O-mannosyltransferase of the ER membrane; transfers mannose residues from dolichyl phosphate-D-mannose to protein serine/threonine residues; involved in ER quality control; acts in a complex with Pmt1p, can instead interact with Pmt5p; antifungal drug target; PMT2 has a paralog, PMT3, that arose from the whole genome duplication	0.048045	0.102497	-0.112069	0.372633	-0.0136192	-0.0439729	-0.0455581	0.36416	0.128319	0.330989	-0.0107393	0.925387	0.9567	0.988601	0.336394	0.9137	0.847256	0.999238	0.677359	0.932346	0.738359	0.952099	0
TCTATACTGTGATTGACTTA	-	chrI	107745	107767	T264I	NA	NA	-5.993	5.993	FALSE	neProvs	YAL023C	PMT2	Protein O-mannosyltransferase of the ER membrane; transfers mannose residues from dolichyl phosphate-D-mannose to protein serine/threonine residues; involved in ER quality control; acts in a complex with Pmt1p, can instead interact with Pmt5p; antifungal drug target; PMT2 has a paralog, PMT3, that arose from the whole genome duplication	0.186524	-0.382967	-0.0689609	0.0543881	-0.138562	0.421816	-0.0484503	-0.0665299	-0.00590966	-0.229536	-0.169755	0.851196	0.663897	0.995762	0.882396	0.898896	0.285777	0.999238	0.888215	0.962971	0.891001	0.87395	0
TGCCAACCAGTGGTTAATAT	+	chrI	107688	107710	W286*	NA	NA	NA	NA	FALSE	neStops	YAL023C	PMT2	Protein O-mannosyltransferase of the ER membrane; transfers mannose residues from dolichyl phosphate-D-mannose to protein serine/threonine residues; involved in ER quality control; acts in a complex with Pmt1p, can instead interact with Pmt5p; antifungal drug target; PMT2 has a paralog, PMT3, that arose from the whole genome duplication	0.104654	0.0697316	0.271089	0.30908	0.439366	0.0413139	-0.261883	0.175788	-0.302456	0.0701528	-0.33349	0.918539	0.971991	0.983555	0.589804	0.692523	0.85574	0.925101	0.863129	0.886188	0.901092	0.722408	0
CAAACAAGCAGTTGTAAGAC	-	chrI	103541	103563	Q772*	NA	NA	NA	NA	FALSE	neStops	YAL024C	LTE1	Protein similar to GDP/GTP exchange factors; without detectable GEF activity; required for asymmetric localization of Bfa1p at daughter-directed spindle pole bodies and for mitotic exit at low temperatures	0.0819556	-0.176092	-0.693905	0.534359	-0.368183	0.10762	0.464184	NA	-0.296432	0.0612952	0.355036	0.93135	0.957647	0.870274	0.620281	0.869472	0.83647	0.912288	NA	0.925007	0.903529	0.87395	0
CCACAGAGAGAATTTCCCAA	-	chrI	103267	103289	Q863*	NA	NA	NA	NA	FALSE	neStops	YAL024C	LTE1	Protein similar to GDP/GTP exchange factors; without detectable GEF activity; required for asymmetric localization of Bfa1p at daughter-directed spindle pole bodies and for mitotic exit at low temperatures	0.0174166	-0.0987709	-0.17264	0.104364	-0.0892055	0.0151057	0.0155286	-0.0689993	-0.254803	-0.144849	-0.167257	0.940823	0.968218	0.988598	0.850418	0.899374	0.86597	0.999797	0.890578	0.897594	0.901092	0.898132	0
CCAGATCAATCCGAGAAGGA	-	chrI	102454	102476	Q1135*	NA	NA	NA	NA	FALSE	neStops	YAL024C	LTE1	Protein similar to GDP/GTP exchange factors; without detectable GEF activity; required for asymmetric localization of Bfa1p at daughter-directed spindle pole bodies and for mitotic exit at low temperatures	NA	-0.477005	NA	NA	NA	-0.7464	NA	0.820347	NA	NA	NA	NA	0.925329	NA	NA	NA	0.53753	NA	0.765392	NA	NA	NA	0
ACTATCCAAAAATTACACGA	-	chrI	100881	100903	S83F	NA	NA	-5.444	5.444	TRUE	eProvs	YAL025C	MAK16	Essential nuclear protein; constituent of 66S pre-ribosomal particles; required for maturation of 25S and 5.8S rRNAs; required for maintenance of M1 satellite double-stranded RNA of the L-A virus	-0.488428	0.619077	0.0512609	0.247595	-0.743973	-0.82581	-1.28257	0.0780906	-1.02824	-0.371412	-0.723793	0.554679	0.221556	0.995762	0.7296	0.0600124	0.0109367	0.00025947	0.88281	0.000499178	0.855091	0.131361	3
CAACAGTGAAGTGTGACAAT	-	chrI	100972	100994	T52I	NA	NA	-5.814	5.814	TRUE	eProvs	YAL025C	MAK16	Essential nuclear protein; constituent of 66S pre-ribosomal particles; required for maturation of 25S and 5.8S rRNAs; required for maintenance of M1 satellite double-stranded RNA of the L-A virus	-0.0116016	-0.381239	-0.0610212	0.00209817	-0.207507	-0.293887	0.279943	0.197612	-0.205358	-0.0268971	-0.213246	0.940823	0.74336	0.995762	0.899832	0.875122	0.526975	0.856511	0.846141	0.911993	0.903529	0.838715	0
GAGACGTTTAGCATTAAGGG	-	chrI	100758	100780	R124C	NA	NA	-7.318	7.318	TRUE	eProvs	YAL025C	MAK16	Essential nuclear protein; constituent of 66S pre-ribosomal particles; required for maturation of 25S and 5.8S rRNAs; required for maintenance of M1 satellite double-stranded RNA of the L-A virus	-0.27665	0.0274681	0.141228	-0.531092	0.11607	0.272963	0.0874872	-0.525593	0.360644	0.291746	0.121117	0.825229	0.980103	0.989055	0.534793	0.899374	0.669046	0.995213	0.683732	0.84946	0.901092	0.933579	0
GCAACAGTGAAGTGTGACAA	-	chrI	100973	100995	T52I	NA	NA	-5.814	5.814	TRUE	eProvs	YAL025C	MAK16	Essential nuclear protein; constituent of 66S pre-ribosomal particles; required for maturation of 25S and 5.8S rRNAs; required for maintenance of M1 satellite double-stranded RNA of the L-A virus	-0.217469	-0.00206866	0.111178	-0.168268	-0.336501	-0.36045	-0.128603	-0.0226265	-0.289433	-0.0728634	-0.447263	0.877896	0.980591	0.994463	0.835544	0.84811	0.576734	0.983717	0.902169	0.895732	0.901092	0.420805	0
GCACACTCCTGCCAAGTTAT	-	chrI	100914	100936	T72I	P73S	NA	c(-2.463, -7.867)	7.867	TRUE	eProvs	YAL025C	MAK16	Essential nuclear protein; constituent of 66S pre-ribosomal particles; required for maturation of 25S and 5.8S rRNAs; required for maintenance of M1 satellite double-stranded RNA of the L-A virus	-0.406616	-0.0707218	-0.164717	-0.079377	-0.416184	-0.393156	-0.343155	-0.17544	-0.373052	-0.00435495	-0.310364	0.195028	0.970536	0.986305	0.852464	0.452178	0.327816	0.65688	0.83237	0.538984	0.912287	0.457428	0
AACCAAAATAAGAGGGAACC	+	chrI	96180	96202	W1172*	NA	NA	NA	NA	FALSE	neStops	YAL026C	DRS2	Trans-golgi network aminophospholipid translocase (flippase); maintains membrane lipid asymmetry in post-Golgi secretory vesicles; contributes to clathrin-coated vesicle formation, endocytosis, protein trafficking between the Golgi and endosomal system and the cellular response to mating pheromone; autoinhibited by its C-terminal tail; localizes to the trans-Golgi network; mutations in human homo…	NA	NA	0.28596	0.299694	NA	NA	NA	NA	NA	NA	NA	NA	NA	0.988601	0.835383	NA	NA	NA	NA	NA	NA	NA	0
ATTCCAGAATTTCAAAGCGA	-	chrI	97767	97789	P638L	NA	NA	-9.987	9.987	FALSE	neProvs	YAL026C	DRS2	Trans-golgi network aminophospholipid translocase (flippase); maintains membrane lipid asymmetry in post-Golgi secretory vesicles; contributes to clathrin-coated vesicle formation, endocytosis, protein trafficking between the Golgi and endosomal system and the cellular response to mating pheromone; autoinhibited by its C-terminal tail; localizes to the trans-Golgi network; mutations in human homo…	0.0938295	0.0260093	-0.187826	-0.0186809	0.0313272	-0.0985696	0.172074	0.0963755	-0.139225	0.181793	-0.361943	0.909144	0.978346	0.983555	0.892952	0.9137	0.794234	0.941251	0.874295	0.932425	0.901092	0.287657	0
ATTGAAACTGCCAACTTGGA	-	chrI	98676	98698	T336I	NA	NA	-5.887	5.887	FALSE	neProvs	YAL026C	DRS2	Trans-golgi network aminophospholipid translocase (flippase); maintains membrane lipid asymmetry in post-Golgi secretory vesicles; contributes to clathrin-coated vesicle formation, endocytosis, protein trafficking between the Golgi and endosomal system and the cellular response to mating pheromone; autoinhibited by its C-terminal tail; localizes to the trans-Golgi network; mutations in human homo…	0.346988	-0.0251823	0.220651	0.20938	-0.222163	-0.0968604	0.510482	0.344252	NA	0.162717	0.332412	0.851196	0.980103	0.988601	0.829233	0.899374	0.850768	0.855798	0.827631	NA	0.901092	0.87395	0
CAACTTTAAGAAATACTGCA	-	chrI	98462	98484	T406I	NA	NA	-5.117	5.117	FALSE	neProvs	YAL026C	DRS2	Trans-golgi network aminophospholipid translocase (flippase); maintains membrane lipid asymmetry in post-Golgi secretory vesicles; contributes to clathrin-coated vesicle formation, endocytosis, protein trafficking between the Golgi and endosomal system and the cellular response to mating pheromone; autoinhibited by its C-terminal tail; localizes to the trans-Golgi network; mutations in human homo…	-0.1564	0.0840084	0.149196	0.178451	-0.223655	-0.369078	0.122431	0.103431	-0.055787	-0.0531962	0.0609126	0.902273	0.971991	0.988601	0.7914	0.875057	0.40893	0.978961	0.878505	0.958403	0.903529	0.938025	0
GGATTGACCTGAAAAGGCAT	+	chrI	96581	96603	G1037D	NA	NA	-6.991	6.991	FALSE	neProvs	YAL026C	DRS2	Trans-golgi network aminophospholipid translocase (flippase); maintains membrane lipid asymmetry in post-Golgi secretory vesicles; contributes to clathrin-coated vesicle formation, endocytosis, protein trafficking between the Golgi and endosomal system and the cellular response to mating pheromone; autoinhibited by its C-terminal tail; localizes to the trans-Golgi network; mutations in human homo…	-0.0284468	-0.185025	0.195375	-0.0235736	0.109885	-0.120852	-0.320524	-0.29469	-0.47706	0.0129369	-0.0611064	0.934776	0.925329	0.986573	0.892952	0.899374	0.808571	0.814465	0.799818	0.666243	0.903908	0.936596	0
TACCCACAATTGTACAAATT	-	chrI	96450	96472	P1077L	Q1078*	NA	c(-9.987, NA)	9.987	FALSE	neStops	YAL026C	DRS2	Trans-golgi network aminophospholipid translocase (flippase); maintains membrane lipid asymmetry in post-Golgi secretory vesicles; contributes to clathrin-coated vesicle formation, endocytosis, protein trafficking between the Golgi and endosomal system and the cellular response to mating pheromone; autoinhibited by its C-terminal tail; localizes to the trans-Golgi network; mutations in human homo…	NA	NA	NA	-0.493131	0.267406	NA	0.317066	-0.0254668	NA	0.0486449	-0.00497398	NA	NA	NA	0.693282	0.899374	NA	0.941831	0.904386	NA	0.903529	0.953669	0
AAATGTACATATTTCAGTAA	+	chrI	95536	95558	C94Y	NA	NA	-11	11	FALSE	neProvs	YAL026C-A	YAL026C-A	Dubious open reading frame; unlikely to encode a functional protein, based on available experimental and comparative sequence data; partially overlaps the uncharacterized ORF YAL027W and the verified gene DRS2	-0.159462	-0.0972413	-0.210287	-0.0885193	0.201891	-0.156375	-0.125845	0.0623615	0.184549	0.0554479	0.0500581	0.871527	0.9567	0.983555	0.850263	0.874155	0.700875	0.968153	0.88542	0.924393	0.901092	0.94001	0
AGTCAAAAGAAACCAACCCT	-	chrI	90352	90374	Q634*	NA	NA	NA	NA	FALSE	neStops	YAL029C	MYO4	Type V myosin motor involved in actin-based transport of cargos; required for mRNA transport, including ASH1 mRNA, and facilitating the growth and movement of ER tubules into the growing bud along with She3p; MYO4 has a paralog, MYO2, that arose from the whole genome duplication	-0.131735	0.0808178	0.027819	0.293195	-0.131838	0.200659	-0.162017	-0.161368	0.104789	0.102895	0.245657	0.900426	0.965776	0.997475	0.534976	0.899374	0.606405	0.969132	0.849158	0.940889	0.901092	0.72136	0
GAATGCAGTTAGCTAGACGA	-	chrI	89517	89539	Q913*	NA	NA	NA	NA	FALSE	neStops	YAL029C	MYO4	Type V myosin motor involved in actin-based transport of cargos; required for mRNA transport, including ASH1 mRNA, and facilitating the growth and movement of ER tubules into the growing bud along with She3p; MYO4 has a paralog, MYO2, that arose from the whole genome duplication	0.483703	0.319141	0.454749	0.311581	-0.289553	-0.069695	0.161123	-0.0321174	0.0766829	-0.084648	-0.391066	0.742975	0.907928	0.931903	0.752	0.89425	0.845907	0.979465	0.902612	0.957553	0.901092	0.763578	0
GTCCACCTTGGTTAGTATAA	+	chrI	91370	91392	G299N	G300R	NA	c(-5.875, -6.434)	6.434	FALSE	neProvs	YAL029C	MYO4	Type V myosin motor involved in actin-based transport of cargos; required for mRNA transport, including ASH1 mRNA, and facilitating the growth and movement of ER tubules into the growing bud along with She3p; MYO4 has a paralog, MYO2, that arose from the whole genome duplication	0.130528	0.0406766	0.00179825	-0.0335884	0.043113	0.0533237	-0.0657502	0.0313229	-0.128409	-0.0974293	-0.0225855	0.810603	0.968562	0.998814	0.870434	0.899374	0.804061	0.974411	0.891371	0.900347	0.901092	0.943896	0
TACTAGCCAATCAAAAAGCG	+	chrI	91002	91024	W421*	NA	NA	NA	NA	FALSE	neStops	YAL029C	MYO4	Type V myosin motor involved in actin-based transport of cargos; required for mRNA transport, including ASH1 mRNA, and facilitating the growth and movement of ER tubules into the growing bud along with She3p; MYO4 has a paralog, MYO2, that arose from the whole genome duplication	-0.0541833	0.316465	0.41256	-0.290357	-0.0290624	0.371579	0.341698	0.108998	-0.112082	-0.175445	-0.0602167	0.93135	0.891464	0.944203	0.677146	0.9137	0.526346	0.905916	0.88281	0.949273	0.901092	0.940156	0
TGGTACCCTCACAAAGAACA	-	chrI	92221	92243	P12F	NA	NA	-9.741	9.741	FALSE	neProvs	YAL029C	MYO4	Type V myosin motor involved in actin-based transport of cargos; required for mRNA transport, including ASH1 mRNA, and facilitating the growth and movement of ER tubules into the growing bud along with She3p; MYO4 has a paralog, MYO2, that arose from the whole genome duplication	-0.314853	-0.134289	0.114732	-0.0156694	0.163649	0.172256	0.035423	-0.391971	-0.112013	0.232457	0.303592	0.808403	0.9567	0.993269	0.892952	0.899374	0.805458	0.999797	0.790116	0.949708	0.901092	0.87395	0
TTATCGCAATTAAGAGCTTG	-	chrI	90205	90227	S683L	Q684*	NA	c(-5.987, NA)	5.987	FALSE	neStops	YAL029C	MYO4	Type V myosin motor involved in actin-based transport of cargos; required for mRNA transport, including ASH1 mRNA, and facilitating the growth and movement of ER tubules into the growing bud along with She3p; MYO4 has a paralog, MYO2, that arose from the whole genome duplication	0.688114	0.182206	-0.142866	0.00660942	0.097093	-0.128069	-0.151718	0.291854	0.354371	0.611111	-0.110858	0.143387	0.936122	0.990002	0.894654	0.899374	0.801175	0.971844	0.817971	0.833607	0.558461	0.921782	0
TTGCCATTGCAATTTGTAAA	+	chrI	86348	86370	W227*	NA	NA	NA	NA	FALSE	neStops	YAL031C	GIP4	Cytoplasmic protein that regulates protein phosphatase 1 Glc7p; protein overexpression relocalizes Glc7p from the nucleus and prevents chromosome segregation; potential Cdc28p substrate	0.27255	-0.165669	0.187846	-0.0158859	0.11831	0.0553268	0.0240688	0.0325235	-0.0905551	0.310643	-0.371542	0.875348	0.9567	0.988601	0.892952	0.899374	0.84847	0.999797	0.899491	0.951669	0.901092	0.62922	0
GAACCAAGTCATACATTCAG	-	chrI	84247	84269	T70I	NA	NA	-5.95	5.95	TRUE	eProvs	YAL032C	PRP45	Protein required for pre-mRNA splicing; associates with the spliceosome and interacts with splicing factors Prp22p and Prp46p; orthologous to human transcriptional coactivator SKIP and can activate transcription of a reporter gene	-0.190214	-0.0614582	-0.293127	0.27452	-0.0269737	-0.0363355	0.141171	0.00218952	0.42378	-0.0301219	0.184774	0.854459	0.971991	0.983555	0.691311	0.9137	0.854407	0.965996	0.907462	0.815935	0.903529	0.876579	0
GAAGCGGCTTGCTATGGAAC	-	chrI	83778	83800	R227W	L228F	NA	c(-5.955, -1.208)	5.955	TRUE	eProvs	YAL032C	PRP45	Protein required for pre-mRNA splicing; associates with the spliceosome and interacts with splicing factors Prp22p and Prp46p; orthologous to human transcriptional coactivator SKIP and can activate transcription of a reporter gene	-0.120333	-0.00354323	0.445549	0.223073	0.176114	-0.0892886	0.248318	-0.279887	0.171468	-0.0904651	0.0437721	0.911455	0.980348	0.915762	0.788042	0.897754	0.821246	0.891718	0.819109	0.925007	0.901092	0.942315	0
GTATCCGAAAAGATAATTCT	-	chrI	83603	83625	S285F	NA	NA	-6	6	TRUE	eProvs	YAL032C	PRP45	Protein required for pre-mRNA splicing; associates with the spliceosome and interacts with splicing factors Prp22p and Prp46p; orthologous to human transcriptional coactivator SKIP and can activate transcription of a reporter gene	0.0848142	0.00217762	0.03753	-0.0567579	-0.0597745	0.353888	-0.22805	-0.0947613	0.225053	0.037411	-0.0569079	0.918539	0.980591	0.995866	0.880169	0.899374	0.446216	0.929099	0.882769	0.900347	0.903529	0.939606	0
GTGCCTGTTCTCCATATGGA	-	chrI	84023	84045	P145F	NA	NA	-10.4	10.4	TRUE	eProvs	YAL032C	PRP45	Protein required for pre-mRNA splicing; associates with the spliceosome and interacts with splicing factors Prp22p and Prp46p; orthologous to human transcriptional coactivator SKIP and can activate transcription of a reporter gene	-0.140831	0.362752	-0.0436369	-0.124881	-0.239288	0.0609376	-0.0471037	0.41276	-0.382925	-0.0286293	0.194883	0.905558	0.810888	0.995866	0.835383	0.866239	0.849855	0.999238	0.746314	0.840049	0.903529	0.87395	0
GCATCACAGAGCATCGCCTG	+	chrI	82807	82829	H36Y	NA	NA	-5.4	5.4	TRUE	eProvs	YAL033W	POP5	Subunit of both RNase MRP and nuclear RNase P; RNase MRP cleaves pre-rRNA, while nuclear RNase P cleaves tRNA precursors to generate mature 5' ends and facilitates turnover of nuclear RNAs	0.0405094	0.0991269	-0.103796	-0.26674	0.210356	0.0250648	0.0109851	-0.0619769	-0.199019	-0.0963843	-0.0455253	0.933108	0.956706	0.990002	0.622663	0.891921	0.861242	0.999797	0.892067	0.907532	0.901092	0.94001	0
TTTCAAATAAGACGTCTACG	+	chrI	82935	82957	S78L	NA	NA	-6	6	TRUE	eProvs	YAL033W	POP5	Subunit of both RNase MRP and nuclear RNase P; RNase MRP cleaves pre-rRNA, while nuclear RNase P cleaves tRNA precursors to generate mature 5' ends and facilitates turnover of nuclear RNAs	-0.146046	0.164225	0.489461	-0.461594	-0.531663	-0.343688	-0.305063	NA	-0.401281	-0.0998952	0.137755	0.911455	0.9567	0.935051	0.610019	0.869472	0.635099	0.938014	NA	0.899806	0.901092	0.924468	0
GGTACCGCTACGCCACCTAC	-	chrI	81496	81518	R147C	NA	NA	-5.833	5.833	FALSE	neProvs	YAL034C	FUN19	Non-essential protein of unknown function; expression induced in response to heat stress; FUN19 has a paralog, YOR338W, that arose from the whole genome duplication	0.00174483	0.140803	-0.00655935	-0.0569459	0.0831706	-0.00526132	-0.0019743	-0.178487	-0.132432	0.0917818	0.0228258	0.943687	0.94344	0.9985	0.882396	0.899374	0.870662	0.999797	0.853439	0.942567	0.901092	0.951737	0
TTCCAAGCTTTCGAGAAGGT	-	chrI	80747	80769	Q396*	A397V	NA	c(NA, -3.998)	3.998	FALSE	neStops	YAL034C	FUN19	Non-essential protein of unknown function; expression induced in response to heat stress; FUN19 has a paralog, YOR338W, that arose from the whole genome duplication	-0.370597	-0.106028	NA	-0.25786	-0.274127	-0.00583536	NA	0.0891396	0.438484	NA	NA	0.877896	0.971991	NA	0.822621	0.899374	0.872852	NA	0.893151	0.906685	NA	NA	0
TCGAATCCCTGAAGAGTATT	+	chrI	79993	80015	P95S	NA	NA	-8	8	TRUE	eProvs	YAL034W-A	MTW1	Essential component of the MIND kinetochore complex; joins kinetochore subunits contacting DNA to those contacting microtubules; critical to kinetochore assembly; complex consists of Mtw1p Including Nnf1p-Nsl1p-Dsn1p (MIND)	0.0339272	0.159949	-0.186355	0.16516	-0.0419681	0.309043	0.0773324	0.115963	0.0130712	0.182059	-0.0374534	0.933108	0.925329	0.986573	0.771936	0.913392	0.447049	0.990522	0.868277	0.961765	0.901092	0.940156	0
ACCTGTCCAAGAAGTAAAGA	+	chrI	79201	79223	Q928*	NA	NA	NA	NA	FALSE	neStops	YAL035W	FUN12	Translation initiation factor eIF5B; GTPase that promotes Met-tRNAiMet binding to ribosomes and ribosomal subunit joining; promotes GTP-dependent maturation of 18S rRNA by Nob1p; protein abundance increases in response to DNA replication stress; homolog of bacterial IF2	-0.511536	-0.156231	0.0713768	0.114959	0.156187	-0.193526	-0.0580391	0.992611	-0.145771	-0.0855508	0.0378835	0.556579	0.9567	0.995762	0.848774	0.899374	0.735073	0.999238	0.33052	0.943198	0.901092	0.95091	0
AGCTCAAAAGGAGAAGAACA	+	chrI	76780	76802	Q120*	NA	NA	NA	NA	FALSE	neStops	YAL035W	FUN12	Translation initiation factor eIF5B; GTPase that promotes Met-tRNAiMet binding to ribosomes and ribosomal subunit joining; promotes GTP-dependent maturation of 18S rRNA by Nob1p; protein abundance increases in response to DNA replication stress; homolog of bacterial IF2	NA	NA	NA	NA	NA	-0.863382	NA	NA	NA	NA	NA	NA	NA	NA	NA	NA	0.396345	NA	NA	NA	NA	NA	0
ATCAGACAAACCAACGTTCA	+	chrI	77699	77721	Q427*	NA	NA	NA	NA	FALSE	neStops	YAL035W	FUN12	Translation initiation factor eIF5B; GTPase that promotes Met-tRNAiMet binding to ribosomes and ribosomal subunit joining; promotes GTP-dependent maturation of 18S rRNA by Nob1p; protein abundance increases in response to DNA replication stress; homolog of bacterial IF2	-0.0226573	0.209532	0.29868	-0.155193	-0.106786	-0.052339	0.0499276	0.235817	0.100978	0.00408593	-0.21909	0.93822	0.907928	0.937335	0.818013	0.899374	0.84467	0.999238	0.827894	0.943198	0.91368	0.828775	0
CCAACAGAACTACTGGGATG	+	chrI	76450	76472	Q10*	NA	NA	NA	NA	FALSE	neStops	YAL035W	FUN12	Translation initiation factor eIF5B; GTPase that promotes Met-tRNAiMet binding to ribosomes and ribosomal subunit joining; promotes GTP-dependent maturation of 18S rRNA by Nob1p; protein abundance increases in response to DNA replication stress; homolog of bacterial IF2	-1.43624	-0.738649	-0.338114	-0.106503	-0.924235	-0.383297	-1.03211	-0.200892	-1.4776	-0.212814	-0.576375	0.000149546	0.242633	0.983555	0.863361	0.189958	0.456776	0.0659157	0.862889	0.00667128	0.901092	0.498473	2
CTAACCCGATAGACATCACA	-	chrI	78757	78779	G783K	NA	NA	-6.029	6.029	FALSE	neProvs	YAL035W	FUN12	Translation initiation factor eIF5B; GTPase that promotes Met-tRNAiMet binding to ribosomes and ribosomal subunit joining; promotes GTP-dependent maturation of 18S rRNA by Nob1p; protein abundance increases in response to DNA replication stress; homolog of bacterial IF2	0.392587	-0.204845	0.0288636	0.0651708	0.189005	-0.275264	0.220348	0.248028	-0.0214628	0.118271	-0.286892	0.363696	0.886252	0.997475	0.865382	0.875057	0.57724	0.91111	0.804943	0.960122	0.901092	0.717707	0
GGCCCAACAGCAAGCTCAAA	+	chrI	76768	76790	Q116*	Q117*	NA	c(NA, NA)	NA	FALSE	neStops	YAL035W	FUN12	Translation initiation factor eIF5B; GTPase that promotes Met-tRNAiMet binding to ribosomes and ribosomal subunit joining; promotes GTP-dependent maturation of 18S rRNA by Nob1p; protein abundance increases in response to DNA replication stress; homolog of bacterial IF2	-0.114805	-0.193299	0.0508577	0.102271	-0.151739	-0.0110403	0.0638174	-0.241961	-0.0799167	-0.254512	-0.197197	0.912987	0.936122	0.995762	0.851576	0.899374	0.866931	0.999238	0.849158	0.955023	0.901092	0.87395	0
GTGGTCCAAGCATCCACCTT	+	chrI	78692	78714	Q758*	NA	NA	NA	NA	FALSE	neStops	YAL035W	FUN12	Translation initiation factor eIF5B; GTPase that promotes Met-tRNAiMet binding to ribosomes and ribosomal subunit joining; promotes GTP-dependent maturation of 18S rRNA by Nob1p; protein abundance increases in response to DNA replication stress; homolog of bacterial IF2	-1.43442	-1.30437	-0.730344	-0.468703	-1.15262	-0.794109	-1.44586	0.0502979	-2.03754	-0.945854	-1.15501	1.24302e-09	2.57647e-06	0.120537	0.330927	4.65415e-05	0.0104367	4.84818e-06	0.892371	8.36112e-12	0.0135806	0.000245413	8
TCATACCACACAGTACAATA	-	chrI	78406	78428	G666N	NA	NA	-6	6	FALSE	neProvs	YAL035W	FUN12	Translation initiation factor eIF5B; GTPase that promotes Met-tRNAiMet binding to ribosomes and ribosomal subunit joining; promotes GTP-dependent maturation of 18S rRNA by Nob1p; protein abundance increases in response to DNA replication stress; homolog of bacterial IF2	-0.0749544	0.193249	-0.136932	0.134358	0.175027	0.0343415	0.0477009	-0.0153699	0.148385	-0.108173	-0.0620447	0.919376	0.925329	0.988601	0.831206	0.897754	0.854407	0.999238	0.904652	0.932425	0.901092	0.936086	0
TTGGACTCCGTTGACACAAC	+	chrI	78659	78681	S747F	NA	NA	-5.713	5.713	FALSE	neProvs	YAL035W	FUN12	Translation initiation factor eIF5B; GTPase that promotes Met-tRNAiMet binding to ribosomes and ribosomal subunit joining; promotes GTP-dependent maturation of 18S rRNA by Nob1p; protein abundance increases in response to DNA replication stress; homolog of bacterial IF2	0.160956	-0.0388065	0.128872	-0.096761	0.279831	-0.0364907	0.103663	0.0882211	0.0318867	0.45606	0.158695	0.887547	0.977007	0.990002	0.85124	0.867761	0.854407	0.983717	0.890397	0.959677	0.764109	0.916954	0
ACCACCCTGGTTACCGTCCC	-	chrI	75839	75861	T99I	NA	NA	-5.937	5.937	FALSE	neProvs	YAL036C	RBG1	Member of the DRG family of GTP-binding proteins; associates with translating ribosomes; interacts with Tma46p, Ygr250cp, Gir2p and Yap1p via two-hybrid	-0.144594	-0.0409175	0.0233538	-0.522814	0.0589997	0.152739	-0.289415	0.356589	-0.0718983	-0.337519	-0.196227	0.877896	0.973678	0.9985	0.261391	0.899374	0.758558	0.855798	0.746766	0.952788	0.87783	0.835502	0
GACACCGGGGACGGTAACCA	+	chrI	75835	75857	G105N	NA	NA	-5.742	5.742	FALSE	neProvs	YAL036C	RBG1	Member of the DRG family of GTP-binding proteins; associates with translating ribosomes; interacts with Tma46p, Ygr250cp, Gir2p and Yap1p via two-hybrid	0.0109314	0.0491353	0.0353115	0.122912	0.0899635	-0.18493	-0.491051	-0.15642	-0.409883	0.0980933	0.184308	0.940933	0.973678	0.99623	0.835544	0.899374	0.730442	0.529739	0.86479	0.790543	0.901092	0.850156	0
GTCTGGTCAAGATTGGAACT	-	chrI	75312	75334	Q276*	NA	NA	NA	NA	FALSE	neStops	YAL036C	RBG1	Member of the DRG family of GTP-binding proteins; associates with translating ribosomes; interacts with Tma46p, Ygr250cp, Gir2p and Yap1p via two-hybrid	-0.147948	-0.254862	0.0993099	0.149391	-0.236464	0.184818	0.383078	-0.272724	-0.185496	-0.0911628	-0.539676	0.916262	0.925329	0.995762	0.836457	0.899374	0.789135	0.912288	0.850897	0.937088	0.901092	0.564074	0
TACCAGGTAAATCCAACATT	+	chrI	75789	75811	G121S	NA	NA	-5.711	5.711	FALSE	neProvs	YAL036C	RBG1	Member of the DRG family of GTP-binding proteins; associates with translating ribosomes; interacts with Tma46p, Ygr250cp, Gir2p and Yap1p via two-hybrid	0.242432	-0.469746	0.265251	0.0120453	0.00630195	0.118662	0.22619	0.698317	-0.0349365	-0.144307	0.153906	0.852832	0.683651	0.986305	0.892952	0.922415	0.80951	0.938944	0.463547	0.959205	0.901092	0.912094	0
TCATAAGCAAATCATTGAGA	-	chrI	75660	75682	Q160*	NA	NA	NA	NA	FALSE	neStops	YAL036C	RBG1	Member of the DRG family of GTP-binding proteins; associates with translating ribosomes; interacts with Tma46p, Ygr250cp, Gir2p and Yap1p via two-hybrid	NA	NA	NA	NA	NA	-0.177147	NA	NA	NA	NA	NA	NA	NA	NA	NA	NA	0.824797	NA	NA	NA	NA	NA	0
TGACACCGGGGACGGTAACC	+	chrI	75834	75856	G105N	V106I	NA	c(-5.742, -0.596)	5.742	FALSE	neProvs	YAL036C	RBG1	Member of the DRG family of GTP-binding proteins; associates with translating ribosomes; interacts with Tma46p, Ygr250cp, Gir2p and Yap1p via two-hybrid	-0.0334545	0.0595874	-0.0320668	0.322072	-0.0724162	0.221624	-0.249725	-0.154801	-0.0961193	-0.0682258	0.0244572	0.934776	0.971991	0.998241	0.657165	0.899374	0.705661	0.920019	0.869683	0.948104	0.901092	0.951527	0
GTTGGACAGTACTTGCAGAT	+	chrI	74326	74348	Q105*	NA	NA	NA	NA	FALSE	neStops	YAL037W	YAL037W	Putative protein of unknown function; YAL037W has a paralog, YOR342C, that arose from the whole genome duplication	-0.140372	-0.445214	-0.140216	-0.0667415	-0.570787	0.00928188	-0.212413	-0.254443	-0.31517	-0.0723124	0.327463	0.918585	0.792807	0.990002	0.882396	0.714457	0.868743	0.95696	0.843393	0.91087	0.901092	0.804932	0
AAGGGTCCAGAAATCAGAAC	+	chrI	72041	72063	P88L	NA	NA	-9.867	9.867	TRUE	eProvs	YAL038W	CDC19	Pyruvate kinase; functions as a homotetramer in glycolysis to convert phosphoenolpyruvate to pyruvate, the input for aerobic (TCA cycle) or anaerobic (glucose fermentation) respiration; regulated via allosteric activation by fructose bisphosphate; CDC19 has a paralog, PYK2, that arose from the whole genome duplication	0.896987	NA	-0.437152	0.0983022	NA	0.213995	NA	1.02676	1.79252	0.852438	0.635346	0.143788	NA	0.949642	0.871178	NA	0.770966	NA	0.409199	9.98488e-10	0.478289	0.431188	1
GTCCGTATGAACTTCTCTCA	+	chrI	71927	71949	R49C	NA	NA	-7.796	7.796	TRUE	eProvs	YAL038W	CDC19	Pyruvate kinase; functions as a homotetramer in glycolysis to convert phosphoenolpyruvate to pyruvate, the input for aerobic (TCA cycle) or anaerobic (glucose fermentation) respiration; regulated via allosteric activation by fructose bisphosphate; CDC19 has a paralog, PYK2, that arose from the whole genome duplication	NA	-0.884185	-0.381682	0.500062	0.08731	-0.740216	0.279764	3.10965	1.88407	0.848545	-0.335702	NA	0.47002	0.974247	0.520172	0.899374	0.131696	0.938944	4.86024e-22	1.85269e-09	0.108786	0.87395	2
GTGGTACCAGTTCTGATTTC	-	chrI	72047	72069	G93N	NA	NA	-5.92	5.92	TRUE	eProvs	YAL038W	CDC19	Pyruvate kinase; functions as a homotetramer in glycolysis to convert phosphoenolpyruvate to pyruvate, the input for aerobic (TCA cycle) or anaerobic (glucose fermentation) respiration; regulated via allosteric activation by fructose bisphosphate; CDC19 has a paralog, PYK2, that arose from the whole genome duplication	0.80101	-0.525019	-0.808581	0.656109	0.505227	-0.325206	1.43377	3.03103	2.34996	0.610692	-0.0277214	0.210103	0.843829	0.792959	0.385928	0.807763	0.704674	0.000476962	4.41652e-18	9.40902e-17	0.672728	0.95205	3
TCTACCTGGGTACAATTCTT	-	chrI	71994	72016	G76N	NA	NA	-5.617	5.617	TRUE	eProvs	YAL038W	CDC19	Pyruvate kinase; functions as a homotetramer in glycolysis to convert phosphoenolpyruvate to pyruvate, the input for aerobic (TCA cycle) or anaerobic (glucose fermentation) respiration; regulated via allosteric activation by fructose bisphosphate; CDC19 has a paralog, PYK2, that arose from the whole genome duplication	0.403399	0.183901	0.181369	0.254068	-0.0916751	0.481847	0.190535	0.410336	0.809723	0.191145	0.316044	0.306366	0.925329	0.984118	0.654695	0.899374	0.108823	0.938944	0.572672	0.0255438	0.901092	0.574552	1
TGGACCGATGGTACCAATGA	-	chrI	71850	71872	G28N	NA	NA	-5.821	5.821	TRUE	eProvs	YAL038W	CDC19	Pyruvate kinase; functions as a homotetramer in glycolysis to convert phosphoenolpyruvate to pyruvate, the input for aerobic (TCA cycle) or anaerobic (glucose fermentation) respiration; regulated via allosteric activation by fructose bisphosphate; CDC19 has a paralog, PYK2, that arose from the whole genome duplication	NA	0.0615128	NA	NA	0.0239148	NA	NA	NA	NA	NA	NA	NA	0.978346	NA	NA	0.916128	NA	NA	NA	NA	NA	NA	0
AAACCCGCTGAACAATATGC	-	chrI	69348	69370	P54L	NA	NA	-9.419	9.419	FALSE	neProvs	YAL039C	CYC3	Cytochrome c heme lyase (holocytochrome c synthase); attaches heme to apo-cytochrome c (Cyc1p or Cyc7p) in mitochondrial intermembrane space; human homolog HCCS implicated in microphthalmia with linear skin defects (MLS), and can complement yeast null mutant	0.196252	0.0116862	-0.17771	0.490895	-0.13276	-0.258083	-0.0175116	-0.279903	-0.300635	0.03246	0.047105	0.876768	0.980114	0.988598	0.455322	0.899374	0.583662	0.999797	0.823092	0.89463	0.903529	0.942728	0
ATCCAGTCGTGCCTGTCGAA	+	chrI	68939	68961	D194N	W195*	NA	c(-4.948, NA)	4.948	FALSE	neStops	YAL039C	CYC3	Cytochrome c heme lyase (holocytochrome c synthase); attaches heme to apo-cytochrome c (Cyc1p or Cyc7p) in mitochondrial intermembrane space; human homolog HCCS implicated in microphthalmia with linear skin defects (MLS), and can complement yeast null mutant	0.223769	-0.135132	-0.279308	0.248774	-0.307064	0.00187572	-0.0294157	-0.139061	-0.212137	0.176243	-0.147844	0.850929	0.9567	0.983555	0.697651	0.833814	0.873379	0.999797	0.872532	0.922535	0.901092	0.91524	0
GCTCGCTGGATGCACCTGTG	-	chrI	68996	69018	R171C	NA	NA	-6.953	6.953	FALSE	neProvs	YAL039C	CYC3	Cytochrome c heme lyase (holocytochrome c synthase); attaches heme to apo-cytochrome c (Cyc1p or Cyc7p) in mitochondrial intermembrane space; human homolog HCCS implicated in microphthalmia with linear skin defects (MLS), and can complement yeast null mutant	-0.00815529	0.310518	0.241512	-0.0110264	-0.371441	0.00703268	0.328096	-0.0588453	-0.217908	0.10687	-0.0478376	0.942127	0.878625	0.984118	0.892952	0.827962	0.868743	0.897762	0.892341	0.925007	0.901092	0.942021	0
GCTGGCAGGAAGTGCTCGAA	-	chrI	69100	69122	Q137*	NA	NA	NA	NA	FALSE	neStops	YAL039C	CYC3	Cytochrome c heme lyase (holocytochrome c synthase); attaches heme to apo-cytochrome c (Cyc1p or Cyc7p) in mitochondrial intermembrane space; human homolog HCCS implicated in microphthalmia with linear skin defects (MLS), and can complement yeast null mutant	0.43462	-0.101881	-0.0844654	-0.490481	-0.136959	0.392144	NA	-0.0850701	NA	NA	NA	0.850929	0.971991	0.995762	0.697729	0.899374	0.628657	NA	0.892341	NA	NA	NA	0
GTCCACAACTTTCTAAATGA	-	chrI	69125	69147	H128Y	NA	NA	-5.996	5.996	FALSE	neProvs	YAL039C	CYC3	Cytochrome c heme lyase (holocytochrome c synthase); attaches heme to apo-cytochrome c (Cyc1p or Cyc7p) in mitochondrial intermembrane space; human homolog HCCS implicated in microphthalmia with linear skin defects (MLS), and can complement yeast null mutant	0.108839	-0.194641	0.0423873	0.106213	0.13687	-0.00637127	0.135695	0.0773051	-0.0461055	0.202719	0.172492	0.911485	0.907928	0.995762	0.844026	0.898896	0.868743	0.969132	0.886265	0.958911	0.901092	0.89202	0
AAGAGCCCCGATTCTTTGCT	-	chrI	63882	63904	G353E	A354T	NA	c(-8, -1.867)	8	TRUE	eProvs	YAL041W	CDC24	Guanine nucleotide exchange factor (GEF) for Cdc42p; required for polarity establishment and maintenance, and mutants have morphological defects in bud formation and shmooing; relocalizes from nucleus to cytoplasm upon DNA replication stress; thermosensitivity of the cdc24-4 mutant in the presence of sorbitol is functionally complemented by human CDC42	0.262454	0.0873087	-0.00843543	0.077186	0.0311014	-0.0825049	-0.255207	-0.0283255	0.330507	0.239287	0.221289	0.607405	0.9567	0.9985	0.848083	0.9137	0.801331	0.855798	0.898302	0.601738	0.885443	0.745279	0
ATATCTACAAAGCCTTTGCA	-	chrI	64068	64090	C415Y	R416K	NA	c(-10.267, 0.8)	10.267	TRUE	eProvs	YAL041W	CDC24	Guanine nucleotide exchange factor (GEF) for Cdc42p; required for polarity establishment and maintenance, and mutants have morphological defects in bud formation and shmooing; relocalizes from nucleus to cytoplasm upon DNA replication stress; thermosensitivity of the cdc24-4 mutant in the presence of sorbitol is functionally complemented by human CDC42	-0.42613	-0.740139	0.00532176	0.111128	-0.138677	-0.0568746	0.00848707	0.188307	0.144443	-0.0264778	0.477542	0.764702	0.165434	0.9985	0.848774	0.899374	0.851549	0.999797	0.862461	0.940889	0.903529	0.474978	0
GGGTCGCAATCCATGGTAAT	-	chrI	63287	63309	C155Y	D156N	NA	c(-5.667, -5)	5.667	TRUE	eProvs	YAL041W	CDC24	Guanine nucleotide exchange factor (GEF) for Cdc42p; required for polarity establishment and maintenance, and mutants have morphological defects in bud formation and shmooing; relocalizes from nucleus to cytoplasm upon DNA replication stress; thermosensitivity of the cdc24-4 mutant in the presence of sorbitol is functionally complemented by human CDC42	0.0927244	0.0995202	0.0761851	-0.122044	-0.0497573	0.015744	0.255225	-0.327363	-0.142979	0.102943	-0.0268713	0.907803	0.949944	0.990002	0.80325	0.899374	0.863301	0.819557	0.711082	0.929242	0.901092	0.9459	0
TATCTACAAAGCCTTTGCAC	-	chrI	64067	64089	C415Y	R416K	NA	c(-10.267, 0.8)	10.267	TRUE	eProvs	YAL041W	CDC24	Guanine nucleotide exchange factor (GEF) for Cdc42p; required for polarity establishment and maintenance, and mutants have morphological defects in bud formation and shmooing; relocalizes from nucleus to cytoplasm upon DNA replication stress; thermosensitivity of the cdc24-4 mutant in the presence of sorbitol is functionally complemented by human CDC42	NA	NA	NA	NA	NA	NA	NA	-0.388764	NA	NA	NA	NA	NA	NA	NA	NA	NA	NA	0.820884	NA	NA	NA	0
AAAGCACAGAGATCGATCTG	+	chrI	62525	62547	A405V	Q406*	NA	c(-3.043, NA)	3.043	FALSE	neStops	YAL042W	ERV46	Protein localized to COPII-coated vesicles; forms a complex with Erv41p; involved in the membrane fusion stage of transport	-0.0658553	-0.301227	-0.302262	0.147988	-0.172871	-0.274943	-0.225773	0.220796	0.122218	-0.0742988	0.0334175	0.922315	0.85085	0.952434	0.831554	0.898896	0.562044	0.951476	0.846141	0.945286	0.901092	0.947679	0
ATCCAAACACACTTCACGTT	+	chrI	62343	62365	P344L	NA	NA	-8.375	8.375	FALSE	neProvs	YAL042W	ERV46	Protein localized to COPII-coated vesicles; forms a complex with Erv41p; involved in the membrane fusion stage of transport	-0.204603	-0.214279	-0.219788	0.0407735	0.24679	0.0217948	0.222787	-0.209782	-0.118875	0.179418	0.189937	0.822269	0.88815	0.983555	0.882396	0.80734	0.860789	0.862855	0.80945	0.932425	0.901092	0.828775	0
CCCCACCAGATATGAGTACT	+	chrI	62242	62264	T311I	NA	NA	-5.701	5.701	FALSE	neProvs	YAL042W	ERV46	Protein localized to COPII-coated vesicles; forms a complex with Erv41p; involved in the membrane fusion stage of transport	0.00472017	0.0254264	-0.05202	0.169462	0.255729	0.00366579	0.0849479	0.150604	0.00870248	0.1135	0.0197115	0.942127	0.978254	0.995762	0.781638	0.828982	0.871129	0.986028	0.855324	0.962502	0.901092	0.951737	0
TAACATGGCCCACAATAGTT	-	chrI	61724	61746	C143Y	NA	NA	-10.908	10.908	FALSE	neProvs	YAL042W	ERV46	Protein localized to COPII-coated vesicles; forms a complex with Erv41p; involved in the membrane fusion stage of transport	0.0492206	-0.226024	0.00566857	0.314481	0.131919	-0.00334919	0.419864	-0.256784	0.0650065	-0.155545	-0.500968	0.93228	0.907928	0.9985	0.695164	0.899374	0.872118	0.815518	0.819109	0.956754	0.901092	0.261382	0
TGCACAAATTAACAGAATTC	+	chrI	61948	61970	Q213*	NA	NA	NA	NA	FALSE	neStops	YAL042W	ERV46	Protein localized to COPII-coated vesicles; forms a complex with Erv41p; involved in the membrane fusion stage of transport	-0.0626837	-0.102346	-0.1486	-1.15564	-0.455259	0.0620583	0.0911351	0.0832864	-0.425439	0.428946	-0.19972	0.933192	0.971991	0.990002	0.103685	0.874925	0.85079	0.999238	0.891935	0.838361	0.885443	0.898132	0
AAACCAAGGGAACTTCTTGC	+	chrI	58828	58850	G741N	NA	NA	-5.865	5.865	TRUE	eProvs	YAL043C	PTA1	Subunit of holo-CPF; holo-CPF is a multiprotein complex and functional homolog of mammalian CPSF, required for the cleavage and polyadenylation of mRNA and snoRNA 3' ends; involved in pre-tRNA processing; binds to the phosphorylated CTD of RNAPII	-0.254936	-0.058959	0.0867126	-0.260077	0.0305239	-0.00499541	-0.635879	-0.32923	0.117677	-0.559081	-0.254826	0.866065	0.971991	0.995762	0.743	0.9137	0.871541	0.819557	0.788513	0.948104	0.787886	0.87395	0
CCACCCTGTGTTGAACAAAC	-	chrI	60440	60462	P199F	NA	NA	-7.7	7.7	TRUE	eProvs	YAL043C	PTA1	Subunit of holo-CPF; holo-CPF is a multiprotein complex and functional homolog of mammalian CPSF, required for the cleavage and polyadenylation of mRNA and snoRNA 3' ends; involved in pre-tRNA processing; binds to the phosphorylated CTD of RNAPII	0.00879588	0.262618	0.155882	-0.396512	-0.237197	-0.245255	0.00634779	-0.0131049	0.354067	0.208432	-0.023173	0.941618	0.907928	0.988601	0.610534	0.875122	0.656147	0.999797	0.905146	0.814327	0.901092	0.951737	0
GATTGTCTATCGTTGCTTCG	-	chrI	59619	59641	S473F	NA	NA	-5.6	5.6	TRUE	eProvs	YAL043C	PTA1	Subunit of holo-CPF; holo-CPF is a multiprotein complex and functional homolog of mammalian CPSF, required for the cleavage and polyadenylation of mRNA and snoRNA 3' ends; involved in pre-tRNA processing; binds to the phosphorylated CTD of RNAPII	0.0739599	-0.159149	-0.173207	0.428007	0.674888	-0.270557	-0.554683	0.180119	-0.384412	0.210836	-0.0302559	0.93228	0.961226	0.988601	0.593148	0.529675	0.697403	0.879083	0.877351	0.870793	0.901092	0.951527	0
AGAACAGTACGAAAAGACAC	-	chrI	57964	57986	Q161*	NA	NA	NA	NA	FALSE	neStops	YAL044C	GCV3	H subunit of the mitochondrial glycine decarboxylase complex; glycine decarboxylase is required for the catabolism of glycine to 5,10-methylene-THF; also required for all protein lipoylation; expression is regulated by levels of 5,10-methylene-THF	-0.27032	-0.17007	-0.0283497	0.0912159	-0.00946923	0.211202	-0.0414603	-0.00331112	0.0918312	0.0573682	-0.0153142	0.825229	0.936122	0.998363	0.864195	0.921745	0.710751	0.999238	0.907462	0.948104	0.903529	0.952099	0
TGGACCCTAGCGACTCACCT	+	chrI	58171	58193	G96K	NA	NA	-7.2	7.2	FALSE	neProvs	YAL044C	GCV3	H subunit of the mitochondrial glycine decarboxylase complex; glycine decarboxylase is required for the catabolism of glycine to 5,10-methylene-THF; also required for all protein lipoylation; expression is regulated by levels of 5,10-methylene-THF	-0.0480898	0.0233661	-0.14982	-0.217382	0.272612	0.344703	0.224711	-0.334436	0.185133	0.176882	-0.0624375	0.93228	0.980103	0.988601	0.780969	0.891921	0.476494	0.945045	0.801924	0.930302	0.901092	0.939175	0
AAAAAATCAGTTAAATACTT	-	chrI	55486	55508	Q453*	NA	NA	NA	NA	FALSE	neStops	YAL047C	SPC72	Gamma-tubulin small complex (gamma-TuSC) receptor; recruits the gamma-TuSC complex to the cytoplasmic side of the SPB, connecting nuclear microtubules to the SPB; involved in astral microtubule formation, stabilization, and with Stu2p, anchoring astral MTs at the cytoplasmic face of the SPB, and regulating plus-end MT dynamics; regulated by Cdc5 kinase	0.0456912	-0.27907	-0.0192681	-0.609202	0.186115	0.238707	0.432837	-0.649008	-0.36947	-0.260598	-0.0187447	0.934776	0.907928	0.9985	0.455322	0.899374	0.740207	0.865335	0.769843	0.899033	0.901092	0.952099	0
CCAGAGCAGCCACATCAACA	-	chrI	55179	55201	Q555*	NA	NA	NA	NA	FALSE	neStops	YAL047C	SPC72	Gamma-tubulin small complex (gamma-TuSC) receptor; recruits the gamma-TuSC complex to the cytoplasmic side of the SPB, connecting nuclear microtubules to the SPB; involved in astral microtubule formation, stabilization, and with Stu2p, anchoring astral MTs at the cytoplasmic face of the SPB, and regulating plus-end MT dynamics; regulated by Cdc5 kinase	0.0846245	0.238502	0.237412	-0.341731	-0.0402976	0.661719	0.269794	0.312157	0.141274	0.105998	-0.334325	0.927181	0.936122	0.988598	0.648965	0.9137	0.229781	0.931413	0.850073	0.94299	0.901092	0.836255	0
CACAAGCCAAATTACGTCGG	+	chrI	54538	54560	W82*	NA	NA	NA	NA	FALSE	neStops	YAL048C	GEM1	Outer mitochondrial membrane GTPase, subunit of the ERMES complex; potential regulatory subunit of the ERMES complex that links the ER to mitochondria and may promote inter-organellar calcium and phospholipid exchange as well as coordinating mitochondrial DNA replication and growth; cells lacking Gem1p contain collapsed, globular, or grape-like mitochondria; ortholog of metazoan Miro GTPases	0.0475516	0.185287	0.0880801	-0.118541	-0.142492	0.201078	-0.243003	-0.291518	0.0806522	0.33883	-0.150324	0.93135	0.925329	0.990002	0.829648	0.899374	0.675483	0.895996	0.774542	0.949708	0.846597	0.898132	0
GCAACCAAAAGAGAGAAACA	+	chrI	54492	54514	W98*	NA	NA	NA	NA	FALSE	neStops	YAL048C	GEM1	Outer mitochondrial membrane GTPase, subunit of the ERMES complex; potential regulatory subunit of the ERMES complex that links the ER to mitochondria and may promote inter-organellar calcium and phospholipid exchange as well as coordinating mitochondrial DNA replication and growth; cells lacking Gem1p contain collapsed, globular, or grape-like mitochondria; ortholog of metazoan Miro GTPases	-0.296622	-0.472973	NA	-0.21593	0.515324	-0.0957214	-1.03792	0.21351	-0.259965	0.300204	-0.10271	0.877896	0.85085	NA	0.843497	0.836048	0.841141	0.419001	0.872795	0.937088	0.901092	0.936086	0
GGGGAGACACGAAACTACAT	-	chrI	53907	53929	H290Y	NA	NA	-5.956	5.956	FALSE	neProvs	YAL048C	GEM1	Outer mitochondrial membrane GTPase, subunit of the ERMES complex; potential regulatory subunit of the ERMES complex that links the ER to mitochondria and may promote inter-organellar calcium and phospholipid exchange as well as coordinating mitochondrial DNA replication and growth; cells lacking Gem1p contain collapsed, globular, or grape-like mitochondria; ortholog of metazoan Miro GTPases	0.0303079	0.246822	0.28446	-0.187026	-0.23094	-0.156126	-0.518025	0.25372	0.144767	-0.0205107	0.00706141	0.934776	0.88443	0.983555	0.778557	0.873018	0.74263	0.419001	0.82496	0.937088	0.903529	0.953669	0
GTCCATAGTTTAGGCAGCCC	+	chrI	53681	53703	W369*	NA	NA	NA	NA	FALSE	neStops	YAL048C	GEM1	Outer mitochondrial membrane GTPase, subunit of the ERMES complex; potential regulatory subunit of the ERMES complex that links the ER to mitochondria and may promote inter-organellar calcium and phospholipid exchange as well as coordinating mitochondrial DNA replication and growth; cells lacking Gem1p contain collapsed, globular, or grape-like mitochondria; ortholog of metazoan Miro GTPases	-0.0660011	0.0739285	-0.0694133	0.0296956	0.209256	-0.0776842	0.277181	0.548481	0.123427	-0.0625162	-0.272999	0.92444	0.971991	0.995762	0.892952	0.891921	0.831895	0.855798	0.534596	0.940762	0.901092	0.803645	0
TGTCCCTGACACTTCCAGTG	-	chrI	53814	53836	P320F	NA	NA	-7.496	7.496	FALSE	neProvs	YAL048C	GEM1	Outer mitochondrial membrane GTPase, subunit of the ERMES complex; potential regulatory subunit of the ERMES complex that links the ER to mitochondria and may promote inter-organellar calcium and phospholipid exchange as well as coordinating mitochondrial DNA replication and growth; cells lacking Gem1p contain collapsed, globular, or grape-like mitochondria; ortholog of metazoan Miro GTPases	-0.115469	0.098263	0.0449493	-0.212901	0.0764617	-0.115742	-0.0622406	-0.133424	0.104812	-0.136285	-0.0160543	0.881037	0.9567	0.995762	0.627691	0.899374	0.740207	0.987992	0.849158	0.932346	0.901092	0.951737	0
AACCAGGCATCACGATCAAT	+	chrI	52309	52331	A94T	W95*	NA	c(-0.996, NA)	0.996	FALSE	neStops	YAL049C	AIM2	Cytoplasmic protein involved in mitochondrial function or organization; null mutant displays reduced frequency of mitochondrial genome loss; potential Hsp82p interactor	-0.456657	0.202835	0.0897125	-0.146127	-0.0349979	0.147867	-0.107883	-0.100957	0.34451	0.282757	-0.10527	0.367169	0.925329	0.993269	0.822012	0.9137	0.76909	0.984474	0.880358	0.798691	0.90095	0.925561	0
TACCAGTTAGACCTCTTCAG	-	chrI	51970	51992	Q203*	NA	NA	NA	NA	FALSE	neStops	YAL049C	AIM2	Cytoplasmic protein involved in mitochondrial function or organization; null mutant displays reduced frequency of mitochondrial genome loss; potential Hsp82p interactor	-0.0714942	-0.214593	-0.292695	0.0425573	-0.0672219	-0.00267848	-0.0839693	-0.309116	0.00499072	0.0572879	0.12718	0.92092	0.89022	0.935051	0.882396	0.899374	0.872118	0.990602	0.756579	0.962971	0.901092	0.898132	0
TCCATCTTTCGTCAGCATCG	-	chrI	52112	52134	S156F	NA	NA	-6	6	FALSE	neProvs	YAL049C	AIM2	Cytoplasmic protein involved in mitochondrial function or organization; null mutant displays reduced frequency of mitochondrial genome loss; potential Hsp82p interactor	-0.0951876	-0.0196674	-0.221378	-0.176852	0.0510963	0.0960509	0.116813	0.0545323	0.114	-0.0264692	-0.000423406	0.918539	0.980103	0.986573	0.809668	0.901676	0.824797	0.986028	0.89452	0.940889	0.903529	0.954412	0
TGTCACGATGGAACACCCAA	-	chrI	52531	52553	H16Y	NA	NA	-5.507	5.507	FALSE	neProvs	YAL049C	AIM2	Cytoplasmic protein involved in mitochondrial function or organization; null mutant displays reduced frequency of mitochondrial genome loss; potential Hsp82p interactor	0.0779419	0.142096	0.118486	0.881558	-0.123402	-0.00862614	-0.0689983	-0.278111	0.0916811	0.017116	0.151226	0.929824	0.9567	0.993269	0.107763	0.899374	0.869268	0.999238	0.846536	0.951416	0.903529	0.921782	0
AAAGAGCAAACGCCAATAGC	+	chrI	51510	51532	Q985*	NA	NA	NA	NA	FALSE	neStops	YAL051W	OAF1	Oleate-activated transcription factor; subunit of a heterodimeric complex with Pip2p, which binds to oleate-response elements (ORE) in the promoter of genes involved in beta-oxidation of fatty acids, peroxisome organization and biogenesis, activating transcription in the presence of oleate; regulates chromatin silencing at telomeres; involved in diauxic shift; OAF1 has a paralog, PIP2, that arose…	-0.145617	-0.148115	-0.24297	-0.101792	-0.127063	-0.126761	0.311091	0.0405881	0.37082	-0.0292838	-0.139465	0.915127	0.9567	0.986305	0.861613	0.899374	0.80951	0.897762	0.89941	0.84946	0.903529	0.921782	0
AAGAGCAAACGCCAATAGCC	+	chrI	51511	51533	Q985*	NA	NA	NA	NA	FALSE	neStops	YAL051W	OAF1	Oleate-activated transcription factor; subunit of a heterodimeric complex with Pip2p, which binds to oleate-response elements (ORE) in the promoter of genes involved in beta-oxidation of fatty acids, peroxisome organization and biogenesis, activating transcription in the presence of oleate; regulates chromatin silencing at telomeres; involved in diauxic shift; OAF1 has a paralog, PIP2, that arose…	0.266635	-0.138956	-0.107095	0.172006	-0.0552238	-0.027992	0.0611411	0.440765	-0.192963	-0.0905186	-0.163129	0.867318	0.9567	0.990002	0.811773	0.899491	0.862689	0.997662	0.756619	0.930165	0.901092	0.898132	0
ACGCAGAAGGCCCCACATGC	+	chrI	48579	48601	Q7*	NA	NA	NA	NA	FALSE	neStops	YAL051W	OAF1	Oleate-activated transcription factor; subunit of a heterodimeric complex with Pip2p, which binds to oleate-response elements (ORE) in the promoter of genes involved in beta-oxidation of fatty acids, peroxisome organization and biogenesis, activating transcription in the presence of oleate; regulates chromatin silencing at telomeres; involved in diauxic shift; OAF1 has a paralog, PIP2, that arose…	-0.0860612	-0.0609409	-0.261649	-0.462733	NA	0.632978	0.21451	NA	NA	-0.422887	0.119612	0.923785	0.973678	0.988601	0.68138	NA	0.474012	0.982173	NA	NA	0.901092	0.934333	0
CCCTCAAGGTGGCGAATATT	+	chrI	49511	49533	Q318*	NA	NA	NA	NA	FALSE	neStops	YAL051W	OAF1	Oleate-activated transcription factor; subunit of a heterodimeric complex with Pip2p, which binds to oleate-response elements (ORE) in the promoter of genes involved in beta-oxidation of fatty acids, peroxisome organization and biogenesis, activating transcription in the presence of oleate; regulates chromatin silencing at telomeres; involved in diauxic shift; OAF1 has a paralog, PIP2, that arose…	0.14745	0.501951	0.196503	-0.108207	-0.393724	0.281868	0.156153	0.288839	-0.159708	0.211115	0.28266	0.904286	0.34006	0.988598	0.848774	0.836122	0.632224	0.958048	0.806688	0.936357	0.901092	0.753361	0
ACACCTGAGATAGCGGCAAT	-	chrI	46451	46473	G191N	NA	NA	-5.875	5.875	FALSE	neProvs	YAL053W	FLC2	Putative calcium channel involved in calcium release under hypotonic stress; required for uptake of FAD into endoplasmic reticulum; involved in cell wall maintenance; FLC2 has a paralog, YOR365C, that arose from the whole genome duplication	0.259694	0.0661615	0.146735	0.442224	0.189462	0.259155	-0.2537	-0.193515	0.109546	0.392361	0.264175	0.825229	0.971991	0.988601	0.359191	0.896146	0.559731	0.907007	0.846141	0.941102	0.787886	0.764723	0
CTTCCAATATAGGAAGAACT	+	chrI	47065	47087	Q391*	NA	NA	NA	NA	FALSE	neStops	YAL053W	FLC2	Putative calcium channel involved in calcium release under hypotonic stress; required for uptake of FAD into endoplasmic reticulum; involved in cell wall maintenance; FLC2 has a paralog, YOR365C, that arose from the whole genome duplication	0.299873	-0.0626269	0.0106548	-0.0674475	0.0831377	-0.155804	-0.347501	0.180395	-0.255534	-0.0242086	-0.11248	0.808403	0.971991	0.9985	0.872145	0.899374	0.763365	0.852291	0.863129	0.895732	0.903529	0.928647	0
TCCCCCAGTTCTTCCTATAT	-	chrI	47068	47090	W396*	G397R	NA	c(NA, -3.649)	3.649	FALSE	neStops	YAL053W	FLC2	Putative calcium channel involved in calcium release under hypotonic stress; required for uptake of FAD into endoplasmic reticulum; involved in cell wall maintenance; FLC2 has a paralog, YOR365C, that arose from the whole genome duplication	0.136824	0.166124	0.338863	-0.133483	-0.168022	0.0928455	-0.0903799	-0.249822	0.456089	-0.10502	0.0104233	0.907111	0.936122	0.97393	0.834241	0.899374	0.828158	0.98997	0.831107	0.59218	0.901092	0.9526	0
TGCGTCCACGCGGCAGCAAT	-	chrI	46613	46635	W244*	NA	NA	NA	NA	FALSE	neStops	YAL053W	FLC2	Putative calcium channel involved in calcium release under hypotonic stress; required for uptake of FAD into endoplasmic reticulum; involved in cell wall maintenance; FLC2 has a paralog, YOR365C, that arose from the whole genome duplication	0.43139	0.353298	0.3379	0.223037	0.21478	0.00502117	0.268693	0.284896	-0.190045	0.266509	-0.0730116	0.524618	0.798144	0.972448	0.760706	0.891921	0.870869	0.925101	0.809904	0.934878	0.901092	0.936086	0
TTCCACCCATTGCTGCCGCG	+	chrI	46608	46630	P238L	P239F	NA	c(-9.958, -10.953)	10.953	FALSE	neProvs	YAL053W	FLC2	Putative calcium channel involved in calcium release under hypotonic stress; required for uptake of FAD into endoplasmic reticulum; involved in cell wall maintenance; FLC2 has a paralog, YOR365C, that arose from the whole genome duplication	0.0950118	0.277804	0.230347	0.110364	-0.206312	-0.100797	0.0570271	0.164083	-0.33238	-0.112658	-0.00537798	0.918433	0.860138	0.984292	0.835544	0.875865	0.801331	0.997766	0.859734	0.780084	0.901092	0.953669	0
AGCTCCCAGCAAGTAACCTG	+	chrI	44000	44022	G340K	NA	NA	-5.997	5.997	FALSE	neProvs	YAL054C	ACS1	Acetyl-coA synthetase isoform; along with Acs2p, acetyl-coA synthetase isoform is the nuclear source of acetyl-coA for histone acetylation; expressed during growth on nonfermentable carbon sources and under aerobic conditions	-0.271604	-0.0492656	0.0521996	-0.29553	-0.119311	-0.0559357	-0.295045	0.191575	0.0841683	-0.273878	-0.275495	0.822395	0.971991	0.995762	0.651299	0.899374	0.845921	0.814465	0.840331	0.948183	0.899577	0.71703	0
CACCAGTGAAATAGTAGCCA	+	chrI	43348	43370	G558S	NA	NA	-6	6	FALSE	neProvs	YAL054C	ACS1	Acetyl-coA synthetase isoform; along with Acs2p, acetyl-coA synthetase isoform is the nuclear source of acetyl-coA for histone acetylation; expressed during growth on nonfermentable carbon sources and under aerobic conditions	-0.0735698	0.0734849	0.00935291	0.19838	0.322872	0.122732	-0.0374407	0.353257	0.363962	-0.140605	-0.203027	0.918895	0.971991	0.9985	0.787036	0.844848	0.781591	0.999238	0.7827	0.84946	0.901092	0.850776	0
CATCATTTGCAAGAACTATT	-	chrI	43412	43434	S531L	NA	NA	-5.977	5.977	FALSE	neProvs	YAL054C	ACS1	Acetyl-coA synthetase isoform; along with Acs2p, acetyl-coA synthetase isoform is the nuclear source of acetyl-coA for histone acetylation; expressed during growth on nonfermentable carbon sources and under aerobic conditions	0.0741942	-0.202409	0.0292553	-0.102805	0.0442404	0.146109	0.00606839	0.143716	0.017555	0.280131	0.0252147	0.911485	0.878625	0.99591	0.812456	0.899374	0.689967	0.999797	0.846141	0.960526	0.787886	0.950209	0
GAATCCGACAACAGCACACT	+	chrI	43196	43218	G608K	NA	NA	-7.986	7.986	FALSE	neProvs	YAL054C	ACS1	Acetyl-coA synthetase isoform; along with Acs2p, acetyl-coA synthetase isoform is the nuclear source of acetyl-coA for histone acetylation; expressed during growth on nonfermentable carbon sources and under aerobic conditions	0.00929729	0.0231488	0.0128425	-0.0969884	0.0901668	-0.125931	0.188327	0.00173404	-0.239006	-0.0284108	-0.263416	0.940823	0.978346	0.9985	0.815179	0.899374	0.724322	0.895996	0.907462	0.82742	0.903529	0.506901	0
GACTTGCCCAAGACAAGATC	-	chrI	43002	43024	P669F	NA	NA	-10.966	10.966	FALSE	neProvs	YAL054C	ACS1	Acetyl-coA synthetase isoform; along with Acs2p, acetyl-coA synthetase isoform is the nuclear source of acetyl-coA for histone acetylation; expressed during growth on nonfermentable carbon sources and under aerobic conditions	-0.147276	-0.27822	0.0506897	-0.128662	-0.000416388	-0.101384	0.163851	0.284507	-0.103726	-0.172873	0.0876845	0.907803	0.88815	0.995762	0.835544	0.923902	0.813808	0.968105	0.813852	0.951669	0.901092	0.935292	0
GAGAGATCGTATCAACGATG	-	chrI	44317	44339	R231C	NA	NA	-7.875	7.875	FALSE	neProvs	YAL054C	ACS1	Acetyl-coA synthetase isoform; along with Acs2p, acetyl-coA synthetase isoform is the nuclear source of acetyl-coA for histone acetylation; expressed during growth on nonfermentable carbon sources and under aerobic conditions	0.0295901	-0.145486	0.246676	0.24129	-0.31573	0.0401902	0.116376	0.121236	0.452206	0.139783	-0.0203871	0.93822	0.961464	0.988598	0.785316	0.883123	0.85927	0.988015	0.878505	0.738365	0.901092	0.95205	0
GTTGCCCAATCCAAATCTCT	+	chrI	44139	44161	W293*	A294T	NA	c(NA, 0.108)	0.108	FALSE	neStops	YAL054C	ACS1	Acetyl-coA synthetase isoform; along with Acs2p, acetyl-coA synthetase isoform is the nuclear source of acetyl-coA for histone acetylation; expressed during growth on nonfermentable carbon sources and under aerobic conditions	0.362791	0.110655	0.183072	0.229135	-0.0545412	0.192421	-0.326228	-0.166141	0.0561383	0.105507	-0.4848	0.783698	0.963212	0.988598	0.778336	0.899374	0.746703	0.918029	0.859931	0.958437	0.901092	0.446531	0
TGAGGAACCATGCATTGTTC	+	chrI	44641	44663	W125*	NA	NA	NA	NA	FALSE	neStops	YAL054C	ACS1	Acetyl-coA synthetase isoform; along with Acs2p, acetyl-coA synthetase isoform is the nuclear source of acetyl-coA for histone acetylation; expressed during growth on nonfermentable carbon sources and under aerobic conditions	-0.134598	0.402248	-0.124567	-0.0294034	NA	0.304531	0.402763	-0.585185	-0.0690237	-0.320956	0.479654	0.918539	0.925329	0.993269	0.892952	NA	0.748397	0.912288	0.67452	0.958437	0.901092	0.623723	0
TTGCCCAATCCAAATCTCTG	+	chrI	44140	44162	W293*	A294T	NA	c(NA, 0.108)	0.108	FALSE	neStops	YAL054C	ACS1	Acetyl-coA synthetase isoform; along with Acs2p, acetyl-coA synthetase isoform is the nuclear source of acetyl-coA for histone acetylation; expressed during growth on nonfermentable carbon sources and under aerobic conditions	0.00272804	0.0217112	0.0960895	-0.0120562	0.149378	-0.663239	0.524964	-0.120229	0.00737513	-0.248676	0.165193	0.942655	0.980103	0.990002	0.892952	0.899374	0.0316131	0.550072	0.875836	0.962971	0.901092	0.87395	1
CATATTGCAAACCAATTTCA	+	chrI	39594	39616	Q115*	NA	NA	NA	NA	FALSE	neStops	YAL056W	GPB2	Multistep regulator of cAMP-PKA signaling; inhibits PKA downstream of Gpa2p and Cyr1p, thereby increasing cAMP dependency; inhibits Ras activity through direct interactions with Ira1p/2p; regulated by G-alpha protein Gpa2p; GPB2 has a paralog, GPB1, that arose from the whole genome duplication	-0.00284473	-0.131322	0.0252735	-0.0226631	-0.00359062	0.0525202	0.0978944	-0.591174	-0.263705	-0.352408	0.0534258	0.942822	0.9567	0.9985	0.892952	0.923352	0.852304	0.989323	0.635417	0.918054	0.874905	0.940685	0
CGACAGACTCTAGATGGTAA	+	chrI	39994	40016	Q247*	T248I	NA	c(NA, 0.001)	0.001	FALSE	neStops	YAL056W	GPB2	Multistep regulator of cAMP-PKA signaling; inhibits PKA downstream of Gpa2p and Cyr1p, thereby increasing cAMP dependency; inhibits Ras activity through direct interactions with Ira1p/2p; regulated by G-alpha protein Gpa2p; GPB2 has a paralog, GPB1, that arose from the whole genome duplication	0.131452	0.00660591	0.109103	0.234837	-0.125831	0.368032	0.0117515	-0.250046	0.239333	0.00399875	-0.00794583	0.877896	0.980348	0.988601	0.578999	0.897754	0.23623	0.999797	0.756619	0.815533	0.911702	0.952099	0
GTCCAATACTTTCCATTCTG	-	chrI	41493	41515	G752R	NA	NA	-5.193	5.193	FALSE	neProvs	YAL056W	GPB2	Multistep regulator of cAMP-PKA signaling; inhibits PKA downstream of Gpa2p and Cyr1p, thereby increasing cAMP dependency; inhibits Ras activity through direct interactions with Ira1p/2p; regulated by G-alpha protein Gpa2p; GPB2 has a paralog, GPB1, that arose from the whole genome duplication	0.178906	0.120113	0.12592	0.00516666	0.0713891	0.223735	-0.183388	-0.417453	0.384231	0.0386083	0.0305082	0.877896	0.9567	0.988601	0.895311	0.899374	0.628397	0.965388	0.719089	0.779305	0.903529	0.950997	0
TTAAGCCAAGAGAAGCCAGT	+	chrI	41302	41324	Q684*	NA	NA	NA	NA	FALSE	neStops	YAL056W	GPB2	Multistep regulator of cAMP-PKA signaling; inhibits PKA downstream of Gpa2p and Cyr1p, thereby increasing cAMP dependency; inhibits Ras activity through direct interactions with Ira1p/2p; regulated by G-alpha protein Gpa2p; GPB2 has a paralog, GPB1, that arose from the whole genome duplication	0.0856747	NA	0.295758	0.244849	0.0285458	0.411882	-0.0538851	NA	0.223214	0.580453	-0.183965	0.928897	NA	0.988598	0.827255	0.9137	0.532523	0.999238	NA	0.937088	0.901092	0.925072	0
ATGCCATTCCCCCATGTAAT	-	chrI	38551	38573	W369*	NA	NA	NA	NA	FALSE	neStops	YAL058W	CNE1	Calnexin; integral membrane ER chaperone involved in folding and quality control of glycoproteins; chaperone activity is inhibited by Mpd1p, with which Cne1p interacts; 24% identical to mammalian calnexin; Ca+ binding not yet shown in yeast	-0.0652171	-0.136482	0.0259647	-0.466522	0.0312752	-0.0692842	0.0586231	0.284948	-0.0614606	-0.225894	-0.53178	0.922292	0.9567	0.9985	0.538883	0.9137	0.842963	0.999238	0.82496	0.958329	0.901092	0.319476	0
CATCCGAATCCCAGATCCTG	+	chrI	38249	38271	R264*	NA	NA	NA	NA	FALSE	neStops	YAL058W	CNE1	Calnexin; integral membrane ER chaperone involved in folding and quality control of glycoproteins; chaperone activity is inhibited by Mpd1p, with which Cne1p interacts; 24% identical to mammalian calnexin; Ca+ binding not yet shown in yeast	-0.0865791	0.0815344	0.157947	0.000238964	-0.00667022	-0.100016	-0.315002	-0.200353	-0.131795	-0.277706	-0.123416	0.918539	0.968562	0.986573	0.90331	0.921745	0.817248	0.855798	0.835354	0.937088	0.885443	0.910949	0
TGTCCAGTACGAAATTAAGT	+	chrI	37799	37821	Q114*	NA	NA	NA	NA	FALSE	neStops	YAL058W	CNE1	Calnexin; integral membrane ER chaperone involved in folding and quality control of glycoproteins; chaperone activity is inhibited by Mpd1p, with which Cne1p interacts; 24% identical to mammalian calnexin; Ca+ binding not yet shown in yeast	-0.185334	0.192012	0.272811	0.307074	0.310104	0.144732	0.00896524	0.175824	0.0285704	-0.403586	-0.236512	0.877896	0.925329	0.983555	0.650219	0.814205	0.785358	0.999797	0.86479	0.959711	0.793967	0.853288	0
ATTCAAAATACAAGAAAGGC	+	chrI	36917	36939	Q138*	NA	NA	NA	NA	FALSE	neStops	YAL059W	ECM1	Pre-ribosomal factor involved in 60S ribosomal protein subunit export; associates with the pre-60S particle; shuttles between the nucleus and cytoplasm	NA	-0.0396161	-1.14276	0.172435	-1.33474	-0.501382	NA	0.43857	NA	NA	-0.758716	NA	0.979575	0.802356	0.851342	0.0840118	0.589951	NA	0.831107	NA	NA	0.379993	0
AGAAATCCAAACCGACGATG	+	chrI	35217	35239	Q24*	NA	NA	NA	NA	FALSE	neStops	YAL060W	BDH1	NAD-dependent (R,R)-butanediol dehydrogenase; catalyzes oxidation of (R,R)-2,3-butanediol to (3R)-acetoin, oxidation of meso-butanediol to (3S)-acetoin, and reduction of acetoin; enhances use of 2,3-butanediol as an aerobic carbon source	0.233372	0.100507	-0.147918	0.239587	0.130802	0.284756	0.114317	-0.27228	0.123667	0.204958	-0.139404	0.836857	0.957671	0.988601	0.707908	0.899374	0.578796	0.979418	0.804604	0.938351	0.901092	0.921782	0
CTAGTCCTACAAAACCGGCG	-	chrI	35550	35572	G138K	NA	NA	-7.971	7.971	FALSE	neProvs	YAL060W	BDH1	NAD-dependent (R,R)-butanediol dehydrogenase; catalyzes oxidation of (R,R)-2,3-butanediol to (3R)-acetoin, oxidation of meso-butanediol to (3S)-acetoin, and reduction of acetoin; enhances use of 2,3-butanediol as an aerobic carbon source	-0.0523986	-0.112384	0.00343376	0.094087	0.0941915	-0.166732	-0.122429	0.0130769	-0.0337716	-0.000180594	0.104036	0.921387	0.951573	0.998694	0.842018	0.899374	0.707698	0.970385	0.903768	0.959205	0.919691	0.921782	0
GGTAAGCAAAGGATTGAGGA	+	chrI	36190	36212	Q348*	NA	NA	NA	NA	FALSE	neStops	YAL060W	BDH1	NAD-dependent (R,R)-butanediol dehydrogenase; catalyzes oxidation of (R,R)-2,3-butanediol to (3R)-acetoin, oxidation of meso-butanediol to (3S)-acetoin, and reduction of acetoin; enhances use of 2,3-butanediol as an aerobic carbon source	-0.332065	NA	NA	0.0841985	NA	NA	0.0931697	-0.108558	-0.604794	0.0822373	-0.000789533	0.877896	NA	NA	0.882396	NA	NA	0.997292	0.89114	0.779305	0.903529	0.954412	0
GGCCCATCGCCTGTGGCAAT	-	chrI	33642	33664	M71I	G72S	NA	c(-3.359, -5.988)	5.988	FALSE	neProvs	YAL061W	BDH2	Putative medium-chain alcohol dehydrogenase with similarity to BDH1; transcription induced by constitutively active PDR1 and PDR3	0.129803	-0.178343	0.247	-0.016885	0.0271655	0.381377	0.0459657	-0.197823	0.10112	0.0890548	0.0641805	0.91324	0.936122	0.983555	0.892952	0.9137	0.4968	0.999238	0.855324	0.944549	0.901092	0.939606	0
ACCTTGCCATCATTGGTCAA	+	chrI	32854	32876	P432L	NA	NA	-9.15	9.15	FALSE	neProvs	YAL062W	GDH3	NADP(+)-dependent glutamate dehydrogenase; synthesizes glutamate from ammonia and alpha-ketoglutarate; rate of alpha-ketoglutarate utilization differs from Gdh1p; expression regulated by nitrogen and carbon sources; GDH3 has a paralog, GDH1, that arose from the whole genome duplication	-0.121655	0.0393907	0.213796	-0.138692	0.181986	-0.302181	0.189844	-0.229282	-0.121017	0.263305	-0.0272564	0.906143	0.974559	0.983555	0.824233	0.891921	0.507267	0.921055	0.809904	0.937088	0.899577	0.950209	0
AGGCCGGAGGCCACCGGGTT	+	chrI	32134	32156	P191L	NA	NA	-9.083	9.083	FALSE	neProvs	YAL062W	GDH3	NADP(+)-dependent glutamate dehydrogenase; synthesizes glutamate from ammonia and alpha-ketoglutarate; rate of alpha-ketoglutarate utilization differs from Gdh1p; expression regulated by nitrogen and carbon sources; GDH3 has a paralog, GDH1, that arose from the whole genome duplication	0.2469	-0.221182	0.418923	0.00528046	-0.110696	0.0558031	-0.0441271	0.0328861	0.00901519	0.212892	0.0146	0.783609	0.873207	0.767411	0.894718	0.899374	0.842952	0.999238	0.897447	0.962502	0.895766	0.95205	0
CTTAACGCCAGATGCCACTA	-	chrI	32546	32568	G332D	V333I	NA	c(-6.462, -0.505)	6.462	FALSE	neProvs	YAL062W	GDH3	NADP(+)-dependent glutamate dehydrogenase; synthesizes glutamate from ammonia and alpha-ketoglutarate; rate of alpha-ketoglutarate utilization differs from Gdh1p; expression regulated by nitrogen and carbon sources; GDH3 has a paralog, GDH1, that arose from the whole genome duplication	0.428531	0.24653	-0.0475031	0.0166036	-0.0276014	0.199762	-0.154778	-0.153991	0.0715062	0.205975	0.137551	0.0565677	0.815975	0.995762	0.892952	0.9137	0.568407	0.941251	0.83938	0.944092	0.88859	0.87395	0
GCCACCCAAAACGAGGTCAG	+	chrI	32509	32531	T316I	Q317*	NA	c(-5.539, NA)	5.539	FALSE	neStops	YAL062W	GDH3	NADP(+)-dependent glutamate dehydrogenase; synthesizes glutamate from ammonia and alpha-ketoglutarate; rate of alpha-ketoglutarate utilization differs from Gdh1p; expression regulated by nitrogen and carbon sources; GDH3 has a paralog, GDH1, that arose from the whole genome duplication	NA	0.698934	-0.0745379	0.127672	0.174608	-0.594237	NA	NA	NA	0.134235	-0.257562	NA	0.787152	0.995762	0.865382	0.899374	0.506659	NA	NA	NA	0.901092	0.898132	0
GGCGAGCAAGAAGTGGCTCA	+	chrI	31729	31751	Q57*	NA	NA	NA	NA	FALSE	neStops	YAL062W	GDH3	NADP(+)-dependent glutamate dehydrogenase; synthesizes glutamate from ammonia and alpha-ketoglutarate; rate of alpha-ketoglutarate utilization differs from Gdh1p; expression regulated by nitrogen and carbon sources; GDH3 has a paralog, GDH1, that arose from the whole genome duplication	-0.331088	0.0161264	NA	-0.447995	NA	-0.252722	NA	NA	0.205585	NA	-0.145789	0.877896	0.980348	NA	0.741083	NA	0.72752	NA	NA	0.940889	NA	0.924619	0
TCATTCAATTCAGGGTCACG	+	chrI	31694	31716	Q45*	NA	NA	NA	NA	FALSE	neStops	YAL062W	GDH3	NADP(+)-dependent glutamate dehydrogenase; synthesizes glutamate from ammonia and alpha-ketoglutarate; rate of alpha-ketoglutarate utilization differs from Gdh1p; expression regulated by nitrogen and carbon sources; GDH3 has a paralog, GDH1, that arose from the whole genome duplication	-0.0201895	0.0591211	-0.000147003	-0.0953306	-0.0604901	0.0176223	-0.426166	0.0691308	-0.0473283	0.202411	-0.166493	0.939576	0.974472	0.999686	0.854356	0.899374	0.86597	0.819557	0.890397	0.959205	0.901092	0.898132	0
TGTCCTCAAGAAGATTTATA	-	chrI	27661	27683	P97F	Q98*	NA	c(-5.507, NA)	5.507	FALSE	neStops	YAL063C	FLO9	Lectin-like protein with similarity to Flo1p; thought to be expressed and involved in flocculation	-0.00632828	-0.0473209	0.779465	0.48022	0.380733	0.175955	-0.185449	0.378147	0.0142125	-0.451192	0.383241	0.942278	0.977646	0.736634	0.527543	0.875057	0.791464	0.978357	0.827894	0.962502	0.859333	0.706526	0
ACACCAGCAAGTAGCATAAT	-	chrI	11680	11702	P85L	A86V	NA	c(-7.631, -3.067)	7.631	FALSE	neProvs	YAL065C	YAL065C	Putative protein of unknown function; shows sequence similarity to FLO1 and other flocculins	-0.108186	0.00480898	-0.164648	0.0779825	-0.0332206	-0.0584571	0.0558318	-0.157691	0.0150884	-0.178833	0.0607947	0.907801	0.980348	0.986305	0.850263	0.9137	0.828577	0.996942	0.853439	0.961753	0.901092	0.936086	0
GACCAACATAAGTCGAGGCT	+	chrI	8373	8395	C213Y	W214*	NA	c(-6.649, NA)	6.649	FALSE	neStops	YAL067C	SEO1	Putative permease; member of the allantoate transporter subfamily of the major facilitator superfamily; mutation confers resistance to ethionine sulfoxide	0.412804	-0.15573	-0.191817	-0.309706	-0.0207072	0.15857	0.836535	-0.459788	0.206945	-0.130043	-0.627433	0.797293	0.956706	0.988601	0.792922	0.914446	0.799435	0.15721	0.750551	0.940889	0.901092	0.446183	0
TGGCTCAATCATCTACCGCA	-	chrI	7472	7494	A509V	Q510*	NA	c(-3.78, NA)	3.78	FALSE	neStops	YAL067C	SEO1	Putative permease; member of the allantoate transporter subfamily of the major facilitator superfamily; mutation confers resistance to ethionine sulfoxide	NA	-0.0951861	NA	0.761372	NA	0.413	0.0970887	0.464078	NA	NA	0.00499051	NA	0.971991	NA	0.517578	NA	0.693457	0.999238	0.821474	NA	NA	0.953669	0
ATCAACCAGCCACCAGCTTC	+	chrI	154369	154391	W117*	NA	NA	NA	NA	FALSE	neStops	YAR002C-A	ERP1	Member of the p24 family involved in ER to Golgi transport; role in misfolded protein quality control; forms heterotrimeric complex with Erp2p, Emp24p, and Erv25p; localized to COPII-coated vesicles; ERP1 has a paralog, ERP6, that arose from the whole genome duplication	-0.0597724	-0.0087316	0.297945	0.0437632	-0.200397	-0.149819	-0.549067	-0.302944	0.184556	0.446142	-0.0910079	0.93228	0.980348	0.986573	0.892952	0.897754	0.810758	0.73886	0.846661	0.937088	0.885443	0.936086	0
TGTATTCAGCCCGAAGCTGG	-	chrI	154378	154400	Q111*	NA	NA	NA	NA	FALSE	neStops	YAR002C-A	ERP1	Member of the p24 family involved in ER to Golgi transport; role in misfolded protein quality control; forms heterotrimeric complex with Erp2p, Emp24p, and Erv25p; localized to COPII-coated vesicles; ERP1 has a paralog, ERP6, that arose from the whole genome duplication	-0.000530081	-0.304718	-0.0747624	0.667001	-0.0998531	0.102734	0.307989	0.297172	0.0905427	0.177137	-0.29254	0.943928	0.907928	0.995762	0.242075	0.899374	0.83647	0.94611	0.827865	0.957492	0.901092	0.850156	0
CCTCAAAAAAGTTCATCGAA	+	chrI	153637	153659	Q462*	NA	NA	NA	NA	FALSE	neStops	YAR002W	NUP60	FG-nucleoporin component of central core of the nuclear pore complex; contributes directly to nucleocytoplasmic transport and maintenance of the nuclear pore complex (NPC) permeability barrier and is involved in gene tethering at the nuclear periphery; relocalizes to the cytosol in response to hypoxia; both NUP1 and NUP60 are homologous to human NUP153	0.192503	-0.00814687	0.334006	0.0322179	0.0331856	-0.0558355	-0.11115	0.0509984	0.0381327	-0.181949	-0.355773	0.877896	0.980348	0.954291	0.891311	0.9137	0.84735	0.986028	0.894363	0.959205	0.901092	0.675515	0
CGACCAGTCGCTTATCTTGA	+	chrI	152760	152782	Q170*	NA	NA	NA	NA	FALSE	neStops	YAR002W	NUP60	FG-nucleoporin component of central core of the nuclear pore complex; contributes directly to nucleocytoplasmic transport and maintenance of the nuclear pore complex (NPC) permeability barrier and is involved in gene tethering at the nuclear periphery; relocalizes to the cytosol in response to hypoxia; both NUP1 and NUP60 are homologous to human NUP153	-0.106694	-0.149067	0.0813157	-0.0646743	-0.0356892	0.15429	-0.037724	-0.0389852	-0.46045	0.0698989	-0.142042	0.918585	0.9567	0.995762	0.882585	0.9137	0.77789	0.999238	0.898013	0.779305	0.901092	0.920051	0
TAAGCAGCTAGGAAATGGCT	+	chrI	153807	153829	Q519*	NA	NA	NA	NA	FALSE	neStops	YAR002W	NUP60	FG-nucleoporin component of central core of the nuclear pore complex; contributes directly to nucleocytoplasmic transport and maintenance of the nuclear pore complex (NPC) permeability barrier and is involved in gene tethering at the nuclear periphery; relocalizes to the cytosol in response to hypoxia; both NUP1 and NUP60 are homologous to human NUP153	0.0888537	0.147426	-0.0484727	-0.414804	NA	NA	-0.639256	1.03909	NA	NA	NA	0.93135	0.971991	0.9985	0.718029	NA	NA	0.819557	0.454925	NA	NA	NA	0
TTTCAAAACGTTCCTGAACA	+	chrI	153250	153272	Q333*	NA	NA	NA	NA	FALSE	neStops	YAR002W	NUP60	FG-nucleoporin component of central core of the nuclear pore complex; contributes directly to nucleocytoplasmic transport and maintenance of the nuclear pore complex (NPC) permeability barrier and is involved in gene tethering at the nuclear periphery; relocalizes to the cytosol in response to hypoxia; both NUP1 and NUP60 are homologous to human NUP153	NA	-0.26247	NA	-0.111644	NA	NA	-0.0220519	0.164785	0.444415	NA	0.492784	NA	0.9567	NA	0.881636	NA	NA	0.999797	0.88281	0.906685	NA	0.811866	0
AGAGAGCAATATGATGTTAG	+	chrI	156190	156212	Q398*	NA	NA	NA	NA	FALSE	neStops	YAR003W	SWD1	Subunit of the COMPASS (Set1C) complex; COMPASS methylates histone H3 on lysine 4 and is required in transcriptional silencing near telomeres; WD40 beta propeller superfamily member with similarity to mammalian Rbbp7	-0.192359	-0.140368	-0.0776766	-0.0252723	NA	0.44801	0.306995	-0.00839778	-0.399549	-0.0298856	-0.0453725	0.907801	0.957671	0.995866	0.892952	NA	0.496313	0.957598	0.907462	0.888757	0.903529	0.950364	0
AGCCATTGGCAACCCCAAAT	-	chrI	155350	155372	W122*	NA	NA	NA	NA	FALSE	neStops	YAR003W	SWD1	Subunit of the COMPASS (Set1C) complex; COMPASS methylates histone H3 on lysine 4 and is required in transcriptional silencing near telomeres; WD40 beta propeller superfamily member with similarity to mammalian Rbbp7	-0.450707	-0.0262918	-0.0579783	0.140214	-0.00290515	0.0806062	-0.00248407	-0.674578	0.225543	0.107067	-0.0301516	0.554679	0.980103	0.995762	0.834241	0.923365	0.824792	0.999797	0.336745	0.921009	0.901092	0.950642	0
GCAGCAAGGACTAGAACAAG	+	chrI	156141	156163	Q381*	NA	NA	NA	NA	FALSE	neStops	YAR003W	SWD1	Subunit of the COMPASS (Set1C) complex; COMPASS methylates histone H3 on lysine 4 and is required in transcriptional silencing near telomeres; WD40 beta propeller superfamily member with similarity to mammalian Rbbp7	0.386579	0.0981192	-0.339815	NA	NA	0.332998	0.0610493	NA	NA	0.177614	0.263636	0.850929	0.971991	0.986305	NA	NA	0.764318	0.999238	NA	NA	0.901092	0.898132	0
TTCAGGCCTATTTGTGTCCC	+	chrI	155176	155198	P60F	NA	NA	-8.247	8.247	FALSE	neProvs	YAR003W	SWD1	Subunit of the COMPASS (Set1C) complex; COMPASS methylates histone H3 on lysine 4 and is required in transcriptional silencing near telomeres; WD40 beta propeller superfamily member with similarity to mammalian Rbbp7	0.0073298	0.345749	0.403215	-0.464896	0.557239	0.0231551	0.450061	-0.259993	-0.193638	0.692038	0.192141	0.942278	0.898131	0.903975	0.604013	0.819629	0.865699	0.82055	0.846661	0.937088	0.738335	0.905154	0
AATTCCAACGTAGACGTCCT	-	chrI	157658	157680	S315F	NA	NA	-5.068	5.068	TRUE	eProvs	YAR007C	RFA1	Subunit of heterotrimeric Replication Protein A (RPA); RPA is a highly conserved single-stranded DNA binding protein involved in DNA replication, repair, and recombination; RPA protects against inappropriate telomere recombination, and upon telomere uncapping, prevents cell proliferation by a checkpoint-independent pathway; role in DNA catenation/decatenation pathway of chromosome disentangling; …	-0.342477	-0.035197	0.135541	-0.0561082	0.105787	-0.185136	-0.147514	-0.082049	0.185455	0.188707	-0.027454	0.448137	0.974472	0.988601	0.871802	0.899374	0.672137	0.95609	0.879427	0.911993	0.901092	0.949218	0
ACACCCTTATGAACTGAATT	-	chrI	157779	157801	P275F	NA	NA	-10.653	10.653	TRUE	eProvs	YAR007C	RFA1	Subunit of heterotrimeric Replication Protein A (RPA); RPA is a highly conserved single-stranded DNA binding protein involved in DNA replication, repair, and recombination; RPA protects against inappropriate telomere recombination, and upon telomere uncapping, prevents cell proliferation by a checkpoint-independent pathway; role in DNA catenation/decatenation pathway of chromosome disentangling; …	-0.149763	0.13197	0.283001	-0.230717	0.166072	0.103114	0.446494	0.0222111	-0.563818	0.0741231	0.000554957	0.907803	0.956706	0.983555	0.769055	0.898896	0.826891	0.810827	0.903768	0.763087	0.901092	0.954369	0
ATTACAATTCTCATTAGAAC	+	chrI	157144	157166	C491Y	NA	NA	-10.919	10.919	TRUE	eProvs	YAR007C	RFA1	Subunit of heterotrimeric Replication Protein A (RPA); RPA is a highly conserved single-stranded DNA binding protein involved in DNA replication, repair, and recombination; RPA protects against inappropriate telomere recombination, and upon telomere uncapping, prevents cell proliferation by a checkpoint-independent pathway; role in DNA catenation/decatenation pathway of chromosome disentangling; …	-0.136737	NA	NA	0.0699425	0.564293	-0.58152	-0.013722	NA	0.0888246	-0.483131	NA	0.918539	NA	NA	0.884721	0.489121	0.582382	0.999797	NA	0.957553	0.892226	NA	0
GGTTCTGTTGCTGCCATTAA	-	chrI	157484	157506	S373F	NA	NA	-5.392	5.392	TRUE	eProvs	YAR007C	RFA1	Subunit of heterotrimeric Replication Protein A (RPA); RPA is a highly conserved single-stranded DNA binding protein involved in DNA replication, repair, and recombination; RPA protects against inappropriate telomere recombination, and upon telomere uncapping, prevents cell proliferation by a checkpoint-independent pathway; role in DNA catenation/decatenation pathway of chromosome disentangling; …	-0.154522	-0.0526233	-0.0686921	-0.109817	2.96347e-05	-0.105293	0.0211614	-0.338665	0.210106	0.371301	0.30424	0.895646	0.973678	0.995762	0.848774	0.924102	0.811518	0.999797	0.765928	0.921009	0.882917	0.753361	0
CACCACTTATCATGGATATT	-	chrI	159667	159689	S240N	G241S	NA	c(-0.2, -5.5)	5.5	TRUE	eProvs	YAR008W	SEN34	Subunit of the tRNA splicing endonuclease; tRNA splicing endonuclease (Sen complex) is composed of Sen2p, Sen15p, Sen34p, and Sen54p; Sen complex also cleaves the CBP1 mRNA at the mitochondrial surface; Sen34p contains the active site for tRNA 3' splice site cleavage and has similarity to Sen2p and to Archaeal tRNA splicing endonuclease	-0.012186	-0.401799	-0.432817	-0.016087	0.0552247	0.119895	-0.34817	-0.166859	0.0453845	-0.0223717	-0.0992282	0.941197	0.755914	0.937192	0.892952	0.899374	0.816411	0.855798	0.864156	0.959199	0.903529	0.929057	0
CCCACCAAAACGTCCACCTG	-	chrI	159555	159577	G203N	NA	NA	-6	6	TRUE	eProvs	YAR008W	SEN34	Subunit of the tRNA splicing endonuclease; tRNA splicing endonuclease (Sen complex) is composed of Sen2p, Sen15p, Sen34p, and Sen54p; Sen complex also cleaves the CBP1 mRNA at the mitochondrial surface; Sen34p contains the active site for tRNA 3' splice site cleavage and has similarity to Sen2p and to Archaeal tRNA splicing endonuclease	-0.512533	-0.730937	-0.0857021	-0.102306	0.0392994	0.0273534	-0.119954	-0.0529201	-0.328887	-0.269821	0.0994121	0.0113272	0.000891364	0.990002	0.834712	0.899374	0.857471	0.964397	0.886991	0.653771	0.787886	0.911956	2
GAACGACTGTGAAAAAACTT	+	chrI	159699	159721	T246M	T247I	NA	c(-6, -3)	6	TRUE	eProvs	YAR008W	SEN34	Subunit of the tRNA splicing endonuclease; tRNA splicing endonuclease (Sen complex) is composed of Sen2p, Sen15p, Sen34p, and Sen54p; Sen complex also cleaves the CBP1 mRNA at the mitochondrial surface; Sen34p contains the active site for tRNA 3' splice site cleavage and has similarity to Sen2p and to Archaeal tRNA splicing endonuclease	0.0992827	-0.232941	-0.449989	-0.42917	NA	0.0657294	0.397867	-0.0365116	0.435734	-0.147535	0.327603	0.921387	0.925329	0.983555	0.653129	NA	0.85452	0.855798	0.899491	0.814204	0.901092	0.839737	0
TTCCCACCAAAACGTCCACC	-	chrI	159557	159579	G203N	G204K	NA	c(-6, -6.767)	6.767	TRUE	eProvs	YAR008W	SEN34	Subunit of the tRNA splicing endonuclease; tRNA splicing endonuclease (Sen complex) is composed of Sen2p, Sen15p, Sen34p, and Sen54p; Sen complex also cleaves the CBP1 mRNA at the mitochondrial surface; Sen34p contains the active site for tRNA 3' splice site cleavage and has similarity to Sen2p and to Archaeal tRNA splicing endonuclease	-0.664696	-0.614115	-0.457145	-0.234529	-0.109861	-0.682059	-0.449187	0.0615402	-0.385872	-0.139047	-0.106236	0.000806478	0.0135052	0.396936	0.60903	0.899374	0.000114346	0.31383	0.884896	0.523958	0.901092	0.904044	3
CTTATCGCCGCCAAGAGAAC	-	chrI	168094	168116	S254L	P255S	NA	c(-2.628, -7.86)	7.86	FALSE	neProvs	YAR014C	BUD14	Protein involved in bud-site selection; Bud14p-Glc7p complex is a cortical regulator of dynein; forms a complex with Kel1p and Kel2p that regulates Bnr1p (formin) to affect actin cable assembly, cytokinesis, and polarized growth; diploid mutants display a random budding pattern instead of the wild-type bipolar pattern; relative distribution to the nucleus increases upon DNA replication stress	-0.0739289	0.0732245	0.142068	0.416252	0.110468	0.0369213	-0.0239977	0.208126	0.188436	0.0295409	-0.173476	0.918585	0.971991	0.988601	0.412187	0.899374	0.858532	0.999797	0.840537	0.922535	0.903529	0.898132	0
GAATGATCCAACCCTAATAG	-	chrI	168700	168722	P53S	NA	NA	-6.993	6.993	FALSE	neProvs	YAR014C	BUD14	Protein involved in bud-site selection; Bud14p-Glc7p complex is a cortical regulator of dynein; forms a complex with Kel1p and Kel2p that regulates Bnr1p (formin) to affect actin cable assembly, cytokinesis, and polarized growth; diploid mutants display a random budding pattern instead of the wild-type bipolar pattern; relative distribution to the nucleus increases upon DNA replication stress	-0.0517184	-0.0840362	0.0927953	0.145499	-0.158022	0.460028	0.329768	0.107204	0.1691	-0.136977	0.0538381	0.928899	0.96022	0.990002	0.799114	0.897067	0.134495	0.819557	0.872795	0.921143	0.901092	0.936086	0
TTTCACCGTCGTCGTCAGAA	-	chrI	167222	167244	S544L	P545L	NA	c(-5.767, -9.533)	9.533	FALSE	neProvs	YAR014C	BUD14	Protein involved in bud-site selection; Bud14p-Glc7p complex is a cortical regulator of dynein; forms a complex with Kel1p and Kel2p that regulates Bnr1p (formin) to affect actin cable assembly, cytokinesis, and polarized growth; diploid mutants display a random budding pattern instead of the wild-type bipolar pattern; relative distribution to the nucleus increases upon DNA replication stress	0.603972	NA	NA	-0.0242904	NA	NA	NA	NA	NA	0.0838748	NA	0.796721	NA	NA	0.892952	NA	NA	NA	NA	NA	0.903529	NA	0
TTTGTCCATTCTGACGACGA	+	chrI	167217	167239	W550*	NA	NA	NA	NA	FALSE	neStops	YAR014C	BUD14	Protein involved in bud-site selection; Bud14p-Glc7p complex is a cortical regulator of dynein; forms a complex with Kel1p and Kel2p that regulates Bnr1p (formin) to affect actin cable assembly, cytokinesis, and polarized growth; diploid mutants display a random budding pattern instead of the wild-type bipolar pattern; relative distribution to the nucleus increases upon DNA replication stress	0.0550996	-0.092264	-0.117519	-0.0538506	-0.078616	-0.25998	0.0627757	0.447384	-0.111004	-0.0484184	-0.0804865	0.927181	0.968037	0.989391	0.879883	0.899374	0.556445	0.99589	0.633991	0.937088	0.901092	0.933748	0
ACTTTACCTCTGGCCACCAA	-	chrI	169411	169433	G18N	NA	NA	-5.938	5.938	FALSE	neProvs	YAR015W	ADE1	N-succinyl-5-aminoimidazole-4-carboxamide ribotide synthetase; required for 'de novo' purine nucleotide biosynthesis; red pigment accumulates in mutant cells deprived of adenine; protein abundance increases in response to DNA replication stress	-0.286655	0.00383647	-0.034813	0.342911	-0.167723	0.220716	0.406663	0.141545	-0.098565	-0.232604	-0.0420643	0.825229	0.980348	0.997312	0.600003	0.899374	0.697601	0.819557	0.86675	0.949273	0.901092	0.945295	0
ATGTTCACCTTGTTCAGCCT	-	chrI	169862	169884	G168D	E169K	NA	c(-6.942, -2.949)	6.942	FALSE	neProvs	YAR015W	ADE1	N-succinyl-5-aminoimidazole-4-carboxamide ribotide synthetase; required for 'de novo' purine nucleotide biosynthesis; red pigment accumulates in mutant cells deprived of adenine; protein abundance increases in response to DNA replication stress	-0.0737938	0.0122007	-0.126295	0.156095	0.117692	-0.24113	0.0668582	-0.398363	0.321999	0.177131	-0.0424985	0.9186	0.980103	0.988601	0.827255	0.899374	0.621552	0.995851	0.659793	0.84946	0.901092	0.941503	0
GAACCAGAACTCTGACAGTT	-	chrI	169547	169569	W64*	NA	NA	NA	NA	FALSE	neStops	YAR015W	ADE1	N-succinyl-5-aminoimidazole-4-carboxamide ribotide synthetase; required for 'de novo' purine nucleotide biosynthesis; red pigment accumulates in mutant cells deprived of adenine; protein abundance increases in response to DNA replication stress	NA	0.0489233	-0.18254	0.0679252	0.152362	-0.405511	NA	0.115047	0.17688	NA	0.363933	NA	0.978346	0.990002	0.882585	0.899374	0.585564	NA	0.891371	0.937088	NA	0.87395	0
GCAGACACTAAATTCGAATT	+	chrI	170014	170036	T216I	NA	NA	-5.954	5.954	FALSE	neProvs	YAR015W	ADE1	N-succinyl-5-aminoimidazole-4-carboxamide ribotide synthetase; required for 'de novo' purine nucleotide biosynthesis; red pigment accumulates in mutant cells deprived of adenine; protein abundance increases in response to DNA replication stress	0.052899	-0.061128	-0.0470267	0.176404	-0.00097819	-0.0796757	-0.164615	-0.17192	0.151534	0.183736	0.13415	0.924993	0.971991	0.995762	0.734347	0.92372	0.80951	0.938944	0.840331	0.925007	0.901092	0.898132	0
GCCCAGGCCGCTGAGCTGGT	+	chrI	169903	169925	Q178*	A179V	NA	c(NA, -3.45)	3.45	FALSE	neStops	YAR015W	ADE1	N-succinyl-5-aminoimidazole-4-carboxamide ribotide synthetase; required for 'de novo' purine nucleotide biosynthesis; red pigment accumulates in mutant cells deprived of adenine; protein abundance increases in response to DNA replication stress	-0.0793735	-0.102149	-0.126803	-0.256916	-0.0391452	0.645833	-0.0454885	0.204313	-0.0260026	-0.260886	-0.401526	0.929824	0.971991	0.993422	0.80082	0.9137	0.475701	0.999238	0.86479	0.961349	0.901092	0.702414	0
TGACCAAACTGTCAGAGTTC	+	chrI	169544	169566	T58I	NA	NA	-5.95	5.95	FALSE	neProvs	YAR015W	ADE1	N-succinyl-5-aminoimidazole-4-carboxamide ribotide synthetase; required for 'de novo' purine nucleotide biosynthesis; red pigment accumulates in mutant cells deprived of adenine; protein abundance increases in response to DNA replication stress	0.310199	-0.0373792	-0.0292588	-0.0150312	0.0287051	0.0921608	0.114354	-0.502825	0.120106	-0.0576578	0.247933	0.808403	0.977007	0.998202	0.892952	0.9137	0.815791	0.975412	0.627375	0.937088	0.901092	0.792087	0
AGTCAAGTTGTGGTAAAGTT	-	chrI	171015	171037	Q224*	NA	NA	NA	NA	FALSE	neStops	YAR018C	KIN3	Nonessential serine/threonine protein kinase; possible role in DNA damage response; influences tolerance to high levels of ethanol	0.580845	NA	NA	0.270645	-0.361948	NA	-0.345438	0.881182	0.303932	0.518477	0.036005	0.783226	NA	NA	0.824054	0.898962	NA	0.946389	0.704645	0.924709	0.901092	0.951814	0
CTACAAACTAAGATTAAAAA	-	chrI	170796	170818	Q297*	T298I	NA	c(NA, -2.697)	2.697	FALSE	neStops	YAR018C	KIN3	Nonessential serine/threonine protein kinase; possible role in DNA damage response; influences tolerance to high levels of ethanol	-0.474906	0.18441	-0.194447	0.295516	0.257282	0.17854	0.0583699	0.0219533	-0.0599222	-0.154956	-0.117514	0.407593	0.936122	0.986573	0.634587	0.863138	0.736402	0.999238	0.902804	0.957553	0.901092	0.921782	0
GGAACAATTTACCCAGGCAG	-	chrI	170518	170540	Q390*	NA	NA	NA	NA	FALSE	neStops	YAR018C	KIN3	Nonessential serine/threonine protein kinase; possible role in DNA damage response; influences tolerance to high levels of ethanol	0.0505855	-0.246024	0.00210877	0.1534	NA	0.175583	-0.0786093	-0.0698475	0.062389	0.141028	-0.19346	0.933108	0.936122	0.999413	0.846175	NA	0.814918	0.999238	0.892436	0.959205	0.901092	0.898132	0
GTCCCTGAGTATTACTCTAG	-	chrI	170760	170782	P309F	NA	NA	-10.011	10.011	FALSE	neProvs	YAR018C	KIN3	Nonessential serine/threonine protein kinase; possible role in DNA damage response; influences tolerance to high levels of ethanol	0.23915	0.0771673	0.0484241	-0.0160318	0.180914	0.18221	0.035372	-0.0206467	-0.141729	0.080092	-0.050669	0.761042	0.966692	0.995762	0.892952	0.883123	0.666551	0.999238	0.900885	0.932346	0.901092	0.937925	0
GTGACCAGATGTCGGATAGT	+	chrI	170884	170906	W272*	NA	NA	NA	NA	FALSE	neStops	YAR018C	KIN3	Nonessential serine/threonine protein kinase; possible role in DNA damage response; influences tolerance to high levels of ethanol	-0.152416	0.227454	-0.349672	0.837199	0.295535	0.355106	0.143778	0.431394	-0.426647	0.560875	-0.204404	0.918539	0.951737	0.986305	0.243332	0.884211	0.602146	0.98997	0.819109	0.879979	0.704842	0.898523	0
TACCAAGTTCTCGAAGAAAT	-	chrI	171609	171631	Q26*	NA	NA	NA	NA	FALSE	neStops	YAR018C	KIN3	Nonessential serine/threonine protein kinase; possible role in DNA damage response; influences tolerance to high levels of ethanol	-0.141904	0.0588246	NA	-0.125547	NA	NA	-0.464844	0.238939	NA	NA	NA	0.919568	0.978346	NA	0.880175	NA	NA	0.906672	0.8683	NA	NA	NA	0
TCCCTGAGTATTACTCTAGA	-	chrI	170759	170781	P309L	NA	NA	-9.1	9.1	FALSE	neProvs	YAR018C	KIN3	Nonessential serine/threonine protein kinase; possible role in DNA damage response; influences tolerance to high levels of ethanol	0.127524	0.303264	0.136108	-0.0184413	0.0315464	0.113373	-0.267139	-0.250487	-0.303922	-0.104794	0.027462	0.911361	0.873207	0.990002	0.892952	0.9137	0.807693	0.897762	0.826145	0.907532	0.901092	0.951527	0
TGACCAGATGTCGGATAGTG	+	chrI	170885	170907	W272*	NA	NA	NA	NA	FALSE	neStops	YAR018C	KIN3	Nonessential serine/threonine protein kinase; possible role in DNA damage response; influences tolerance to high levels of ethanol	0.2839	NA	0.934578	0.305758	0.347219	NA	0.0294142	0.546929	NA	0.579728	-0.228426	0.852832	NA	0.398986	0.73121	0.871897	NA	0.999797	0.804604	NA	0.787886	0.898132	0
TGGAACAATATTCCATATAA	+	chrI	171382	171404	C106Y	NA	NA	-11	11	FALSE	neProvs	YAR018C	KIN3	Nonessential serine/threonine protein kinase; possible role in DNA damage response; influences tolerance to high levels of ethanol	0.546852	0.524971	0.098191	0.484461	0.0634638	0.144012	0.0659847	-0.160216	-0.064979	-0.164006	0.130321	0.519846	0.626489	0.990157	0.365489	0.899374	0.795845	0.999238	0.87307	0.958437	0.901092	0.927212	0
CATCCACAGGGACATCAAGG	-	chrI	174688	174710	H144Y	NA	NA	-6	6	TRUE	eProvs	YAR019C	CDC15	Protein kinase of the Mitotic Exit Network; localized to the spindle pole bodies at late anaphase; promotes mitotic exit by directly switching on the kinase activity of Dbf2p; required for spindle disassembly after meiosis II; relocalizes to the cytoplasm upon DNA replication stress	NA	NA	NA	NA	-0.653043	-0.491755	NA	NA	NA	NA	0.488879	NA	NA	NA	NA	0.778946	0.589951	NA	NA	NA	NA	0.788743	0
CTCCAGAGATCCTGGGCAAC	-	chrI	174557	174579	P187L	NA	NA	-10	10	TRUE	eProvs	YAR019C	CDC15	Protein kinase of the Mitotic Exit Network; localized to the spindle pole bodies at late anaphase; promotes mitotic exit by directly switching on the kinase activity of Dbf2p; required for spindle disassembly after meiosis II; relocalizes to the cytoplasm upon DNA replication stress	0.110469	0.0391691	-0.0241176	-0.124254	-0.0127169	0.172649	-0.0860012	0.249342	0.235733	-0.337401	-0.0215171	0.91592	0.974539	0.9985	0.835383	0.918226	0.764426	0.98997	0.832371	0.906685	0.895766	0.95205	0
CATGAATCAATATTTGTTCA	-	chrI	179556	179578	Q84*	NA	NA	NA	NA	FALSE	neStops	YAR023C	YAR023C	Putative integral membrane protein; member of DUP240 gene family	0.20163	0.121087	0.363809	-0.436342	-0.298658	0.360702	-0.568867	-0.0316829	0.167746	0.422826	0.246184	0.877896	0.957671	0.937335	0.514775	0.873018	0.545226	0.499506	0.899491	0.936786	0.882564	0.856567	0
AACCAGTATCTGTTTGACCA	+	chrI	184166	184188	Q134*	NA	NA	NA	NA	FALSE	neStops	YAR027W	UIP3	Putative integral membrane protein of unknown function; interacts with Ulp1p at the nuclear periphery; member of DUP240 gene family	-0.21211	-0.103395	0.292084	0.185675	-0.300456	0.345145	0.716346	0.409832	-0.132689	0.194805	0.180288	0.907801	0.971991	0.986305	0.832342	0.869472	0.669046	0.627229	0.7827	0.949708	0.901092	0.921782	0
GCTCTTCCCAAGGACATATT	+	chrI	187103	187125	L91F	P92F	NA	c(-3.505, -9.472)	9.472	FALSE	neProvs	YAR031W	PRM9	Pheromone-regulated protein; contains 3 predicted transmembrane segments and an FF sequence, a motif involved in COPII binding; member of DUP240 gene family; PRM9 has a paralog, PRM8, that arose from a segmental duplication	0.258457	0.0223034	-0.154745	0.0495481	0.0500933	-0.038024	0.167919	-0.0371927	0.125999	-0.146953	0.00413513	0.715284	0.979575	0.988598	0.881636	0.899374	0.849497	0.941251	0.893096	0.932346	0.901092	0.953669	0
ACTACCCATCCCGCCACTGC	+	chrI	190210	190232	P8F	NA	NA	-10.946	10.946	FALSE	neProvs	YAR035W	YAT1	Outer mitochondrial carnitine acetyltransferase; minor ethanol-inducible enzyme involved in transport of activated acyl groups from the cytoplasm into the mitochondrial matrix; phosphorylated	-0.12613	-0.459368	-0.157068	0.0528833	-0.00604652	-0.186076	0.119678	0.260306	0.314953	0.000207685	0.105055	0.903734	0.639412	0.988598	0.881411	0.922299	0.697601	0.971349	0.809904	0.832545	0.919646	0.921782	0
AGCCGAATAGCCGCTCATAC	-	chrI	190666	190688	G165S	NA	NA	-5.993	5.993	FALSE	neProvs	YAR035W	YAT1	Outer mitochondrial carnitine acetyltransferase; minor ethanol-inducible enzyme involved in transport of activated acyl groups from the cytoplasm into the mitochondrial matrix; phosphorylated	0.215716	-0.229611	-0.142701	0.141177	-0.416298	0.132877	0.134041	0.141624	-0.062984	-0.0707678	0.132181	0.877896	0.925329	0.990002	0.83949	0.863138	0.80139	0.982679	0.875167	0.959199	0.901092	0.921782	0
ATGACCAAGGCGTTCCAAAA	+	chrI	191645	191667	T486I	NA	NA	-5.914	5.914	FALSE	neProvs	YAR035W	YAT1	Outer mitochondrial carnitine acetyltransferase; minor ethanol-inducible enzyme involved in transport of activated acyl groups from the cytoplasm into the mitochondrial matrix; phosphorylated	0.0376539	0.437967	0.301657	-0.0975629	-0.0415234	0.33544	-0.0517747	-0.193127	-0.134409	0.0528689	-0.154524	0.9323	0.634874	0.972782	0.842018	0.9137	0.42052	0.999238	0.835256	0.936357	0.901092	0.898132	0
CAACCCGTACTTCCAACTGC	+	chrI	190465	190487	P93L	NA	NA	-9.981	9.981	FALSE	neProvs	YAR035W	YAT1	Outer mitochondrial carnitine acetyltransferase; minor ethanol-inducible enzyme involved in transport of activated acyl groups from the cytoplasm into the mitochondrial matrix; phosphorylated	-0.304882	-0.231266	-0.286481	0.371939	-0.176803	0.422693	-0.230573	-0.00116941	0.0535142	-0.199014	0.01314	0.855758	0.91031	0.983555	0.551899	0.899374	0.456776	0.946389	0.907647	0.959199	0.901092	0.952416	0
CAACCGCTACCTGGCACGCG	+	chrI	190240	190262	R18C	NA	NA	-6.654	6.654	FALSE	neProvs	YAR035W	YAT1	Outer mitochondrial carnitine acetyltransferase; minor ethanol-inducible enzyme involved in transport of activated acyl groups from the cytoplasm into the mitochondrial matrix; phosphorylated	-0.0507809	0.102432	-0.0224801	0.194978	-0.227594	-0.0684373	0.162115	0.13389	0.344051	0.192615	-0.0567127	0.927181	0.9567	0.998202	0.707908	0.864345	0.831414	0.938944	0.863028	0.793313	0.901092	0.936086	0
CCTCATACATCGAGCAGTTC	+	chrI	190398	190420	S70L	NA	NA	-5.692	5.692	FALSE	neProvs	YAR035W	YAT1	Outer mitochondrial carnitine acetyltransferase; minor ethanol-inducible enzyme involved in transport of activated acyl groups from the cytoplasm into the mitochondrial matrix; phosphorylated	-0.0365293	-0.0340941	0.104402	0.0477846	-0.302694	-0.0366239	0.106721	-0.218739	-0.376642	0.142564	0.0953176	0.929906	0.972561	0.988601	0.873144	0.600106	0.84735	0.967952	0.800181	0.487813	0.901092	0.914781	0
CGTGACCAAGAACGGTAAGG	+	chrI	191191	191213	T335I	NA	NA	-5.867	5.867	FALSE	neProvs	YAR035W	YAT1	Outer mitochondrial carnitine acetyltransferase; minor ethanol-inducible enzyme involved in transport of activated acyl groups from the cytoplasm into the mitochondrial matrix; phosphorylated	-0.245942	0.0428589	0.0861247	0.163046	0.0994033	0.418273	-0.139115	0.09394	0.00546313	-0.0270956	0.0533603	0.808403	0.974437	0.990002	0.7914	0.899374	0.399398	0.970385	0.879427	0.962971	0.903529	0.936086	0
CTTCGTGCAGCAGGTGTTCC	+	chrI	191572	191594	Q463*	NA	NA	NA	NA	FALSE	neStops	YAR035W	YAT1	Outer mitochondrial carnitine acetyltransferase; minor ethanol-inducible enzyme involved in transport of activated acyl groups from the cytoplasm into the mitochondrial matrix; phosphorylated	0.203724	0.447554	-0.107891	0.337442	-0.307822	0.168002	0.0236302	0.14397	-0.19653	0.362629	-0.43191	0.87346	0.740449	0.990002	0.650219	0.874155	0.749125	0.999797	0.872795	0.925007	0.885443	0.673555	0
GATGCCCGCCTTACCGTTCT	-	chrI	191196	191218	G341N	NA	NA	-6	6	FALSE	neProvs	YAR035W	YAT1	Outer mitochondrial carnitine acetyltransferase; minor ethanol-inducible enzyme involved in transport of activated acyl groups from the cytoplasm into the mitochondrial matrix; phosphorylated	-0.110509	0.116712	-0.137609	-0.018821	-0.152375	-0.130348	0.175913	0.383543	0.0272566	-0.281325	0.0742824	0.909144	0.9567	0.988601	0.892952	0.898896	0.763365	0.947113	0.677322	0.959677	0.885443	0.931832	0
GGCGCACTCGCAAATCACAA	+	chrI	191782	191804	H532Y	NA	NA	-5.909	5.909	FALSE	neProvs	YAR035W	YAT1	Outer mitochondrial carnitine acetyltransferase; minor ethanol-inducible enzyme involved in transport of activated acyl groups from the cytoplasm into the mitochondrial matrix; phosphorylated	-0.201799	0.160982	0.0424596	-0.257236	-0.0380605	-0.319863	0.205997	-0.17043	0.0106853	0.00545265	-0.169155	0.867931	0.936122	0.995866	0.688998	0.9137	0.566251	0.947113	0.851813	0.962502	0.912095	0.87395	0
GTGCCTGTCTGCACGTTCAA	-	chrI	191132	191154	G320N	NA	NA	-6	6	FALSE	neProvs	YAR035W	YAT1	Outer mitochondrial carnitine acetyltransferase; minor ethanol-inducible enzyme involved in transport of activated acyl groups from the cytoplasm into the mitochondrial matrix; phosphorylated	-0.273763	0.0329694	-0.235626	0.0719319	-0.0422629	-0.180468	0.105445	-0.147604	0.160699	0.180713	-0.359959	0.715284	0.977007	0.969329	0.859158	0.913688	0.683734	0.971969	0.857328	0.921009	0.901092	0.427758	0
GTTCCACTCCAGTTGTTCTG	-	chrI	190830	190852	W219*	NA	NA	NA	NA	FALSE	neStops	YAR035W	YAT1	Outer mitochondrial carnitine acetyltransferase; minor ethanol-inducible enzyme involved in transport of activated acyl groups from the cytoplasm into the mitochondrial matrix; phosphorylated	0.137873	0.483404	0.675518	-0.404552	-0.297231	NA	NA	0.938135	0.100691	NA	0.279228	0.912987	0.818772	0.821311	0.757544	0.898896	NA	NA	0.539324	0.957553	NA	0.896578	0
TGCGCCATTCCAGTTTACGA	-	chrI	191407	191429	W411*	NA	NA	NA	NA	FALSE	neStops	YAR035W	YAT1	Outer mitochondrial carnitine acetyltransferase; minor ethanol-inducible enzyme involved in transport of activated acyl groups from the cytoplasm into the mitochondrial matrix; phosphorylated	-0.056354	-0.182453	0.0182797	0.217978	-0.176538	-0.318557	-0.0315124	0.661046	-0.0976758	0.0159658	-0.1332	0.9323	0.9567	0.9985	0.819975	0.899374	0.63856	0.999797	0.570982	0.956147	0.903529	0.921782	0
ACAGACCAGAGACCAATCTT	-	chrI	195004	195026	W801*	NA	NA	NA	NA	FALSE	neStops	YAR042W	SWH1	Protein similar to mammalian oxysterol-binding protein; contains ankyrin repeats and FFAT motif; interacts with ER anchor Scs2p at the nucleus-vacuole junction; regulated by sterol binding; SWH1 has a paralog, OSH2, that arose from the whole genome duplication	-0.146804	-0.255586	0.235559	0.125751	0.376638	0.129915	-0.409415	-0.266383	0.0964211	-0.207973	0.339362	0.919376	0.925329	0.986573	0.850263	0.798607	0.830058	0.897569	0.853337	0.958015	0.901092	0.757029	0
ACCCATCTATTTGTCTCGAT	-	chrI	193708	193730	R369K	W370*	NA	c(-1.294, NA)	1.294	FALSE	neStops	YAR042W	SWH1	Protein similar to mammalian oxysterol-binding protein; contains ankyrin repeats and FFAT motif; interacts with ER anchor Scs2p at the nucleus-vacuole junction; regulated by sterol binding; SWH1 has a paralog, OSH2, that arose from the whole genome duplication	0.0689925	-0.0626456	0.0645259	0.212555	0.0958681	-0.220795	-0.0960808	-0.147299	0.100763	-0.402077	-0.281667	0.921387	0.971991	0.995762	0.749398	0.899374	0.646971	0.985984	0.86479	0.944549	0.83342	0.762979	0
AGAGCACGAAGACATGTTTA	-	chrI	193598	193620	C333Y	NA	NA	-8.573	8.573	FALSE	neProvs	YAR042W	SWH1	Protein similar to mammalian oxysterol-binding protein; contains ankyrin repeats and FFAT motif; interacts with ER anchor Scs2p at the nucleus-vacuole junction; regulated by sterol binding; SWH1 has a paralog, OSH2, that arose from the whole genome duplication	0.00998771	0.00549247	-0.0899892	0.0362098	0.221071	0.240223	-0.299404	-0.238772	0.269703	0.133787	0.0782086	0.940933	0.980348	0.990002	0.882396	0.819629	0.489563	0.819557	0.790867	0.810034	0.901092	0.921782	0
ATACCGATAACAGTGTTATT	-	chrI	195505	195527	G969N	NA	NA	-5.992	5.992	FALSE	neProvs	YAR042W	SWH1	Protein similar to mammalian oxysterol-binding protein; contains ankyrin repeats and FFAT motif; interacts with ER anchor Scs2p at the nucleus-vacuole junction; regulated by sterol binding; SWH1 has a paralog, OSH2, that arose from the whole genome duplication	0.229671	0.00529006	-0.21559	0.0462231	-0.0872571	-0.13886	-0.0528973	0.0292824	-0.0733513	-0.0615828	-0.119787	0.788455	0.980348	0.983555	0.874735	0.899374	0.733484	0.997292	0.897447	0.944549	0.901092	0.898132	0
CGAGACAAATAGATGGGTTT	+	chrI	193713	193735	T367I	NA	NA	-5.655	5.655	FALSE	neProvs	YAR042W	SWH1	Protein similar to mammalian oxysterol-binding protein; contains ankyrin repeats and FFAT motif; interacts with ER anchor Scs2p at the nucleus-vacuole junction; regulated by sterol binding; SWH1 has a paralog, OSH2, that arose from the whole genome duplication	-0.162142	0.19003	-0.0657969	0.44748	0.237449	-0.0376541	-0.0895128	-0.187003	0.0155968	-0.2092	0.120978	0.918539	0.936122	0.995762	0.628185	0.873018	0.859544	0.992639	0.862025	0.961765	0.901092	0.921782	0
CGCCCCCATGGCTGTCATAA	+	chrI	192804	192826	P64F	NA	NA	-9.94	9.94	FALSE	neProvs	YAR042W	SWH1	Protein similar to mammalian oxysterol-binding protein; contains ankyrin repeats and FFAT motif; interacts with ER anchor Scs2p at the nucleus-vacuole junction; regulated by sterol binding; SWH1 has a paralog, OSH2, that arose from the whole genome duplication	-0.102528	-0.240604	0.202434	-0.192925	0.300133	0.06185	0.195757	0.25477	-0.0667501	-0.0976927	-0.185163	0.918539	0.907928	0.988598	0.778336	0.863138	0.843911	0.944036	0.831321	0.957553	0.901092	0.880872	0
TCAACCACAGGTTGAAACTG	+	chrI	194616	194638	P668L	Q669*	NA	c(-0.232, NA)	0.232	FALSE	neStops	YAR042W	SWH1	Protein similar to mammalian oxysterol-binding protein; contains ankyrin repeats and FFAT motif; interacts with ER anchor Scs2p at the nucleus-vacuole junction; regulated by sterol binding; SWH1 has a paralog, OSH2, that arose from the whole genome duplication	-0.0153077	-0.508788	-0.0917635	0.735194	-0.376574	0.0487774	0.506252	-0.155699	0.383043	-0.540722	-0.0986936	0.941618	0.836473	0.995762	0.378956	0.863138	0.859544	0.855798	0.871197	0.889913	0.874905	0.936086	0
TCACCGAGTAAGGGGTTGAA	-	chrI	195241	195263	G881N	NA	NA	-5.992	5.992	FALSE	neProvs	YAR042W	SWH1	Protein similar to mammalian oxysterol-binding protein; contains ankyrin repeats and FFAT motif; interacts with ER anchor Scs2p at the nucleus-vacuole junction; regulated by sterol binding; SWH1 has a paralog, OSH2, that arose from the whole genome duplication	0.114016	0.120622	0.117869	-0.117926	-0.146388	-0.0267832	0.145105	-0.0678617	0.258703	-0.193665	-0.0106683	0.91537	0.9567	0.990002	0.835383	0.899374	0.861858	0.970385	0.889437	0.867729	0.901092	0.952416	0
TGCCGTGCAAGTCGCCCCCA	+	chrI	192792	192814	Q61*	NA	NA	NA	NA	FALSE	neStops	YAR042W	SWH1	Protein similar to mammalian oxysterol-binding protein; contains ankyrin repeats and FFAT motif; interacts with ER anchor Scs2p at the nucleus-vacuole junction; regulated by sterol binding; SWH1 has a paralog, OSH2, that arose from the whole genome duplication	0.15052	-0.183736	-0.206021	0.0818482	0.137131	-0.109097	-0.410082	0.0639975	0.170937	0.0164466	0.061272	0.867318	0.907928	0.983555	0.851622	0.891921	0.790295	0.534519	0.886991	0.921009	0.903529	0.932596	0
TTTCCAGGAATAAGTTTCCT	-	chrI	195479	195501	W960*	NA	NA	NA	NA	FALSE	neStops	YAR042W	SWH1	Protein similar to mammalian oxysterol-binding protein; contains ankyrin repeats and FFAT motif; interacts with ER anchor Scs2p at the nucleus-vacuole junction; regulated by sterol binding; SWH1 has a paralog, OSH2, that arose from the whole genome duplication	-0.0599765	-0.133667	-0.103715	-0.101986	0.0249387	-0.102418	-0.210882	0.124097	0.0411908	0.220716	0.159241	0.928897	0.9567	0.990002	0.851622	0.9137	0.819779	0.942524	0.873873	0.959205	0.901092	0.880457	0
TTTGTAGCCTTGAGCGAAGT	-	chrI	193493	193515	G297D	NA	NA	-6.983	6.983	FALSE	neProvs	YAR042W	SWH1	Protein similar to mammalian oxysterol-binding protein; contains ankyrin repeats and FFAT motif; interacts with ER anchor Scs2p at the nucleus-vacuole junction; regulated by sterol binding; SWH1 has a paralog, OSH2, that arose from the whole genome duplication	0.0265756	-0.068535	0.0626675	-0.0632423	-0.345579	0.00970723	0.0958867	-0.265471	0.0287508	0.271192	0.0584959	0.935177	0.971991	0.995762	0.87126	0.688266	0.866931	0.983754	0.806688	0.959205	0.901092	0.936086	0
ATATCATAAAATAAGTTTAG	-	chrI	201685	201707	H29Y	NA	NA	-6	6	FALSE	neProvs	YAR047C	YAR047C	Dubious open reading frame; unlikely to encode a functional protein, based on available experimental and comparative sequence data	-0.0305621	0.0702263	-0.0393091	-0.209492	-0.0380845	0.071244	-0.102806	0.292924	-0.0804736	-0.0241104	-0.010263	0.93228	0.961409	0.995762	0.629145	0.899374	0.82189	0.972614	0.719281	0.938516	0.903529	0.952099	0
ACACCAGCAAGCAGCATGGT	+	chrI	207882	207904	P1495L	A1496V	NA	c(-5.892, -2.396)	5.892	FALSE	neProvs	YAR050W	FLO1	Lectin-like protein involved in flocculation; cell wall protein that binds mannose chains on the surface of other cells, confers floc-forming ability that is chymotrypsin sensitive and heat resistant; important for co-flocculation with other yeasts, mediating interaction with specific species; FLO1 has a paralog, FLO5, that arose from a segmental duplication	0.0268609	0.202111	-0.00281586	-0.225797	0.0115304	0.510599	-0.316925	-0.36423	-0.197104	0.286661	0.29278	0.934776	0.907928	0.999003	0.721879	0.917205	0.107441	0.829604	0.722822	0.920129	0.882132	0.744847	0
CAGTACAGTTAGATTGACTT	-	chrI	204173	204195	C263Y	NA	NA	-8.401	8.401	FALSE	neProvs	YAR050W	FLO1	Lectin-like protein involved in flocculation; cell wall protein that binds mannose chains on the surface of other cells, confers floc-forming ability that is chymotrypsin sensitive and heat resistant; important for co-flocculation with other yeasts, mediating interaction with specific species; FLO1 has a paralog, FLO5, that arose from a segmental duplication	0.227338	0.336389	0.138794	-0.189102	0.34461	0.186234	-0.00509865	-0.523518	-0.0376154	0.0971252	0.147578	0.832155	0.740449	0.988598	0.778557	0.658584	0.681198	0.999797	0.454925	0.959205	0.901092	0.898132	0
CAAAACACCACCTTGGGCGA	+	chrII	235463	235485	G108D	V109I	NA	c(-6.425, -0.909)	6.425	FALSE	neProvs	YBL003C	HTA2	Histone H2A; core histone protein required for chromatin assembly and chromosome function; one of two nearly identical (see also HTA1) subtypes; DNA damage-dependent phosphorylation by Mec1p facilitates DNA repair; acetylated by Nat4p	-0.110927	-0.125449	0.0485795	-0.249874	0.12934	0.132455	0.113623	0.599301	-0.0637478	0.0659252	-0.0263164	0.907803	0.955626	0.995762	0.732693	0.899374	0.7625	0.985984	0.320469	0.957553	0.901092	0.95091	0
ATACATGAAGAAAGGAGGTC	-	chrII	229481	229503	C622Y	NA	NA	-6.292	6.292	TRUE	eProvs	YBL004W	UTP20	Component of the small-subunit (SSU) processome; SSU processome is involved in the biogenesis of the 18S rRNA	NA	0.0229916	-0.0677163	-0.629055	-0.270439	-0.345548	NA	-0.103449	NA	NA	NA	NA	0.980118	0.995866	0.609353	0.897754	0.66562	NA	0.890578	NA	NA	NA	0
CAACCCTCCGATGGCTATTT	-	chrII	232155	232177	G1512E	G1513K	NA	c(-7.117, 1.014)	7.117	TRUE	eProvs	YBL004W	UTP20	Component of the small-subunit (SSU) processome; SSU processome is involved in the biogenesis of the 18S rRNA	0.246585	-0.0118942	0.0280765	0.062658	-0.101921	-0.242264	0.338765	-0.156697	-0.094379	0.0392302	-0.0640533	0.756866	0.980103	0.996329	0.859086	0.899374	0.518119	0.75981	0.849158	0.943198	0.903529	0.936086	0
CTCGACCGAAGAAAATTCTA	-	chrII	230410	230432	G931N	NA	NA	-5.996	5.996	TRUE	eProvs	YBL004W	UTP20	Component of the small-subunit (SSU) processome; SSU processome is involved in the biogenesis of the 18S rRNA	0.214086	-0.0747944	-0.100564	-0.207452	0.186597	0.0330747	0.0479461	0.287168	0.0464559	-0.0905745	-0.169868	0.825229	0.962813	0.990002	0.674036	0.869472	0.854936	0.998936	0.75658	0.955827	0.901092	0.850156	0
GAGAAAGCATGCGAGATCGA	+	chrII	235027	235049	H2467Y	NA	NA	-6	6	TRUE	eProvs	YBL004W	UTP20	Component of the small-subunit (SSU) processome; SSU processome is involved in the biogenesis of the 18S rRNA	-0.274435	0.0781973	0.0847481	0.080784	-0.394186	0.226387	0.0351916	-0.322157	-0.0973076	-0.668226	-0.217115	0.877896	0.971991	0.995762	0.866433	0.718741	0.727829	0.999238	0.824439	0.945199	0.551162	0.850776	0
GATATTCTTCCTTCAAGGCT	+	chrII	227679	227701	S17F	NA	NA	-5.546	5.546	TRUE	eProvs	YBL004W	UTP20	Component of the small-subunit (SSU) processome; SSU processome is involved in the biogenesis of the 18S rRNA	-0.00621763	-0.236562	0.0426943	-0.194399	0.00575021	-0.0765518	-0.00319566	0.393795	0.116557	-0.151913	0.0272682	0.942127	0.88815	0.995762	0.723126	0.922312	0.819779	0.999797	0.669327	0.937088	0.901092	0.950676	0
GATTGAACCGGCTAGAAATT	+	chrII	227716	227738	P30S	NA	NA	-7.661	7.661	TRUE	eProvs	YBL004W	UTP20	Component of the small-subunit (SSU) processome; SSU processome is involved in the biogenesis of the 18S rRNA	0.300967	-0.218852	0.252574	0.0170918	0.0633328	-0.132915	-0.364597	0.547867	0.207379	0.186868	0.0411867	0.854312	0.939233	0.988601	0.892952	0.899374	0.819698	0.912288	0.723219	0.937088	0.901092	0.948915	0
GTCCGGCCGTCAGTCCGTAA	+	chrII	233854	233876	R2076C	NA	NA	-7.8	7.8	TRUE	eProvs	YBL004W	UTP20	Component of the small-subunit (SSU) processome; SSU processome is involved in the biogenesis of the 18S rRNA	0.185574	0.139954	0.310362	-0.134795	0.214776	0.221571	0.0638895	0.696631	-0.130775	-0.161139	0.00630442	0.904906	0.9567	0.986305	0.834613	0.899374	0.745307	0.999238	0.37141	0.944549	0.901092	0.953669	0
TCTGAGGCCAATCCTTATAT	-	chrII	231834	231856	G1405D	NA	NA	-6.544	6.544	TRUE	eProvs	YBL004W	UTP20	Component of the small-subunit (SSU) processome; SSU processome is involved in the biogenesis of the 18S rRNA	-0.111799	0.284676	-0.0881658	-0.0756699	0.0902844	0.0275395	0.0390352	-0.355221	-0.127743	0.110608	0.422752	0.909583	0.836798	0.990002	0.865382	0.899374	0.861242	0.999238	0.669327	0.937088	0.901092	0.377512	0
AAAGCAAACTCCTACTACGA	+	chrII	218390	218412	Q309*	NA	NA	NA	NA	FALSE	neStops	YBL005W	PDR3	Transcriptional activator of the pleiotropic drug resistance network; regulates expression of ATP-binding cassette (ABC) transporters through binding to cis-acting PDRE sites (PDR responsive elements); has a role in response to drugs and organic solvents; post-translationally up-regulated in cells lacking functional mitochondrial genome; involved in diauxic shift; relative distribution to nucleus…	-0.00168129	0.213623	-0.0063253	-0.231366	0.0305251	0.331023	0.0125593	0.200279	-0.0382393	-0.324556	0.223416	0.943714	0.925329	0.9985	0.733042	0.9137	0.568407	0.999797	0.846661	0.959205	0.874905	0.828775	0
AAGCCGCCGGTTCTTTGCAT	+	chrII	213698	213720	G888N	G889N	NA	c(-5.433, -5.067)	5.433	FALSE	neProvs	YBL007C	SLA1	Cytoskeletal protein binding protein; required for assembly of the cortical actin cytoskeleton; interacts with proteins regulating actin dynamics and proteins required for endocytosis; found in the nucleus and cell cortex; has 3 SH3 domains	0.367176	0.164347	0.00468568	-0.133299	-0.216306	0.192833	-0.257918	-0.153748	-0.00978224	0.607882	-0.577161	0.738893	0.939233	0.9985	0.825063	0.875122	0.740859	0.919645	0.877351	0.962934	0.557981	0.252142	0
AGAACCAACCTACTGGATTT	-	chrII	212707	212729	Q1215*	NA	NA	NA	NA	FALSE	neStops	YBL007C	SLA1	Cytoskeletal protein binding protein; required for assembly of the cortical actin cytoskeleton; interacts with proteins regulating actin dynamics and proteins required for endocytosis; found in the nucleus and cell cortex; has 3 SH3 domains	0.200023	NA	0.162679	-0.211732	-0.104547	0.337117	-0.199031	-0.203034	0.248511	-0.244168	0.0688326	0.907483	NA	0.990002	0.829512	0.899374	0.66562	0.95609	0.863987	0.928291	0.901092	0.942021	0
AGCTCTCAAGCTCAAAACAC	-	chrII	213062	213084	S1096F	Q1097*	NA	c(-1.059, NA)	1.059	FALSE	neStops	YBL007C	SLA1	Cytoskeletal protein binding protein; required for assembly of the cortical actin cytoskeleton; interacts with proteins regulating actin dynamics and proteins required for endocytosis; found in the nucleus and cell cortex; has 3 SH3 domains	-0.307318	NA	-0.0549076	0.0384711	0.0966112	-0.489767	-0.173182	0.141657	0.00364449	-0.188836	-0.10384	0.877896	NA	0.997312	0.892952	0.899374	0.497615	0.983717	0.878505	0.963142	0.901092	0.936086	0
ATATCGCCCCCAGTAATCAT	+	chrII	213725	213747	G879N	D880N	NA	c(-5.3, 0.125)	5.3	FALSE	neProvs	YBL007C	SLA1	Cytoskeletal protein binding protein; required for assembly of the cortical actin cytoskeleton; interacts with proteins regulating actin dynamics and proteins required for endocytosis; found in the nucleus and cell cortex; has 3 SH3 domains	0.0939383	-0.302512	-0.0363573	0.0394649	-0.0154713	-0.154238	0.228318	-0.276154	-0.06331	0.125812	0.14014	0.915831	0.769635	0.995866	0.882396	0.9137	0.725446	0.884403	0.775589	0.956182	0.901092	0.898132	0
ATCACCTTCGCGCAGACCCA	+	chrII	214252	214274	G704N	NA	NA	-6	6	FALSE	neProvs	YBL007C	SLA1	Cytoskeletal protein binding protein; required for assembly of the cortical actin cytoskeleton; interacts with proteins regulating actin dynamics and proteins required for endocytosis; found in the nucleus and cell cortex; has 3 SH3 domains	-0.0479124	0.148065	-0.196691	0.0621769	0.307109	-0.00868808	-0.205999	-0.179709	-0.0826969	-0.125831	-0.142793	0.930814	0.939088	0.986305	0.879424	0.828896	0.866956	0.938944	0.846661	0.945564	0.901092	0.898132	0
CCTGTTCAAAAGACAGGAAA	-	chrII	213620	213642	Q911*	NA	NA	NA	NA	FALSE	neStops	YBL007C	SLA1	Cytoskeletal protein binding protein; required for assembly of the cortical actin cytoskeleton; interacts with proteins regulating actin dynamics and proteins required for endocytosis; found in the nucleus and cell cortex; has 3 SH3 domains	-0.0433072	-0.00511655	NA	-0.112613	-0.814226	0.097861	-0.562133	0.249004	NA	NA	NA	0.93822	0.980348	NA	0.880169	0.535836	0.842945	0.905916	0.872795	NA	NA	NA	0
GAACCAATCATATTTGTTAC	+	chrII	214393	214415	W657*	NA	NA	NA	NA	FALSE	neStops	YBL007C	SLA1	Cytoskeletal protein binding protein; required for assembly of the cortical actin cytoskeleton; interacts with proteins regulating actin dynamics and proteins required for endocytosis; found in the nucleus and cell cortex; has 3 SH3 domains	-0.14205	-0.151479	-0.623944	0.0785581	-0.324196	0.0252988	-0.0331464	0.763551	-0.0108324	-0.157051	0.333343	0.91592	0.9567	0.702637	0.877343	0.869472	0.864447	0.999797	0.449052	0.962971	0.901092	0.832144	0
GCACCTCCTGTGGTGGCAAT	+	chrII	213494	213516	G956K	G957N	NA	c(-5.694, -3.95)	5.694	FALSE	neProvs	YBL007C	SLA1	Cytoskeletal protein binding protein; required for assembly of the cortical actin cytoskeleton; interacts with proteins regulating actin dynamics and proteins required for endocytosis; found in the nucleus and cell cortex; has 3 SH3 domains	0.0207862	-0.0550456	-0.119541	0.0900807	0.334236	0.115627	0.138655	-0.0410828	0.0108629	0.126046	0.0650737	0.939576	0.971991	0.990002	0.859158	0.774375	0.813808	0.970385	0.895557	0.962502	0.901092	0.936086	0
GCATTACAGAACCAACCTAC	-	chrII	212714	212736	Q1213*	NA	NA	NA	NA	FALSE	neStops	YBL007C	SLA1	Cytoskeletal protein binding protein; required for assembly of the cortical actin cytoskeleton; interacts with proteins regulating actin dynamics and proteins required for endocytosis; found in the nucleus and cell cortex; has 3 SH3 domains	-0.127432	-0.565987	0.138112	0.177741	-0.0771397	-0.0268215	-1.64217e-06	-0.282045	0.00442812	-0.476144	0.0406648	0.917143	0.633063	0.990002	0.824054	0.899374	0.865123	1	0.846661	0.963142	0.874843	0.948915	0
GTTGTTACCGATTGATAGCT	+	chrII	215539	215561	G274D	NA	NA	-5.95	5.95	FALSE	neProvs	YBL007C	SLA1	Cytoskeletal protein binding protein; required for assembly of the cortical actin cytoskeleton; interacts with proteins regulating actin dynamics and proteins required for endocytosis; found in the nucleus and cell cortex; has 3 SH3 domains	0.0799931	0.280889	0.296456	0.0785912	-0.163203	-0.174586	-0.108935	0.53476	0.172371	-0.279226	0.0887271	0.918585	0.885838	0.983555	0.868591	0.899374	0.745307	0.981837	0.593237	0.930165	0.895766	0.933579	0
TCTCAAGCTCAAAACACTGG	-	chrII	213059	213081	Q1097*	A1098V	NA	c(NA, 0.408)	0.408	FALSE	neStops	YBL007C	SLA1	Cytoskeletal protein binding protein; required for assembly of the cortical actin cytoskeleton; interacts with proteins regulating actin dynamics and proteins required for endocytosis; found in the nucleus and cell cortex; has 3 SH3 domains	0.421316	-0.384841	-0.102361	0.438152	0.0618455	-0.110368	0.133748	-0.120165	-0.0850554	-0.281183	-0.107828	0.767921	0.798144	0.992351	0.514775	0.899374	0.827721	0.979876	0.883663	0.957361	0.901092	0.929629	0
TTAATTCCTATCTCTAACAC	-	chrII	213596	213618	P919F	NA	NA	-8.725	8.725	FALSE	neProvs	YBL007C	SLA1	Cytoskeletal protein binding protein; required for assembly of the cortical actin cytoskeleton; interacts with proteins regulating actin dynamics and proteins required for endocytosis; found in the nucleus and cell cortex; has 3 SH3 domains	-0.0457493	-0.0713521	-0.115761	0.0700491	-0.310966	0.232028	0.119691	-0.0712597	0.184924	-0.0739288	0.199423	0.93228	0.970536	0.990002	0.870434	0.802493	0.63856	0.978987	0.887189	0.924709	0.901092	0.850659	0
TTCCGGCCGCAATCCCAATT	-	chrII	213035	213057	R1105W	P1106L	NA	c(-2.076, -6.506)	6.506	FALSE	neProvs	YBL007C	SLA1	Cytoskeletal protein binding protein; required for assembly of the cortical actin cytoskeleton; interacts with proteins regulating actin dynamics and proteins required for endocytosis; found in the nucleus and cell cortex; has 3 SH3 domains	0.0488111	-0.130169	-0.16276	-0.0339506	-0.246057	0.145958	0.09457	-0.179444	-0.0523904	-0.044817	0.0151382	0.92653	0.952689	0.986573	0.882585	0.819629	0.722359	0.978357	0.831107	0.957002	0.901092	0.95205	0
AGGCCATCGTGGTCTCCCGA	+	chrII	210361	210383	P238L	S239L	NA	c(4.167, -5.733)	5.733	FALSE	neProvs	YBL008W	HIR1	Subunit of the HIR complex; HIR is a nucleosome assembly complex involved in regulation of histone gene transcription; contributes to nucleosome formation, heterochromatic gene silencing, and formation of functional kinetochores	0.127477	0.310072	0.0638689	-0.303505	0.17328	-0.107668	0.138745	-0.0898607	0.150659	0.361911	0.577225	0.909908	0.865947	0.995762	0.625196	0.897754	0.794234	0.974468	0.882247	0.932425	0.828834	0.077505	0
TGGGCAAGATAAATCCTTAG	+	chrII	210645	210667	Q333*	NA	NA	NA	NA	FALSE	neStops	YBL008W	HIR1	Subunit of the HIR complex; HIR is a nucleosome assembly complex involved in regulation of histone gene transcription; contributes to nucleosome formation, heterochromatic gene silencing, and formation of functional kinetochores	0.0480011	-0.382333	0.0385019	0.0425085	0.405186	-0.477846	0.275826	0.15778	0.31514	-0.0278097	-0.0524006	0.934322	0.88815	0.997896	0.892952	0.820714	0.413576	0.941251	0.871544	0.906685	0.903529	0.945006	0
GAACATTCATAAAATAATTA	+	chrII	209579	209601	H60Y	NA	NA	-6	6	FALSE	neProvs	YBL008W-A	YBL008W-A	Putative protein of unknown function; identified by fungal homology and RT-PCR	-0.258741	0.106893	0.37584	0.157842	-0.280836	0.0831461	-0.381476	0.0164453	0.0184135	0.0779163	-0.0166979	0.852623	0.967033	0.966628	0.836457	0.891921	0.836403	0.895996	0.90547	0.961765	0.901092	0.952099	0
ATCAACAGATGACTGACAGA	+	chrII	207216	207238	Q10*	NA	NA	NA	NA	FALSE	neStops	YBL009W	ALK2	Protein kinase; along with its paralog, ALK1, required for proper spindle positioning and nuclear segregation following mitotic arrest, proper organization of cell polarity factors in mitosis, proper localization of formins and polarity factors, and survival in cells that activate spindle assembly checkpoint; phosphorylated in response to DNA damage; ALK2 has a paralog, ALK1, that arose from the …	NA	NA	NA	-0.117932	0.347519	0.0289588	NA	0.121872	NA	NA	NA	NA	NA	NA	0.874027	0.891921	0.86597	NA	0.890397	NA	NA	NA	0
GTAGCCCAGGATATTGGCTG	-	chrII	208970	208992	W598*	A599T	NA	c(NA, -0.463)	0.463	FALSE	neStops	YBL009W	ALK2	Protein kinase; along with its paralog, ALK1, required for proper spindle positioning and nuclear segregation following mitotic arrest, proper organization of cell polarity factors in mitosis, proper localization of formins and polarity factors, and survival in cells that activate spindle assembly checkpoint; phosphorylated in response to DNA damage; ALK2 has a paralog, ALK1, that arose from the …	-0.0161721	0.0613679	-0.690301	0.0519271	-0.300629	0.136314	-0.0567772	-0.229306	-0.490795	0.0127198	-0.0104295	0.939863	0.971991	0.619223	0.882396	0.887548	0.80951	0.999238	0.840331	0.673244	0.904025	0.9526	0
AAACCTCAGAATTGAATCGC	+	chrII	205387	205409	T618I	S619L	NA	c(-5.335, -1.983)	5.335	FALSE	neProvs	YBL011W	SCT1	Glycerol 3-phosphate/dihydroxyacetone phosphate sn-1 acyltransferase; dual substrate-specific acyltransferase of the glycerolipid biosynthesis pathway; prefers 16-carbon fatty acids; similar to Gpt2p; gene is constitutively transcribed	0.057113	0.197063	-0.0379925	0.478528	0.212393	-0.139355	-0.177257	-0.0495649	0.290639	0.0472301	-0.106875	0.92653	0.903993	0.995866	0.207023	0.874036	0.745307	0.942524	0.891371	0.834121	0.901092	0.921782	0
GACCAAAAGATGTAAAGCAA	-	chrII	205041	205063	W508*	NA	NA	NA	NA	FALSE	neStops	YBL011W	SCT1	Glycerol 3-phosphate/dihydroxyacetone phosphate sn-1 acyltransferase; dual substrate-specific acyltransferase of the glycerolipid biosynthesis pathway; prefers 16-carbon fatty acids; similar to Gpt2p; gene is constitutively transcribed	0.570737	-0.143687	-0.207342	-0.198545	0.339947	0.429275	0.167451	-0.210861	-0.168927	-0.477015	0.344755	0.338635	0.9567	0.986497	0.805272	0.811591	0.286599	0.970874	0.849158	0.937088	0.688456	0.850156	0
TCTTCCTGATCACCTTGTGG	+	chrII	204785	204807	P418F	NA	NA	-10.283	10.283	FALSE	neProvs	YBL011W	SCT1	Glycerol 3-phosphate/dihydroxyacetone phosphate sn-1 acyltransferase; dual substrate-specific acyltransferase of the glycerolipid biosynthesis pathway; prefers 16-carbon fatty acids; similar to Gpt2p; gene is constitutively transcribed	0.106126	0.189203	0.0594757	-0.0669414	-0.0220547	0.174843	0.0904772	-0.000390138	0.032986	-0.0245236	-0.146487	0.918895	0.939136	0.995762	0.882396	0.913976	0.776513	0.996942	0.908144	0.960122	0.903529	0.921782	0
TTACCCAAATCAATGGGATT	+	chrII	204078	204100	P182F	NA	NA	-10.616	10.616	FALSE	neProvs	YBL011W	SCT1	Glycerol 3-phosphate/dihydroxyacetone phosphate sn-1 acyltransferase; dual substrate-specific acyltransferase of the glycerolipid biosynthesis pathway; prefers 16-carbon fatty acids; similar to Gpt2p; gene is constitutively transcribed	NA	0.756227	0.181342	0.257703	-0.115202	0.118679	0.729763	-0.0704037	-0.287714	0.248755	-0.224971	NA	0.590798	0.990002	0.829233	0.899374	0.834498	0.752583	0.892371	0.925007	0.901092	0.898132	0
ATCCAGCGAGCTCTGCTCGA	+	chrII	202563	202585	Q171*	R172*	NA	c(NA, NA)	NA	FALSE	neStops	YBL013W	FMT1	Methionyl-tRNA formyltransferase; catalyzes the formylation of initiator Met-tRNA in mitochondria; potential Cdc28p substrate	-0.0289943	-0.339166	-0.446712	0.0610761	-0.222526	-0.409892	0.0104032	0.0835188	0.0613291	-0.527959	0.302818	0.93822	0.798144	0.797954	0.880169	0.897754	0.370233	0.999797	0.890497	0.958437	0.686696	0.788743	0
TACAGACACTGCATCCGGAT	+	chrII	202609	202631	T187I	NA	NA	-5.433	5.433	FALSE	neProvs	YBL013W	FMT1	Methionyl-tRNA formyltransferase; catalyzes the formylation of initiator Met-tRNA in mitochondria; potential Cdc28p substrate	-0.0733878	-0.408112	-0.0679924	-0.441683	0.401265	0.0130562	0.135369	NA	NA	0.463544	-0.101737	0.927388	0.88815	0.995762	0.705284	0.820714	0.868067	0.989323	NA	NA	0.885355	0.936086	0
AATATCTTGGAAACACGATC	-	chrII	200422	200444	S437F	NA	NA	-5.767	5.767	TRUE	eProvs	YBL014C	RRN6	Component of the core factor (CF) rDNA transcription factor complex; CF is required for transcription of 35S rRNA genes by RNA polymerase I and is composed of Rrn6p, Rrn7p, and Rrn11p	NA	-1.47883	NA	-0.525004	-0.940543	NA	NA	NA	NA	NA	-0.975408	NA	0.0487159	NA	0.684042	0.115062	NA	NA	NA	NA	NA	0.273403	1
ATTCCAAGCTCAGATGTGTT	-	chrII	201711	201733	P7L	NA	NA	-6.683	6.683	TRUE	eProvs	YBL014C	RRN6	Component of the core factor (CF) rDNA transcription factor complex; CF is required for transcription of 35S rRNA genes by RNA polymerase I and is composed of Rrn6p, Rrn7p, and Rrn11p	0.185732	0.507882	-0.21115	-0.171873	0.168001	0.421265	0.229584	-0.151667	0.365166	-0.0719418	0.129673	0.854459	0.547259	0.986305	0.82883	0.899374	0.352356	0.947113	0.871197	0.84946	0.901092	0.921782	0
CATCGGGCGGAGATCAAACC	-	chrII	200968	200990	R256W	NA	NA	-6.233	6.233	TRUE	eProvs	YBL014C	RRN6	Component of the core factor (CF) rDNA transcription factor complex; CF is required for transcription of 35S rRNA genes by RNA polymerase I and is composed of Rrn6p, Rrn7p, and Rrn11p	0.188183	0.255534	-0.0648288	0.277558	0.117851	-0.136406	-0.0931168	0.471055	-0.453186	0.227157	0.0158437	0.901694	0.914432	0.995762	0.724789	0.899374	0.768944	0.989707	0.672706	0.747804	0.901092	0.952099	0
CGGGCGGAGATCAAACCTGG	-	chrII	200965	200987	R256W	NA	NA	-6.233	6.233	TRUE	eProvs	YBL014C	RRN6	Component of the core factor (CF) rDNA transcription factor complex; CF is required for transcription of 35S rRNA genes by RNA polymerase I and is composed of Rrn6p, Rrn7p, and Rrn11p	-0.146456	0.268529	-0.0560981	-0.333489	-0.314011	0.372253	-0.0960091	0.0980958	-0.113976	-0.120123	0.277858	0.916262	0.925329	0.995866	0.719436	0.871897	0.602548	0.997662	0.890578	0.952932	0.901092	0.835502	0
GAGCCTAACACATCTGAGCT	+	chrII	201708	201730	G13N	NA	NA	-5.7	5.7	TRUE	eProvs	YBL014C	RRN6	Component of the core factor (CF) rDNA transcription factor complex; CF is required for transcription of 35S rRNA genes by RNA polymerase I and is composed of Rrn6p, Rrn7p, and Rrn11p	-0.138862	-0.171171	0.170527	0.140662	0.0719019	0.146366	0.189933	0.156046	-0.186199	0.308483	0.443473	0.881037	0.925329	0.988601	0.826346	0.899374	0.749125	0.949562	0.857045	0.925007	0.882132	0.366837	0
GCCAATTCTACAAATGTGAA	+	chrII	195259	195281	S382F	NA	NA	-5.996	5.996	FALSE	neProvs	YBL015W	ACH1	Protein with CoA transferase activity; particularly for CoASH transfer from succinyl-CoA to acetate; has minor acetyl-CoA-hydrolase activity; phosphorylated; required for acetate utilization and for diploid pseudohyphal growth	-0.00164213	0.241953	-0.0500464	-0.108633	0.308174	-0.511909	-0.413795	-0.817505	0.0935558	-0.0269362	0.432381	0.943928	0.925329	0.995866	0.860707	0.875057	0.40893	0.819557	0.465793	0.956349	0.903529	0.613333	0
GGAGTCCACCATGAGGGACC	+	chrII	194808	194830	S231F	NA	NA	-5.21	5.21	FALSE	neProvs	YBL015W	ACH1	Protein with CoA transferase activity; particularly for CoASH transfer from succinyl-CoA to acetate; has minor acetyl-CoA-hydrolase activity; phosphorylated; required for acetate utilization and for diploid pseudohyphal growth	0.0847854	-0.24401	-0.210969	-0.24001	0.114474	-0.0323747	0.000553909	-0.260171	0.0331886	-0.0512676	-0.241045	0.918585	0.886811	0.984118	0.699359	0.899374	0.859544	0.999971	0.795541	0.959205	0.901092	0.828775	0
CTTCCAGTTGAAGTCGTTAC	+	chrII	192486	192508	Q14*	NA	NA	NA	NA	FALSE	neStops	YBL016W	FUS3	Mitogen-activated serine/threonine protein kinase involved in mating; phosphoactivated by Ste7p; substrates include Ste12p, Far1p, Bni1p, Sst2p; inhibits invasive growth during mating by phosphorylating Tec1p, promoting its; inhibits recruitment of Ste5p, Cdc42p-mediated asymmetry and mating morphogenesis	-0.444743	-0.879935	-0.677453	-0.0698345	-0.534764	0.0286016	-0.493314	0.700549	-0.722179	NA	-1.69833	0.743924	0.491937	0.792959	0.882396	0.765001	0.863301	0.855798	0.618854	0.484812	NA	0.00257511	1
AGAACCTTTATTTCTAGGGA	-	chrII	190109	190131	T486I	NA	NA	-5.557	5.557	FALSE	neProvs	YBL017C	PEP1	Type I transmembrane sorting receptor for multiple vacuolar hydrolases; cycles between the late-Golgi and prevacuolar endosome-like compartments	0.234122	0.355187	-0.559347	0.085615	-0.091442	-0.154792	-0.109229	-0.0275129	0.539827	0.4405	-0.134146	0.877896	0.857087	0.854193	0.876345	0.899374	0.803659	0.987516	0.901682	0.675634	0.815886	0.921782	0
CCACCCTCACAGGTTGATAG	+	chrII	187487	187509	E1364K	G1365N	NA	c(-0.251, -5.029)	5.029	FALSE	neProvs	YBL017C	PEP1	Type I transmembrane sorting receptor for multiple vacuolar hydrolases; cycles between the late-Golgi and prevacuolar endosome-like compartments	-0.020618	-0.00781488	0.0291573	0.0328593	-0.0472085	0.0541156	-0.101112	0.0975167	-0.164892	0.239735	0.00746229	0.935349	0.980348	0.99623	0.882703	0.899374	0.836975	0.973872	0.871868	0.924393	0.890619	0.9526	0
GAGTGTTCATTGCACTTACA	-	chrII	188273	188295	S1099L	NA	NA	-5.526	5.526	FALSE	neProvs	YBL017C	PEP1	Type I transmembrane sorting receptor for multiple vacuolar hydrolases; cycles between the late-Golgi and prevacuolar endosome-like compartments	-0.115065	0.28969	0.308486	0.00649399	-0.025111	0.128987	0.105522	-0.283541	0.345895	-0.0521768	-0.279417	0.90686	0.853295	0.938481	0.893129	0.9137	0.768423	0.975412	0.758263	0.694937	0.901365	0.678304	0
TATGTCTTCCATGGATGTGT	-	chrII	190689	190711	S293F	NA	NA	-5.384	5.384	FALSE	neProvs	YBL017C	PEP1	Type I transmembrane sorting receptor for multiple vacuolar hydrolases; cycles between the late-Golgi and prevacuolar endosome-like compartments	NA	NA	0.257992	0.0874172	0.0340584	-0.233364	-0.226757	-0.195485	-0.28665	0.112507	-0.394599	NA	NA	0.988601	0.874735	0.9137	0.779546	0.978357	0.873873	0.930302	0.901092	0.829178	0
TCATCACCACATGCTTGCCC	-	chrII	187445	187467	S1374L	P1375L	NA	c(-2.882, -5.925)	5.925	FALSE	neProvs	YBL017C	PEP1	Type I transmembrane sorting receptor for multiple vacuolar hydrolases; cycles between the late-Golgi and prevacuolar endosome-like compartments	-0.310953	0.356432	-0.217031	-0.0019273	-0.0513427	0.322653	-0.0605603	-0.228553	0.391969	-0.106027	0.0492292	0.825229	0.825151	0.986305	0.899951	0.900574	0.522113	0.999125	0.829051	0.769953	0.901092	0.940156	0
TGGGCAAGCATGTGGTGATG	+	chrII	187447	187469	C1378Y	NA	NA	-10.441	10.441	FALSE	neProvs	YBL017C	PEP1	Type I transmembrane sorting receptor for multiple vacuolar hydrolases; cycles between the late-Golgi and prevacuolar endosome-like compartments	0.161762	-0.161318	-0.0308501	-0.160767	0.0139485	0.153002	0.063509	-0.0762902	-0.224136	-0.104258	0.182398	0.877896	0.936122	0.997929	0.799688	0.9137	0.737872	0.996942	0.882677	0.900347	0.901092	0.850156	0
CAAATCCAGAACTTTCTACC	-	chrII	185829	185851	W498*	NA	NA	NA	NA	FALSE	neStops	YBL019W	APN2	Class II abasic (AP) endonuclease involved in repair of DNA damage; homolog of human HAP1 and E. coli exoIII	-0.0396787	-0.0369009	-0.132617	-0.80938	-0.128008	0.129176	0.0825723	-0.156404	-0.112809	0.179021	0.0994646	0.934776	0.980084	0.990002	0.233221	0.899374	0.817248	0.997916	0.873873	0.951669	0.901092	0.931889	0
CGCCGATCGAAGAATCTCTG	+	chrII	183413	183435	P339L	NA	NA	-9.987	9.987	TRUE	eProvs	YBL020W	RFT1	Membrane protein required for translocation of Man5GlcNac2-PP-Dol; required for translocation of Man5GlcNac2-PP-Dol from the cytoplasmic side to the lumenal side of the ER membrane but is not the flippase; mutation is suppressed by expression of human p53 protein; essential gene	-0.0243216	0.163424	-0.180842	-0.12626	-0.0937594	-0.0320826	0.368883	0.18432	0.233565	-0.0912712	-0.127416	0.934776	0.936122	0.986305	0.83139	0.899374	0.858033	0.76904	0.842562	0.908161	0.901092	0.912094	0
TACCATTAAGCGATAAAAAT	-	chrII	183651	183673	G424S	NA	NA	-5.992	5.992	TRUE	eProvs	YBL020W	RFT1	Membrane protein required for translocation of Man5GlcNac2-PP-Dol; required for translocation of Man5GlcNac2-PP-Dol from the cytoplasmic side to the lumenal side of the ER membrane but is not the flippase; mutation is suppressed by expression of human p53 protein; essential gene	0.1227	0.0492294	0.145914	0.236039	-0.320478	-0.261046	0.161713	0.74709	0.0885559	0.350521	-0.146575	0.913617	0.974472	0.990002	0.803778	0.870532	0.730868	0.975412	0.555664	0.957361	0.885443	0.921782	0
TTTAAGCATTTGTTGACAGA	+	chrII	183292	183314	H300Y	NA	NA	-5.326	5.326	TRUE	eProvs	YBL020W	RFT1	Membrane protein required for translocation of Man5GlcNac2-PP-Dol; required for translocation of Man5GlcNac2-PP-Dol from the cytoplasmic side to the lumenal side of the ER membrane but is not the flippase; mutation is suppressed by expression of human p53 protein; essential gene	0.105121	-0.0399721	-0.173989	0.195272	0.220659	0.061521	0.155647	-0.120077	0.221753	0.193439	-0.35989	0.907801	0.974559	0.986573	0.748519	0.871897	0.846084	0.968105	0.86675	0.90261	0.901092	0.616562	0
GTATGAGCAGGACGACGAAG	-	chrII	181668	181690	Q138*	NA	NA	NA	NA	FALSE	neStops	YBL021C	HAP3	Subunit of the Hap2p/3p/4p/5p CCAAT-binding complex; complex is heme-activated and glucose-repressed; complex is a transcriptional activator and global regulator of respiratory gene expression; contains sequences contributing to both complex assembly and DNA binding	0.24845	-0.155626	0.168218	-0.172416	0.670261	-0.257032	0.139321	-0.438848	0.315708	-0.0826836	0.0910733	0.87477	0.9567	0.988601	0.82883	0.658303	0.703408	0.987022	0.743517	0.921009	0.901092	0.936086	0
AAAAGAACAAGCAAAGGATA	-	chrII	180375	180397	Q296*	NA	NA	NA	NA	FALSE	neStops	YBL022C	PIM1	ATP-dependent Lon protease; involved in degradation of misfolded proteins in mitochondria; required for biogenesis and maintenance of mitochondria	-0.446227	-0.283936	0.226469	0.250568	0.0940775	0.0729064	0.226754	0.232232	0.129657	-0.0267922	0.0809501	0.761612	0.936122	0.988601	0.809668	0.899374	0.859544	0.969132	0.859931	0.944549	0.903529	0.94001	0
AACCCCATAACTACCCCTGG	+	chrII	178481	178503	M930I	G931K	NA	c(-3.994, -7.988)	7.988	FALSE	neProvs	YBL022C	PIM1	ATP-dependent Lon protease; involved in degradation of misfolded proteins in mitochondria; required for biogenesis and maintenance of mitochondria	0.184197	0.137448	-0.058658	-0.103107	-0.117305	-0.0673975	0.0398854	-0.00340781	0.343198	0.179307	-0.227605	0.850929	0.936122	0.995762	0.848774	0.899374	0.828578	0.999238	0.907462	0.779305	0.901092	0.77701	0
ATCCAACATTTGAAAGGACC	-	chrII	178384	178406	P958L	T959I	NA	c(-8.015, -2.752)	8.015	FALSE	neProvs	YBL022C	PIM1	ATP-dependent Lon protease; involved in degradation of misfolded proteins in mitochondria; required for biogenesis and maintenance of mitochondria	-0.658768	-0.970753	0.498652	0.398257	-0.0702219	0.060731	0.122655	0.127372	NA	-0.422302	-0.0123928	0.59848	0.631371	0.983555	0.733963	0.9137	0.85574	0.996942	0.886265	NA	0.901092	0.953669	0
ATCCACTTGCATTGTCCTGA	-	chrII	178256	178278	H1001Y	NA	NA	-5.878	5.878	FALSE	neProvs	YBL022C	PIM1	ATP-dependent Lon protease; involved in degradation of misfolded proteins in mitochondria; required for biogenesis and maintenance of mitochondria	-0.248931	-0.25402	-0.20635	0.0586315	0.205041	0.0535592	0.219158	0.348475	0.229528	0.00825319	-0.276817	0.808403	0.875616	0.986305	0.874735	0.875057	0.847244	0.912288	0.747276	0.899033	0.908398	0.711614	0
GCTAACATCAGAAATATTGA	-	chrII	180063	180085	T399I	NA	NA	-5.353	5.353	FALSE	neProvs	YBL022C	PIM1	ATP-dependent Lon protease; involved in degradation of misfolded proteins in mitochondria; required for biogenesis and maintenance of mitochondria	-0.224768	-0.295069	0.113434	-0.101879	0.107682	-0.325001	0.0759673	-0.210286	0.493775	-0.156301	-0.192265	0.81716	0.840739	0.990002	0.851342	0.899374	0.494632	0.995213	0.845926	0.433212	0.901092	0.866909	0
GGTCATAGGAGAACGTATAT	-	chrII	179249	179271	H670Y	NA	NA	-5.991	5.991	FALSE	neProvs	YBL022C	PIM1	ATP-dependent Lon protease; involved in degradation of misfolded proteins in mitochondria; required for biogenesis and maintenance of mitochondria	0.121039	-0.041845	0.202944	-0.0977451	0.0616087	0.227109	-0.176543	-0.0705502	0.0344056	0.130116	-0.327701	0.915127	0.976216	0.986573	0.851334	0.899374	0.710751	0.960695	0.890578	0.959205	0.901092	0.778452	0
TTATACCAATCAGCAGCTAA	+	chrII	177977	177999	W1098*	NA	NA	NA	NA	FALSE	neStops	YBL022C	PIM1	ATP-dependent Lon protease; involved in degradation of misfolded proteins in mitochondria; required for biogenesis and maintenance of mitochondria	-0.176939	0.287222	0.134475	0.422356	0.150608	-0.0393913	-0.059191	0.045466	0.063736	-0.0920568	-0.0244569	0.900459	0.896338	0.990002	0.536455	0.899374	0.859151	0.999238	0.897154	0.958015	0.901092	0.95205	0
AAGATCCTATTACTAAAGAA	-	chrII	175760	175782	P584F	NA	NA	-9.518	9.518	TRUE	eProvs	YBL023C	MCM2	Protein involved in DNA replication; component of the Mcm2-7 hexameric helicase complex that binds chromatin as a part of the pre-replicative complex; relative distribution to the nucleus increases upon DNA replication stress	-0.313314	-0.162805	-0.0365936	-0.261057	0.294815	0.168382	-0.0609767	-0.295857	-0.340026	-0.17729	0.041636	0.742975	0.937294	0.997475	0.701651	0.861241	0.7589	0.997764	0.800181	0.84946	0.901092	0.944876	0
ACGGCCTGGAGGAACGGTTC	+	chrII	176324	176346	G400N	NA	NA	-5.879	5.879	TRUE	eProvs	YBL023C	MCM2	Protein involved in DNA replication; component of the Mcm2-7 hexameric helicase complex that binds chromatin as a part of the pre-replicative complex; relative distribution to the nucleus increases upon DNA replication stress	0.0721842	-0.227271	-0.0751116	0.120437	0.207806	-0.0695581	0.532337	0.490935	0.132155	0.478218	0.214115	0.925805	0.93702	0.995762	0.865724	0.899374	0.84735	0.790115	0.680902	0.944839	0.873724	0.898132	0
AGTATTTCCATTTCCAAGGC	-	chrII	175623	175645	S630F	NA	NA	-5.99	5.99	TRUE	eProvs	YBL023C	MCM2	Protein involved in DNA replication; component of the Mcm2-7 hexameric helicase complex that binds chromatin as a part of the pre-replicative complex; relative distribution to the nucleus increases upon DNA replication stress	-0.0134445	-0.406302	0.395011	0.0435245	0.399688	-0.592773	-0.0758579	0.063196	0.130758	-0.15879	0.0507384	0.942107	0.907928	0.983555	0.892952	0.863138	0.434741	0.999238	0.89526	0.944549	0.901092	0.945006	0
CGGCCTGGAGGAACGGTTCC	+	chrII	176325	176347	G400N	NA	NA	-5.879	5.879	TRUE	eProvs	YBL023C	MCM2	Protein involved in DNA replication; component of the Mcm2-7 hexameric helicase complex that binds chromatin as a part of the pre-replicative complex; relative distribution to the nucleus increases upon DNA replication stress	0.223358	0.195174	0.392665	-0.249812	0.105172	0.259487	0.0240805	0.619376	0.174169	-0.22645	0.281601	0.867146	0.936122	0.981084	0.781638	0.899374	0.708706	0.999797	0.64597	0.932867	0.901092	0.758998	0
GGATCGTACATCTATTCATG	-	chrII	175660	175682	R617C	NA	NA	-7.987	7.987	TRUE	eProvs	YBL023C	MCM2	Protein involved in DNA replication; component of the Mcm2-7 hexameric helicase complex that binds chromatin as a part of the pre-replicative complex; relative distribution to the nucleus increases upon DNA replication stress	-0.103139	-0.247514	0.143324	-0.0572305	-0.0710171	-0.00580962	-0.0292865	0.0188213	-0.104865	0.25513	0.515884	0.921248	0.925329	0.990002	0.882396	0.899491	0.870662	0.999797	0.905146	0.952922	0.901092	0.487821	0
GGTGCACGTATTAGAACATT	-	chrII	176823	176845	A229V	R230C	NA	c(-1.764, -7.231)	7.231	TRUE	eProvs	YBL023C	MCM2	Protein involved in DNA replication; component of the Mcm2-7 hexameric helicase complex that binds chromatin as a part of the pre-replicative complex; relative distribution to the nucleus increases upon DNA replication stress	0.345238	0.406689	-0.174317	-0.209927	0.0653357	0.150292	-0.109567	-0.104906	0.012363	0.00974072	0.399116	0.850929	0.836798	0.988601	0.816944	0.899374	0.820976	0.985984	0.878951	0.962502	0.905876	0.468963	0
GGTGTTCCAAAAAACGTCAA	-	chrII	175941	175963	P524L	NA	NA	-5.222	5.222	TRUE	eProvs	YBL023C	MCM2	Protein involved in DNA replication; component of the Mcm2-7 hexameric helicase complex that binds chromatin as a part of the pre-replicative complex; relative distribution to the nucleus increases upon DNA replication stress	-0.199503	-0.230222	-0.302263	0.226417	-0.367248	-0.654531	-0.00639693	0.24355	0.274922	-0.133237	-0.149965	0.907801	0.936122	0.983555	0.805008	0.85638	0.285463	0.999797	0.849158	0.899033	0.901092	0.925368	0
GTGTTCGCCGCCAACTCCGC	-	chrII	174950	174972	R854C	NA	NA	-6.306	6.306	TRUE	eProvs	YBL023C	MCM2	Protein involved in DNA replication; component of the Mcm2-7 hexameric helicase complex that binds chromatin as a part of the pre-replicative complex; relative distribution to the nucleus increases upon DNA replication stress	0.40507	-0.0497398	-0.0402229	-0.502397	0.323629	0.0143938	0.232888	-0.0816658	-0.245272	0.135962	-0.315972	0.717771	0.976216	0.997146	0.32304	0.861241	0.866269	0.941251	0.890397	0.930302	0.901092	0.807943	0
GTTACGCTCCAGGAAGCTCC	-	chrII	176343	176365	T389M	L390F	NA	c(-5.875, -3.559)	5.875	TRUE	eProvs	YBL023C	MCM2	Protein involved in DNA replication; component of the Mcm2-7 hexameric helicase complex that binds chromatin as a part of the pre-replicative complex; relative distribution to the nucleus increases upon DNA replication stress	-0.08934	0.0361122	0.0433122	-0.368913	-0.0670253	-0.13612	0.116481	0.27768	-0.209288	-0.149355	0.077068	0.9186	0.978346	0.995866	0.659911	0.904078	0.794464	0.984474	0.817561	0.925007	0.901092	0.936086	0
TGCAACTGGTCAGGGTGCTT	-	chrII	175810	175832	T567I	NA	NA	-5.996	5.996	TRUE	eProvs	YBL023C	MCM2	Protein involved in DNA replication; component of the Mcm2-7 hexameric helicase complex that binds chromatin as a part of the pre-replicative complex; relative distribution to the nucleus increases upon DNA replication stress	0.260224	0.126132	-0.120536	-0.138659	-0.285175	0.061509	-0.120829	-0.00589723	-0.288675	0.13075	0.235294	0.788455	0.9567	0.988601	0.82349	0.818481	0.837073	0.978858	0.907462	0.851209	0.901092	0.799257	0
GTTCTGGTGATGGTACCATG	+	chrII	173312	173334	S261F	NA	NA	-5.675	5.675	FALSE	neProvs	YBL024W	NCL1	S-adenosyl-L-methionine-dependent tRNA: m5C-methyltransferase; methylates cytosine to m5C at several positions in tRNAs and intron-containing pre-tRNAs; increases proportion of tRNALeu(CAA) with m5C at wobble position in response to hydrogen peroxide, causing selective translation of mRNA from genes enriched in TTG codon; loss of NCL1 confers hypersensitivity to oxidative stress; similar to Nop2p…	-0.169126	-0.0504585	0.0740602	-0.112052	0.141395	0.0023621	-0.0173123	-0.299031	-0.0392879	-0.103694	0.0428542	0.877896	0.971991	0.991672	0.835383	0.899374	0.872628	0.999797	0.758388	0.958437	0.901092	0.940685	0
CTGATCCAGACGACTTGGGA	-	chrII	169074	169096	W95*	NA	NA	NA	NA	FALSE	neStops	YBL027W	RPL19B	Ribosomal 60S subunit protein L19B; rpl19a and rpl19b single null mutations result in slow growth, while the double null mutation is lethal; homologous to mammalian ribosomal protein L19, no bacterial homolog; RPL19B has a paralog, RPL19A, that arose from the whole genome duplication	NA	0.0264513	NA	0.534982	-0.737962	-1.10402	NA	NA	NA	NA	NA	NA	0.980103	NA	0.659137	0.692523	0.0634942	NA	NA	NA	NA	NA	0
CTTCAAGCACAAGAGAGCTT	+	chrII	169199	169221	H134Y	NA	NA	-5.459	5.459	FALSE	neProvs	YBL027W	RPL19B	Ribosomal 60S subunit protein L19B; rpl19a and rpl19b single null mutations result in slow growth, while the double null mutation is lethal; homologous to mammalian ribosomal protein L19, no bacterial homolog; RPL19B has a paralog, RPL19A, that arose from the whole genome duplication	0.00306509	-0.194109	0.208752	0.442058	0.312625	0.368205	-0.306399	0.0739682	-0.134209	-0.0537228	0.263245	0.942278	0.936122	0.986305	0.376318	0.820379	0.41221	0.855798	0.890241	0.937088	0.901092	0.80662	0
AAAGAACCAGTCAACAATAG	+	chrII	163330	163352	G221N	NA	NA	-5.184	5.184	TRUE	eProvs	YBL030C	PET9	Major ADP/ATP carrier of the mitochondrial inner membrane; exchanges cytosolic ADP for mitochondrially synthesized ATP; also imports heme and ATP; required for viability in many lab strains that carry a sal1 mutation; PET9 has a paralog, AAC3, that arose from the whole genome duplication; human homolog SLC25A4 implicated in progressive external ophthalmoplegia can complement yeast null mutant	0.0508697	0.100217	-0.290318	0.379967	0.125266	-0.115097	0.0694	0.21068	0.0353174	0.263607	0.357137	0.93135	0.961926	0.983555	0.555269	0.899374	0.79927	0.999238	0.859931	0.959205	0.901092	0.623723	0
AAGAAGACCTTAAAATCTGA	-	chrII	163444	163466	T180I	NA	NA	-5.709	5.709	TRUE	eProvs	YBL030C	PET9	Major ADP/ATP carrier of the mitochondrial inner membrane; exchanges cytosolic ADP for mitochondrially synthesized ATP; also imports heme and ATP; required for viability in many lab strains that carry a sal1 mutation; PET9 has a paralog, AAC3, that arose from the whole genome duplication; human homolog SLC25A4 implicated in progressive external ophthalmoplegia can complement yeast null mutant	-0.190415	-0.321572	-0.131194	-0.538627	-0.100981	0.0193569	0.389507	0.0966484	-0.182866	-0.131059	0.032876	0.907801	0.88815	0.990002	0.400878	0.899374	0.86597	0.819557	0.890397	0.937088	0.901092	0.95091	0
AAGAGAACCGCTACACAGGA	-	chrII	163753	163775	T77I	NA	NA	-5.332	5.332	TRUE	eProvs	YBL030C	PET9	Major ADP/ATP carrier of the mitochondrial inner membrane; exchanges cytosolic ADP for mitochondrially synthesized ATP; also imports heme and ATP; required for viability in many lab strains that carry a sal1 mutation; PET9 has a paralog, AAC3, that arose from the whole genome duplication; human homolog SLC25A4 implicated in progressive external ophthalmoplegia can complement yeast null mutant	0.0770294	0.32409	0.18157	-0.038692	-0.233167	0.542324	-0.087779	0.0917013	-0.11998	-0.429477	-0.104236	0.918856	0.834567	0.988598	0.88574	0.884649	0.107621	0.99589	0.88326	0.943198	0.672728	0.923818	0
ACCACCAGATGCCAAGTTAC	+	chrII	163593	163615	G134N	NA	NA	-5.718	5.718	TRUE	eProvs	YBL030C	PET9	Major ADP/ATP carrier of the mitochondrial inner membrane; exchanges cytosolic ADP for mitochondrially synthesized ATP; also imports heme and ATP; required for viability in many lab strains that carry a sal1 mutation; PET9 has a paralog, AAC3, that arose from the whole genome duplication; human homolog SLC25A4 implicated in progressive external ophthalmoplegia can complement yeast null mutant	NA	-0.874308	-0.818789	-0.270345	0.189401	-1.4335	0.958015	0.712658	0.660857	0.909934	-1.00405	NA	0.101971	0.419198	0.778557	0.899374	7.98437e-06	0.0219583	0.654662	0.568212	0.190912	0.0234412	3
CAAGTTACCGGCAAACCATT	+	chrII	163605	163627	G129D	NA	NA	-6.356	6.356	TRUE	eProvs	YBL030C	PET9	Major ADP/ATP carrier of the mitochondrial inner membrane; exchanges cytosolic ADP for mitochondrially synthesized ATP; also imports heme and ATP; required for viability in many lab strains that carry a sal1 mutation; PET9 has a paralog, AAC3, that arose from the whole genome duplication; human homolog SLC25A4 implicated in progressive external ophthalmoplegia can complement yeast null mutant	0.284993	0.174672	-0.00900271	0.0782796	0.0764875	0.147874	0.304249	-0.0708133	0.200379	0.377794	-0.115111	0.771799	0.936122	0.9985	0.879424	0.899374	0.755568	0.897762	0.890497	0.922535	0.874843	0.921782	0
GATAACACCTTCCTGTGTAG	+	chrII	163746	163768	G82D	V83I	NA	c(-6.442, -0.021)	6.442	TRUE	eProvs	YBL030C	PET9	Major ADP/ATP carrier of the mitochondrial inner membrane; exchanges cytosolic ADP for mitochondrially synthesized ATP; also imports heme and ATP; required for viability in many lab strains that carry a sal1 mutation; PET9 has a paralog, AAC3, that arose from the whole genome duplication; human homolog SLC25A4 implicated in progressive external ophthalmoplegia can complement yeast null mutant	0.0220886	0.176866	-0.0015315	0.03646	0.285845	-0.100783	0.134942	0.315068	-0.0185762	-0.351662	-0.138147	0.939241	0.936122	0.999413	0.88457	0.802176	0.780306	0.970385	0.7827	0.961753	0.885355	0.898132	0
GGTTCTCTATTCAAGGGTTG	-	chrII	163132	163154	S283F	NA	NA	-5.481	5.481	TRUE	eProvs	YBL030C	PET9	Major ADP/ATP carrier of the mitochondrial inner membrane; exchanges cytosolic ADP for mitochondrially synthesized ATP; also imports heme and ATP; required for viability in many lab strains that carry a sal1 mutation; PET9 has a paralog, AAC3, that arose from the whole genome duplication; human homolog SLC25A4 implicated in progressive external ophthalmoplegia can complement yeast null mutant	0.202973	0.0507747	-0.272282	-0.435288	0.0253277	-0.127013	0.346334	0.177054	0.561903	-0.0226738	0.420772	0.880423	0.974472	0.983555	0.350943	0.9137	0.799869	0.855798	0.871013	0.446702	0.903529	0.541473	0
TTGAAGCCTCTATTGTTGAC	-	chrII	163336	163358	P216F	NA	NA	-10.874	10.874	TRUE	eProvs	YBL030C	PET9	Major ADP/ATP carrier of the mitochondrial inner membrane; exchanges cytosolic ADP for mitochondrially synthesized ATP; also imports heme and ATP; required for viability in many lab strains that carry a sal1 mutation; PET9 has a paralog, AAC3, that arose from the whole genome duplication; human homolog SLC25A4 implicated in progressive external ophthalmoplegia can complement yeast null mutant	0.0916287	0.144842	0.0223665	-0.0656018	0.145915	0.333701	0.191327	-0.46201	0.308986	-0.00126781	0.268083	0.91592	0.936122	0.9985	0.870434	0.897754	0.447352	0.921669	0.466055	0.84946	0.917769	0.640049	0
TTGGCATCTGGTGGTGCTGC	-	chrII	163585	163607	A132V	S133F	NA	c(-3.574, -5.67)	5.67	TRUE	eProvs	YBL030C	PET9	Major ADP/ATP carrier of the mitochondrial inner membrane; exchanges cytosolic ADP for mitochondrially synthesized ATP; also imports heme and ATP; required for viability in many lab strains that carry a sal1 mutation; PET9 has a paralog, AAC3, that arose from the whole genome duplication; human homolog SLC25A4 implicated in progressive external ophthalmoplegia can complement yeast null mutant	-0.0388506	0.161839	-0.0857167	-0.209881	0.54866	0.200144	-0.106802	0.191586	-0.103103	-0.261528	0.372839	0.934776	0.9567	0.995762	0.819151	0.650794	0.790416	0.996942	0.873873	0.944549	0.901092	0.794529	0
GGTATTTCTGAAAAGGTGCC	+	chrII	160415	160437	S80F	NA	NA	-5.823	5.823	FALSE	neProvs	YBL032W	HEK2	RNA binding protein involved in asymmetric localization of ASH1 mRNA; represses translation of ASH1 mRNA, an effect reversed by Yck1p-dependent phosphoryation; regulates telomere position effect and length; similarity to hnRNP-K	-0.354108	-0.257587	NA	0.31925	-0.364607	-0.138826	0.361251	0.401777	NA	NA	0.291927	0.850929	0.936122	NA	0.799114	0.899374	0.830059	0.947113	0.851813	NA	NA	0.898132	0
AGCTCGTATCCCAACCACAC	-	chrII	159555	159577	R41C	NA	NA	-7.744	7.744	FALSE	neProvs	YBL033C	RIB1	GTP cyclohydrolase II; catalyzes the first step of the riboflavin biosynthesis pathway	-0.0139541	-0.104203	0.120742	-0.0548719	-0.19252	0.0565497	0.0184728	-0.0735719	-0.0910815	0.32182	-0.247236	0.939576	0.9567	0.988601	0.871802	0.875057	0.842945	0.999797	0.883493	0.943198	0.819261	0.793958	0
ATAGACTCCAAGGAGATAGA	-	chrII	158807	158829	S291F	NA	NA	-5.991	5.991	FALSE	neProvs	YBL033C	RIB1	GTP cyclohydrolase II; catalyzes the first step of the riboflavin biosynthesis pathway	-0.0678789	-0.0884916	NA	-0.383413	0.430187	NA	0.155186	0.312033	NA	NA	0.263657	0.9323	0.971991	NA	0.732286	0.873018	NA	0.979642	0.849158	NA	NA	0.87395	0
CACCGGTGTAACATTCAGAA	+	chrII	159240	159262	G151S	NA	NA	-5.9	5.9	FALSE	neProvs	YBL033C	RIB1	GTP cyclohydrolase II; catalyzes the first step of the riboflavin biosynthesis pathway	NA	0.384645	0.362453	-0.200551	-0.0384719	-0.745063	0.711064	1.21411	0.310306	0.23737	-1.15789	NA	0.905163	0.983555	0.8138	0.9137	0.0599804	0.402967	0.0473478	0.906685	0.901092	0.00263691	2
GAACATCTAGCCATTGTGTT	-	chrII	159485	159507	H64Y	NA	NA	-5.808	5.808	FALSE	neProvs	YBL033C	RIB1	GTP cyclohydrolase II; catalyzes the first step of the riboflavin biosynthesis pathway	-0.375718	0.0666145	-0.445179	-0.12449	0.0250681	-0.339552	0.265087	-0.0502658	-0.176738	0.340651	-0.259032	0.825229	0.972159	0.915762	0.856152	0.913976	0.574006	0.923067	0.893096	0.937088	0.901092	0.850156	0
GAGATAACCTTCTATCTCCT	+	chrII	158800	158822	G296D	NA	NA	-6.057	6.057	FALSE	neProvs	YBL033C	RIB1	GTP cyclohydrolase II; catalyzes the first step of the riboflavin biosynthesis pathway	-0.00318388	0.0705888	-0.0335847	0.0914275	-0.0375844	-0.0158303	0.0370843	-0.340954	-0.0183865	0.122253	0.0798852	0.942278	0.968218	0.99623	0.836798	0.909757	0.863301	0.999238	0.69659	0.960526	0.901092	0.924619	0
TATCCCAACCACACAGGGTC	-	chrII	159549	159571	P43L	NA	NA	-9.647	9.647	FALSE	neProvs	YBL033C	RIB1	GTP cyclohydrolase II; catalyzes the first step of the riboflavin biosynthesis pathway	-0.136365	0.0543404	0.443983	-0.133568	-0.225507	-0.676208	0.168633	0.449356	0.0402821	0.133424	-0.294243	0.902273	0.971991	0.702637	0.812456	0.875057	0.00750529	0.941831	0.521074	0.959199	0.901092	0.671493	1
TGAAACATCCCGTGGATGCT	-	chrII	158995	159017	H228Y	NA	NA	-6	6	FALSE	neProvs	YBL033C	RIB1	GTP cyclohydrolase II; catalyzes the first step of the riboflavin biosynthesis pathway	0.0170846	0.13797	-0.417621	0.0363857	-0.282144	-0.0763199	0.0808631	0.404794	0.0578895	0.3229	-0.30178	0.939576	0.9567	0.797954	0.884436	0.862821	0.826891	0.990602	0.744016	0.958403	0.885443	0.780005	0
AAGACAATGAACGAGAATTA	+	chrII	154391	154413	C1332Y	NA	NA	-7.02	7.02	TRUE	eProvs	YBL034C	STU1	Component of the mitotic spindle; binds to interpolar microtubules via its association with beta-tubulin (Tub2p); required for interpolar microtubules to provide an outward force on the spindle poles	0.286812	-0.299111	-0.387412	0.303359	-0.104244	-0.00862747	-0.241028	-0.449605	0.319518	0.463898	0.0866957	0.825229	0.88815	0.983555	0.7326	0.899374	0.870499	0.946714	0.743164	0.895732	0.885355	0.936086	0
GATTAATCCCTTCAAAAACT	-	chrII	155263	155285	P1038S	NA	NA	-6.372	6.372	TRUE	eProvs	YBL034C	STU1	Component of the mitotic spindle; binds to interpolar microtubules via its association with beta-tubulin (Tub2p); required for interpolar microtubules to provide an outward force on the spindle poles	-0.0392344	-0.192478	-0.115035	-0.0864174	0.269859	0.130241	0.0729509	-0.0478272	0.059838	-0.100384	-0.104662	0.933337	0.936122	0.990002	0.868604	0.869472	0.807782	0.996942	0.894847	0.957553	0.901092	0.927676	0
AATGCCCTGATCTTGAAGAC	-	chrII	151577	151599	P673F	NA	NA	-10.233	10.233	TRUE	eProvs	YBL035C	POL12	B subunit of DNA polymerase alpha-primase complex; required for initiation of DNA replication during mitotic and premeiotic DNA synthesis; also functions in telomere capping and length regulation	0.162642	0.405004	0.253413	-0.0210097	-0.15791	-0.42667	-0.161744	-0.0482974	0.372793	0.199473	0.0216483	0.907483	0.552634	0.983555	0.892952	0.899374	0.493614	0.952282	0.89452	0.716717	0.901092	0.95205	0
CAATGCCCTGATCTTGAAGA	-	chrII	151578	151600	P673F	NA	NA	-10.233	10.233	TRUE	eProvs	YBL035C	POL12	B subunit of DNA polymerase alpha-primase complex; required for initiation of DNA replication during mitotic and premeiotic DNA synthesis; also functions in telomere capping and length regulation	0.421411	-0.0247937	-0.203739	-0.0368142	-0.206174	0.320659	-0.111196	0.00699863	0.294155	0.211564	0.0996426	0.178284	0.978346	0.983555	0.882396	0.863138	0.360416	0.970385	0.90687	0.766852	0.901092	0.907605	0
CAGTCCGAAATTTATGCTGT	-	chrII	152718	152740	S292F	NA	NA	-5.129	5.129	TRUE	eProvs	YBL035C	POL12	B subunit of DNA polymerase alpha-primase complex; required for initiation of DNA replication during mitotic and premeiotic DNA synthesis; also functions in telomere capping and length regulation	0.136878	0.162828	0.27849	0.0673483	0.0926636	-0.0643717	0.254919	-0.0945399	0.2014	-0.0496056	0.160935	0.881037	0.936122	0.983555	0.859158	0.899374	0.827774	0.900989	0.878505	0.911993	0.901092	0.87395	0
CCTCACGTCTTGATAATGTT	-	chrII	152313	152335	H427Y	NA	NA	-5.8	5.8	TRUE	eProvs	YBL035C	POL12	B subunit of DNA polymerase alpha-primase complex; required for initiation of DNA replication during mitotic and premeiotic DNA synthesis; also functions in telomere capping and length regulation	0.200105	-0.25214	0.198621	0.12901	-0.0365424	0.248712	0.0203104	0.0866273	0.271871	-0.0271462	-0.0678507	0.81344	0.785328	0.983555	0.8138	0.9137	0.4968	0.999238	0.873873	0.805833	0.903529	0.934801	0
CCTTCCAACAGCATAAATTT	+	chrII	152714	152736	G298K	NA	NA	-7.994	7.994	TRUE	eProvs	YBL035C	POL12	B subunit of DNA polymerase alpha-primase complex; required for initiation of DNA replication during mitotic and premeiotic DNA synthesis; also functions in telomere capping and length regulation	-0.579858	-0.0968095	-0.0532119	0.189545	0.330203	-0.0268102	0.838991	-0.14258	-0.297093	-0.0290501	-0.523341	0.265118	0.968218	0.995762	0.807039	0.655565	0.861242	0.0116974	0.872795	0.895732	0.903529	0.2335	1
CTAGAGACCTCAAGAATGGG	-	chrII	152637	152659	T320I	NA	NA	-5.355	5.355	TRUE	eProvs	YBL035C	POL12	B subunit of DNA polymerase alpha-primase complex; required for initiation of DNA replication during mitotic and premeiotic DNA synthesis; also functions in telomere capping and length regulation	0.0335227	0.149096	0.179101	-0.0943967	0.144312	0.0453882	0.443753	0.465007	-0.0430074	-0.14503	0.0433624	0.933108	0.939136	0.986305	0.853118	0.899374	0.848185	0.532447	0.654994	0.958437	0.901092	0.94001	0
CTCCCCAGTGTCCACATCGC	-	chrII	152473	152495	P374L	NA	NA	-9.533	9.533	TRUE	eProvs	YBL035C	POL12	B subunit of DNA polymerase alpha-primase complex; required for initiation of DNA replication during mitotic and premeiotic DNA synthesis; also functions in telomere capping and length regulation	-0.0741037	0.0973501	0.0583598	-0.172621	0.0898469	0.260201	0.113352	0.0950067	0.272893	0.184173	0.020624	0.907801	0.939412	0.990157	0.683448	0.899374	0.301535	0.949215	0.863129	0.677508	0.895766	0.950642	0
GACTAACAGAGTTTGTTGGT	-	chrII	151736	151758	T620I	NA	NA	-5.425	5.425	TRUE	eProvs	YBL035C	POL12	B subunit of DNA polymerase alpha-primase complex; required for initiation of DNA replication during mitotic and premeiotic DNA synthesis; also functions in telomere capping and length regulation	0.218697	0.006423	-0.0295838	0.56484	-0.124756	0.169493	0.405389	0.405185	-0.293446	-0.0290718	0.3998	0.907801	0.980348	0.9985	0.536455	0.899374	0.768944	0.82069	0.796248	0.922535	0.903529	0.803388	0
TACCACTCGCTATCAGAGGA	+	chrII	152272	152294	S445N	G446S	NA	c(-1.283, -5.583)	5.583	TRUE	eProvs	YBL035C	POL12	B subunit of DNA polymerase alpha-primase complex; required for initiation of DNA replication during mitotic and premeiotic DNA synthesis; also functions in telomere capping and length regulation	NA	0.252353	-0.187631	-0.112304	0.206592	NA	NA	-0.0989968	-0.00267355	NA	-0.358966	NA	0.942805	0.990002	0.873144	0.899374	NA	NA	0.891859	0.963142	NA	0.864713	0
TACCTTTGAATGCCACAATT	+	chrII	152554	152576	G352S	NA	NA	-6	6	TRUE	eProvs	YBL035C	POL12	B subunit of DNA polymerase alpha-primase complex; required for initiation of DNA replication during mitotic and premeiotic DNA synthesis; also functions in telomere capping and length regulation	0.202472	-0.323201	-0.0289847	-0.100451	0.0875652	-0.291436	0.155039	0.568547	-0.439119	0.258859	0.0737412	0.895646	0.874124	0.998281	0.863361	0.899374	0.681198	0.983717	0.660831	0.851209	0.901092	0.936086	0
TCCAACGCCGCCCATTCTTG	+	chrII	152630	152652	G325D	V326I	NA	c(-7, 0.7)	7	TRUE	eProvs	YBL035C	POL12	B subunit of DNA polymerase alpha-primase complex; required for initiation of DNA replication during mitotic and premeiotic DNA synthesis; also functions in telomere capping and length regulation	0.0264781	0.149846	-0.256836	-0.25901	0.374152	0.179264	0.019759	-0.124597	0.00703577	-0.0813023	-0.0506138	0.935307	0.936122	0.967712	0.675669	0.592189	0.676522	0.999797	0.864156	0.962971	0.901092	0.938025	0
CCCCGAACTCCCTCACACCA	+	chrII	151016	151038	G68R	NA	NA	-8	8	FALSE	neProvs	YBL036C	YBL036C	Putative non-specific single-domain racemase; based on structural similarity; binds pyridoxal 5'-phosphate; expression of GFP-fusion protein induced in response to the DNA-damaging agent MMS	-0.0618598	0.00359486	0.0124304	0.227357	-0.160406	-0.0709596	0.140046	-0.361233	-0.120828	0.137965	0.140024	0.918539	0.980348	0.9985	0.618371	0.875122	0.807195	0.939855	0.592797	0.932346	0.901092	0.87395	0
TGCCCAATACGAATCTGTAA	-	chrII	151151	151173	Q18*	NA	NA	NA	NA	FALSE	neStops	YBL036C	YBL036C	Putative non-specific single-domain racemase; based on structural similarity; binds pyridoxal 5'-phosphate; expression of GFP-fusion protein induced in response to the DNA-damaging agent MMS	0.225304	-0.102681	-0.161344	0.147965	-0.42389	0.354749	0.6413	-0.101273	-0.240205	-0.111757	0.0489804	0.877896	0.967033	0.990002	0.834224	0.692523	0.563891	0.419001	0.886265	0.909677	0.901092	0.945295	0
TGTTCAAGAGTTGATCGAAA	-	chrII	150986	151008	Q73*	NA	NA	NA	NA	FALSE	neStops	YBL036C	YBL036C	Putative non-specific single-domain racemase; based on structural similarity; binds pyridoxal 5'-phosphate; expression of GFP-fusion protein induced in response to the DNA-damaging agent MMS	0.352451	-0.0919842	-0.0800926	0.302609	0.0382102	-0.0765543	0.0153702	0.494667	0.255004	0.0482675	0.0795559	0.873654	0.971991	0.995762	0.687906	0.9137	0.846635	0.999797	0.756579	0.9223	0.903529	0.936086	0
TTGCCCAATACGAATCTGTA	-	chrII	151152	151174	A17V	Q18*	NA	c(-2.504, NA)	2.504	FALSE	neStops	YBL036C	YBL036C	Putative non-specific single-domain racemase; based on structural similarity; binds pyridoxal 5'-phosphate; expression of GFP-fusion protein induced in response to the DNA-damaging agent MMS	0.242621	-0.315911	-0.264055	0.431567	-0.0931017	-0.0305589	-0.0119251	-0.122037	0.0627694	-0.419372	0.112506	0.825229	0.833563	0.983555	0.511534	0.899374	0.85935	0.999797	0.876529	0.955278	0.787886	0.921782	0
ACGCAAACAGTGAAGAGGTT	+	chrII	150059	150081	Q952*	T953I	NA	c(NA, -1.025)	1.025	FALSE	neStops	YBL037W	APL3	Alpha-adaptin; large subunit of the clathrin associated protein complex (AP-2); involved in vesicle mediated transport	-0.639285	1.06423	NA	0.369269	NA	NA	-0.470631	NA	-0.601967	NA	NA	0.742594	0.318614	NA	0.806748	NA	NA	0.905916	NA	0.867729	NA	NA	0
ATTTACAACGTAAGCAACTA	+	chrII	147849	147871	Q216*	NA	NA	NA	NA	FALSE	neStops	YBL037W	APL3	Alpha-adaptin; large subunit of the clathrin associated protein complex (AP-2); involved in vesicle mediated transport	0.00122995	-0.0264313	0.245184	0.259747	0.201534	0.0986043	0.302042	0.631877	1.18477	0.19682	-0.288635	0.943928	0.980103	0.986573	0.809668	0.899374	0.841141	0.938014	0.627375	0.037611	0.901092	0.87395	1
CATCTAAGGAAATTAATATT	+	chrII	148383	148405	S393F	NA	NA	-5.467	5.467	FALSE	neProvs	YBL037W	APL3	Alpha-adaptin; large subunit of the clathrin associated protein complex (AP-2); involved in vesicle mediated transport	0.311846	-0.153644	0.0356734	-0.38875	0.315248	0.00716882	0.035175	-0.0490097	0.253455	0.0658745	-0.20917	0.78184	0.936122	0.995866	0.461358	0.863138	0.868296	0.999238	0.89283	0.890156	0.901092	0.845115	0
TACAAACCAATTGATATCCG	-	chrII	148695	148717	W501*	NA	NA	NA	NA	FALSE	neStops	YBL037W	APL3	Alpha-adaptin; large subunit of the clathrin associated protein complex (AP-2); involved in vesicle mediated transport	-0.363789	-0.599151	0.544297	0.220837	0.245236	-0.156446	0.37037	NA	0.31487	0.163969	0.625575	0.825229	0.777893	0.935051	0.834241	0.891921	0.801331	0.920019	NA	0.921143	0.901092	0.616562	0
AAGGGATCCACTTTGCAATT	+	chrII	146379	146401	S67F	NA	NA	-5.233	5.233	FALSE	neProvs	YBL038W	MRPL16	Mitochondrial ribosomal protein of the large subunit; homologous to bacterial L16 ribosomal protein; synthetic lethality with hac1 mutation suggests a possible role in synthesis of precursors for protein glycosylation	-0.0660979	0.135492	-0.378608	0.176594	0.0285794	0.0862151	0.108644	-0.249145	0.186261	0.270215	-0.222472	0.918539	0.952755	0.884221	0.778557	0.9137	0.824792	0.977262	0.79795	0.911993	0.885443	0.828775	0
ACTTTGCAATTTGGTAAGTA	+	chrII	146388	146410	Q70*	NA	NA	NA	NA	FALSE	neStops	YBL038W	MRPL16	Mitochondrial ribosomal protein of the large subunit; homologous to bacterial L16 ribosomal protein; synthetic lethality with hac1 mutation suggests a possible role in synthesis of precursors for protein glycosylation	0.724579	NA	NA	NA	NA	-0.192436	NA	NA	NA	NA	NA	0.598993	NA	NA	NA	NA	0.806539	NA	NA	NA	NA	NA	0
AGTCAAATCAAGAAGTTATA	-	chrII	144296	144318	Q472*	NA	NA	NA	NA	FALSE	neStops	YBL039C	URA7	Major CTP synthase isozyme (see also URA8); catalyzes the ATP-dependent transfer of the amide nitrogen from glutamine to UTP, forming CTP, the final step in de novo biosynthesis of pyrimidines; involved in phospholipid biosynthesis; capable of forming cytoplasmic filaments termed cytoophidium, especially during conditions of glucose depletion; URA7 has a paralog, URA8, that arose from the whole g…	NA	0.0199584	0.220469	0.0924853	0.410753	-0.323725	0.0602728	0.484634	0.225918	0.0737432	-0.254807	NA	0.980348	0.989728	0.882396	0.873018	0.700591	0.999238	0.758782	0.937088	0.903529	0.898132	0
ATTCCAATTTAAAGTTGGAA	-	chrII	145212	145234	Q167*	NA	NA	NA	NA	FALSE	neStops	YBL039C	URA7	Major CTP synthase isozyme (see also URA8); catalyzes the ATP-dependent transfer of the amide nitrogen from glutamine to UTP, forming CTP, the final step in de novo biosynthesis of pyrimidines; involved in phospholipid biosynthesis; capable of forming cytoplasmic filaments termed cytoophidium, especially during conditions of glucose depletion; URA7 has a paralog, URA8, that arose from the whole g…	0.219553	0.0437897	0.0880896	-0.0010341	0.536823	-0.103783	0.394781	0.309876	0.151695	-0.0248215	-0.31013	0.870838	0.976753	0.995762	0.902423	0.606616	0.833385	0.76904	0.846536	0.937171	0.903529	0.816181	0
ATTTCATGAAGCATGGAACA	-	chrII	144633	144655	H360Y	NA	NA	-5.278	5.278	FALSE	neProvs	YBL039C	URA7	Major CTP synthase isozyme (see also URA8); catalyzes the ATP-dependent transfer of the amide nitrogen from glutamine to UTP, forming CTP, the final step in de novo biosynthesis of pyrimidines; involved in phospholipid biosynthesis; capable of forming cytoplasmic filaments termed cytoophidium, especially during conditions of glucose depletion; URA7 has a paralog, URA8, that arose from the whole g…	0.969765	-0.141381	0.008025	0.211033	-0.283016	0.138543	-0.525072	-0.118378	0.193804	0.0663964	0.305471	0.0441607	0.956706	0.9985	0.809668	0.891921	0.819779	0.762507	0.884989	0.936445	0.901092	0.87395	1
CCAACTCAAGCTGCCATCAA	-	chrII	145127	145149	T195I	Q196*	NA	c(-5.995, NA)	5.995	FALSE	neStops	YBL039C	URA7	Major CTP synthase isozyme (see also URA8); catalyzes the ATP-dependent transfer of the amide nitrogen from glutamine to UTP, forming CTP, the final step in de novo biosynthesis of pyrimidines; involved in phospholipid biosynthesis; capable of forming cytoplasmic filaments termed cytoophidium, especially during conditions of glucose depletion; URA7 has a paralog, URA8, that arose from the whole g…	-0.0231577	0.320399	0.0878156	0.49902	0.38162	0.052335	0.0458944	-0.0244847	0.319591	0.110999	0.0609034	0.935763	0.741831	0.990002	0.203878	0.471993	0.844724	0.999238	0.900885	0.779305	0.901092	0.936086	0
TTTCATGCCTGAAATTGACA	-	chrII	144384	144406	P444S	NA	NA	-7.482	7.482	FALSE	neProvs	YBL039C	URA7	Major CTP synthase isozyme (see also URA8); catalyzes the ATP-dependent transfer of the amide nitrogen from glutamine to UTP, forming CTP, the final step in de novo biosynthesis of pyrimidines; involved in phospholipid biosynthesis; capable of forming cytoplasmic filaments termed cytoophidium, especially during conditions of glucose depletion; URA7 has a paralog, URA8, that arose from the whole g…	-0.439957	-0.100825	0.143403	-0.489197	NA	0.0198595	-0.5286	0.263402	NA	NA	0.398409	0.824206	0.971991	0.990002	0.687906	NA	0.866532	0.855798	0.859918	NA	NA	0.87395	0
AATCCTTACGGTGATAATGG	+	chrII	141310	141332	P23F	NA	NA	-10.864	10.864	TRUE	eProvs	YBL041W	PRE7	Beta 6 subunit of the 20S proteasome	0.675851	-0.621111	-0.221255	-0.0129254	-0.201682	0.0375502	1.21311	-0.367542	0.138933	-0.722992	1.18162	0.04063	0.344807	0.986573	0.892952	0.897754	0.857787	0.00055962	0.744016	0.937088	0.419268	0.00013126	3
AGACATATACAAGTGGGTGA	+	chrII	141883	141905	H214Y	NA	NA	-5.871	5.871	TRUE	eProvs	YBL041W	PRE7	Beta 6 subunit of the 20S proteasome	-0.0329545	-0.331349	0.0447874	-0.188175	0.0308573	0.0422975	-0.469724	0.437191	0.225779	0.191601	-0.376566	0.939241	0.915337	0.997475	0.818569	0.9137	0.860201	0.819557	0.804604	0.936357	0.901092	0.67067	0
GTACCACCATTATCACCGTA	-	chrII	141313	141335	G28N	G29N	NA	c(-5.928, -5.929)	5.929	TRUE	eProvs	YBL041W	PRE7	Beta 6 subunit of the 20S proteasome	0.268878	-0.607731	-0.0282654	0.133602	-0.0206188	-0.383398	0.966316	0.0728249	-0.0415314	0.521054	0.61783	0.825229	0.351078	0.9985	0.844026	0.913976	0.399819	0.00958169	0.891371	0.959205	0.857323	0.298992	1
TCTACACTGTTCTCTTTCGT	-	chrII	141692	141714	C155Y	NA	NA	-9.867	9.867	TRUE	eProvs	YBL041W	PRE7	Beta 6 subunit of the 20S proteasome	0.415233	-0.259682	-0.436038	-0.216648	-0.150732	-0.454257	0.224125	0.885524	-0.32085	0.487531	-0.481237	0.817175	0.925329	0.983555	0.834241	0.899374	0.606405	0.962965	0.451877	0.925007	0.885443	0.814144	0
TTCAATCCTTACGGTGATAA	+	chrII	141307	141329	P23F	NA	NA	-10.864	10.864	TRUE	eProvs	YBL041W	PRE7	Beta 6 subunit of the 20S proteasome	0.132374	0.113336	-0.0362558	-0.119513	0.0122694	-0.0346222	-0.0357973	-0.178797	0.216653	-0.117963	0.496184	0.887075	0.952689	0.996035	0.822419	0.913976	0.854936	0.999238	0.855324	0.906685	0.901092	0.160278	0
ACATGGCAAATCTCAGCCAC	-	chrII	139806	139828	Q147*	NA	NA	NA	NA	FALSE	neStops	YBL042C	FUI1	High affinity uridine permease, localizes to the plasma membrane; also mediates low but significant transport of the cytotoxic nucleoside analog 5-fluorouridine; not involved in uracil transport; relative distribution to the vacuole increases upon DNA replication stress	-0.0676107	0.0201969	-0.208769	0.101911	-0.191161	-0.373365	-0.261182	-0.725283	0.104974	0.0228829	-0.173461	0.932877	0.980103	0.988601	0.873144	0.899374	0.561449	0.968105	0.728351	0.949708	0.903529	0.921782	0
GATAACCAACGAAATAGTTT	+	chrII	138532	138554	G575N	NA	NA	-5.993	5.993	FALSE	neProvs	YBL042C	FUI1	High affinity uridine permease, localizes to the plasma membrane; also mediates low but significant transport of the cytotoxic nucleoside analog 5-fluorouridine; not involved in uracil transport; relative distribution to the vacuole increases upon DNA replication stress	0.346505	0.0297767	-0.640676	-0.0432635	0.0314354	-0.193492	-0.123075	-0.663211	0.10753	0.0217886	-0.081867	0.78184	0.980084	0.681772	0.882703	0.9137	0.745468	0.983717	0.574075	0.944549	0.903529	0.931832	0
GTCCCCTAGACATTCTGAAC	-	chrII	139043	139065	P400L	NA	NA	-9.477	9.477	FALSE	neProvs	YBL042C	FUI1	High affinity uridine permease, localizes to the plasma membrane; also mediates low but significant transport of the cytotoxic nucleoside analog 5-fluorouridine; not involved in uracil transport; relative distribution to the vacuole increases upon DNA replication stress	-0.251845	-0.163205	-0.0567616	-0.0663219	-0.075441	-0.063082	0.168096	-0.673727	0.0696605	0.257074	0.120619	0.759773	0.925329	0.995762	0.863361	0.899374	0.829603	0.941831	0.0887977	0.952922	0.885443	0.898132	0
TTGCCATGTATTGACGTTAA	+	chrII	139820	139842	W146*	NA	NA	NA	NA	FALSE	neStops	YBL042C	FUI1	High affinity uridine permease, localizes to the plasma membrane; also mediates low but significant transport of the cytotoxic nucleoside analog 5-fluorouridine; not involved in uracil transport; relative distribution to the vacuole increases upon DNA replication stress	0.31251	-0.147034	-0.0177733	0.0181732	0.0264111	0.077769	0.218041	0.0721484	-0.48721	-0.128451	-0.033231	0.825127	0.9567	0.9985	0.892952	0.9137	0.831861	0.960168	0.890578	0.801887	0.901092	0.95091	0
GAACCCGCTTCTAGATTACA	-	chrII	134621	134643	P293F	A294V	NA	c(-9.567, -1.32)	9.567	FALSE	neProvs	YBL045C	COR1	Core subunit of the ubiquinol-cytochrome c reductase complex; the ubiquinol-cytochrome c reductase complex (bc1 complex) is a component of the mitochondrial inner membrane electron transport chain	-0.115286	-0.435819	0.102807	0.415238	0.347278	-0.143967	-0.233977	0.0821921	0.111574	-0.115899	-0.214701	0.911455	0.66838	0.990002	0.454274	0.791133	0.76909	0.897762	0.885945	0.937088	0.901092	0.830642	0
GACCAAGATATTGCTATTGC	-	chrII	134213	134235	Q429*	NA	NA	NA	NA	FALSE	neStops	YBL045C	COR1	Core subunit of the ubiquinol-cytochrome c reductase complex; the ubiquinol-cytochrome c reductase complex (bc1 complex) is a component of the mitochondrial inner membrane electron transport chain	-0.0867416	0.323605	0.153847	0.262767	0.0380195	0.0994716	-0.618747	-0.506744	-0.556756	NA	0.0380185	0.926531	0.925329	0.990002	0.795802	0.9137	0.83647	0.747408	0.795541	0.848111	NA	0.95091	0
TAACCAGTTCAAGAGGTCTT	-	chrII	135462	135484	Q13*	NA	NA	NA	NA	FALSE	neStops	YBL045C	COR1	Core subunit of the ubiquinol-cytochrome c reductase complex; the ubiquinol-cytochrome c reductase complex (bc1 complex) is a component of the mitochondrial inner membrane electron transport chain	0.356849	0.090086	-0.592303	-0.308541	-0.253329	0.142911	-0.124028	-0.133233	0.402462	0.46356	-0.445175	0.850929	0.971991	0.932908	0.719556	0.876698	0.807782	0.989323	0.878505	0.89463	0.874905	0.629587	0
TCTCTTTCTTACAAAGATTC	-	chrII	134540	134562	L320F	S321F	NA	c(-2.238, -5.767)	5.767	FALSE	neProvs	YBL045C	COR1	Core subunit of the ubiquinol-cytochrome c reductase complex; the ubiquinol-cytochrome c reductase complex (bc1 complex) is a component of the mitochondrial inner membrane electron transport chain	-0.175289	0.578885	0.283986	0.356869	0.146763	-0.196947	0.125595	0.0871473	0.140423	0.0868003	0.0379438	0.900021	0.212021	0.983555	0.616999	0.899374	0.738032	0.974468	0.884896	0.932425	0.901092	0.947456	0
TGAGAAGCAAGAGGACGATA	+	chrII	132855	132877	Q147*	NA	NA	NA	NA	FALSE	neStops	YBL046W	PSY4	Regulatory subunit of protein phosphatase PP4; presence of Psy4p in the PP4 complex (along with catalytic subunit Pph3p and Psy2p) is required for dephosphorylation of the histone variant H2AX, but not for dephosphorylation of Rad53p, during recovery from the DNA damage checkpoint; localization is cell-cycle dependent and regulated by Cdc28p phosphorylation; required for cisplatin resistance; hom…	0.339636	0.421923	-0.0688974	-0.138395	0.0727507	-0.097935	0.134592	0.119119	-0.0819519	-0.0908282	0.331089	0.825127	0.891464	0.995762	0.851342	0.899374	0.836975	0.983717	0.889437	0.956182	0.901092	0.784118	0
AAGACAAATGAATTTAGCTA	-	chrII	129388	129410	Q879*	NA	NA	NA	NA	FALSE	neStops	YBL047C	EDE1	Scaffold protein involved in the formation of early endocytic sites; putative regulator of cytokinesis; homo-oligomerization is required for localization to and organization of endocytic sites; has a network of interactions with other endocytic proteins; binds membranes in a ubiquitin-dependent manner; may also bind ubiquitinated membrane-associated proteins; interacts with Cmk2 and functions ups…	-0.491736	-0.135606	0.179269	-0.178165	0.202252	-0.10643	-0.0410159	-0.175266	0.240739	-0.228706	-0.126226	0.534766	0.9567	0.988601	0.799318	0.897754	0.807782	0.999238	0.866393	0.900347	0.901092	0.921782	0
AGAGGAACAAGAGCAACTAA	-	chrII	130516	130538	Q504*	NA	NA	NA	NA	FALSE	neStops	YBL047C	EDE1	Scaffold protein involved in the formation of early endocytic sites; putative regulator of cytokinesis; homo-oligomerization is required for localization to and organization of endocytic sites; has a network of interactions with other endocytic proteins; binds membranes in a ubiquitin-dependent manner; may also bind ubiquitinated membrane-associated proteins; interacts with Cmk2 and functions ups…	0.242475	0.11925	0.109031	-0.143742	0.211191	0.0567397	-0.190689	0.105338	0.463023	-0.0718012	0.109603	0.863764	0.960995	0.993978	0.835383	0.898896	0.851549	0.970385	0.886265	0.765753	0.901092	0.930711	0
CTTCGGTCAAAGTATAATCA	-	chrII	130546	130568	Q494*	NA	NA	NA	NA	FALSE	neStops	YBL047C	EDE1	Scaffold protein involved in the formation of early endocytic sites; putative regulator of cytokinesis; homo-oligomerization is required for localization to and organization of endocytic sites; has a network of interactions with other endocytic proteins; binds membranes in a ubiquitin-dependent manner; may also bind ubiquitinated membrane-associated proteins; interacts with Cmk2 and functions ups…	NA	-0.228423	-0.0584363	-0.213084	-0.299947	0.276582	-0.337121	0.450684	-0.3701	NA	-0.41927	NA	0.956706	0.997312	0.826865	0.897754	0.687278	0.959415	0.791993	0.906309	NA	0.827203	0
GTTAGAACAAGCGGCTGTGG	-	chrII	128395	128417	Q1211*	NA	NA	NA	NA	FALSE	neStops	YBL047C	EDE1	Scaffold protein involved in the formation of early endocytic sites; putative regulator of cytokinesis; homo-oligomerization is required for localization to and organization of endocytic sites; has a network of interactions with other endocytic proteins; binds membranes in a ubiquitin-dependent manner; may also bind ubiquitinated membrane-associated proteins; interacts with Cmk2 and functions ups…	0.0898678	0.0965725	0.275433	-0.0503406	-0.0383925	0.336182	-0.0275342	-0.538115	-0.0797372	0.337443	-0.147283	0.927181	0.971991	0.983555	0.882585	0.9137	0.624287	0.999797	0.743517	0.955023	0.901092	0.923181	0
TGACCAAAATGTTAAACAAA	-	chrII	130054	130076	Q657*	NA	NA	NA	NA	FALSE	neStops	YBL047C	EDE1	Scaffold protein involved in the formation of early endocytic sites; putative regulator of cytokinesis; homo-oligomerization is required for localization to and organization of endocytic sites; has a network of interactions with other endocytic proteins; binds membranes in a ubiquitin-dependent manner; may also bind ubiquitinated membrane-associated proteins; interacts with Cmk2 and functions ups…	0.180392	-0.0312115	-0.0695138	-0.195018	0.0343523	0.243826	0.157353	-0.100952	0.381224	0.465736	0.107787	0.907803	0.980103	0.995762	0.807039	0.9137	0.679374	0.983717	0.884404	0.853557	0.884991	0.928647	0
TGTTAAACAAACGGAACAAC	-	chrII	130045	130067	Q661*	NA	NA	NA	NA	FALSE	neStops	YBL047C	EDE1	Scaffold protein involved in the formation of early endocytic sites; putative regulator of cytokinesis; homo-oligomerization is required for localization to and organization of endocytic sites; has a network of interactions with other endocytic proteins; binds membranes in a ubiquitin-dependent manner; may also bind ubiquitinated membrane-associated proteins; interacts with Cmk2 and functions ups…	-0.0279557	0.223173	-0.277421	0.293324	-0.415532	0.161489	0.177692	-0.26559	0.143358	0.184161	-0.311743	0.938974	0.936122	0.986497	0.733647	0.80579	0.793088	0.970385	0.847024	0.940889	0.901092	0.809075	0
ATACCACAATGAAAAAATAA	-	chrII	127420	127442	W47*	NA	NA	NA	NA	FALSE	neStops	YBL048W	RRT1	Protein of unknown function; identified in a screen for mutants with increased levels of rDNA transcription; dubious open reading frame unlikely to encode a protein, based on experimental and comparative sequence data	NA	NA	NA	NA	NA	-0.895767	NA	NA	NA	-0.201485	-0.0974512	NA	NA	NA	NA	NA	0.41576	NA	NA	NA	0.901092	0.936596	0
ATTATTTCTAGAGATTATAG	+	chrII	126999	127021	S60F	NA	NA	-5.877	5.877	FALSE	neProvs	YBL049W	MOH1	Protein of unknown function, essential for stationary phase survival; not required for growth on nonfermentable carbon sources; possibly linked with vacuolar transport	0.167355	-0.404697	0.0727991	-0.0161027	-0.156683	-0.294436	-0.019891	0.300574	-0.114593	0.259841	0.0470307	0.875625	0.575276	0.990002	0.892952	0.875122	0.527996	0.999797	0.760225	0.937088	0.882917	0.938089	0
GAGCAACGAAGAATGTTGAC	+	chrII	127080	127102	Q86*	R87*	NA	c(NA, NA)	NA	FALSE	neStops	YBL049W	MOH1	Protein of unknown function, essential for stationary phase survival; not required for growth on nonfermentable carbon sources; possibly linked with vacuolar transport	-0.0620083	0.141473	0.123276	0.00765522	-0.129648	0.291433	0.329965	-0.191414	-0.0636524	0.202309	-0.373248	0.927819	0.936122	0.990002	0.893129	0.899374	0.59523	0.855798	0.847024	0.958437	0.901092	0.712116	0
GATGATCAGCAGTATAAGGA	+	chrII	127179	127201	Q120*	NA	NA	NA	NA	FALSE	neStops	YBL049W	MOH1	Protein of unknown function, essential for stationary phase survival; not required for growth on nonfermentable carbon sources; possibly linked with vacuolar transport	0.199318	-0.0403015	0.296607	0.350816	-0.450409	0.10833	0.353915	0.331678	-0.340981	0.103909	-0.0965075	0.904906	0.979575	0.983555	0.701651	0.836263	0.833701	0.912288	0.817561	0.911818	0.901092	0.939175	0
CAGCAGTTGTACAACCTTAA	-	chrII	122997	123019	Q582*	NA	NA	NA	NA	FALSE	neStops	YBL051C	PIN4	Protein involved in G2/M phase progression and response to DNA damage; interacts with Rad53p; contains an RNA recognition motif, a nuclear localization signal, and several SQ/TQ cluster domains; hyperphosphorylated in response to DNA damage	0.0781606	0.0887137	NA	-0.0282654	-0.513185	-0.134006	-0.0513255	-0.589316	NA	0.783164	-0.44933	0.927181	0.971991	NA	0.892952	0.658584	0.83647	0.999238	0.746314	NA	0.63037	0.77506	0
CCTTTGCAGCCAAACTCCAC	-	chrII	123588	123610	Q386*	NA	NA	NA	NA	FALSE	neStops	YBL051C	PIN4	Protein involved in G2/M phase progression and response to DNA damage; interacts with Rad53p; contains an RNA recognition motif, a nuclear localization signal, and several SQ/TQ cluster domains; hyperphosphorylated in response to DNA damage	0.0518818	0.160254	0.381467	-0.0243704	-0.140411	-0.0647046	-0.151899	0.236007	0.190535	0.249193	-0.354984	0.923601	0.930985	0.837662	0.892327	0.897754	0.835601	0.947113	0.791883	0.908161	0.895766	0.304235	0
TTCCCAATTATTGTTATTTA	-	chrII	123811	123833	Q311*	NA	NA	NA	NA	FALSE	neStops	YBL051C	PIN4	Protein involved in G2/M phase progression and response to DNA damage; interacts with Rad53p; contains an RNA recognition motif, a nuclear localization signal, and several SQ/TQ cluster domains; hyperphosphorylated in response to DNA damage	0.354043	-0.150684	-0.180539	0.60455	0.263962	-0.115193	0.127055	-0.242889	0.377807	0.198017	-0.139509	0.825229	0.9567	0.988601	0.350919	0.891921	0.817248	0.985984	0.850073	0.861525	0.901092	0.921782	0
AACTCCTGAAAAACCATTGT	-	chrII	120506	120528	P451F	NA	NA	-11	11	FALSE	neProvs	YBL052C	SAS3	Histone acetyltransferase catalytic subunit of NuA3 complex; acetylates histone H3, involved in transcriptional silencing; homolog of the mammalian MOZ proto-oncogene; mutant has aneuploidy tolerance; sas3gcn5 double mutation is lethal	0.287307	0.383035	0.182876	-0.196562	-0.00651013	-0.0270674	-0.0891513	0.0640801	0.0788106	0.220687	-0.0378126	0.757381	0.798144	0.986305	0.753368	0.921745	0.859544	0.986028	0.890497	0.951416	0.901092	0.945006	0
AATCCAAACACAACGTCTGT	+	chrII	120325	120347	G516K	NA	NA	-7.767	7.767	FALSE	neProvs	YBL052C	SAS3	Histone acetyltransferase catalytic subunit of NuA3 complex; acetylates histone H3, involved in transcriptional silencing; homolog of the mammalian MOZ proto-oncogene; mutant has aneuploidy tolerance; sas3gcn5 double mutation is lethal	-0.00898278	-0.142179	0.338809	-0.690904	0.388274	0.137354	0.181531	-0.343702	0.276736	-0.199454	0.258572	0.942094	0.9567	0.983555	0.349595	0.724465	0.770756	0.962847	0.75658	0.890937	0.901092	0.828775	0
ATACCAACAGACGTTGTGTT	-	chrII	120328	120350	P510L	T511I	NA	c(-7.767, -5.1)	7.767	FALSE	neProvs	YBL052C	SAS3	Histone acetyltransferase catalytic subunit of NuA3 complex; acetylates histone H3, involved in transcriptional silencing; homolog of the mammalian MOZ proto-oncogene; mutant has aneuploidy tolerance; sas3gcn5 double mutation is lethal	-0.144413	0.14567	0.274139	0.174654	-0.13435	-0.1698	0.130821	-0.491922	0.394699	0.398556	-0.255666	0.889699	0.945005	0.983555	0.781638	0.899374	0.747854	0.981837	0.613511	0.779305	0.865595	0.828775	0
ATATACCAGAGGAAAGGATA	-	chrII	120583	120605	Q426*	NA	NA	NA	NA	FALSE	neStops	YBL052C	SAS3	Histone acetyltransferase catalytic subunit of NuA3 complex; acetylates histone H3, involved in transcriptional silencing; homolog of the mammalian MOZ proto-oncogene; mutant has aneuploidy tolerance; sas3gcn5 double mutation is lethal	NA	NA	NA	NA	NA	NA	NA	NA	NA	NA	0.0228799	NA	NA	NA	NA	NA	NA	NA	NA	NA	NA	0.952416	0
CTACCCATATACCAGAGGAA	-	chrII	120589	120611	P423F	NA	NA	-11	11	FALSE	neProvs	YBL052C	SAS3	Histone acetyltransferase catalytic subunit of NuA3 complex; acetylates histone H3, involved in transcriptional silencing; homolog of the mammalian MOZ proto-oncogene; mutant has aneuploidy tolerance; sas3gcn5 double mutation is lethal	0.239306	0.156297	-0.156838	0.218094	0.213315	0.131058	-0.350552	-0.0486193	0.156426	0.223914	0.179889	0.808403	0.936122	0.988601	0.741086	0.883123	0.787543	0.855798	0.893096	0.933999	0.901092	0.880388	0
GGGCCGTCATTTGGTATAAA	-	chrII	120124	120146	P578L	S579L	NA	c(-10, -5.867)	10	FALSE	neProvs	YBL052C	SAS3	Histone acetyltransferase catalytic subunit of NuA3 complex; acetylates histone H3, involved in transcriptional silencing; homolog of the mammalian MOZ proto-oncogene; mutant has aneuploidy tolerance; sas3gcn5 double mutation is lethal	0.282458	0.299561	0.0754688	0.101788	-0.0149938	0.145525	-0.0379059	-0.328435	-0.00745141	0.161	0.0558102	0.757381	0.822298	0.990002	0.844026	0.9137	0.762311	0.999238	0.765204	0.962971	0.901092	0.939175	0
AGCCACAACACACGAAACCA	+	chrII	118214	118236	P210L	Q211*	NA	c(-1.705, NA)	1.705	FALSE	neStops	YBL054W	TOD6	PAC motif binding protein involved in rRNA and ribosome biogenesis; subunit of the RPD3L histone deacetylase complex; Myb-like HTH transcription factor; hypophosphorylated by rapamycin treatment in a Sch9p-dependent manner; activated in stochastic pulses of nuclear localization	0.0907793	0.0268935	0.173774	-0.142007	-0.0967028	0.230627	0.386506	-0.124281	0.0997351	-0.196738	0.283584	0.918856	0.980103	0.988601	0.842356	0.899374	0.700122	0.819557	0.878505	0.947889	0.901092	0.826198	0
ACCTTTCAGCTACAAAAGTT	-	chrII	116057	116079	Q253*	NA	NA	NA	NA	FALSE	neStops	YBL055C	YBL055C	3'-->5' exonuclease and endonuclease with a possible role in apoptosis; has similarity to mammalian and C. elegans apoptotic nucleases	0.18484	-0.338047	-0.414165	0.29999	0.0381225	0.013952	-0.0820821	0.304175	0.199995	0.358341	-0.0646561	0.905134	0.896338	0.983555	0.691516	0.9137	0.866269	0.996942	0.834334	0.932346	0.901092	0.940156	0
TCATCCAGATAGAAAACTAG	-	chrII	116004	116026	P270L	NA	NA	-5.9	5.9	FALSE	neProvs	YBL055C	YBL055C	3'-->5' exonuclease and endonuclease with a possible role in apoptosis; has similarity to mammalian and C. elegans apoptotic nucleases	0.104719	-0.215435	-0.0995068	-0.0282939	0.0461556	-0.0227911	-0.193266	-0.166836	-0.296001	-0.099332	-0.220415	0.907801	0.889334	0.990002	0.891723	0.899374	0.861865	0.920019	0.846661	0.845001	0.901092	0.808737	0
TCTCGTATTGTAGCTGCTGA	+	chrII	114263	114285	R169C	NA	NA	-7.988	7.988	FALSE	neProvs	YBL056W	PTC3	Type 2C protein phosphatase (PP2C); dephosphorylates Hog1p (see also Ptc2p) to limit maximal kinase activity induced by osmotic stress; dephosphorylates T169 phosphorylated Cdc28p (see also Ptc2p); role in DNA damage checkpoint inactivation; PTC3 has a paralog, PTC2, that arose from the whole genome duplication	0.237599	-0.0954927	0.31411	-0.295961	0.0352452	-0.0435594	-0.322053	-0.328907	-0.153288	-0.138195	-0.0395682	0.877896	0.970484	0.983555	0.677533	0.9137	0.859544	0.912973	0.790867	0.937088	0.901092	0.945006	0
ACCCAATTATGACACAAAGA	-	chrII	113017	113039	P131L	NA	NA	-6.376	6.376	FALSE	neProvs	YBL057C	PTH2	One of two mitochondrially-localized peptidyl-tRNA hydrolases; negatively regulates the ubiquitin-proteasome pathway via interactions with ubiquitin-like ubiquitin-associated proteins; dispensable for cell growth; see also PTH1	-0.0477396	0.145161	-0.0377656	-0.353144	-0.00286689	-0.160568	0.0113284	0.270758	0.0629219	0.247255	-0.0704249	0.93135	0.9567	0.996807	0.555269	0.923365	0.747854	0.999797	0.835256	0.958403	0.901092	0.936086	0
AGCAGGTCCTAAACCCAATA	+	chrII	112849	112871	G191E	NA	NA	-7.733	7.733	FALSE	neProvs	YBL057C	PTH2	One of two mitochondrially-localized peptidyl-tRNA hydrolases; negatively regulates the ubiquitin-proteasome pathway via interactions with ubiquitin-like ubiquitin-associated proteins; dispensable for cell growth; see also PTH1	-0.0956599	-0.195706	0.000756653	-0.0620107	0.0359982	0.0865469	-0.209606	-0.0579846	-0.192265	-0.0759248	0.10253	0.910479	0.907928	0.999413	0.87382	0.9137	0.811687	0.906672	0.890397	0.907998	0.901092	0.914781	0
AGCCATCTTTGTGTCATAAT	+	chrII	113015	113037	R136K	W137*	NA	c(-2.9, NA)	2.9	FALSE	neStops	YBL057C	PTH2	One of two mitochondrially-localized peptidyl-tRNA hydrolases; negatively regulates the ubiquitin-proteasome pathway via interactions with ubiquitin-like ubiquitin-associated proteins; dispensable for cell growth; see also PTH1	0.0659009	-0.133018	-0.183638	-0.0197247	-0.0303108	-0.165651	-0.117434	-0.0357934	-0.0383323	0.382897	-0.207602	0.921387	0.9567	0.986724	0.892952	0.9137	0.747707	0.985984	0.897825	0.959205	0.85512	0.835502	0
TATACCTGGAGAAGTTAGGA	-	chrII	113157	113179	P85F	NA	NA	-10.333	10.333	FALSE	neProvs	YBL057C	PTH2	One of two mitochondrially-localized peptidyl-tRNA hydrolases; negatively regulates the ubiquitin-proteasome pathway via interactions with ubiquitin-like ubiquitin-associated proteins; dispensable for cell growth; see also PTH1	0.208616	0.510007	-0.197312	-0.0294222	0.187688	0.242376	0.0223109	0.254542	0.602593	0.319504	-0.055001	0.902273	0.873207	0.988601	0.892952	0.899374	0.732865	0.999797	0.857328	0.690346	0.901092	0.945295	0
ACCTCTTCCAGTAAACCTAT	-	chrII	112029	112051	G203E	R204K	NA	c(-7.981, 0.631)	7.981	FALSE	neProvs	YBL058W	SHP1	UBX domain-containing substrate adaptor for Cdc48p; ubiquitin regulatory X domain-containing protein that acts as a substrate recruiting cofactor for Cdc48p; positively regulates Glc7p PPase activity to promote growth and mitotic progression in complex with Cdc48p; ubiquitinated protein interactor involved in ER-associated degradation (ERAD); regulated by nuclear Ub-dependent degradation (INMAD p…	0.189616	0.399501	0.150884	-0.187422	0.103097	0.310979	-0.21633	-0.398926	0.0773243	-0.0589824	-0.0129046	0.854459	0.693596	0.988598	0.807039	0.899374	0.459475	0.941496	0.749325	0.952922	0.901092	0.952099	0
CCACCAGCAAAAGTATTTCT	-	chrII	111869	111891	A150T	G151N	NA	c(-2.508, -5.99)	5.99	FALSE	neProvs	YBL058W	SHP1	UBX domain-containing substrate adaptor for Cdc48p; ubiquitin regulatory X domain-containing protein that acts as a substrate recruiting cofactor for Cdc48p; positively regulates Glc7p PPase activity to promote growth and mitotic progression in complex with Cdc48p; ubiquitinated protein interactor involved in ER-associated degradation (ERAD); regulated by nuclear Ub-dependent degradation (INMAD p…	-0.130934	0.115755	0.0146118	-0.132309	-0.104844	0.125482	0.19247	-0.19782	0.0669776	-0.172361	0.0674754	0.907483	0.9567	0.9985	0.822621	0.899374	0.759759	0.944036	0.846661	0.957553	0.901092	0.936086	0
GGTCAAATGGGCGCTGAAAA	+	chrII	111974	111996	Q181*	NA	NA	NA	NA	FALSE	neStops	YBL058W	SHP1	UBX domain-containing substrate adaptor for Cdc48p; ubiquitin regulatory X domain-containing protein that acts as a substrate recruiting cofactor for Cdc48p; positively regulates Glc7p PPase activity to promote growth and mitotic progression in complex with Cdc48p; ubiquitinated protein interactor involved in ER-associated degradation (ERAD); regulated by nuclear Ub-dependent degradation (INMAD p…	0.707079	NA	0.0639791	-0.374743	0.0289957	0.600328	-0.35359	0.123495	NA	0.0577601	NA	0.525192	NA	0.995866	0.694285	0.9137	0.354998	0.938944	0.887965	NA	0.903529	NA	0
GTTCAATATCTCTCTGAATT	+	chrII	111506	111528	Q25*	NA	NA	NA	NA	FALSE	neStops	YBL058W	SHP1	UBX domain-containing substrate adaptor for Cdc48p; ubiquitin regulatory X domain-containing protein that acts as a substrate recruiting cofactor for Cdc48p; positively regulates Glc7p PPase activity to promote growth and mitotic progression in complex with Cdc48p; ubiquitinated protein interactor involved in ER-associated degradation (ERAD); regulated by nuclear Ub-dependent degradation (INMAD p…	-0.169869	0.165368	0.398058	0.0212939	-0.226318	-0.00545373	0.383651	0.417639	-0.145465	-0.0262575	0.472641	0.886562	0.936122	0.954291	0.892952	0.88791	0.870869	0.808249	0.736257	0.937088	0.903529	0.408344	0
TCAGGCCAGGGCCAAAGACT	+	chrII	112355	112377	Q309*	NA	NA	NA	NA	FALSE	neStops	YBL058W	SHP1	UBX domain-containing substrate adaptor for Cdc48p; ubiquitin regulatory X domain-containing protein that acts as a substrate recruiting cofactor for Cdc48p; positively regulates Glc7p PPase activity to promote growth and mitotic progression in complex with Cdc48p; ubiquitinated protein interactor involved in ER-associated degradation (ERAD); regulated by nuclear Ub-dependent degradation (INMAD p…	-0.271096	0.220403	0.359308	0.189507	0.448173	-0.166876	0.717583	0.287217	0.0096567	-0.163636	-0.18274	0.849841	0.905163	0.939701	0.799114	0.471993	0.74985	0.0964387	0.817554	0.962607	0.901092	0.87395	0
TGCTCAGGAACAACCCATGC	+	chrII	112435	112457	Q335*	NA	NA	NA	NA	FALSE	neStops	YBL058W	SHP1	UBX domain-containing substrate adaptor for Cdc48p; ubiquitin regulatory X domain-containing protein that acts as a substrate recruiting cofactor for Cdc48p; positively regulates Glc7p PPase activity to promote growth and mitotic progression in complex with Cdc48p; ubiquitinated protein interactor involved in ER-associated degradation (ERAD); regulated by nuclear Ub-dependent degradation (INMAD p…	-0.0511092	0.18618	0.641169	-0.024462	0.0291574	0.125815	0.0890079	0.17408	-0.18854	0.162652	0.54146	0.933108	0.9567	0.847835	0.892952	0.9137	0.824797	0.997766	0.874295	0.937088	0.901092	0.391597	0
ACTCAGATGACACGATTCTT	+	chrII	110795	110817	Q69*	NA	NA	NA	NA	FALSE	neStops	YBL059W	YBL059W	Putative protein of unknown function; the authentic, non-tagged protein is detected in highly purified mitochondria in high-throughput studies; YBL059W has a paralog, YER093C-A, that arose from the whole genome duplication	-0.0902131	0.30179	-0.172502	-0.270832	0.135086	0.193053	-0.00188122	0.398225	-0.0481294	0.0418632	-0.0815321	0.915127	0.809385	0.986305	0.587601	0.897754	0.669046	0.999797	0.629105	0.957361	0.903529	0.923471	0
CACACACAAAAGAGTCTTGC	+	chrII	111002	111024	T115I	Q116*	NA	c(-0.797, NA)	0.797	FALSE	neStops	YBL059W	YBL059W	Putative protein of unknown function; the authentic, non-tagged protein is detected in highly purified mitochondria in high-throughput studies; YBL059W has a paralog, YER093C-A, that arose from the whole genome duplication	NA	NA	0.137086	-0.431738	-0.0834852	0.0885483	NA	-0.264035	-0.133263	NA	-0.266703	NA	NA	0.990002	0.684042	0.899374	0.847426	NA	0.859918	0.949708	NA	0.898132	0
GTGCAAGATAATATAATTAT	+	chrII	109384	109406	Q486*	NA	NA	NA	NA	FALSE	neStops	YBL060W	YEL1	Guanine nucleotide exchange factor specific for Arf3p; localized to the bud neck and tip; required for localization of Arf3p to the bud neck and tip	-0.537971	-0.22831	0.041294	-0.283948	0.0783687	0.116814	0.264093	-0.494858	-0.416501	-0.137232	0.370976	0.199367	0.907928	0.996329	0.724789	0.899374	0.818839	0.925101	0.654906	0.77722	0.901092	0.702414	0
TATCCATATACCAAGCTGTC	-	chrII	109796	109818	W628*	NA	NA	NA	NA	FALSE	neStops	YBL060W	YEL1	Guanine nucleotide exchange factor specific for Arf3p; localized to the bud neck and tip; required for localization of Arf3p to the bud neck and tip	0.186283	-0.11494	-0.0190625	-0.00362683	-0.103194	-0.419434	0.0650653	0.0664422	0.0762207	0.017457	-0.00241655	0.825229	0.94141	0.9985	0.896157	0.899374	0.151834	0.98997	0.88433	0.944549	0.903529	0.953669	0
TGATACAGTCCATAAACTTG	-	chrII	109542	109564	C543Y	NA	NA	-6.913	6.913	FALSE	neProvs	YBL060W	YEL1	Guanine nucleotide exchange factor specific for Arf3p; localized to the bud neck and tip; required for localization of Arf3p to the bud neck and tip	-0.023482	-0.0617414	0.155825	0.0979826	0.219226	-0.00634006	-0.0729995	-0.43902	0.129272	-0.195057	0.100534	0.93822	0.971991	0.988601	0.862814	0.878088	0.869268	0.995213	0.581905	0.937088	0.901092	0.928062	0
ACAGTCAAACAAGTAACGTA	-	chrII	105670	105692	Q574*	NA	NA	NA	NA	FALSE	neStops	YBL061C	SKT5	Activator of Chs3p (chitin synthase III) during vegetative growth; recruits Chs3p to the bud neck via interaction with Bni4p; SKT5 has a paralog, SHC1, that arose from the whole genome duplication	0.15763	0.114778	0.152122	-0.105577	0.229146	-0.184708	-0.0825589	-0.367847	-0.312511	-0.395192	-0.0443803	0.909144	0.961955	0.988601	0.850263	0.875122	0.773064	0.996942	0.743517	0.890156	0.863056	0.945006	0
GACAGTCAAACAAGTAACGT	-	chrII	105671	105693	Q574*	NA	NA	NA	NA	FALSE	neStops	YBL061C	SKT5	Activator of Chs3p (chitin synthase III) during vegetative growth; recruits Chs3p to the bud neck via interaction with Bni4p; SKT5 has a paralog, SHC1, that arose from the whole genome duplication	0.0955263	0.393758	0.110217	0.243654	0.152107	0.303485	-0.0573326	-0.140987	-0.128494	-0.144306	-0.0121925	0.918539	0.740449	0.990002	0.707908	0.899374	0.558395	0.998452	0.870778	0.937088	0.901092	0.952099	0
GCCCAATACTTATTAGCGGA	-	chrII	106568	106590	Q274*	NA	NA	NA	NA	FALSE	neStops	YBL061C	SKT5	Activator of Chs3p (chitin synthase III) during vegetative growth; recruits Chs3p to the bud neck via interaction with Bni4p; SKT5 has a paralog, SHC1, that arose from the whole genome duplication	0.530763	0.330548	0.0472268	0.299352	0.630504	0.300836	-0.0402612	-0.261082	-0.0537249	-0.205442	-0.199896	0.504842	0.886811	0.996807	0.757544	0.558486	0.669046	0.999238	0.849158	0.959205	0.901092	0.898132	0
TTATTCATTCTACGGCAGAA	-	chrII	106332	106354	S353L	NA	NA	-5.033	5.033	FALSE	neProvs	YBL061C	SKT5	Activator of Chs3p (chitin synthase III) during vegetative growth; recruits Chs3p to the bud neck via interaction with Bni4p; SKT5 has a paralog, SHC1, that arose from the whole genome duplication	0.050798	0.117537	-0.118507	0.00268987	-0.178073	-0.0334878	-0.164261	0.0426142	-0.155744	-0.315646	0.588883	0.93228	0.960805	0.990002	0.898913	0.897754	0.860201	0.970385	0.894971	0.932346	0.901092	0.275771	0
TTTCAAGCAGCTGCAAAGCA	-	chrII	106493	106515	Q299*	A300V	NA	c(NA, -3.097)	3.097	FALSE	neStops	YBL061C	SKT5	Activator of Chs3p (chitin synthase III) during vegetative growth; recruits Chs3p to the bud neck via interaction with Bni4p; SKT5 has a paralog, SHC1, that arose from the whole genome duplication	-0.0719563	0.216762	NA	0.181648	-0.0786587	0.131868	NA	-0.195113	-0.495586	NA	-0.232309	0.9323	0.9567	NA	0.834241	0.899374	0.824797	NA	0.878505	0.886188	NA	0.921782	0
AAAACAATTTCAGATTTATA	+	chrII	104879	104901	Q1000*	NA	NA	NA	NA	FALSE	neStops	YBL063W	KIP1	Kinesin-related motor protein; required for mitotic spindle assembly, chromosome segregation, and 2 micron plasmid partitioning; functionally redundant with Cin8p for chromosomal but not plasmid functions	0.0517184	0.19796	-0.000425172	0.497105	NA	0.809738	-0.444754	0.317951	0.616552	NA	-0.108245	0.933108	0.956706	0.999591	0.568417	NA	0.286599	0.905916	0.862773	0.780084	NA	0.936086	0
AGTAAATCAGTCTTTATCGA	+	chrII	103130	103152	Q418*	NA	NA	NA	NA	FALSE	neStops	YBL063W	KIP1	Kinesin-related motor protein; required for mitotic spindle assembly, chromosome segregation, and 2 micron plasmid partitioning; functionally redundant with Cin8p for chromosomal but not plasmid functions	0.172691	0.30553	0.516335	0.13356	-0.135259	-0.147026	-0.334417	0.201121	-0.499144	0.220321	0.182786	0.915775	0.925329	0.928386	0.864195	0.899374	0.801175	0.919645	0.871544	0.79811	0.901092	0.907146	0
GATGAATCAGATGAACGAAC	+	chrII	103745	103767	Q623*	NA	NA	NA	NA	FALSE	neStops	YBL063W	KIP1	Kinesin-related motor protein; required for mitotic spindle assembly, chromosome segregation, and 2 micron plasmid partitioning; functionally redundant with Cin8p for chromosomal but not plasmid functions	-0.0395246	-0.228858	-0.229962	-0.494341	NA	0.156407	NA	0.0114545	-0.0363885	0.0580609	-0.0141796	0.936319	0.9567	0.988601	0.727401	NA	0.824797	NA	0.907462	0.961681	0.903529	0.953669	0
CTTGCAATTGACTGACAAGG	-	chrII	100508	100530	Q211*	NA	NA	NA	NA	FALSE	neStops	YBL064C	PRX1	Mitochondrial peroxiredoxin with thioredoxin peroxidase activity; has a role in reduction of hydroperoxides; reactivation requires Trr2p and glutathione; induced during respiratory growth and oxidative stress; phosphorylated; protein abundance increases in response to DNA replication stress	NA	0.0385307	0.24106	0.190412	0.0271288	0.120509	0.317875	NA	-0.290657	-0.112199	0.379325	NA	0.980084	0.988601	0.831554	0.913976	0.821866	0.942136	NA	0.925007	0.901092	0.870476	0
AGCCAATATAATCTGTATAC	+	chrII	100137	100159	Q60*	NA	NA	NA	NA	FALSE	neStops	YBL065W	YBL065W	Dubious open reading frame; unlikely to encode a functional protein, based on available experimental and comparative sequence data; partially overlaps verified ORF SEF1/YBL066C; YBL065W is a non-essential gene	0.375125	0.427299	-0.201749	-0.13852	0.537819	NA	0.208621	0.0692442	NA	NA	NA	0.825229	0.907928	0.990002	0.853118	0.863138	NA	0.984474	0.898029	NA	NA	NA	0
GAGCCAATATAATCTGTATA	+	chrII	100136	100158	Q60*	NA	NA	NA	NA	FALSE	neStops	YBL065W	YBL065W	Dubious open reading frame; unlikely to encode a functional protein, based on available experimental and comparative sequence data; partially overlaps verified ORF SEF1/YBL066C; YBL065W is a non-essential gene	-0.0357835	0.0158197	-0.196921	0.136688	0.172609	-0.0865932	-0.413854	-0.378957	-0.250848	NA	NA	0.937585	0.980348	0.990002	0.864992	0.899374	0.851486	0.908321	0.824439	0.932346	NA	NA	0
GCTGCCTGTTTCCCCGAGCA	+	chrII	97428	97450	G895N	NA	NA	-5.995	5.995	FALSE	neProvs	YBL066C	SEF1	Putative transcription factor; has homolog in Kluyveromyces lactis	0.432037	-0.242658	-0.0503663	-0.116972	-0.174318	0.0695656	0.036671	-0.0600206	-0.201253	0.0148007	0.0406762	0.493484	0.833563	0.995762	0.818641	0.885221	0.830159	0.999238	0.886265	0.906734	0.903529	0.942021	0
TAAACCATCAGGACTGGAAG	+	chrII	98355	98377	G586N	NA	NA	-5.867	5.867	FALSE	neProvs	YBL066C	SEF1	Putative transcription factor; has homolog in Kluyveromyces lactis	-0.35477	-0.0913482	0.0728766	-0.387736	0.425631	-0.330662	0.458148	0.469629	0.468673	0.237179	-0.42045	0.825229	0.971991	0.995762	0.642027	0.837277	0.589951	0.819557	0.694678	0.835794	0.901092	0.733201	0
TAGAAATCAGTTAACTGCGT	-	chrII	97943	97965	Q720*	NA	NA	NA	NA	FALSE	neStops	YBL066C	SEF1	Putative transcription factor; has homolog in Kluyveromyces lactis	-0.262744	-0.0978223	0.55293	-0.481299	0.033084	0.277731	0.0320761	-0.316913	-0.641829	0.0426435	0.0228368	0.878257	0.971991	0.913821	0.671717	0.9137	0.697601	0.999797	0.853439	0.735315	0.903529	0.952099	0
TCGCATCTGGAGCAAGGATG	+	chrII	99874	99896	R79K	C80Y	NA	c(-2.97, -10.892)	10.892	FALSE	neProvs	YBL066C	SEF1	Putative transcription factor; has homolog in Kluyveromyces lactis	0.0948643	-0.093847	0.0227448	-0.114903	-0.137303	0.160917	0.11081	0.0760423	0.0623201	0.129937	0.0832166	0.918433	0.958104	0.9985	0.834241	0.898896	0.703492	0.975412	0.884896	0.955461	0.901092	0.928362	0
GGATTTCCCCATAGAAGTTC	-	chrII	94355	94377	P505S	NA	NA	-5.327	5.327	FALSE	neProvs	YBL067C	UBP13	Ubiquitin-specific protease that cleaves Ub-protein fusions; UBP13 has a paralog, UBP9, that arose from the whole genome duplication	0.110831	-0.23472	0.587035	0.134114	-0.211138	0.141823	0.264429	-0.159362	-0.0604276	0.1605	0.129264	0.9186	0.936122	0.72835	0.842018	0.899374	0.797989	0.940053	0.878505	0.959205	0.901092	0.92712	0
GTTTACATAGGGAAACATAA	+	chrII	94007	94029	C624Y	NA	NA	-10.979	10.979	FALSE	neProvs	YBL067C	UBP13	Ubiquitin-specific protease that cleaves Ub-protein fusions; UBP13 has a paralog, UBP9, that arose from the whole genome duplication	-0.275048	-1.09717	-0.18927	0.530371	-0.285979	-0.401952	-0.656357	0.00927174	0.474454	0.196132	-0.487767	0.878257	0.170257	0.990002	0.534048	0.894547	0.580623	0.550072	0.907462	0.848179	0.901092	0.641916	0
ACCCTTGAATTTGGGAGGCA	-	chrII	92836	92858	G148R	NA	NA	-7.823	7.823	FALSE	neProvs	YBL068W	PRS4	5-phospho-ribosyl-1(alpha)-pyrophosphate synthetase, synthesizes PRPP; which is required for nucleotide, histidine, and tryptophan biosynthesis; one of five related enzymes, which are active as heteromultimeric complexes; PRS4 has a paralog, PRS2, that arose from the whole genome duplication; a missense mutation in the conserved residue R196 of its human homolog PRPS1 is pathogenic	0.0650117	-0.262231	-0.0772597	-0.0979867	0.00324024	-0.0874391	-0.0903239	-0.0796396	0.00207684	0.223263	0.294233	0.921387	0.886811	0.995762	0.844026	0.923269	0.819779	0.985984	0.888217	0.963142	0.901092	0.767275	0
AGAGAGGCAAAAAGCTAACG	+	chrII	93028	93050	Q208*	NA	NA	NA	NA	FALSE	neStops	YBL068W	PRS4	5-phospho-ribosyl-1(alpha)-pyrophosphate synthetase, synthesizes PRPP; which is required for nucleotide, histidine, and tryptophan biosynthesis; one of five related enzymes, which are active as heteromultimeric complexes; PRS4 has a paralog, PRS2, that arose from the whole genome duplication; a missense mutation in the conserved residue R196 of its human homolog PRPS1 is pathogenic	0.0057917	0.161336	0.0389575	0.073091	0.171496	-0.141533	-0.399196	-0.162077	-0.0705459	0.0749357	0.261234	0.942127	0.943609	0.995866	0.870434	0.899374	0.770915	0.819557	0.862773	0.955023	0.901092	0.827908	0
GAAAAACCCTTGAATTTGGG	-	chrII	92841	92863	G148E	NA	NA	-7.823	7.823	FALSE	neProvs	YBL068W	PRS4	5-phospho-ribosyl-1(alpha)-pyrophosphate synthetase, synthesizes PRPP; which is required for nucleotide, histidine, and tryptophan biosynthesis; one of five related enzymes, which are active as heteromultimeric complexes; PRS4 has a paralog, PRS2, that arose from the whole genome duplication; a missense mutation in the conserved residue R196 of its human homolog PRPS1 is pathogenic	0.190386	-0.0174408	-0.1817	0.539708	0.115667	-0.189586	0.270768	-0.329965	0.362943	0.342079	0.147943	0.880627	0.980103	0.988598	0.394154	0.899374	0.733812	0.921669	0.796655	0.841762	0.885443	0.921782	0
GGCGCCCATTACCGCAAAGT	+	chrII	92761	92783	P118F	NA	NA	-10.037	10.037	FALSE	neProvs	YBL068W	PRS4	5-phospho-ribosyl-1(alpha)-pyrophosphate synthetase, synthesizes PRPP; which is required for nucleotide, histidine, and tryptophan biosynthesis; one of five related enzymes, which are active as heteromultimeric complexes; PRS4 has a paralog, PRS2, that arose from the whole genome duplication; a missense mutation in the conserved residue R196 of its human homolog PRPS1 is pathogenic	0.00961635	0.168181	-0.153814	-0.153416	0.238751	-0.107218	-0.0133734	-0.153371	0.0667124	-0.173754	-0.0498592	0.942127	0.9567	0.989463	0.840299	0.899374	0.82805	0.999797	0.874184	0.957553	0.901092	0.945512	0
ATCCCACGGCCAAATGAGGG	-	chrII	91157	91179	V145I	G146R	NA	c(-0.274, -7.666)	7.666	FALSE	neProvs	YBL069W	AST1	Lipid raft associated protein; interacts with the plasma membrane ATPase Pma1p and has a role in its targeting to the plasma membrane by influencing its incorporation into lipid rafts; sometimes classified in the medium-chain dehydrogenase/reductases (MDRs) superfamily; AST1 has a paralog, AST2, that arose from the whole genome duplication	-0.0900102	-0.0989417	-0.383967	-0.21484	-0.266282	-0.185844	0.164016	-0.215385	-0.18856	-0.0278671	-0.461335	0.918539	0.967033	0.9236	0.80325	0.884317	0.746703	0.978357	0.835783	0.930302	0.903529	0.385204	0
ATTGTTCAACGTTTGCCTCT	-	chrII	90720	90742	Q64*	NA	NA	NA	NA	FALSE	neStops	YBL070C	YBL070C	Dubious open reading frame; unlikely to encode a functional protein, based on available experimental and comparative sequence data	0.166676	0.0756723	0.133754	-0.01517	-0.276213	0.0238754	-0.274172	-0.0244911	-0.0701543	0.0270135	-0.0181425	0.867318	0.968562	0.988601	0.892952	0.828716	0.859544	0.855798	0.899491	0.95429	0.903529	0.951814	0
AGCAACGCAAGCAGAAAAGA	+	chrII	90283	90305	C81Y	V82I	NA	c(-11, -1)	11	FALSE	neProvs	YBL071C	YBL071C	Putative protein of unknown function; conserved among S. cerevisiae strains; YBL071C is not an essential gene	0.157401	0.370795	0.600214	0.100003	0.373668	0.453129	-0.427277	0.206796	0.0960192	-0.021384	0.122561	0.9091	0.889334	0.767411	0.864195	0.862821	0.544062	0.829604	0.862343	0.955518	0.903529	0.928647	0
GTTTCATATACGTTATTTAC	-	chrII	89526	89548	H5Y	NA	NA	-6	6	FALSE	neProvs	YBL071C-B	YBL071C-B	Putative protein of unknown function; identified by gene-trapping, microarray-based expression analysis, and genome-wide homology searching	NA	0.186833	-0.344055	-0.196949	-0.146199	-0.388567	-0.457136	0.788427	-0.859941	-0.206529	-0.388102	NA	0.957647	0.986305	0.842875	0.899374	0.651296	0.855798	0.564534	0.352212	0.901092	0.828775	0
ATCTCCACAGGGACAAGGAT	-	chrII	90042	90064	C27Y	G28K	NA	c(-11, -8)	11	FALSE	neProvs	YBL071W-A	KTI11	Zn-ribbon protein that co-purifies with Dph1 and Dph2; in a complex required for synthesis of diphthamide on translation factor eEF2 and with Elongator subunits Iki3p, Elp2p, and Elp3p; involved in modification of wobble nucleosides in tRNAs; forms a stable heterodimer with Ats1p	NA	NA	NA	NA	-0.460266	-0.850181	NA	NA	NA	NA	NA	NA	NA	NA	NA	0.875057	0.422689	NA	NA	NA	NA	NA	0
ATTCACTCTGTTAGAACTAG	-	chrII	88977	88999	H44Y	S45F	NA	c(-5.914, -1.115)	5.914	FALSE	neProvs	YBL072C	RPS8A	Protein component of the small (40S) ribosomal subunit; homologous to mammalian ribosomal protein S8, no bacterial homolog; RPS8A has a paralog, RPS8B, that arose from the whole genome duplication	-0.222496	0.260652	0.269472	0.468152	-0.303082	-0.0710555	0.0501105	0.368033	0.0519662	-0.236545	-0.558231	0.907801	0.936122	0.988601	0.649512	0.897754	0.846635	0.999238	0.831107	0.959205	0.901092	0.586882	0
CAACCAGCCAACACCAAGAT	-	chrII	89010	89032	P33L	A34V	NA	c(-6.127, -3.897)	6.127	FALSE	neProvs	YBL072C	RPS8A	Protein component of the small (40S) ribosomal subunit; homologous to mammalian ribosomal protein S8, no bacterial homolog; RPS8A has a paralog, RPS8B, that arose from the whole genome duplication	-0.113261	-0.0571551	0.0971297	-0.10663	-0.109845	-0.0987551	0.137619	-0.161492	0.061919	0.130405	-0.0747102	0.91629	0.971991	0.990002	0.835383	0.899374	0.820056	0.973255	0.861388	0.957553	0.901092	0.935406	0
AGCCCCATGTCCCAGCGATA	+	chrII	87816	87838	P59L	NA	NA	-6.667	6.667	TRUE	eProvs	YBL073W	YBL073W	Dubious open reading frame; unlikely to encode a functional protein, based on available experimental and comparative sequence data; partially overlaps the essential gene AAR2/YBL074C	-0.226863	-0.173255	-0.0652095	0.111278	-0.0250445	-0.163876	0.0572009	-0.318249	-0.00400671	0.0525152	0.16454	0.822269	0.925329	0.995054	0.834241	0.9137	0.679449	0.997292	0.723276	0.962971	0.901092	0.87395	0
CACGAACACGAATATTTCAA	-	chrII	87877	87899	C83Y	NA	NA	-7.333	7.333	TRUE	eProvs	YBL073W	YBL073W	Dubious open reading frame; unlikely to encode a functional protein, based on available experimental and comparative sequence data; partially overlaps the essential gene AAR2/YBL074C	-0.17847	0.296714	-0.0165826	-0.296776	0.089992	0.139048	0.159601	-0.77726	-0.0475758	0.0297738	-0.257668	0.900208	0.878625	0.9985	0.7121	0.899374	0.791935	0.981837	0.366298	0.959205	0.903529	0.850776	0
AAGGCCTGGCCATGAAATGG	-	chrII	87201	87223	P191F	NA	NA	-6.4	6.4	TRUE	eProvs	YBL074C	AAR2	Component of the U5 snRNP complex; required for splicing of U3 precursors; originally described as a splicing factor specifically required for splicing pre-mRNA of the MATa1 cistron	0.139976	0.277468	-0.0372917	0.320502	-0.0759227	-0.273892	-0.268134	-0.00159902	0.187932	0.2324	-0.00934403	0.907801	0.833563	0.995866	0.603584	0.899374	0.576788	0.890486	0.907462	0.922535	0.901092	0.952099	0
CACAACCCTACCATTGTTGG	-	chrII	86744	86766	P344F	NA	NA	-9.137	9.137	TRUE	eProvs	YBL074C	AAR2	Component of the U5 snRNP complex; required for splicing of U3 precursors; originally described as a splicing factor specifically required for splicing pre-mRNA of the MATa1 cistron	0.663506	-0.271449	0.129896	0.101501	0.518711	0.379395	0.491756	0.177578	-0.491402	0.100473	-0.0268692	0.252105	0.925329	0.990002	0.863718	0.840174	0.587763	0.818454	0.876293	0.859156	0.901092	0.95205	0
CGTCTCAGGAAACCATTGAC	-	chrII	84715	84737	S572F	Q573*	NA	c(0.101, NA)	0.101	FALSE	neStops	YBL075C	SSA3	ATPase involved in protein folding and the response to stress; plays a role in SRP-dependent cotranslational protein-membrane targeting and translocation; member of the heat shock protein 70 (HSP70) family; localized to the cytoplasm; SSA3 has a paralog, SSA4, that arose from the whole genome duplication	-0.0933177	-0.346959	-0.0112097	-0.0679496	-0.0711294	0.191352	0.0407018	-0.333953	-0.263704	-0.16432	-0.288923	0.919237	0.875386	0.9985	0.882396	0.899491	0.755568	0.999797	0.804604	0.937088	0.901092	0.847074	0
TTCTCAAAGACAAGCCACTA	-	chrII	85977	85999	Q152*	NA	NA	NA	NA	FALSE	neStops	YBL075C	SSA3	ATPase involved in protein folding and the response to stress; plays a role in SRP-dependent cotranslational protein-membrane targeting and translocation; member of the heat shock protein 70 (HSP70) family; localized to the cytoplasm; SSA3 has a paralog, SSA4, that arose from the whole genome duplication	0.22165	0.381776	-0.00327876	0.100588	-0.0915068	0.0188254	-0.156921	0.512927	-0.059905	-0.305465	0.277554	0.850929	0.792807	0.998814	0.848774	0.899374	0.86597	0.969132	0.654662	0.958437	0.899577	0.780005	0
AAAAACTCCATTGAAGACTT	-	chrII	81705	81727	T847I	P848S	NA	c(-4.169, -7.964)	7.964	TRUE	eProvs	YBL076C	ILS1	Cytoplasmic isoleucine-tRNA synthetase; target of the G1-specific inhibitor reveromycin A	-0.163383	-0.0146929	-0.137706	-0.0324291	-0.0897146	-0.31244	0.278128	-0.256999	0.0661284	0.110173	0.0654092	0.866065	0.980103	0.988601	0.884794	0.899374	0.425119	0.874996	0.798846	0.951669	0.901092	0.935001	0
AATTCCATCCAAGCAAGGTA	-	chrII	82713	82735	P511L	NA	NA	-9.971	9.971	TRUE	eProvs	YBL076C	ILS1	Cytoplasmic isoleucine-tRNA synthetase; target of the G1-specific inhibitor reveromycin A	0.167502	0.327821	0.176271	0.106575	-0.246812	-0.36514	0.127338	0.135682	-0.163513	-0.0535435	0.0860139	0.873654	0.740449	0.986305	0.835911	0.863138	0.394354	0.972403	0.863987	0.922535	0.901092	0.936086	0
ACACATAACGACAAATTGGA	+	chrII	83552	83574	C236Y	NA	NA	-5.668	5.668	TRUE	eProvs	YBL076C	ILS1	Cytoplasmic isoleucine-tRNA synthetase; target of the G1-specific inhibitor reveromycin A	NA	-0.362499	-0.276731	-0.344133	0.291397	-0.0784237	0.443001	0.943574	0.126025	-0.185305	-0.225487	NA	0.85085	0.986305	0.694578	0.875057	0.844786	0.827749	0.503939	0.944549	0.901092	0.873984	0
AGAAAAACTATTGGTCGTTT	-	chrII	83849	83871	T133I	NA	NA	-5.489	5.489	TRUE	eProvs	YBL076C	ILS1	Cytoplasmic isoleucine-tRNA synthetase; target of the G1-specific inhibitor reveromycin A	-0.248937	0.166076	0.0338751	0.104898	0.00415183	-0.130589	0.0730803	-0.0491417	-0.091958	0.419563	-0.0820185	0.825229	0.9567	0.997896	0.842875	0.922863	0.776435	0.992485	0.893789	0.945199	0.764109	0.933011	0
ATTCACATTTGTCCGTGCCA	-	chrII	81954	81976	T764I	NA	NA	-5.071	5.071	TRUE	eProvs	YBL076C	ILS1	Cytoplasmic isoleucine-tRNA synthetase; target of the G1-specific inhibitor reveromycin A	0.116607	-0.109806	0.06027	0.0137474	0.207233	0.206862	0.0750059	-0.500528	0.0687275	-0.0625	0.0954251	0.912924	0.970536	0.995762	0.892952	0.891921	0.727193	0.995796	0.617111	0.957553	0.901092	0.927676	0
ATTTAATCGTCGTCGTTTGA	-	chrII	82032	82054	R739C	NA	NA	-7.964	7.964	TRUE	eProvs	YBL076C	ILS1	Cytoplasmic isoleucine-tRNA synthetase; target of the G1-specific inhibitor reveromycin A	-0.0211801	0.317287	-0.0104081	-0.17461	0.00147677	0.0715904	0.0696719	0.154529	-0.171742	-0.282564	-0.346399	0.939576	0.864121	0.9985	0.826779	0.923551	0.843838	0.996942	0.863129	0.930165	0.895766	0.675064	0
CGCTCCCGCTTTCGGTGAAG	-	chrII	83265	83287	P327F	NA	NA	-10.975	10.975	TRUE	eProvs	YBL076C	ILS1	Cytoplasmic isoleucine-tRNA synthetase; target of the G1-specific inhibitor reveromycin A	-0.0235581	0.652177	0.00817474	-0.186988	0.0781945	-0.340623	0.197854	0.243808	0.161521	-0.0834635	-0.0986661	0.936554	0.112653	0.9985	0.738258	0.899374	0.377376	0.951607	0.817554	0.924709	0.901092	0.924619	0
CGTTTCCAGAAATAGATATT	-	chrII	82869	82891	S459F	NA	NA	-5.749	5.749	TRUE	eProvs	YBL076C	ILS1	Cytoplasmic isoleucine-tRNA synthetase; target of the G1-specific inhibitor reveromycin A	-0.756029	-1.97754	-1.52461	-0.46681	-0.41002	-1.08493	-0.560753	0.190553	-0.568717	-1.18695	-0.323783	0.0659658	7.97957e-15	3.90504e-07	0.42432	0.688266	8.51949e-05	0.482923	0.862773	0.602059	0.0171293	0.780005	4
CTGGGTTCCTAACACCATCA	-	chrII	82935	82957	P438S	NA	NA	-8	8	TRUE	eProvs	YBL076C	ILS1	Cytoplasmic isoleucine-tRNA synthetase; target of the G1-specific inhibitor reveromycin A	0.254204	-0.336099	0.17958	0.143219	-0.173045	0.0152499	0.154073	-0.157057	0.16871	-0.219803	0.29183	0.810603	0.855752	0.986724	0.834241	0.897754	0.865947	0.962965	0.862247	0.932215	0.901092	0.730952	0
GATGGGCCTCCATTTGCCAC	-	chrII	84110	84132	P46F	NA	NA	-10.383	10.383	TRUE	eProvs	YBL076C	ILS1	Cytoplasmic isoleucine-tRNA synthetase; target of the G1-specific inhibitor reveromycin A	-0.35793	-0.41245	-0.124848	-0.417603	0.130092	-0.449836	-0.264108	0.284359	-0.374354	-0.228434	-0.150529	0.781598	0.8234	0.990002	0.47963	0.899374	0.471249	0.938944	0.832439	0.832545	0.901092	0.921782	0
GCCACCGGTACTCCTCATTA	-	chrII	84095	84117	T50I	NA	NA	-5.664	5.664	TRUE	eProvs	YBL076C	ILS1	Cytoplasmic isoleucine-tRNA synthetase; target of the G1-specific inhibitor reveromycin A	-1.19707	-1.5718	-0.989678	-0.020081	-0.326698	-1.21764	-0.689696	NA	NA	NA	-0.557483	0.0594909	0.0114542	0.503353	0.892952	0.897754	0.0170748	0.801336	NA	NA	NA	0.740959	2
GGAGTACCGGTGGCAAATGG	+	chrII	84104	84126	G51N	NA	NA	-5.664	5.664	TRUE	eProvs	YBL076C	ILS1	Cytoplasmic isoleucine-tRNA synthetase; target of the G1-specific inhibitor reveromycin A	NA	NA	NA	-1.46418	-1.76664	NA	NA	0.744547	NA	NA	NA	NA	NA	NA	0.0370311	0.00482676	NA	NA	0.744016	NA	NA	NA	2
GGGGTACTCCAATTCCTTTA	-	chrII	82849	82871	T466I	NA	NA	-5.838	5.838	TRUE	eProvs	YBL076C	ILS1	Cytoplasmic isoleucine-tRNA synthetase; target of the G1-specific inhibitor reveromycin A	0.11602	-0.1865	-0.0460314	-0.346683	-0.0237272	-0.927429	-0.71612	0.376508	-0.217062	-0.0246749	-0.0627356	0.918585	0.936122	0.997896	0.721299	0.913976	0.0455073	0.418318	0.791883	0.937088	0.903529	0.940156	1
GGGTACTCCAATTCCTTTAT	-	chrII	82848	82870	T466I	P467S	NA	c(-5.838, -8)	8	TRUE	eProvs	YBL076C	ILS1	Cytoplasmic isoleucine-tRNA synthetase; target of the G1-specific inhibitor reveromycin A	-0.0569265	-0.102688	-0.496012	0.0216139	0.185569	-0.198039	-0.0189843	0.435846	0.0174896	0.49049	0.314078	0.930791	0.957671	0.767411	0.892952	0.89638	0.706711	0.999797	0.69501	0.961765	0.723162	0.780005	0
GTTCATAACGCTCCCGCTTT	-	chrII	83273	83295	H324Y	NA	NA	-5.767	5.767	TRUE	eProvs	YBL076C	ILS1	Cytoplasmic isoleucine-tRNA synthetase; target of the G1-specific inhibitor reveromycin A	-0.203119	-0.599987	-0.314772	-0.312178	0.122578	-0.108883	-0.38618	0.159866	-0.40922	-0.211349	0.318852	0.877896	0.311486	0.983555	0.669635	0.899374	0.821197	0.852291	0.864156	0.822337	0.901092	0.779667	0
GTTTCCAGAAATAGATATTG	-	chrII	82868	82890	S459F	NA	NA	-5.749	5.749	TRUE	eProvs	YBL076C	ILS1	Cytoplasmic isoleucine-tRNA synthetase; target of the G1-specific inhibitor reveromycin A	-1.00413	NA	NA	0.317032	-0.490821	-1.27285	-0.179866	NA	NA	-1.05219	NA	0.267124	NA	NA	0.799114	0.837277	0.0671861	0.986028	NA	NA	0.292259	NA	0
TCCAACAGAATGGATAGGAA	+	chrII	83055	83077	C401Y	NA	NA	-11	11	TRUE	eProvs	YBL076C	ILS1	Cytoplasmic isoleucine-tRNA synthetase; target of the G1-specific inhibitor reveromycin A	NA	-0.669048	NA	NA	0.27516	NA	NA	1.33454	NA	NA	NA	NA	0.803484	NA	NA	0.899374	NA	NA	0.449052	NA	NA	NA	0
TTTAATCGTCGTCGTTTGAA	-	chrII	82031	82053	R739C	NA	NA	-7.964	7.964	TRUE	eProvs	YBL076C	ILS1	Cytoplasmic isoleucine-tRNA synthetase; target of the G1-specific inhibitor reveromycin A	-0.390879	-0.266814	0.171236	-0.852275	-0.152096	-0.0292156	0.284249	0.266653	-0.289519	-0.0853045	0.0681946	0.778729	0.907928	0.989728	0.0790679	0.899374	0.863301	0.941251	0.850067	0.921009	0.901092	0.94001	0
ATATCCATTTGAAAAAAGGA	-	chrII	80686	80708	P10L	NA	NA	-7.244	7.244	FALSE	neProvs	YBL078C	ATG8	Component of autophagosomes and Cvt vesicles; regulator of Atg1p, targets it to autophagosomes; binds the Atg1p-Atg13p complex, triggering its vacuolar degradation; unique ubiquitin-like protein whose conjugation target is lipid phosphatidylethanolamine (PE); Atg8p-PE is anchored to membranes, is involved in phagophore expansion, and may mediate membrane fusion during autophagosome formation; dec…	0.234816	0.225866	0.295029	0.165621	0.0335331	-0.0392047	-0.0779962	0.740322	-0.51709	-0.0228498	-0.22065	0.902273	0.9567	0.986305	0.860225	0.913976	0.86223	0.997292	0.654227	0.805833	0.903745	0.921782	0
ACTACATCAACAACAGGAAC	+	chrII	76701	76723	H483Y	Q484*	NA	c(-0.836, NA)	0.836	FALSE	neStops	YBL079W	NUP170	Subunit of inner ring of nuclear pore complex (NPC); contributes to NPC assembly and nucleocytoplasmic transport; interacts with genomic regions that contain ribosomal protein and subtelomeric genes, where it functions in nucleosome positioning and as a repressor of transcription; both Nup170p and NUP157p are similar to human Nup155p; NUP170 has a paralog, NUP157, that arose from the whole genome…	NA	0.0904927	NA	-0.155911	NA	-0.751003	-0.365504	-0.346863	-0.22873	NA	-0.885008	NA	0.971991	NA	0.854328	NA	0.289379	0.952282	0.850073	0.937088	NA	0.127263	0
ATGGTACAGTCCATAAAGGA	+	chrII	77953	77975	Q901*	NA	NA	NA	NA	FALSE	neStops	YBL079W	NUP170	Subunit of inner ring of nuclear pore complex (NPC); contributes to NPC assembly and nucleocytoplasmic transport; interacts with genomic regions that contain ribosomal protein and subtelomeric genes, where it functions in nucleosome positioning and as a repressor of transcription; both Nup170p and NUP157p are similar to human Nup155p; NUP170 has a paralog, NUP157, that arose from the whole genome…	-0.657715	NA	NA	-0.5075	0.020892	-0.827494	NA	NA	NA	-1.52248	NA	0.743924	NA	NA	0.76302	0.91756	0.415536	NA	NA	NA	0.0474724	NA	1
CAACCAATACCTTGGTTTCA	+	chrII	78027	78049	Q925*	NA	NA	NA	NA	FALSE	neStops	YBL079W	NUP170	Subunit of inner ring of nuclear pore complex (NPC); contributes to NPC assembly and nucleocytoplasmic transport; interacts with genomic regions that contain ribosomal protein and subtelomeric genes, where it functions in nucleosome positioning and as a repressor of transcription; both Nup170p and NUP157p are similar to human Nup155p; NUP170 has a paralog, NUP157, that arose from the whole genome…	-0.206358	0.0516311	-0.0694485	-0.140783	-0.0799609	0.442746	0.396331	-0.500486	-0.12088	-0.0997166	0.0645353	0.877896	0.978254	0.995762	0.840565	0.899374	0.493189	0.902212	0.747276	0.946272	0.901092	0.942399	0
GCACCATAATTTAAGACGAA	-	chrII	77260	77282	G674N	NA	NA	-5.987	5.987	FALSE	neProvs	YBL079W	NUP170	Subunit of inner ring of nuclear pore complex (NPC); contributes to NPC assembly and nucleocytoplasmic transport; interacts with genomic regions that contain ribosomal protein and subtelomeric genes, where it functions in nucleosome positioning and as a repressor of transcription; both Nup170p and NUP157p are similar to human Nup155p; NUP170 has a paralog, NUP157, that arose from the whole genome…	0.095769	0.00489286	-0.213918	0.12752	-0.189287	-0.045239	0.22361	0.0467533	-0.445021	0.0173339	0.116839	0.909144	0.980348	0.983555	0.807124	0.878788	0.84735	0.890486	0.890578	0.446845	0.903529	0.898132	0
GCTTGTCAATATGTGGCAAA	+	chrII	78496	78518	Q1082*	NA	NA	NA	NA	FALSE	neStops	YBL079W	NUP170	Subunit of inner ring of nuclear pore complex (NPC); contributes to NPC assembly and nucleocytoplasmic transport; interacts with genomic regions that contain ribosomal protein and subtelomeric genes, where it functions in nucleosome positioning and as a repressor of transcription; both Nup170p and NUP157p are similar to human Nup155p; NUP170 has a paralog, NUP157, that arose from the whole genome…	0.20988	0.162536	-0.304265	-0.236097	-0.442029	-0.0936218	-0.377593	0.162352	0.318111	-0.305172	-0.437645	0.907803	0.971991	0.983555	0.77008	0.833834	0.844759	0.864161	0.878505	0.904926	0.901092	0.823292	0
GTACCATTCGTGAATTAACC	-	chrII	79604	79626	W1455*	NA	NA	NA	NA	FALSE	neStops	YBL079W	NUP170	Subunit of inner ring of nuclear pore complex (NPC); contributes to NPC assembly and nucleocytoplasmic transport; interacts with genomic regions that contain ribosomal protein and subtelomeric genes, where it functions in nucleosome positioning and as a repressor of transcription; both Nup170p and NUP157p are similar to human Nup155p; NUP170 has a paralog, NUP157, that arose from the whole genome…	0.184369	-0.136257	-0.458648	0.286603	-0.328452	-0.31322	0.0282742	0.250621	-0.192227	0.0809979	0.181752	0.902273	0.9567	0.913642	0.691722	0.869472	0.652046	0.999797	0.850073	0.932346	0.901092	0.898132	0
GTTTCTATATTCATAACAGC	+	chrII	79495	79517	S1414F	NA	NA	-5.056	5.056	FALSE	neProvs	YBL079W	NUP170	Subunit of inner ring of nuclear pore complex (NPC); contributes to NPC assembly and nucleocytoplasmic transport; interacts with genomic regions that contain ribosomal protein and subtelomeric genes, where it functions in nucleosome positioning and as a repressor of transcription; both Nup170p and NUP157p are similar to human Nup155p; NUP170 has a paralog, NUP157, that arose from the whole genome…	0.0676166	-0.317169	-0.119132	0.521102	-0.300491	0.123978	-0.15991	0.0802702	0.307964	0.296397	-0.475763	0.932184	0.865327	0.990002	0.555269	0.875122	0.818029	0.976326	0.891371	0.895732	0.901092	0.444423	0
ACGAAGCCAGGGACGTATAA	-	chrII	73120	73142	Q521*	NA	NA	NA	NA	FALSE	neStops	YBL080C	PET112	Subunit of the trimeric GatFAB AmidoTransferase(AdT) complex; involved in the formation of Q-tRNAQ; mutation is functionally complemented by the bacterial GatB ortholog	-0.676719	-0.057444	-0.0246303	-0.569684	0.115076	0.349069	0.289601	-0.194593	-0.00650945	-0.077491	0.289844	0.385043	0.973678	0.9985	0.446619	0.899374	0.558942	0.891718	0.86675	0.962971	0.901092	0.828775	0
TTGCAGATAGAGCAGGACAC	-	chrII	74217	74239	Q154*	NA	NA	NA	NA	FALSE	neStops	YBL080C	PET112	Subunit of the trimeric GatFAB AmidoTransferase(AdT) complex; involved in the formation of Q-tRNAQ; mutation is functionally complemented by the bacterial GatB ortholog	0.706249	-0.173292	-0.683072	-0.021692	-0.897782	0.26464	0.0977052	-0.0665278	-0.202201	0.302029	-0.37279	0.667246	0.9567	0.796467	0.892952	0.552663	0.72752	0.999238	0.89452	0.943604	0.901092	0.831977	0
TTTGTCGCAGAACGAGGACA	+	chrII	71895	71917	S12L	Q13*	NA	c(-5.819, NA)	5.819	FALSE	neStops	YBL081W	YBL081W	Non-essential protein of unknown function; null mutation results in a decrease in plasma membrane electron transport	-0.0414392	-0.145361	0.230986	0.333523	0.229015	0.312704	-0.18295	0.190069	0.194929	-0.025683	-0.124186	0.9337	0.9567	0.983555	0.673019	0.887548	0.587763	0.949215	0.849158	0.932425	0.903529	0.921782	0
ACATCTACCACCGTGGTGTG	-	chrII	70662	70684	P151S	NA	NA	-7.1	7.1	FALSE	neProvs	YBL082C	ALG3	Dolichol-P-Man dependent alpha(1-3) mannosyltransferase; involved in synthesis of dolichol-linked oligosaccharide donor for N-linked glycosylation of proteins; G353A missense mutation in human ortholog ALG3 implicated in carbohydrate deficient glycoprotein syndrome type IV, which is characterized by microcephaly, severe epilepsy, minimal psychomotor development, partial deficiency of sialic acids…	0.328889	-0.0536308	-0.240966	0.216916	0.538972	-0.0997088	0.0532634	0.306847	-0.49114	-0.0299731	0.119645	0.828457	0.977007	0.988598	0.824233	0.688266	0.828578	0.999238	0.839139	0.886186	0.903529	0.924619	0
CTCTCAGGTGAGTGGTGGAA	-	chrII	70836	70858	Q92*	NA	NA	NA	NA	FALSE	neStops	YBL082C	ALG3	Dolichol-P-Man dependent alpha(1-3) mannosyltransferase; involved in synthesis of dolichol-linked oligosaccharide donor for N-linked glycosylation of proteins; G353A missense mutation in human ortholog ALG3 implicated in carbohydrate deficient glycoprotein syndrome type IV, which is characterized by microcephaly, severe epilepsy, minimal psychomotor development, partial deficiency of sialic acids…	0.711401	0.402596	0.0274792	0.362857	-0.273527	-0.00577505	0.437127	0.487499	0.455005	-0.155169	-0.278536	0.474207	0.866027	0.9985	0.753368	0.897691	0.871865	0.858653	0.75658	0.834842	0.901092	0.898132	0
GGGAAGACCATAAATCGGGC	+	chrII	70128	70150	W331*	NA	NA	NA	NA	FALSE	neStops	YBL082C	ALG3	Dolichol-P-Man dependent alpha(1-3) mannosyltransferase; involved in synthesis of dolichol-linked oligosaccharide donor for N-linked glycosylation of proteins; G353A missense mutation in human ortholog ALG3 implicated in carbohydrate deficient glycoprotein syndrome type IV, which is characterized by microcephaly, severe epilepsy, minimal psychomotor development, partial deficiency of sialic acids…	-0.0263516	-0.176143	0.105385	NA	-0.10894	0.392253	NA	0.283733	0.42735	NA	0.0364021	0.939576	0.9567	0.995762	NA	0.899374	0.718211	NA	0.843393	0.906685	NA	0.951814	0
TCCTGCCACAGATCCAGCGG	+	chrII	71045	71067	W26*	NA	NA	NA	NA	FALSE	neStops	YBL082C	ALG3	Dolichol-P-Man dependent alpha(1-3) mannosyltransferase; involved in synthesis of dolichol-linked oligosaccharide donor for N-linked glycosylation of proteins; G353A missense mutation in human ortholog ALG3 implicated in carbohydrate deficient glycoprotein syndrome type IV, which is characterized by microcephaly, severe epilepsy, minimal psychomotor development, partial deficiency of sialic acids…	0.213087	-0.534903	-0.182808	0.118385	0.0886682	0.3233	0.614433	-0.0883909	0.540118	0.382982	-0.326423	0.877896	0.718822	0.988601	0.859158	0.899374	0.670178	0.608789	0.891371	0.675634	0.885443	0.816181	0
TGCACTCTATTTACGTGCTA	-	chrII	70615	70637	S166F	NA	NA	-6	6	FALSE	neProvs	YBL082C	ALG3	Dolichol-P-Man dependent alpha(1-3) mannosyltransferase; involved in synthesis of dolichol-linked oligosaccharide donor for N-linked glycosylation of proteins; G353A missense mutation in human ortholog ALG3 implicated in carbohydrate deficient glycoprotein syndrome type IV, which is characterized by microcephaly, severe epilepsy, minimal psychomotor development, partial deficiency of sialic acids…	0.134094	-0.0690279	0.0257532	-0.18923	0.229954	0.419483	-0.0182037	-0.319611	-0.32796	0.292159	0.099883	0.907483	0.971991	0.9985	0.741083	0.863235	0.240026	0.999797	0.769843	0.779305	0.885443	0.921782	0
CAGCATTACAATGCATATTA	-	chrII	67608	67630	H607Y	NA	NA	-5.991	5.991	TRUE	eProvs	YBL084C	CDC27	Subunit of the Anaphase-Promoting Complex/Cyclosome (APC/C); APC/C is a ubiquitin-protein ligase required for degradation of anaphase inhibitors, including mitotic cyclins, during the metaphase/anaphase transition	0.0978301	-0.386081	0.0459381	-0.0776091	0.149674	-0.274249	-0.0659085	0.0788952	-0.139043	-0.341288	0.0221072	0.911485	0.760547	0.995762	0.861637	0.897754	0.580623	0.992639	0.88281	0.937088	0.790795	0.951527	0
GCTAACTGTTGCTATGAATT	-	chrII	67228	67250	T734I	NA	NA	-5.786	5.786	TRUE	eProvs	YBL084C	CDC27	Subunit of the Anaphase-Promoting Complex/Cyclosome (APC/C); APC/C is a ubiquitin-protein ligase required for degradation of anaphase inhibitors, including mitotic cyclins, during the metaphase/anaphase transition	-0.0462845	0.300137	-0.717164	0.0612847	-0.359646	-0.234235	0.231545	-0.0857671	0.0287248	0.0917429	-0.113054	0.934776	0.905163	0.330929	0.882396	0.799667	0.720077	0.952282	0.889437	0.960526	0.901092	0.934728	0
GCTGTGGCATTTGCATGACA	-	chrII	67879	67901	H518Y	NA	NA	-5.991	5.991	TRUE	eProvs	YBL084C	CDC27	Subunit of the Anaphase-Promoting Complex/Cyclosome (APC/C); APC/C is a ubiquitin-protein ligase required for degradation of anaphase inhibitors, including mitotic cyclins, during the metaphase/anaphase transition	0.106709	0.16847	0.186339	0.296054	-0.044953	-0.300265	-0.47168	0.45547	0.176075	-0.128829	0.309614	0.918539	0.9567	0.988601	0.757218	0.9137	0.673468	0.819557	0.761018	0.937088	0.901092	0.804932	0
CGCAACCGGGGTCCAAAAAG	+	chrII	66445	66467	P859L	NA	NA	-9.667	9.667	FALSE	neProvs	YBL085W	BOI1	Protein implicated in polar growth; functionally redundant with Boi2p; interacts with bud-emergence protein Bem1p; contains an SH3 (src homology 3) domain and a PH (pleckstrin homology) domain; relocalizes from bud neck to cytoplasm upon DNA replication stress; BOI1 has a paralog, BOI2, that arose from the whole genome duplication	0.198014	0.38311	0.111062	0.00317803	0.241583	0.134372	-0.277073	-0.165284	0.393879	0.117966	-0.0288121	0.836857	0.702625	0.988601	0.897848	0.862821	0.771209	0.855798	0.84844	0.631633	0.901092	0.950699	0
AAAAAGACCAAAGTTTCTAC	-	chrII	62554	62576	P12S	NA	NA	-7.725	7.725	FALSE	neProvs	YBL086C	YBL086C	Protein of unknown function; green fluorescent protein (GFP)-fusion protein localizes to the cell periphery	0.0227471	-0.353698	0.0626618	-0.0466456	-0.143309	0.223106	0.0561848	0.201981	-0.225991	-0.0692686	-0.19764	0.939576	0.797698	0.995762	0.882396	0.899374	0.722432	0.999238	0.846661	0.917861	0.901092	0.876579	0
ATGGCCAGCTCGCTAATTAC	-	chrII	61937	61959	Q217*	NA	NA	NA	NA	FALSE	neStops	YBL086C	YBL086C	Protein of unknown function; green fluorescent protein (GFP)-fusion protein localizes to the cell periphery	-0.108339	0.0625994	0.0115057	-0.0194723	0.0570238	-0.305585	0.0157524	-0.00663682	-0.0173968	-0.115491	0.0672507	0.909565	0.971991	0.9985	0.892952	0.899374	0.51661	0.999797	0.907462	0.961753	0.901092	0.936086	0
TTGCAGTTGAAGCTAGTTAG	-	chrII	61998	62020	Q196*	NA	NA	NA	NA	FALSE	neStops	YBL086C	YBL086C	Protein of unknown function; green fluorescent protein (GFP)-fusion protein localizes to the cell periphery	NA	0.130965	NA	0.0793388	-0.481407	-0.0396428	-0.5476	0.254633	0.104311	NA	-0.15458	NA	0.971991	NA	0.878479	0.882753	0.861242	0.855798	0.857328	0.957553	NA	0.921782	0
ACGCAGAAAGCTTTGATGAA	-	chrII	51986	52008	Q2460*	NA	NA	NA	NA	FALSE	neStops	YBL088C	TEL1	Protein kinase primarily involved in telomere length regulation; contributes to cell cycle checkpoint control in response to DNA damage; acts with Red1p and Mec1p to promote interhomolog recombination by phosphorylation of Hop1; functionally redundant with Mec1p; regulates P-body formation induced by replication stress; homolog of human ataxia-telangiectasia mutated (ATM) gene	-0.139339	0.0645568	0.0241124	0.292603	-0.452733	0.468986	0.866273	0.204238	-0.2957	-0.0320875	0.000179122	0.918539	0.973678	0.9985	0.781915	0.80734	0.386658	0.305356	0.857961	0.920129	0.903529	0.954677	0
ATTCCTGCCTTTGGTCCTAA	+	chrII	51839	51861	A2513T	G2514K	NA	c(-3.131, -7.996)	7.996	FALSE	neProvs	YBL088C	TEL1	Protein kinase primarily involved in telomere length regulation; contributes to cell cycle checkpoint control in response to DNA damage; acts with Red1p and Mec1p to promote interhomolog recombination by phosphorylation of Hop1; functionally redundant with Mec1p; regulates P-body formation induced by replication stress; homolog of human ataxia-telangiectasia mutated (ATM) gene	-0.00248233	0.0640027	0.00581024	0.0696033	0.19979	0.109666	-0.286504	0.233991	0.219972	0.322572	-0.177326	0.942515	0.971695	0.9985	0.859158	0.870543	0.774349	0.822933	0.808348	0.905978	0.843818	0.87395	0
GAATTGCAAGGATATGACAG	-	chrII	52316	52338	Q2351*	NA	NA	NA	NA	FALSE	neStops	YBL088C	TEL1	Protein kinase primarily involved in telomere length regulation; contributes to cell cycle checkpoint control in response to DNA damage; acts with Red1p and Mec1p to promote interhomolog recombination by phosphorylation of Hop1; functionally redundant with Mec1p; regulates P-body formation induced by replication stress; homolog of human ataxia-telangiectasia mutated (ATM) gene	-0.226588	-0.322536	-0.471068	0.182892	0.963951	-0.00218057	0.901524	-0.342455	NA	NA	NA	0.907801	0.936122	0.983555	0.85124	0.270781	0.873379	0.756777	0.845568	NA	NA	NA	0
GAGTCTTATAGGGCCCTTAA	-	chrII	51143	51165	S2741F	NA	NA	-5.197	5.197	FALSE	neProvs	YBL088C	TEL1	Protein kinase primarily involved in telomere length regulation; contributes to cell cycle checkpoint control in response to DNA damage; acts with Red1p and Mec1p to promote interhomolog recombination by phosphorylation of Hop1; functionally redundant with Mec1p; regulates P-body formation induced by replication stress; homolog of human ataxia-telangiectasia mutated (ATM) gene	0.0689397	-0.224712	0.137161	-0.04803	0.05944	0.216396	0.0767193	0.180441	0.274618	0.2052	0.0157785	0.921387	0.925329	0.988601	0.882396	0.899374	0.700875	0.990602	0.853676	0.90033	0.901092	0.952099	0
GTTCCATTAGGACCAAAGGC	-	chrII	51842	51864	P2508L	NA	NA	-9.994	9.994	FALSE	neProvs	YBL088C	TEL1	Protein kinase primarily involved in telomere length regulation; contributes to cell cycle checkpoint control in response to DNA damage; acts with Red1p and Mec1p to promote interhomolog recombination by phosphorylation of Hop1; functionally redundant with Mec1p; regulates P-body formation induced by replication stress; homolog of human ataxia-telangiectasia mutated (ATM) gene	-0.210943	NA	-0.55534	-0.384288	-0.238485	-0.347536	0.0941652	0.330729	0.195633	0.949858	0.0477482	0.907801	NA	0.954291	0.736437	0.898896	0.711453	0.997662	0.805455	0.943198	0.466812	0.951166	0
TCAAACCAATCCAACGGATC	+	chrII	51617	51639	W2587*	NA	NA	NA	NA	FALSE	neStops	YBL088C	TEL1	Protein kinase primarily involved in telomere length regulation; contributes to cell cycle checkpoint control in response to DNA damage; acts with Red1p and Mec1p to promote interhomolog recombination by phosphorylation of Hop1; functionally redundant with Mec1p; regulates P-body formation induced by replication stress; homolog of human ataxia-telangiectasia mutated (ATM) gene	NA	0.553176	0.364101	-0.346872	-0.313328	-0.53052	0.682277	0.367265	0.0465856	-0.2491	0.084988	NA	0.724064	0.986573	0.804806	0.884317	0.474704	0.633424	0.823092	0.959205	0.901092	0.936086	0
TCCACTACAAAAATTTACTT	-	chrII	57291	57313	Q693*	NA	NA	NA	NA	FALSE	neStops	YBL088C	TEL1	Protein kinase primarily involved in telomere length regulation; contributes to cell cycle checkpoint control in response to DNA damage; acts with Red1p and Mec1p to promote interhomolog recombination by phosphorylation of Hop1; functionally redundant with Mec1p; regulates P-body formation induced by replication stress; homolog of human ataxia-telangiectasia mutated (ATM) gene	-0.153112	0.335378	-0.559451	0.143566	-0.444742	-0.071758	-0.340487	0.189191	0.371743	-0.257338	0.32609	0.911485	0.905879	0.797954	0.83949	0.76954	0.84735	0.912288	0.863071	0.877685	0.901092	0.809075	0
ACTCCCGAACGTACGTTTGA	-	chrII	49577	49599	G8K	NA	NA	-6.579	6.579	FALSE	neProvs	YBL089W	AVT5	Putative transporter; member of a family of seven S. cerevisiae genes (AVT1-7) related to vesicular GABA-glycine transporters; AVT5 has a paralog, AVT6, that arose from the whole genome duplication	-0.117119	-0.0959286	0.157013	-0.346011	0.263339	-0.407915	-0.0355158	0.304258	0.0853345	0.322091	-0.144539	0.91629	0.966692	0.988601	0.612469	0.870532	0.485395	0.999238	0.8113	0.948104	0.885443	0.921782	0
CGCCTGCTCCACATGCTGTA	-	chrII	49612	49634	A19T	G20S	NA	c(-3.723, -5.984)	5.984	FALSE	neProvs	YBL089W	AVT5	Putative transporter; member of a family of seven S. cerevisiae genes (AVT1-7) related to vesicular GABA-glycine transporters; AVT5 has a paralog, AVT6, that arose from the whole genome duplication	0.124544	-0.0476266	0.00650349	-0.037463	0.14385	0.149701	0.0791238	-0.513724	0.0376519	-0.0229651	-0.00369241	0.890955	0.971991	0.9985	0.882396	0.897754	0.72752	0.986028	0.50478	0.958665	0.903529	0.953669	0
AGTCCATCCACGCACCTTCT	+	chrII	48406	48428	W72*	M73I	D74N	c(NA, -1.571, -2.791)	2.791	FALSE	neStops	YBL091C	MAP2	Methionine aminopeptidase; catalyzes the cotranslational removal of N-terminal methionine from nascent polypeptides; function is partially redundant with that of Map1p	-0.0282588	0.0750956	-0.0638653	0.104123	0.0473965	-0.0711504	-0.203459	-0.0922997	0.250681	0.256393	0.302464	0.933199	0.967033	0.995054	0.829076	0.899374	0.820056	0.901307	0.877351	0.824689	0.885443	0.528967	0
TCCGTTCCCATCGTCAAAAA	-	chrII	47751	47773	P288F	NA	NA	-11	11	FALSE	neProvs	YBL091C	MAP2	Methionine aminopeptidase; catalyzes the cotranslational removal of N-terminal methionine from nascent polypeptides; function is partially redundant with that of Map1p	-0.211931	-0.0677448	-0.0123171	-0.120096	0.0928013	-0.0626163	-0.192442	0.15294	-0.0944346	-0.0522305	-0.161187	0.808403	0.968218	0.9985	0.825063	0.899374	0.828495	0.938989	0.850244	0.942031	0.901092	0.850156	0
AGGCCCAATGTGGCCATCAT	-	chrII	46932	46954	P48F	NA	NA	-10.584	10.584	FALSE	neProvs	YBL091C-A	SCS22	Protein involved in regulation of phospholipid metabolism; one of 6 proteins (Ist2p, Scs2p, Scs22p, Tcb1p, Tcb2p, Tcb3p) that connect the ER and plasma membrane (PM); regulates PM PI4P levels by controlling access of the Sac1p phosphatase to its substrate, PI4P; human VAP homolog; similar to D. melanogaster inturned protein; SWAT-GFP and mCherry fusion proteins localize to the cytosol; SCS22 has …	0.0624303	0.0133077	0.0553236	0.0143592	-0.120469	-0.000600009	0.272472	-0.367102	-0.150769	0.0457237	-0.0675572	0.9186	0.980103	0.995762	0.892952	0.899374	0.873379	0.814465	0.689027	0.930302	0.901092	0.931889	0
CTCCCACAAAGTATTGTGTG	-	chrII	46952	46974	P41L	T42I	NA	c(-9.622, -2.04)	9.622	FALSE	neProvs	YBL091C-A	SCS22	Protein involved in regulation of phospholipid metabolism; one of 6 proteins (Ist2p, Scs2p, Scs22p, Tcb1p, Tcb2p, Tcb3p) that connect the ER and plasma membrane (PM); regulates PM PI4P levels by controlling access of the Sac1p phosphatase to its substrate, PI4P; human VAP homolog; similar to D. melanogaster inturned protein; SWAT-GFP and mCherry fusion proteins localize to the cytosol; SCS22 has …	-0.0435125	0.163232	-0.0761442	0.0661458	0.191546	-0.354632	0.275725	0.0204377	0.213756	0.592282	0.144312	0.93135	0.936122	0.995762	0.873144	0.892173	0.524358	0.856511	0.902804	0.911993	0.602494	0.898132	0
TTAGAACCGTAACCGATCTT	-	chrII	46134	46156	G58N	NA	NA	-5.882	5.882	TRUE	eProvs	YBL092W	RPL32	Ribosomal 60S subunit protein L32; overexpression disrupts telomeric silencing; homologous to mammalian ribosomal protein L32, no bacterial homolog	-0.712148	-0.403504	0.283055	-0.138733	-0.286456	-0.287749	-0.563617	0.374065	-0.748838	-0.632464	-0.985022	0.20141	0.799496	0.983555	0.849627	0.871897	0.668758	0.721465	0.786298	0.139725	0.602494	0.0053052	1
AGGTCCCAATCGAAATTTGG	+	chrII	44509	44531	W135*	D136N	NA	c(NA, -0.02)	0.02	FALSE	neStops	YBL093C	ROX3	Subunit of the RNA polymerase II mediator complex; associates with core polymerase subunits to form the RNA polymerase II holoenzyme	-0.190037	-0.0414264	0.199002	1.11296	-0.622692	-0.930216	0.213566	NA	1.11332	0.0463894	-0.302299	0.907803	0.978346	0.990002	0.0273387	0.710577	0.110544	0.970874	NA	0.0266806	0.903529	0.87395	2
ATGATACAACCACCTCAGCA	-	chrII	44596	44618	Q103*	NA	NA	NA	NA	FALSE	neStops	YBL093C	ROX3	Subunit of the RNA polymerase II mediator complex; associates with core polymerase subunits to form the RNA polymerase II holoenzyme	NA	NA	0.389282	NA	NA	-0.900511	NA	NA	NA	NA	NA	NA	NA	0.986305	NA	NA	0.290602	NA	NA	NA	NA	NA	0
GTAGGACAAGGCCTCTTGTT	+	chrII	43592	43614	Q108*	NA	NA	NA	NA	FALSE	neStops	YBL095W	MRX3	Protein that associates with mitochondrial ribosome; likely functions in cristae junction formation; the authentic, non-tagged protein is detected in highly purified mitochondria in high-throughput studies	NA	-0.0266086	0.264405	0.693192	0.216441	-0.313861	-0.589179	0.150233	-0.0762412	-0.325801	-0.0132683	NA	0.980103	0.988601	0.433227	0.899374	0.688551	0.855798	0.882769	0.958794	0.901092	0.9526	0
AAACAGGTAAGTTATTGAGC	+	chrII	41117	41139	T97I	NA	NA	-6	6	TRUE	eProvs	YBL097W	BRN1	Subunit of the condensin complex; required for chromosome condensation and for clustering of tRNA genes at the nucleolus; may influence multiple aspects of chromosome transmission	-0.214412	0.00506489	-0.146073	-0.167603	0.0264875	0.20885	0.0654547	-0.291756	-0.111597	0.0718827	0.0114863	0.854459	0.980348	0.990002	0.836522	0.9137	0.739569	0.999238	0.831107	0.947566	0.901092	0.9526	0
AAAGCATCTGCAACCTTGGA	+	chrII	41050	41072	A75V	S76F	NA	c(-4, -6)	6	TRUE	eProvs	YBL097W	BRN1	Subunit of the condensin complex; required for chromosome condensation and for clustering of tRNA genes at the nucleolus; may influence multiple aspects of chromosome transmission	NA	NA	NA	NA	0.25423	NA	NA	NA	NA	NA	NA	NA	NA	NA	NA	0.899374	NA	NA	NA	NA	NA	NA	0
AAGCATCTGCAACCTTGGAT	+	chrII	41051	41073	A75V	S76F	NA	c(-4, -6)	6	TRUE	eProvs	YBL097W	BRN1	Subunit of the condensin complex; required for chromosome condensation and for clustering of tRNA genes at the nucleolus; may influence multiple aspects of chromosome transmission	-0.343226	0.0176309	-0.475374	-0.205265	-0.094905	NA	-0.0340299	NA	NA	NA	-0.696796	0.877896	0.980348	0.983555	0.835383	0.9137	NA	0.999797	NA	NA	NA	0.611633	0
GTACACTCAAACAAGACATA	+	chrII	40206	40228	T356I	Q357*	NA	c(-4.288, NA)	4.288	FALSE	neStops	YBL098W	BNA4	Kynurenine 3-monooxygenase; required for the de novo biosynthesis of NAD from tryptophan via kynurenine; expression regulated by Hst1p; putative therapeutic target for Huntington disease	0.13187	0.451523	-0.283441	-0.664594	0.0901609	0.524502	0.079729	0.0755507	-0.00159758	0.0430807	-0.217212	0.918585	0.871365	0.988598	0.514775	0.899374	0.456776	0.996942	0.894971	0.963142	0.903529	0.898132	0
AGCCATACCTTTAACACCAG	-	chrII	37330	37352	G98D	M99I	NA	c(-6.102, -3.578)	6.102	FALSE	neProvs	YBL099W	ATP1	Alpha subunit of the F1 sector of mitochondrial F1F0 ATP synthase; which is a large, evolutionarily conserved enzyme complex required for ATP synthesis; F1 translationally regulates ATP6 and ATP8 expression to achieve a balanced output of ATP synthase genes encoded in nucleus and mitochondria; phosphorylated; N-terminally propionylated in vivo	-0.0442762	0.27153	0.111731	0.232501	0.00513428	0.23779	-0.037024	-0.179654	0.0319711	-0.39752	0.312964	0.93228	0.850608	0.990002	0.686274	0.922637	0.646356	0.999238	0.835354	0.959205	0.722021	0.637328	0
GGTAACCCTATTGATGGTAA	+	chrII	37497	37519	P151F	NA	NA	-8.156	8.156	FALSE	neProvs	YBL099W	ATP1	Alpha subunit of the F1 sector of mitochondrial F1F0 ATP synthase; which is a large, evolutionarily conserved enzyme complex required for ATP synthesis; F1 translationally regulates ATP6 and ATP8 expression to achieve a balanced output of ATP synthase genes encoded in nucleus and mitochondria; phosphorylated; N-terminally propionylated in vivo	0.0259033	-0.140959	0.149419	0.0164358	-0.0110102	0.279407	0.114713	0.171204	0.0108348	0.178735	0.0342251	0.937037	0.936122	0.988598	0.892952	0.917025	0.599044	0.970385	0.84844	0.961765	0.901092	0.945512	0
TTAACACCGGCATAAATCAA	-	chrII	38490	38512	G485N	V486I	NA	c(-5.045, -0.743)	5.045	FALSE	neProvs	YBL099W	ATP1	Alpha subunit of the F1 sector of mitochondrial F1F0 ATP synthase; which is a large, evolutionarily conserved enzyme complex required for ATP synthesis; F1 translationally regulates ATP6 and ATP8 expression to achieve a balanced output of ATP synthase genes encoded in nucleus and mitochondria; phosphorylated; N-terminally propionylated in vivo	-0.317659	0.112292	-0.0772436	0.104413	-0.0370611	-0.107296	0.139755	-0.0387946	-0.186307	-0.273663	0.0564968	0.605031	0.951573	0.990157	0.834241	0.910336	0.793511	0.96251	0.89452	0.924709	0.885443	0.937326	0
TTGCCTGTTATTGAAACCCA	+	chrII	38133	38155	P362F	NA	NA	-10.29	10.29	FALSE	neProvs	YBL099W	ATP1	Alpha subunit of the F1 sector of mitochondrial F1F0 ATP synthase; which is a large, evolutionarily conserved enzyme complex required for ATP synthesis; F1 translationally regulates ATP6 and ATP8 expression to achieve a balanced output of ATP synthase genes encoded in nucleus and mitochondria; phosphorylated; N-terminally propionylated in vivo	0.0955193	0.216546	0.0258493	0.146774	-0.148874	0.271132	0.145289	-0.181044	0.073032	0.323632	-0.127251	0.902273	0.873207	0.996807	0.7914	0.875124	0.401475	0.94384	0.819109	0.944549	0.751287	0.87395	0
TTCTCCCATTGTCTCACCGA	-	chrII	25497	25519	P929F	NA	NA	-9.492	9.492	FALSE	neProvs	YBL101C	ECM21	Protein involved in regulating endocytosis of plasma membrane proteins; identified as a substrate for ubiquitination by Rsp5p and deubiquitination by Ubp2p; promoter contains several Gcn4p binding elements; ECM21 has a paralog, CSR2, that arose from the whole genome duplication	-0.174682	0.00704222	0.148474	-0.106973	0.131787	-0.0916903	-0.244387	0.113025	0.0937077	0.0653044	0.0088163	0.850929	0.980348	0.986573	0.825063	0.898896	0.792478	0.846467	0.862887	0.937088	0.901092	0.952099	0
AACAAGACAGCAGAACTCGC	+	chrII	24163	24185	Q25*	NA	NA	NA	NA	FALSE	neStops	YBL102W	SFT2	Tetra-spanning membrane protein found mostly in the late Golgi; non-essential; can suppress some sed5 alleles; may be part of the transport machinery, but precise function is unknown; similar to mammalian syntaxin 5	0.278151	-0.100545	-0.103564	-0.0486102	-0.0113219	0.0362328	0.079006	0.270185	0.159849	-0.0219224	-0.0171418	0.808403	0.968562	0.990002	0.882396	0.916601	0.85682	0.993036	0.817971	0.932697	0.903529	0.95205	0
GACGTTGCCTGTATCTAGAC	+	chrII	24262	24284	P58S	NA	NA	-7.917	7.917	FALSE	neProvs	YBL102W	SFT2	Tetra-spanning membrane protein found mostly in the late Golgi; non-essential; can suppress some sed5 alleles; may be part of the transport machinery, but precise function is unknown; similar to mammalian syntaxin 5	0.22144	0.179107	0.311015	0.0790815	-0.00971142	-0.188897	-0.23119	-0.220682	0.0473886	0.0664809	0.0330965	0.825229	0.925329	0.950001	0.862586	0.917419	0.693457	0.895996	0.819109	0.959205	0.901092	0.946872	0
GAACCAGACAAAAGTCCTCC	-	chrII	23458	23480	Q21*	NA	NA	NA	NA	FALSE	neStops	YBL103C	RTG3	bHLH/Zip transcription factor for retrograde (RTG) and TOR pathways; forms a complex with another bHLH/Zip protein, Rtg1p, to activate the pathways; target of Hog1p	-0.051317	0.2556	-0.0831946	-0.383785	0.129301	-0.0604176	0.179475	0.142678	-0.258224	-0.0900076	0.0262846	0.931818	0.886811	0.990002	0.494339	0.899374	0.845907	0.941831	0.866393	0.905978	0.901092	0.95091	0
GACTATTCAGAATCAGAAAT	-	chrII	21097	21119	S61L	NA	NA	-5.383	5.383	FALSE	neProvs	YBL104C	SEA4	Subunit of SEACAT, a subcomplex of the SEA complex; Sea4p, along with Rtc1p and Mtc5p, redundantly inhibit the TORC1 inhibitory role of the Iml1p/SEACIT (Iml1p-Npr2p-Npr3p) subcomplex, a GAP for GTPase Gtr1p (EGOC subunit) in response to amino acid limitation, thereby resulting in activation of TORC1 signaling; SEA is a coatomer-related complex that associates dynamically with the vacuole; contai…	0.139121	0.228071	-0.377731	0.131717	0.066803	-0.00225287	-0.294782	0.994687	-0.11803	0.520502	0.159109	0.918539	0.936122	0.927851	0.851622	0.899374	0.873379	0.938944	0.199828	0.949708	0.857323	0.901627	0
GATACCATTAGGTGTTATTC	+	chrII	18903	18925	G796N	NA	NA	-6	6	FALSE	neProvs	YBL104C	SEA4	Subunit of SEACAT, a subcomplex of the SEA complex; Sea4p, along with Rtc1p and Mtc5p, redundantly inhibit the TORC1 inhibitory role of the Iml1p/SEACIT (Iml1p-Npr2p-Npr3p) subcomplex, a GAP for GTPase Gtr1p (EGOC subunit) in response to amino acid limitation, thereby resulting in activation of TORC1 signaling; SEA is a coatomer-related complex that associates dynamically with the vacuole; contai…	-0.0498293	0.137646	-0.50588	0.21653	0.37976	-0.286325	-0.2642	0.158456	0.30643	0.0600952	0.426877	0.933108	0.968562	0.888725	0.817915	0.764414	0.646499	0.941831	0.875836	0.906685	0.903529	0.766997	0
GCTCAGGCGGAAAATATAGT	-	chrII	20929	20951	Q116*	A117V	NA	c(NA, -0.225)	0.225	FALSE	neStops	YBL104C	SEA4	Subunit of SEACAT, a subcomplex of the SEA complex; Sea4p, along with Rtc1p and Mtc5p, redundantly inhibit the TORC1 inhibitory role of the Iml1p/SEACIT (Iml1p-Npr2p-Npr3p) subcomplex, a GAP for GTPase Gtr1p (EGOC subunit) in response to amino acid limitation, thereby resulting in activation of TORC1 signaling; SEA is a coatomer-related complex that associates dynamically with the vacuole; contai…	-0.257299	0.0279725	-0.169597	0.237907	-0.242984	-0.464637	0.219229	0.124899	0.0991949	0.24152	0.501433	0.877896	0.980103	0.990002	0.801822	0.898896	0.546656	0.973255	0.890397	0.954339	0.901092	0.563984	0
TTGTGCAATAACTAAACATT	+	chrII	20696	20718	C198Y	NA	NA	-5.733	5.733	FALSE	neProvs	YBL104C	SEA4	Subunit of SEACAT, a subcomplex of the SEA complex; Sea4p, along with Rtc1p and Mtc5p, redundantly inhibit the TORC1 inhibitory role of the Iml1p/SEACIT (Iml1p-Npr2p-Npr3p) subcomplex, a GAP for GTPase Gtr1p (EGOC subunit) in response to amino acid limitation, thereby resulting in activation of TORC1 signaling; SEA is a coatomer-related complex that associates dynamically with the vacuole; contai…	-0.040579	0.174971	0.113159	0.194528	0.140601	0.0994185	-0.335816	0.387034	0.0700531	-0.0254994	-0.242804	0.93135	0.907928	0.990002	0.727401	0.898896	0.801175	0.758185	0.667091	0.951669	0.903529	0.77701	0
AAAAGATCCTGAAAAGAGGT	-	chrII	14495	14517	P1063S	NA	NA	-7.631	7.631	TRUE	eProvs	YBL105C	PKC1	Protein serine/threonine kinase; essential for cell wall remodeling during growth; localized to sites of polarized growth and the mother-daughter bud neck; homolog of the alpha, beta, and gamma isoforms of mammalian protein kinase C (PKC)	-0.0133881	0.107049	0.0651969	-0.101446	-0.209274	0.477454	0.127199	0.176069	0.124358	-0.129826	-0.142164	0.940933	0.9701	0.995762	0.844026	0.887548	0.359191	0.983717	0.861388	0.943198	0.901092	0.921782	0
AAAGATCCTGAAAAGAGGTT	-	chrII	14494	14516	P1063F	NA	NA	-10.618	10.618	TRUE	eProvs	YBL105C	PKC1	Protein serine/threonine kinase; essential for cell wall remodeling during growth; localized to sites of polarized growth and the mother-daughter bud neck; homolog of the alpha, beta, and gamma isoforms of mammalian protein kinase C (PKC)	0.0689754	-0.30804	-0.34396	-0.053137	-0.0853668	-0.241551	-0.0145987	-0.170742	-0.0606741	-0.0956322	-0.0254207	0.927388	0.886811	0.983555	0.882396	0.899374	0.740859	0.999797	0.86675	0.958794	0.901092	0.952019	0
AATACACTTAGTAACAACAT	+	chrII	16311	16333	C461Y	NA	NA	-10.988	10.988	TRUE	eProvs	YBL105C	PKC1	Protein serine/threonine kinase; essential for cell wall remodeling during growth; localized to sites of polarized growth and the mother-daughter bud neck; homolog of the alpha, beta, and gamma isoforms of mammalian protein kinase C (PKC)	-0.165734	-0.667304	-0.157131	-0.734684	0.00317396	0.219545	0.0141383	0.208572	-0.191497	-0.694587	-0.260526	0.887075	0.216477	0.988601	0.124897	0.923352	0.682711	0.999797	0.846141	0.930165	0.391419	0.828775	0
AATATACCGTGATTTGAAGT	-	chrII	14840	14862	R948C	NA	NA	-7.991	7.991	TRUE	eProvs	YBL105C	PKC1	Protein serine/threonine kinase; essential for cell wall remodeling during growth; localized to sites of polarized growth and the mother-daughter bud neck; homolog of the alpha, beta, and gamma isoforms of mammalian protein kinase C (PKC)	-0.536611	-0.605498	-0.723066	-1.42411	-0.941154	-1.11585	-0.93644	-0.325602	-1.07622	-1.21044	-0.877716	0.584372	0.467362	0.767411	0.000452481	0.0168253	9.41737e-05	0.0931045	0.8113	0.00828794	0.0722158	0.258056	4
CATCCCAGAAATTAAATCTC	-	chrII	14375	14397	P1102L	NA	NA	-9.956	9.956	TRUE	eProvs	YBL105C	PKC1	Protein serine/threonine kinase; essential for cell wall remodeling during growth; localized to sites of polarized growth and the mother-daughter bud neck; homolog of the alpha, beta, and gamma isoforms of mammalian protein kinase C (PKC)	-0.0558186	0.117038	-0.044555	0.0380079	0.069029	-0.123514	0.0268554	-0.136678	-0.143303	-0.252757	0.200864	0.92688	0.957581	0.995762	0.886564	0.899374	0.806105	0.999797	0.866393	0.937088	0.901092	0.850156	0
CATCTCCTGAGAATGGAGAT	+	chrII	14615	14637	G1026K	D1027N	NA	c(-7.965, -4.538)	7.965	TRUE	eProvs	YBL105C	PKC1	Protein serine/threonine kinase; essential for cell wall remodeling during growth; localized to sites of polarized growth and the mother-daughter bud neck; homolog of the alpha, beta, and gamma isoforms of mammalian protein kinase C (PKC)	-0.101185	-0.396152	-0.276209	-0.163543	-0.144245	0.372443	-0.550699	0.0147909	-0.24702	0.0802239	-0.351797	0.915831	0.740449	0.983555	0.81142	0.899374	0.475701	0.56821	0.904705	0.91087	0.901092	0.771454	0
CTGACTGGCGTTCTAACAAT	-	chrII	17056	17078	T208I	NA	NA	-5.019	5.019	TRUE	eProvs	YBL105C	PKC1	Protein serine/threonine kinase; essential for cell wall remodeling during growth; localized to sites of polarized growth and the mother-daughter bud neck; homolog of the alpha, beta, and gamma isoforms of mammalian protein kinase C (PKC)	0.167576	0.457899	-0.0357963	-0.165781	0.0325506	0.175106	0.385727	-0.00575693	-0.181329	0.0273472	0.0732959	0.877896	0.298691	0.995866	0.774894	0.9137	0.665688	0.705543	0.907462	0.921143	0.903529	0.929629	0
TACAATCACCGATGTTTGCC	-	chrII	17004	17026	S226L	NA	NA	-5.727	5.727	TRUE	eProvs	YBL105C	PKC1	Protein serine/threonine kinase; essential for cell wall remodeling during growth; localized to sites of polarized growth and the mother-daughter bud neck; homolog of the alpha, beta, and gamma isoforms of mammalian protein kinase C (PKC)	-0.013785	-0.035783	-0.408598	0.453061	-0.357295	0.273413	-0.226045	-0.230859	-0.172063	0.257151	-0.129072	0.941387	0.979575	0.903732	0.440807	0.804959	0.659962	0.920019	0.835354	0.928291	0.901092	0.912546	0
TCATTCCAGTGGCTATAATG	-	chrII	16827	16849	P285L	NA	NA	-9.989	9.989	TRUE	eProvs	YBL105C	PKC1	Protein serine/threonine kinase; essential for cell wall remodeling during growth; localized to sites of polarized growth and the mother-daughter bud neck; homolog of the alpha, beta, and gamma isoforms of mammalian protein kinase C (PKC)	-0.268748	-0.589041	0.265852	-0.0747129	-0.00196566	0.327613	-0.0800093	-0.058085	0.369637	-0.190671	0.351866	0.850929	0.47654	0.983555	0.864195	0.923365	0.669046	0.995843	0.892371	0.84946	0.901092	0.771454	0
AAGTATCCAATTGCCACTAG	-	chrII	11565	11587	P767L	NA	NA	-6.956	6.956	FALSE	neProvs	YBL106C	SRO77	Protein with roles in exocytosis and cation homeostasis; functions in docking and fusion of post-Golgi vesicles with plasma membrane; regulates cell proliferation and colony development via the Rho1-Tor1 pathway; interacts with SNARE protein Sec9p; homolog of Drosophila lethal giant larvae tumor suppressor; SRO77 has a paralog, SRO7, that arose from the whole genome duplication	-0.0384566	0.348274	0.471803	0.215708	-0.158511	0.451751	-0.00187886	0.0967009	0.0199595	0.00398836	0.129019	0.932184	0.681011	0.614618	0.700072	0.897754	0.146293	0.999797	0.878173	0.960022	0.914198	0.898132	0
ACCAGATCTGCTTTACTAAC	-	chrII	12444	12466	S474F	NA	NA	-5.333	5.333	FALSE	neProvs	YBL106C	SRO77	Protein with roles in exocytosis and cation homeostasis; functions in docking and fusion of post-Golgi vesicles with plasma membrane; regulates cell proliferation and colony development via the Rho1-Tor1 pathway; interacts with SNARE protein Sec9p; homolog of Drosophila lethal giant larvae tumor suppressor; SRO77 has a paralog, SRO7, that arose from the whole genome duplication	-0.00411437	-0.146753	0.139731	0.431786	-0.0689409	0.010214	0.00741688	0.790195	-0.279804	0.583705	0.157859	0.942278	0.956706	0.990002	0.551064	0.899374	0.866956	0.999797	0.401381	0.900347	0.686696	0.898582	0
AGTTCAAAAAAATCTTTGGC	-	chrII	12544	12566	Q440*	NA	NA	NA	NA	FALSE	neStops	YBL106C	SRO77	Protein with roles in exocytosis and cation homeostasis; functions in docking and fusion of post-Golgi vesicles with plasma membrane; regulates cell proliferation and colony development via the Rho1-Tor1 pathway; interacts with SNARE protein Sec9p; homolog of Drosophila lethal giant larvae tumor suppressor; SRO77 has a paralog, SRO7, that arose from the whole genome duplication	NA	NA	NA	-0.695137	NA	-0.136407	-0.0801776	0.580086	-0.160336	NA	-0.188609	NA	NA	NA	0.534793	NA	0.831397	0.999238	0.819109	0.948766	NA	0.921782	0
CACCGGTTATTTCTATCCAA	-	chrII	13325	13347	P179L	NA	NA	-7.905	7.905	FALSE	neProvs	YBL106C	SRO77	Protein with roles in exocytosis and cation homeostasis; functions in docking and fusion of post-Golgi vesicles with plasma membrane; regulates cell proliferation and colony development via the Rho1-Tor1 pathway; interacts with SNARE protein Sec9p; homolog of Drosophila lethal giant larvae tumor suppressor; SRO77 has a paralog, SRO7, that arose from the whole genome duplication	-0.150715	0.193407	0.101424	0.326436	-0.155892	0.313311	-0.0663969	-0.296388	-0.181725	-0.0286497	0.0516561	0.907801	0.936122	0.99082	0.694324	0.899374	0.625416	0.999238	0.804604	0.933136	0.903529	0.942021	0
GGTTCCTTCAATGAAACCAA	+	chrII	12017	12039	G620K	NA	NA	-7.733	7.733	FALSE	neProvs	YBL106C	SRO77	Protein with roles in exocytosis and cation homeostasis; functions in docking and fusion of post-Golgi vesicles with plasma membrane; regulates cell proliferation and colony development via the Rho1-Tor1 pathway; interacts with SNARE protein Sec9p; homolog of Drosophila lethal giant larvae tumor suppressor; SRO77 has a paralog, SRO7, that arose from the whole genome duplication	-0.0699904	-0.0992356	0.107593	0.0866324	-0.123978	-0.0637717	-0.292895	0.515999	-0.113555	0.140688	0.205405	0.922531	0.967674	0.990002	0.864313	0.899374	0.83647	0.912036	0.617111	0.944549	0.901092	0.87395	0
GTTCAAAAAAATCTTTGGCT	-	chrII	12543	12565	Q440*	NA	NA	NA	NA	FALSE	neStops	YBL106C	SRO77	Protein with roles in exocytosis and cation homeostasis; functions in docking and fusion of post-Golgi vesicles with plasma membrane; regulates cell proliferation and colony development via the Rho1-Tor1 pathway; interacts with SNARE protein Sec9p; homolog of Drosophila lethal giant larvae tumor suppressor; SRO77 has a paralog, SRO7, that arose from the whole genome duplication	0.087812	-0.0919336	-0.0625117	-0.0614054	-0.0179278	-0.200954	0.433861	0.672209	0.205004	-0.41694	0.0131483	0.926984	0.971991	0.995866	0.882396	0.915897	0.78224	0.855798	0.605275	0.930302	0.882132	0.9526	0
GAAACAGGAAGCTCAATATA	-	chrII	10110	10132	Q142*	NA	NA	NA	NA	FALSE	neStops	YBL107C	MIX23	Mitochondrial intermembrane space protein of unknown function; imported via the MIA import machinery; contains an unusual twin cysteine motif (CX13C CX14C)	0.167927	0.172463	0.046315	0.033272	-0.175267	0.133207	-0.329907	0.229119	0.200936	-0.0246843	0.23575	0.907801	0.936122	0.995866	0.892952	0.899374	0.806539	0.905916	0.855324	0.932346	0.903529	0.87395	0
AACCTTTCCAGGCTAATATT	+	chrII	239276	239298	W667*	G669S	NA	c(NA, -5.95)	5.95	FALSE	neStops	YBR001C	NTH2	Putative neutral trehalase, required for thermotolerance; may mediate resistance to other cellular stresses; NTH2 has a paralog, NTH1, that arose from the whole genome duplication	-0.393395	-0.0933781	-0.120421	0.289259	-0.240224	0.0515143	-0.014318	0.0178759	0.00245121	-0.710148	0.598666	0.801369	0.971991	0.990002	0.716805	0.897754	0.858639	0.999797	0.905146	0.963142	0.602494	0.433367	0
CAAATTACCATAGAAGACAC	-	chrII	240817	240839	T151I	NA	NA	-5.893	5.893	FALSE	neProvs	YBR001C	NTH2	Putative neutral trehalase, required for thermotolerance; may mediate resistance to other cellular stresses; NTH2 has a paralog, NTH1, that arose from the whole genome duplication	-0.0236202	0.0643362	0.00842177	0.0150557	0.0473668	0.0183336	-0.297106	0.106366	0.0688001	0.121328	-0.0831255	0.934906	0.971606	0.9985	0.892952	0.899374	0.863178	0.806073	0.872532	0.949225	0.901092	0.922513	0
CGTCCCGACTTTAATAACTT	+	chrII	240792	240814	G163K	NA	NA	-7.857	7.857	FALSE	neProvs	YBR001C	NTH2	Putative neutral trehalase, required for thermotolerance; may mediate resistance to other cellular stresses; NTH2 has a paralog, NTH1, that arose from the whole genome duplication	0.22995	-0.228305	0.0756506	-0.106253	-0.0738929	0.0325838	0.0807798	-0.611369	-0.316267	0.124252	0.0278695	0.817171	0.873207	0.990002	0.826865	0.899374	0.854175	0.989323	0.214037	0.694937	0.901092	0.947626	0
GTCATGTCCTGACTCTCTCA	+	chrII	239763	239785	G505E	NA	NA	-8	8	FALSE	neProvs	YBR001C	NTH2	Putative neutral trehalase, required for thermotolerance; may mediate resistance to other cellular stresses; NTH2 has a paralog, NTH1, that arose from the whole genome duplication	-0.00323449	0.0737155	0.141728	0.0810573	0.153416	-0.0320375	-0.0385423	-0.0428466	-0.20398	0.0802502	0.0178526	0.942127	0.9567	0.983555	0.834241	0.871897	0.84735	0.996942	0.890497	0.84946	0.901092	0.950642	0
GTCCCGACTTTAATAACTTT	+	chrII	240793	240815	V162I	G163K	NA	c(0.078, -7.857)	7.857	FALSE	neProvs	YBR001C	NTH2	Putative neutral trehalase, required for thermotolerance; may mediate resistance to other cellular stresses; NTH2 has a paralog, NTH1, that arose from the whole genome duplication	0.0143748	-0.0977506	0.00806656	0.188698	-0.186171	-0.174412	-0.223698	0.152883	-0.326687	-0.052632	0.0626717	0.940823	0.968218	0.9985	0.769123	0.897754	0.742086	0.912288	0.859931	0.805833	0.903529	0.936086	0
TATCCTTATGCGGTACCTGG	-	chrII	240295	240317	P324F	NA	NA	-11	11	FALSE	neProvs	YBR001C	NTH2	Putative neutral trehalase, required for thermotolerance; may mediate resistance to other cellular stresses; NTH2 has a paralog, NTH1, that arose from the whole genome duplication	0.117708	-0.0396701	0.100212	-0.0346023	-0.0903886	0.0788887	0.179148	-0.206931	0.142884	-0.0510265	0.194236	0.902273	0.975825	0.990002	0.882585	0.899374	0.818961	0.9306	0.832371	0.930302	0.901092	0.850156	0
TTAATCCATCTACTGGTGAA	-	chrII	240330	240352	P313L	NA	NA	-7.896	7.896	FALSE	neProvs	YBR001C	NTH2	Putative neutral trehalase, required for thermotolerance; may mediate resistance to other cellular stresses; NTH2 has a paralog, NTH1, that arose from the whole genome duplication	-0.214968	0.259464	-0.00591794	0.0527911	0.0903826	0.108039	0.0590736	-0.197033	0.178565	-0.0822628	0.144727	0.850929	0.87638	0.9985	0.874735	0.899374	0.80615	0.996942	0.846141	0.925007	0.901092	0.898132	0
TTTGGGCCCAGTGTCTTCTA	+	chrII	240810	240832	G156E	NA	NA	-7.857	7.857	FALSE	neProvs	YBR001C	NTH2	Putative neutral trehalase, required for thermotolerance; may mediate resistance to other cellular stresses; NTH2 has a paralog, NTH1, that arose from the whole genome duplication	NA	NA	0.428498	0.0636617	NA	0.345206	NA	NA	NA	NA	NA	NA	NA	0.983555	0.886365	NA	0.761773	NA	NA	NA	NA	NA	0
AACTACAAAGAACAACAAAA	-	chrII	242109	242131	T148I	NA	NA	-6	6	TRUE	eProvs	YBR002C	RER2	Forms the dehydrodolichyl diphosphate syntase (DDS) complex with NUS1; major enzyme of polyprenol synthesis in both the endoplasmic reticulum (ER) and in lipid droplets; participates in ER protein sorting; human ortholog DHDDS functionally complements the heat sensitive growth defect of a ts allele, and is associated with retinitis pigmentosa	-0.205592	-0.174539	0.135392	-0.0193938	0.513438	0.103714	0.502842	0.10663	0.460735	0.0174421	-0.0755817	0.877896	0.936122	0.990002	0.892952	0.474376	0.805716	0.76904	0.88281	0.833607	0.903529	0.936086	0
CTGCTTTCCATATACAGGCA	-	chrII	242073	242095	P161S	NA	NA	-7.667	7.667	TRUE	eProvs	YBR002C	RER2	Forms the dehydrodolichyl diphosphate syntase (DDS) complex with NUS1; major enzyme of polyprenol synthesis in both the endoplasmic reticulum (ER) and in lipid droplets; participates in ER protein sorting; human ortholog DHDDS functionally complements the heat sensitive growth defect of a ts allele, and is associated with retinitis pigmentosa	-0.119605	-0.339575	-0.436488	-0.287028	-0.145439	0.13837	0.127445	0.25941	-0.112297	-0.00212493	0.467185	0.909144	0.741118	0.652846	0.617354	0.899374	0.740859	0.972614	0.804604	0.937088	0.916261	0.351341	0
GGCCAGAGTTTGGACCTATA	-	chrII	241840	241862	P237L	NA	NA	-10	10	TRUE	eProvs	YBR002C	RER2	Forms the dehydrodolichyl diphosphate syntase (DDS) complex with NUS1; major enzyme of polyprenol synthesis in both the endoplasmic reticulum (ER) and in lipid droplets; participates in ER protein sorting; human ortholog DHDDS functionally complements the heat sensitive growth defect of a ts allele, and is associated with retinitis pigmentosa	-0.251941	0.869183	-0.0548394	0.850345	0.0695594	-0.0424145	0.127172	-0.0152708	0.465174	-0.0219805	-0.160917	0.852797	0.51067	0.995866	0.358974	0.899374	0.861242	0.983717	0.905501	0.832545	0.903529	0.921782	0
TCCCCACTACATATTCTTCA	+	chrII	243223	243245	P140L	NA	NA	-9.925	9.925	FALSE	neProvs	YBR003W	COQ1	Hexaprenyl pyrophosphate synthetase; catalyzes the first step in ubiquinone (coenzyme Q) biosynthesis	-0.190822	-0.142878	0.0855709	-0.0361339	-0.128482	-0.279561	-0.00100437	-0.0419275	0.0394298	-0.273365	-0.122203	0.826626	0.936122	0.990002	0.882396	0.898896	0.506456	0.999917	0.89259	0.958496	0.874905	0.905621	0
TCTTTCCATGCAAACAAGAC	-	chrII	243982	244004	W397*	NA	NA	NA	NA	FALSE	neStops	YBR003W	COQ1	Hexaprenyl pyrophosphate synthetase; catalyzes the first step in ubiquinone (coenzyme Q) biosynthesis	NA	-0.378256	-0.377455	NA	NA	-0.153176	0.591887	0.0924363	-0.460683	-0.543984	NA	NA	0.907928	0.983555	NA	NA	0.823898	0.855798	0.887137	0.856584	0.874905	NA	0
AAAGCAAGCCATGCTGATAA	+	chrII	245026	245048	C213Y	NA	NA	-7.117	7.117	TRUE	eProvs	YBR004C	GPI18	Functional ortholog of human PIG-V; PIG-V is a mannosyltransferase that transfers the second mannose in glycosylphosphatidylinositol biosynthesis; the authentic, non-tagged protein was localized to mitochondria	-0.0693131	0.455615	0.307388	-0.304625	0.227323	-0.107178	-0.293494	-0.264679	-0.0856677	-0.11097	0.197945	0.927181	0.702625	0.983555	0.712018	0.887002	0.825546	0.913418	0.824439	0.951416	0.901092	0.898132	0
AACACAGTTTGAACGATTCA	+	chrII	244993	245015	C224Y	NA	NA	-9.733	9.733	TRUE	eProvs	YBR004C	GPI18	Functional ortholog of human PIG-V; PIG-V is a mannosyltransferase that transfers the second mannose in glycosylphosphatidylinositol biosynthesis; the authentic, non-tagged protein was localized to mitochondria	0.350916	0.116921	-0.0520168	0.133109	0.0331985	0.108744	0.113033	0.547872	-0.101377	0.279106	-0.147177	0.806576	0.960476	0.997312	0.842356	0.9137	0.830994	0.996942	0.672706	0.949708	0.901092	0.922243	0
TTTGTCCTCAAAGGGGTGAA	-	chrII	244825	244847	P276F	NA	NA	-9.233	9.233	TRUE	eProvs	YBR004C	GPI18	Functional ortholog of human PIG-V; PIG-V is a mannosyltransferase that transfers the second mannose in glycosylphosphatidylinositol biosynthesis; the authentic, non-tagged protein was localized to mitochondria	0.306568	0.447601	-0.436638	0.234863	0.362464	0.166089	0.408755	0.347102	0.0677893	-0.13849	0.34322	0.788455	0.680739	0.81837	0.68125	0.735552	0.765223	0.819557	0.800181	0.955023	0.901092	0.683954	0
CAACCATGCCGTACCTCTAA	-	chrII	246123	246145	W79*	NA	NA	NA	NA	FALSE	neStops	YBR005W	RCR1	Protein of the ER membrane involved in cell wall chitin deposition; may function in the endosomal-vacuolar trafficking pathway, helping determine whether plasma membrane proteins are degraded or routed to the plasma membrane; RCR1 has a paralog, RCR2, that arose from the whole genome duplication	0.0438003	-0.133915	-0.18382	0.256459	0.168277	0.357453	-0.0931836	0.175372	0.353395	0.125738	-0.173597	0.928897	0.9567	0.986305	0.669635	0.891921	0.447352	0.986028	0.849158	0.809073	0.901092	0.850156	0
GAGCAATTGGAAAGGCTTCC	+	chrII	246464	246486	Q188*	NA	NA	NA	NA	FALSE	neStops	YBR005W	RCR1	Protein of the ER membrane involved in cell wall chitin deposition; may function in the endosomal-vacuolar trafficking pathway, helping determine whether plasma membrane proteins are degraded or routed to the plasma membrane; RCR1 has a paralog, RCR2, that arose from the whole genome duplication	-0.0492537	-0.0999249	0.751562	-0.409985	-0.0696505	NA	0.471994	NA	0.251353	0.0742831	-0.79519	0.933108	0.971991	0.916348	0.723162	0.900105	NA	0.905916	NA	0.926286	0.903529	0.415007	0
GCGTGCTCCCATTAGAGGTA	+	chrII	246115	246137	A72V	P73S	NA	c(-2.824, -7.681)	7.681	FALSE	neProvs	YBR005W	RCR1	Protein of the ER membrane involved in cell wall chitin deposition; may function in the endosomal-vacuolar trafficking pathway, helping determine whether plasma membrane proteins are degraded or routed to the plasma membrane; RCR1 has a paralog, RCR2, that arose from the whole genome duplication	0.273278	-0.0295577	0.241704	0.0549587	0.439679	0.143981	-0.495356	0.0491486	-0.222421	-0.252613	0.22641	0.822269	0.978505	0.987981	0.882396	0.83207	0.775238	0.76904	0.893906	0.921143	0.901092	0.850776	0
AAACAGGATGCCATTGATAA	+	chrII	248066	248088	Q354*	NA	NA	NA	NA	FALSE	neStops	YBR006W	UGA2	Succinate semialdehyde dehydrogenase; involved in the utilization of gamma-aminobutyrate (GABA) as a nitrogen source; part of the 4-aminobutyrate and glutamate degradation pathways; localized to the cytoplasm	0.180154	0.152375	0.152413	-0.50602	0.202919	-0.131446	-0.0854933	-0.189357	0.183963	0.287266	-0.0650564	0.907483	0.967033	0.990002	0.429062	0.899374	0.79927	0.999238	0.861496	0.937088	0.901092	0.940156	0
AGAATACAACACCAAGAGAG	+	chrII	247224	247246	T74I	NA	NA	-5.3	5.3	FALSE	neProvs	YBR006W	UGA2	Succinate semialdehyde dehydrogenase; involved in the utilization of gamma-aminobutyrate (GABA) as a nitrogen source; part of the 4-aminobutyrate and glutamate degradation pathways; localized to the cytoplasm	0.130334	-0.388082	-0.0160891	0.156947	-0.0556055	-0.0363004	0.470978	-0.250969	NA	0.0458094	0.460252	0.918895	0.88815	0.9985	0.844026	0.9137	0.862542	0.912036	0.857045	NA	0.903529	0.528843	0
AGGCAACCTGTTGGTGTATG	+	chrII	247460	247482	Q152*	P153F	NA	c(NA, -10.98)	10.98	FALSE	neStops	YBR006W	UGA2	Succinate semialdehyde dehydrogenase; involved in the utilization of gamma-aminobutyrate (GABA) as a nitrogen source; part of the 4-aminobutyrate and glutamate degradation pathways; localized to the cytoplasm	0.0357852	-0.245067	-0.194341	-0.185812	0.322241	0.0136792	-0.207055	-0.265825	0.217949	0.324017	0.283606	0.933108	0.891464	0.988598	0.791452	0.840548	0.86597	0.941251	0.827631	0.924709	0.885355	0.715892	0
GAATACAACACCAAGAGAGA	+	chrII	247225	247247	T74I	NA	NA	-5.3	5.3	FALSE	neProvs	YBR006W	UGA2	Succinate semialdehyde dehydrogenase; involved in the utilization of gamma-aminobutyrate (GABA) as a nitrogen source; part of the 4-aminobutyrate and glutamate degradation pathways; localized to the cytoplasm	0.335673	-0.0910235	-0.329386	0.0147505	0.129047	-0.656974	0.104731	-0.433011	-0.203575	-0.599824	0.209275	0.855235	0.971991	0.983555	0.892952	0.899374	0.336543	0.997916	0.761018	0.937088	0.864177	0.898132	0
ATACCACATTCGTACAAGGC	+	chrII	249062	249084	C650Y	G651N	NA	c(-7.755, -5.727)	7.755	FALSE	neProvs	YBR007C	DSF2	Deletion suppressor of mpt5 mutation; relocalizes from bud neck to cytoplasm upon DNA replication stress	-0.0235128	-0.0965002	-0.156858	-0.00383493	-0.206671	-0.0815927	0.280673	-0.417014	0.0809949	0.201074	0.422124	0.939576	0.971991	0.988601	0.898218	0.898896	0.834118	0.928825	0.758782	0.951995	0.901092	0.676162	0
CCTGCGACATGGCTGCGGAG	-	chrII	249231	249253	R590*	H591Y	NA	c(NA, 0.106)	0.106	FALSE	neStops	YBR007C	DSF2	Deletion suppressor of mpt5 mutation; relocalizes from bud neck to cytoplasm upon DNA replication stress	0.132362	0.0349257	-0.590085	0.312566	-0.122839	-0.0215285	0.282785	0.175433	NA	-0.645534	0.179627	0.918433	0.980103	0.837662	0.672942	0.899374	0.86394	0.937781	0.867273	NA	0.783383	0.921782	0
CTTACTTGCGTCACGTACAT	-	chrII	253854	253876	T113I	NA	NA	-6	6	FALSE	neProvs	YBR008C	FLR1	Plasma membrane transporter of the major facilitator superfamily; member of the 12-spanner drug:H(+) antiporter DHA1 family; involved in efflux of fluconazole, diazaborine, benomyl, methotrexate, and other drugs; expression induced in cells treated with the mycotoxin patulin; relocalizes from nucleus to plasma membrane upon DNA replication stress	0.102098	0.2723	-0.14714	0.225424	0.133761	0.309391	-0.0851103	0.219444	-0.176616	-0.499529	-0.16979	0.918433	0.889334	0.988601	0.718029	0.899374	0.57724	0.989323	0.835354	0.930165	0.602494	0.898132	0
GCATTCCCTATTGTATTTGT	-	chrII	253110	253132	P362F	NA	NA	-11	11	FALSE	neProvs	YBR008C	FLR1	Plasma membrane transporter of the major facilitator superfamily; member of the 12-spanner drug:H(+) antiporter DHA1 family; involved in efflux of fluconazole, diazaborine, benomyl, methotrexate, and other drugs; expression induced in cells treated with the mycotoxin patulin; relocalizes from nucleus to plasma membrane upon DNA replication stress	0.318687	-0.0291609	-0.455328	0.173005	0.341852	-0.20198	0.128499	0.32362	0.231125	-0.092823	-0.579437	0.850929	0.980103	0.967484	0.834613	0.875122	0.73918	0.98997	0.828188	0.933795	0.901092	0.545555	0
ATACTTCCCAGGTCTGTTGA	-	chrII	257423	257445	P180S	NA	NA	-7.97	7.97	TRUE	eProvs	YBR011C	IPP1	Cytoplasmic inorganic pyrophosphatase (PPase); homodimer that catalyzes the rapid exchange of oxygens from Pi with water, highly expressed and essential for viability, active-site residues show identity to those from E. coli PPase	-0.0539638	0.176106	-0.402186	-0.133658	0.110671	-0.0388469	-0.0340849	0.0652398	-0.387019	0.191846	0.097409	0.927158	0.925329	0.870274	0.8138	0.899374	0.857787	0.999238	0.890578	0.705908	0.901092	0.921782	0
CAACGATCCAATTGATGTGT	-	chrII	257606	257628	P119S	NA	NA	-7.976	7.976	TRUE	eProvs	YBR011C	IPP1	Cytoplasmic inorganic pyrophosphatase (PPase); homodimer that catalyzes the rapid exchange of oxygens from Pi with water, highly expressed and essential for viability, active-site residues show identity to those from E. coli PPase	0.00433755	0.0137963	-0.155876	-0.0585582	0.120017	0.318658	-0.219377	0.0505781	0.0874068	-0.059619	-0.18494	0.942127	0.980103	0.986573	0.863817	0.899374	0.295022	0.88205	0.890497	0.940889	0.901092	0.850156	0
CACCAACTGCCTTAGTTTCT	+	chrII	257630	257652	V114I	G115S	NA	c(-0.903, -5.982)	5.982	TRUE	eProvs	YBR011C	IPP1	Cytoplasmic inorganic pyrophosphatase (PPase); homodimer that catalyzes the rapid exchange of oxygens from Pi with water, highly expressed and essential for viability, active-site residues show identity to those from E. coli PPase	0.16206	0.0776455	0.0172155	0.0600763	0.152128	-0.0591896	0.203305	-0.227118	-0.083481	0.129505	-0.337045	0.876224	0.968562	0.9985	0.868579	0.896987	0.84735	0.938944	0.810553	0.951669	0.901092	0.613333	0
CACCCAGAAACTAAGGCAGT	-	chrII	257632	257654	P109L	NA	NA	-8.601	8.601	TRUE	eProvs	YBR011C	IPP1	Cytoplasmic inorganic pyrophosphatase (PPase); homodimer that catalyzes the rapid exchange of oxygens from Pi with water, highly expressed and essential for viability, active-site residues show identity to those from E. coli PPase	0.258385	0.236499	0.10543	0.0748866	-0.114266	-0.0792086	0.126888	-0.183949	-0.158112	0.0946956	0.087103	0.783609	0.812684	0.990002	0.846175	0.899374	0.801951	0.960695	0.830039	0.921009	0.901092	0.921782	0
CATCCCACCAGCTTCTCCAA	-	chrII	257171	257193	P263L	P264S	NA	c(-7.583, -2.125)	7.583	TRUE	eProvs	YBR011C	IPP1	Cytoplasmic inorganic pyrophosphatase (PPase); homodimer that catalyzes the rapid exchange of oxygens from Pi with water, highly expressed and essential for viability, active-site residues show identity to those from E. coli PPase	-0.157577	0.0246978	-0.136734	-0.0456199	0.0512223	0.03419	0.0349527	-0.0978415	-0.262485	0.0924832	0.0681131	0.87477	0.978346	0.988601	0.872368	0.899374	0.853363	0.999238	0.873873	0.807515	0.901092	0.929629	0
CATTCCCTTGTACGCTGACA	-	chrII	257858	257880	P34F	NA	NA	-10.607	10.607	TRUE	eProvs	YBR011C	IPP1	Cytoplasmic inorganic pyrophosphatase (PPase); homodimer that catalyzes the rapid exchange of oxygens from Pi with water, highly expressed and essential for viability, active-site residues show identity to those from E. coli PPase	-0.194327	0.268684	-0.012506	-0.0770267	0.261844	0.222029	0.0273162	0.345527	0.00207506	-0.13901	0.0119544	0.825229	0.82314	0.9985	0.865382	0.861241	0.585564	0.999238	0.69501	0.963142	0.901092	0.952099	0
CTTCACCGGAGAAGGCAAAT	+	chrII	257348	257370	G208N	E209K	NA	c(-5.987, -3.988)	5.987	TRUE	eProvs	YBR011C	IPP1	Cytoplasmic inorganic pyrophosphatase (PPase); homodimer that catalyzes the rapid exchange of oxygens from Pi with water, highly expressed and essential for viability, active-site residues show identity to those from E. coli PPase	0.503413	-0.0949543	-0.299029	0.0849362	0.363289	0.441356	0.343283	0.114862	-0.211046	0.0309924	-0.275364	0.596056	0.971991	0.988598	0.882396	0.871897	0.392781	0.912288	0.882769	0.937088	0.903529	0.850156	0
AGGCTTCAACGAAGTGGAAA	-	chrII	259295	259317	L85F	Q86*	NA	c(-3, NA)	3	FALSE	neStops	YBR012C	YBR012C	Dubious open reading frame; unlikely to encode a functional protein, based on available experimental and comparative sequence data; expression induced by iron-regulated transcriptional activator Aft2p	NA	-0.276699	-0.264934	0.105572	0.306554	-0.345959	0.0270429	-0.344149	NA	NA	0.681877	NA	0.936122	0.988601	0.869273	0.885221	0.67026	0.999797	0.853439	NA	NA	0.581159	0
AGTACGCAAAAGGGTATTGA	-	chrII	265787	265809	T26M	Q27*	NA	c(2, NA)	2	FALSE	neStops	YBR013C	YBR013C	Putative protein of unknown function; haploid deletion mutant exhibits synthetic phenotype with alpha-synuclein; SWAT-GFP fusion protein localizes to the endoplasmic reticulum while mCherry fusion protein localizes to both the endoplasmic reticulum and vacuole	-0.33839	-0.313992	0.420627	-0.265534	0.169737	-0.35149	0.155116	0.0443245	-0.211108	-0.277749	-0.169013	0.808403	0.886811	0.884221	0.7614	0.899374	0.542649	0.976256	0.897447	0.927502	0.901092	0.898132	0
GTACCACCGATGATAACGTT	+	chrII	266849	266871	G161N	G162N	NA	c(4.9, -5.984)	5.984	FALSE	neProvs	YBR014C	GRX7	Cis-golgi localized monothiol glutaredoxin; more similar in activity to dithiol than other monothiol glutaredoxins; involved in the oxidative stress response; does not bind metal ions; GRX7 has a paralog, GRX6, that arose from the whole genome duplication	0.0724328	0.168387	0.0615271	-0.0651889	-0.112187	-0.0214176	0.346171	-0.489166	0.0549725	-0.00108655	0.0424499	0.918539	0.936122	0.995762	0.870506	0.899374	0.86223	0.814465	0.516503	0.957553	0.917964	0.94171	0
GAACTTCCCGCCACCCACTG	+	chrII	268961	268983	G179E	NA	NA	-8	8	FALSE	neProvs	YBR015C	MNN2	Alpha-1,2-mannosyltransferase; responsible for addition of the first alpha-1,2-linked mannose to form the branches on the mannan backbone of oligosaccharides, localizes to an early Golgi compartment	0.178236	0.0973986	0.194396	-0.21395	-0.0233897	0.16269	0.0471863	-0.493098	0.102439	-0.0587479	0.0142482	0.877896	0.958707	0.988598	0.77008	0.9137	0.765237	0.999238	0.667135	0.944839	0.901092	0.952099	0
GACCCTTTGTACGTACCCTT	+	chrII	268992	269014	G170K	NA	NA	-5.667	5.667	FALSE	neProvs	YBR015C	MNN2	Alpha-1,2-mannosyltransferase; responsible for addition of the first alpha-1,2-linked mannose to form the branches on the mannan backbone of oligosaccharides, localizes to an early Golgi compartment	-0.150942	0.121332	0.14085	0.270931	0.0514285	0.0156731	0.220406	-0.178619	-0.139397	-0.0866691	-0.103993	0.907801	0.9567	0.988601	0.676268	0.899374	0.865404	0.925457	0.847024	0.934878	0.901092	0.921792	0
TACCAAGTTAGAACAAGGAC	-	chrII	268242	268264	Q415*	NA	NA	NA	NA	FALSE	neStops	YBR015C	MNN2	Alpha-1,2-mannosyltransferase; responsible for addition of the first alpha-1,2-linked mannose to form the branches on the mannan backbone of oligosaccharides, localizes to an early Golgi compartment	-0.0600639	0.31397	0.22603	0.0275151	0.17726	0.169409	-0.184673	-0.503141	-0.134547	-0.0180338	0.154363	0.931818	0.886811	0.988601	0.892952	0.899374	0.769837	0.974411	0.7827	0.942136	0.903745	0.921782	0
TCTCAAAAAGCTGCTGGTGA	-	chrII	268314	268336	Q391*	NA	NA	NA	NA	FALSE	neStops	YBR015C	MNN2	Alpha-1,2-mannosyltransferase; responsible for addition of the first alpha-1,2-linked mannose to form the branches on the mannan backbone of oligosaccharides, localizes to an early Golgi compartment	0.164593	0.329777	-1.15403	-0.442528	0.453614	-0.411773	-0.32274	NA	NA	NA	-0.436806	0.918539	0.91674	0.432928	0.681455	0.869472	0.598264	0.938944	NA	NA	NA	0.821073	0
CAACAACAACCACCCCAGAG	+	chrII	270541	270563	Q100*	Q101*	NA	c(NA, NA)	NA	FALSE	neStops	YBR016W	YBR016W	Tail-anchored plasma membrane protein with a conserved CYSTM module; predicted to be palmitoylated; has similarity to hydrophilins, which are involved in the adaptive response to hyperosmotic conditions; YBR016W has a paralog, YDL012C, that arose from the whole genome duplication	0.10681	0.103918	-0.296644	-0.102743	-0.117612	-0.481977	0.367316	0.0726958	-0.0809311	-0.341766	-0.0715325	0.918539	0.968218	0.983555	0.86	0.899374	0.402425	0.855798	0.890578	0.951998	0.891001	0.936596	0
CAGCAGGGATATAACCAACA	+	chrII	270496	270518	Q85*	NA	NA	NA	NA	FALSE	neStops	YBR016W	YBR016W	Tail-anchored plasma membrane protein with a conserved CYSTM module; predicted to be palmitoylated; has similarity to hydrophilins, which are involved in the adaptive response to hyperosmotic conditions; YBR016W has a paralog, YDL012C, that arose from the whole genome duplication	-0.118887	0.503061	0.173206	0.274888	0.293423	0.130951	-0.0403154	-0.0817623	0.40111	0.103516	0.0406884	0.909908	0.464127	0.988598	0.672942	0.836122	0.80536	0.999238	0.885754	0.779305	0.901092	0.945789	0
TCAGCAGGGCTACAATCAGC	+	chrII	270465	270487	Q75*	NA	NA	NA	NA	FALSE	neStops	YBR016W	YBR016W	Tail-anchored plasma membrane protein with a conserved CYSTM module; predicted to be palmitoylated; has similarity to hydrophilins, which are involved in the adaptive response to hyperosmotic conditions; YBR016W has a paralog, YDL012C, that arose from the whole genome duplication	NA	NA	-0.438669	0.563148	-0.0643344	-0.198425	NA	0.781288	0.653721	NA	NA	NA	NA	0.983555	0.685416	0.9137	0.801175	NA	0.671386	0.780084	NA	NA	0
ACAATGACATAGAATTCTAA	+	chrII	271781	271803	C639Y	NA	NA	-5.6	5.6	FALSE	neProvs	YBR017C	KAP104	Transportin or cytosolic karyopherin beta 2; functions in the rg-nuclear localization signal-mediated nuclear import/reimport of mRNA-binding proteins Nab2p and Hrp1p; regulates asymmetric protein synthesis in daughter cells during mitosis	0.0960086	-0.0160467	0.0946958	0.104388	0.0966345	0.0506698	-0.0788698	0.166142	0.0385934	-0.040737	-0.102535	0.907801	0.980103	0.990002	0.820157	0.899374	0.836975	0.983717	0.831107	0.958437	0.901092	0.911956	0
ACCTCATTAGATTTGATTGA	-	chrII	271692	271714	S665L	NA	NA	-5.667	5.667	FALSE	neProvs	YBR017C	KAP104	Transportin or cytosolic karyopherin beta 2; functions in the rg-nuclear localization signal-mediated nuclear import/reimport of mRNA-binding proteins Nab2p and Hrp1p; regulates asymmetric protein synthesis in daughter cells during mitosis	0.0674471	0.216997	0.0175052	-0.0325703	0.0274581	0.0180888	0.268735	0.123716	-0.0486609	0.0984894	-0.0647898	0.9186	0.886811	0.9985	0.883087	0.9137	0.863301	0.878436	0.863987	0.957553	0.901092	0.936086	0
CTTCATTCCACCTTCTGCCA	+	chrII	272342	272364	G452E	M453I	NA	c(-5.733, -1.55)	5.733	FALSE	neProvs	YBR017C	KAP104	Transportin or cytosolic karyopherin beta 2; functions in the rg-nuclear localization signal-mediated nuclear import/reimport of mRNA-binding proteins Nab2p and Hrp1p; regulates asymmetric protein synthesis in daughter cells during mitosis	0.0671225	0.041829	0.127171	0.0123606	-0.12248	-0.173503	0.122633	-0.138572	-0.0164412	0.13679	0.0416936	0.911485	0.971991	0.984551	0.892952	0.889216	0.536722	0.933341	0.834334	0.959677	0.901092	0.936086	0
GAAGCAACACTACTCCCTAC	-	chrII	273493	273515	Q65*	H66Y	NA	c(NA, -1.728)	1.728	FALSE	neStops	YBR017C	KAP104	Transportin or cytosolic karyopherin beta 2; functions in the rg-nuclear localization signal-mediated nuclear import/reimport of mRNA-binding proteins Nab2p and Hrp1p; regulates asymmetric protein synthesis in daughter cells during mitosis	0.0274286	-0.473929	-0.403281	0.356089	-0.32116	-0.0540505	0.328617	-0.0900148	0.184858	-0.165488	-0.230261	0.939576	0.785328	0.902034	0.724789	0.863138	0.848584	0.901754	0.890397	0.937088	0.901092	0.876579	0
TGCCGCCCTTAATTGAAAAA	-	chrII	271919	271941	P589L	P590F	NA	c(-9.38, -3.933)	9.38	FALSE	neProvs	YBR017C	KAP104	Transportin or cytosolic karyopherin beta 2; functions in the rg-nuclear localization signal-mediated nuclear import/reimport of mRNA-binding proteins Nab2p and Hrp1p; regulates asymmetric protein synthesis in daughter cells during mitosis	-0.0639825	0.0668583	-0.799021	0.0830795	0.105092	-0.10517	-0.00767452	0.007647	0.095273	0.345121	-0.0921344	0.925704	0.971991	0.0393333	0.852744	0.899374	0.799869	0.999797	0.907462	0.949322	0.882132	0.934728	1
AAGACCTTGGTTAGGTCAAC	-	chrII	275410	275432	P34F	NA	NA	-10.986	10.986	FALSE	neProvs	YBR018C	GAL7	Galactose-1-phosphate uridyl transferase; synthesizes glucose-1-phosphate and UDP-galactose from UDP-D-glucose and alpha-D-galactose-1-phosphate in the second step of galactose catabolism; human homolog UGP2 can complement yeast null mutant	0.170341	0.129484	0.219979	0.630474	0.115813	-0.119791	0.407572	0.00164002	-0.0207083	0.0620274	0.484758	0.850929	0.936122	0.983555	0.012886	0.899374	0.775351	0.639026	0.907462	0.960122	0.901092	0.3401	1
AATTAGCCAATTTAACCAAA	-	chrII	274729	274751	Q262*	NA	NA	NA	NA	FALSE	neStops	YBR018C	GAL7	Galactose-1-phosphate uridyl transferase; synthesizes glucose-1-phosphate and UDP-galactose from UDP-D-glucose and alpha-D-galactose-1-phosphate in the second step of galactose catabolism; human homolog UGP2 can complement yeast null mutant	0.0745362	-0.336794	0.329346	-0.0573335	-0.145822	-0.16647	-0.0448896	-0.39428	0.421775	-0.269239	0.0677809	0.928235	0.898117	0.983555	0.882396	0.899374	0.78224	0.999238	0.819109	0.807515	0.901092	0.939969	0
GTCCAAATATTTGAAAACAA	-	chrII	275016	275038	Q165*	NA	NA	NA	NA	FALSE	neStops	YBR018C	GAL7	Galactose-1-phosphate uridyl transferase; synthesizes glucose-1-phosphate and UDP-galactose from UDP-D-glucose and alpha-D-galactose-1-phosphate in the second step of galactose catabolism; human homolog UGP2 can complement yeast null mutant	-0.0795382	0.166273	0.0569776	-0.0233395	0.146916	-0.122214	-0.322835	0.601522	0.186455	-0.129497	-0.144082	0.929301	0.9567	0.995866	0.892952	0.899374	0.819628	0.913393	0.654227	0.937088	0.901092	0.921782	0
TTGGCCATGTGGATGTAAGT	+	chrII	274976	274998	G183N	NA	NA	-5.328	5.328	FALSE	neProvs	YBR018C	GAL7	Galactose-1-phosphate uridyl transferase; synthesizes glucose-1-phosphate and UDP-galactose from UDP-D-glucose and alpha-D-galactose-1-phosphate in the second step of galactose catabolism; human homolog UGP2 can complement yeast null mutant	-0.256137	0.247345	0.353759	-0.0188266	0.120729	-0.311693	-0.0813825	0.68851	-0.170234	-0.525301	0.648263	0.877896	0.925329	0.983555	0.892952	0.899374	0.679395	0.998299	0.722822	0.942567	0.86115	0.287657	0
ACTTGACGGCTAAACCAGAT	-	chrII	277381	277403	T319M	NA	NA	-5.511	5.511	FALSE	neProvs	YBR019C	GAL10	UDP-glucose-4-epimerase; catalyzes interconversion of UDP-galactose and UDP-D-glucose in galactose metabolism; also catalyzes conversion of alpha-D-glucose or alpha-D-galactose to their beta-anomers; human homolog GALE implicated in galactosemia, can complement yeast null mutant	0.206295	0.0856257	0.106598	-0.0909038	0.124977	-0.377166	-0.0792448	0.103762	0.0445162	0.0928243	0.0735502	0.86454	0.971606	0.990002	0.862662	0.899374	0.385257	0.997916	0.878505	0.959205	0.901092	0.934161	0
CTTGACGGCTAAACCAGATA	-	chrII	277380	277402	T319M	NA	NA	-5.511	5.511	FALSE	neProvs	YBR019C	GAL10	UDP-glucose-4-epimerase; catalyzes interconversion of UDP-galactose and UDP-D-glucose in galactose metabolism; also catalyzes conversion of alpha-D-glucose or alpha-D-galactose to their beta-anomers; human homolog GALE implicated in galactosemia, can complement yeast null mutant	-0.00375054	-0.290354	-0.0181081	-0.20843	-0.0510283	-0.0242245	0.281922	-0.0484056	-0.179741	-0.335901	0.317693	0.942278	0.846319	0.9985	0.769055	0.900168	0.861531	0.927709	0.892436	0.924709	0.891436	0.673555	0
TCTTCTCCGATTAATCCAGA	+	chrII	277733	277755	G205K	E206K	NA	c(-7.961, -3.972)	7.961	FALSE	neProvs	YBR019C	GAL10	UDP-glucose-4-epimerase; catalyzes interconversion of UDP-galactose and UDP-D-glucose in galactose metabolism; also catalyzes conversion of alpha-D-glucose or alpha-D-galactose to their beta-anomers; human homolog GALE implicated in galactosemia, can complement yeast null mutant	NA	NA	-0.490139	NA	NA	NA	NA	NA	NA	NA	NA	NA	NA	0.983555	NA	NA	NA	NA	NA	NA	NA	NA	0
TTACCAGTTAAGGGGTGTCG	-	chrII	277269	277291	Q356*	NA	NA	NA	NA	FALSE	neStops	YBR019C	GAL10	UDP-glucose-4-epimerase; catalyzes interconversion of UDP-galactose and UDP-D-glucose in galactose metabolism; also catalyzes conversion of alpha-D-glucose or alpha-D-galactose to their beta-anomers; human homolog GALE implicated in galactosemia, can complement yeast null mutant	NA	NA	-0.232326	NA	NA	-0.0957533	0.219748	-0.229584	NA	NA	0.690492	NA	NA	0.990002	NA	NA	0.846084	0.971349	0.864976	NA	NA	0.576445	0
TATAGACAGCTGCCCAATGC	-	chrII	280575	280597	C524Y	NA	NA	-6.516	6.516	FALSE	neProvs	YBR020W	GAL1	Galactokinase; phosphorylates alpha-D-galactose to alpha-D-galactose-1-phosphate in the first step of galactose catabolism; expression regulated by Gal4p; human homolog GALK2 complements yeast null mutant; GAL1 has a paralog, GAL3, that arose from the whole genome duplication	0.397529	0.10138	NA	0.460581	-0.0450768	-0.396509	NA	0.201677	-0.360417	-0.198568	0.731914	0.808403	0.971991	NA	0.708434	0.9137	0.639322	NA	0.876529	0.906685	0.901092	0.392422	0
AACCTCAATACAGCTCATTC	+	chrII	281636	281658	P66L	Q67*	NA	c(-0.895, NA)	0.895	FALSE	neStops	YBR021W	FUR4	Plasma membrane localized uracil permease; expression is tightly regulated by uracil levels and environmental cues; conformational alterations induced by unfolding or substrate binding result in Rsp5p-mediated ubiquitination and degradation	-0.00682467	-0.100155	0.578462	0.137757	-0.353803	-0.210985	0.17774	0.874805	0.240202	-0.0205627	-0.483367	0.942278	0.971991	0.885628	0.83949	0.873018	0.764426	0.970385	0.254568	0.930302	0.903566	0.649182	0
CTTGCCCGGTTTCATCGCGG	+	chrII	283038	283060	P534F	NA	NA	-7.903	7.903	FALSE	neProvs	YBR021W	FUR4	Plasma membrane localized uracil permease; expression is tightly regulated by uracil levels and environmental cues; conformational alterations induced by unfolding or substrate binding result in Rsp5p-mediated ubiquitination and degradation	0.264576	-0.087607	0.0119087	0.0807158	-0.0775246	-0.0195164	-0.190522	0.00800438	-0.0738678	0.0646675	0.0862297	0.725659	0.956706	0.9985	0.84251	0.899374	0.861242	0.906672	0.906049	0.948104	0.901092	0.921782	0
GTCTACAACTGGGTCTAAAT	+	chrII	281849	281871	Q138*	NA	NA	NA	NA	FALSE	neStops	YBR021W	FUR4	Plasma membrane localized uracil permease; expression is tightly regulated by uracil levels and environmental cues; conformational alterations induced by unfolding or substrate binding result in Rsp5p-mediated ubiquitination and degradation	-0.238845	0.0104065	0.149757	-0.257044	0.419298	-0.0315785	-0.287918	0.330039	-0.238729	-0.115647	0.524751	0.877896	0.980348	0.990002	0.761161	0.797631	0.862689	0.920937	0.804604	0.922535	0.901092	0.471168	0
TTTACAGACTACTTATAATA	+	chrII	282609	282631	Q391*	NA	NA	NA	NA	FALSE	neStops	YBR021W	FUR4	Plasma membrane localized uracil permease; expression is tightly regulated by uracil levels and environmental cues; conformational alterations induced by unfolding or substrate binding result in Rsp5p-mediated ubiquitination and degradation	0.196719	-0.310764	-0.464759	0.150508	-0.0299626	-0.402549	-0.0201745	0.518042	-0.0567857	-0.225092	0.158435	0.878257	0.878625	0.855506	0.834241	0.9137	0.479494	0.999797	0.669597	0.958437	0.901092	0.912094	0
AAACAGATAGTATGAATCAA	+	chrII	285956	285978	C656Y	NA	NA	-8.457	8.457	FALSE	neProvs	YBR023C	CHS3	Chitin synthase III; catalyzes the transfer of N-acetylglucosamine (GlcNAc) to chitin; required for synthesis of the majority of cell wall chitin, the chitin ring during bud emergence, and spore wall chitosan; contains overlapping di-leucine and di-acidic signals that mediate, respectively, intracellular trafficking by AP-1 and trafficking to plasma membrane by exomer complex; requires AP-3 compl…	0.0117739	0.298638	0.0326122	-0.16446	0.108039	-0.0863855	-0.048079	-0.362753	0.137635	-0.224863	0.19787	0.940823	0.852085	0.997755	0.78146	0.899374	0.820937	0.999238	0.69501	0.933136	0.901092	0.850156	0
AAGGCACAAGACGAGAATGA	-	chrII	284528	284550	A1127V	Q1128*	NA	c(-2.392, NA)	2.392	FALSE	neStops	YBR023C	CHS3	Chitin synthase III; catalyzes the transfer of N-acetylglucosamine (GlcNAc) to chitin; required for synthesis of the majority of cell wall chitin, the chitin ring during bud emergence, and spore wall chitosan; contains overlapping di-leucine and di-acidic signals that mediate, respectively, intracellular trafficking by AP-1 and trafficking to plasma membrane by exomer complex; requires AP-3 compl…	-0.355272	-0.184935	-0.00158128	0.371298	0.0933057	0.210325	-0.450397	-0.00208318	0.0681364	-0.182751	-0.0578352	0.850929	0.940874	0.999413	0.709405	0.899374	0.801175	0.855798	0.907462	0.959199	0.901092	0.942884	0
ATCCCGCAGAAAGCAAGAAT	+	chrII	287357	287379	C188Y	G189K	NA	c(1.669, -7.969)	7.969	FALSE	neProvs	YBR023C	CHS3	Chitin synthase III; catalyzes the transfer of N-acetylglucosamine (GlcNAc) to chitin; required for synthesis of the majority of cell wall chitin, the chitin ring during bud emergence, and spore wall chitosan; contains overlapping di-leucine and di-acidic signals that mediate, respectively, intracellular trafficking by AP-1 and trafficking to plasma membrane by exomer complex; requires AP-3 compl…	0.020876	0.0434293	-0.212854	-0.0480059	-0.105166	0.0792344	0.045231	0.153789	-0.0177522	0.0739459	0.0497321	0.934776	0.971991	0.983555	0.87033	0.899374	0.797989	0.995213	0.836619	0.960022	0.901092	0.936086	0
CATCTGACCAGGGCCCATAA	+	chrII	287091	287113	W276*	D278N	NA	c(NA, -0.094)	0.094	FALSE	neStops	YBR023C	CHS3	Chitin synthase III; catalyzes the transfer of N-acetylglucosamine (GlcNAc) to chitin; required for synthesis of the majority of cell wall chitin, the chitin ring during bud emergence, and spore wall chitosan; contains overlapping di-leucine and di-acidic signals that mediate, respectively, intracellular trafficking by AP-1 and trafficking to plasma membrane by exomer complex; requires AP-3 compl…	0.288077	-0.458082	NA	1.30384	0.0302576	NA	NA	1.15065	0.627085	NA	-0.0349165	0.89424	0.85085	NA	0.173144	0.915343	NA	NA	0.226673	0.780084	NA	0.952019	0
GAGCAGGGGGCCGCCAAACC	-	chrII	285581	285603	Q776*	NA	NA	NA	NA	FALSE	neStops	YBR023C	CHS3	Chitin synthase III; catalyzes the transfer of N-acetylglucosamine (GlcNAc) to chitin; required for synthesis of the majority of cell wall chitin, the chitin ring during bud emergence, and spore wall chitosan; contains overlapping di-leucine and di-acidic signals that mediate, respectively, intracellular trafficking by AP-1 and trafficking to plasma membrane by exomer complex; requires AP-3 compl…	-0.0310162	NA	-0.0176772	0.240257	-0.191491	0.521208	0.0244559	0.647305	0.00444788	-0.197432	0.084944	0.939241	NA	0.9985	0.804808	0.899374	0.571114	0.999797	0.688278	0.963142	0.901092	0.939969	0
GGTGATACGAGAACTATTGC	-	chrII	284561	284583	T1117M	NA	NA	-5.928	5.928	FALSE	neProvs	YBR023C	CHS3	Chitin synthase III; catalyzes the transfer of N-acetylglucosamine (GlcNAc) to chitin; required for synthesis of the majority of cell wall chitin, the chitin ring during bud emergence, and spore wall chitosan; contains overlapping di-leucine and di-acidic signals that mediate, respectively, intracellular trafficking by AP-1 and trafficking to plasma membrane by exomer complex; requires AP-3 compl…	-0.107427	-0.031077	0.0815605	-0.22391	0.00097493	-0.0178888	0.0800501	0.125765	0.471933	0.407443	0.196311	0.918539	0.978346	0.995762	0.739455	0.923901	0.865404	0.999238	0.878246	0.760861	0.863056	0.876579	0
TTGGCAGATTACGGGGCTAA	-	chrII	285453	285475	Q819*	NA	NA	NA	NA	FALSE	neStops	YBR023C	CHS3	Chitin synthase III; catalyzes the transfer of N-acetylglucosamine (GlcNAc) to chitin; required for synthesis of the majority of cell wall chitin, the chitin ring during bud emergence, and spore wall chitosan; contains overlapping di-leucine and di-acidic signals that mediate, respectively, intracellular trafficking by AP-1 and trafficking to plasma membrane by exomer complex; requires AP-3 compl…	0.104515	0.0935433	0.0115955	0.182717	0.0263509	-0.19718	0.21255	-0.313875	0.0634597	-0.40392	0.0710226	0.919376	0.971991	0.9985	0.810593	0.9137	0.74414	0.956924	0.796658	0.957361	0.901092	0.937026	0
AGGACAGTTTATCGATGCGT	+	chrII	290209	290231	Q257*	NA	NA	NA	NA	FALSE	neStops	YBR024W	SCO2	Protein anchored to mitochondrial inner membrane; may have a redundant function with Sco1p in delivery of copper to cytochrome c oxidase; interacts with Cox2p; SCO2 has a paralog, SCO1, that arose from the whole genome duplication	0.0346968	-0.275336	-0.00282902	-0.100459	0.138932	0.0541059	-0.0185129	0.0336252	0.102299	-0.321082	-0.135771	0.934322	0.870541	0.998814	0.850418	0.899374	0.847426	0.999797	0.898605	0.943862	0.859083	0.921782	0
GTATGTGCCAAAGGAAGAAC	+	chrII	290287	290309	P284S	NA	NA	-7.95	7.95	FALSE	neProvs	YBR024W	SCO2	Protein anchored to mitochondrial inner membrane; may have a redundant function with Sco1p in delivery of copper to cytochrome c oxidase; interacts with Cox2p; SCO2 has a paralog, SCO1, that arose from the whole genome duplication	0.1659	0.223298	-0.154176	-0.104365	0.273151	0.108741	0.520484	-0.264521	0.0528088	0.200573	0.299402	0.907801	0.903256	0.989055	0.850263	0.891084	0.815791	0.696581	0.831107	0.958453	0.901092	0.798737	0
CAACTTACCAGCGGCCTTGA	+	chrII	290756	290778	G368D	NA	NA	-6.852	6.852	FALSE	neProvs	YBR025C	OLA1	P-loop ATPase with similarity to human OLA1 and bacterial YchF; identified as specifically interacting with the proteasome; null mutant displays increased translation rate and increased readthrough of premature stop codons; protein abundance increases in response to hydrogen peroxide and to DNA replication stress	-0.0395169	0.00115964	0.0903271	0.0734576	0.0933163	0.0868812	0.337317	0.0842095	-0.300705	-0.116706	0.247528	0.93228	0.980591	0.990002	0.864313	0.899374	0.817069	0.819557	0.879376	0.803181	0.901092	0.767275	0
GCCATCACTAGATGTCCATT	-	chrII	291729	291751	T41I	NA	NA	-5.44	5.44	FALSE	neProvs	YBR025C	OLA1	P-loop ATPase with similarity to human OLA1 and bacterial YchF; identified as specifically interacting with the proteasome; null mutant displays increased translation rate and increased readthrough of premature stop codons; protein abundance increases in response to hydrogen peroxide and to DNA replication stress	-0.128818	-0.0182422	-0.0447872	-0.163844	0.112137	-0.356692	0.0710381	0.365485	-0.0380709	0.151316	0.058641	0.907801	0.980103	0.995762	0.801822	0.899374	0.436708	0.996942	0.687727	0.959199	0.901092	0.936086	0
GCCTCTGCTGGTGAAGGTTT	-	chrII	291546	291568	S101F	A102V	NA	c(-5.405, -0.497)	5.405	FALSE	neProvs	YBR025C	OLA1	P-loop ATPase with similarity to human OLA1 and bacterial YchF; identified as specifically interacting with the proteasome; null mutant displays increased translation rate and increased readthrough of premature stop codons; protein abundance increases in response to hydrogen peroxide and to DNA replication stress	0.0428407	0.0700079	0.059421	0.358747	-0.0856352	-0.167988	-0.297352	-0.489373	-0.358371	0.0520483	0.31537	0.9323	0.971991	0.995762	0.54789	0.899374	0.739443	0.855798	0.654994	0.800155	0.903529	0.664178	0
TGCCTCTGCTGGTGAAGGTT	-	chrII	291547	291569	S101F	NA	NA	-5.405	5.405	FALSE	neProvs	YBR025C	OLA1	P-loop ATPase with similarity to human OLA1 and bacterial YchF; identified as specifically interacting with the proteasome; null mutant displays increased translation rate and increased readthrough of premature stop codons; protein abundance increases in response to hydrogen peroxide and to DNA replication stress	0.0715619	0.249664	-0.577266	-0.176822	0.108882	-0.197564	-0.189982	-0.209208	-0.0206364	0.149911	0.120985	0.929023	0.93213	0.858691	0.835383	0.899374	0.768004	0.978357	0.862796	0.961765	0.901092	0.928647	0
TTCGCACAAAAGGCTTTGGA	-	chrII	291369	291391	A160V	Q161*	NA	c(2.124, NA)	2.124	FALSE	neStops	YBR025C	OLA1	P-loop ATPase with similarity to human OLA1 and bacterial YchF; identified as specifically interacting with the proteasome; null mutant displays increased translation rate and increased readthrough of premature stop codons; protein abundance increases in response to hydrogen peroxide and to DNA replication stress	NA	NA	0.394215	0.726282	-0.752826	-0.0520686	NA	NA	0.776851	-0.11704	0.294235	NA	NA	0.988598	0.305384	0.449459	0.859544	NA	NA	0.779305	0.901092	0.87395	0
TTGACTAAGGGTGCCTCTGC	-	chrII	291558	291580	T97I	NA	NA	-5.369	5.369	FALSE	neProvs	YBR025C	OLA1	P-loop ATPase with similarity to human OLA1 and bacterial YchF; identified as specifically interacting with the proteasome; null mutant displays increased translation rate and increased readthrough of premature stop codons; protein abundance increases in response to hydrogen peroxide and to DNA replication stress	-0.0552881	-0.183653	-0.0521896	0.185297	-0.0361874	-0.0354124	-0.389128	0.122718	-0.508721	-0.0484741	0.0455119	0.92679	0.908354	0.995762	0.773455	0.9137	0.855249	0.829604	0.873434	0.567672	0.901092	0.939969	0
TCCCATTGCAGGCAAATCAA	-	chrII	293642	293664	P120L	NA	NA	-9.889	9.889	FALSE	neProvs	YBR026C	ETR1	2-enoyl thioester reductase; member of the medium chain dehydrogenase/reductase family; localized to mitochondria, where it has a probable role in fatty acid synthesis; human MECR functionally complements the respiratory growth defect of the null mutant	-0.29669	0.0142363	0.111237	-0.21386	-0.0812928	-0.0621829	-0.112984	0.012738	-0.214857	0.146729	0.0197847	0.808625	0.980103	0.990002	0.762936	0.899374	0.845683	0.987081	0.905501	0.922535	0.901092	0.952099	0
AATACCATAAATAAGGAAGA	+	chrII	294201	294223	G51N	NA	NA	-6	6	FALSE	neProvs	YBR027C	YBR027C	Putative protein of unknown function; conserved among S. cerevisiae strains; YBR027C is not an essential gene	-0.0118413	0.492501	-0.0359422	-0.444962	0.1413	0.183152	0.16427	-0.419774	0.410518	-0.206262	0.185956	0.942127	0.702625	0.997929	0.610306	0.899374	0.748982	0.983717	0.774542	0.886188	0.901092	0.911956	0
ACGCACGAGTGGTGTACCCA	-	chrII	294112	294134	H76Y	NA	NA	-6	6	FALSE	neProvs	YBR027C	YBR027C	Putative protein of unknown function; conserved among S. cerevisiae strains; YBR027C is not an essential gene	0.223782	-0.105363	0.15458	-0.0458947	0.175807	0.224761	0.267299	0.532599	0.193733	-0.219753	0.29216	0.855242	0.968562	0.988601	0.882396	0.898896	0.740859	0.915884	0.654227	0.928291	0.901092	0.798737	0
ACGTACATTGTCATTTAAGA	-	chrII	294054	294076	H96Y	NA	NA	-6	6	FALSE	neProvs	YBR027C	YBR027C	Putative protein of unknown function; conserved among S. cerevisiae strains; YBR027C is not an essential gene	0.0589574	-0.19823	-0.123097	-0.121523	-0.0425114	-0.0230496	-0.00370986	0.0381561	-0.255735	0.0382658	0.066744	0.925848	0.912113	0.989463	0.835383	0.912792	0.863301	0.999797	0.895476	0.900347	0.903529	0.935964	0
TACACCACTCGTGCGTCCCT	+	chrII	294119	294141	W78*	NA	NA	NA	NA	FALSE	neStops	YBR027C	YBR027C	Putative protein of unknown function; conserved among S. cerevisiae strains; YBR027C is not an essential gene	0.216209	0.278652	-0.474048	-0.0178949	0.426317	0.167406	-0.140444	-0.00633567	0.149185	-0.0946019	-0.4256	0.868424	0.846319	0.768865	0.892952	0.47167	0.719542	0.968105	0.907462	0.930302	0.901092	0.328086	0
AAGATTCAACAAAACAAGCA	-	chrII	294864	294886	Q375*	NA	NA	NA	NA	FALSE	neStops	YBR028C	YPK3	AGC kinase; phosphorylated by cAMP-dependent protein kinase (PKA) in a TORC1-dependent manner; directly phosphorylated by TORC1; phosphorylates ribosomal protein Rps6a/b (S6), in a TORC-dependent manner; undergoes autophosphorylation	-0.342116	0.0165245	0.0221408	0.436131	-0.292358	-0.235065	-0.462635	-0.350927	-0.0888888	0.0590267	-0.13977	0.850929	0.980118	0.9985	0.672803	0.875152	0.739057	0.829604	0.804604	0.955023	0.903529	0.921782	0
CAATTGCAAAAAACCACTCT	-	chrII	294615	294637	Q458*	NA	NA	NA	NA	FALSE	neStops	YBR028C	YPK3	AGC kinase; phosphorylated by cAMP-dependent protein kinase (PKA) in a TORC1-dependent manner; directly phosphorylated by TORC1; phosphorylates ribosomal protein Rps6a/b (S6), in a TORC-dependent manner; undergoes autophosphorylation	-0.122507	-0.0340353	0.11476	-0.095398	-0.0500838	-0.0136439	-0.0592575	-0.151402	0.108397	-0.0921953	0.363039	0.902273	0.977672	0.988601	0.842356	0.899374	0.865699	0.996533	0.861388	0.940762	0.901092	0.447566	0
CTGCTACAATATATCCCTGG	-	chrII	295293	295315	Q232*	NA	NA	NA	NA	FALSE	neStops	YBR028C	YPK3	AGC kinase; phosphorylated by cAMP-dependent protein kinase (PKA) in a TORC1-dependent manner; directly phosphorylated by TORC1; phosphorylates ribosomal protein Rps6a/b (S6), in a TORC-dependent manner; undergoes autophosphorylation	0.262403	-0.262999	-0.0234532	-0.0283181	-0.207216	-0.483119	-0.272111	0.0295402	-0.307441	-0.0840911	-0.545601	0.877896	0.925329	0.9985	0.892952	0.899374	0.406637	0.941251	0.902169	0.906685	0.901092	0.31477	0
TACCGTAGGCACCTTGGCCT	+	chrII	295582	295604	G140S	NA	NA	-5.667	5.667	FALSE	neProvs	YBR028C	YPK3	AGC kinase; phosphorylated by cAMP-dependent protein kinase (PKA) in a TORC1-dependent manner; directly phosphorylated by TORC1; phosphorylates ribosomal protein Rps6a/b (S6), in a TORC-dependent manner; undergoes autophosphorylation	-0.0131932	-0.192681	0.00501621	-0.552859	-0.0377509	-0.116423	0.154678	-0.2067	-0.166516	-0.426539	0.113688	0.940823	0.936122	0.9985	0.304245	0.9137	0.79927	0.969132	0.853676	0.922783	0.817342	0.925561	0
AAAACTTTAGAAGGTTTCCT	-	chrII	296970	296992	T252I	NA	NA	-6	6	TRUE	eProvs	YBR029C	CDS1	Phosphatidate cytidylyltransferase (CDP-diglyceride synthetase); an enzyme that catalyzes that conversion of CTP + phosphate into diphosphate + CDP-diaclglyerol, a critical step in the synthesis of all major yeast phospholipids; human homolog CDS1 can complement yeast cds1 null mutant	-0.0897868	0.191095	0.00867313	-0.621678	-0.553247	-0.20305	-0.262357	0.481983	-0.251316	-0.451853	0.00797891	0.918539	0.925329	0.9985	0.163944	0.495143	0.709894	0.890486	0.59088	0.914761	0.741824	0.953669	0
ACCACTATCTATTACTTAGA	-	chrII	297339	297361	T129I	NA	NA	-5.233	5.233	TRUE	eProvs	YBR029C	CDS1	Phosphatidate cytidylyltransferase (CDP-diglyceride synthetase); an enzyme that catalyzes that conversion of CTP + phosphate into diphosphate + CDP-diaclglyerol, a critical step in the synthesis of all major yeast phospholipids; human homolog CDS1 can complement yeast cds1 null mutant	-0.166409	0.0635757	0.00885032	-0.109472	-0.0180052	-0.215884	-0.281444	0.136771	0.186789	-0.237123	0.347411	0.880627	0.971991	0.9985	0.835383	0.9137	0.666551	0.855798	0.870778	0.92234	0.901092	0.655504	0
CACCATGGCCTGGGATGGAG	+	chrII	296632	296654	G370S	NA	NA	-5.981	5.981	TRUE	eProvs	YBR029C	CDS1	Phosphatidate cytidylyltransferase (CDP-diglyceride synthetase); an enzyme that catalyzes that conversion of CTP + phosphate into diphosphate + CDP-diaclglyerol, a critical step in the synthesis of all major yeast phospholipids; human homolog CDS1 can complement yeast cds1 null mutant	NA	0.316072	-0.751121	NA	-0.839185	NA	NA	NA	NA	NA	0.409802	NA	0.925329	0.766193	NA	0.524108	NA	NA	NA	NA	NA	0.898132	0
CCACTATCTATTACTTAGAT	-	chrII	297338	297360	T129I	NA	NA	-5.233	5.233	TRUE	eProvs	YBR029C	CDS1	Phosphatidate cytidylyltransferase (CDP-diglyceride synthetase); an enzyme that catalyzes that conversion of CTP + phosphate into diphosphate + CDP-diaclglyerol, a critical step in the synthesis of all major yeast phospholipids; human homolog CDS1 can complement yeast cds1 null mutant	0.166122	0.0732815	0.307373	0.336955	-0.142193	-0.0432272	-0.0668289	0.17578	-0.376839	-0.134319	-0.170761	0.880627	0.971991	0.942378	0.541947	0.899374	0.85079	0.996691	0.857328	0.829443	0.901092	0.875473	0
GATACCACCATGGCCTGGGA	+	chrII	296627	296649	G370D	G371N	NA	c(-6.978, -5.981)	6.978	TRUE	eProvs	YBR029C	CDS1	Phosphatidate cytidylyltransferase (CDP-diglyceride synthetase); an enzyme that catalyzes that conversion of CTP + phosphate into diphosphate + CDP-diaclglyerol, a critical step in the synthesis of all major yeast phospholipids; human homolog CDS1 can complement yeast cds1 null mutant	NA	NA	NA	NA	NA	NA	0.69552	NA	NA	NA	NA	NA	NA	NA	NA	NA	NA	0.855798	NA	NA	NA	NA	0
GCATCATTATTTGCGCCATT	-	chrII	296706	296728	S340L	NA	NA	-5.981	5.981	TRUE	eProvs	YBR029C	CDS1	Phosphatidate cytidylyltransferase (CDP-diglyceride synthetase); an enzyme that catalyzes that conversion of CTP + phosphate into diphosphate + CDP-diaclglyerol, a critical step in the synthesis of all major yeast phospholipids; human homolog CDS1 can complement yeast cds1 null mutant	0.320006	1.20018	1.04747	0.127715	0.237645	-0.33181	0.5687	0.499352	-0.90463	-0.172234	0.213466	0.756709	7.66175e-10	3.06802e-05	0.831992	0.874925	0.446175	0.356793	0.685866	0.02556	0.901092	0.87395	3
GGGCACGTCAAGTAAGTATA	+	chrII	296895	296917	C282Y	NA	NA	-11	11	TRUE	eProvs	YBR029C	CDS1	Phosphatidate cytidylyltransferase (CDP-diglyceride synthetase); an enzyme that catalyzes that conversion of CTP + phosphate into diphosphate + CDP-diaclglyerol, a critical step in the synthesis of all major yeast phospholipids; human homolog CDS1 can complement yeast cds1 null mutant	0.0710377	0.416132	0.120969	-0.188533	0.242959	0.360704	-0.000537208	0.0767796	-0.0152776	0.336939	-0.0830502	0.921387	0.714548	0.990002	0.805117	0.875057	0.496682	0.999971	0.890241	0.961765	0.882473	0.936086	0
TAACGCACAATGATCCGAAC	+	chrII	297166	297188	C191Y	V192I	NA	c(-10.9, -0.017)	10.9	TRUE	eProvs	YBR029C	CDS1	Phosphatidate cytidylyltransferase (CDP-diglyceride synthetase); an enzyme that catalyzes that conversion of CTP + phosphate into diphosphate + CDP-diaclglyerol, a critical step in the synthesis of all major yeast phospholipids; human homolog CDS1 can complement yeast cds1 null mutant	0.21576	0.189451	0.232262	-0.301307	0.0266336	0.353119	0.222364	0.829745	0.172971	-0.151235	-0.0107914	0.854459	0.925329	0.983555	0.741486	0.9137	0.522306	0.934759	0.251702	0.930302	0.901092	0.9526	0
TACCGAATGTAATGCCGCAC	+	chrII	297022	297044	G240S	NA	NA	-6	6	TRUE	eProvs	YBR029C	CDS1	Phosphatidate cytidylyltransferase (CDP-diglyceride synthetase); an enzyme that catalyzes that conversion of CTP + phosphate into diphosphate + CDP-diaclglyerol, a critical step in the synthesis of all major yeast phospholipids; human homolog CDS1 can complement yeast cds1 null mutant	0.0268656	0.371822	0.139631	0.227838	-0.192892	-0.247207	-0.286372	-0.0745954	-0.063879	-0.0667715	-0.151185	0.939576	0.815975	0.990002	0.7914	0.897754	0.709894	0.925101	0.890578	0.958437	0.901092	0.921782	0
TACTCATATGGTTCTTCTTC	-	chrII	297145	297167	H194Y	NA	NA	-5.8	5.8	TRUE	eProvs	YBR029C	CDS1	Phosphatidate cytidylyltransferase (CDP-diglyceride synthetase); an enzyme that catalyzes that conversion of CTP + phosphate into diphosphate + CDP-diaclglyerol, a critical step in the synthesis of all major yeast phospholipids; human homolog CDS1 can complement yeast cds1 null mutant	0.363617	0.113452	0.516793	-0.0220857	0.148535	-0.269779	0.423424	0.0520358	-0.439309	-0.137262	-0.17873	0.725659	0.968218	0.861934	0.892952	0.899374	0.669046	0.706995	0.892341	0.768501	0.901092	0.898132	0
TGGACGTTTGTTATGATCAG	-	chrII	297519	297541	T69M	NA	NA	-5.567	5.567	TRUE	eProvs	YBR029C	CDS1	Phosphatidate cytidylyltransferase (CDP-diglyceride synthetase); an enzyme that catalyzes that conversion of CTP + phosphate into diphosphate + CDP-diaclglyerol, a critical step in the synthesis of all major yeast phospholipids; human homolog CDS1 can complement yeast cds1 null mutant	0.0406639	0.524685	0.580543	0.14101	-0.0174166	-0.0418051	0.185314	0.555801	0.168173	0.176886	0.591242	0.934133	0.37491	0.648661	0.825063	0.916601	0.857787	0.953661	0.69665	0.937088	0.901092	0.216253	0
AAGGCCCACGTTGAGGGTGA	-	chrII	299630	299652	W452*	A453T	NA	c(NA, -3.097)	3.097	FALSE	neStops	YBR030W	RKM3	Ribosomal lysine methyltransferase; specific for monomethylation of Rpl42ap and Rpl42bp (lysine 40); nuclear SET domain containing protein; relocalizes to the cytosol in response to hypoxia	NA	NA	-0.465979	NA	0.28411	-0.245577	-0.571563	NA	NA	NA	NA	NA	NA	0.988598	NA	0.899374	0.793197	0.875546	NA	NA	NA	NA	0
TGCTCGAACACTTGTACAAT	+	chrII	299887	299909	R534*	NA	NA	NA	NA	FALSE	neStops	YBR030W	RKM3	Ribosomal lysine methyltransferase; specific for monomethylation of Rpl42ap and Rpl42bp (lysine 40); nuclear SET domain containing protein; relocalizes to the cytosol in response to hypoxia	-0.120589	0.190705	0.107156	-0.0683241	0.341312	-0.188638	0.167501	-0.0272629	-0.0234767	-0.306878	-0.0901513	0.911455	0.955623	0.990002	0.882396	0.863138	0.752735	0.971349	0.902804	0.961753	0.90095	0.936086	0
AACAGTTCCCATCAAGTCTT	-	chrII	304249	304271	G774E	NA	NA	-6.027	6.027	FALSE	neProvs	YBR033W	EDS1	Putative zinc cluster protein, predicted to be a transcription factor; not an essential gene; EDS1 has a paralog, RGT1, that arose from the whole genome duplication	-0.0375731	0.0114546	0.132658	0.210355	-0.0312818	0.0597317	0.151624	-0.727945	0.053838	-0.231561	0.301241	0.929824	0.980103	0.988598	0.668784	0.9137	0.825316	0.941251	0.0881824	0.956949	0.885443	0.495278	0
TAAATCAGTCAGTTTCTTCG	+	chrII	302029	302051	Q31*	NA	NA	NA	NA	FALSE	neStops	YBR033W	EDS1	Putative zinc cluster protein, predicted to be a transcription factor; not an essential gene; EDS1 has a paralog, RGT1, that arose from the whole genome duplication	0.042494	0.306829	-0.352561	0.430862	-0.270441	0.426166	0.356964	0.631494	0.174517	-0.0783825	-0.153021	0.934776	0.870541	0.983555	0.536455	0.884317	0.448983	0.893962	0.539324	0.935848	0.901092	0.921782	0
AAGAGACAAGATATGATTAA	-	chrII	305219	305241	Q248*	NA	NA	NA	NA	FALSE	neStops	YBR034C	HMT1	Nuclear SAM-dependent mono- and asymmetric methyltransferase; modifies hnRNPs, including Npl3p and Hrp1p, affecting their activity and nuclear export; methylates U1 snRNP protein Snp1p, ribosomal protein Rps2p, and histones H3 and H4; interacts genetically with genes encoding components of Rpd3(L) and this interaction is important for Rpd3 recruitment to the subtelomeric region	0.00713168	-0.30203	-0.0170322	0.233714	-0.000940614	-0.370833	0.411042	0.0991228	-0.141534	-0.25057	-0.455471	0.942127	0.925329	0.9985	0.7914	0.923901	0.549056	0.856511	0.888692	0.943604	0.901092	0.564074	0
CGAGCCCATCGTCGACACCG	-	chrII	305346	305368	P205F	NA	NA	-10.939	10.939	FALSE	neProvs	YBR034C	HMT1	Nuclear SAM-dependent mono- and asymmetric methyltransferase; modifies hnRNPs, including Npl3p and Hrp1p, affecting their activity and nuclear export; methylates U1 snRNP protein Snp1p, ribosomal protein Rps2p, and histones H3 and H4; interacts genetically with genes encoding components of Rpd3(L) and this interaction is important for Rpd3 recruitment to the subtelomeric region	0.0493642	0.110278	0.0319567	0.273109	0.219567	0.181119	0.000928299	-0.437097	-0.259712	0.101417	-0.0458097	0.919568	0.936122	0.995762	0.42432	0.804959	0.578097	0.999877	0.396695	0.779305	0.901092	0.936086	0
GACCGCCTTCTACCAAATAG	+	chrII	305499	305521	G158N	G159S	NA	c(-3.204, -6)	6	FALSE	neProvs	YBR034C	HMT1	Nuclear SAM-dependent mono- and asymmetric methyltransferase; modifies hnRNPs, including Npl3p and Hrp1p, affecting their activity and nuclear export; methylates U1 snRNP protein Snp1p, ribosomal protein Rps2p, and histones H3 and H4; interacts genetically with genes encoding components of Rpd3(L) and this interaction is important for Rpd3 recruitment to the subtelomeric region	-0.342396	-0.131601	-0.0709326	0.173516	0.0348764	-0.321111	0.325611	-0.158043	0.4966	-0.286281	-0.0321766	0.825229	0.9567	0.995762	0.811093	0.9137	0.604106	0.905916	0.872795	0.775869	0.901092	0.951527	0
TTCCAAACCGGCCAAATGAA	+	chrII	305455	305477	G172D	NA	NA	-5.193	5.193	FALSE	neProvs	YBR034C	HMT1	Nuclear SAM-dependent mono- and asymmetric methyltransferase; modifies hnRNPs, including Npl3p and Hrp1p, affecting their activity and nuclear export; methylates U1 snRNP protein Snp1p, ribosomal protein Rps2p, and histones H3 and H4; interacts genetically with genes encoding components of Rpd3(L) and this interaction is important for Rpd3 recruitment to the subtelomeric region	0.0650607	-0.580546	-0.20732	0.0183031	0.0366047	-0.108742	0.216603	0.0561808	-0.414157	-0.254715	0.0402479	0.931081	0.567937	0.988598	0.892952	0.9137	0.822497	0.961514	0.89452	0.865143	0.901092	0.950364	0
AGACCTCGTGGATCCAAGAT	-	chrII	306516	306538	P141F	R142C	NA	c(-9.6, -7.881)	9.6	FALSE	neProvs	YBR035C	PDX3	Pyridoxine (pyridoxamine) phosphate oxidase; has homologs in E. coli and Myxococcus xanthus; transcription is under the general control of nitrogen metabolism	0.0361484	-0.000406447	0.0686506	0.407951	0.0659369	0.236474	0.0358287	-0.224442	-0.140775	-0.105952	0.0133678	0.932877	0.981362	0.994451	0.265483	0.899374	0.527996	0.999238	0.8113	0.928291	0.901092	0.95205	0
TGCCAGAACTCAATTTCCAG	+	chrII	306357	306379	W199*	NA	NA	NA	NA	FALSE	neStops	YBR035C	PDX3	Pyridoxine (pyridoxamine) phosphate oxidase; has homologs in E. coli and Myxococcus xanthus; transcription is under the general control of nitrogen metabolism	0.119471	NA	-0.298934	0.267253	NA	-0.0560362	-0.226516	-0.331452	-0.345417	-0.0358031	NA	0.918539	NA	0.988601	0.790008	NA	0.859544	0.969132	0.855324	0.924672	0.903529	NA	0
CTGACCCATTCTTGTTTGAT	-	chrII	309585	309607	P238L	NA	NA	-8.267	8.267	FALSE	neProvs	YBR036C	CSG2	Endoplasmic reticulum membrane protein; required for mannosylation of inositolphosphorylceramide and for growth at high calcium concentrations; protein abundance increases in response to DNA replication stress	-0.317155	0.00488807	-0.00891225	-0.32984	-0.10424	-0.077011	-0.252617	-0.332043	0.420579	0.544914	0.208854	0.743276	0.980348	0.9985	0.67615	0.899374	0.837073	0.920019	0.800227	0.812962	0.712464	0.87395	0
GGTGCCTGCATCTCGACTTT	-	chrII	310088	310110	P70F	NA	NA	-8.733	8.733	FALSE	neProvs	YBR036C	CSG2	Endoplasmic reticulum membrane protein; required for mannosylation of inositolphosphorylceramide and for growth at high calcium concentrations; protein abundance increases in response to DNA replication stress	-0.0684425	-0.0751875	-0.0905694	-0.0764209	-0.0313287	-0.0914431	-0.0690643	-0.562155	0.170292	0.176432	0.0232227	0.921387	0.968218	0.990002	0.85449	0.9137	0.793233	0.994747	0.472283	0.924709	0.901092	0.951527	0
GGTTAAGCAGAGCACCCACA	-	chrII	309446	309468	Q285*	NA	NA	NA	NA	FALSE	neStops	YBR036C	CSG2	Endoplasmic reticulum membrane protein; required for mannosylation of inositolphosphorylceramide and for growth at high calcium concentrations; protein abundance increases in response to DNA replication stress	0.244513	NA	0.0871689	-0.0202969	0.367473	-0.0183629	NA	-0.462929	-0.128172	0.304602	NA	0.880018	NA	0.995866	0.892952	0.875057	0.866269	NA	0.831107	0.951416	0.901092	NA	0
AGGACAGTTTGTTGATGCTT	-	chrII	310684	310706	Q251*	NA	NA	NA	NA	FALSE	neStops	YBR037C	SCO1	Copper-binding protein of mitochondrial inner membrane; required for cytochrome c oxidase activity and respiration; may function to deliver copper to cytochrome c oxidase; similar to thioredoxins; SCO1 has a paralog, SCO2, that arose from the whole genome duplication	0.401106	-0.118528	-0.409731	0.0723643	0.353812	0.441938	-0.48994	0.363211	-0.154006	-0.0226147	-0.0535602	0.799151	0.968562	0.959848	0.880777	0.863138	0.493182	0.855798	0.810553	0.949708	0.903529	0.946119	0
CGACTTTCATCCCTCCATCC	-	chrII	310843	310865	H199Y	NA	NA	-5.987	5.987	FALSE	neProvs	YBR037C	SCO1	Copper-binding protein of mitochondrial inner membrane; required for cytochrome c oxidase activity and respiration; may function to deliver copper to cytochrome c oxidase; similar to thioredoxins; SCO1 has a paralog, SCO2, that arose from the whole genome duplication	0.0479041	-0.0976162	0.057876	0.0309588	-0.0530595	0.0669075	0.0477502	-0.108731	0.0867746	0.112484	0.0671467	0.921387	0.93642	0.990002	0.882396	0.899374	0.808975	0.990602	0.850073	0.937088	0.901092	0.921782	0
GGATCACAAGTTATAAATAA	+	chrII	310905	310927	C181Y	D182N	NA	c(-10.794, -4.906)	10.794	FALSE	neProvs	YBR037C	SCO1	Copper-binding protein of mitochondrial inner membrane; required for cytochrome c oxidase activity and respiration; may function to deliver copper to cytochrome c oxidase; similar to thioredoxins; SCO1 has a paralog, SCO2, that arose from the whole genome duplication	-0.0122822	-0.051564	0.0646697	0.00479842	-0.0430381	0.0649311	0.00515412	-0.166934	0.474196	-0.0854653	-0.191914	0.940933	0.974437	0.995762	0.896157	0.9137	0.844786	0.999797	0.862796	0.631633	0.901092	0.87395	0
GTACCATGCCTCCTTCTGCT	+	chrII	310583	310605	W289*	NA	NA	NA	NA	FALSE	neStops	YBR037C	SCO1	Copper-binding protein of mitochondrial inner membrane; required for cytochrome c oxidase activity and respiration; may function to deliver copper to cytochrome c oxidase; similar to thioredoxins; SCO1 has a paralog, SCO2, that arose from the whole genome duplication	-0.0849065	0.273499	0.05565	0.0352602	0.199855	-0.134821	0.414689	0.203041	-0.266578	-0.283496	0.0898238	0.918539	0.843673	0.995762	0.882585	0.875122	0.740711	0.471124	0.8254	0.848111	0.874905	0.925561	0
TGGGGGACCCTTCCATCTGG	-	chrII	311086	311108	P118S	NA	NA	-6.133	6.133	FALSE	neProvs	YBR037C	SCO1	Copper-binding protein of mitochondrial inner membrane; required for cytochrome c oxidase activity and respiration; may function to deliver copper to cytochrome c oxidase; similar to thioredoxins; SCO1 has a paralog, SCO2, that arose from the whole genome duplication	-0.144387	-0.0423179	-0.0320734	0.132461	0.268882	0.0937284	-0.212282	0.0493781	-0.350244	-0.0263154	0.0207049	0.877896	0.974539	0.997475	0.835383	0.856365	0.819779	0.912288	0.892341	0.779622	0.903529	0.952019	0
AGACAAAAAACCAATTGCAC	-	chrII	313104	313126	C409Y	NA	NA	-10.158	10.158	TRUE	eProvs	YBR038W	CHS2	Chitin synthase II; catalyzes transfer of N-acetylglucosamine (GlcNAc) to chitin upon activation of zymogenic form; required for chitin synthesis in the primary septum during cytokinesis; localization regulated by Cdk1p during mitosis; phosphorylation by Dbf2p kinase regulates its dynamics and chitin synthesis during cytokinesis	0.352903	0.0701172	0.0928657	-0.203848	0.221115	0.332758	-0.395517	0.0899342	0.0584614	0.200528	0.0098374	0.745801	0.971991	0.995762	0.786258	0.891921	0.602146	0.829604	0.887965	0.957553	0.901092	0.9526	0
ATCTCATTGCTCTCCACCTA	+	chrII	314145	314167	S751L	NA	NA	-5.942	5.942	TRUE	eProvs	YBR038W	CHS2	Chitin synthase II; catalyzes transfer of N-acetylglucosamine (GlcNAc) to chitin upon activation of zymogenic form; required for chitin synthesis in the primary septum during cytokinesis; localization regulated by Cdk1p during mitosis; phosphorylation by Dbf2p kinase regulates its dynamics and chitin synthesis during cytokinesis	-0.240027	0.0692942	-0.0379257	-0.0780974	-0.0475642	0.0183883	-0.0541004	-0.227852	0.0420525	0.188228	0.0149565	0.78015	0.968562	0.995762	0.856547	0.899374	0.861865	0.995843	0.806688	0.958237	0.901092	0.95205	0
CATGGAACCAACCACCCTAA	-	chrII	314647	314669	G922D	NA	NA	-6.231	6.231	TRUE	eProvs	YBR038W	CHS2	Chitin synthase II; catalyzes transfer of N-acetylglucosamine (GlcNAc) to chitin upon activation of zymogenic form; required for chitin synthesis in the primary septum during cytokinesis; localization regulated by Cdk1p during mitosis; phosphorylation by Dbf2p kinase regulates its dynamics and chitin synthesis during cytokinesis	-0.0217781	0.602421	0.0396011	-0.359585	0.0885677	0.366595	-0.25997	0.497787	-0.178705	0.115858	-0.0314199	0.939576	0.56964	0.99623	0.610935	0.899374	0.493182	0.927307	0.69665	0.932346	0.901092	0.951527	0
CCCGATACCAAAAGGTCTGT	+	chrII	312620	312642	P244S	NA	NA	-7.842	7.842	TRUE	eProvs	YBR038W	CHS2	Chitin synthase II; catalyzes transfer of N-acetylglucosamine (GlcNAc) to chitin upon activation of zymogenic form; required for chitin synthesis in the primary septum during cytokinesis; localization regulated by Cdk1p during mitosis; phosphorylation by Dbf2p kinase regulates its dynamics and chitin synthesis during cytokinesis	-0.165522	-0.0666853	0.141171	-0.311752	-0.0711594	0.0782794	0.227499	0.170095	0.00262279	-0.00120351	0.0679627	0.864326	0.968218	0.988601	0.485442	0.899374	0.819779	0.900989	0.836352	0.963142	0.917769	0.930142	0
GACGTTTCCTGGGGTACTAA	+	chrII	314295	314317	S802F	NA	NA	-5.29	5.29	TRUE	eProvs	YBR038W	CHS2	Chitin synthase II; catalyzes transfer of N-acetylglucosamine (GlcNAc) to chitin upon activation of zymogenic form; required for chitin synthesis in the primary septum during cytokinesis; localization regulated by Cdk1p during mitosis; phosphorylation by Dbf2p kinase regulates its dynamics and chitin synthesis during cytokinesis	-0.277709	-0.219554	NA	-0.415629	-0.187783	0.115285	-0.160242	-0.48292	-0.80095	-0.522687	NA	0.878257	0.9567	NA	0.759422	0.899374	0.845907	0.991605	0.804604	0.5954	0.874905	NA	0
GGATTCAAATGTGGCTGGTG	+	chrII	313277	313299	S462L	NA	NA	-5.967	5.967	TRUE	eProvs	YBR038W	CHS2	Chitin synthase II; catalyzes transfer of N-acetylglucosamine (GlcNAc) to chitin upon activation of zymogenic form; required for chitin synthesis in the primary septum during cytokinesis; localization regulated by Cdk1p during mitosis; phosphorylation by Dbf2p kinase regulates its dynamics and chitin synthesis during cytokinesis	NA	NA	NA	NA	-0.492392	NA	NA	NA	NA	NA	NA	NA	NA	NA	NA	0.872532	NA	NA	NA	NA	NA	NA	0
GTCTCCCAAAAGAGCAGGCG	+	chrII	312194	312216	P101F	NA	NA	-7.656	7.656	TRUE	eProvs	YBR038W	CHS2	Chitin synthase II; catalyzes transfer of N-acetylglucosamine (GlcNAc) to chitin upon activation of zymogenic form; required for chitin synthesis in the primary septum during cytokinesis; localization regulated by Cdk1p during mitosis; phosphorylation by Dbf2p kinase regulates its dynamics and chitin synthesis during cytokinesis	-0.0670588	-0.248295	0.0930344	-0.0825179	-0.206414	-0.0729917	0.367343	0.0526764	0.275385	0.0457933	-0.0242813	0.929824	0.893284	0.995054	0.870434	0.898896	0.83647	0.855798	0.892371	0.90261	0.903529	0.951737	0
TAACCAAAAACACTTTCTAA	-	chrII	313404	313426	G509N	NA	NA	-6	6	TRUE	eProvs	YBR038W	CHS2	Chitin synthase II; catalyzes transfer of N-acetylglucosamine (GlcNAc) to chitin upon activation of zymogenic form; required for chitin synthesis in the primary septum during cytokinesis; localization regulated by Cdk1p during mitosis; phosphorylation by Dbf2p kinase regulates its dynamics and chitin synthesis during cytokinesis	0.152376	0.493277	0.629242	0.0914443	-0.309254	-0.0554809	-0.234885	0.897877	0.475942	-0.023755	-0.189549	0.910851	0.854169	0.802356	0.865227	0.866239	0.851928	0.944036	0.367303	0.779305	0.903529	0.898132	0
TTATTTCTCAAAGAAGACGT	+	chrII	313690	313712	S600F	NA	NA	-5.658	5.658	TRUE	eProvs	YBR038W	CHS2	Chitin synthase II; catalyzes transfer of N-acetylglucosamine (GlcNAc) to chitin upon activation of zymogenic form; required for chitin synthesis in the primary septum during cytokinesis; localization regulated by Cdk1p during mitosis; phosphorylation by Dbf2p kinase regulates its dynamics and chitin synthesis during cytokinesis	-0.332237	-0.0943198	-0.10497	0.291949	0.148138	-0.210974	-0.154512	0.2038	-0.361257	-0.526517	0.192372	0.707416	0.969918	0.990002	0.616999	0.899374	0.716511	0.968105	0.846141	0.866017	0.615425	0.870476	0
TATTACTGGTGCTTCCTCTT	+	chrII	316483	316505	T305I	NA	NA	-5.971	5.971	FALSE	neProvs	YBR039W	ATP3	Gamma subunit of the F1 sector of mitochondrial F1F0 ATP synthase; F1F0 ATP synthase is a large, evolutionarily conserved enzyme complex required for ATP synthesis	-0.318057	0.1041	-0.11591	-0.199348	-0.214868	0.0271999	0.214516	-0.0781272	0.0302738	0.168665	0.0387417	0.808403	0.971991	0.990002	0.807039	0.892173	0.862246	0.941831	0.891371	0.95979	0.901092	0.949399	0
CGTTCAGGCCGGTGACTACG	+	chrII	318664	318686	Q135*	NA	NA	NA	NA	FALSE	neStops	YBR041W	FAT1	Very long chain fatty acyl-CoA synthetase and fatty acid transporter; activates imported fatty acids with a preference for very long lengths (C20-C26); has a separate function in the transport of long chain fatty acids	0.285266	0.174285	-0.176656	-0.430952	0.38125	0.300752	0.148501	-0.0999784	0.0981207	0.395614	0.226026	0.808403	0.936122	0.988598	0.429896	0.652905	0.545875	0.970385	0.88281	0.944549	0.868074	0.794529	0
TCTTACAACAAGACAACGTT	+	chrII	318966	318988	Q236*	NA	NA	NA	NA	FALSE	neStops	YBR041W	FAT1	Very long chain fatty acyl-CoA synthetase and fatty acid transporter; activates imported fatty acids with a preference for very long lengths (C20-C26); has a separate function in the transport of long chain fatty acids	-0.0520521	0.12607	-0.175829	0.0409869	-0.408096	0.682285	-0.133768	-0.235676	0.309964	-0.199184	0.286682	0.933108	0.957671	0.988601	0.892952	0.873018	0.105785	0.977783	0.862796	0.880365	0.901092	0.828775	0
AACCAAATTATTGTTAGAGT	+	chrII	320447	320469	W387*	NA	NA	NA	NA	FALSE	neStops	YBR042C	CST26	Acyltransferase; enzyme mainly responsible for the introduction of saturated very long chain fatty acids into neo-synthesized molecules of phosphatidylinositol; required for incorporation of stearic acid into phosphatidylinositol; affects chromosome stability when overexpressed; CST26 has a paralog, YDR018C, that arose from the whole genome duplication	-0.3001	0.0541925	-0.264934	-0.0101249	0.0341593	NA	-0.67576	0.0739429	NA	-0.0312455	0.356861	0.877896	0.977646	0.988601	0.895241	0.9137	NA	0.76904	0.892341	NA	0.903529	0.828775	0
ACCGAAACCGAGGATAGGAA	+	chrII	321157	321179	G149D	NA	NA	-6.61	6.61	FALSE	neProvs	YBR042C	CST26	Acyltransferase; enzyme mainly responsible for the introduction of saturated very long chain fatty acids into neo-synthesized molecules of phosphatidylinositol; required for incorporation of stearic acid into phosphatidylinositol; affects chromosome stability when overexpressed; CST26 has a paralog, YDR018C, that arose from the whole genome duplication	0.17994	-0.189845	0.141783	-0.135293	-0.0545505	-0.197163	0.323741	0.0564739	-0.166302	0.00302854	-0.240199	0.867318	0.907928	0.990002	0.810064	0.899374	0.703408	0.814465	0.891935	0.927536	0.915012	0.807943	0
GTCACCTGAGCGCATAACTG	-	chrII	321015	321037	P193F	NA	NA	-7.561	7.561	FALSE	neProvs	YBR042C	CST26	Acyltransferase; enzyme mainly responsible for the introduction of saturated very long chain fatty acids into neo-synthesized molecules of phosphatidylinositol; required for incorporation of stearic acid into phosphatidylinositol; affects chromosome stability when overexpressed; CST26 has a paralog, YDR018C, that arose from the whole genome duplication	0.060637	0.0446722	-0.237383	0.153435	-0.0253731	0.0443596	0.0795213	0.19136	0.0666471	-0.241432	-0.246807	0.923785	0.971991	0.983555	0.809668	0.9137	0.853071	0.98997	0.845568	0.957361	0.901092	0.763713	0
GTTCGAAAAGTCGTCGTCCC	-	chrII	321560	321582	R11*	NA	NA	NA	NA	FALSE	neStops	YBR042C	CST26	Acyltransferase; enzyme mainly responsible for the introduction of saturated very long chain fatty acids into neo-synthesized molecules of phosphatidylinositol; required for incorporation of stearic acid into phosphatidylinositol; affects chromosome stability when overexpressed; CST26 has a paralog, YDR018C, that arose from the whole genome duplication	0.319651	NA	-0.342097	-0.241641	-0.141898	-0.148005	-0.148473	0.361842	0.16396	0.464029	-0.34307	0.850929	NA	0.983555	0.812302	0.899374	0.806539	0.989323	0.842867	0.942567	0.88859	0.836021	0
TACCAACTCTAACAATAATT	-	chrII	320449	320471	P381L	T382I	NA	c(-7.572, 1.635)	7.572	FALSE	neProvs	YBR042C	CST26	Acyltransferase; enzyme mainly responsible for the introduction of saturated very long chain fatty acids into neo-synthesized molecules of phosphatidylinositol; required for incorporation of stearic acid into phosphatidylinositol; affects chromosome stability when overexpressed; CST26 has a paralog, YDR018C, that arose from the whole genome duplication	-0.222122	0.0329194	0.0388012	-0.292488	0.170387	-0.114193	-0.124245	-0.266983	0.236045	-0.575745	-0.186316	0.877896	0.980103	0.997755	0.777929	0.899374	0.824839	0.986028	0.849158	0.932346	0.874483	0.898132	0
AAACCATTGAGTGGATCTCC	+	chrII	323145	323167	W266*	NA	NA	NA	NA	FALSE	neStops	YBR043C	QDR3	Multidrug transporter of the major facilitator superfamily; member of the 12-spanner drug:H(+) antiporter DHA1 family; has a role in polyamine homeostasis; involved in spore wall asembly; sequence similarity to DTR1 and QDR1, and the triple mutant dtr1 qdr1 qdr3 exhibits reduced dityrosine fluorescence relative to the single mutants; expression is upregulated under polyamine stress; required for …	0.124203	-0.458632	-0.255482	0.397625	0.274516	0.277473	-0.0286418	-0.135439	-0.202327	-0.0241138	-0.204708	0.911455	0.787152	0.983555	0.634035	0.875152	0.660623	0.999797	0.877351	0.932346	0.903529	0.875786	0
ACACCCATGTTAAACGGTAT	-	chrII	322009	322031	P640F	NA	NA	-10.284	10.284	FALSE	neProvs	YBR043C	QDR3	Multidrug transporter of the major facilitator superfamily; member of the 12-spanner drug:H(+) antiporter DHA1 family; has a role in polyamine homeostasis; involved in spore wall asembly; sequence similarity to DTR1 and QDR1, and the triple mutant dtr1 qdr1 qdr3 exhibits reduced dityrosine fluorescence relative to the single mutants; expression is upregulated under polyamine stress; required for …	0.211916	-0.0500286	-0.377082	0.069228	0.0440578	-0.0131246	0.242261	-0.0165649	-0.0163996	0.0398122	0.0610287	0.783698	0.971991	0.690276	0.850768	0.899374	0.863989	0.819557	0.900885	0.960122	0.901092	0.933426	0
AGTGTTCAAAGTGTAGGTGC	-	chrII	323290	323312	Q214*	NA	NA	NA	NA	FALSE	neStops	YBR043C	QDR3	Multidrug transporter of the major facilitator superfamily; member of the 12-spanner drug:H(+) antiporter DHA1 family; has a role in polyamine homeostasis; involved in spore wall asembly; sequence similarity to DTR1 and QDR1, and the triple mutant dtr1 qdr1 qdr3 exhibits reduced dityrosine fluorescence relative to the single mutants; expression is upregulated under polyamine stress; required for …	NA	0.229628	NA	NA	NA	NA	NA	-0.113736	NA	NA	-0.0998041	NA	0.9567	NA	NA	NA	NA	NA	0.891371	NA	NA	0.94001	0
ATACAAGAAGATTATCAGAG	-	chrII	322981	323003	Q316*	NA	NA	NA	NA	FALSE	neStops	YBR043C	QDR3	Multidrug transporter of the major facilitator superfamily; member of the 12-spanner drug:H(+) antiporter DHA1 family; has a role in polyamine homeostasis; involved in spore wall asembly; sequence similarity to DTR1 and QDR1, and the triple mutant dtr1 qdr1 qdr3 exhibits reduced dityrosine fluorescence relative to the single mutants; expression is upregulated under polyamine stress; required for …	NA	0.376799	0.00670233	0.45947	0.436201	0.168005	0.100122	0.539988	-0.0817685	0.0443746	0.44729	NA	0.85085	0.9985	0.600932	0.812483	0.78224	0.995851	0.75658	0.957553	0.903529	0.694437	0
CACACCCATGTTAAACGGTA	-	chrII	322010	322032	P640F	NA	NA	-10.284	10.284	FALSE	neProvs	YBR043C	QDR3	Multidrug transporter of the major facilitator superfamily; member of the 12-spanner drug:H(+) antiporter DHA1 family; has a role in polyamine homeostasis; involved in spore wall asembly; sequence similarity to DTR1 and QDR1, and the triple mutant dtr1 qdr1 qdr3 exhibits reduced dityrosine fluorescence relative to the single mutants; expression is upregulated under polyamine stress; required for …	0.0884191	0.0698146	0.0560426	-0.127852	-0.122407	-0.0323076	0.198944	0.00306191	0.0126042	0.101893	-0.113562	0.910851	0.962103	0.995762	0.801822	0.899374	0.852193	0.912288	0.907462	0.961765	0.901092	0.904833	0
CCTCAATTTACGGTGGACGT	-	chrII	322344	322366	S528L	NA	NA	-5.4	5.4	FALSE	neProvs	YBR043C	QDR3	Multidrug transporter of the major facilitator superfamily; member of the 12-spanner drug:H(+) antiporter DHA1 family; has a role in polyamine homeostasis; involved in spore wall asembly; sequence similarity to DTR1 and QDR1, and the triple mutant dtr1 qdr1 qdr3 exhibits reduced dityrosine fluorescence relative to the single mutants; expression is upregulated under polyamine stress; required for …	0.139399	0.0927521	0.10217	-0.119808	-0.199329	0.0459713	0.208696	0.00263195	-0.0380838	0.465753	-0.231515	0.877896	0.9567	0.988601	0.830449	0.875057	0.847756	0.897569	0.907462	0.958437	0.551294	0.771526	0
CTAAACAGGTATCAGCGGTG	-	chrII	322593	322615	Q446*	NA	NA	NA	NA	FALSE	neStops	YBR043C	QDR3	Multidrug transporter of the major facilitator superfamily; member of the 12-spanner drug:H(+) antiporter DHA1 family; has a role in polyamine homeostasis; involved in spore wall asembly; sequence similarity to DTR1 and QDR1, and the triple mutant dtr1 qdr1 qdr3 exhibits reduced dityrosine fluorescence relative to the single mutants; expression is upregulated under polyamine stress; required for …	0.22977	0.70191	-0.188823	0.159925	NA	-0.331057	-0.0824697	NA	NA	NA	-0.0907266	0.90167	0.785328	0.990002	0.844026	NA	0.645325	0.999238	NA	NA	NA	0.936086	0
GCCTCAACTCGCCATTATAC	-	chrII	323666	323688	Q88*	L89F	NA	c(NA, -2.228)	2.228	FALSE	neStops	YBR043C	QDR3	Multidrug transporter of the major facilitator superfamily; member of the 12-spanner drug:H(+) antiporter DHA1 family; has a role in polyamine homeostasis; involved in spore wall asembly; sequence similarity to DTR1 and QDR1, and the triple mutant dtr1 qdr1 qdr3 exhibits reduced dityrosine fluorescence relative to the single mutants; expression is upregulated under polyamine stress; required for …	0.0955544	0.0226283	0.0281785	0.298127	-0.1686	0.223724	0.0383108	0.115188	0.213835	0.153084	0.176095	0.912924	0.980084	0.997312	0.555269	0.884211	0.642468	0.999238	0.8683	0.915604	0.901092	0.86136	0
GTTCCCATACCGTTTAACAT	+	chrII	322006	322028	M645I	G646K	NA	c(-1.228, -6.655)	6.655	FALSE	neProvs	YBR043C	QDR3	Multidrug transporter of the major facilitator superfamily; member of the 12-spanner drug:H(+) antiporter DHA1 family; has a role in polyamine homeostasis; involved in spore wall asembly; sequence similarity to DTR1 and QDR1, and the triple mutant dtr1 qdr1 qdr3 exhibits reduced dityrosine fluorescence relative to the single mutants; expression is upregulated under polyamine stress; required for …	-0.0289608	-0.0449165	0.131352	-0.272334	-0.390168	-0.184054	0.230572	0.0284673	-0.16355	-0.0453569	0.195842	0.934906	0.973496	0.988601	0.650219	0.56798	0.693857	0.912947	0.89941	0.930165	0.901092	0.87395	0
CAGGCCTCGAAAGCTGGGGA	-	chrII	325732	325754	P104F	R105*	NA	c(-1.156, NA)	1.156	FALSE	neStops	YBR044C	TCM62	Protein involved in assembly of the succinate dehydrogenase complex; mitochondrial; putative chaperone	0.115593	-0.104014	0.286258	-0.167063	0.027459	0.0423419	-0.171659	-0.00020933	0.138174	0.16666	-0.341232	0.917143	0.963212	0.983555	0.815408	0.9137	0.857647	0.965051	0.908159	0.937088	0.901092	0.637628	0
CTTGGAGCCATGGAGCAAAA	-	chrII	324442	324464	P535S	NA	NA	-7.933	7.933	FALSE	neProvs	YBR044C	TCM62	Protein involved in assembly of the succinate dehydrogenase complex; mitochondrial; putative chaperone	-0.0495698	0.0524327	-0.134282	0.0370272	-0.265643	0.047115	-0.369562	0.00469716	-0.257419	-0.124136	0.0227189	0.927181	0.971991	0.988601	0.882396	0.819629	0.845907	0.658688	0.907462	0.848263	0.901092	0.950676	0
TAGGAGCCAAAATTCCGAGA	-	chrII	329579	329601	Q167*	NA	NA	NA	NA	FALSE	neStops	YBR045C	GIP1	Meiosis-specific regulatory subunit of the Glc7p protein phosphatase; regulates spore wall formation and septin organization, required for expression of some late meiotic genes and for normal localization of Glc7p	0.353587	0.00329127	-0.169326	0.368952	0.265702	NA	-0.518547	0.180736	-0.314144	-0.0223638	NA	0.832155	0.980591	0.990002	0.756019	0.891921	NA	0.82016	0.879376	0.926286	0.903529	NA	0
AAGACCAGATGCATTACCAA	+	chrII	330756	330778	G251N	NA	NA	-5.991	5.991	FALSE	neProvs	YBR046C	ZTA1	NADPH-dependent quinone reductase; GFP-tagged protein localizes to the cytoplasm and nucleus; has similarity to E. coli quinone oxidoreductase and to human zeta-crystallin	-0.0342114	0.013208	-0.12407	0.0847293	0.248267	0.170364	-0.202875	-0.0473504	0.0553911	0.501938	0.0360804	0.934776	0.980114	0.990002	0.875021	0.897754	0.761773	0.962965	0.897359	0.957597	0.799153	0.951002	0
CAATCCCACACCACCCGCTG	+	chrII	331023	331045	G162K	NA	NA	-8	8	FALSE	neProvs	YBR046C	ZTA1	NADPH-dependent quinone reductase; GFP-tagged protein localizes to the cytoplasm and nucleus; has similarity to E. coli quinone oxidoreductase and to human zeta-crystallin	0.0522398	0.0100108	0.18783	0.0277856	0.376004	0.117209	0.0276195	0.168086	-0.148298	-0.277117	-0.0500108	0.919568	0.980103	0.983555	0.882811	0.181484	0.743433	0.999238	0.834334	0.907532	0.838313	0.936086	0
TCCTGTACCATCGATTTCGG	-	chrII	331406	331428	P31S	NA	NA	-7.942	7.942	FALSE	neProvs	YBR046C	ZTA1	NADPH-dependent quinone reductase; GFP-tagged protein localizes to the cytoplasm and nucleus; has similarity to E. coli quinone oxidoreductase and to human zeta-crystallin	0.0764509	0.0328633	0.0317489	0.109279	-0.0688271	0.357739	0.0514263	-0.20891	-0.115876	-0.0750909	-0.315672	0.918539	0.977007	0.995866	0.835383	0.899374	0.292282	0.997292	0.817971	0.936357	0.901092	0.536762	0
AACCTTCAATAGCGGTCTTT	-	chrII	333473	333495	E50K	G51S	NA	c(-2.53, -5.693)	5.693	FALSE	neProvs	YBR048W	RPS11B	Protein component of the small (40S) ribosomal subunit; homologous to mammalian ribosomal protein S11 and bacterial S17; RPS11B has a paralog, RPS11A, that arose from the whole genome duplication	-0.318556	0.319216	-0.0577609	0.321869	-0.0331538	0.103018	0.0833025	-0.339745	-0.0708977	0.194396	0.0321018	0.678911	0.85085	0.995762	0.581573	0.9137	0.808291	0.98997	0.750612	0.955023	0.901092	0.948915	0
AACCCATTTAATTTCATGCC	+	chrII	334516	334538	G767K	NA	NA	-6.714	6.714	TRUE	eProvs	YBR049C	REB1	RNA polymerase I enhancer binding protein; DNA binding protein that binds to genes transcribed by both RNA polymerase I and RNA polymerase II; required for termination of RNA polymerase I transcription; Reb1p bound to DNA acts to block RNA polymerase II readthrough transcription	0.0835386	-0.00519567	-0.204793	-0.0190426	-0.251361	-0.13622	-0.207129	-0.490545	-0.345663	0.506532	0.467954	0.9186	0.980348	0.988601	0.892952	0.882045	0.801331	0.947113	0.677322	0.891943	0.787886	0.566507	0
AAGCCTGGCATGAAATTAAA	-	chrII	334519	334541	P761F	NA	NA	-8.79	8.79	TRUE	eProvs	YBR049C	REB1	RNA polymerase I enhancer binding protein; DNA binding protein that binds to genes transcribed by both RNA polymerase I and RNA polymerase II; required for termination of RNA polymerase I transcription; Reb1p bound to DNA acts to block RNA polymerase II readthrough transcription	-0.14538	-0.0441089	0.0790415	0.297109	-0.0105761	-0.204095	-0.212197	-0.416924	0.305642	0.151542	0.35168	0.887075	0.973678	0.995762	0.540726	0.917337	0.625229	0.938944	0.672706	0.851848	0.901092	0.521102	0
AGATCCGGAATTAACCACCT	-	chrII	336122	336144	P227L	NA	NA	-9.175	9.175	TRUE	eProvs	YBR049C	REB1	RNA polymerase I enhancer binding protein; DNA binding protein that binds to genes transcribed by both RNA polymerase I and RNA polymerase II; required for termination of RNA polymerase I transcription; Reb1p bound to DNA acts to block RNA polymerase II readthrough transcription	-1.26778	0.148742	0.539629	-0.620799	-1.09965	-1.03858	-0.348612	-1.1247	-1.29474	-1.29332	-2.38887	9.47412e-08	0.936122	0.238596	0.0637466	5.04664e-05	0.000134977	0.814465	0.000390687	1.82269e-06	4.13466e-06	5.88594e-26	7
CAGAATGCCAGAAGATTGTA	-	chrII	335282	335304	P508S	NA	NA	-7.99	7.99	TRUE	eProvs	YBR049C	REB1	RNA polymerase I enhancer binding protein; DNA binding protein that binds to genes transcribed by both RNA polymerase I and RNA polymerase II; required for termination of RNA polymerase I transcription; Reb1p bound to DNA acts to block RNA polymerase II readthrough transcription	0.174738	-0.388477	-0.189027	0.0279265	0.168665	-0.128992	-0.18351	-0.315347	0.0738465	0.296458	0.0994163	0.87312	0.74336	0.986305	0.892952	0.897754	0.755568	0.927395	0.765638	0.951998	0.901092	0.921782	0
TAAACCAGCTTCTCCAAAAA	+	chrII	337743	337765	W151*	NA	NA	NA	NA	FALSE	neStops	YBR050C	REG2	Regulatory subunit of the Glc7p type-1 protein phosphatase; involved with Reg1p, Glc7p, and Snf1p in regulation of glucose-repressible genes, also involved in glucose-induced proteolysis of maltose permease; REG2 has a paralog, REG1, that arose from the whole genome duplication	0.116998	0.167785	0.311273	-0.394282	-0.0335427	-0.11712	-0.0441802	-0.163357	0.274783	-0.171721	0.28269	0.911361	0.936122	0.942378	0.523957	0.9137	0.79663	0.999238	0.862025	0.899319	0.901092	0.745279	0
AACCAGATGGAAGTGCAATT	-	chrII	339978	340000	P252L	NA	NA	-10	10	FALSE	neProvs	YBR053C	YBR053C	Putative protein of unknown function; induced by cell wall perturbation	-0.399195	0.0394779	-0.208534	-0.260448	-0.18947	0.18704	0.318798	-0.0272052	0.0503018	0.0243182	-0.16152	0.682169	0.977007	0.986305	0.675519	0.897754	0.745307	0.895996	0.901204	0.958403	0.903529	0.898132	0
AATTCCTAACGCGATCCACT	-	chrII	340139	340161	P199F	NA	NA	-9.9	9.9	FALSE	neProvs	YBR053C	YBR053C	Putative protein of unknown function; induced by cell wall perturbation	-0.0178342	-0.200359	0.160215	0.13327	-0.0941154	-0.00364512	0.114555	0.122469	-0.0228471	0.0384299	0.102246	0.937585	0.88815	0.986305	0.778557	0.899374	0.870662	0.95696	0.863129	0.959677	0.901692	0.901287	0
ATCAACCCACAACAGTGTAC	+	chrII	340623	340645	W41*	V42I	NA	c(NA, -0.43)	0.43	FALSE	neStops	YBR053C	YBR053C	Putative protein of unknown function; induced by cell wall perturbation	0.127809	0.0476067	-0.22465	0.173187	0.100787	0.208327	0.0305685	0.0485193	-0.387621	-0.0925193	0.194681	0.907108	0.971991	0.983555	0.7914	0.899374	0.688828	0.999238	0.892341	0.674107	0.901092	0.87395	0
TAATTCCTAACGCGATCCAC	-	chrII	340140	340162	P199F	NA	NA	-9.9	9.9	FALSE	neProvs	YBR053C	YBR053C	Putative protein of unknown function; induced by cell wall perturbation	-0.253981	0.000921016	0.0654529	-0.0145236	-0.131257	-0.146326	0.217583	-0.120885	0.0448079	-0.180599	0.0825766	0.708085	0.980591	0.99134	0.892952	0.891921	0.672997	0.829604	0.853439	0.957553	0.901092	0.921782	0
AACCCCATTTGTAAGTAGAG	-	chrII	343586	343608	W168*	G169S	NA	c(NA, -6)	6	FALSE	neStops	YBR054W	YRO2	Protein with a putative role in response to acid stress; null mutant is sensitive to acetic acid; transcription is regulated by Haa1p and induced in the presence of acetic acid; protein observed in plasma membrane foci in the presence of acetic acid; the authentic, non-tagged protein is detected in a phosphorylated state in highly purified mitochondria in high-throughput studies	-0.261658	-0.245211	-0.0979059	0.0571591	-0.218642	0.321069	0.132994	-0.275068	0.0905563	0.082522	-0.276055	0.877896	0.939233	0.995762	0.886998	0.899374	0.712963	0.98997	0.859918	0.958149	0.903529	0.87395	0
CTGAACCACGAGATGTAATG	-	chrII	343178	343200	G32N	NA	NA	-5.974	5.974	FALSE	neProvs	YBR054W	YRO2	Protein with a putative role in response to acid stress; null mutant is sensitive to acetic acid; transcription is regulated by Haa1p and induced in the presence of acetic acid; protein observed in plasma membrane foci in the presence of acetic acid; the authentic, non-tagged protein is detected in a phosphorylated state in highly purified mitochondria in high-throughput studies	0.241929	0.156402	0.118774	-0.199694	0.0978961	-0.246154	0.0439081	-0.132015	-0.108205	-0.248307	-0.145646	0.84142	0.936975	0.990002	0.78386	0.899374	0.714156	0.999238	0.874888	0.940889	0.895766	0.898132	0
TGTACAAACTTCTACCCAAA	+	chrII	343391	343413	Q99*	NA	NA	NA	NA	FALSE	neStops	YBR054W	YRO2	Protein with a putative role in response to acid stress; null mutant is sensitive to acetic acid; transcription is regulated by Haa1p and induced in the presence of acetic acid; protein observed in plasma membrane foci in the presence of acetic acid; the authentic, non-tagged protein is detected in a phosphorylated state in highly purified mitochondria in high-throughput studies	-0.210015	-0.171603	0.14222	-0.0333522	0.343034	0.286324	0.152059	-0.042438	-0.360595	-0.297592	0.176451	0.907801	0.9567	0.990002	0.892952	0.863138	0.677143	0.983717	0.899491	0.922535	0.901092	0.921782	0
AGCCTACTTACGGACCCGAA	-	chrII	344680	344702	P868L	T869I	NA	c(-8.925, -1.512)	8.925	TRUE	eProvs	YBR055C	PRP6	Splicing factor; component of the U4/U6-U5 snRNP complex	0.020921	0.0210155	0.354379	-0.135954	-0.0689604	0.0469409	-0.359719	0.0102711	0.00671124	-0.166435	-0.107744	0.939207	0.980103	0.916707	0.827171	0.899374	0.845907	0.811508	0.907124	0.962971	0.901092	0.921782	0
ATCCAACAAATCCACAGGGT	-	chrII	346570	346592	P238L	T239I	NA	c(-9.4, -2.567)	9.4	TRUE	eProvs	YBR055C	PRP6	Splicing factor; component of the U4/U6-U5 snRNP complex	0.272909	0.143076	0.159584	0.438012	0.359811	0.290107	0.495222	0.371001	-0.246004	0.232648	0.158043	0.850929	0.9567	0.990002	0.437388	0.863138	0.642418	0.706995	0.821922	0.924672	0.901092	0.913566	0
CCACCTGCAGGTTACGTACC	-	chrII	347249	347271	P12F	A13V	NA	c(-11, -0.856)	11	TRUE	eProvs	YBR055C	PRP6	Splicing factor; component of the U4/U6-U5 snRNP complex	-0.59992	-0.21544	0.20402	0.251889	-0.0578396	-0.129669	0.179126	-0.271009	0.222423	0.327528	-0.00203172	0.159076	0.907928	0.983555	0.677533	0.899374	0.781815	0.94733	0.805455	0.897594	0.865767	0.953669	0
GCACCGGATTCGCTAATACC	-	chrII	346838	346860	P149L	NA	NA	-10	10	TRUE	eProvs	YBR055C	PRP6	Splicing factor; component of the U4/U6-U5 snRNP complex	0.294596	0.540199	-0.490071	-0.0632988	0.23629	0.24083	0.320857	-0.327743	0.371273	-0.316822	-0.13606	0.790426	0.690567	0.796467	0.877156	0.896987	0.668758	0.905916	0.79056	0.856928	0.885443	0.921782	0
TGCCCAATTGCCCTTTATTA	-	chrII	345187	345209	P699L	NA	NA	-8.356	8.356	TRUE	eProvs	YBR055C	PRP6	Splicing factor; component of the U4/U6-U5 snRNP complex	0.0829067	-0.024172	-0.0539798	0.161266	-0.106398	0.0681691	-0.225575	0.264123	-0.15539	0.27203	0.115563	0.918539	0.980103	0.995762	0.82883	0.899374	0.839166	0.946389	0.804604	0.932346	0.901092	0.918541	0
TTCCAAGCAATGCTTTACTT	-	chrII	344980	345002	P768L	NA	NA	-8.153	8.153	TRUE	eProvs	YBR055C	PRP6	Splicing factor; component of the U4/U6-U5 snRNP complex	-0.108992	0.283157	0.189518	0.354591	-0.0601031	0.0164575	-0.368379	0.245694	-0.0605353	0.236428	0.0958334	0.907483	0.838035	0.983555	0.318545	0.899374	0.863301	0.76704	0.799818	0.95177	0.901092	0.921782	0
AAATTTCCTTTCTGCATCAT	-	chrII	349052	349074	G397K	NA	NA	-6.314	6.314	FALSE	neProvs	YBR056W	YBR056W	Putative glycoside hydrolase of the mitochondrial intermembrane space	0.0883638	-0.41681	0.00491248	0.0834417	-0.0594575	-0.246887	-0.277655	-0.152298	-0.16635	-0.0270623	0.29868	0.911485	0.54119	0.9985	0.847553	0.899374	0.570596	0.855798	0.853439	0.921463	0.903529	0.624614	0
CAAACTTGGAATAAAACTTC	+	chrII	348899	348921	T342I	NA	NA	-5.019	5.019	FALSE	neProvs	YBR056W	YBR056W	Putative glycoside hydrolase of the mitochondrial intermembrane space	-0.0563692	0.0613704	0.00520334	-0.0549596	0.252481	0.0914572	0.0558006	-0.36644	0.311992	0.42895	-0.151897	0.93228	0.971991	0.9985	0.882396	0.875057	0.822004	0.999238	0.756619	0.866017	0.853648	0.898132	0
TTAGCTCCCATGATGCAGAA	+	chrII	349046	349068	A391V	P392F	NA	c(1.926, -10.307)	10.307	FALSE	neProvs	YBR056W	YBR056W	Putative glycoside hydrolase of the mitochondrial intermembrane space	-0.0474602	-0.219626	-0.181306	-0.0431119	0.0711915	0.0233817	-0.0409412	0.149504	0.25551	-0.119137	-0.0179542	0.931604	0.912113	0.986573	0.882585	0.899374	0.861865	0.999238	0.866674	0.878268	0.901092	0.95205	0
TTGCAGTTTGAATACGGTGA	+	chrII	349010	349032	Q379*	NA	NA	NA	NA	FALSE	neStops	YBR056W	YBR056W	Putative glycoside hydrolase of the mitochondrial intermembrane space	NA	NA	-0.763707	NA	-0.180678	NA	-0.295489	0.497102	NA	NA	0.400255	NA	NA	0.847835	NA	0.899374	NA	0.968105	0.790867	NA	NA	0.828775	0
GACCCAAATTGAACTGCAGT	-	chrII	352288	352310	Q330*	NA	NA	NA	NA	FALSE	neStops	YBR057C	MUM2	Protein essential for meiotic DNA replication and sporulation; cytoplasmic protein; subunit of the MIS complex which controls mRNA methylation during during the induction of sporulation; also interacts with Orc2p, which is a component of the origin recognition complex	-0.026813	-0.332191	-0.331774	0.489657	-0.237026	-0.272797	-0.143813	-0.561804	0.0843462	-0.112611	0.108537	0.939576	0.903256	0.983555	0.487177	0.885221	0.660981	0.981837	0.683732	0.955428	0.901092	0.936086	0
GATACCATTTGGATATAGTT	+	chrII	354845	354867	G390N	NA	NA	-5.9	5.9	FALSE	neProvs	YBR058C	UBP14	Ubiquitin-specific protease; specifically disassembles unanchored ubiquitin chains; involved in fructose-1,6-bisphosphatase (Fbp1p) degradation; similar to human isopeptidase T	0.0769735	0.00520797	-0.0304599	-0.406118	0.152591	-0.0761502	-0.0315717	-0.0308887	0.194973	0.275009	-0.178077	0.918585	0.980348	0.998018	0.424997	0.897754	0.826891	0.999238	0.899491	0.921009	0.885355	0.876579	0
GGCTATACAGATTCCCTTAG	-	chrII	354589	354611	Q472*	NA	NA	NA	NA	FALSE	neStops	YBR058C	UBP14	Ubiquitin-specific protease; specifically disassembles unanchored ubiquitin chains; involved in fructose-1,6-bisphosphatase (Fbp1p) degradation; similar to human isopeptidase T	-0.286922	-0.00515476	-0.0800837	0.153988	-0.325887	-0.206907	0.288602	-0.336405	0.0333204	-0.284951	-0.351077	0.877896	0.980348	0.995762	0.844026	0.863138	0.743553	0.934592	0.803034	0.959711	0.901092	0.760646	0
TTTACCAGGTTTAATAGACA	-	chrII	354361	354383	P547L	NA	NA	-8.533	8.533	FALSE	neProvs	YBR058C	UBP14	Ubiquitin-specific protease; specifically disassembles unanchored ubiquitin chains; involved in fructose-1,6-bisphosphatase (Fbp1p) degradation; similar to human isopeptidase T	0.251672	-0.318219	0.159534	-0.0902676	0.146626	0.360466	0.424382	-0.406885	0.00417252	-0.281241	0.109394	0.832155	0.833563	0.988598	0.851342	0.899374	0.403989	0.76904	0.75658	0.963142	0.901092	0.923818	0
AACGCCTCTCGCCGTCGTGA	-	chrII	359826	359848	A115V	S116F	NA	c(-4, -5.267)	5.267	FALSE	neProvs	YBR059C	AKL1	Ser-Thr protein kinase; member (with Ark1p and Prk1p) of the Ark kinase family; involved in endocytosis and actin cytoskeleton organization	0.0154768	0.053057	0.317323	0.0616618	0.225198	-0.162291	0.263144	-0.0923882	0.119117	-0.300351	-0.249509	0.939576	0.971991	0.983555	0.879883	0.879864	0.748982	0.912288	0.880358	0.937088	0.885443	0.80662	0
CAACAACAGGACCAACCCAA	-	chrII	358293	358315	Q626*	Q627*	NA	c(NA, NA)	NA	FALSE	neStops	YBR059C	AKL1	Ser-Thr protein kinase; member (with Ark1p and Prk1p) of the Ark kinase family; involved in endocytosis and actin cytoskeleton organization	0.495589	NA	0.2031	-0.43541	0.336622	0.425395	-0.00880246	0.773404	NA	0.252158	-0.607916	0.850929	NA	0.990002	0.651195	0.891921	0.64959	0.999797	0.724069	NA	0.901092	0.548831	0
CTTCCCATGAACGCTAGTGA	-	chrII	358995	359017	P392F	NA	NA	-8.65	8.65	FALSE	neProvs	YBR059C	AKL1	Ser-Thr protein kinase; member (with Ark1p and Prk1p) of the Ark kinase family; involved in endocytosis and actin cytoskeleton organization	0.146347	-0.0475809	-0.060715	-0.113527	-0.209029	0.117998	0.076643	-0.110647	-0.100957	0.296008	-0.284	0.854459	0.971991	0.990157	0.810064	0.859861	0.745307	0.983717	0.864976	0.937088	0.82792	0.527132	0
GGCCCGTCAATCGCTTGATT	-	chrII	356962	356984	R1070C	Q1071*	NA	c(-5.939, NA)	5.939	FALSE	neStops	YBR059C	AKL1	Ser-Thr protein kinase; member (with Ark1p and Prk1p) of the Ark kinase family; involved in endocytosis and actin cytoskeleton organization	-0.240928	0.279674	0.0875251	-0.477168	0.0965647	-0.0212972	-0.00816813	-0.250955	-0.341988	-0.107329	-0.0290778	0.850929	0.859455	0.995762	0.338422	0.899374	0.863301	0.999797	0.830393	0.899806	0.901092	0.951737	0
GTCTAATCAATTCAAAAGCA	-	chrII	357346	357368	Q943*	NA	NA	NA	NA	FALSE	neStops	YBR059C	AKL1	Ser-Thr protein kinase; member (with Ark1p and Prk1p) of the Ark kinase family; involved in endocytosis and actin cytoskeleton organization	0.0466757	0.253235	-0.243617	0.0750301	0.0561723	-0.289071	-0.0747261	0.215827	0.185112	0.151571	-0.00321004	0.929824	0.857461	0.983555	0.863361	0.899374	0.485395	0.98997	0.846141	0.924709	0.901092	0.953669	0
AACCATTTAAAATAAGGCAT	+	chrII	361419	361441	G365S	NA	NA	-5.9	5.9	TRUE	eProvs	YBR060C	ORC2	Subunit of the origin recognition complex (ORC); ORC directs DNA replication by binding to replication origins and is also involved in transcriptional silencing; interacts with Spp1p and with trimethylated histone H3; phosphorylated by Cdc28p	-0.344072	-0.307201	-0.175072	-0.192612	0.204867	-0.157144	0.0423993	0.554302	-0.166159	0.0334617	0.208465	0.808403	0.878625	0.988601	0.778336	0.899374	0.787247	0.999238	0.74462	0.937088	0.903529	0.898132	0
AAGCGTGGTACTCAAAGAAC	-	chrII	360857	360879	R547C	NA	NA	-5.414	5.414	TRUE	eProvs	YBR060C	ORC2	Subunit of the origin recognition complex (ORC); ORC directs DNA replication by binding to replication origins and is also involved in transcriptional silencing; interacts with Spp1p and with trimethylated histone H3; phosphorylated by Cdc28p	-0.0878636	0.114926	0.144127	-0.265716	0.0262914	-0.234404	0.291779	0.079921	-0.122781	0.218396	-0.181073	0.918585	0.9567	0.988601	0.634167	0.9137	0.672997	0.855798	0.890497	0.940889	0.901092	0.87395	0
ACCTACACCATAAAATAATA	+	chrII	361555	361577	G318D	V319I	NA	c(-6.883, 0.25)	6.883	TRUE	eProvs	YBR060C	ORC2	Subunit of the origin recognition complex (ORC); ORC directs DNA replication by binding to replication origins and is also involved in transcriptional silencing; interacts with Spp1p and with trimethylated histone H3; phosphorylated by Cdc28p	0.074245	0.329426	-0.270746	-0.0885943	-0.034385	-0.203311	-0.223519	0.288558	0.140767	0.0340703	-0.357983	0.92444	0.833563	0.983555	0.865382	0.9137	0.745307	0.938944	0.819109	0.937088	0.903529	0.722701	0
CTTCTAATGAGATAGCTCTA	-	chrII	360787	360809	S570F	NA	NA	-5.527	5.527	TRUE	eProvs	YBR060C	ORC2	Subunit of the origin recognition complex (ORC); ORC directs DNA replication by binding to replication origins and is also involved in transcriptional silencing; interacts with Spp1p and with trimethylated histone H3; phosphorylated by Cdc28p	0.304067	-0.260588	0.469476	-0.0862802	0.0635403	-0.0207061	-0.100791	-0.394567	-0.216268	0.00163909	0.357461	0.742975	0.85085	0.648661	0.854241	0.899374	0.863301	0.98398	0.714521	0.900553	0.917455	0.603586	0
TAACCATTTAAAATAAGGCA	+	chrII	361418	361440	G365N	NA	NA	-5.9	5.9	TRUE	eProvs	YBR060C	ORC2	Subunit of the origin recognition complex (ORC); ORC directs DNA replication by binding to replication origins and is also involved in transcriptional silencing; interacts with Spp1p and with trimethylated histone H3; phosphorylated by Cdc28p	-0.14319	-0.109823	-0.312217	0.0527957	-0.27029	-0.18982	-0.330929	0.395938	-0.0596918	0.154252	0.152128	0.910713	0.971991	0.983555	0.888562	0.875122	0.763365	0.905916	0.819109	0.957553	0.901092	0.898132	0
TTGGGTACCCTACACGTATG	-	chrII	360693	360715	P603S	NA	NA	-5.558	5.558	TRUE	eProvs	YBR060C	ORC2	Subunit of the origin recognition complex (ORC); ORC directs DNA replication by binding to replication origins and is also involved in transcriptional silencing; interacts with Spp1p and with trimethylated histone H3; phosphorylated by Cdc28p	0.317065	0.518271	-0.0783373	0.0213041	0.0387937	0.290891	0.282681	-0.584252	0.508055	0.424805	0.615188	0.850929	0.833563	0.995762	0.892952	0.9137	0.684436	0.929099	0.756579	0.775869	0.885443	0.540421	0
CTCATCCTAAAACATTGGCG	-	chrII	365396	365418	P103F	NA	NA	-8.027	8.027	FALSE	neProvs	YBR061C	TRM7	2'-O-ribose methyltransferase; methylates the 2'-O-ribose of tRNA-Phe, tRNA-Trp, and tRNA-Leu at positions C32 and N34 of tRNA anticodon loop; crucial biological role likely modification of tRNA-Phe; interacts with Trm732p and Rtt10p in 2'-O-methylation of C32 and N34 substrate tRNAs, respectively; yeast null mutant can be functionally complemented by human FTSJ1, mutations in which have been imp…	-0.0288124	0.353645	0.149898	0.0517276	-0.345689	0.10378	-0.108079	-0.171748	-0.287423	0.0582857	-0.0429938	0.933108	0.576343	0.986573	0.865382	0.475752	0.754154	0.971969	0.831107	0.782996	0.901092	0.939175	0
AACATCCCAATTGAAATAAC	-	chrII	367190	367212	P327L	NA	NA	-5.424	5.424	FALSE	neProvs	YBR063C	YBR063C	Putative protein of unknown function; YBR063C is not an essential gene	-0.0288253	0.101066	0.017931	-0.0702166	0.103405	0.189078	0.262152	0.134436	-0.185067	0.284447	0.0878541	0.934906	0.962103	0.9985	0.869273	0.899374	0.696876	0.906672	0.862773	0.924709	0.899818	0.928647	0
AGTCAGTTCTCAGCATTGGT	-	chrII	367648	367670	S173L	NA	NA	-5.955	5.955	FALSE	neProvs	YBR063C	YBR063C	Putative protein of unknown function; YBR063C is not an essential gene	-0.0978767	0.221293	0.0787842	0.00275025	0.0536891	0.26468	-0.0813608	-0.0569671	-0.00376914	0.468292	0.22382	0.918433	0.875616	0.990002	0.898602	0.899374	0.597526	0.990522	0.891371	0.963087	0.542653	0.828775	0
TATGCTCCAGTTATTTCAAT	+	chrII	367184	367206	G332K	A333T	NA	c(-7.939, -0.97)	7.939	FALSE	neProvs	YBR063C	YBR063C	Putative protein of unknown function; YBR063C is not an essential gene	-0.0788362	-0.141211	0.425648	-0.0409765	0.0668062	0.118333	-0.161387	0.0560224	0.0359017	0.0671043	0.159335	0.921387	0.9567	0.942378	0.88456	0.899374	0.80951	0.969132	0.894115	0.959419	0.901092	0.912546	0
AAGCACTGCTCACATATATT	+	chrII	369629	369651	C16Y	NA	NA	-10.45	10.45	FALSE	neProvs	YBR065C	ECM2	Pre-mRNA splicing factor; facilitates the cooperative formation of U2/U6 helix II in association with stem II in the spliceosome, function may be regulated by Slu7p	0.0371838	0.0249966	0.391093	-0.179959	0.276838	0.0995739	0.179001	-0.0795713	-0.0610882	-0.0504949	-0.0111781	0.933108	0.980084	0.85813	0.788389	0.830404	0.824797	0.959415	0.885945	0.957553	0.901984	0.952416	0
ATCTGTCCGCATGAGGGCTG	-	chrII	370134	370156	P184L	NA	NA	-9.048	9.048	FALSE	neProvs	YBR066C	NRG2	Transcriptional repressor; mediates glucose repression and negatively regulates filamentous growth; activated in stochastic pulses of nuclear localization in response to low glucose	-0.0272111	0.03083	0.295068	0.0965795	-0.118216	0.113948	0.164158	0.0169693	0.31446	-0.085328	0.00469615	0.933108	0.977007	0.85813	0.840909	0.899374	0.7589	0.945552	0.902804	0.715056	0.901092	0.953669	0
[truncated: 15,613 more rows]

## Sheet: genes
geneSys	gene	geneDescr	essential	Eno2_log2fc	Fas1_log2fc	Fas2_log2fc	Htb2_log2fc	Rnr2_log2fc	Rpl9A_log2fc	Ssa1_log2fc	Tdh1_log2fc	Tdh2_log2fc	Tdh3_log2fc	Yhb1_log2fc	Eno2_q	Fas1_q	Fas2_q	Htb2_q	Rnr2_q	Rpl9A_q	Ssa1_q	Tdh1_q	Tdh2_q	Tdh3_q	Yhb1_q	FDR0.05_count
[truncated: 4,512 more rows]
