# Supplementary material for: Genome-wide base editor screen identifies regulators of protein abundance in yeast
Source: bioRxiv preprint, doi:10.1101/2022.03.09.483657, version 1 (2022-03-09)
Supplement: Supplemental Table 5 [file 483657_file07.xlsx]

## Sheet: Sheet1
geneSys	gene	log2FC_IRA2	log2FC_RAS21	log2FC_RAS22	log2FC_POP1	log2FC_SSY5	log2FC_SIT4	log2FC_SAP155	adj.p_IRA2	adj.p_RAS21	adj.p_RAS22	adj.p_POP1	adj.p_SSY5	adj.p_SIT4	adj.p_SAP155	log2FC.i_IRA2	log2FC.i_RAS21	log2FC.i_RAS22	log2FC.i_POP1	log2FC.i_SSY5	log2FC.i_SIT4	log2FC.i_SAP155	adj.p.i_IRA2	adj.p.i_RAS21	adj.p.i_RAS22	adj.p.i_POP1	adj.p.i_SSY5	adj.p.i_SIT4	adj.p.i_SAP155
Q0250	COX2	-0.59968	#NAME?	0.345556	0.0955579	-0.698483	2.53189	0.290584	0.312103	NA	0.560665	0.896089	0.282722	0.000426485	0.59447	-0.59968	-12.1861	0.345556	0.0955579	-0.698483	2.53189	0.290584	0.312103	0.0244926	0.560665	0.896089	0.282722	0.000426485	0.59447
R0040C	NA	0.322515	-0.236851	-0.432113	-0.534435	-0.0460711	-0.688255	-0.858714	0.687039	0.782616	0.60216	0.466728	0.951485	0.529925	0.229617	0.322515	-0.236851	-0.432113	-0.534435	-0.0460711	-0.688255	-0.858714	0.687039	0.782616	0.60216	0.466728	0.951485	0.529925	0.229617
YAL003W	EFB1	0.0767456	-0.414112	-0.415488	-0.806886	-0.230837	-0.566064	-0.804456	0.817992	0.14339	0.119762	0.00689498	0.418281	0.0412664	0.00308236	0.0767456	-0.414112	-0.415488	-0.806886	-0.230837	-0.566064	-0.804456	0.817992	0.14339	0.119762	0.00689498	0.418281	0.0412664	0.00308236
YAL005C	SSA1	-1.18556	-0.0896305	0.642928	-0.439002	-1.09306	0.903073	0.396311	8.84345e-06	0.69083	0.00171829	0.0250544	1.91169e-05	9.43208e-05	0.0239799	-1.18556	-0.0896305	0.642928	-0.439002	-1.09306	0.903073	0.396311	8.84345e-06	0.69083	0.00171829	0.0250544	1.91169e-05	9.43208e-05	0.0239799
YAL007C	ERP2	-0.381002	-0.0669406	-0.696967	-0.236501	0.600385	-0.782023	#NAME?	0.735166	0.944481	0.489029	0.794921	0.428848	0.45767	NA	-0.381002	-0.0669406	-0.696967	-0.236501	0.600385	-0.782023	-12.2607	0.735166	0.944481	0.489029	0.794921	0.428848	0.45767	0.0173815
YAL012W	CYS3	-0.146642	-0.0638796	-0.276101	-0.593403	0.189256	0.0621987	-0.42794	0.511573	0.80361	0.166433	0.00747786	0.373114	0.809902	0.0239799	-0.146642	-0.0638796	-0.276101	-0.593403	0.189256	0.0621987	-0.42794	0.511573	0.80361	0.166433	0.00747786	0.373114	0.809902	0.0239799
YAL016W	TPD3	-0.293878	0.0600119	-1.10877	-0.407457	0.269094	-0.268962	-0.985943	0.436177	0.902319	0.00324527	0.251859	0.464116	0.536268	0.00454706	-0.293878	0.0600119	-1.10877	-0.407457	0.269094	-0.268962	-0.985943	0.436177	0.902319	0.00324527	0.251859	0.464116	0.536268	0.00454706
YAL017W	PSK1	0.0547144	0.884271	1.10386	0.46153	0.652499	1.01211	0.184017	0.964253	0.252351	0.12644	0.550396	0.549793	0.177204	0.829395	0.0547144	0.884271	1.10386	0.46153	0.652499	1.01211	0.184017	0.964253	0.252351	0.12644	0.550396	0.549793	0.177204	0.829395
YAL019W	FUN30	-0.800005	-1.09985	-1.14354	-1.06385	-0.220358	-1.33264	-1.64548	0.331765	0.146105	0.149222	0.295341	0.84437	0.0787913	0.0801997	-0.800005	-1.09985	-1.14354	-1.06385	-0.220358	-1.33264	-1.64548	0.331765	0.146105	0.149222	0.295341	0.84437	0.0787913	0.0801997
YAL021C	CCR4	-0.143118	-0.0946616	-1.20277	-0.904727	0.0319614	-0.0537384	-0.695369	0.797198	0.874836	0.0722078	0.0947681	0.950352	0.937482	0.245465	-0.143118	-0.0946616	-1.20277	-0.904727	0.0319614	-0.0537384	-0.695369	0.797198	0.874836	0.0722078	0.0947681	0.950352	0.937482	0.245465
YAL023C	PMT2	-0.647287	-0.0685899	-1.45875	-1.0897	0.263809	-0.51193	-0.668396	0.268627	0.931366	0.0113848	0.0564459	0.663206	0.390679	0.190855	-0.647287	-0.0685899	-1.45875	-1.0897	0.263809	-0.51193	-0.668396	0.268627	0.931366	0.0113848	0.0564459	0.663206	0.390679	0.190855
YAL025C	MAK16	-0.415414	-0.665776	-1.19214	-1.83156	-0.97018	-1.54116	-1.66524	0.516156	0.280893	0.0385129	0.00447608	0.0963713	0.011255	0.00380022	-0.415414	-0.665776	-1.19214	-1.83156	-0.97018	-1.54116	-1.66524	0.516156	0.280893	0.0385129	0.00447608	0.0963713	0.011255	0.00380022
YAL026C	DRS2	Inf	NA	Inf	NA	NA	NA	NA	NA	NA	NA	NA	NA	NA	NA	10.4815	NA	10.9995	NA	NA	NA	NA	0.041819	NA	0.0265407	NA	NA	NA	NA
YAL029C	MYO4	-1.09605	-1.85673	-0.591415	-0.85967	-0.831634	-0.0395342	-0.571679	0.106729	0.0126498	0.318019	0.152242	0.167479	0.959611	0.293115	-1.09605	-1.85673	-0.591415	-0.85967	-0.831634	-0.0395342	-0.571679	0.106729	0.0126498	0.318019	0.152242	0.167479	0.959611	0.293115
YAL032C	PRP45	#NAME?	#NAME?	#NAME?	#NAME?	#NAME?	-1.64571	#NAME?	NA	NA	NA	NA	NA	0.407641	NA	-10.8222	-10.4185	-11.0643	-9.43999	-9.77974	-1.64571	-12.9522	0.0360062	0.0478316	0.0463121	0.0152952	0.0457449	0.407641	0.0427454
YAL034W-A	MTW1	#NAME?	-0.0590932	0.115686	0.229004	-0.465079	#NAME?	-0.60332	NA	0.954694	0.907712	0.861819	0.603807	NA	0.555597	-11.1991	-0.0590932	0.115686	0.229004	-0.465079	-9.4571	-0.60332	0.039133	0.954694	0.907712	0.861819	0.603807	0.0409694	0.555597
YAL035W	FUN12	-0.190824	-0.634151	-1.15136	-1.07536	0.0298617	-0.317544	-1.38352	0.411741	0.00876088	4.07379e-05	0.000173828	0.909616	0.149834	4.65387e-06	-0.190824	-0.634151	-1.15136	-1.07536	0.0298617	-0.317544	-1.38352	0.411741	0.00876088	4.07379e-05	0.000173828	0.909616	0.149834	4.65387e-06
YAL036C	RBG1	-0.170108	-0.953481	-1.32496	-0.93757	-0.764543	-0.884704	-1.39001	0.571582	0.0024731	8.88813e-05	0.00248313	0.00723699	0.00267517	3.86349e-05	-0.170108	-0.953481	-1.32496	-0.93757	-0.764543	-0.884704	-1.39001	0.571582	0.0024731	8.88813e-05	0.00248313	0.00723699	0.00267517	3.86349e-05
YAL038W	CDC19	-0.273188	-0.104355	-0.265613	-0.354152	-0.325705	-0.0383465	-0.365104	0.0682095	0.518725	0.0643747	0.0206337	0.0282231	0.835942	0.00934643	-0.273188	-0.104355	-0.265613	-0.354152	-0.325705	-0.0383465	-0.365104	0.0682095	0.518725	0.0643747	0.0206337	0.0282231	0.835942	0.00934643
YAL039C	CYC3	#NAME?	0.755465	0.694428	-0.23178	-0.522877	0.853962	-0.678317	NA	0.231593	0.242631	0.758467	0.401596	0.162569	0.21174	-9.51162	0.755465	0.694428	-0.23178	-0.522877	0.853962	-0.678317	0.0497991	0.231593	0.242631	0.758467	0.401596	0.162569	0.21174
YAL041W	CDC24	#NAME?	-1.35673	#NAME?	#NAME?	#NAME?	-1.56276	-1.32749	NA	0.133763	NA	NA	NA	0.135408	0.12141	-9.66299	-1.35673	-9.90507	-8.28077	-8.62052	-1.56276	-1.32749	0.0454624	0.133763	0.043577	0.0220732	0.0483989	0.135408	0.12141
YAL042W	ERV46	0.515433	0.511576	-0.605476	-1.22866	-0.335779	0.430104	-0.455047	0.607593	0.618543	0.520017	0.173933	0.739927	0.684869	0.601393	0.515433	0.511576	-0.605476	-1.22866	-0.335779	0.430104	-0.455047	0.607593	0.618543	0.520017	0.173933	0.739927	0.684869	0.601393
YAL043C	PTA1	1.39073	0.598104	0.589619	0.635281	1.5962	NA	NA	0.290211	0.670261	0.64911	0.603404	0.224955	NA	NA	1.39073	0.598104	0.589619	0.635281	1.5962	NA	NA	0.290211	0.670261	0.64911	0.603404	0.224955	NA	NA
YAL044C	GCV3	-1.00963	-0.957697	-0.0279791	1.00359	-0.719807	-0.460524	0.192562	0.000263084	0.000721475	0.918526	0.000376753	0.00329335	0.0434627	0.352163	-1.00963	-0.957697	-0.0279791	1.00359	-0.719807	-0.460524	0.192562	0.000263084	0.000721475	0.918526	0.000376753	0.00329335	0.0434627	0.352163
YAL044W-A	BOL1	-1.00768	0.10705	0.0672368	-0.539749	-0.644299	0.160864	-0.707436	0.468894	0.945158	0.965973	0.670837	0.598018	0.919619	0.563992	-1.00768	0.10705	0.0672368	-0.539749	-0.644299	0.160864	-0.707436	0.468894	0.945158	0.965973	0.670837	0.598018	0.919619	0.563992
YAL046C	BOL3	-1.08948	-0.512236	0.458826	-0.361127	-0.527706	0.804771	-0.107816	0.15461	0.572846	0.551084	0.656933	0.499891	0.294287	0.889593	-1.08948	-0.512236	0.458826	-0.361127	-0.527706	0.804771	-0.107816	0.15461	0.572846	0.551084	0.656933	0.499891	0.294287	0.889593
YAL049C	AIM2	-1.74526	-0.684979	-0.78364	-1.79988	-1.7164	0.000188695	-1.00626	0.0689087	0.507636	0.409733	0.0577405	0.0677247	0.999772	0.236778	-1.74526	-0.684979	-0.78364	-1.79988	-1.7164	0.000188695	-1.00626	0.0689087	0.507636	0.409733	0.0577405	0.0677247	0.999772	0.236778
YAL053W	FLC2	0.029761	0.720605	1.22026	-0.0685154	0.373228	0.458059	0.647244	0.9785	0.323784	0.0805967	0.957419	0.602364	0.580673	0.442421	0.029761	0.720605	1.22026	-0.0685154	0.373228	0.458059	0.647244	0.9785	0.323784	0.0805967	0.957419	0.602364	0.580673	0.442421
YAL059W	ECM1	-0.690748	-0.450858	-0.902041	-0.535734	0.155987	-0.101715	-1.43121	0.439126	0.634163	0.269794	0.540759	0.872673	0.927975	0.0566902	-0.690748	-0.450858	-0.902041	-0.535734	0.155987	-0.101715	-1.43121	0.439126	0.634163	0.269794	0.540759	0.872673	0.927975	0.0566902
YAL060W	BDH1	-1.42617	-1.32644	0.0872746	0.329675	-1.42912	2.42903	1.30346	0.0356559	0.0589152	0.912556	0.650665	0.0323454	0.00108862	0.0321162	-1.42617	-1.32644	0.0872746	0.329675	-1.42912	2.42903	1.30346	0.0356559	0.0589152	0.912556	0.650665	0.0323454	0.00108862	0.0321162
YAR002C-A	ERP1	0.0665647	-0.049361	-0.45192	-1.04907	0.335952	-0.82504	-0.899536	0.913415	0.9397	0.330372	0.0289944	0.496765	0.0797764	0.0353365	0.0665647	-0.049361	-0.45192	-1.04907	0.335952	-0.82504	-0.899536	0.913415	0.9397	0.330372	0.0289944	0.496765	0.0797764	0.0353365
YAR002W	NUP60	-1.19205	-1.00503	-1.33468	-0.868516	-1.96958	-1.57585	-1.75743	0.0331366	0.0792028	0.0155402	0.112298	0.00132368	0.0061767	0.00158118	-1.19205	-1.00503	-1.33468	-0.868516	-1.96958	-1.57585	-1.75743	0.0331366	0.0792028	0.0155402	0.112298	0.00132368	0.0061767	0.00158118
YAR007C	RFA1	-0.787494	-0.296673	-0.468083	-0.630303	-1.02893	-0.529903	-1.20423	0.0146952	0.370209	0.119762	0.0444739	0.00242515	0.0884512	0.000362888	-0.787494	-0.296673	-0.468083	-0.630303	-1.02893	-0.529903	-1.20423	0.0146952	0.370209	0.119762	0.0444739	0.00242515	0.0884512	0.000362888
YAR014C	BUD14	-0.0239513	-0.404243	-0.320213	-0.0960082	0.0488516	-0.229487	-0.597661	0.976656	0.5676	0.59243	0.895235	0.944455	0.767321	0.243098	-0.0239513	-0.404243	-0.320213	-0.0960082	0.0488516	-0.229487	-0.597661	0.976656	0.5676	0.59243	0.895235	0.944455	0.767321	0.243098
YAR015W	ADE1	-0.339002	0.265083	-0.175577	0.33085	0.352284	-0.653389	-0.032277	0.345523	0.481516	0.632058	0.350886	0.317707	0.0585528	0.932628	-0.339002	0.265083	-0.175577	0.33085	0.352284	-0.653389	-0.032277	0.345523	0.481516	0.632058	0.350886	0.317707	0.0585528	0.932628
YAR042W	SWH1	-0.714929	-0.104731	-0.378412	-0.252932	-0.620047	1.21902	-0.131431	0.255436	0.883751	0.501761	0.672509	0.26253	0.0280878	0.817058	-0.714929	-0.104731	-0.378412	-0.252932	-0.620047	1.21902	-0.131431	0.255436	0.883751	0.501761	0.672509	0.26253	0.0280878	0.817058
YBL001C	ECM15	-2.42203	-1.00711	-0.906346	-0.830103	-2.74201	0.221828	-1.39218	0.0108421	0.288988	0.306338	0.372026	0.00433346	0.844708	0.085113	-2.42203	-1.00711	-0.906346	-0.830103	-2.74201	0.221828	-1.39218	0.0108421	0.288988	0.306338	0.372026	0.00433346	0.844708	0.085113
YBL004W	UTP20	-0.680419	-1.03003	-0.104763	0.451371	-0.531675	1.01614	-0.539475	0.594726	0.40818	0.941672	0.731265	0.666461	0.406042	0.629728	-0.680419	-1.03003	-0.104763	0.451371	-0.531675	1.01614	-0.539475	0.594726	0.40818	0.941672	0.731265	0.666461	0.406042	0.629728
YBL007C	SLA1	-1.30892	-1.06894	-0.445164	-0.576931	-1.04378	-0.818644	-0.797102	0.000123733	0.00102583	0.0910732	0.0372091	0.000822623	0.00456682	0.00300986	-1.30892	-1.06894	-0.445164	-0.576931	-1.04378	-0.818644	-0.797102	0.000123733	0.00102583	0.0910732	0.0372091	0.000822623	0.00456682	0.00300986
YBL015W	ACH1	-1.38123	-0.878081	1.45466	0.416573	-0.777873	4.24824	2.19616	0.0353527	0.186967	0.0233977	0.537081	0.234861	3.05698e-06	0.00104044	-1.38123	-0.878081	1.45466	0.416573	-0.777873	4.24824	2.19616	0.0353527	0.186967	0.0233977	0.537081	0.234861	3.05698e-06	0.00104044
YBL016W	FUS3	#NAME?	#NAME?	#NAME?	#NAME?	0.264861	#NAME?	#NAME?	NA	NA	NA	NA	0.875798	NA	NA	-8.05638	-7.65265	-8.29845	-6.67416	0.264861	-6.31435	-10.1863	0.022791	0.0232685	0.0462039	0.0168967	0.875798	0.0306322	0.0334674
YBL017C	PEP1	-0.844668	-0.326309	-0.390511	-0.108088	-0.786794	0.256738	-1.56957	0.25641	0.702884	0.608948	0.907605	0.282302	0.772242	0.0196441	-0.844668	-0.326309	-0.390511	-0.108088	-0.786794	0.256738	-1.56957	0.25641	0.702884	0.608948	0.907605	0.282302	0.772242	0.0196441
YBL019W	APN2	1.13099	0.239093	-0.00733499	0.0231282	0.209028	-0.280625	-0.391549	0.0119691	0.648513	0.988745	0.969945	0.636829	0.543928	0.302876	1.13099	0.239093	-0.00733499	0.0231282	0.209028	-0.280625	-0.391549	0.0119691	0.648513	0.988745	0.969945	0.636829	0.543928	0.302876
YBL022C	PIM1	-0.983458	-0.385252	-0.25027	-0.401891	-0.710088	0.864113	-1.05696	0.0882326	0.540681	0.682324	0.499189	0.216638	0.129536	0.0404473	-0.983458	-0.385252	-0.25027	-0.401891	-0.710088	0.864113	-1.05696	0.0882326	0.540681	0.682324	0.499189	0.216638	0.129536	0.0404473
YBL023C	MCM2	-0.244626	-0.457637	-0.481928	-0.370816	-0.598394	0.172009	#NAME?	0.761263	0.637521	0.514034	0.620733	0.514549	0.871874	NA	-0.244626	-0.457637	-0.481928	-0.370816	-0.598394	0.172009	-9.01928	0.761263	0.637521	0.514034	0.620733	0.514549	0.871874	0.0213129
YBL024W	NCL1	0.0662085	-0.440228	-0.755384	-0.860971	-0.0893931	-0.8014	-1.28518	0.812428	0.0700907	0.00225097	0.00138201	0.727772	0.00168327	1.79535e-05	0.0662085	-0.440228	-0.755384	-0.860971	-0.0893931	-0.8014	-1.28518	0.812428	0.0700907	0.00225097	0.00138201	0.727772	0.00168327	1.79535e-05
YBL026W	LSM2	-0.422566	-0.599138	-0.668441	-1.11694	-0.481115	-1.20448	-1.11836	0.473011	0.298204	0.209626	0.0434934	0.395519	0.0293413	0.0260183	-0.422566	-0.599138	-0.668441	-1.11694	-0.481115	-1.20448	-1.11836	0.473011	0.298204	0.209626	0.0434934	0.395519	0.0293413	0.0260183
YBL028C	YBL028C	0.28375	-0.714529	-0.959241	-0.855239	0.281421	-1.15401	-1.04803	0.684938	0.269979	0.155164	0.166511	0.666461	0.0666752	0.182931	0.28375	-0.714529	-0.959241	-0.855239	0.281421	-1.15401	-1.04803	0.684938	0.269979	0.155164	0.166511	0.666461	0.0666752	0.182931
YBL030C	PET9	-1.04787	-0.991371	-0.50674	-0.565309	-0.57845	1.8376	-0.262751	2.6794e-05	7.92692e-05	0.00741976	0.00518169	0.00358522	2.95419e-08	0.113732	-1.04787	-0.991371	-0.50674	-0.565309	-0.57845	1.8376	-0.262751	2.6794e-05	7.92692e-05	0.00741976	0.00518169	0.00358522	2.95419e-08	0.113732
YBL032W	HEK2	-0.552798	-0.224286	-0.461717	-0.288759	-1.39932	-0.652431	-0.721697	0.217849	0.654369	0.278954	0.525662	0.00296605	0.134945	0.0649343	-0.552798	-0.224286	-0.461717	-0.288759	-1.39932	-0.652431	-0.721697	0.217849	0.654369	0.278954	0.525662	0.00296605	0.134945	0.0649343
YBL033C	RIB1	-1.36327	-1.60497	-1.01992	-0.19863	-1.15676	0.761801	-0.667836	0.0717849	0.0437769	0.114994	0.796981	0.0803226	0.260467	0.262701	-1.36327	-1.60497	-1.01992	-0.19863	-1.15676	0.761801	-0.667836	0.0717849	0.0437769	0.114994	0.796981	0.0803226	0.260467	0.262701
YBL035C	POL12	-0.462058	-0.647549	-0.908129	-1.3661	#NAME?	-0.431239	-1.60737	0.481873	0.323706	0.187322	0.132088	NA	0.569509	0.055714	-0.462058	-0.647549	-0.908129	-1.3661	-10.843	-0.431239	-1.60737	0.481873	0.323706	0.187322	0.132088	0.0202786	0.569509	0.055714
YBL036C	YBL036C	-1.05712	-0.584136	-0.819553	-0.366053	-0.431276	-0.599438	-1.38129	0.00437902	0.0986064	0.0174282	0.290956	0.214374	0.0821835	0.000277826	-1.05712	-0.584136	-0.819553	-0.366053	-0.431276	-0.599438	-1.38129	0.00437902	0.0986064	0.0174282	0.290956	0.214374	0.0821835	0.000277826
YBL039C	URA7	0.379915	-0.236808	-0.905465	-0.786363	0.124351	-0.758057	-1.33351	0.112215	0.342027	0.000628744	0.00297264	0.61465	0.00277305	1.41596e-05	0.379915	-0.236808	-0.905465	-0.786363	0.124351	-0.758057	-1.33351	0.112215	0.342027	0.000628744	0.00297264	0.61465	0.00277305	1.41596e-05
YBL041W	PRE7	-0.385969	-0.337144	-0.532734	-0.564908	-0.247703	-0.407179	-0.695026	0.307019	0.385971	0.130915	0.119687	0.520255	0.277345	0.0363074	-0.385969	-0.337144	-0.532734	-0.564908	-0.247703	-0.407179	-0.695026	0.307019	0.385971	0.130915	0.119687	0.520255	0.277345	0.0363074
YBL045C	COR1	-1.84665	-1.32608	0.399882	-0.564164	-1.79253	2.26346	0.4915	4.33592e-06	0.000233038	0.134339	0.043405	5.91095e-06	2.28977e-07	0.04914	-1.84665	-1.32608	0.399882	-0.564164	-1.79253	2.26346	0.4915	4.33592e-06	0.000233038	0.134339	0.043405	5.91095e-06	2.28977e-07	0.04914
YBL046W	PSY4	1.01659	-1.8592	-2.0866	0.537639	-0.762232	#NAME?	#NAME?	0.0759025	0.0114978	0.0134731	0.372415	0.145269	NA	NA	1.01659	-1.8592	-2.0866	0.537639	-0.762232	-6.38973	-10.2617	0.0759025	0.0114978	0.0134731	0.372415	0.145269	0.0381807	0.0484823
YBL047C	EDE1	-1.34895	-0.985097	-0.15903	-0.695074	-1.21616	-0.0220915	-0.773079	2.61181e-05	0.000743427	0.5174	0.00687849	5.71699e-05	0.945381	0.00142556	-1.34895	-0.985097	-0.15903	-0.695074	-1.21616	-0.0220915	-0.773079	2.61181e-05	0.000743427	0.5174	0.00687849	5.71699e-05	0.945381	0.00142556
YBL050W	SEC17	-0.503464	-0.217701	0.00658269	-0.193427	-0.325837	0.0550747	0.108551	0.0870198	0.489121	0.985443	0.523499	0.267384	0.883858	0.704251	-0.503464	-0.217701	0.00658269	-0.193427	-0.325837	0.0550747	0.108551	0.0870198	0.489121	0.985443	0.523499	0.267384	0.883858	0.704251
YBL051C	PIN4	-0.778098	-0.348023	-0.5811	-0.657168	-0.680719	0.636858	0.604588	0.0882326	0.477503	0.183457	0.140831	0.128149	0.157708	0.133314	-0.778098	-0.348023	-0.5811	-0.657168	-0.680719	0.636858	0.604588	0.0882326	0.477503	0.183457	0.140831	0.128149	0.157708	0.133314
YBL055C	YBL055C	0.507986	-0.704319	-1.12818	-0.157677	0.0342588	-0.0101699	-1.00074	0.532319	0.432285	0.119762	0.880125	0.965064	0.994592	0.134271	0.507986	-0.704319	-1.12818	-0.157677	0.0342588	-0.0101699	-1.00074	0.532319	0.432285	0.119762	0.880125	0.965064	0.994592	0.134271
YBL056W	PTC3	-1.28266	-0.994267	-0.493658	-0.717688	-0.67177	0.0870503	-0.871628	0.0256838	0.0859674	0.374385	0.19548	0.235725	0.907837	0.0811379	-1.28266	-0.994267	-0.493658	-0.717688	-0.67177	0.0870503	-0.871628	0.0256838	0.0859674	0.374385	0.19548	0.235725	0.907837	0.0811379
YBL057C	PTH2	0.69826	-0.129313	-0.124365	0.140804	0.339287	0.261774	-0.619033	0.586576	0.938538	0.929532	0.927514	0.797527	0.859864	0.618568	0.69826	-0.129313	-0.124365	0.140804	0.339287	0.261774	-0.619033	0.586576	0.938538	0.929532	0.927514	0.797527	0.859864	0.618568
YBL058W	SHP1	-0.751794	-0.818772	-0.347929	-0.543196	-0.834223	-0.364011	-0.707097	0.00192685	0.00142457	0.0994127	0.0170092	0.000822623	0.0949159	0.00144905	-0.751794	-0.818772	-0.347929	-0.543196	-0.834223	-0.364011	-0.707097	0.00192685	0.00142457	0.0994127	0.0170092	0.000822623	0.0949159	0.00144905
YBL059C-A	CMC2	#NAME?	#NAME?	0.0803081	-0.708813	-1.08895	0.723174	-0.464246	NA	NA	0.904264	0.231543	0.150938	0.179332	0.37393	-10.9567	-10.5529	0.0803081	-0.708813	-1.08895	0.723174	-0.464246	0.01999	0.02517	0.904264	0.231543	0.150938	0.179332	0.37393
YBL064C	PRX1	-1.16319	-0.162131	1.72509	0.0314938	-0.786789	2.25408	1.58763	0.000905146	0.637521	1.67325e-05	0.939539	0.0113157	7.44284e-07	2.88691e-05	-1.16319	-0.162131	1.72509	0.0314938	-0.786789	2.25408	1.58763	0.000905146	0.637521	1.67325e-05	0.939539	0.0113157	7.44284e-07	2.88691e-05
YBL068W	PRS4	-0.650994	-0.783253	-1.44627	-1.07565	-0.454526	-0.852704	-1.05551	0.261295	0.133763	0.0137526	0.0397097	0.433137	0.0953732	0.0255844	-0.650994	-0.783253	-1.44627	-1.07565	-0.454526	-0.852704	-1.05551	0.261295	0.133763	0.0137526	0.0397097	0.433137	0.0953732	0.0255844
YBL069W	AST1	-0.390178	-0.893279	-0.161613	-0.0308883	-1.0281	-0.700653	0.196913	0.354668	0.0437769	0.739154	0.957175	0.0754459	0.0895318	0.650502	-0.390178	-0.893279	-0.161613	-0.0308883	-1.0281	-0.700653	0.196913	0.354668	0.0437769	0.739154	0.957175	0.0754459	0.0895318	0.650502
YBL076C	ILS1	-0.0240503	-0.309446	-1.18908	-0.573986	0.183642	-0.387089	-1.13547	0.922036	0.104395	4.93428e-06	0.00459336	0.333189	0.0379763	5.81171e-06	-0.0240503	-0.309446	-1.18908	-0.573986	0.183642	-0.387089	-1.13547	0.922036	0.104395	4.93428e-06	0.00459336	0.333189	0.0379763	5.81171e-06
YBL079W	NUP170	#NAME?	-0.0987232	-0.156948	-0.204427	1.98328	0.0889021	-0.282667	NA	0.886345	0.784417	0.731265	0.0175204	0.899038	0.700301	-13.8047	-0.0987232	-0.156948	-0.204427	1.98328	0.0889021	-0.282667	0.0183109	0.886345	0.784417	0.731265	0.0175204	0.899038	0.700301
YBL085W	BOI1	0.181935	-0.748431	-1.01081	-0.7467	-0.869932	0.0356081	-0.741311	0.860159	0.403185	0.27218	0.38757	0.368278	0.98001	0.387842	0.181935	-0.748431	-1.01081	-0.7467	-0.869932	0.0356081	-0.741311	0.860159	0.403185	0.27218	0.38757	0.368278	0.98001	0.387842
YBL090W	MRP21	-1.13608	-0.19874	-1.72395	-1.27807	-2.09559	-1.22698	-1.29793	0.482228	0.918251	0.27218	0.419294	0.216251	0.316172	0.263701	-1.13608	-0.19874	-1.72395	-1.27807	-2.09559	-1.22698	-1.29793	0.482228	0.918251	0.27218	0.419294	0.216251	0.316172	0.263701
YBL091C	MAP2	-0.459349	-0.536306	-0.473519	-0.465776	-0.49585	-0.955875	-0.7301	0.151234	0.0960047	0.118261	0.133711	0.109788	0.00401021	0.0130365	-0.459349	-0.536306	-0.473519	-0.465776	-0.49585	-0.955875	-0.7301	0.151234	0.0960047	0.118261	0.133711	0.109788	0.00401021	0.0130365
YBL092W	RPL32	0.381856	-0.0232727	0.024518	-0.168568	0.397051	-0.0716011	-0.045434	0.133006	0.944891	0.936073	0.519088	0.108828	0.821661	0.863752	0.381856	-0.0232727	0.024518	-0.168568	0.397051	-0.0716011	-0.045434	0.133006	0.944891	0.936073	0.519088	0.108828	0.821661	0.863752
YBL098W	BNA4	-0.266739	NA	NA	NA	NA	NA	0.0889154	0.874741	NA	NA	NA	NA	NA	0.953691	-0.266739	NA	NA	NA	NA	NA	0.0889154	0.874741	NA	NA	NA	NA	NA	0.953691
YBL099W	ATP1	-1.11385	-0.568175	0.487185	-0.240393	-1.03588	2.23605	0.829956	0.00455267	0.129139	0.167805	0.527938	0.00658611	6.99163e-06	0.0152459	-1.11385	-0.568175	0.487185	-0.240393	-1.03588	2.23605	0.829956	0.00455267	0.129139	0.167805	0.527938	0.00658611	6.99163e-06	0.0152459
YBL102W	SFT2	#NAME?	0.445112	0.518996	0.383414	1.35784	0.801062	0.411404	NA	0.544807	0.497475	0.586857	0.0466958	0.239226	0.557408	-11.8625	0.445112	0.518996	0.383414	1.35784	0.801062	0.411404	0.044014	0.544807	0.497475	0.586857	0.0466958	0.239226	0.557408
YBL104C	SEA4	-0.162131	0.426072	0.344368	#NAME?	-1.43708	1.18551	0.602399	0.840047	0.558647	0.572437	NA	0.0974147	0.0884007	0.260502	-0.162131	0.426072	0.344368	-10.2329	-1.43708	1.18551	0.602399	0.840047	0.558647	0.572437	0.0127337	0.0974147	0.0884007	0.260502
YBR003W	COQ1	-0.0361121	-0.530292	1.21201	0.695774	-0.855001	0.43117	0.281413	0.964732	0.429939	0.0301384	0.213227	0.12553	0.470432	0.640174	-0.0361121	-0.530292	1.21201	0.695774	-0.855001	0.43117	0.281413	0.964732	0.429939	0.0301384	0.213227	0.12553	0.470432	0.640174
YBR006W	UGA2	#NAME?	-0.860249	0.0279397	-0.435132	-1.15542	0.691699	-0.721511	NA	0.216302	0.97283	0.524599	0.19951	0.310108	0.267414	-9.41031	-0.860249	0.0279397	-0.435132	-1.15542	0.691699	-0.721511	0.012612	0.216302	0.97283	0.524599	0.19951	0.310108	0.267414
YBR011C	IPP1	-0.0943651	0.0836646	-0.0276278	-0.12773	0.304734	0.0381392	-0.24351	0.548071	0.601635	0.866444	0.386872	0.0333722	0.83379	0.0586576	-0.0943651	0.0836646	-0.0276278	-0.12773	0.304734	0.0381392	-0.24351	0.548071	0.601635	0.866444	0.386872	0.0333722	0.83379	0.0586576
YBR014C	GRX7	-0.784263	-0.597468	-0.0902374	-0.596695	-1.43462	-1.06589	-0.283941	0.293203	0.496233	0.917319	0.475769	0.0784365	0.192956	0.683708	-0.784263	-0.597468	-0.0902374	-0.596695	-1.43462	-1.06589	-0.283941	0.293203	0.496233	0.917319	0.475769	0.0784365	0.192956	0.683708
YBR015C	MNN2	-0.144609	-0.769968	-0.872745	-1.53336	-0.19444	-0.509489	-1.0705	0.823889	0.164307	0.0941544	0.016331	0.744008	0.359081	0.0494961	-0.144609	-0.769968	-0.872745	-1.53336	-0.19444	-0.509489	-1.0705	0.823889	0.164307	0.0941544	0.016331	0.744008	0.359081	0.0494961
YBR016W	YBR016W	-0.421226	0.0892806	0.420533	0.526884	0.716235	0.356242	0.374472	0.185094	0.81696	0.161155	0.125225	0.0227185	0.258102	0.177146	-0.421226	0.0892806	0.420533	0.526884	0.716235	0.356242	0.374472	0.185094	0.81696	0.161155	0.125225	0.0227185	0.258102	0.177146
YBR017C	KAP104	-0.812147	-0.787905	-0.611783	-1.08133	0.124905	-0.713893	-1.30443	0.111025	0.124291	0.243249	0.105795	0.820902	0.15045	0.0356539	-0.812147	-0.787905	-0.611783	-1.08133	0.124905	-0.713893	-1.30443	0.111025	0.124291	0.243249	0.105795	0.820902	0.15045	0.0356539
YBR025C	OLA1	-0.0475629	-0.623038	-0.951073	-0.990532	-0.142385	-0.571485	-1.31368	0.823889	0.00215684	2.68184e-05	3.81474e-05	0.430583	0.00253108	9.69766e-07	-0.0475629	-0.623038	-0.951073	-0.990532	-0.142385	-0.571485	-1.31368	0.823889	0.00215684	2.68184e-05	3.81474e-05	0.430583	0.00253108	9.69766e-07
YBR026C	ETR1	-1.078	-0.678076	1.18167	-0.22841	-1.0962	0.792968	-0.426435	0.00115321	0.0284394	0.000385275	0.450455	0.000922172	0.00878561	0.101157	-1.078	-0.678076	1.18167	-0.22841	-1.0962	0.792968	-0.426435	0.00115321	0.0284394	0.000385275	0.450455	0.000922172	0.00878561	0.101157
YBR029C	CDS1	0.39555	0.759782	-0.214127	-0.220973	1.69839	0.702369	0.17104	0.441613	0.124246	0.677719	0.67658	0.00149033	0.144311	0.720161	0.39555	0.759782	-0.214127	-0.220973	1.69839	0.702369	0.17104	0.441613	0.124246	0.677719	0.67658	0.00149033	0.144311	0.720161
YBR030W	RKM3	-1.8374	-0.719447	0.164297	-0.799521	-0.644026	0.0393352	-0.289553	0.00954946	0.23826	0.794578	0.222279	0.276509	0.959225	0.602948	-1.8374	-0.719447	0.164297	-0.799521	-0.644026	0.0393352	-0.289553	0.00954946	0.23826	0.794578	0.222279	0.276509	0.959225	0.602948
YBR031W	RPL4A	-0.2924	-0.719232	-1.26083	-2.04524	-0.45572	-1.62294	-1.7843	0.693629	0.29334	0.0471178	0.00419716	0.506979	0.0150862	0.00477959	-0.2924	-0.719232	-1.26083	-2.04524	-0.45572	-1.62294	-1.7843	0.693629	0.29334	0.0471178	0.00419716	0.506979	0.0150862	0.00477959
YBR034C	HMT1	-0.445375	-0.52805	-1.14392	-1.44823	-0.697963	-1.08408	-1.78554	0.518813	0.441759	0.0638905	0.0263457	0.27746	0.0881504	0.00394437	-0.445375	-0.52805	-1.14392	-1.44823	-0.697963	-1.08408	-1.78554	0.518813	0.441759	0.0638905	0.0263457	0.27746	0.0881504	0.00394437
YBR035C	PDX3	-0.226576	0.246712	0.429043	0.808706	0.380182	0.150113	0.57848	0.587963	0.558647	0.248056	0.0358956	0.325964	0.739485	0.0883911	-0.226576	0.246712	0.429043	0.808706	0.380182	0.150113	0.57848	0.587963	0.558647	0.248056	0.0358956	0.325964	0.739485	0.0883911
YBR037C	SCO1	0.225745	0.0457524	1.10219	0.333688	-0.357823	0.00777944	-0.548783	0.803466	0.964736	0.153621	0.693861	0.660301	0.995232	0.438726	0.225745	0.0457524	1.10219	0.333688	-0.357823	0.00777944	-0.548783	0.803466	0.964736	0.153621	0.693861	0.660301	0.995232	0.438726
YBR039W	ATP3	-1.27582	-1.23508	0.134506	-0.505254	-1.49578	2.1296	0.992416	9.68781e-05	0.000242213	0.624289	0.0519344	1.83991e-05	2.26381e-07	0.000397209	-1.27582	-1.23508	0.134506	-0.505254	-1.49578	2.1296	0.992416	9.68781e-05	0.000242213	0.624289	0.0519344	1.83991e-05	2.26381e-07	0.000397209
YBR041W	FAT1	1.05923	1.09963	#NAME?	0.197038	0.248688	0.173056	0.504228	0.260475	0.254244	NA	0.877808	0.793036	0.871079	0.611878	1.05923	1.09963	-9.68614	0.197038	0.248688	0.173056	0.504228	0.260475	0.254244	0.034084	0.877808	0.793036	0.871079	0.611878
YBR042C	CST26	-0.132968	-0.313368	-0.388818	-0.54422	-0.292685	-0.970557	-0.51297	0.782034	0.478645	0.332963	0.176597	0.492228	0.0191563	0.158337	-0.132968	-0.313368	-0.388818	-0.54422	-0.292685	-0.970557	-0.51297	0.782034	0.478645	0.332963	0.176597	0.492228	0.0191563	0.158337
YBR046C	ZTA1	-0.889288	-0.917777	0.732836	0.55412	-0.11411	-1.38544	-0.454537	0.479316	0.292273	0.37457	0.522356	0.907962	0.0974445	0.562328	-0.889288	-0.917777	0.732836	0.55412	-0.11411	-1.38544	-0.454537	0.479316	0.292273	0.37457	0.522356	0.907962	0.0974445	0.562328
YBR049C	REB1	-0.979544	-1.52302	-0.130294	-0.277211	-0.953301	-0.0469878	-1.0412	0.0296807	0.00260841	0.784683	0.549779	0.0305709	0.936467	0.0120898	-0.979544	-1.52302	-0.130294	-0.277211	-0.953301	-0.0469878	-1.0412	0.0296807	0.00260841	0.784683	0.549779	0.0305709	0.936467	0.0120898
YBR052C	RFS1	-2.48948	-1.34502	-0.166658	-1.01946	-2.23183	-1.26927	-2.09045	0.00110498	0.0326384	0.792964	0.0817162	0.000977345	0.0326574	0.000813308	-2.48948	-1.34502	-0.166658	-1.01946	-2.23183	-1.26927	-2.09045	0.00110498	0.0326384	0.792964	0.0817162	0.000977345	0.0326574	0.000813308
YBR053C	YBR053C	-0.987873	-0.447293	-0.683998	-0.216395	-0.535459	-0.830029	#NAME?	0.333623	0.558647	0.317729	0.78686	0.510666	0.243456	NA	-0.987873	-0.447293	-0.683998	-0.216395	-0.535459	-0.830029	-14.4423	0.333623	0.558647	0.317729	0.78686	0.510666	0.243456	0.0410904
YBR054W	YRO2	0.559537	-0.282893	-0.118182	0.615966	-1.09454	1.58835	1.45696	0.634227	0.830743	0.898651	0.499022	0.230293	0.0676102	0.0793353	0.559537	-0.282893	-0.118182	0.615966	-1.09454	1.58835	1.45696	0.634227	0.830743	0.898651	0.499022	0.230293	0.0676102	0.0793353
YBR056W	YBR056W	-1.47024	-0.15442	0.376224	-0.487856	-1.18126	0.0429627	-1.47972	0.00695461	0.806886	0.473609	0.352343	0.0222777	0.951855	0.0032099	-1.47024	-0.15442	0.376224	-0.487856	-1.18126	0.0429627	-1.47972	0.00695461	0.806886	0.473609	0.352343	0.0222777	0.951855	0.0032099
YBR057C	MUM2	-0.56336	#NAME?	-0.188631	#NAME?	#NAME?	#NAME?	#NAME?	0.428551	NA	0.775278	NA	NA	NA	NA	-0.56336	-9.20012	-0.188631	-8.22163	-8.56137	-7.86182	-11.7338	0.428551	0.0227885	0.775278	0.0301279	0.0478328	0.0320849	0.0211485
YBR058C	UBP14	-1.3577	-1.40535	-1.06987	-0.325417	-1.06373	0.247234	-1.10359	0.0119699	0.0224853	0.0334585	0.536778	0.0596937	0.671833	0.0201854	-1.3577	-1.40535	-1.06987	-0.325417	-1.06373	0.247234	-1.10359	0.0119699	0.0224853	0.0334585	0.536778	0.0596937	0.671833	0.0201854
YBR059C	AKL1	-1.4374	-1.01727	-0.519035	-0.587911	-0.952271	-0.21214	-0.874533	0.100187	0.252225	0.516586	0.464931	0.227695	0.829363	0.209615	-1.4374	-1.01727	-0.519035	-0.587911	-0.952271	-0.21214	-0.874533	0.100187	0.252225	0.516586	0.464931	0.227695	0.829363	0.209615
YBR061C	TRM7	0.0585611	0.114229	-0.474121	0.171325	0.126226	-0.124524	-0.237471	0.936143	0.85385	0.393975	0.835044	0.84183	0.858735	0.728591	0.0585611	0.114229	-0.474121	0.171325	0.126226	-0.124524	-0.237471	0.936143	0.85385	0.393975	0.835044	0.84183	0.858735	0.728591
YBR072W	HSP26	-1.75513	1.6902	4.45942	3.01565	-0.295458	5.33711	4.88686	8.60768e-06	2.8671e-05	1.2991e-10	1.48648e-08	0.300388	1.61462e-11	6.01084e-11	-1.75513	1.6902	4.45942	3.01565	-0.295458	5.33711	4.88686	8.60768e-06	2.8671e-05	1.2991e-10	1.48648e-08	0.300388	1.61462e-11	6.01084e-11
YBR074W	PFF1	0.594105	NA	NA	NA	NA	NA	NA	0.735166	NA	NA	NA	NA	NA	NA	0.594105	NA	NA	NA	NA	NA	NA	0.735166	NA	NA	NA	NA	NA	NA
YBR077C	SLM4	-0.117806	0.455424	-0.308051	-0.354569	-0.185332	-0.391525	0.239161	0.938398	0.609757	0.717565	0.685892	0.84081	0.671774	0.76565	-0.117806	0.455424	-0.308051	-0.354569	-0.185332	-0.391525	0.239161	0.938398	0.609757	0.717565	0.685892	0.84081	0.671774	0.76565
YBR078W	ECM33	-0.691184	-0.631478	-0.288571	-0.833118	-0.0873316	-0.204357	-1.06369	0.00270747	0.00695684	0.156753	0.000804722	0.699873	0.347354	4.03755e-05	-0.691184	-0.631478	-0.288571	-0.833118	-0.0873316	-0.204357	-1.06369	0.00270747	0.00695684	0.156753	0.000804722	0.699873	0.347354	4.03755e-05
YBR079C	RPG1	0.000793334	-0.017434	-0.704502	-0.615195	-0.344561	-0.523005	-1.17333	0.998426	0.967774	0.0275415	0.0576724	0.294038	0.106159	0.000613895	0.000793334	-0.017434	-0.704502	-0.615195	-0.344561	-0.523005	-1.17333	0.998426	0.967774	0.0275415	0.0576724	0.294038	0.106159	0.000613895
YBR080C	SEC18	-0.406607	-0.451468	-1.11631	-0.652223	-0.317186	0.334008	-1.33744	0.384418	0.339699	0.0131887	0.140831	0.499891	0.48891	0.00256386	-0.406607	-0.451468	-1.11631	-0.652223	-0.317186	0.334008	-1.33744	0.384418	0.339699	0.0131887	0.140831	0.499891	0.48891	0.00256386
YBR082C	UBC4	0.541938	-0.226557	-0.966289	-0.828359	-0.422667	0.272406	-0.779256	0.601339	0.851343	0.294446	0.392263	0.673564	0.819721	0.365113	0.541938	-0.226557	-0.966289	-0.828359	-0.422667	0.272406	-0.779256	0.601339	0.851343	0.294446	0.392263	0.673564	0.819721	0.365113
YBR084W	MIS1	-0.520125	-1.08675	-1.10632	-0.99127	-0.92386	-0.88979	-1.35037	0.0580497	0.000894822	0.000366845	0.00149049	0.00193928	0.00242592	4.48741e-05	-0.520125	-1.08675	-1.10632	-0.99127	-0.92386	-0.88979	-1.35037	0.0580497	0.000894822	0.000366845	0.00149049	0.00193928	0.00242592	4.48741e-05
YBR085C-A	YBR085C-A	-2.40581	-0.0151049	1.91893	-0.547177	-0.722157	1.12864	-0.0348751	0.0014532	0.98434	0.00254679	0.369261	0.229712	0.0576372	0.958797	-2.40581	-0.0151049	1.91893	-0.547177	-0.722157	1.12864	-0.0348751	0.0014532	0.98434	0.00254679	0.369261	0.229712	0.0576372	0.958797
YBR086C	IST2	-0.132975	-0.152039	-0.612875	-0.62393	0.366508	-0.571479	-0.643685	0.847239	0.826454	0.25966	0.262568	0.532133	0.319112	0.196069	-0.132975	-0.152039	-0.612875	-0.62393	0.366508	-0.571479	-0.643685	0.847239	0.826454	0.25966	0.262568	0.532133	0.319112	0.196069
YBR087W	RFC5	-0.884208	0.510172	0.0991101	-0.609066	1.30311	-0.316519	0.0838835	0.304505	0.532626	0.938326	0.428606	0.0809221	0.715279	0.918406	-0.884208	0.510172	0.0991101	-0.609066	1.30311	-0.316519	0.0838835	0.304505	0.532626	0.938326	0.428606	0.0809221	0.715279	0.918406
YBR088C	POL30	-0.795138	-0.375564	-0.375538	-0.422073	-0.499732	-0.821337	-1.41218	0.0033486	0.140494	0.119106	0.0886596	0.0438949	0.00233791	1.39051e-05	-0.795138	-0.375564	-0.375538	-0.422073	-0.499732	-0.821337	-1.41218	0.0033486	0.140494	0.119106	0.0886596	0.0438949	0.00233791	1.39051e-05
YBR089C-A	NHP6B	-1.45504	-0.655334	0.351316	0.0156756	-0.708783	0.38564	-0.960786	0.0174333	0.291518	0.56934	0.986769	0.237556	0.555121	0.0705293	-1.45504	-0.655334	0.351316	0.0156756	-0.708783	0.38564	-0.960786	0.0174333	0.291518	0.56934	0.986769	0.237556	0.555121	0.0705293
YBR092C	PHO3	-0.553785	-0.551317	-0.672025	-0.937127	-3.41962	-0.664392	-0.790749	0.389752	0.400876	0.263483	0.124971	9.44105e-05	0.293036	0.1503	-0.553785	-0.551317	-0.672025	-0.937127	-3.41962	-0.664392	-0.790749	0.389752	0.400876	0.263483	0.124971	9.44105e-05	0.293036	0.1503
YBR093C	PHO5	#NAME?	0.427494	-0.592294	-0.365374	-1.03214	3.79955	3.32443	NA	0.78721	0.727889	0.851271	0.543082	0.0183679	0.0182864	-7.03891	0.427494	-0.592294	-0.365374	-1.03214	3.79955	3.32443	0.0447044	0.78721	0.727889	0.851271	0.543082	0.0183679	0.0182864
YBR094W	PBY1	0.356137	-0.179382	0.0957635	0.441964	-0.858868	0.0676039	-1.18679	0.580834	0.804213	0.887509	0.467238	0.194366	0.931661	0.0477127	0.356137	-0.179382	0.0957635	0.441964	-0.858868	0.0676039	-1.18679	0.580834	0.804213	0.887509	0.467238	0.194366	0.931661	0.0477127
YBR095C	RXT2	0.27331	0.0406237	0.44804	0.929992	0.0829381	1.02818	0.00654791	0.653896	0.951051	0.354259	0.0612333	0.896719	0.0402625	0.99194	0.27331	0.0406237	0.44804	0.929992	0.0829381	1.02818	0.00654791	0.653896	0.951051	0.354259	0.0612333	0.896719	0.0402625	0.99194
YBR096W	YBR096W	-0.06408	0.672279	#NAME?	0.239827	0.539124	0.0933958	0.217325	0.961074	0.510565	NA	0.777374	0.459072	0.936884	0.814541	-0.06408	0.672279	-6.48127	0.239827	0.539124	0.0933958	0.217325	0.961074	0.510565	0.0348649	0.777374	0.459072	0.936884	0.814541
YBR101C	FES1	0.140874	-0.409035	-1.56373	-1.39111	0.214305	-0.197137	-1.48749	0.80275	0.419508	0.00198381	0.0066118	0.669201	0.723248	0.00179534	0.140874	-0.409035	-1.56373	-1.39111	0.214305	-0.197137	-1.48749	0.80275	0.419508	0.00198381	0.0066118	0.669201	0.723248	0.00179534
YBR102C	EXO84	-0.501643	-0.423535	-0.0200154	-0.537336	-0.150794	-1.23842	-0.318318	0.545598	0.618952	0.984851	0.498036	0.864611	0.105291	0.70187	-0.501643	-0.423535	-0.0200154	-0.537336	-0.150794	-1.23842	-0.318318	0.545598	0.618952	0.984851	0.498036	0.864611	0.105291	0.70187
YBR103W	SIF2	-0.907132	-0.942303	#NAME?	#NAME?	-0.855887	#NAME?	-1.4352	0.0701793	0.094321	NA	NA	0.0940769	NA	0.0286248	-0.907132	-0.942303	-9.78417	-8.15988	-0.855887	-7.80007	-1.4352	0.0701793	0.094321	0.0310386	0.0452371	0.0940769	0.0341171	0.0286248
YBR106W	PHO88	-0.0516988	-0.706287	-1.54109	-1.55835	0.215634	-0.41892	-1.7453	0.944979	0.206707	0.00559935	0.00743369	0.713596	0.468617	0.00147306	-0.0516988	-0.706287	-1.54109	-1.55835	0.215634	-0.41892	-1.7453	0.944979	0.206707	0.00559935	0.00743369	0.713596	0.468617	0.00147306
YBR108W	AIM3	-0.563005	0.0763081	0.078891	0.156566	-0.25784	-0.386336	-0.925042	0.180136	0.887378	0.866444	0.735155	0.549793	0.363602	0.0157405	-0.563005	0.0763081	0.078891	0.156566	-0.25784	-0.386336	-0.925042	0.180136	0.887378	0.866444	0.735155	0.549793	0.363602	0.0157405
YBR109C	CMD1	-0.435738	0.147252	-0.624304	-0.528282	0.129655	-0.711923	-0.281621	0.234863	0.724579	0.070956	0.13503	0.74427	0.0468994	0.389164	-0.435738	0.147252	-0.624304	-0.528282	0.129655	-0.711923	-0.281621	0.234863	0.724579	0.070956	0.13503	0.74427	0.0468994	0.389164
YBR111C	YSA1	-1.36824	-0.968156	0.493431	0.0583631	-1.0182	0.306798	-0.249659	0.0054578	0.0462962	0.272428	0.923389	0.0278673	0.545703	0.567157	-1.36824	-0.968156	0.493431	0.0583631	-1.0182	0.306798	-0.249659	0.0054578	0.0462962	0.272428	0.923389	0.0278673	0.545703	0.567157
YBR111W-A	SUS1	0.316643	#NAME?	#NAME?	#NAME?	-0.389871	#NAME?	0.40716	0.623637	NA	NA	NA	0.550555	NA	0.487447	0.316643	-9.29914	-9.94494	-8.32065	-0.389871	-7.96084	0.40716	0.623637	0.0217823	0.0144884	0.0481279	0.550555	0.0169007	0.487447
YBR112C	CYC8	-1.19981	-0.998757	-1.48137	-1.01094	-1.40924	-1.40117	-1.64729	0.12775	0.213647	0.0490976	0.187928	0.0659857	0.0698315	0.0211742	-1.19981	-0.998757	-1.48137	-1.01094	-1.40924	-1.40117	-1.64729	0.12775	0.213647	0.0490976	0.187928	0.0659857	0.0698315	0.0211742
YBR115C	LYS2	0.301845	0.371542	-0.580713	1.6558	1.28454	0.814527	0.634794	0.358428	0.259817	0.0591203	8.89724e-05	0.000521168	0.0124149	0.0280523	0.301845	0.371542	-0.580713	1.6558	1.28454	0.814527	0.634794	0.358428	0.259817	0.0591203	8.89724e-05	0.000521168	0.0124149	0.0280523
YBR117C	TKL2	-0.47327	-0.520512	4.92321	0.12212	-0.19872	1.07457	0.901789	0.251995	0.255643	1.04045e-07	0.812008	0.666461	0.0129325	0.0192476	-0.47327	-0.520512	4.92321	0.12212	-0.19872	1.07457	0.901789	0.251995	0.255643	1.04045e-07	0.812008	0.666461	0.0129325	0.0192476
YBR120C	CBP6	#NAME?	-1.77617	-1.4262	-1.46565	-1.67442	0.660161	-0.898037	NA	0.0194241	0.0332182	0.0518775	0.0711447	0.310043	0.262569	-12.3877	-1.77617	-1.4262	-1.46565	-1.67442	0.660161	-0.898037	0.0377581	0.0194241	0.0332182	0.0518775	0.0711447	0.310043	0.262569
YBR121C	GRS1	-0.216364	-0.363733	-0.440246	-0.423038	-0.353983	-0.224003	-0.736446	0.127994	0.0158676	0.00280422	0.00544142	0.0130978	0.108655	2.79502e-05	-0.216364	-0.363733	-0.440246	-0.423038	-0.353983	-0.224003	-0.736446	0.127994	0.0158676	0.00280422	0.00544142	0.0130978	0.108655	2.79502e-05
YBR122C	MRPL36	-0.602136	-1.03421	0.389872	0.363806	0.120028	0.675536	0.639271	0.417464	0.255643	0.553138	0.627324	0.870749	0.309426	0.415106	-0.602136	-1.03421	0.389872	0.363806	0.120028	0.675536	0.639271	0.417464	0.255643	0.553138	0.627324	0.870749	0.309426	0.415106
YBR123C	TFC1	0.47206	#NAME?	0.515063	#NAME?	0.868183	0.273323	#NAME?	0.75182	NA	0.708384	NA	0.548444	0.833759	NA	0.47206	-7.67273	0.515063	-6.69424	0.868183	0.273323	-10.2064	0.75182	0.023574	0.708384	0.0200877	0.548444	0.833759	0.0295035
YBR126C	TPS1	-2.0427	-0.887765	1.08972	-0.580722	-1.04312	0.391422	-0.970246	1.62811e-07	0.00142236	0.00013131	0.0180218	0.0002404	0.0969668	0.000231985	-2.0427	-0.887765	1.08972	-0.580722	-1.04312	0.391422	-0.970246	1.62811e-07	0.00142236	0.00013131	0.0180218	0.0002404	0.0969668	0.000231985
YBR126W-A	MEO1	#NAME?	#NAME?	#NAME?	#NAME?	#NAME?	0.593772	-2.46009	NA	NA	NA	NA	NA	0.537869	0.166142	-8.30934	-7.90561	-8.55142	-6.92712	-7.26687	0.593772	-2.46009	0.0426491	0.0275374	0.014289	0.0135743	0.020736	0.537869	0.166142
YBR127C	VMA2	-0.487599	-0.400269	0.118919	-0.243802	-0.397676	-0.185127	-0.548309	0.00631447	0.0253484	0.491717	0.141745	0.0193116	0.283087	0.00137105	-0.487599	-0.400269	0.118919	-0.243802	-0.397676	-0.185127	-0.548309	0.00631447	0.0253484	0.491717	0.141745	0.0193116	0.283087	0.00137105
YBR130C	SHE3	-0.255819	-0.558705	-0.586684	-0.429563	-0.999738	-0.63579	-0.550576	0.466649	0.0962428	0.0643747	0.185408	0.00412224	0.0525454	0.0604417	-0.255819	-0.558705	-0.586684	-0.429563	-0.999738	-0.63579	-0.550576	0.466649	0.0962428	0.0643747	0.185408	0.00412224	0.0525454	0.0604417
YBR135W	CKS1	0.106108	-0.269283	-0.258928	-0.226682	-0.182014	-0.701395	-0.456536	0.888842	0.702884	0.688186	0.739084	0.788696	0.250495	0.408118	0.106108	-0.269283	-0.258928	-0.226682	-0.182014	-0.701395	-0.456536	0.888842	0.702884	0.688186	0.739084	0.788696	0.250495	0.408118
YBR137W	YBR137W	#NAME?	-1.12661	-0.549761	-0.717902	-1.05027	-0.818867	-1.68177	NA	0.0545564	0.3053	0.187928	0.0569259	0.137756	0.00582935	-13.4233	-1.12661	-0.549761	-0.717902	-1.05027	-0.818867	-1.68177	0.0119374	0.0545564	0.3053	0.187928	0.0569259	0.137756	0.00582935
YBR139W	YBR139W	-0.546614	-0.378181	0.619111	0.465242	-0.128224	-0.203597	-0.213403	0.317458	0.513188	0.231193	0.392263	0.834611	0.748361	0.678585	-0.546614	-0.378181	0.619111	0.465242	-0.128224	-0.203597	-0.213403	0.317458	0.513188	0.231193	0.392263	0.834611	0.748361	0.678585
YBR140C	IRA1	-0.870313	-1.08462	-0.488957	-0.691647	-0.84195	0.0739288	-1.55834	0.234863	0.139445	0.503242	0.341726	0.24316	0.95841	0.0338908	-0.870313	-1.08462	-0.488957	-0.691647	-0.84195	0.0739288	-1.55834	0.234863	0.139445	0.503242	0.341726	0.24316	0.95841	0.0338908
YBR142W	MAK5	-0.539317	-0.144715	-1.68161	-0.481749	-0.845781	-0.55741	-3.51855	0.753178	0.943158	0.242986	0.7764	0.583967	0.751021	0.0610772	-0.539317	-0.144715	-1.68161	-0.481749	-0.845781	-0.55741	-3.51855	0.753178	0.943158	0.242986	0.7764	0.583967	0.751021	0.0610772
YBR143C	SUP45	-0.557684	-0.747882	-0.763711	-0.821424	-1.01347	-1.13105	-1.28336	0.00962874	0.0016999	0.0007593	0.000708237	7.49389e-05	2.12001e-05	4.65387e-06	-0.557684	-0.747882	-0.763711	-0.821424	-1.01347	-1.13105	-1.28336	0.00962874	0.0016999	0.0007593	0.000708237	7.49389e-05	2.12001e-05	4.65387e-06
YBR146W	MRPS9	#NAME?	-1.14924	-0.913736	-1.15019	-1.10987	0.799973	-1.08935	NA	0.345927	0.306737	0.327269	0.346504	0.341168	0.2926	-11.5813	-1.14924	-0.913736	-1.15019	-1.10987	0.799973	-1.08935	0.0192931	0.345927	0.306737	0.327269	0.346504	0.341168	0.2926
YBR149W	ARA1	-1.52075	-0.798275	0.610596	-0.33288	-0.95489	-0.201138	-0.7464	0.000137735	0.0200078	0.0499057	0.303354	0.00486318	0.572059	0.0130365	-1.52075	-0.798275	0.610596	-0.33288	-0.95489	-0.201138	-0.7464	0.000137735	0.0200078	0.0499057	0.303354	0.00486318	0.572059	0.0130365
YBR151W	APD1	-0.580593	-0.147708	0.368967	-0.471777	0.483755	0.496549	0.396369	0.498746	0.888024	0.666869	0.579093	0.563012	0.576393	0.602948	-0.580593	-0.147708	0.368967	-0.471777	0.483755	0.496549	0.396369	0.498746	0.888024	0.666869	0.579093	0.563012	0.576393	0.602948
YBR154C	RPB5	-0.1971	-0.419493	-0.685576	-0.966015	-0.873705	-1.00923	-1.20937	0.639127	0.289767	0.0611543	0.014649	0.0218811	0.00977686	0.00155725	-0.1971	-0.419493	-0.685576	-0.966015	-0.873705	-1.00923	-1.20937	0.639127	0.289767	0.0611543	0.014649	0.0218811	0.00977686	0.00155725
YBR155W	CNS1	-0.377062	-0.812044	-1.43863	-0.734514	-0.498098	-0.921294	-1.02657	0.474356	0.107426	0.00478317	0.131835	0.319683	0.0605179	0.0232351	-0.377062	-0.812044	-1.43863	-0.734514	-0.498098	-0.921294	-1.02657	0.474356	0.107426	0.00478317	0.131835	0.319683	0.0605179	0.0232351
YBR159W	IFA38	-0.397436	-0.176733	-1.23805	-0.378939	0.243315	-1.14549	-1.01119	0.816887	0.920369	0.49887	0.860536	0.87241	0.461259	0.542065	-0.397436	-0.176733	-1.23805	-0.378939	0.243315	-1.14549	-1.01119	0.816887	0.920369	0.49887	0.860536	0.87241	0.461259	0.542065
YBR160W	CDC28	-1.17438	-0.219266	-0.640194	-1.14176	-1.52469	-1.14968	-1.53249	0.0687723	0.778763	0.306167	0.0720363	0.018401	0.0714163	0.0110091	-1.17438	-0.219266	-0.640194	-1.14176	-1.52469	-1.14968	-1.53249	0.0687723	0.778763	0.306167	0.0720363	0.018401	0.0714163	0.0110091
YBR162C	TOS1	-0.67846	0.00458934	0.253647	-0.648697	-0.0173411	-0.649998	-0.781153	0.176825	0.993247	0.624886	0.182593	0.973208	0.187277	0.0756276	-0.67846	0.00458934	0.253647	-0.648697	-0.0173411	-0.649998	-0.781153	0.176825	0.993247	0.624886	0.182593	0.973208	0.187277	0.0756276
YBR164C	ARL1	-0.00591474	0.362911	-0.378487	0.626896	0.593829	-0.102394	-0.860184	0.995828	0.667622	0.624289	0.404362	0.430114	0.918993	0.188779	-0.00591474	0.362911	-0.378487	0.626896	0.593829	-0.102394	-0.860184	0.995828	0.667622	0.624289	0.404362	0.430114	0.918993	0.188779
YBR166C	TYR1	#NAME?	-0.19543	-0.308309	#NAME?	0.0358878	-0.339155	#NAME?	NA	0.81696	0.677056	NA	0.951056	0.673193	NA	-11.4466	-0.19543	-0.308309	-10.0644	0.0358878	-0.339155	-13.5766	0.0429479	0.81696	0.677056	0.0323017	0.951056	0.673193	0.0118815
YBR169C	SSE2	-2.20619	0.0183202	2.42662	-0.108926	-1.52598	1.10689	0.796987	0.000945784	0.972826	1.62902e-05	0.814969	0.00100404	0.00834951	0.0286285	-2.20619	0.0183202	2.42662	-0.108926	-1.52598	1.10689	0.796987	0.000945784	0.972826	1.62902e-05	0.814969	0.00100404	0.00834951	0.0286285
YBR170C	NPL4	-1.42979	-0.952653	-0.564153	-0.352076	-0.983449	0.615887	-0.49633	0.0216988	0.124291	0.345623	0.584725	0.100038	0.32246	0.367796	-1.42979	-0.952653	-0.564153	-0.352076	-0.983449	0.615887	-0.49633	0.0216988	0.124291	0.345623	0.584725	0.100038	0.32246	0.367796
YBR171W	SEC66	-1.08249	0.826766	-1.40958	-1.76815	1.15471	-0.698589	-1.97815	0.253392	0.40108	0.114994	0.0554461	0.214398	0.480838	0.0205027	-1.08249	0.826766	-1.40958	-1.76815	1.15471	-0.698589	-1.97815	0.253392	0.40108	0.114994	0.0554461	0.214398	0.480838	0.0205027
YBR172C	SMY2	-0.231114	0.140685	-0.676375	0.757053	-0.15573	0.0936321	-1.27838	0.866	0.924293	0.550617	0.508946	0.914745	0.951701	0.192743	-0.231114	0.140685	-0.676375	0.757053	-0.15573	0.0936321	-1.27838	0.866	0.924293	0.550617	0.508946	0.914745	0.951701	0.192743
YBR173C	UMP1	#NAME?	1.54481	#NAME?	#NAME?	#NAME?	-0.469797	#NAME?	NA	0.0915269	NA	NA	NA	0.291122	NA	-9.86635	1.54481	-10.1084	-8.48413	-8.82387	-0.469797	-11.9963	0.0357164	0.0915269	0.0189046	0.0420469	0.0330767	0.291122	0.0464049
YBR176W	ECM31	1.29913	-0.106679	0.0532115	0.437123	0.810529	0.533556	0.532648	0.247595	0.938538	0.968121	0.682149	0.474451	0.630768	0.562328	1.29913	-0.106679	0.0532115	0.437123	0.810529	0.533556	0.532648	0.247595	0.938538	0.968121	0.682149	0.474451	0.630768	0.562328
YBR177C	EHT1	-0.702762	-0.764844	-0.771231	-0.448558	-0.794729	0.752513	-1.08097	0.0310118	0.0247409	0.0159543	0.15535	0.0146461	0.0202642	0.00106633	-0.702762	-0.764844	-0.771231	-0.448558	-0.794729	0.752513	-1.08097	0.0310118	0.0247409	0.0159543	0.15535	0.0146461	0.0202642	0.00106633
YBR189W	RPS9B	-0.433756	-1.33132	-0.169946	-0.0967363	-0.336395	-0.194411	-0.600397	0.735166	0.246078	0.905399	0.95119	0.788506	0.894213	0.562853	-0.433756	-1.33132	-0.169946	-0.0967363	-0.336395	-0.194411	-0.600397	0.735166	0.246078	0.905399	0.95119	0.788506	0.894213	0.562853
YBR191W	RPL21A	0.78803	1.43068	0.188205	0.352186	0.824	0.22712	0.403101	0.33045	0.0789947	0.826972	0.682149	0.298734	0.818725	0.588916	0.78803	1.43068	0.188205	0.352186	0.824	0.22712	0.403101	0.33045	0.0789947	0.826972	0.682149	0.298734	0.818725	0.588916
YBR195C	MSI1	-0.629254	-0.433237	-0.543399	-0.231246	#NAME?	0.677758	-0.773561	0.521547	0.6364	0.516432	0.808505	NA	0.427216	0.348927	-0.629254	-0.433237	-0.543399	-0.231246	-11.1735	0.677758	-0.773561	0.521547	0.6364	0.516432	0.808505	0.0373348	0.427216	0.348927
YBR196C	PGI1	-0.24573	0.110231	-0.133569	-0.20538	-0.0369885	0.813285	0.284114	0.257264	0.648467	0.542723	0.342484	0.880976	0.000692884	0.132438	-0.24573	0.110231	-0.133569	-0.20538	-0.0369885	0.813285	0.284114	0.257264	0.648467	0.542723	0.342484	0.880976	0.000692884	0.132438
YBR198C	TAF5	-0.254246	-0.712782	-1.13413	-0.830656	-0.981549	-0.667289	-1.12691	0.623986	0.139445	0.0174976	0.0767587	0.0380785	0.156167	0.0601008	-0.254246	-0.712782	-1.13413	-0.830656	-0.981549	-0.667289	-1.12691	0.623986	0.139445	0.0174976	0.0767587	0.0380785	0.156167	0.0601008
YBR200W	BEM1	-1.12175	-1.4997	-1.33618	-1.37138	-0.527878	-0.558817	-0.866432	0.225731	0.0513712	0.0363147	0.0385218	0.417517	0.39861	0.173457	-1.12175	-1.4997	-1.33618	-1.37138	-0.527878	-0.558817	-0.866432	0.225731	0.0513712	0.0363147	0.0385218	0.417517	0.39861	0.173457
YBR202W	MCM7	-1.04458	-0.861823	-0.696003	-0.324474	1.28988	-0.753924	-1.00895	0.208193	0.17147	0.231378	0.702042	0.118448	0.213156	0.161883	-1.04458	-0.861823	-0.696003	-0.324474	1.28988	-0.753924	-1.00895	0.208193	0.17147	0.231378	0.702042	0.118448	0.213156	0.161883
YBR205W	KTR3	-0.213547	-0.134378	-0.866132	-0.894012	-0.377975	-1.02754	-1.06933	0.691976	0.821749	0.0611543	0.09152	0.43892	0.0325092	0.0165984	-0.213547	-0.134378	-0.866132	-0.894012	-0.377975	-1.02754	-1.06933	0.691976	0.821749	0.0611543	0.09152	0.43892	0.0325092	0.0165984
YBR208C	DUR1,2	-0.0741611	0.577539	0.126835	0.313377	3.69112	0.391048	0.580064	0.893228	0.203232	0.789753	0.494467	4.09517e-07	0.392861	0.137805	-0.0741611	0.577539	0.126835	0.313377	3.69112	0.391048	0.580064	0.893228	0.203232	0.789753	0.494467	4.09517e-07	0.392861	0.137805
YBR212W	NGR1	#NAME?	-1.13714	0.0978024	-1.14827	-1.58151	-0.302092	-1.48767	NA	0.377956	0.940859	0.295173	0.195713	0.82537	0.128878	-11.6441	-1.13714	0.0978024	-1.14827	-1.58151	-0.302092	-1.48767	0.0329875	0.377956	0.940859	0.295173	0.195713	0.82537	0.128878
YBR214W	SDS24	-1.94911	-1.38651	0.302252	-0.463196	-0.97002	-1.22579	-0.883055	0.101635	0.200671	0.78969	0.687238	0.366353	0.248371	0.352626	-1.94911	-1.38651	0.302252	-0.463196	-0.97002	-1.22579	-0.883055	0.101635	0.200671	0.78969	0.687238	0.366353	0.248371	0.352626
YBR215W	HPC2	#NAME?	#NAME?	#NAME?	#NAME?	#NAME?	#NAME?	#NAME?	NA	NA	NA	NA	NA	NA	NA	-7.99061	-7.58688	-8.23269	-6.60839	-6.94814	-6.24858	-10.1206	0.0317393	0.0207235	0.0286111	0.0353742	0.0120233	0.0329882	0.011275
YBR218C	PYC2	0.209214	-0.710116	-0.155884	1.11911	0.587376	0.820956	-0.0302984	0.638259	0.0862735	0.716658	0.00885661	0.139702	0.04063	0.945901	0.209214	-0.710116	-0.155884	1.11911	0.587376	0.820956	-0.0302984	0.638259	0.0862735	0.716658	0.00885661	0.139702	0.04063	0.945901
YBR221C	PDB1	-0.836761	-0.430679	-0.184164	-0.403309	-0.501997	0.0262918	-0.407681	0.00164242	0.0819936	0.44596	0.0888854	0.0347454	0.933921	0.0566902	-0.836761	-0.430679	-0.184164	-0.403309	-0.501997	0.0262918	-0.407681	0.00164242	0.0819936	0.44596	0.0888854	0.0347454	0.933921	0.0566902
YBR222C	PCS60	-0.24391	-0.100181	-0.682672	-0.465612	0.0196457	0.979157	-0.898225	0.753183	0.915956	0.292082	0.500834	0.978677	0.139153	0.129825	-0.24391	-0.100181	-0.682672	-0.465612	0.0196457	0.979157	-0.898225	0.753183	0.915956	0.292082	0.500834	0.978677	0.139153	0.129825
YBR227C	MCX1	-0.553444	-0.784191	-1.35629	-0.63697	0.206133	-0.660924	-0.466397	0.56733	0.353199	0.126339	0.59119	0.839053	0.42896	0.664008	-0.553444	-0.784191	-1.35629	-0.63697	0.206133	-0.660924	-0.466397	0.56733	0.353199	0.126339	0.59119	0.839053	0.42896	0.664008
YBR229C	ROT2	-0.323742	-0.0379155	0.144116	-0.736666	0.20004	-0.517561	-0.614384	0.7022	0.969923	0.864959	0.327269	0.814005	0.522988	0.361908	-0.323742	-0.0379155	0.144116	-0.736666	0.20004	-0.517561	-0.614384	0.7022	0.969923	0.864959	0.327269	0.814005	0.522988	0.361908
YBR230C	OM14	-2.84808	-1.69387	-0.172347	-0.909507	-1.82153	-0.0926883	-0.565205	0.000162335	0.00835774	0.775263	0.135114	0.00611858	0.899116	0.258521	-2.84808	-1.69387	-0.172347	-0.909507	-1.82153	-0.0926883	-0.565205	0.000162335	0.00835774	0.775263	0.135114	0.00611858	0.899116	0.258521
YBR231C	SWC5	#NAME?	#NAME?	#NAME?	#NAME?	#NAME?	#NAME?	#NAME?	NA	NA	NA	NA	NA	NA	NA	-9.79857	-9.39484	-10.0406	-8.41635	-8.7561	-8.05654	-11.9285	0.045157	0.0219301	0.0241922	0.0264222	0.0399841	0.0431771	0.0294548
YBR233W-A	DAD3	-0.655933	-0.280253	-0.934026	-0.441326	-0.0695819	-0.833322	-0.565605	0.503771	0.80361	0.245097	0.655926	0.944455	0.322709	0.503297	-0.655933	-0.280253	-0.934026	-0.441326	-0.0695819	-0.833322	-0.565605	0.503771	0.80361	0.245097	0.655926	0.944455	0.322709	0.503297
YBR234C	ARC40	-0.343384	-0.246388	-1.01237	-0.952877	-0.364568	-0.594989	-1.33364	0.277034	0.457063	0.00201936	0.0045472	0.24184	0.0537291	0.000145289	-0.343384	-0.246388	-1.01237	-0.952877	-0.364568	-0.594989	-1.33364	0.277034	0.457063	0.00201936	0.0045472	0.24184	0.0537291	0.000145289
YBR236C	ABD1	-0.759144	-1.20507	-1.38361	-1.44856	-1.6678	-0.660411	-2.10909	0.230044	0.0612576	0.0234431	0.0222188	0.00875334	0.296246	0.000967588	-0.759144	-1.20507	-1.38361	-1.44856	-1.6678	-0.660411	-2.10909	0.230044	0.0612576	0.0234431	0.0222188	0.00875334	0.296246	0.000967588
YBR242W	YBR242W	-0.13374	#NAME?	-0.0649264	#NAME?	-0.431138	-1.01709	-0.586073	0.89733	NA	0.959974	NA	0.599558	0.378887	0.553921	-0.13374	-5.73361	-0.0649264	-4.75512	-0.431138	-1.01709	-0.586073	0.89733	0.0384712	0.959974	0.0202951	0.599558	0.378887	0.553921
YBR244W	GPX2	-0.155783	0.736959	-0.412129	-1.06079	0.489706	-0.65227	-0.693243	0.742405	0.0792028	0.295734	0.0128539	0.230608	0.105488	0.0557407	-0.155783	0.736959	-0.412129	-1.06079	0.489706	-0.65227	-0.693243	0.742405	0.0792028	0.295734	0.0128539	0.230608	0.105488	0.0557407
YBR245C	ISW1	-0.345916	0.528878	-0.402357	-0.565528	-0.335431	-0.929522	-0.973642	0.44255	0.225669	0.33335	0.175711	0.439823	0.0287132	0.0138388	-0.345916	0.528878	-0.402357	-0.565528	-0.335431	-0.929522	-0.973642	0.44255	0.225669	0.33335	0.175711	0.439823	0.0287132	0.0138388
YBR246W	RRT2	-1.20831	-1.49065	-1.15985	NA	NA	-1.59903	NA	0.253392	0.182604	0.245022	NA	NA	0.149374	NA	-1.20831	-1.49065	-1.15985	NA	NA	-1.59903	NA	0.253392	0.182604	0.245022	NA	NA	0.149374	NA
YBR247C	ENP1	-0.927971	-1.45091	-2.38765	-2.31408	-0.925525	-0.998698	-1.91578	0.161774	0.0368618	0.00100081	0.00410984	0.150472	0.124866	0.00300986	-0.927971	-1.45091	-2.38765	-2.31408	-0.925525	-0.998698	-1.91578	0.161774	0.0368618	0.00100081	0.00410984	0.150472	0.124866	0.00300986
YBR248C	HIS7	-0.732017	-0.112614	-0.414658	0.801108	0.634914	0.00781286	0.0901552	0.00939915	0.719818	0.107903	0.00570162	0.0186989	0.983993	0.733877	-0.732017	-0.112614	-0.414658	0.801108	0.634914	0.00781286	0.0901552	0.00939915	0.719818	0.107903	0.00570162	0.0186989	0.983993	0.733877
YBR249C	ARO4	-0.0700157	-0.243799	-0.509615	1.4014	0.340704	-0.0596439	0.178717	0.75901	0.225133	0.00954713	2.09071e-06	0.0754459	0.806403	0.308681	-0.0700157	-0.243799	-0.509615	1.4014	0.340704	-0.0596439	0.178717	0.75901	0.225133	0.00954713	2.09071e-06	0.0754459	0.806403	0.308681
YBR251W	MRPS5	-0.877351	-1.39638	0.515351	-0.144782	-0.620748	1.04596	-0.49294	0.444998	0.215132	0.651315	0.905209	0.581376	0.292371	0.588916	-0.877351	-1.39638	0.515351	-0.144782	-0.620748	1.04596	-0.49294	0.444998	0.215132	0.651315	0.905209	0.581376	0.292371	0.588916
YBR252W	DUT1	-0.346193	-0.554356	-0.174767	-0.405106	-0.876135	-0.364192	-0.752551	0.474356	0.237423	0.717588	0.383699	0.0505227	0.447717	0.0628864	-0.346193	-0.554356	-0.174767	-0.405106	-0.876135	-0.364192	-0.752551	0.474356	0.237423	0.717588	0.383699	0.0505227	0.447717	0.0628864
YBR253W	SRB6	-0.357317	0.194006	#NAME?	0.33275	0.0384807	0.659616	#NAME?	0.738446	0.831861	NA	0.747573	0.965495	0.545679	NA	-0.357317	0.194006	-10.4061	0.33275	0.0384807	0.659616	-12.294	0.738446	0.831861	0.0135681	0.747573	0.965495	0.545679	0.039598
YBR256C	RIB5	-1.07009	0.258333	-0.378594	1.17191	0.0614461	-0.0669326	0.901155	0.0721039	0.710641	0.533761	0.0482205	0.927798	0.932451	0.0875599	-1.07009	0.258333	-0.378594	1.17191	0.0614461	-0.0669326	0.901155	0.0721039	0.710641	0.533761	0.0482205	0.927798	0.932451	0.0875599
YBR258C	SHG1	-0.467684	0.327015	-0.140366	0.116304	-0.0616804	0.235275	0.933494	0.665561	0.713243	0.867923	0.925873	0.951485	0.801428	0.303918	-0.467684	0.327015	-0.140366	0.116304	-0.0616804	0.235275	0.933494	0.665561	0.713243	0.867923	0.925873	0.951485	0.801428	0.303918
YBR261C	TAE1	-1.11388	-0.486118	-0.77098	-1.7444	-0.44798	-0.595572	-0.584429	0.192243	0.600592	0.40695	0.0394033	0.606497	0.510262	0.442421	-1.11388	-0.486118	-0.77098	-1.7444	-0.44798	-0.595572	-0.584429	0.192243	0.600592	0.40695	0.0394033	0.606497	0.510262	0.442421
YBR262C	MIC12	0.271852	-0.840307	-0.534274	-0.349076	-0.244252	2.20865	0.341219	0.923794	0.653748	0.824611	0.861819	0.924127	0.192956	0.839326	0.271852	-0.840307	-0.534274	-0.349076	-0.244252	2.20865	0.341219	0.923794	0.653748	0.824611	0.861819	0.924127	0.192956	0.839326
YBR263W	SHM1	-0.169709	-0.169562	-0.192786	-0.619808	-0.255373	-0.113084	-0.519579	0.488317	0.496264	0.399339	0.0109359	0.270479	0.671321	0.0152987	-0.169709	-0.169562	-0.192786	-0.619808	-0.255373	-0.113084	-0.519579	0.488317	0.496264	0.399339	0.0109359	0.270479	0.671321	0.0152987
YBR264C	YPT10	0.997168	-0.313216	-0.193668	#NAME?	1.1794	#NAME?	0.948923	0.296905	0.707152	0.751271	NA	0.243001	NA	0.245267	0.997168	-0.313216	-0.193668	-8.0821	1.1794	-7.72229	0.948923	0.296905	0.707152	0.751271	0.0180109	0.243001	0.0429633	0.245267
YBR265W	TSC10	-0.278857	-0.241495	#NAME?	#NAME?	#NAME?	#NAME?	#NAME?	0.67237	0.799858	NA	NA	NA	NA	NA	-0.278857	-0.241495	-10.3232	-8.69887	-9.03862	-8.33906	-12.211	0.67237	0.799858	0.0125681	0.0404049	0.0347272	0.0422983	0.027744
YBR267W	REI1	-0.181312	-1.03953	-1.02298	-0.994657	-0.142803	-1.24669	-1.48197	0.860159	0.278434	0.254506	0.237175	0.881494	0.139153	0.0519687	-0.181312	-1.03953	-1.02298	-0.994657	-0.142803	-1.24669	-1.48197	0.860159	0.278434	0.254506	0.237175	0.881494	0.139153	0.0519687
YBR268W	MRPL37	-0.515649	-1.21208	-0.147633	-0.471911	-1.46043	0.572523	-0.218222	0.411961	0.121173	0.799769	0.444181	0.026348	0.355304	0.675415	-0.515649	-1.21208	-0.147633	-0.471911	-1.46043	0.572523	-0.218222	0.411961	0.121173	0.799769	0.444181	0.026348	0.355304	0.675415
YBR269C	SDH8	-0.633382	-1.41516	0.898401	-0.287518	-1.10821	2.1645	1.35743	0.549091	0.163861	0.182593	0.704261	0.152327	0.00601173	0.0361104	-0.633382	-1.41516	0.898401	-0.287518	-1.10821	2.1645	1.35743	0.549091	0.163861	0.182593	0.704261	0.152327	0.00601173	0.0361104
YBR272C	HSM3	-1.2251	-0.23687	-1.60829	#NAME?	-0.0894381	-0.914964	-1.0924	0.129428	0.80431	0.0409294	NA	0.921875	0.30064	0.122542	-1.2251	-0.23687	-1.60829	-8.30878	-0.0894381	-0.914964	-1.0924	0.129428	0.80431	0.0409294	0.0369938	0.921875	0.30064	0.122542
YBR273C	UBX7	-0.956663	-1.30429	-1.22851	-0.731672	#NAME?	-1.02066	-1.39426	0.283939	0.147359	0.3053	0.462817	NA	0.24778	0.0774862	-0.956663	-1.30429	-1.22851	-0.731672	-10.7986	-1.02066	-1.39426	0.283939	0.147359	0.3053	0.462817	0.0338159	0.24778	0.0774862
YBR279W	PAF1	-0.218304	-0.478048	-0.619744	-0.837238	-0.393937	-0.702535	-0.969152	0.672574	0.320277	0.161155	0.0661092	0.402776	0.124805	0.0214169	-0.218304	-0.478048	-0.619744	-0.837238	-0.393937	-0.702535	-0.969152	0.672574	0.320277	0.161155	0.0661092	0.402776	0.124805	0.0214169
YBR281C	DUG2	0.53668	0.175174	-0.704333	0.447619	0.663949	0.160117	0.0164687	0.505677	0.853814	0.399334	0.574261	0.389931	0.864958	0.986603	0.53668	0.175174	-0.704333	0.447619	0.663949	0.160117	0.0164687	0.505677	0.853814	0.399334	0.574261	0.389931	0.864958	0.986603
YBR283C	SSH1	-1.7843	-3.24349	-4.61733	-3.31	-1.24298	-2.67756	-4.84218	0.298666	0.092251	0.00724511	0.049405	0.474214	0.109107	0.0033931	-1.7843	-3.24349	-4.61733	-3.31	-1.24298	-2.67756	-4.84218	0.298666	0.092251	0.00724511	0.049405	0.474214	0.109107	0.0033931
YBR286W	APE3	-0.741937	-0.521164	0.756341	-0.0457877	-0.640645	-0.725954	-1.14534	0.00860285	0.061551	0.00577472	0.894241	0.0177957	0.00874179	0.000155838	-0.741937	-0.521164	0.756341	-0.0457877	-0.640645	-0.725954	-1.14534	0.00860285	0.061551	0.00577472	0.894241	0.0177957	0.00874179	0.000155838
YBR288C	APM3	-0.35644	-0.488885	-1.44928	-1.01156	-0.364845	-0.102878	-0.955146	0.715226	0.558647	0.0853986	0.24043	0.648902	0.927383	0.212115	-0.35644	-0.488885	-1.44928	-1.01156	-0.364845	-0.102878	-0.955146	0.715226	0.558647	0.0853986	0.24043	0.648902	0.927383	0.212115
YBR289W	SNF5	0.156243	-0.483426	0.570538	0.828478	-0.793409	-0.331954	-0.258378	0.840268	0.482841	0.369172	0.154968	0.339678	0.64801	0.672885	0.156243	-0.483426	0.570538	0.828478	-0.793409	-0.331954	-0.258378	0.840268	0.482841	0.369172	0.154968	0.339678	0.64801	0.672885
YCL005W-A	VMA9	-0.13224	0.00305472	-0.337644	-0.190292	1.56716	0.1723	-0.546106	0.815237	0.994926	0.533761	0.717556	0.00289537	0.792433	0.196456	-0.13224	0.00305472	-0.337644	-0.190292	1.56716	0.1723	-0.546106	0.815237	0.994926	0.533761	0.717556	0.00289537	0.792433	0.196456
YCL009C	ILV6	-0.389819	-0.253504	-0.313765	0.818754	0.113362	0.0205763	0.299648	0.027616	0.151942	0.0611543	0.000200616	0.532423	0.929842	0.0535143	-0.389819	-0.253504	-0.313765	0.818754	0.113362	0.0205763	0.299648	0.027616	0.151942	0.0611543	0.000200616	0.532423	0.929842	0.0535143
YCL011C	GBP2	-0.728529	-0.719247	-0.384028	-1.20859	-0.917472	-0.960299	-1.15012	0.14962	0.156428	0.444852	0.0188597	0.0614577	0.0531547	0.0133517	-0.728529	-0.719247	-0.384028	-1.20859	-0.917472	-0.960299	-1.15012	0.14962	0.156428	0.444852	0.0188597	0.0614577	0.0531547	0.0133517
YCL014W	BUD3	#NAME?	0.0936348	0.216096	-0.586295	#NAME?	-0.613773	0.110573	NA	0.921892	0.782681	0.413701	NA	0.486158	0.880863	-9.49751	0.0936348	0.216096	-0.586295	-8.45504	-0.613773	0.110573	0.0210758	0.921892	0.782681	0.413701	0.0217134	0.486158	0.880863
YCL016C	DCC1	-0.252179	-0.178846	-0.212086	#NAME?	0.702198	-0.459356	#NAME?	0.6745	0.778763	0.648	NA	0.199252	0.447478	NA	-0.252179	-0.178846	-0.212086	-7.74652	0.702198	-0.459356	-11.2587	0.6745	0.778763	0.648	0.0313253	0.199252	0.447478	0.0427353
YCL017C	NFS1	-1.6414	-1.94673	-0.588276	-1.55206	-0.874707	0.0404079	-1.04146	0.0103346	0.00467773	0.326402	0.0148964	0.148168	0.959521	0.0566557	-1.6414	-1.94673	-0.588276	-1.55206	-0.874707	0.0404079	-1.04146	0.0103346	0.00467773	0.326402	0.0148964	0.148168	0.959521	0.0566557
YCL018W	LEU2	-2.11055	4.31021	-0.588189	-1.34701	6.07783	0.84802	0.336079	0.00448271	2.6781e-05	0.386248	0.0499611	4.09517e-07	0.21716	0.604878	-2.11055	4.31021	-0.588189	-1.34701	6.07783	0.84802	0.336079	0.00448271	2.6781e-05	0.386248	0.0499611	4.09517e-07	0.21716	0.604878
YCL026C-B	HBN1	-0.931844	1.46094	-0.620963	-0.504665	1.74661	1.42165	1.63947	0.359553	0.127042	0.515025	0.607463	0.0608151	0.128348	0.0519687	-0.931844	1.46094	-0.620963	-0.504665	1.74661	1.42165	1.63947	0.359553	0.127042	0.515025	0.607463	0.0608151	0.128348	0.0519687
YCL028W	RNQ1	-0.531665	-0.11214	0.276091	0.363693	-0.181697	-0.196333	0.275025	0.17798	0.815475	0.487013	0.357522	0.656741	0.659785	0.437957	-0.531665	-0.11214	0.276091	0.363693	-0.181697	-0.196333	0.275025	0.17798	0.815475	0.487013	0.357522	0.656741	0.659785	0.437957
YCL029C	BIK1	#NAME?	0.811519	#NAME?	-0.385028	-0.64929	#NAME?	#NAME?	NA	0.447555	NA	0.773504	0.601836	NA	NA	-13.5806	0.811519	-13.8227	-0.385028	-0.64929	-11.8386	-15.7105	0.0259115	0.447555	0.01463	0.773504	0.601836	0.010955	0.0167653
YCL030C	HIS4	0.139423	1.22754	-0.205858	2.9586	1.72993	-0.493818	2.93174	0.587156	8.81782e-05	0.374564	1.58433e-09	1.34267e-06	0.0349715	2.95103e-09	0.139423	1.22754	-0.205858	2.9586	1.72993	-0.493818	2.93174	0.587156	8.81782e-05	0.374564	1.58433e-09	1.34267e-06	0.0349715	2.95103e-09
YCL031C	RRP7	-0.0362594	0.0768063	0.190396	0.782227	0.396426	0.2754	-0.655461	0.969483	0.922259	0.762439	0.184354	0.649449	0.786806	0.214248	-0.0362594	0.0768063	0.190396	0.782227	0.396426	0.2754	-0.655461	0.969483	0.922259	0.762439	0.184354	0.649449	0.786806	0.214248
YCL032W	STE50	0.414598	0.0849837	0.104442	-0.0183561	#NAME?	-0.780879	#NAME?	0.411741	0.886302	0.837416	0.970165	NA	0.0681202	NA	0.414598	0.0849837	0.104442	-0.0183561	-5.76196	-0.780879	-8.93438	0.411741	0.886302	0.837416	0.970165	0.0318249	0.0681202	0.011769
YCL033C	MXR2	-1.21925	-0.286314	0.987693	-0.516105	-0.258359	1.79906	1.07728	0.129274	0.763719	0.197407	0.531437	0.773813	0.0244191	0.127175	-1.21925	-0.286314	0.987693	-0.516105	-0.258359	1.79906	1.07728	0.129274	0.763719	0.197407	0.531437	0.773813	0.0244191	0.127175
YCL034W	LSB5	-1.23065	-0.638219	-0.266492	-0.338521	-1.27352	-0.943633	-0.833496	0.125801	0.449218	0.7521	0.696498	0.103288	0.294966	0.29233	-1.23065	-0.638219	-0.266492	-0.338521	-1.27352	-0.943633	-0.833496	0.125801	0.449218	0.7521	0.696498	0.103288	0.294966	0.29233
YCL035C	GRX1	-0.783826	0.688965	1.45654	0.160815	-0.751185	1.09243	0.725759	0.0305387	0.0637518	0.000357441	0.681165	0.0339242	0.00374939	0.0255263	-0.783826	0.688965	1.45654	0.160815	-0.751185	1.09243	0.725759	0.0305387	0.0637518	0.000357441	0.681165	0.0339242	0.00374939	0.0255263
YCL037C	SRO9	-0.43518	-1.35765	-1.95376	-1.69431	-0.626754	-1.92635	-1.81621	0.0748582	4.82323e-05	3.72576e-07	2.56344e-06	0.0114059	3.20564e-07	9.69766e-07	-0.43518	-1.35765	-1.95376	-1.69431	-0.626754	-1.92635	-1.81621	0.0748582	4.82323e-05	3.72576e-07	2.56344e-06	0.0114059	3.20564e-07	9.69766e-07
YCL039W	GID7	-1.68747	-1.25791	-1.45205	-1.04933	-1.17006	#NAME?	-0.064401	0.00984163	0.044949	0.025444	0.0706682	0.0653011	NA	0.924022	-1.68747	-1.25791	-1.45205	-1.04933	-1.17006	-10.4853	-0.064401	0.00984163	0.044949	0.025444	0.0706682	0.0653011	0.0322967	0.924022
YCL040W	GLK1	-2.32847	-0.529786	1.77924	-0.280622	-1.66206	1.31315	0.373778	1.99107e-09	0.00875973	5.31517e-08	0.123233	1.86206e-07	1.19006e-06	0.0262026	-2.32847	-0.529786	1.77924	-0.280622	-1.66206	1.31315	0.373778	1.99107e-09	0.00875973	5.31517e-08	0.123233	1.86206e-07	1.19006e-06	0.0262026
YCL042W	YCL042W	-0.529736	-0.257633	0.425141	0.595378	#NAME?	0.474534	0.411252	0.520476	0.778763	0.545505	0.395363	NA	0.523503	0.56584	-0.529736	-0.257633	0.425141	0.595378	-15.5405	0.474534	0.411252	0.520476	0.778763	0.545505	0.395363	0.029806	0.523503	0.56584
YCL043C	PDI1	-0.440507	-0.0749855	-0.0251438	-0.633218	-0.882513	-0.14595	-0.75543	0.0464785	0.778763	0.924056	0.00726707	0.000539011	0.545039	0.000910315	-0.440507	-0.0749855	-0.0251438	-0.633218	-0.882513	-0.14595	-0.75543	0.0464785	0.778763	0.924056	0.00726707	0.000539011	0.545039	0.000910315
YCL045C	EMC1	-0.106882	0.331908	-0.0447398	0.191199	0.169708	0.198028	-0.828383	0.880906	0.601635	0.95156	0.773383	0.79208	0.777524	0.102903	-0.106882	0.331908	-0.0447398	0.191199	0.169708	0.198028	-0.828383	0.880906	0.601635	0.95156	0.773383	0.79208	0.777524	0.102903
YCL050C	APA1	0.209188	-0.186396	-0.595813	-0.118777	-0.299502	-0.53526	-0.634557	0.348083	0.41593	0.00664032	0.603404	0.15935	0.0146445	0.00275772	0.209188	-0.186396	-0.595813	-0.118777	-0.299502	-0.53526	-0.634557	0.348083	0.41593	0.00664032	0.603404	0.15935	0.0146445	0.00275772
YCL054W	SPB1	-0.127341	-0.304188	-0.753422	-0.34273	0.340083	-0.669619	#NAME?	0.927748	0.821749	0.495963	0.783098	0.780295	0.575735	NA	-0.127341	-0.304188	-0.753422	-0.34273	0.340083	-0.669619	-12.5504	0.927748	0.821749	0.495963	0.783098	0.780295	0.575735	0.0207739
YCL057C-A	MIC10	#NAME?	-1.20283	-0.591087	0.932299	-0.871318	0.0304152	-0.891671	NA	0.0481864	0.262109	0.0937079	0.113073	0.961244	0.0531529	-9.42833	-1.20283	-0.591087	0.932299	-0.871318	0.0304152	-0.891671	0.0456004	0.0481864	0.262109	0.0937079	0.113073	0.961244	0.0531529
YCL057W	PRD1	-0.307511	-0.196512	-0.343758	-0.510395	-0.398295	0.141228	-1.04461	0.467801	0.666386	0.382192	0.192853	0.321587	0.769581	0.00588292	-0.307511	-0.196512	-0.343758	-0.510395	-0.398295	0.141228	-1.04461	0.467801	0.666386	0.382192	0.192853	0.321587	0.769581	0.00588292
YCL059C	KRR1	0.663598	-0.437413	-1.4106	-0.926984	-0.00847844	-1.59952	-1.24362	0.257445	0.481516	0.0140305	0.10263	0.989559	0.00721329	0.0192476	0.663598	-0.437413	-1.4106	-0.926984	-0.00847844	-1.59952	-1.24362	0.257445	0.481516	0.0140305	0.10263	0.989559	0.00721329	0.0192476
YCL061C	MRC1	0.0184122	0.410056	0.578543	1.01962	0.880233	0.199969	1.11427	0.985701	0.604776	0.466671	0.150941	0.222418	0.824707	0.0828591	0.0184122	0.410056	0.578543	1.01962	0.880233	0.199969	1.11427	0.985701	0.604776	0.466671	0.150941	0.222418	0.824707	0.0828591
YCL064C	CHA1	-1.09319	-1.55675	-2.06693	-2.03573	-2.04378	0.000822904	#NAME?	0.0223172	0.00380968	0.000230993	0.000520308	0.00032758	0.999772	NA	-1.09319	-1.55675	-2.06693	-2.03573	-2.04378	0.000822904	-14.9739	0.0223172	0.00380968	0.000230993	0.000520308	0.00032758	0.999772	0.031205
YCR002C	CDC10	-1.15493	-0.640789	-0.435271	-0.858288	-1.37408	-1.01673	-1.37431	0.00246214	0.076555	0.196134	0.0174895	0.000636424	0.00549915	0.000303519	-1.15493	-0.640789	-0.435271	-0.858288	-1.37408	-1.01673	-1.37431	0.00246214	0.076555	0.196134	0.0174895	0.000636424	0.00549915	0.000303519
YCR004C	YCP4	-1.08787	-0.81321	0.189317	-0.115425	-0.404502	-0.534975	-1.23526	0.0114383	0.0588178	0.666869	0.811757	0.333897	0.192976	0.00242106	-1.08787	-0.81321	0.189317	-0.115425	-0.404502	-0.534975	-1.23526	0.0114383	0.0588178	0.666869	0.811757	0.333897	0.192976	0.00242106
YCR005C	CIT2	0.0905313	0.616286	-0.536206	-0.150436	2.33153	-0.563681	0.804438	0.888842	0.250302	0.28689	0.802214	0.0002404	0.341958	0.0812984	0.0905313	0.616286	-0.536206	-0.150436	2.33153	-0.563681	0.804438	0.888842	0.250302	0.28689	0.802214	0.0002404	0.341958	0.0812984
YCR009C	RVS161	-0.999551	-0.604425	-0.780866	-0.445798	-0.408541	-0.808492	-1.13762	0.0058517	0.0862735	0.0210366	0.186391	0.236366	0.0194693	0.00116432	-0.999551	-0.604425	-0.780866	-0.445798	-0.408541	-0.808492	-1.13762	0.0058517	0.0862735	0.0210366	0.186391	0.236366	0.0194693	0.00116432
YCR012W	PGK1	0.145034	0.470256	0.390351	0.240179	0.30137	1.00291	0.867476	0.217982	0.000758061	0.00156203	0.0385218	0.0104181	1.08362e-07	9.66055e-07	0.145034	0.470256	0.390351	0.240179	0.30137	1.00291	0.867476	0.217982	0.000758061	0.00156203	0.0385218	0.0104181	1.08362e-07	9.66055e-07
YCR016W	YCR016W	0.262951	-0.222	-0.364347	-0.287184	0.679605	-0.70623	-0.32038	0.549495	0.625384	0.36322	0.495856	0.0901618	0.119149	0.385984	0.262951	-0.222	-0.364347	-0.287184	0.679605	-0.70623	-0.32038	0.549495	0.625384	0.36322	0.495856	0.0901618	0.119149	0.385984
YCR017C	CWH43	#NAME?	-0.345983	-0.597522	-0.393103	0.0336348	-0.584098	-0.139091	NA	0.533496	0.28689	0.603785	0.951056	0.265617	0.8498	-11.8431	-0.345983	-0.597522	-0.393103	0.0336348	-0.584098	-0.139091	0.0100234	0.533496	0.28689	0.603785	0.951056	0.265617	0.8498
YCR020W-B	HTL1	-0.659113	-0.508546	0.847575	0.0562823	-0.205498	0.0635653	0.282338	0.623176	0.750249	0.545505	0.978755	0.882135	0.972762	0.874197	-0.659113	-0.508546	0.847575	0.0562823	-0.205498	0.0635653	0.282338	0.623176	0.750249	0.545505	0.978755	0.882135	0.972762	0.874197
YCR026C	NPP1	-0.589445	#NAME?	-0.583831	#NAME?	#NAME?	#NAME?	#NAME?	0.658403	NA	0.644893	NA	NA	NA	NA	-0.589445	-9.71341	-0.583831	-8.73492	-9.07467	-8.37511	-12.2471	0.658403	0.0125579	0.644893	0.0120388	0.0455348	0.0195058	0.0131091
YCR028C-A	RIM1	-0.921462	-1.20196	-0.284457	0.0223743	-0.276056	0.0188109	-0.381839	0.00270747	0.000643124	0.300725	0.95667	0.335726	0.959225	0.128107	-0.921462	-1.20196	-0.284457	0.0223743	-0.276056	0.0188109	-0.381839	0.00270747	0.000643124	0.300725	0.95667	0.335726	0.959225	0.128107
YCR030C	SYP1	-1.06036	-0.320689	0.214661	-0.468301	-1.00853	-0.468689	-0.519536	0.000905146	0.266966	0.445209	0.0891888	0.00119283	0.0900875	0.0385927	-1.06036	-0.320689	0.214661	-0.468301	-1.00853	-0.468689	-0.519536	0.000905146	0.266966	0.445209	0.0891888	0.00119283	0.0900875	0.0385927
YCR031C	RPS14A	0.31644	-0.38169	-2.98771	0.0190205	#NAME?	-0.843381	-0.316719	0.868266	0.845491	0.0825891	0.992142	NA	0.741448	0.859691	0.31644	-0.38169	-2.98771	0.0190205	-17.0194	-0.843381	-0.316719	0.868266	0.845491	0.0825891	0.992142	0.0382573	0.741448	0.859691
YCR034W	ELO2	-0.961057	-0.811967	-0.658731	0.259264	-0.172412	-1.43571	-1.34261	0.0903513	0.147684	0.314384	0.644196	0.734648	0.019249	0.0393552	-0.961057	-0.811967	-0.658731	0.259264	-0.172412	-1.43571	-1.34261	0.0903513	0.147684	0.314384	0.644196	0.734648	0.019249	0.0393552
YCR035C	RRP43	0.0835953	-1.09237	-0.94398	-1.56899	-0.637089	-0.227236	#NAME?	0.951533	0.288366	0.326402	0.257659	0.532423	0.852589	NA	0.0835953	-1.09237	-0.94398	-1.56899	-0.637089	-0.227236	-13.3481	0.951533	0.288366	0.326402	0.257659	0.532423	0.852589	0.0222757
YCR036W	RBK1	-1.04691	-0.340267	0.112788	0.427633	-0.313038	0.0410064	-0.943475	0.0667988	0.585315	0.861418	0.462817	0.595485	0.95841	0.093111	-1.04691	-0.340267	0.112788	0.427633	-0.313038	0.0410064	-0.943475	0.0667988	0.585315	0.861418	0.462817	0.595485	0.95841	0.093111
YCR043C	YCR043C	#NAME?	#NAME?	#NAME?	#NAME?	0.912137	#NAME?	#NAME?	NA	NA	NA	NA	0.165328	NA	NA	-9.73766	-9.33393	-9.97973	-8.35544	0.912137	-7.99563	-11.8676	0.0459815	0.0136759	0.0452372	0.0168471	0.165328	0.0447812	0.0235599
YCR046C	IMG1	-0.00601726	#NAME?	#NAME?	#NAME?	#NAME?	0.658529	#NAME?	0.995089	NA	NA	NA	NA	0.499278	NA	-0.00601726	-6.63884	-7.28465	-5.66035	-6.0001	0.658529	-9.17251	0.995089	0.0412887	0.0386861	0.048246	0.0107983	0.499278	0.0275336
YCR051W	YCR051W	-0.727073	-0.729198	-0.739099	-0.470915	-1.19561	-0.485699	-0.828902	0.101795	0.104468	0.0800346	0.284764	0.00849913	0.279332	0.0368823	-0.727073	-0.729198	-0.739099	-0.470915	-1.19561	-0.485699	-0.828902	0.101795	0.104468	0.0800346	0.284764	0.00849913	0.279332	0.0368823
YCR052W	RSC6	-0.848761	0.0297119	0.209349	0.0676982	-1.05178	-0.438667	-0.33363	0.212822	0.973171	0.772496	0.940311	0.109459	0.548646	0.599118	-0.848761	0.0297119	0.209349	0.0676982	-1.05178	-0.438667	-0.33363	0.212822	0.973171	0.772496	0.940311	0.109459	0.548646	0.599118
YCR053W	THR4	-0.178874	-0.293708	-0.67888	-0.174816	0.335168	0.188638	-0.293648	0.422308	0.17554	0.00230822	0.420418	0.107941	0.390679	0.11862	-0.178874	-0.293708	-0.67888	-0.174816	0.335168	0.188638	-0.293648	0.422308	0.17554	0.00230822	0.420418	0.107941	0.390679	0.11862
YCR057C	PWP2	0.338528	0.523745	-0.25612	-0.0681875	0.566623	-0.853923	-0.931289	0.587156	0.38562	0.672422	0.927514	0.32788	0.134945	0.196069	0.338528	0.523745	-0.25612	-0.0681875	0.566623	-0.853923	-0.931289	0.587156	0.38562	0.672422	0.927514	0.32788	0.134945	0.196069
YCR059C	YIH1	#NAME?	-0.330325	#NAME?	-0.647365	#NAME?	#NAME?	-1.56564	NA	0.385063	NA	0.136653	NA	NA	0.0231248	-6.69255	-0.330325	-6.93462	-0.647365	-5.65007	-4.95052	-1.56564	0.0293598	0.385063	0.0268728	0.136653	0.0495578	0.0200114	0.0231248
YCR060W	TAH1	-0.7828	0.479562	-0.278477	-0.187531	-0.436357	0.0608711	0.890766	0.127412	0.370541	0.599514	0.743365	0.401596	0.928304	0.0498331	-0.7828	0.479562	-0.278477	-0.187531	-0.436357	0.0608711	0.890766	0.127412	0.370541	0.599514	0.743365	0.401596	0.928304	0.0498331
YCR071C	IMG2	0.415098	-0.369655	0.396384	-0.322095	-0.368703	1.03485	-0.0585674	0.760029	0.715465	0.668266	0.741754	0.778595	0.244967	0.952804	0.415098	-0.369655	0.396384	-0.322095	-0.368703	1.03485	-0.0585674	0.760029	0.715465	0.668266	0.741754	0.778595	0.244967	0.952804
YCR072C	RSA4	0.864096	-0.0833319	-0.101173	0.181605	0.594365	0.0814347	#NAME?	0.249983	0.938793	0.929402	0.876918	0.418562	0.931226	NA	0.864096	-0.0833319	-0.101173	0.181605	0.594365	0.0814347	-10.8251	0.249983	0.938793	0.929402	0.876918	0.418562	0.931226	0.0344968
YCR073W-A	SOL2	-0.963704	-0.996837	-0.348556	-1.07105	-0.951878	-0.230672	-0.957537	0.0132348	0.0138961	0.345944	0.00768973	0.0127669	0.578046	0.00746776	-0.963704	-0.996837	-0.348556	-1.07105	-0.951878	-0.230672	-0.957537	0.0132348	0.0138961	0.345944	0.00768973	0.0127669	0.578046	0.00746776
YCR075W-A	EGO2	0.47578	0.0504753	0.293171	-0.160531	0.426045	0.259972	-0.093691	0.334687	0.939637	0.550629	0.794921	0.385253	0.631049	0.86711	0.47578	0.0504753	0.293171	-0.160531	0.426045	0.259972	-0.093691	0.334687	0.939637	0.550629	0.794921	0.385253	0.631049	0.86711
YCR076C	FUB1	#NAME?	#NAME?	0.0453163	#NAME?	#NAME?	#NAME?	0.472121	NA	NA	0.400489	NA	NA	NA	0.0568093	-9.93432	-9.53059	0.0453163	-8.5521	-8.89185	-8.19229	0.472121	0.0135929	0.0203898	0.400489	0.0347607	0.0291397	0.0145384	0.0568093
YCR077C	PAT1	-0.441799	-0.867297	-1.10945	-0.803759	-0.0701242	-0.283952	-1.01882	0.59297	0.269893	0.126847	0.289669	0.934209	0.754168	0.13058	-0.441799	-0.867297	-1.10945	-0.803759	-0.0701242	-0.283952	-1.01882	0.59297	0.269893	0.126847	0.289669	0.934209	0.754168	0.13058
YCR083W	TRX3	-0.93616	-0.0654606	1.13552	0.402562	-0.379138	2.73315	1.15391	0.224337	0.947833	0.117471	0.616076	0.632093	0.00105295	0.085113	-0.93616	-0.0654606	1.13552	0.402562	-0.379138	2.73315	1.15391	0.224337	0.947833	0.117471	0.616076	0.632093	0.00105295	0.085113
YCR084C	TUP1	-1.03178	-0.735309	-0.268323	-0.346295	-0.897606	-0.619123	-0.655292	0.000474541	0.00778546	0.271161	0.161359	0.00129098	0.0151955	0.0062558	-1.03178	-0.735309	-0.268323	-0.346295	-0.897606	-0.619123	-0.655292	0.000474541	0.00778546	0.271161	0.161359	0.00129098	0.0151955	0.0062558
YCR086W	CSM1	#NAME?	-0.939191	#NAME?	#NAME?	#NAME?	-0.0576641	-0.487443	NA	0.0570169	NA	NA	NA	0.865003	0.0774862	-12.6073	-0.939191	-12.8494	-11.2251	-11.5648	-0.0576641	-0.487443	0.0214813	0.0570169	0.046696	0.0451912	0.0223706	0.865003	0.0774862
YCR087C-A	YCR087C-A	-0.112482	-0.633102	-1.20044	-1.71136	0.242291	-0.104673	-0.831461	0.919069	0.485058	0.139211	0.0440512	0.798631	0.926097	0.327996	-0.112482	-0.633102	-1.20044	-1.71136	0.242291	-0.104673	-0.831461	0.919069	0.485058	0.139211	0.0440512	0.798631	0.926097	0.327996
YCR088W	ABP1	-1.01401	-0.439988	0.165447	-0.530454	-0.587098	0.292537	-0.299733	4.94546e-05	0.0319084	0.38783	0.00973768	0.00415244	0.128992	0.0813524	-1.01401	-0.439988	0.165447	-0.530454	-0.587098	0.292537	-0.299733	4.94546e-05	0.0319084	0.38783	0.00973768	0.00415244	0.128992	0.0813524
YCR090C	YCR090C	-1.09036	-0.362393	-0.626583	-1.37039	-0.786607	-0.70104	-0.978946	0.241717	0.73309	0.501761	0.172539	0.39961	0.468617	0.227647	-1.09036	-0.362393	-0.626583	-1.37039	-0.786607	-0.70104	-0.978946	0.241717	0.73309	0.501761	0.172539	0.39961	0.468617	0.227647
YCR092C	MSH3	0.327742	1.31053	0.373738	-0.391729	0.0241875	1.16525	-0.221759	0.568215	0.0194548	0.487242	0.468876	0.965064	0.0270154	0.662267	0.327742	1.31053	0.373738	-0.391729	0.0241875	1.16525	-0.221759	0.568215	0.0194548	0.487242	0.468876	0.965064	0.0270154	0.662267
YCR093W	CDC39	-0.783002	-0.419363	-1.15094	-0.878692	0.646163	-0.252407	-1.27018	0.193588	0.513188	0.0442588	0.131753	0.276248	0.71446	0.0198964	-0.783002	-0.419363	-1.15094	-0.878692	0.646163	-0.252407	-1.27018	0.193588	0.513188	0.0442588	0.131753	0.276248	0.71446	0.0198964
YDL003W	MCD1	-2.00835	-0.708785	-0.294112	0.232458	-1.15184	NA	0.946765	0.000335699	0.100506	0.487242	0.595567	0.0101582	NA	0.0177671	-2.00835	-0.708785	-0.294112	0.232458	-1.15184	NA	0.946765	0.000335699	0.100506	0.487242	0.595567	0.0101582	NA	0.0177671
YDL004W	ATP16	-1.25165	-1.38935	0.818602	-0.607699	-1.83166	1.53986	1.13743	0.063619	0.0475378	0.205496	0.374207	0.00809099	0.0223451	0.0570262	-1.25165	-1.38935	0.818602	-0.607699	-1.83166	1.53986	1.13743	0.063619	0.0475378	0.205496	0.374207	0.00809099	0.0223451	0.0570262
YDL005C	MED2	#NAME?	-0.547123	0.484303	-0.817423	-0.653721	#NAME?	#NAME?	NA	0.612485	0.627354	0.379922	0.532133	NA	NA	-7.11699	-0.547123	0.484303	-0.817423	-0.653721	-5.37496	-9.24693	0.0275712	0.612485	0.627354	0.379922	0.532133	0.039976	0.0494474
YDL006W	PTC1	-0.877032	-1.35906	-1.0734	-0.548849	#NAME?	-0.639646	-1.0366	0.396939	0.104491	0.165013	0.446298	NA	0.378887	0.145239	-0.877032	-1.35906	-1.0734	-0.548849	-10.1965	-0.639646	-1.0366	0.396939	0.104491	0.165013	0.446298	0.0107747	0.378887	0.145239
YDL007W	RPT2	-0.55808	-0.55334	-0.635969	-0.617775	-0.484361	-0.18641	-1.0401	0.0316247	0.0401646	0.0130813	0.0193966	0.0547925	0.500857	0.000241217	-0.55808	-0.55334	-0.635969	-0.617775	-0.484361	-0.18641	-1.0401	0.0316247	0.0401646	0.0130813	0.0193966	0.0547925	0.500857	0.000241217
YDL012C	YDL012C	-0.92008	-0.559114	-0.343944	0.0877458	0.50562	0.368305	0.577383	0.119596	0.349647	0.600125	0.912188	0.543082	0.549592	0.427252	-0.92008	-0.559114	-0.343944	0.0877458	0.50562	0.368305	0.577383	0.119596	0.349647	0.600125	0.912188	0.543082	0.549592	0.427252
YDL014W	NOP1	-0.275628	-0.406087	-1.04511	-0.945812	-0.503942	-0.864662	-1.38418	0.222173	0.0761501	0.000101402	0.000475641	0.0227185	0.000571839	4.65387e-06	-0.275628	-0.406087	-1.04511	-0.945812	-0.503942	-0.864662	-1.38418	0.222173	0.0761501	0.000101402	0.000475641	0.0227185	0.000571839	4.65387e-06
YDL015C	TSC13	-0.169807	0.200267	-1.2387	-0.224412	-0.187669	-0.666864	-0.441737	0.846664	0.821972	0.0755174	0.84506	0.817581	0.3653	0.503733	-0.169807	0.200267	-1.2387	-0.224412	-0.187669	-0.666864	-0.441737	0.846664	0.821972	0.0755174	0.84506	0.817581	0.3653	0.503733
YDL019C	OSH2	-0.751969	-0.359284	-0.0570082	0.0354169	-0.70421	1.06049	-0.133736	0.290623	0.649882	0.948281	0.971985	0.317707	0.126408	0.85364	-0.751969	-0.359284	-0.0570082	0.0354169	-0.70421	1.06049	-0.133736	0.290623	0.649882	0.948281	0.971985	0.317707	0.126408	0.85364
YDL021W	GPM2	#NAME?	-0.193118	3.0322	1.10777	0.165054	1.27087	1.41141	NA	0.826454	0.000810856	0.124646	0.881105	0.083777	0.0357453	-8.28988	-0.193118	3.0322	1.10777	0.165054	1.27087	1.41141	0.0356717	0.826454	0.000810856	0.124646	0.881105	0.083777	0.0357453
YDL022W	GPD1	-1.7005	-0.785273	0.362833	-0.175213	-0.811808	0.111592	0.237581	4.33592e-06	0.00588698	0.140931	0.511079	0.0031642	0.708636	0.302876	-1.7005	-0.785273	0.362833	-0.175213	-0.811808	0.111592	0.237581	4.33592e-06	0.00588698	0.140931	0.511079	0.0031642	0.708636	0.302876
YDL029W	ARP2	-0.389844	-0.086759	-0.224965	-0.164143	-0.420612	0.067233	-0.667564	0.0353527	0.686285	0.204444	0.382557	0.0222777	0.761869	0.000551318	-0.389844	-0.086759	-0.224965	-0.164143	-0.420612	0.067233	-0.667564	0.0353527	0.686285	0.204444	0.382557	0.0222777	0.761869	0.000551318
YDL031W	DBP10	-0.434701	-0.53968	-1.22047	-1.33807	-0.187539	-0.900916	-1.46425	0.559351	0.460762	0.0651505	0.0771776	0.809087	0.187397	0.0207041	-0.434701	-0.53968	-1.22047	-1.33807	-0.187539	-0.900916	-1.46425	0.559351	0.460762	0.0651505	0.0771776	0.809087	0.187397	0.0207041
YDL040C	NAT1	-0.258624	-0.554751	-1.523	-1.00757	-0.215064	-0.668998	-1.76915	0.543713	0.165144	0.000518888	0.0138299	0.599558	0.0853234	9.93928e-05	-0.258624	-0.554751	-1.523	-1.00757	-0.215064	-0.668998	-1.76915	0.543713	0.165144	0.000518888	0.0138299	0.599558	0.0853234	9.93928e-05
YDL043C	PRP11	-0.936263	#NAME?	#NAME?	-0.554022	-1.22035	-1.2054	#NAME?	0.240506	NA	NA	0.322131	0.192637	0.194498	NA	-0.936263	-9.29563	-9.94144	-0.554022	-1.22035	-1.2054	-11.8293	0.240506	0.0353045	0.0111996	0.322131	0.192637	0.194498	0.0196174
YDL046W	NPC2	-1.3869	-0.43173	0.56722	-0.314194	-0.943878	0.476295	-0.113788	0.027591	0.339586	0.170955	0.477928	0.0296921	0.277345	0.797165	-1.3869	-0.43173	0.56722	-0.314194	-0.943878	0.476295	-0.113788	0.027591	0.339586	0.170955	0.477928	0.0296921	0.277345	0.797165
YDL047W	SIT4	-0.705655	-0.302485	-0.776252	-0.293342	0.928104	-1.1654	-1.01484	0.25641	0.702884	0.186086	0.655926	0.123603	0.0870411	0.0628864	-0.705655	-0.302485	-0.776252	-0.293342	0.928104	-1.1654	-1.01484	0.25641	0.702884	0.186086	0.655926	0.123603	0.0870411	0.0628864
YDL051W	LHP1	-0.223293	-0.781069	-0.950396	-0.443324	-0.50663	-0.440437	-1.00149	0.500543	0.0184862	0.00323553	0.145205	0.0961885	0.152887	0.00140891	-0.223293	-0.781069	-0.950396	-0.443324	-0.50663	-0.440437	-1.00149	0.500543	0.0184862	0.00323553	0.145205	0.0961885	0.152887	0.00140891
YDL052C	SLC1	0.0982533	0.17475	-0.19614	-0.142244	0.599016	0.682002	-0.370121	0.880906	0.782616	0.72449	0.817012	0.257117	0.191221	0.438451	0.0982533	0.17475	-0.19614	-0.142244	0.599016	0.682002	-0.370121	0.880906	0.782616	0.72449	0.817012	0.257117	0.191221	0.438451
YDL053C	PBP4	-1.02342	-1.62564	-0.9265	-0.737523	-2.23612	-0.926067	-1.66552	0.281798	0.0888302	0.306338	0.44312	0.0172429	0.329538	0.0460898	-1.02342	-1.62564	-0.9265	-0.737523	-2.23612	-0.926067	-1.66552	0.281798	0.0888302	0.306338	0.44312	0.0172429	0.329538	0.0460898
YDL055C	PSA1	-0.762042	-0.605268	-0.125533	-0.573903	-1.28877	-0.0855794	-0.661211	0.00340144	0.0187019	0.619618	0.0205338	3.52229e-05	0.769798	0.00442136	-0.762042	-0.605268	-0.125533	-0.573903	-1.28877	-0.0855794	-0.661211	0.00340144	0.0187019	0.619618	0.0205338	3.52229e-05	0.769798	0.00442136
YDL058W	USO1	-0.924695	-0.340751	-0.84642	-0.133746	-0.884085	0.227823	-0.887295	0.100187	0.57925	0.114994	0.841615	0.10759	0.726362	0.0739487	-0.924695	-0.340751	-0.84642	-0.133746	-0.884085	0.227823	-0.887295	0.100187	0.57925	0.114994	0.841615	0.10759	0.726362	0.0739487
YDL060W	TSR1	-0.296342	0.120817	-0.930834	-0.475925	-0.185098	-0.0532062	-0.619231	0.591925	0.851041	0.0564823	0.355374	0.739926	0.936884	0.168156	-0.296342	0.120817	-0.930834	-0.475925	-0.185098	-0.0532062	-0.619231	0.591925	0.851041	0.0564823	0.355374	0.739926	0.936884	0.168156
YDL061C	RPS29B	-0.336366	-0.0227181	-0.323601	-0.162579	-0.0337963	0.363442	-0.869457	0.562065	0.973717	0.554896	0.793216	0.952116	0.529925	0.0667887	-0.336366	-0.0227181	-0.323601	-0.162579	-0.0337963	0.363442	-0.869457	0.562065	0.973717	0.554896	0.793216	0.952116	0.529925	0.0667887
YDL064W	UBC9	-0.670392	-0.34198	-0.763825	-0.816042	-1.01826	-0.717239	-0.284708	0.0327254	0.290862	0.0137855	0.0124129	0.00242957	0.0218073	0.307432	-0.670392	-0.34198	-0.763825	-0.816042	-1.01826	-0.717239	-0.284708	0.0327254	0.290862	0.0137855	0.0124129	0.00242957	0.0218073	0.307432
YDL065C	PEX19	-1.09764	-0.290736	-0.35742	0.00817147	-1.10958	-0.276069	0.0375117	0.0630885	0.665643	0.553138	0.991909	0.0547078	0.683111	0.954792	-1.09764	-0.290736	-0.35742	0.00817147	-1.10958	-0.276069	0.0375117	0.0630885	0.665643	0.553138	0.991909	0.0547078	0.683111	0.954792
YDL066W	IDP1	-0.554989	-0.277784	0.0212116	0.430782	0.0826727	-0.125905	-0.0820331	0.0759025	0.40108	0.957045	0.160546	0.815981	0.729823	0.798888	-0.554989	-0.277784	0.0212116	0.430782	0.0826727	-0.125905	-0.0820331	0.0759025	0.40108	0.957045	0.160546	0.815981	0.729823	0.798888
YDL067C	COX9	#NAME?	#NAME?	#NAME?	-1.93136	#NAME?	1.62896	#NAME?	NA	NA	NA	0.0662799	NA	0.0525454	NA	-10.0088	-9.60509	-10.2509	-1.93136	-8.96634	1.62896	-12.1388	0.0226584	0.0397736	0.0473278	0.0662799	0.0192661	0.0525454	0.0100775
YDL070W	BDF2	Inf	Inf	NA	Inf	NA	NA	NA	NA	NA	NA	NA	NA	NA	NA	15.3455	14.7393	NA	15.2899	NA	NA	NA	0.0450493	0.0351583	NA	0.0495147	NA	NA	NA
YDL072C	YET3	-2.24795	-1.08888	-0.908708	-0.264503	0.133346	-0.73678	-1.35942	0.106729	0.453795	0.515025	0.875275	0.930781	0.631312	0.293473	-2.24795	-1.08888	-0.908708	-0.264503	0.133346	-0.73678	-1.35942	0.106729	0.453795	0.515025	0.875275	0.930781	0.631312	0.293473
YDL074C	BRE1	-0.205646	-0.113827	-0.309805	0.0117337	0.468903	-0.23079	-0.0630358	0.77154	0.885741	0.586122	0.990149	0.559484	0.715279	0.924648	-0.205646	-0.113827	-0.309805	0.0117337	0.468903	-0.23079	-0.0630358	0.77154	0.885741	0.586122	0.990149	0.559484	0.715279	0.924648
YDL075W	RPL31A	-0.606525	-1.69206	-0.979262	-1.20854	-0.609874	-1.60188	-1.19186	0.532319	0.0694166	0.260645	0.170802	0.514549	0.0716678	0.133448	-0.606525	-1.69206	-0.979262	-1.20854	-0.609874	-1.60188	-1.19186	0.532319	0.0694166	0.260645	0.170802	0.514549	0.0716678	0.133448
YDL076C	RXT3	#NAME?	#NAME?	0.191303	#NAME?	#NAME?	-0.935981	-1.05827	NA	NA	0.248557	NA	NA	0.0229067	0.0160139	-7.38107	-6.97734	0.191303	-5.99885	-6.3386	-0.935981	-1.05827	0.0357145	0.0467782	0.248557	0.0402889	0.0118641	0.0229067	0.0160139
YDL078C	MDH3	-0.770611	-0.485228	0.13415	-0.039289	-0.740973	0.00031169	-0.640608	0.00493637	0.0697269	0.619855	0.90491	0.00583277	0.999772	0.00858053	-0.770611	-0.485228	0.13415	-0.039289	-0.740973	0.00031169	-0.640608	0.00493637	0.0697269	0.619855	0.90491	0.00583277	0.999772	0.00858053
YDL081C	RPP1A	-1.26521	-1.04628	-0.907001	-0.685165	-1.13383	-1.24657	-1.33704	0.00625947	0.0243089	0.0336584	0.11283	0.0110004	0.0061767	0.00210399	-1.26521	-1.04628	-0.907001	-0.685165	-1.13383	-1.24657	-1.33704	0.00625947	0.0243089	0.0336584	0.11283	0.0110004	0.0061767	0.00210399
YDL082W	RPL13A	1.10104	0.0178784	0.44073	0.876201	-0.219951	0.594824	0.494346	0.00831683	0.972826	0.246273	0.0283981	0.589637	0.127649	0.155296	1.10104	0.0178784	0.44073	0.876201	-0.219951	0.594824	0.494346	0.00831683	0.972826	0.246273	0.0283981	0.589637	0.127649	0.155296
YDL084W	SUB2	-0.606101	-0.550605	-0.646346	-0.783057	-0.518213	-1.07559	-1.23548	0.0131668	0.0273459	0.00707839	0.00297566	0.0280253	0.000130012	2.82985e-05	-0.606101	-0.550605	-0.646346	-0.783057	-0.518213	-1.07559	-1.23548	0.0131668	0.0273459	0.00707839	0.00297566	0.0280253	0.000130012	2.82985e-05
YDL085C-A	YDL085C-A	#NAME?	-1.06198	#NAME?	-0.727068	#NAME?	-0.162624	#NAME?	NA	0.456534	NA	0.47067	NA	0.919943	NA	-10.3863	-1.06198	-10.6284	-0.727068	-9.34384	-0.162624	-12.5163	0.0141906	0.456534	0.0320961	0.47067	0.0311663	0.919943	0.0170528
YDL086W	YDL086W	-1.04185	-0.507964	0.251563	-0.693636	-0.581623	-0.65728	-0.484155	0.00560308	0.160303	0.488073	0.0499533	0.0953669	0.0616647	0.124433	-1.04185	-0.507964	0.251563	-0.693636	-0.581623	-0.65728	-0.484155	0.00560308	0.160303	0.488073	0.0499533	0.0953669	0.0616647	0.124433
YDL088C	ASM4	#NAME?	-1.31031	-1.36598	#NAME?	-1.84268	-0.779577	-0.709291	NA	0.365535	0.231193	NA	0.212374	0.50411	0.468725	-9.5469	-1.31031	-1.36598	-8.16468	-1.84268	-0.779577	-0.709291	0.0126023	0.365535	0.231193	0.0130276	0.212374	0.50411	0.468725
YDL092W	SRP14	-0.974876	-1.16298	-0.785595	-0.764382	-1.16541	-0.712088	-1.6878	0.111759	0.0657486	0.179056	0.202484	0.0517364	0.245483	0.0040358	-0.974876	-1.16298	-0.785595	-0.764382	-1.16541	-0.712088	-1.6878	0.111759	0.0657486	0.179056	0.202484	0.0517364	0.245483	0.0040358
YDL095W	PMT1	-0.823634	-0.775578	-1.92311	-1.56265	-0.94934	-1.56356	-2.3974	0.0375688	0.0588178	7.62788e-05	0.000745467	0.0168368	0.000505681	5.74697e-06	-0.823634	-0.775578	-1.92311	-1.56265	-0.94934	-1.56356	-2.3974	0.0375688	0.0588178	7.62788e-05	0.000745467	0.0168368	0.000505681	5.74697e-06
YDL097C	RPN6	-0.0417507	-0.261912	-1.24326	-0.876698	-0.146391	-0.660552	-1.24591	0.938749	0.558647	0.00320398	0.0321343	0.744008	0.100266	0.00196216	-0.0417507	-0.261912	-1.24326	-0.876698	-0.146391	-0.660552	-1.24591	0.938749	0.558647	0.00320398	0.0321343	0.744008	0.100266	0.00196216
YDL098C	SNU23	#NAME?	0.50469	#NAME?	-0.501137	#NAME?	#NAME?	-0.185093	NA	0.107426	NA	0.0971387	NA	NA	0.147491	-6.60705	0.50469	-6.84913	-0.501137	-5.56458	-4.86502	-0.185093	0.0410996	0.107426	0.0475122	0.0971387	0.0444309	0.0436341	0.147491
YDL099W	BUG1	0.399666	0.0707468	-0.452091	-0.163199	-1.19978	0.510934	0.316382	0.741204	0.959983	0.682108	0.900909	0.251532	0.669841	0.759533	0.399666	0.0707468	-0.452091	-0.163199	-1.19978	0.510934	0.316382	0.741204	0.959983	0.682108	0.900909	0.251532	0.669841	0.759533
YDL100C	GET3	-0.221838	-0.463605	-0.814603	-0.486918	0.12602	-0.504431	-1.0038	0.433419	0.0906758	0.0034143	0.0661555	0.654206	0.0572759	0.000435973	-0.221838	-0.463605	-0.814603	-0.486918	0.12602	-0.504431	-1.0038	0.433419	0.0906758	0.0034143	0.0661555	0.654206	0.0572759	0.000435973
YDL101C	DUN1	-1.29226	0.571853	-0.293634	-1.23009	-1.09312	#NAME?	#NAME?	0.311018	0.676332	0.821552	0.325642	0.384635	NA	NA	-1.29226	0.571853	-0.293634	-1.23009	-1.09312	-7.62812	-11.5001	0.311018	0.676332	0.821552	0.325642	0.384635	0.0327276	0.0380667
YDL103C	QRI1	-0.64883	-0.452626	-0.563912	-0.471158	-0.844175	-0.543912	-1.11615	0.0146327	0.0881045	0.0258652	0.0652136	0.00245319	0.0346904	0.000139789	-0.64883	-0.452626	-0.563912	-0.471158	-0.844175	-0.543912	-1.11615	0.0146327	0.0881045	0.0258652	0.0652136	0.00245319	0.0346904	0.000139789
YDL106C	PHO2	1.8633	NA	NA	-0.0578742	NA	NA	NA	0.0249475	NA	NA	0.894725	NA	NA	NA	1.8633	NA	NA	-0.0578742	NA	NA	NA	0.0249475	NA	NA	0.894725	NA	NA	NA
YDL110C	TMA17	-2.19054	-0.676409	2.54787	0.125647	-1.19582	0.231694	0.300707	0.0223172	0.446645	0.00360213	0.905209	0.14659	0.82537	0.711504	-2.19054	-0.676409	2.54787	0.125647	-1.19582	0.231694	0.300707	0.0223172	0.446645	0.00360213	0.905209	0.14659	0.82537	0.711504
YDL111C	RRP42	-0.976132	NA	NA	-1.27449	-0.819311	NA	-1.06368	0.192529	NA	NA	0.114247	0.274992	NA	0.12708	-0.976132	NA	NA	-1.27449	-0.819311	NA	-1.06368	0.192529	NA	NA	0.114247	0.274992	NA	0.12708
YDL112W	TRM3	1.30966	0.576655	#NAME?	0.501815	0.897681	-0.407845	#NAME?	0.0133124	0.212468	NA	0.400241	0.0550205	0.410144	NA	1.30966	0.576655	-9.12808	0.501815	0.897681	-0.407845	-11.016	0.0133124	0.212468	0.0141362	0.400241	0.0550205	0.410144	0.0250051
YDL115C	IWR1	0.369519	-0.0819804	0.332342	-0.356132	-0.114497	0.472019	-0.181364	0.747058	0.950434	0.752091	0.748001	0.914113	0.677609	0.859691	0.369519	-0.0819804	0.332342	-0.356132	-0.114497	0.472019	-0.181364	0.747058	0.950434	0.752091	0.748001	0.914113	0.677609	0.859691
YDL116W	NUP84	-0.222123	#NAME?	0.693204	-0.334788	0.268063	0.0027627	-0.347725	0.762277	NA	0.270004	0.656333	0.720767	0.998638	0.670829	-0.222123	-7.71	0.693204	-0.334788	0.268063	0.0027627	-0.347725	0.762277	0.0401364	0.270004	0.656333	0.720767	0.998638	0.670829
YDL120W	YFH1	-1.52508	-0.0934236	-0.94286	-0.106225	-0.796726	0.46437	0.0284141	0.126686	0.94414	0.328155	0.936564	0.428848	0.682304	0.979235	-1.52508	-0.0934236	-0.94286	-0.106225	-0.796726	0.46437	0.0284141	0.126686	0.94414	0.328155	0.936564	0.428848	0.682304	0.979235
YDL121C	YDL121C	0.247825	0.882704	0.0164321	0.720299	1.93288	1.36997	-0.122442	0.80177	0.312347	0.988745	0.444181	0.0241898	0.102243	0.887767	0.247825	0.882704	0.0164321	0.720299	1.93288	1.36997	-0.122442	0.80177	0.312347	0.988745	0.444181	0.0241898	0.102243	0.887767
YDL122W	UBP1	-0.257875	-0.121609	-0.126224	-0.605618	-0.318519	0.437978	-0.377708	0.466428	0.75714	0.719827	0.0652136	0.345695	0.185517	0.19956	-0.257875	-0.121609	-0.126224	-0.605618	-0.318519	0.437978	-0.377708	0.466428	0.75714	0.719827	0.0652136	0.345695	0.185517	0.19956
YDL123W	SNA4	#NAME?	#NAME?	1.17587	0.851777	#NAME?	0.00343962	#NAME?	NA	NA	0.339856	0.398298	NA	0.998638	NA	-8.60334	-8.19961	1.17587	0.851777	-7.56087	0.00343962	-10.7333	0.0289215	0.0247714	0.339856	0.398298	0.0486135	0.998638	0.0372935
YDL124W	YDL124W	-1.33765	0.12797	1.3114	0.012032	-0.993336	0.497183	0.690015	5.01037e-06	0.572769	4.64e-06	0.967591	8.70791e-05	0.0167979	0.00105191	-1.33765	0.12797	1.3114	0.012032	-0.993336	0.497183	0.690015	5.01037e-06	0.572769	4.64e-06	0.967591	8.70791e-05	0.0167979	0.00105191
YDL125C	HNT1	-0.112394	0.336874	-0.00759121	0.406903	0.338808	0.22768	0.137503	0.691268	0.188721	0.981157	0.100259	0.170597	0.379277	0.559506	-0.112394	0.336874	-0.00759121	0.406903	0.338808	0.22768	0.137503	0.691268	0.188721	0.981157	0.100259	0.170597	0.379277	0.559506
YDL126C	CDC48	-0.345052	-0.208325	-0.00224784	-0.429343	-0.375351	0.370921	-0.326526	0.01195	0.121429	0.988745	0.0033246	0.00610795	0.00664746	0.00870381	-0.345052	-0.208325	-0.00224784	-0.429343	-0.375351	0.370921	-0.326526	0.01195	0.121429	0.988745	0.0033246	0.00610795	0.00664746	0.00870381
YDL128W	VCX1	-0.0989107	#NAME?	-1.12083	-0.602753	-0.043654	-0.90266	#NAME?	0.918929	NA	0.144637	0.439704	0.951056	0.364231	NA	-0.0989107	-12.246	-1.12083	-0.602753	-0.043654	-0.90266	-14.7796	0.918929	0.0437535	0.144637	0.439704	0.951056	0.364231	0.0430013
YDL130W	RPP1B	-2.14332	-1.88261	-2.25021	-2.36861	-1.29421	-1.7074	-1.89774	0.00139653	0.00517879	0.000728409	0.000804722	0.0305118	0.00626828	0.00164872	-2.14332	-1.88261	-2.25021	-2.36861	-1.29421	-1.7074	-1.89774	0.00139653	0.00517879	0.000728409	0.000804722	0.0305118	0.00626828	0.00164872
YDL130W-A	STF1	-0.155503	-0.973033	1.54041	-1.18914	0.482189	1.90257	1.36748	0.927368	0.485058	0.218018	0.368731	0.735507	0.139153	0.23643	-0.155503	-0.973033	1.54041	-1.18914	0.482189	1.90257	1.36748	0.927368	0.485058	0.218018	0.368731	0.735507	0.139153	0.23643
YDL131W	LYS21	0.317138	0.130483	-1.18686	0.276144	0.613066	0.397446	-0.824665	0.472767	0.79824	0.00519693	0.521051	0.13402	0.350009	0.0280523	0.317138	0.130483	-1.18686	0.276144	0.613066	0.397446	-0.824665	0.472767	0.79824	0.00519693	0.521051	0.13402	0.350009	0.0280523
YDL132W	CDC53	-0.481368	0.338129	-0.325993	-0.85669	-1.12384	0.1673	#NAME?	0.798018	0.866563	0.854395	0.616447	0.512519	0.909114	NA	-0.481368	0.338129	-0.325993	-0.85669	-1.12384	0.1673	-13.4283	0.798018	0.866563	0.854395	0.616447	0.512519	0.909114	0.0296473
YDL134C	PPH21	#NAME?	-0.738109	-0.824798	-1.24755	-1.33969	-0.954305	-1.35074	NA	0.17757	0.112301	0.0303794	0.0532016	0.0538603	0.00703491	-13.7568	-0.738109	-0.824798	-1.24755	-1.33969	-0.954305	-1.35074	0.0225737	0.17757	0.112301	0.0303794	0.0532016	0.0538603	0.00703491
YDL135C	RDI1	-0.683231	-0.443991	-0.791738	-0.471717	-0.407972	-0.353424	-1.25669	0.0941291	0.292273	0.0435544	0.243201	0.319419	0.402415	0.00186385	-0.683231	-0.443991	-0.791738	-0.471717	-0.407972	-0.353424	-1.25669	0.0941291	0.292273	0.0435544	0.243201	0.319419	0.402415	0.00186385
YDL137W	ARF2	-1.38385	0.1174	-0.395597	-1.01728	-0.457736	0.796894	0.0599153	0.133632	0.924293	0.684758	0.262568	0.632893	0.402331	0.953691	-1.38385	0.1174	-0.395597	-1.01728	-0.457736	0.796894	0.0599153	0.133632	0.924293	0.684758	0.262568	0.632893	0.402331	0.953691
YDL140C	RPO21	-0.636041	-0.482899	-0.74217	-1.38565	-0.636511	-0.393861	-1.34512	0.0327143	0.107426	0.0118872	0.000200616	0.0296921	0.179332	9.20329e-05	-0.636041	-0.482899	-0.74217	-1.38565	-0.636511	-0.393861	-1.34512	0.0327143	0.107426	0.0118872	0.000200616	0.0296921	0.179332	9.20329e-05
YDL141W	BPL1	-0.184013	-0.303334	-0.185565	-0.0801281	#NAME?	#NAME?	-0.0299358	0.754806	0.610746	0.730986	0.873364	NA	NA	0.956712	-0.184013	-0.303334	-0.185565	-0.0801281	-8.94505	-8.2455	-0.0299358	0.754806	0.610746	0.730986	0.873364	0.0209955	0.012903	0.956712
YDL143W	CCT4	0.0198932	-0.323315	-0.649921	-0.655394	-0.486822	-0.465239	-1.10725	0.936143	0.090568	0.00126084	0.00195563	0.0104641	0.0139153	7.45092e-06	0.0198932	-0.323315	-0.649921	-0.655394	-0.486822	-0.465239	-1.10725	0.936143	0.090568	0.00126084	0.00195563	0.0104641	0.0139153	7.45092e-06
YDL144C	YDL144C	-0.675509	-0.499459	-0.41308	#NAME?	-0.131586	0.802908	-0.375162	0.511573	0.706922	0.730822	NA	0.920669	0.390832	0.736099	-0.675509	-0.499459	-0.41308	-8.13288	-0.131586	0.802908	-0.375162	0.511573	0.706922	0.730822	0.0483202	0.920669	0.390832	0.736099
YDL145C	COP1	-0.136998	-0.0989856	-0.50455	-0.419841	0.0622131	-0.139866	-1.06997	0.643959	0.755237	0.0510464	0.112298	0.840655	0.64801	0.000272151	-0.136998	-0.0989856	-0.50455	-0.419841	0.0622131	-0.139866	-1.06997	0.643959	0.755237	0.0510464	0.112298	0.840655	0.64801	0.000272151
YDL147W	RPN5	-0.175321	-0.393194	-1.23215	-0.529028	0.203445	-1.01359	-1.25198	0.721621	0.383721	0.00496397	0.209614	0.650437	0.0188638	0.00276375	-0.175321	-0.393194	-1.23215	-0.529028	0.203445	-1.01359	-1.25198	0.721621	0.383721	0.00496397	0.209614	0.650437	0.0188638	0.00276375
YDL148C	NOP14	-0.441373	-0.919762	-1.1192	-1.00329	-0.458567	-0.840408	-1.28255	0.381472	0.0697269	0.0208607	0.041106	0.355248	0.083541	0.0123758	-0.441373	-0.919762	-1.1192	-1.00329	-0.458567	-0.840408	-1.28255	0.381472	0.0697269	0.0208607	0.041106	0.355248	0.083541	0.0123758
YDL150W	RPC53	-0.482514	-0.812269	-0.822933	-0.848073	-0.869369	-1.5585	-1.43507	0.621944	0.387613	0.287572	0.287946	0.277504	0.0538082	0.0734988	-0.482514	-0.812269	-0.822933	-0.848073	-0.869369	-1.5585	-1.43507	0.621944	0.387613	0.287572	0.287946	0.277504	0.0538082	0.0734988
YDL153C	SAS10	-0.656283	-1.67527	-1.45361	-1.00746	-0.746599	-0.800062	-1.67524	0.125801	0.000896997	0.00139632	0.0205338	0.0724814	0.0566955	0.000289026	-0.656283	-1.67527	-1.45361	-1.00746	-0.746599	-0.800062	-1.67524	0.125801	0.000896997	0.00139632	0.0205338	0.0724814	0.0566955	0.000289026
YDL156W	CMR1	-0.524925	0.139665	0.569431	0.279293	-0.24043	0.0735728	-0.28313	0.549091	0.847703	0.369172	0.650665	0.690718	0.923499	0.72102	-0.524925	0.139665	0.569431	0.279293	-0.24043	0.0735728	-0.28313	0.549091	0.847703	0.369172	0.650665	0.690718	0.923499	0.72102
YDL160C	DHH1	-0.227651	-0.527022	-0.649991	-0.41446	-0.410304	-0.440101	-1.2315	0.571565	0.160983	0.0672654	0.257828	0.267727	0.235339	0.00112149	-0.227651	-0.527022	-0.649991	-0.41446	-0.410304	-0.440101	-1.2315	0.571565	0.160983	0.0672654	0.257828	0.267727	0.235339	0.00112149
YDL161W	ENT1	-0.147844	-0.64169	-0.151876	-0.130126	0.361043	-0.745993	-1.03447	0.879791	0.442094	0.864959	0.895937	0.661113	0.351989	0.134428	-0.147844	-0.64169	-0.151876	-0.130126	0.361043	-0.745993	-1.03447	0.879791	0.442094	0.864959	0.895937	0.661113	0.351989	0.134428
YDL164C	CDC9	-1.12436	-0.932908	-1.30991	-1.16722	-1.058	-0.597762	-1.19218	0.342651	0.344811	0.25456	0.316824	0.274761	0.537869	0.249371	-1.12436	-0.932908	-1.30991	-1.16722	-1.058	-0.597762	-1.19218	0.342651	0.344811	0.25456	0.316824	0.274761	0.537869	0.249371
YDL165W	CDC36	-1.04768	-0.762956	-0.782779	-1.30856	-1.03831	NA	-0.785055	0.0672479	0.179519	0.142253	0.0275732	0.0775845	NA	0.132083	-1.04768	-0.762956	-0.782779	-1.30856	-1.03831	NA	-0.785055	0.0672479	0.179519	0.142253	0.0275732	0.0775845	NA	0.132083
YDL166C	FAP7	-0.139214	-1.05359	-0.542635	-0.0121554	-0.796596	-0.187652	-1.32577	0.886234	0.182682	0.491917	0.991036	0.306875	0.844708	0.0545334	-0.139214	-1.05359	-0.542635	-0.0121554	-0.796596	-0.187652	-1.32577	0.886234	0.182682	0.491917	0.991036	0.306875	0.844708	0.0545334
YDL167C	NRP1	-0.151054	0.296026	-0.632787	1.02035	-0.578225	#NAME?	0.903747	0.958702	0.916604	0.775453	0.590679	0.801913	NA	0.654651	-0.151054	0.296026	-0.632787	1.02035	-0.578225	-6.10398	0.903747	0.958702	0.916604	0.775453	0.590679	0.801913	0.018824	0.654651
YDL168W	SFA1	-0.187116	0.0750841	-0.295945	-0.088454	-0.193335	-0.29892	-0.43664	0.53712	0.828362	0.273541	0.783098	0.506979	0.293864	0.0783785	-0.187116	0.0750841	-0.295945	-0.088454	-0.193335	-0.29892	-0.43664	0.53712	0.828362	0.273541	0.783098	0.506979	0.293864	0.0783785
YDL171C	GLT1	-0.0336492	-0.385319	-1.13753	-0.139555	1.22386	0.0733309	-0.473313	0.910955	0.108668	8.65933e-05	0.574783	4.61236e-05	0.802336	0.0268604	-0.0336492	-0.385319	-1.13753	-0.139555	1.22386	0.0733309	-0.473313	0.910955	0.108668	8.65933e-05	0.574783	4.61236e-05	0.802336	0.0268604
YDL173W	PAR32	-1.80209	-0.719181	-0.298349	-0.259083	-1.96702	0.778812	-0.288451	0.0161133	0.346343	0.701185	0.754571	0.00865997	0.294287	0.682202	-1.80209	-0.719181	-0.298349	-0.259083	-1.96702	0.778812	-0.288451	0.0161133	0.346343	0.701185	0.754571	0.00865997	0.294287	0.682202
YDL174C	DLD1	-0.918398	0.0609107	1.13033	-0.0568463	-1.21321	1.1603	-0.255129	0.079086	0.933201	0.0269757	0.935915	0.0207118	0.0263755	0.606183	-0.918398	0.0609107	1.13033	-0.0568463	-1.21321	1.1603	-0.255129	0.079086	0.933201	0.0269757	0.935915	0.0207118	0.0263755	0.606183
YDL178W	DLD2	-0.77948	-0.825216	0.00431689	-0.0595113	-0.756223	0.392869	0.263915	0.0405718	0.0388906	0.99117	0.900909	0.0430345	0.308802	0.442421	-0.77948	-0.825216	0.00431689	-0.0595113	-0.756223	0.392869	0.263915	0.0405718	0.0388906	0.99117	0.900909	0.0430345	0.308802	0.442421
YDL181W	INH1	#NAME?	-1.55551	1.9699	0.0131972	-1.70226	3.83211	2.18554	NA	0.0488402	0.00529186	0.990341	0.0139063	3.7067e-05	0.0016806	-10.3429	-1.55551	1.9699	0.0131972	-1.70226	3.83211	2.18554	0.0483528	0.0488402	0.00529186	0.990341	0.0139063	3.7067e-05	0.0016806
YDL182W	LYS20	1.67581	1.63552	0.207624	2.70278	0.692267	1.68237	2.19355	0.00493637	0.00799385	0.724257	0.000200616	0.213081	0.00436656	0.00033302	1.67581	1.63552	0.207624	2.70278	0.692267	1.68237	2.19355	0.00493637	0.00799385	0.724257	0.000200616	0.213081	0.00436656	0.00033302
YDL185W	VMA1	-0.489569	-0.423182	-0.140406	-0.360598	-0.382469	-0.476158	-0.787214	0.00989753	0.0270542	0.442348	0.0467651	0.0335794	0.0105442	0.000138404	-0.489569	-0.423182	-0.140406	-0.360598	-0.382469	-0.476158	-0.787214	0.00989753	0.0270542	0.442348	0.0467651	0.0335794	0.0105442	0.000138404
YDL188C	PPH22	-1.20884	-0.513645	0.0216755	-0.482166	-0.191214	-0.0695833	-0.721821	0.0918206	0.502185	0.981157	0.511918	0.812792	0.941525	0.311089	-1.20884	-0.513645	0.0216755	-0.482166	-0.191214	-0.0695833	-0.721821	0.0918206	0.502185	0.981157	0.511918	0.812792	0.941525	0.311089
YDL189W	RBS1	-0.228137	-0.225063	-0.0904192	-0.000302076	-0.0795869	-0.50034	-0.626411	0.769007	0.715465	0.866255	0.99974	0.882166	0.3653	0.305381	-0.228137	-0.225063	-0.0904192	-0.000302076	-0.0795869	-0.50034	-0.626411	0.769007	0.715465	0.866255	0.99974	0.882166	0.3653	0.305381
YDL190C	UFD2	#NAME?	-0.478656	0.562093	-0.1326	0.386724	-0.0709636	#NAME?	NA	0.545507	0.43971	0.880975	0.563012	0.932802	NA	-10.7638	-0.478656	0.562093	-0.1326	0.386724	-0.0709636	-12.8937	0.0264614	0.545507	0.43971	0.880975	0.563012	0.932802	0.0484491
YDL192W	ARF1	-0.380651	-0.945205	-0.748578	-0.492551	0.114476	0.851052	-0.689214	0.487869	0.0772734	0.129925	0.34824	0.844526	0.096554	0.132438	-0.380651	-0.945205	-0.748578	-0.492551	0.114476	0.851052	-0.689214	0.487869	0.0772734	0.129925	0.34824	0.844526	0.096554	0.132438
YDL193W	NUS1	-0.000832921	NA	NA	NA	NA	NA	NA	0.99967	NA	NA	NA	NA	NA	NA	-0.000832921	NA	NA	NA	NA	NA	NA	0.99967	NA	NA	NA	NA	NA	NA
YDL195W	SEC31	-0.587391	-0.612628	-0.324839	-0.429128	-1.10316	-0.167893	-0.968127	0.000905146	0.000896997	0.0315925	0.00895187	1.84382e-06	0.287712	4.65387e-06	-0.587391	-0.612628	-0.324839	-0.429128	-1.10316	-0.167893	-0.968127	0.000905146	0.000896997	0.0315925	0.00895187	1.84382e-06	0.287712	4.65387e-06
YDL198C	GGC1	-0.759581	0.0619691	-0.365601	2.95996	1.83284	0.154463	1.01064	0.0682095	0.915956	0.370941	2.09647e-06	0.000235664	0.755726	0.00966565	-0.759581	0.0619691	-0.365601	2.95996	1.83284	0.154463	1.01064	0.0682095	0.915956	0.370941	2.09647e-06	0.000235664	0.755726	0.00966565
YDL201W	TRM8	0.336026	-0.501829	-0.876093	-0.0993066	0.194919	-1.75774	-1.51459	0.474356	0.272106	0.0406181	0.854428	0.675462	0.000500737	0.000910315	0.336026	-0.501829	-0.876093	-0.0993066	0.194919	-1.75774	-1.51459	0.474356	0.272106	0.0406181	0.854428	0.675462	0.000500737	0.000910315
YDL202W	MRPL11	-0.804042	-0.164715	0.911298	#NAME?	-0.098468	1.22792	0.29407	0.422308	0.89254	0.222792	NA	0.926902	0.0903489	0.640174	-0.804042	-0.164715	0.911298	-10.1824	-0.098468	1.22792	0.29407	0.422308	0.89254	0.222792	0.0370802	0.926902	0.0903489	0.640174
YDL203C	ACK1	Inf	NA	NA	NA	NA	NA	NA	NA	NA	NA	NA	NA	NA	NA	8.09387	NA	NA	NA	NA	NA	NA	0.044525	NA	NA	NA	NA	NA	NA
YDL205C	HEM3	-0.669885	-1.35013	-0.46197	0.0494241	-0.506718	0.430426	-0.0917013	0.13399	0.00599252	0.282499	0.934512	0.257117	0.341994	0.840233	-0.669885	-1.35013	-0.46197	0.0494241	-0.506718	0.430426	-0.0917013	0.13399	0.00599252	0.282499	0.934512	0.257117	0.341994	0.840233
YDL208W	NHP2	0.441699	-0.429872	-0.58346	0.155364	0.535688	-0.190448	-0.834403	0.574095	0.589432	0.418685	0.860748	0.473791	0.83379	0.193707	0.441699	-0.429872	-0.58346	0.155364	0.535688	-0.190448	-0.834403	0.574095	0.589432	0.418685	0.860748	0.473791	0.83379	0.193707
YDL209C	CWC2	#NAME?	#NAME?	#NAME?	#NAME?	#NAME?	#NAME?	#NAME?	NA	NA	NA	NA	NA	NA	NA	-8.79141	-8.38768	-9.03348	-7.40919	-7.74893	-7.04938	-10.9213	0.0292842	0.0148774	0.0238088	0.0219862	0.0298511	0.0230938	0.0379135
YDL212W	SHR3	0.476214	-0.681981	-0.906849	-0.54633	#NAME?	-0.990818	-0.81588	0.600667	0.311034	0.190634	0.397577	NA	0.171391	0.286601	0.476214	-0.681981	-0.906849	-0.54633	-7.63126	-0.990818	-0.81588	0.600667	0.311034	0.190634	0.397577	0.0276723	0.171391	0.286601
YDL213C	NOP6	-0.51419	-0.430536	-0.537225	-0.889845	-0.40323	-1.19263	-1.03888	0.15177	0.238351	0.114874	0.0155871	0.258138	0.00188502	0.00275772	-0.51419	-0.430536	-0.537225	-0.889845	-0.40323	-1.19263	-1.03888	0.15177	0.238351	0.114874	0.0155871	0.258138	0.00188502	0.00275772
YDL215C	GDH2	#NAME?	0.100877	0.629646	1.66962	#NAME?	1.04362	#NAME?	NA	0.953434	0.674013	0.360463	NA	0.454997	NA	-7.53316	0.100877	0.629646	1.66962	-6.49068	1.04362	-9.6631	0.0105308	0.953434	0.674013	0.360463	0.0188928	0.454997	0.0398644
YDL219W	DTD1	-0.332664	0.24401	0.0633942	0.422786	-0.0843358	-0.429925	-0.78735	0.748007	0.825834	0.959974	0.662575	0.932717	0.675778	0.327401	-0.332664	0.24401	0.0633942	0.422786	-0.0843358	-0.429925	-0.78735	0.748007	0.825834	0.959974	0.662575	0.932717	0.675778	0.327401
YDL223C	HBT1	0.0537373	0.261185	5.10883	0.150235	0.0880721	0.454688	0.817133	0.919622	0.560609	5.15659e-08	0.743566	0.887851	0.277345	0.0306561	0.0537373	0.261185	5.10883	0.150235	0.0880721	0.454688	0.817133	0.919622	0.560609	5.15659e-08	0.743566	0.887851	0.277345	0.0306561
YDL224C	WHI4	#NAME?	0.191929	0.404599	#NAME?	-0.273221	0.0697754	-0.0446323	NA	0.857647	0.542083	NA	0.71657	0.939095	0.954275	-6.09792	0.191929	0.404599	-4.7157	-0.273221	0.0697754	-0.0446323	0.0201109	0.857647	0.542083	0.0338217	0.71657	0.939095	0.954275
YDL225W	SHS1	-0.969005	-0.96751	-0.59452	-0.303551	-1.24419	-0.921521	-0.934186	0.00842789	0.010625	0.0755174	0.393305	0.00131124	0.0101291	0.00524777	-0.969005	-0.96751	-0.59452	-0.303551	-1.24419	-0.921521	-0.934186	0.00842789	0.010625	0.0755174	0.393305	0.00131124	0.0101291	0.00524777
YDL226C	GCS1	-0.789884	-0.509565	-0.270885	-0.277165	-0.571397	-0.47435	-0.567796	0.00282654	0.0456608	0.252814	0.252954	0.0196582	0.0507294	0.0126328	-0.789884	-0.509565	-0.270885	-0.277165	-0.571397	-0.47435	-0.567796	0.00282654	0.0456608	0.252814	0.252954	0.0196582	0.0507294	0.0126328
YDL229W	SSB1	-0.62601	-1.39203	-1.2541	-1.28841	-1.11546	-1.4952	-1.45126	0.0454261	0.000388522	0.000385275	0.000585705	0.00126519	7.63066e-05	7.61052e-05	-0.62601	-1.39203	-1.2541	-1.28841	-1.11546	-1.4952	-1.45126	0.0454261	0.000388522	0.000385275	0.000585705	0.00126519	7.63066e-05	7.61052e-05
YDL235C	YPD1	0.272517	0.63969	-0.712294	-0.00766267	-0.187729	0.165212	-0.304072	0.735166	0.323762	0.290995	0.992142	0.788506	0.833233	0.646623	0.272517	0.63969	-0.712294	-0.00766267	-0.187729	0.165212	-0.304072	0.735166	0.323762	0.290995	0.992142	0.788506	0.833233	0.646623
YDL236W	PHO13	-0.816752	-0.795444	-1.0137	-1.27813	-1.06257	0.00783607	-0.891115	0.0286732	0.0400348	0.00664032	0.00208072	0.00560658	0.988076	0.00993721	-0.816752	-0.795444	-1.0137	-1.27813	-1.06257	0.00783607	-0.891115	0.0286732	0.0400348	0.00664032	0.00208072	0.00560658	0.988076	0.00993721
YDL237W	AIM6	-1.40708	-1.47223	-0.550157	-1.07624	-0.925453	-1.33129	-1.62749	0.00188316	0.00190305	0.162757	0.0124473	0.0240342	0.0025065	0.000284795	-1.40708	-1.47223	-0.550157	-1.07624	-0.925453	-1.33129	-1.62749	0.00188316	0.00190305	0.162757	0.0124473	0.0240342	0.0025065	0.000284795
YDR001C	NTH1	-0.686512	0.508805	1.24845	0.0864376	-0.451684	2.1556	0.193925	0.227028	0.386358	0.0229778	0.902007	0.428185	0.000632464	0.723525	-0.686512	0.508805	1.24845	0.0864376	-0.451684	2.1556	0.193925	0.227028	0.386358	0.0229778	0.902007	0.428185	0.000632464	0.723525
YDR002W	YRB1	-0.426334	-0.523657	-0.51642	-0.82194	-0.355575	-0.659635	-0.716351	0.032043	0.0131746	0.0090657	0.000535337	0.0655008	0.0019106	0.000538056	-0.426334	-0.523657	-0.51642	-0.82194	-0.355575	-0.659635	-0.716351	0.032043	0.0131746	0.0090657	0.000535337	0.0655008	0.0019106	0.000538056
YDR007W	TRP1	-0.483148	-0.966113	-0.424637	#NAME?	#NAME?	-0.0906085	#NAME?	0.63172	0.219219	0.524154	NA	NA	0.916871	NA	-0.483148	-0.966113	-0.424637	-11.5352	-11.875	-0.0906085	-15.0474	0.63172	0.219219	0.524154	0.0431127	0.0377742	0.916871	0.0249133
YDR011W	SNQ2	-0.898619	0.209995	-0.353942	-0.561057	-0.162798	-1.12671	-1.24717	0.342651	0.818914	0.618447	0.422152	0.844942	0.139153	0.0503477	-0.898619	0.209995	-0.353942	-0.561057	-0.162798	-1.12671	-1.24717	0.342651	0.818914	0.618447	0.422152	0.844942	0.139153	0.0503477
YDR012W	RPL4B	0.67129	-0.123193	-1.12785	-1.17624	0.0435886	0.205323	-0.846918	0.502301	0.922259	0.210126	0.202248	0.964824	0.861395	0.313172	0.67129	-0.123193	-1.12785	-1.17624	0.0435886	0.205323	-0.846918	0.502301	0.922259	0.210126	0.202248	0.964824	0.861395	0.313172
YDR017C	KCS1	#NAME?	0.716446	0.211119	#NAME?	0.102487	#NAME?	-0.0172535	NA	0.316213	0.73273	NA	0.886898	NA	0.984724	-8.44843	0.716446	0.211119	-7.06621	0.102487	-6.7064	-0.0172535	0.0247056	0.316213	0.73273	0.0148532	0.886898	0.0224349	0.984724
YDR019C	GCV1	-2.10802	-0.849288	0.0311132	1.61356	-2.09107	-1.16955	0.531791	4.81969e-05	0.0434901	0.95156	0.000686731	4.4539e-05	0.00536922	0.133941	-2.10802	-0.849288	0.0311132	1.61356	-2.09107	-1.16955	0.531791	4.81969e-05	0.0434901	0.95156	0.000686731	4.4539e-05	0.00536922	0.133941
YDR020C	DAS2	-0.256421	-0.48345	-0.281031	-1.03233	-0.723189	-0.646715	-1.14223	0.80351	0.621239	0.765932	0.419294	0.477927	0.547784	0.19662	-0.256421	-0.48345	-0.281031	-1.03233	-0.723189	-0.646715	-1.14223	0.80351	0.621239	0.765932	0.419294	0.477927	0.547784	0.19662
YDR021W	FAL1	1.14452	-0.219971	0.251031	0.712526	-0.574491	0.202579	0.749739	0.259114	0.862671	0.821303	0.493073	0.581934	0.873589	0.410096	1.14452	-0.219971	0.251031	0.712526	-0.574491	0.202579	0.749739	0.259114	0.862671	0.821303	0.493073	0.581934	0.873589	0.410096
YDR023W	SES1	-0.0101822	-0.372826	-0.651434	-0.343054	-0.14467	-0.552614	-0.616863	0.968589	0.0401646	0.00067773	0.0466303	0.413407	0.00270948	0.000644107	-0.0101822	-0.372826	-0.651434	-0.343054	-0.14467	-0.552614	-0.616863	0.968589	0.0401646	0.00067773	0.0466303	0.413407	0.00270948	0.000644107
YDR028C	REG1	-0.67973	-0.0229682	0.860949	-0.465695	-0.442532	0.965853	0.325099	0.405693	0.98255	0.25649	0.573652	0.587662	0.21648	0.665686	-0.67973	-0.0229682	0.860949	-0.465695	-0.442532	0.965853	0.325099	0.405693	0.98255	0.25649	0.573652	0.587662	0.21648	0.665686
YDR031W	MIX14	-0.740575	-0.293025	1.49233	0.413275	-0.883627	0.390407	0.530948	0.286029	0.775212	0.0190101	0.508946	0.307002	0.552373	0.329171	-0.740575	-0.293025	1.49233	0.413275	-0.883627	0.390407	0.530948	0.286029	0.775212	0.0190101	0.508946	0.307002	0.552373	0.329171
YDR032C	PST2	-1.6472	-0.338235	0.758644	-0.0353082	-0.848812	0.543631	-0.315055	1.45679e-07	0.0832434	0.000404013	0.880975	0.000206007	0.00601173	0.0616226	-1.6472	-0.338235	0.758644	-0.0353082	-0.848812	0.543631	-0.315055	1.45679e-07	0.0832434	0.000404013	0.880975	0.000206007	0.00601173	0.0616226
YDR033W	MRH1	0.337233	1.00567	-0.57222	0.445097	0.138746	0.618381	0.681367	0.624741	0.114098	0.35147	0.493373	0.844526	0.332993	0.220286	0.337233	1.00567	-0.57222	0.445097	0.138746	0.618381	0.681367	0.624741	0.114098	0.35147	0.493373	0.844526	0.332993	0.220286
YDR035W	ARO3	-0.371446	-0.162598	-0.40222	1.60072	0.650336	0.304653	0.793255	0.354996	0.720132	0.287437	0.000598036	0.0892285	0.459495	0.0251713	-0.371446	-0.162598	-0.40222	1.60072	0.650336	0.304653	0.793255	0.354996	0.720132	0.287437	0.000598036	0.0892285	0.459495	0.0251713
YDR036C	EHD3	-0.881998	-0.778458	-0.43851	-1.80143	-1.68186	1.36719	-0.630329	0.345523	0.417487	0.681515	0.079946	0.0989747	0.136013	0.60133	-0.881998	-0.778458	-0.43851	-1.80143	-1.68186	1.36719	-0.630329	0.345523	0.417487	0.681515	0.079946	0.0989747	0.136013	0.60133
YDR037W	KRS1	0.184159	-0.0991002	-0.766374	-0.11002	-0.213933	-0.589929	-0.854397	0.453558	0.713423	0.00177208	0.659695	0.362557	0.0121752	0.000472492	0.184159	-0.0991002	-0.766374	-0.11002	-0.213933	-0.589929	-0.854397	0.453558	0.713423	0.00177208	0.659695	0.362557	0.0121752	0.000472492
YDR044W	HEM13	0.172746	0.270904	0.270732	-0.3153	-0.133698	0.665265	0.0676986	0.587963	0.380047	0.345347	0.27936	0.664128	0.0234026	0.821308	0.172746	0.270904	0.270732	-0.3153	-0.133698	0.665265	0.0676986	0.587963	0.380047	0.345347	0.27936	0.664128	0.0234026	0.821308
YDR045C	RPC11	-0.544002	-1.01614	-0.757342	-0.722455	-0.647665	-0.72045	-0.920611	0.0345989	0.00125618	0.0022335	0.00444428	0.00694338	0.00721361	0.000356497	-0.544002	-1.01614	-0.757342	-0.722455	-0.647665	-0.72045	-0.920611	0.0345989	0.00125618	0.0022335	0.00444428	0.00694338	0.00721361	0.000356497
YDR046C	BAP3	#NAME?	#NAME?	#NAME?	#NAME?	#NAME?	0.191384	#NAME?	NA	NA	NA	NA	NA	0.917219	NA	-14.8292	-14.4255	-15.0713	-13.447	-13.7867	0.191384	-16.9591	0.0431951	0.0217573	0.0147291	0.0176092	0.0147228	0.917219	0.0436863
YDR047W	HEM12	-0.330928	#NAME?	#NAME?	#NAME?	0.867432	0.228539	-0.654762	0.549495	NA	NA	NA	0.219796	0.665886	0.269651	-0.330928	-9.14731	-9.79312	-8.16882	0.867432	0.228539	-0.654762	0.549495	0.0478025	0.0214131	0.0131617	0.219796	0.665886	0.269651
YDR049W	VMS1	Inf	NA	NA	Inf	NA	NA	NA	NA	NA	NA	NA	NA	NA	NA	6.8649	NA	NA	9.14194	NA	NA	NA	0.0469981	NA	NA	0.0259287	NA	NA	NA
YDR050C	TPI1	0.10356	0.420077	-0.0591829	-0.498051	0.107281	0.688636	0.567076	0.717639	0.0978511	0.828081	0.045171	0.68454	0.00734815	0.0142722	0.10356	0.420077	-0.0591829	-0.498051	0.107281	0.688636	0.567076	0.717639	0.0978511	0.828081	0.045171	0.68454	0.00734815	0.0142722
YDR051C	DET1	-0.848505	-0.775624	-0.735031	-0.747999	-0.482098	0.169159	-0.561844	0.113923	0.152375	0.15099	0.152313	0.377562	0.797679	0.236441	-0.848505	-0.775624	-0.735031	-0.747999	-0.482098	0.169159	-0.561844	0.113923	0.152375	0.15099	0.152313	0.377562	0.797679	0.236441
YDR054C	CDC34	-0.357809	-0.807499	0.355672	-0.81093	-0.273622	-0.0199863	-0.749067	0.675634	0.370587	0.693969	0.29023	0.775625	0.984858	0.272363	-0.357809	-0.807499	0.355672	-0.81093	-0.273622	-0.0199863	-0.749067	0.675634	0.370587	0.693969	0.29023	0.775625	0.984858	0.272363
YDR055W	PST1	-0.47449	0.616063	2.04792	0.0563705	-1.82752	0.934963	1.19914	0.667093	0.407738	0.00672789	0.955991	0.0675256	0.185823	0.0601948	-0.47449	0.616063	2.04792	0.0563705	-1.82752	0.934963	1.19914	0.667093	0.407738	0.00672789	0.955991	0.0675256	0.185823	0.0601948
YDR056C	EMC10	-0.502348	-1.42937	-0.216958	-0.0164213	-0.985832	-0.374964	-2.23121	0.477282	0.0743736	0.701185	0.987168	0.0753249	0.475974	0.00783291	-0.502348	-1.42937	-0.216958	-0.0164213	-0.985832	-0.374964	-2.23121	0.477282	0.0743736	0.701185	0.987168	0.0753249	0.475974	0.00783291
YDR057W	YOS9	-0.330727	-0.294072	0.0592629	-0.409215	#NAME?	0.442513	-0.0959692	0.677809	0.721349	0.946533	0.630682	NA	0.571425	0.898302	-0.330727	-0.294072	0.0592629	-0.409215	-9.78314	0.442513	-0.0959692	0.677809	0.721349	0.946533	0.630682	0.0344339	0.571425	0.898302
YDR060W	MAK21	0.595955	-0.63318	-1.31094	-0.947395	0.444635	-0.985154	-1.48613	0.230361	0.206471	0.00780815	0.0507024	0.372238	0.0423314	0.00210686	0.595955	-0.63318	-1.31094	-0.947395	0.444635	-0.985154	-1.48613	0.230361	0.206471	0.00780815	0.0507024	0.372238	0.0423314	0.00210686
YDR061W	YDR061W	-0.982373	-0.489625	-1.05107	#NAME?	-0.712428	0.022312	-1.20522	0.234151	0.457457	0.100308	NA	0.26253	0.976089	0.101157	-0.982373	-0.489625	-1.05107	-10.1746	-0.712428	0.022312	-1.20522	0.234151	0.457457	0.100308	0.0388371	0.26253	0.976089	0.101157
YDR062W	LCB2	0.110904	-0.0171595	-0.558553	-0.451555	0.444057	-0.195285	-0.320379	0.87092	0.981373	0.302959	0.427677	0.38338	0.733851	0.627988	0.110904	-0.0171595	-0.558553	-0.451555	0.444057	-0.195285	-0.320379	0.87092	0.981373	0.302959	0.427677	0.38338	0.733851	0.627988
YDR063W	AIM7	-0.760747	0.0485884	0.867226	0.392978	-1.22169	0.503035	-0.951782	0.293954	0.959869	0.205876	0.601257	0.226984	0.511683	0.13211	-0.760747	0.0485884	0.867226	0.392978	-1.22169	0.503035	-0.951782	0.293954	0.959869	0.205876	0.601257	0.226984	0.511683	0.13211
YDR064W	RPS13	-0.130527	-0.183189	-0.393524	-0.340226	-0.0544166	-0.415739	-0.648601	0.623694	0.481516	0.0887139	0.151223	0.84389	0.0832373	0.00505123	-0.130527	-0.183189	-0.393524	-0.340226	-0.0544166	-0.415739	-0.648601	0.623694	0.481516	0.0887139	0.151223	0.84389	0.0832373	0.00505123
YDR068W	DOS2	-0.739389	0.585902	-0.0174323	0.381327	0.316984	0.15338	-0.0807655	0.206615	0.16094	0.972656	0.403567	0.493784	0.828413	0.841634	-0.739389	0.585902	-0.0174323	0.381327	0.316984	0.15338	-0.0807655	0.206615	0.16094	0.972656	0.403567	0.493784	0.828413	0.841634
YDR070C	FMP16	0.492517	#NAME?	5.21219	1.68579	#NAME?	1.17344	0.0745978	0.693629	NA	0.00014595	0.0578266	NA	0.171886	0.934371	0.492517	-6.82711	5.21219	1.68579	-6.18837	1.17344	0.0745978	0.693629	0.0147869	0.00014595	0.0578266	0.0424726	0.171886	0.934371
YDR071C	PAA1	-0.311593	0.0297614	-0.0194004	-0.0226315	-0.44424	-0.0208719	-0.280952	0.286422	0.9397	0.957045	0.95667	0.114551	0.95841	0.27107	-0.311593	0.0297614	-0.0194004	-0.0226315	-0.44424	-0.0208719	-0.280952	0.286422	0.9397	0.957045	0.95667	0.114551	0.95841	0.27107
YDR074W	TPS2	-2.42813	-0.971042	1.70528	-0.432215	-1.76451	0.688992	-0.738068	2.9535e-06	0.0111565	8.76041e-05	0.217269	6.87353e-05	0.0507294	0.022605	-2.42813	-0.971042	1.70528	-0.432215	-1.76451	0.688992	-0.738068	2.9535e-06	0.0111565	8.76041e-05	0.217269	6.87353e-05	0.0507294	0.022605
YDR083W	RRP8	-1.70667	-1.72398	-1.79714	-1.60654	-0.414611	-2.05231	-2.06507	0.0779614	0.0838102	0.0556831	0.08995	0.662426	0.0379763	0.0227629	-1.70667	-1.72398	-1.79714	-1.60654	-0.414611	-2.05231	-2.06507	0.0779614	0.0838102	0.0556831	0.08995	0.662426	0.0379763	0.0227629
YDR084C	TVP23	-0.485735	-0.882326	-1.05344	#NAME?	-0.0914031	-0.0247985	-0.930301	0.291032	0.0439559	0.0156426	NA	0.800729	0.958621	0.0177644	-0.485735	-0.882326	-1.05344	-8.99235	-0.0914031	-0.0247985	-0.930301	0.291032	0.0439559	0.0156426	0.0366097	0.800729	0.958621	0.0177644
YDR086C	SSS1	-0.502358	0.171175	-0.358274	-0.487269	0.156766	-0.398372	-0.47625	0.106729	0.618952	0.230977	0.109974	0.626813	0.194568	0.081867	-0.502358	0.171175	-0.358274	-0.487269	0.156766	-0.398372	-0.47625	0.106729	0.618952	0.230977	0.109974	0.626813	0.194568	0.081867
YDR087C	RRP1	-1.2499	-1.2497	-1.789	-0.484556	-1.28556	-0.702918	#NAME?	0.212445	0.166317	0.135862	0.593942	0.188971	0.43731	NA	-1.2499	-1.2497	-1.789	-0.484556	-1.28556	-0.702918	-14.617	0.212445	0.166317	0.135862	0.593942	0.188971	0.43731	0.0379568
YDR089W	VTC5	0.0577418	-0.390496	-0.324498	-0.473009	#NAME?	0.202069	-0.548579	0.969483	0.699894	0.772917	0.611915	NA	0.878065	0.587875	0.0577418	-0.390496	-0.324498	-0.473009	-10.4726	0.202069	-0.548579	0.969483	0.699894	0.772917	0.611915	0.0319036	0.878065	0.587875
YDR091C	RLI1	-0.0978617	-0.460613	-1.0759	-0.559154	-0.110868	-0.892903	-1.41175	0.761208	0.100708	0.000499535	0.0428959	0.707869	0.00250845	3.27626e-05	-0.0978617	-0.460613	-1.0759	-0.559154	-0.110868	-0.892903	-1.41175	0.761208	0.100708	0.000499535	0.0428959	0.707869	0.00250845	3.27626e-05
YDR092W	UBC13	-0.230811	0.506785	0.419293	0.0926203	0.0914641	0.554339	0.195309	0.639586	0.272118	0.337879	0.867025	0.859339	0.213835	0.648181	-0.230811	0.506785	0.419293	0.0926203	0.0914641	0.554339	0.195309	0.639586	0.272118	0.337879	0.867025	0.859339	0.213835	0.648181
YDR097C	MSH6	-0.482656	-0.219709	-1.05291	-0.837235	-0.937006	-0.121164	-0.3803	0.47955	0.80361	0.0938593	0.367368	0.194367	0.883023	0.522947	-0.482656	-0.219709	-1.05291	-0.837235	-0.937006	-0.121164	-0.3803	0.47955	0.80361	0.0938593	0.367368	0.194367	0.883023	0.522947
YDR098C	GRX3	0.414531	0.861443	-0.573739	-0.515942	0.217382	-0.251702	-0.534112	0.138181	0.00526972	0.033645	0.0602054	0.442717	0.379156	0.0326769	0.414531	0.861443	-0.573739	-0.515942	0.217382	-0.251702	-0.534112	0.138181	0.00526972	0.033645	0.0602054	0.442717	0.379156	0.0326769
YDR099W	BMH2	-0.224531	0.894261	0.775942	0.520503	0.447615	0.254396	0.285551	0.331921	0.000894822	0.00135455	0.0235312	0.0440226	0.263129	0.152345	-0.224531	0.894261	0.775942	0.520503	0.447615	0.254396	0.285551	0.331921	0.000894822	0.00135455	0.0235312	0.0440226	0.263129	0.152345
YDR101C	ARX1	-0.217381	-0.271907	-1.43968	-1.23689	-0.194073	-0.390765	-1.58091	0.520205	0.41363	0.000129897	0.000799739	0.552048	0.212939	3.86349e-05	-0.217381	-0.271907	-1.43968	-1.23689	-0.194073	-0.390765	-1.58091	0.520205	0.41363	0.000129897	0.000799739	0.552048	0.212939	3.86349e-05
YDR107C	TMN2	-0.611774	-0.804825	-0.0495936	0.277381	0.225496	0.0920794	-0.26521	0.196893	0.0915269	0.929402	0.571911	0.645333	0.876489	0.539788	-0.611774	-0.804825	-0.0495936	0.277381	0.225496	0.0920794	-0.26521	0.196893	0.0915269	0.929402	0.571911	0.645333	0.876489	0.539788
YDR111C	ALT2	0.443147	-0.15056	0.226195	0.00926694	-0.322802	0.206385	#NAME?	0.459279	0.849387	0.701792	0.990753	0.699873	0.83379	NA	0.443147	-0.15056	0.226195	0.00926694	-0.322802	0.206385	-12.8791	0.459279	0.849387	0.701792	0.990753	0.699873	0.83379	0.0203828
YDR116C	MRPL1	-0.0794376	0.177841	0.342949	#NAME?	#NAME?	1.17423	0.44517	0.932759	0.845662	0.609434	NA	NA	0.0842904	0.503297	-0.0794376	0.177841	0.342949	-9.97789	-10.3176	1.17423	0.44517	0.932759	0.845662	0.609434	0.0286913	0.0351091	0.0842904	0.503297
YDR117C	TMA64	-1.07924	-1.12444	-1.34512	-0.661527	-0.942147	-1.87509	-1.28862	0.167682	0.151227	0.0694553	0.399878	0.222186	0.0164119	0.0602058	-1.07924	-1.12444	-1.34512	-0.661527	-0.942147	-1.87509	-1.28862	0.167682	0.151227	0.0694553	0.399878	0.222186	0.0164119	0.0602058
YDR119W	VBA4	#NAME?	#NAME?	0.268074	#NAME?	#NAME?	0.807418	#NAME?	NA	NA	0.181896	NA	NA	0.0909401	NA	-7.2764	-6.87267	0.268074	-5.89418	-6.23392	0.807418	-9.40634	0.0248063	0.0217186	0.181896	0.0307289	0.0456417	0.0909401	0.0407336
YDR120C	TRM1	0.362264	-0.222712	-0.959382	-0.612326	-0.304225	0.102428	-0.789958	0.433419	0.654765	0.0254936	0.153285	0.504598	0.852589	0.0440903	0.362264	-0.222712	-0.959382	-0.612326	-0.304225	0.102428	-0.789958	0.433419	0.654765	0.0254936	0.153285	0.504598	0.852589	0.0440903
YDR121W	DPB4	-0.676627	-0.351134	-0.194086	-0.079519	-0.853148	-0.245343	-0.127365	0.490313	0.744633	0.867584	0.951551	0.366335	0.833716	0.907221	-0.676627	-0.351134	-0.194086	-0.079519	-0.853148	-0.245343	-0.127365	0.490313	0.744633	0.867584	0.951551	0.366335	0.833716	0.907221
YDR127W	ARO1	-0.491815	-0.389106	-0.60109	0.43625	0.559158	-0.39833	-0.67042	0.0472032	0.121832	0.0145558	0.0733097	0.0234212	0.103619	0.00473987	-0.491815	-0.389106	-0.60109	0.43625	0.559158	-0.39833	-0.67042	0.0472032	0.121832	0.0145558	0.0733097	0.0234212	0.103619	0.00473987
YDR129C	SAC6	-0.381547	-0.294542	-0.403726	-0.599112	-0.131009	1.00224	-1.06501	0.132331	0.255643	0.0934315	0.0203396	0.615572	0.000488862	0.000164655	-0.381547	-0.294542	-0.403726	-0.599112	-0.131009	1.00224	-1.06501	0.132331	0.255643	0.0934315	0.0203396	0.615572	0.000488862	0.000164655
YDR135C	YCF1	0.582135	0.473193	0.147065	-0.162622	0.277989	-0.0944186	-0.338506	0.186959	0.293881	0.752091	0.738825	0.54009	0.861686	0.390584	0.582135	0.473193	0.147065	-0.162622	0.277989	-0.0944186	-0.338506	0.186959	0.293881	0.752091	0.738825	0.54009	0.861686	0.390584
YDR138W	HPR1	-0.161631	-1.83159	0.392998	-1.13546	-1.05638	0.124136	-0.225248	0.968042	0.535912	0.863352	0.593942	0.64865	0.961244	0.924648	-0.161631	-1.83159	0.392998	-1.13546	-1.05638	0.124136	-0.225248	0.968042	0.535912	0.863352	0.593942	0.64865	0.961244	0.924648
YDR139C	RUB1	-0.910925	0.111613	-0.671668	-0.996024	0.34966	0.328721	-0.257046	0.0708809	0.883751	0.151283	0.0497048	0.418562	0.461739	0.649754	-0.910925	0.111613	-0.671668	-0.996024	0.34966	0.328721	-0.257046	0.0708809	0.883751	0.151283	0.0497048	0.418562	0.461739	0.649754
YDR141C	DOP1	-0.0585465	NA	NA	NA	0.877164	0.428434	NA	0.968589	NA	NA	NA	0.385651	0.692491	NA	-0.0585465	NA	NA	NA	0.877164	0.428434	NA	0.968589	NA	NA	NA	0.385651	0.692491	NA
YDR143C	SAN1	-0.438651	-1.02961	-0.838413	-0.618745	-0.471283	-1.7209	-0.877037	0.621944	0.229437	0.339856	0.500857	0.608063	0.128202	0.273836	-0.438651	-1.02961	-0.838413	-0.618745	-0.471283	-1.7209	-0.877037	0.621944	0.229437	0.339856	0.500857	0.608063	0.128202	0.273836
YDR144C	MKC7	-0.249924	-1.48292	-1.18749	-1.60214	-0.0501991	-1.00976	#NAME?	0.778409	0.0712097	0.154867	0.0672143	0.951056	0.245703	NA	-0.249924	-1.48292	-1.18749	-1.60214	-0.0501991	-1.00976	-15.4787	0.778409	0.0712097	0.154867	0.0672143	0.951056	0.245703	0.0103794
YDR145W	TAF12	-0.776003	-0.990464	-0.7451	-0.574283	-1.09109	-0.612368	-0.612487	0.332074	0.216675	0.327815	0.473502	0.154052	0.45767	0.38606	-0.776003	-0.990464	-0.7451	-0.574283	-1.09109	-0.612368	-0.612487	0.332074	0.216675	0.327815	0.473502	0.154052	0.45767	0.38606
YDR148C	KGD2	-1.13986	-1.26829	0.749721	-0.36277	-1.41651	1.89271	0.677012	8.97312e-05	5.56735e-05	0.00212362	0.112278	9.18308e-06	2.26381e-07	0.0028068	-1.13986	-1.26829	0.749721	-0.36277	-1.41651	1.89271	0.677012	8.97312e-05	5.56735e-05	0.00212362	0.112278	9.18308e-06	2.26381e-07	0.0028068
YDR150W	NUM1	-0.819806	-0.371503	-0.159596	-0.214953	-0.665778	-0.402148	-0.412953	0.0129288	0.260036	0.635182	0.516287	0.0352687	0.206673	0.144755	-0.819806	-0.371503	-0.159596	-0.214953	-0.665778	-0.402148	-0.412953	0.0129288	0.260036	0.635182	0.516287	0.0352687	0.206673	0.144755
YDR152W	GIR2	-0.468944	0.288486	-0.521177	-0.412282	-0.153926	-0.686435	-0.169569	0.375362	0.61217	0.292456	0.430909	0.788696	0.177307	0.737473	-0.468944	0.288486	-0.521177	-0.412282	-0.153926	-0.686435	-0.169569	0.375362	0.61217	0.292456	0.430909	0.788696	0.177307	0.737473
YDR153C	ENT5	-0.386215	-0.666342	-0.802163	-0.39852	-0.212768	-0.361865	-1.30114	0.492786	0.280341	0.117546	0.465442	0.707869	0.529925	0.0192476	-0.386215	-0.666342	-0.802163	-0.39852	-0.212768	-0.361865	-1.30114	0.492786	0.280341	0.117546	0.465442	0.707869	0.529925	0.0192476
YDR155C	CPR1	-0.443125	-0.099526	0.372167	-0.431143	-0.431157	-0.00922202	-0.00282608	0.0451502	0.699894	0.0769727	0.049405	0.0469737	0.976089	0.99194	-0.443125	-0.099526	0.372167	-0.431143	-0.431157	-0.00922202	-0.00282608	0.0451502	0.699894	0.0769727	0.049405	0.0469737	0.976089	0.99194
YDR156W	RPA14	-0.560719	-0.834912	-1.09303	-0.406695	-1.36194	-0.82636	-0.82306	0.577044	0.392594	0.220144	0.687238	0.135112	0.388256	0.321502	-0.560719	-0.834912	-1.09303	-0.406695	-1.36194	-0.82636	-0.82306	0.577044	0.392594	0.220144	0.687238	0.135112	0.388256	0.321502
YDR158W	HOM2	-0.266925	0.0726196	-0.0236872	1.54016	1.01701	-0.139406	0.854512	0.0538781	0.64073	0.880394	8.17367e-09	1.34267e-06	0.322344	4.8169e-06	-0.266925	0.0726196	-0.0236872	1.54016	1.01701	-0.139406	0.854512	0.0538781	0.64073	0.880394	8.17367e-09	1.34267e-06	0.322344	4.8169e-06
YDR161W	ACL4	0.265554	0.124469	-1.18939	-0.687255	-0.506882	-0.137265	-0.718237	0.702198	0.874836	0.0747367	0.260529	0.418541	0.874578	0.239421	0.265554	0.124469	-1.18939	-0.687255	-0.506882	-0.137265	-0.718237	0.702198	0.874836	0.0747367	0.260529	0.418541	0.874578	0.239421
YDR162C	NBP2	-0.127159	-0.0996983	-0.253414	-0.412968	-0.316661	0.838146	-0.351666	0.893519	0.888024	0.661458	0.613992	0.617028	0.135245	0.535159	-0.127159	-0.0996983	-0.253414	-0.412968	-0.316661	0.838146	-0.351666	0.893519	0.888024	0.661458	0.613992	0.617028	0.135245	0.535159
YDR163W	CWC15	-0.324222	#NAME?	-0.311745	-0.41813	-0.153563	-0.52613	-0.189892	0.341604	NA	0.483595	0.252954	0.678472	0.247908	0.526239	-0.324222	-5.63427	-0.311745	-0.41813	-0.153563	-0.52613	-0.189892	0.341604	0.0386363	0.483595	0.252954	0.678472	0.247908	0.526239
YDR164C	SEC1	0.0676023	0.308169	NA	-0.669851	0.366396	NA	NA	0.969483	0.836637	NA	0.600733	0.786986	NA	NA	0.0676023	0.308169	NA	-0.669851	0.366396	NA	NA	0.969483	0.836637	NA	0.600733	0.786986	NA	NA
YDR165W	TRM82	-0.362047	-1.20517	-2.27047	-1.6922	-1.2229	-2.48753	-2.77659	0.588667	0.0604381	0.000935426	0.0101027	0.044997	0.00122935	0.000118317	-0.362047	-1.20517	-2.27047	-1.6922	-1.2229	-2.48753	-2.77659	0.588667	0.0604381	0.000935426	0.0101027	0.044997	0.00122935	0.000118317
YDR166C	SEC5	Inf	NA	Inf	Inf	NA	NA	NA	NA	NA	NA	NA	NA	NA	NA	8.10951	NA	7.64761	8.75727	NA	NA	NA	0.0340358	NA	0.0462985	0.0282451	NA	NA	NA
YDR167W	TAF10	-1.55672	-1.1983	-0.792432	-1.12045	-0.984829	-0.670706	-1.3478	0.027591	0.0915269	0.239631	0.101858	0.149758	0.346042	0.0317237	-1.55672	-1.1983	-0.792432	-1.12045	-0.984829	-0.670706	-1.3478	0.027591	0.0915269	0.239631	0.101858	0.149758	0.346042	0.0317237
YDR168W	CDC37	-0.877972	-0.288828	-0.385877	-0.804593	-0.918276	0.267451	-0.419041	0.012811	0.426404	0.243614	0.0212379	0.00870302	0.458506	0.166158	-0.877972	-0.288828	-0.385877	-0.804593	-0.918276	0.267451	-0.419041	0.012811	0.426404	0.243614	0.0212379	0.00870302	0.458506	0.166158
YDR169C	STB3	-0.16795	0.0277503	-0.0922481	0.437757	-0.398055	0.667227	0.145439	0.805581	0.973717	0.890087	0.462963	0.510507	0.25423	0.807664	-0.16795	0.0277503	-0.0922481	0.437757	-0.398055	0.667227	0.145439	0.805581	0.973717	0.890087	0.462963	0.510507	0.25423	0.807664
YDR170C	SEC7	-0.342512	-0.564579	-0.581253	-0.615157	-0.147875	-0.69788	-1.49115	0.543625	0.240543	0.195877	0.179837	0.777276	0.133	0.00384764	-0.342512	-0.564579	-0.581253	-0.615157	-0.147875	-0.69788	-1.49115	0.543625	0.240543	0.195877	0.179837	0.777276	0.133	0.00384764
YDR171W	HSP42	-1.01994	-0.119057	1.79792	-0.0360992	-0.731216	0.800258	0.428365	0.239779	0.910076	0.0180362	0.974064	0.343632	0.30122	0.545566	-1.01994	-0.119057	1.79792	-0.0360992	-0.731216	0.800258	0.428365	0.239779	0.910076	0.0180362	0.974064	0.343632	0.30122	0.545566
YDR172W	SUP35	-0.538876	-0.523397	-0.877327	-0.800295	-0.733249	-0.506192	-1.50449	0.00721619	0.0108671	0.000121889	0.000520308	0.000747104	0.00951239	6.03284e-07	-0.538876	-0.523397	-0.877327	-0.800295	-0.733249	-0.506192	-1.50449	0.00721619	0.0108671	0.000121889	0.000520308	0.000747104	0.00951239	6.03284e-07
YDR173C	ARG82	-1.00176	0.00914498	-0.352545	0.5551	-1.25108	0.8159	1.19729	0.0370656	0.985719	0.501761	0.40346	0.0205021	0.0810387	0.00864264	-1.00176	0.00914498	-0.352545	0.5551	-1.25108	0.8159	1.19729	0.0370656	0.985719	0.501761	0.40346	0.0205021	0.0810387	0.00864264
YDR174W	HMO1	-0.204327	-0.66518	-0.556875	0.0159522	-0.386722	0.382631	-0.883107	0.65705	0.114098	0.161155	0.98016	0.35892	0.36853	0.0203014	-0.204327	-0.66518	-0.556875	0.0159522	-0.386722	0.382631	-0.883107	0.65705	0.114098	0.161155	0.98016	0.35892	0.36853	0.0203014
YDR175C	RSM24	-1.37856	-2.008	-0.23514	-0.67949	-0.879103	0.265985	-1.11943	0.212941	0.0339738	0.772496	0.381759	0.421648	0.770273	0.102386	-1.37856	-2.008	-0.23514	-0.67949	-0.879103	0.265985	-1.11943	0.212941	0.0339738	0.772496	0.381759	0.421648	0.770273	0.102386
YDR176W	NGG1	#NAME?	#NAME?	#NAME?	-0.864489	#NAME?	-1.27396	#NAME?	NA	NA	NA	0.880994	NA	0.833472	NA	-10.0658	-9.66211	-10.3079	-0.864489	-9.02337	-1.27396	-12.1958	0.0102563	0.0413572	0.0379217	0.880994	0.0241224	0.833472	0.0105461
YDR177W	UBC1	-0.311266	-0.575712	-0.23409	-0.20503	-0.609965	-0.134251	-0.262559	0.301043	0.0599096	0.426617	0.500857	0.0364486	0.691835	0.321187	-0.311266	-0.575712	-0.23409	-0.20503	-0.609965	-0.134251	-0.262559	0.301043	0.0599096	0.426617	0.500857	0.0364486	0.691835	0.321187
YDR186C	SND1	0.258291	NA	0.29469	-0.572152	NA	NA	NA	0.681123	NA	0.619025	0.36636	NA	NA	NA	0.258291	NA	0.29469	-0.572152	NA	NA	NA	0.681123	NA	0.619025	0.36636	NA	NA	NA
YDR188W	CCT6	0.606376	0.0277223	-0.675235	-0.551333	-0.0254297	-0.228861	-1.02393	0.196908	0.964736	0.126589	0.229414	0.957626	0.668004	0.0166316	0.606376	0.0277223	-0.675235	-0.551333	-0.0254297	-0.228861	-1.02393	0.196908	0.964736	0.126589	0.229414	0.957626	0.668004	0.0166316
YDR189W	SLY1	-0.667774	-0.687838	-0.643367	-0.422181	-1.15794	-0.917194	-1.23663	0.066785	0.0675688	0.064998	0.242569	0.00289537	0.012984	0.000942198	-0.667774	-0.687838	-0.643367	-0.422181	-1.15794	-0.917194	-1.23663	0.066785	0.0675688	0.064998	0.242569	0.00289537	0.012984	0.000942198
YDR190C	RVB1	-0.457166	-0.427728	-0.460682	-0.237883	-0.689017	-0.231612	-0.973533	0.0197509	0.0345364	0.0156626	0.208838	0.00123272	0.228152	3.55261e-05	-0.457166	-0.427728	-0.460682	-0.237883	-0.689017	-0.231612	-0.973533	0.0197509	0.0345364	0.0156626	0.208838	0.00123272	0.228152	3.55261e-05
YDR191W	HST4	0.751688	NA	NA	NA	NA	-0.231938	NA	0.289669	NA	NA	NA	NA	0.701865	NA	0.751688	NA	NA	NA	NA	-0.231938	NA	0.289669	NA	NA	NA	NA	0.701865	NA
YDR192C	NUP42	0.501837	0.838797	0.987675	0.192215	-0.367915	#NAME?	-0.352106	0.684065	0.523242	0.365934	0.889777	0.76458	NA	0.815897	0.501837	0.838797	0.987675	0.192215	-0.367915	-5.05053	-0.352106	0.684065	0.523242	0.365934	0.889777	0.76458	0.0480074	0.815897
YDR194C	MSS116	-1.01136	-1.21232	-0.686046	-0.853095	-0.570942	0.201299	-1.2988	0.0408852	0.0203651	0.145728	0.0781537	0.249387	0.7253	0.00567623	-1.01136	-1.21232	-0.686046	-0.853095	-0.570942	0.201299	-1.2988	0.0408852	0.0203651	0.145728	0.0781537	0.249387	0.7253	0.00567623
YDR195W	REF2	0.317981	0.168774	0.281218	-0.0557752	0.474345	0.113405	-0.452839	0.708179	0.890703	0.691259	0.957419	0.543082	0.8975	0.612147	0.317981	0.168774	0.281218	-0.0557752	0.474345	0.113405	-0.452839	0.708179	0.890703	0.691259	0.957419	0.543082	0.8975	0.612147
YDR201W	SPC19	-0.917281	-0.707649	0.544221	-0.646829	-0.783581	-0.323823	-0.931054	0.378026	0.400332	0.444852	0.4266	0.274956	0.689149	0.302338	-0.917281	-0.707649	0.544221	-0.646829	-0.783581	-0.323823	-0.931054	0.378026	0.400332	0.444852	0.4266	0.274956	0.689149	0.302338
YDR204W	COQ4	0.654936	0.0613337	-0.119934	-0.494759	#NAME?	-1.40704	#NAME?	0.298666	0.944256	0.859557	0.467413	NA	0.0529985	NA	0.654936	0.0613337	-0.119934	-0.494759	-5.67677	-1.40704	-8.84919	0.298666	0.944256	0.859557	0.467413	0.0400509	0.0529985	0.0436938
YDR211W	GCD6	-0.700608	-1.19406	-1.61975	-1.47709	-0.767614	-0.396145	-2.14522	0.242911	0.052263	0.00669799	0.0156383	0.189126	0.537161	0.000540791	-0.700608	-1.19406	-1.61975	-1.47709	-0.767614	-0.396145	-2.14522	0.242911	0.052263	0.00669799	0.0156383	0.189126	0.537161	0.000540791
YDR212W	TCP1	0.0231266	-0.378075	-1.55507	-0.567	0.0647371	-0.95469	-1.66767	0.955044	0.19563	2.42763e-05	0.0462214	0.843031	0.00191774	8.58051e-06	0.0231266	-0.378075	-1.55507	-0.567	0.0647371	-0.95469	-1.66767	0.955044	0.19563	2.42763e-05	0.0462214	0.843031	0.00191774	8.58051e-06
YDR214W	AHA1	0.0514739	-0.369644	-1.3733	-0.998394	0.130676	-0.602487	-1.96011	0.927368	0.420585	0.00246721	0.0236183	0.788696	0.160108	9.61118e-05	0.0514739	-0.369644	-1.3733	-0.998394	0.130676	-0.602487	-1.96011	0.927368	0.420585	0.00246721	0.0236183	0.788696	0.160108	9.61118e-05
YDR216W	ADR1	#NAME?	0.646577	-0.22679	#NAME?	#NAME?	1.00802	-0.653818	NA	0.179772	0.701185	NA	NA	0.0310482	0.0858248	-10.6481	0.646577	-0.22679	-9.26592	-9.60566	1.00802	-0.653818	0.0275882	0.179772	0.701185	0.026812	0.0264147	0.0310482	0.0858248
YDR221W	GTB1	-0.930867	0.125278	-0.0536098	-0.569722	-0.390052	-0.775829	-1.09494	0.260475	0.912965	0.959009	0.499189	0.649449	0.354192	0.130238	-0.930867	0.125278	-0.0536098	-0.569722	-0.390052	-0.775829	-1.09494	0.260475	0.912965	0.959009	0.499189	0.649449	0.354192	0.130238
YDR226W	ADK1	-0.426926	0.0945392	-0.156395	-0.132977	0.220922	0.55513	0.0512387	0.183077	0.806649	0.637787	0.702461	0.501818	0.0760553	0.875917	-0.426926	0.0945392	-0.156395	-0.132977	0.220922	0.55513	0.0512387	0.183077	0.806649	0.637787	0.702461	0.501818	0.0760553	0.875917
YDR227W	SIR4	0.580351	NA	0.179076	NA	NA	0.759159	0.422041	0.327313	NA	0.764994	NA	NA	0.197401	0.438726	0.580351	NA	0.179076	NA	NA	0.759159	0.422041	0.327313	NA	0.764994	NA	NA	0.197401	0.438726
YDR229W	IVY1	0.454447	-0.84044	-0.0620094	0.293406	-0.53677	0.828848	0.0341199	0.54325	0.243476	0.933396	0.698196	0.552473	0.184907	0.960687	0.454447	-0.84044	-0.0620094	0.293406	-0.53677	0.828848	0.0341199	0.54325	0.243476	0.933396	0.698196	0.552473	0.184907	0.960687
YDR231C	COX20	-0.540695	#NAME?	#NAME?	-0.473412	#NAME?	0.597116	#NAME?	0.242911	NA	NA	0.24043	NA	0.296767	NA	-0.540695	-12.4704	-13.1162	-0.473412	-11.8317	0.597116	-15.0041	0.242911	0.0124102	0.0300438	0.24043	0.0358458	0.296767	0.0135131
YDR232W	HEM1	-0.159514	-0.452091	-0.451473	-0.60309	-0.326102	0.596739	-0.318046	0.720656	0.256545	0.227232	0.113321	0.410353	0.119926	0.362793	-0.159514	-0.452091	-0.451473	-0.60309	-0.326102	0.596739	-0.318046	0.720656	0.256545	0.227232	0.113321	0.410353	0.119926	0.362793
YDR233C	RTN1	-0.2452	-0.207636	-0.755267	-0.369897	0.492493	-0.36362	-0.59048	0.290623	0.386925	0.00179147	0.0993614	0.0295499	0.106903	0.00642698	-0.2452	-0.207636	-0.755267	-0.369897	0.492493	-0.36362	-0.59048	0.290623	0.386925	0.00179147	0.0993614	0.0295499	0.106903	0.00642698
YDR234W	LYS4	0.310933	0.189714	-0.599731	0.43643	0.295584	1.0443	0.285896	0.330829	0.57925	0.0459621	0.152313	0.350893	0.0019106	0.305591	0.310933	0.189714	-0.599731	0.43643	0.295584	1.0443	0.285896	0.330829	0.57925	0.0459621	0.152313	0.350893	0.0019106	0.305591
YDR235W	PRP42	0.473156	-0.210622	#NAME?	0.116854	-0.0571519	#NAME?	-0.746909	0.580096	0.823051	NA	0.923266	0.944466	NA	0.404711	0.473156	-0.210622	-9.60118	0.116854	-0.0571519	-7.61707	-0.746909	0.580096	0.823051	0.0335212	0.923266	0.944466	0.0485467	0.404711
YDR236C	FMN1	-0.0113453	-0.144021	-0.501339	-0.16749	-0.623801	0.182031	-0.607812	0.989156	0.850831	0.4011	0.832216	0.364489	0.806789	0.258521	-0.0113453	-0.144021	-0.501339	-0.16749	-0.623801	0.182031	-0.607812	0.989156	0.850831	0.4011	0.832216	0.364489	0.806789	0.258521
YDR237W	MRPL7	-0.570889	-0.815049	-0.0604298	-0.652654	-0.530077	0.443927	-0.0750047	0.592102	0.446645	0.95156	0.43781	0.602081	0.620077	0.9307	-0.570889	-0.815049	-0.0604298	-0.652654	-0.530077	0.443927	-0.0750047	0.592102	0.446645	0.95156	0.43781	0.602081	0.620077	0.9307
YDR238C	SEC26	0.103866	-0.109556	-0.656956	-0.440534	0.460286	0.281994	-0.708833	0.826156	0.821972	0.0792089	0.257231	0.24184	0.505821	0.0435105	0.103866	-0.109556	-0.656956	-0.440534	0.460286	0.281994	-0.708833	0.826156	0.821972	0.0792089	0.257231	0.24184	0.505821	0.0435105
YDR244W	PEX5	#NAME?	1.33251	0.450669	#NAME?	#NAME?	0.460843	#NAME?	NA	0.255643	0.651315	NA	NA	0.72896	NA	-9.79331	1.33251	0.450669	-8.41109	-8.75083	0.460843	-11.9233	0.0401504	0.255643	0.651315	0.0311085	0.030058	0.72896	0.0339463
YDR245W	MNN10	1.34927	-0.288388	-0.852077	2.06565	0.0671332	-0.508229	#NAME?	0.249767	0.833566	0.554896	0.0574957	0.953872	0.689149	NA	1.34927	-0.288388	-0.852077	2.06565	0.0671332	-0.508229	-11.6767	0.249767	0.833566	0.554896	0.0574957	0.953872	0.689149	0.0108421
YDR246W	TRS23	-0.790709	-0.749222	-0.982938	-1.19334	-0.857528	-0.222778	-0.386336	0.0701793	0.0915269	0.0237214	0.0198095	0.0469551	0.682304	0.48138	-0.790709	-0.749222	-0.982938	-1.19334	-0.857528	-0.222778	-0.386336	0.0701793	0.0915269	0.0237214	0.0198095	0.0469551	0.682304	0.48138
YDR248C	YDR248C	#NAME?	0.361114	#NAME?	#NAME?	-0.15226	-0.386775	-0.234376	NA	0.740089	NA	NA	0.921151	0.814073	0.826234	-11.3629	0.361114	-11.605	-9.9807	-0.15226	-0.386775	-0.234376	0.0314723	0.740089	0.0187694	0.0391204	0.921151	0.814073	0.826234
YDR251W	PAM1	-0.451609	-0.53586	0.170768	-0.791096	-0.92935	-0.640483	-0.48373	0.574549	0.45176	0.869937	0.242319	0.334332	0.408318	0.476504	-0.451609	-0.53586	0.170768	-0.791096	-0.92935	-0.640483	-0.48373	0.574549	0.45176	0.869937	0.242319	0.334332	0.408318	0.476504
YDR258C	HSP78	-0.710094	0.359964	1.4677	0.849764	0.388001	2.24726	0.892211	0.106729	0.439866	0.00160733	0.0499611	0.384637	3.9133e-05	0.0245811	-0.710094	0.359964	1.4677	0.849764	0.388001	2.24726	0.892211	0.106729	0.439866	0.00160733	0.0499611	0.384637	3.9133e-05	0.0245811
YDR261C	EXG2	-0.639487	0.268334	-0.868361	-0.585889	-0.188396	-0.44693	-0.904412	0.479316	0.796175	0.353569	0.506908	0.844381	0.682304	0.409213	-0.639487	0.268334	-0.868361	-0.585889	-0.188396	-0.44693	-0.904412	0.479316	0.796175	0.353569	0.506908	0.844381	0.682304	0.409213
YDR264C	AKR1	-0.290042	0.316758	NA	NA	0.294653	-0.432584	NA	0.716086	0.676108	NA	NA	0.669081	0.577416	NA	-0.290042	0.316758	NA	NA	0.294653	-0.432584	NA	0.716086	0.676108	NA	NA	0.669081	0.577416	NA
YDR266C	HEL2	-0.64984	-1.11862	-0.625238	-0.597829	-1.77567	-0.910221	-1.12664	0.0416741	0.00226241	0.0414785	0.0571131	7.9592e-05	0.00609339	0.000745906	-0.64984	-1.11862	-0.625238	-0.597829	-1.77567	-0.910221	-1.12664	0.0416741	0.00226241	0.0414785	0.0571131	7.9592e-05	0.00609339	0.000745906
YDR267C	CIA1	-0.510517	-1.0094	#NAME?	-1.25258	#NAME?	-0.660694	#NAME?	0.311018	0.172856	NA	0.0639142	NA	0.322968	NA	-0.510517	-1.0094	-8.79302	-1.25258	-7.50847	-0.660694	-10.6809	0.311018	0.172856	0.0484489	0.0639142	0.041272	0.322968	0.0167421
YDR268W	MSW1	#NAME?	0.822427	0.260088	0.439855	#NAME?	0.209078	-0.704071	NA	0.598823	0.856094	0.826141	NA	0.899357	0.66972	-7.82543	0.822427	0.260088	0.439855	-6.78296	0.209078	-0.704071	0.0409162	0.598823	0.856094	0.826141	0.038263	0.899357	0.66972
YDR272W	GLO2	-1.18552	-0.445091	0.575821	-0.304638	-0.739809	-0.496228	0.118835	0.00347205	0.252225	0.111845	0.429662	0.0464176	0.185823	0.751076	-1.18552	-0.445091	0.575821	-0.304638	-0.739809	-0.496228	0.118835	0.00347205	0.252225	0.111845	0.429662	0.0464176	0.185823	0.751076
YDR280W	RRP45	0.48876	-0.141849	-0.233533	-0.0218175	-0.0408635	-0.401899	-0.833745	0.505677	0.872832	0.751244	0.983076	0.955074	0.599043	0.170937	0.48876	-0.141849	-0.233533	-0.0218175	-0.0408635	-0.401899	-0.833745	0.505677	0.872832	0.751244	0.983076	0.955074	0.599043	0.170937
YDR289C	RTT103	-1.68621	-0.0635559	-0.2411	-0.637902	-0.537465	0.566869	-0.633615	0.249983	0.973171	0.867584	0.643559	0.729886	0.7003	0.600378	-1.68621	-0.0635559	-0.2411	-0.637902	-0.537465	0.566869	-0.633615	0.249983	0.973171	0.867584	0.643559	0.729886	0.7003	0.600378
YDR292C	SRP101	-0.303354	0.00611565	-0.300667	-0.98009	0.23645	0.187571	-0.574376	0.482229	0.988412	0.466671	0.0195689	0.577626	0.689149	0.112518	-0.303354	0.00611565	-0.300667	-0.98009	0.23645	0.187571	-0.574376	0.482229	0.988412	0.466671	0.0195689	0.577626	0.689149	0.112518
YDR293C	SSD1	-0.531105	0.0838687	0.0975506	-0.158388	-0.264232	0.501237	-0.464701	0.147586	0.853944	0.802878	0.689086	0.47973	0.162493	0.147362	-0.531105	0.0838687	0.0975506	-0.158388	-0.264232	0.501237	-0.464701	0.147586	0.853944	0.802878	0.689086	0.47973	0.162493	0.147362
YDR294C	DPL1	-1.20603	-0.383595	-0.351647	-0.849514	0.165658	0.148931	#NAME?	0.0771513	0.441759	0.454539	0.0739741	0.775625	0.7953	NA	-1.20603	-0.383595	-0.351647	-0.849514	0.165658	0.148931	-13.7148	0.0771513	0.441759	0.454539	0.0739741	0.775625	0.7953	0.032425
YDR296W	MHR1	-0.928046	-0.210594	-0.0771849	#NAME?	-0.316072	0.0988485	-0.42013	0.450749	0.915956	0.956389	NA	0.84437	0.94061	0.767346	-0.928046	-0.210594	-0.0771849	-10.17	-0.316072	0.0988485	-0.42013	0.450749	0.915956	0.956389	0.0392489	0.84437	0.94061	0.767346
YDR297W	SUR2	-0.0789773	-0.123093	-0.050598	-1.20532	1.00285	0.0703115	-0.667627	0.950974	0.920369	0.973341	0.345051	0.288624	0.958621	0.563121	-0.0789773	-0.123093	-0.050598	-1.20532	1.00285	0.0703115	-0.667627	0.950974	0.920369	0.973341	0.345051	0.288624	0.958621	0.563121
YDR298C	ATP5	-0.914481	-0.874178	0.192588	-0.114154	-1.30794	1.72342	0.567357	0.0431531	0.0612576	0.688186	0.830367	0.00539731	0.00067557	0.155035	-0.914481	-0.874178	0.192588	-0.114154	-1.30794	1.72342	0.567357	0.0431531	0.0612576	0.688186	0.830367	0.00539731	0.00067557	0.155035
YDR299W	BFR2	0.451345	-0.449189	-1.03016	-0.755361	-0.463283	-0.627533	-1.47641	0.320372	0.332661	0.0190101	0.08386	0.298944	0.153499	0.00113403	0.451345	-0.449189	-1.03016	-0.755361	-0.463283	-0.627533	-1.47641	0.320372	0.332661	0.0190101	0.08386	0.298944	0.153499	0.00113403
YDR300C	PRO1	-0.0365972	-0.116536	-1.39423	-0.390005	-0.0961626	1.05989	-0.0475191	0.960448	0.854164	0.00650283	0.451772	0.870026	0.0348991	0.931135	-0.0365972	-0.116536	-1.39423	-0.390005	-0.0961626	1.05989	-0.0475191	0.960448	0.854164	0.00650283	0.451772	0.870026	0.0348991	0.931135
YDR303C	RSC3	-0.193005	#NAME?	-0.614309	-0.625553	-0.232254	0.066643	-0.27583	0.837838	NA	0.550617	0.549779	0.788822	0.950798	0.780807	-0.193005	-11.5996	-0.614309	-0.625553	-0.232254	0.066643	-0.27583	0.837838	0.0327884	0.550617	0.549779	0.788822	0.950798	0.780807
YDR304C	CPR5	-0.771291	-0.0599832	0.155358	-0.478972	-0.716609	-0.245397	-0.34456	0.149642	0.936458	0.784551	0.374196	0.168614	0.687871	0.477505	-0.771291	-0.0599832	0.155358	-0.478972	-0.716609	-0.245397	-0.34456	0.149642	0.936458	0.784551	0.374196	0.168614	0.687871	0.477505
YDR308C	SRB7	0.00164497	-0.975934	#NAME?	-0.669275	#NAME?	-0.261313	-1.42019	0.999225	0.374132	NA	0.5215	NA	0.815384	0.220783	0.00164497	-0.975934	-9.53605	-0.669275	-8.2515	-0.261313	-1.42019	0.999225	0.374132	0.0361096	0.5215	0.0499268	0.815384	0.220783
YDR310C	SUM1	#NAME?	-1.00721	#NAME?	-0.635467	-0.189019	-0.887334	-0.782498	NA	0.586779	NA	0.612822	0.900283	0.641193	0.619446	-10.9399	-1.00721	-11.182	-0.635467	-0.189019	-0.887334	-0.782498	0.0181487	0.586779	0.0162072	0.612822	0.900283	0.641193	0.619446
YDR311W	TFB1	-0.0510618	#NAME?	#NAME?	-0.595736	0.248808	-0.234702	-0.492273	0.971306	NA	NA	0.600733	0.792951	0.82537	0.623398	-0.0510618	-7.36223	-8.00803	-0.595736	0.248808	-0.234702	-0.492273	0.971306	0.0258786	0.0388078	0.600733	0.792951	0.82537	0.623398
YDR320C	SWA2	-0.374138	0.222954	0.498557	0.434844	-0.00180121	0.329837	0.616743	0.693629	0.831861	0.566493	0.631081	0.997934	0.739727	0.420983	-0.374138	0.222954	0.498557	0.434844	-0.00180121	0.329837	0.616743	0.693629	0.831861	0.566493	0.631081	0.997934	0.739727	0.420983
YDR321W	ASP1	-0.639172	-0.878323	-1.08076	-0.830067	-0.749985	-0.985599	-1.45258	0.0272797	0.00544191	0.000636106	0.00659617	0.00991184	0.00148117	3.30614e-05	-0.639172	-0.878323	-1.08076	-0.830067	-0.749985	-0.985599	-1.45258	0.0272797	0.00544191	0.000636106	0.00659617	0.00991184	0.00148117	3.30614e-05
YDR322C-A	TIM11	-1.23643	-1.9521	0.0260263	-0.463997	-1.51472	1.33235	1.17988	0.0223624	0.00155824	0.970833	0.390505	0.00597929	0.0133266	0.0162999	-1.23643	-1.9521	0.0260263	-0.463997	-1.51472	1.33235	1.17988	0.0223624	0.00155824	0.970833	0.390505	0.00597929	0.0133266	0.0162999
YDR322W	MRPL35	-0.695584	-0.779556	0.19872	-0.951669	-0.634816	0.647663	-0.239443	0.30765	0.256545	0.782681	0.146411	0.348658	0.341492	0.8045	-0.695584	-0.779556	0.19872	-0.951669	-0.634816	0.647663	-0.239443	0.30765	0.256545	0.782681	0.146411	0.348658	0.341492	0.8045
YDR324C	UTP4	0.0363891	-0.647555	-2.30445	-1.4258	0.332516	-0.96257	-2.05952	0.968995	0.322399	0.000831887	0.0253555	0.610341	0.12222	0.00126015	0.0363891	-0.647555	-2.30445	-1.4258	0.332516	-0.96257	-2.05952	0.968995	0.322399	0.000831887	0.0253555	0.610341	0.12222	0.00126015
YDR328C	SKP1	-0.505236	-0.457319	0.521055	0.294637	-0.292236	0.224132	-0.76413	0.255436	0.314981	0.214601	0.514216	0.521342	0.653707	0.049778	-0.505236	-0.457319	0.521055	0.294637	-0.292236	0.224132	-0.76413	0.255436	0.314981	0.214601	0.514216	0.521342	0.653707	0.049778
YDR330W	UBX5	-0.283697	0.0899508	0.542836	0.337662	-0.46079	0.142026	0.0718339	0.762744	0.938124	0.514483	0.705453	0.707687	0.894288	0.93608	-0.283697	0.0899508	0.542836	0.337662	-0.46079	0.142026	0.0718339	0.762744	0.938124	0.514483	0.705453	0.707687	0.894288	0.93608
YDR335W	MSN5	2.71588	2.55205	1.70208	1.75008	1.56323	1.59892	1.58506	0.0677148	0.0903006	0.216753	0.365548	0.274659	0.416707	0.252012	2.71588	2.55205	1.70208	1.75008	1.56323	1.59892	1.58506	0.0677148	0.0903006	0.216753	0.365548	0.274659	0.416707	0.252012
YDR337W	MRPS28	-0.0765373	-1.14365	0.081973	-0.372478	-0.810629	1.3107	-0.070907	0.938749	0.142081	0.9184	0.598944	0.403194	0.0576046	0.930979	-0.0765373	-1.14365	0.081973	-0.372478	-0.810629	1.3107	-0.070907	0.938749	0.142081	0.9184	0.598944	0.403194	0.0576046	0.930979
YDR339C	FCF1	0.561648	#NAME?	0.598084	-0.369854	0.690413	0.709831	-0.122192	0.675605	NA	0.724882	0.809776	0.581376	0.632568	0.924648	0.561648	-7.86154	0.598084	-0.369854	0.690413	0.709831	-0.122192	0.675605	0.0426615	0.724882	0.809776	0.581376	0.632568	0.924648
YDR341C	YDR341C	-0.0437703	-0.370547	-1.28606	-0.0789811	0.265415	-0.67507	-0.999147	0.812197	0.024146	2.53028e-07	0.635033	0.0802947	0.000199958	3.55558e-06	-0.0437703	-0.370547	-1.28606	-0.0789811	0.265415	-0.67507	-0.999147	0.812197	0.024146	2.53028e-07	0.635033	0.0802947	0.000199958	3.55558e-06
YDR345C	HXT3	-0.109136	0.094222	-2.25439	-1.39361	0.224902	0.174095	-1.31537	0.888842	0.915956	0.000978999	0.0281347	0.745044	0.825482	0.0215826	-0.109136	0.094222	-2.25439	-1.39361	0.224902	0.174095	-1.31537	0.888842	0.915956	0.000978999	0.0281347	0.745044	0.825482	0.0215826
YDR346C	SVF1	0.210678	-0.522705	-1.24784	-0.842927	-0.188543	-0.423925	-1.28091	0.648215	0.222658	0.00380967	0.043325	0.666461	0.319934	0.00196216	0.210678	-0.522705	-1.24784	-0.842927	-0.188543	-0.423925	-1.28091	0.648215	0.222658	0.00380967	0.043325	0.666461	0.319934	0.00196216
YDR347W	MRP1	-2.00626	-1.27133	-0.619515	-1.48018	-1.91553	-0.305692	-1.56324	0.0270373	0.113754	0.428491	0.0595363	0.0300024	0.739531	0.0292242	-2.00626	-1.27133	-0.619515	-1.48018	-1.91553	-0.305692	-1.56324	0.0270373	0.113754	0.428491	0.0595363	0.0300024	0.739531	0.0292242
YDR348C	PAL1	-1.26703	-0.977426	-0.297342	-0.90972	-1.16175	-0.327983	-1.10933	0.0174333	0.0697269	0.580587	0.0760992	0.0252076	0.565559	0.0203014	-1.26703	-0.977426	-0.297342	-0.90972	-1.16175	-0.327983	-1.10933	0.0174333	0.0697269	0.580587	0.0760992	0.0252076	0.565559	0.0203014
YDR349C	YPS7	0.438629	1.04528	-0.382899	-0.544169	#NAME?	#NAME?	-0.0645577	0.654099	0.431986	0.672422	0.584431	NA	NA	0.937409	0.438629	1.04528	-0.382899	-0.544169	-8.01488	-7.31532	-0.0645577	0.654099	0.431986	0.672422	0.584431	0.0170061	0.0244239	0.937409
YDR353W	TRR1	-0.528716	-0.332973	0.0161895	-0.316188	-0.40431	-0.0324615	-0.324841	0.00318736	0.0541296	0.936073	0.054839	0.015839	0.878065	0.0302157	-0.528716	-0.332973	0.0161895	-0.316188	-0.40431	-0.0324615	-0.324841	0.00318736	0.0541296	0.936073	0.054839	0.015839	0.878065	0.0302157
YDR354W	TRP4	-0.625465	0.23179	-1.22991	1.73701	0.638886	-0.370242	0.357796	0.216257	0.689243	0.0130813	0.00197394	0.194546	0.484646	0.427953	-0.625465	0.23179	-1.22991	1.73701	0.638886	-0.370242	0.357796	0.216257	0.689243	0.0130813	0.00197394	0.194546	0.484646	0.427953
YDR356W	SPC110	-0.797145	-0.359072	-0.896302	-0.920435	-1.60102	-0.104478	-1.33844	0.258588	0.648513	0.179056	0.177281	0.0215607	0.909522	0.0326985	-0.797145	-0.359072	-0.896302	-0.920435	-1.60102	-0.104478	-1.33844	0.258588	0.648513	0.179056	0.177281	0.0215607	0.909522	0.0326985
YDR358W	GGA1	-0.94091	-0.529919	0.966921	-0.107332	-0.649879	0.13258	0.149286	0.230055	0.351122	0.0674537	0.87321	0.234805	0.843411	0.810257	-0.94091	-0.529919	0.966921	-0.107332	-0.649879	0.13258	0.149286	0.230055	0.351122	0.0674537	0.87321	0.234805	0.843411	0.810257
YDR361C	BCP1	0.863764	0.118478	-0.622185	0.212019	0.534741	0.0274423	-0.545725	0.164252	0.881694	0.294446	0.761619	0.393211	0.974601	0.321362	0.863764	0.118478	-0.622185	0.212019	0.534741	0.0274423	-0.545725	0.164252	0.881694	0.294446	0.761619	0.393211	0.974601	0.321362
YDR363W-A	SEM1	-0.600164	-0.521258	0.0534572	0.300181	-0.105637	-0.954784	-0.844997	0.624741	0.689237	0.971092	0.817587	0.932717	0.408318	0.405198	-0.600164	-0.521258	0.0534572	0.300181	-0.105637	-0.954784	-0.844997	0.624741	0.689237	0.971092	0.817587	0.932717	0.408318	0.405198
YDR365C	ESF1	-0.601837	-1.24986	-0.901378	-0.539312	-1.42175	0.433332	-0.930184	0.311018	0.0405103	0.105607	0.361657	0.0154685	0.484646	0.0717091	-0.601837	-1.24986	-0.901378	-0.539312	-1.42175	0.433332	-0.930184	0.311018	0.0405103	0.105607	0.361657	0.0154685	0.484646	0.0717091
YDR368W	YPR1	-0.608428	-0.220392	0.0622055	-0.279161	-0.875989	0.287598	0.00478257	0.0107211	0.358255	0.80107	0.216777	0.000768574	0.206758	0.985639	-0.608428	-0.220392	0.0622055	-0.279161	-0.875989	0.287598	0.00478257	0.0107211	0.358255	0.80107	0.216777	0.000768574	0.206758	0.985639
YDR372C	VPS74	-0.717389	-0.757017	-1.56075	-0.982056	-0.673029	-1.6358	-2.32624	0.471257	0.272106	0.0218644	0.136653	0.31646	0.0193983	0.0113459	-0.717389	-0.757017	-1.56075	-0.982056	-0.673029	-1.6358	-2.32624	0.471257	0.272106	0.0218644	0.136653	0.31646	0.0193983	0.0113459
YDR373W	FRQ1	#NAME?	-0.527495	-0.481335	-0.024969	#NAME?	#NAME?	#NAME?	NA	0.720132	0.663802	0.987575	NA	NA	NA	-8.4192	-0.527495	-0.481335	-0.024969	-7.37672	-6.67717	-10.5491	0.0319934	0.720132	0.663802	0.987575	0.0368001	0.0208467	0.0179142
YDR376W	ARH1	-1.08884	-1.8176	-0.92106	-1.19285	-0.616036	0.180103	-1.21217	0.313623	0.101399	0.315536	0.257231	0.570015	0.878442	0.309684	-1.08884	-1.8176	-0.92106	-1.19285	-0.616036	0.180103	-1.21217	0.313623	0.101399	0.315536	0.257231	0.570015	0.878442	0.309684
YDR377W	ATP17	-0.811184	-2.44918	0.394704	-0.0483941	-0.823421	1.98893	0.258316	0.196793	0.000894822	0.532896	0.95667	0.176737	0.00258893	0.664008	-0.811184	-2.44918	0.394704	-0.0483941	-0.823421	1.98893	0.258316	0.196793	0.000894822	0.532896	0.95667	0.176737	0.00258893	0.664008
YDR378C	LSM6	-0.259499	-0.253313	-0.323052	-0.275234	-0.986977	-0.250563	0.0237769	0.45605	0.469284	0.307444	0.408095	0.00415707	0.468617	0.948201	-0.259499	-0.253313	-0.323052	-0.275234	-0.986977	-0.250563	0.0237769	0.45605	0.469284	0.307444	0.408095	0.00415707	0.468617	0.948201
YDR379C-A	SDH6	#NAME?	#NAME?	0.955042	1.66084	#NAME?	1.40802	#NAME?	NA	NA	0.532263	0.29035	NA	0.331537	NA	-6.07626	-5.67253	0.955042	1.66084	-5.03379	1.40802	-8.20621	0.0296156	0.0472253	0.532263	0.29035	0.0407113	0.331537	0.0140318
YDR380W	ARO10	-0.052975	-0.206144	-0.463249	-0.321364	#NAME?	1.51306	-0.0504614	0.840268	0.485058	0.120267	0.26266	NA	0.00117616	0.820762	-0.052975	-0.206144	-0.463249	-0.321364	-6.65514	1.51306	-0.0504614	0.840268	0.485058	0.120267	0.26266	0.0412383	0.00117616	0.820762
YDR381W	YRA1	-0.628247	-0.129029	-0.468437	-0.391629	-0.512357	-0.451245	-0.340251	0.0353527	0.709993	0.0994439	0.178293	0.0775728	0.125392	0.196069	-0.628247	-0.129029	-0.468437	-0.391629	-0.512357	-0.451245	-0.340251	0.0353527	0.709993	0.0994439	0.178293	0.0775728	0.125392	0.196069
YDR382W	RPP2B	-0.0255486	-0.811383	-0.522332	-0.830606	-0.822258	-0.683397	-0.944672	0.941658	0.00474523	0.0358292	0.00338038	0.00277913	0.00943454	0.000490286	-0.0255486	-0.811383	-0.522332	-0.830606	-0.822258	-0.683397	-0.944672	0.941658	0.00474523	0.0358292	0.00338038	0.00277913	0.00943454	0.000490286
YDR383C	NKP1	-0.820352	-1.60746	-2.0401	-0.754505	-1.36375	-1.13892	-1.73876	0.322544	0.0486452	0.0304205	0.355241	0.0472818	0.176724	0.0129108	-0.820352	-1.60746	-2.0401	-0.754505	-1.36375	-1.13892	-1.73876	0.322544	0.0486452	0.0304205	0.355241	0.0472818	0.176724	0.0129108
YDR384C	ATO3	-0.230045	-1.2631	#NAME?	-0.56742	0.31375	0.680198	#NAME?	0.869401	0.465726	NA	0.71955	0.842872	0.683003	NA	-0.230045	-1.2631	-11.0378	-0.56742	0.31375	0.680198	-12.9256	0.869401	0.465726	0.0308835	0.71955	0.842872	0.683003	0.0488453
YDR388W	RVS167	-1.12961	-0.740932	-0.45645	-0.764356	-0.785592	-0.610034	-0.569947	0.00014546	0.00572969	0.0499157	0.00384667	0.00251978	0.013006	0.0116328	-1.12961	-0.740932	-0.45645	-0.764356	-0.785592	-0.610034	-0.569947	0.00014546	0.00572969	0.0499157	0.00384667	0.00251978	0.013006	0.0116328
YDR389W	SAC7	#NAME?	0.40652	#NAME?	#NAME?	0.214009	#NAME?	#NAME?	NA	0.573594	NA	NA	0.795638	NA	NA	-8.86856	0.40652	-9.11064	-7.48634	0.214009	-7.12653	-10.9985	0.0339966	0.573594	0.0179691	0.049715	0.795638	0.0176714	0.0331553
YDR390C	UBA2	-0.804504	-0.868772	-0.616148	-0.502626	-1.02774	-0.0655764	-0.729368	0.165094	0.134623	0.320648	0.386413	0.0683555	0.931226	0.19689	-0.804504	-0.868772	-0.616148	-0.502626	-1.02774	-0.0655764	-0.729368	0.165094	0.134623	0.320648	0.386413	0.0683555	0.931226	0.19689
YDR391C	YDR391C	#NAME?	#NAME?	1.26007	-0.0743142	-0.527406	0.458812	-0.274751	NA	NA	0.0767364	0.951308	0.559484	0.517133	0.684583	-9.5041	-9.10037	1.26007	-0.0743142	-0.527406	0.458812	-0.274751	0.0421138	0.02391	0.0767364	0.951308	0.559484	0.517133	0.684583
YDR392W	SPT3	-0.05858	0.555367	1.12675	0.0334966	-1.00845	#NAME?	#NAME?	0.954747	0.482841	0.257268	0.981707	0.236685	NA	NA	-0.05858	0.555367	1.12675	0.0334966	-1.00845	-8.61607	-12.488	0.954747	0.482841	0.257268	0.981707	0.236685	0.0201197	0.0399305
YDR394W	RPT3	-0.651044	-0.252765	-0.332174	-0.726729	-0.80313	-0.534555	-0.669771	0.0207949	0.385036	0.210115	0.0121005	0.00533897	0.0510282	0.00968811	-0.651044	-0.252765	-0.332174	-0.726729	-0.80313	-0.534555	-0.669771	0.0207949	0.385036	0.210115	0.0121005	0.00533897	0.0510282	0.00968811
YDR395W	SXM1	0.266923	0.134979	-0.515028	-0.801855	0.889655	0.791081	-0.659441	0.719994	0.870679	0.426039	0.390495	0.165293	0.223669	0.252626	0.266923	0.134979	-0.515028	-0.801855	0.889655	0.791081	-0.659441	0.719994	0.870679	0.426039	0.390495	0.165293	0.223669	0.252626
YDR397C	NCB2	-1.43624	-1.0915	-0.796138	-0.804482	-1.05551	-0.440469	-0.788869	0.0229398	0.0859674	0.179986	0.186305	0.0814305	0.509934	0.149867	-1.43624	-1.0915	-0.796138	-0.804482	-1.05551	-0.440469	-0.788869	0.0229398	0.0859674	0.179986	0.186305	0.0814305	0.509934	0.149867
YDR399W	HPT1	0.81628	-0.289132	-0.844332	-0.726865	0.262266	-0.722892	-0.243635	0.05991	0.541154	0.0431256	0.0882602	0.558785	0.0903489	0.545883	0.81628	-0.289132	-0.844332	-0.726865	0.262266	-0.722892	-0.243635	0.05991	0.541154	0.0431256	0.0882602	0.558785	0.0903489	0.545883
YDR404C	RPB7	-1.15932	0.403504	-1.34991	-1.1239	-0.660492	#NAME?	-0.960499	0.458172	0.805724	0.3632	0.334968	0.647835	NA	0.459863	-1.15932	0.403504	-1.34991	-1.1239	-0.660492	-8.54692	-0.960499	0.458172	0.805724	0.3632	0.334968	0.647835	0.0205395	0.459863
YDR405W	MRP20	#NAME?	#NAME?	-0.48354	-0.523596	#NAME?	-0.111501	-0.141849	NA	NA	0.545034	0.567229	NA	0.913879	0.874197	-11.3249	-10.9211	-0.48354	-0.523596	-10.2824	-0.111501	-0.141849	0.0181257	0.0187872	0.545034	0.567229	0.0259699	0.913879	0.874197
YDR408C	ADE8	-0.89214	-0.762319	-0.800867	-0.951914	-0.277398	-0.391892	-1.08271	0.278373	0.370541	0.306837	0.236157	0.758175	0.672999	0.130769	-0.89214	-0.762319	-0.800867	-0.951914	-0.277398	-0.391892	-1.08271	0.278373	0.370541	0.306837	0.236157	0.758175	0.672999	0.130769
YDR412W	RRP17	-0.867026	NA	-0.454574	-0.854524	NA	-1.51402	-1.47455	0.549662	NA	0.748885	0.516169	NA	0.289692	0.236397	-0.867026	NA	-0.454574	-0.854524	NA	-1.51402	-1.47455	0.549662	NA	0.748885	0.516169	NA	0.289692	0.236397
YDR416W	SYF1	-1.13322	-2.78241	-0.236509	NA	-1.45174	0.146367	NA	0.412958	0.0533019	0.870169	NA	0.257117	0.927975	NA	-1.13322	-2.78241	-0.236509	NA	-1.45174	0.146367	NA	0.412958	0.0533019	0.870169	NA	0.257117	0.927975	NA
YDR422C	SIP1	-0.573875	-0.580331	-0.612973	-0.0919724	-0.500733	-0.100234	0.0849925	0.549091	0.551393	0.348371	0.911861	0.587257	0.907837	0.902511	-0.573875	-0.580331	-0.612973	-0.0919724	-0.500733	-0.100234	0.0849925	0.549091	0.551393	0.348371	0.911861	0.587257	0.907837	0.902511
YDR424C	DYN2	-0.607126	0.118772	-0.197741	-0.301588	0.277741	-0.261637	0.237364	0.479316	0.870656	0.772496	0.617142	0.678255	0.723248	0.700336	-0.607126	0.118772	-0.197741	-0.301588	0.277741	-0.261637	0.237364	0.479316	0.870656	0.772496	0.617142	0.678255	0.723248	0.700336
YDR427W	RPN9	-0.385089	-0.872842	-1.41589	-0.477772	-0.6426	-1.14989	-1.72707	0.270443	0.0174473	0.000317598	0.156317	0.05698	0.00193706	3.91425e-05	-0.385089	-0.872842	-1.41589	-0.477772	-0.6426	-1.14989	-1.72707	0.270443	0.0174473	0.000317598	0.156317	0.05698	0.00193706	3.91425e-05
YDR428C	BNA7	Inf	NA	NA	NA	NA	NA	NA	NA	NA	NA	NA	NA	NA	NA	6.32471	NA	NA	NA	NA	NA	NA	0.040355	NA	NA	NA	NA	NA	NA
YDR429C	TIF35	-0.403866	-0.985469	-1.10068	-0.816113	-0.879106	-0.82388	-1.1397	0.303636	0.0164129	0.00513503	0.0347804	0.0221031	0.0315489	0.00253692	-0.403866	-0.985469	-1.10068	-0.816113	-0.879106	-0.82388	-1.1397	0.303636	0.0164129	0.00513503	0.0347804	0.0221031	0.0315489	0.00253692
YDR430C	CYM1	-1.06701	0.181941	-0.386981	-0.616357	-0.408259	1.33029	-1.60766	0.178919	0.85365	0.636584	0.443223	0.613638	0.0864528	0.0408226	-1.06701	0.181941	-0.386981	-0.616357	-0.408259	1.33029	-1.60766	0.178919	0.85365	0.636584	0.443223	0.613638	0.0864528	0.0408226
YDR432W	NPL3	-0.365422	-0.453719	-0.394816	-0.542558	-0.79237	-0.695747	-0.968152	0.180745	0.0973513	0.125113	0.043405	0.00495212	0.011255	0.000590351	-0.365422	-0.453719	-0.394816	-0.542558	-0.79237	-0.695747	-0.968152	0.180745	0.0973513	0.125113	0.043405	0.00495212	0.011255	0.000590351
YDR434W	GPI17	-0.0526508	-0.13718	-0.533439	-0.257413	-0.357633	-0.443671	#NAME?	0.956493	0.874836	0.572669	0.761084	0.613169	0.671996	NA	-0.0526508	-0.13718	-0.533439	-0.257413	-0.357633	-0.443671	-11.6323	0.956493	0.874836	0.572669	0.761084	0.613169	0.671996	0.0317663
YDR435C	PPM1	0.453138	0.291488	-0.0775985	-0.16248	0.480254	0.128906	#NAME?	0.482228	0.702884	0.919416	0.832216	0.485199	0.902554	NA	0.453138	0.291488	-0.0775985	-0.16248	0.480254	0.128906	-11.7124	0.482228	0.702884	0.919416	0.832216	0.485199	0.902554	0.0491835
YDR441C	APT2	Inf	Inf	NA	Inf	NA	NA	NA	NA	NA	NA	NA	NA	NA	NA	12.2935	7.08447	NA	8.88414	NA	NA	NA	0.0337999	0.0175807	NA	0.0321206	NA	NA	NA
YDR449C	UTP6	0.569965	-0.249383	0.0645955	-0.523157	0.418958	0.46319	-0.0333578	0.349408	0.716115	0.926667	0.522776	0.493784	0.457758	0.959877	0.569965	-0.249383	0.0645955	-0.523157	0.418958	0.46319	-0.0333578	0.349408	0.716115	0.926667	0.522776	0.493784	0.457758	0.959877
YDR452W	PPN1	-2.347	-0.823217	-0.50941	-0.752561	-1.6732	-1.35272	-1.59166	0.00325805	0.219219	0.435125	0.246402	0.0121153	0.0379993	0.00988732	-2.347	-0.823217	-0.50941	-0.752561	-1.6732	-1.35272	-1.59166	0.00325805	0.219219	0.435125	0.246402	0.0121153	0.0379993	0.00988732
YDR453C	TSA2	-0.113628	0.0449515	3.80412	0.466327	-0.863905	1.77408	-0.179194	0.88793	0.959129	2.42763e-05	0.48289	0.142909	0.0063398	0.758526	-0.113628	0.0449515	3.80412	0.466327	-0.863905	1.77408	-0.179194	0.88793	0.959129	2.42763e-05	0.48289	0.142909	0.0063398	0.758526
YDR454C	GUK1	-0.527373	-0.558011	-0.424511	-0.285615	-0.538633	-0.482226	-0.561341	0.00410067	0.00393025	0.0131137	0.0911799	0.00324832	0.00655705	0.00127487	-0.527373	-0.558011	-0.424511	-0.285615	-0.538633	-0.482226	-0.561341	0.00410067	0.00393025	0.0131137	0.0911799	0.00324832	0.00655705	0.00127487
YDR457W	TOM1	-0.452346	0.135203	-0.0240579	0.292079	0.306296	-0.0684261	#NAME?	0.518402	0.830743	0.974844	0.670605	0.542037	0.932802	NA	-0.452346	0.135203	-0.0240579	0.292079	0.306296	-0.0684261	-9.85531	0.518402	0.830743	0.974844	0.670605	0.542037	0.932802	0.0147421
YDR460W	TFB3	0.0801437	-0.170263	0.269701	-0.443837	0.122457	0.286022	0.352926	0.969483	0.939338	0.882319	0.800017	0.944455	0.891939	0.830138	0.0801437	-0.170263	0.269701	-0.443837	0.122457	0.286022	0.352926	0.969483	0.939338	0.882319	0.800017	0.944455	0.891939	0.830138
YDR462W	MRPL28	-0.078172	#NAME?	-0.157464	-1.04136	-0.328119	0.0543825	-0.503866	0.956493	NA	0.92582	0.493557	0.840655	0.971332	0.718821	-0.078172	-11.135	-0.157464	-1.04136	-0.328119	0.0543825	-0.503866	0.956493	0.0261073	0.92582	0.493557	0.840655	0.971332	0.718821
YDR465C	RMT2	0.323096	-0.446292	-0.55672	-1.11822	0.0961222	-0.467806	-0.618466	0.552538	0.402086	0.254218	0.0283162	0.870026	0.365179	0.165889	0.323096	-0.446292	-0.55672	-1.11822	0.0961222	-0.467806	-0.618466	0.552538	0.402086	0.254218	0.0283162	0.870026	0.365179	0.165889
YDR466W	PKH3	-0.193176	0.254741	-0.748976	-0.6491	0.250217	-0.578988	-2.33663	0.901693	0.874836	0.563134	0.630734	0.864555	0.689149	0.0386481	-0.193176	0.254741	-0.748976	-0.6491	0.250217	-0.578988	-2.33663	0.901693	0.874836	0.563134	0.630734	0.864555	0.689149	0.0386481
YDR469W	SDC1	-0.100303	0.304421	-0.601802	-0.0817149	-0.572336	-0.607882	-0.0474809	0.873287	0.58491	0.216143	0.898139	0.259502	0.229964	0.931135	-0.100303	0.304421	-0.601802	-0.0817149	-0.572336	-0.607882	-0.0474809	0.873287	0.58491	0.216143	0.898139	0.259502	0.229964	0.931135
YDR472W	TRS31	0.272205	0.0701688	-0.639353	#NAME?	-0.0582228	-0.347775	-0.0851986	0.658403	0.916994	0.367353	NA	0.936729	0.655415	0.903803	0.272205	0.0701688	-0.639353	-8.10802	-0.0582228	-0.347775	-0.0851986	0.658403	0.916994	0.367353	0.0379623	0.936729	0.655415	0.903803
YDR473C	PRP3	0.127734	-0.997621	#NAME?	1.83657	-1.08393	-2.21622	#NAME?	0.918929	0.469764	NA	0.213227	0.33628	0.161951	NA	0.127734	-0.997621	-11.0319	1.83657	-1.08393	-2.21622	-12.9197	0.918929	0.469764	0.033545	0.213227	0.33628	0.161951	0.0463694
YDR477W	SNF1	-0.0266195	0.111715	-0.256198	-0.304544	0.865046	0.367123	-0.104318	0.971306	0.867382	0.64154	0.580762	0.0908119	0.514992	0.845763	-0.0266195	0.111715	-0.256198	-0.304544	0.865046	0.367123	-0.104318	0.971306	0.867382	0.64154	0.580762	0.0908119	0.514992	0.845763
YDR481C	PHO8	-0.20702	-0.516239	-0.464845	-0.0557991	0.131287	0.758958	0.77665	0.761263	0.405632	0.427741	0.944416	0.84437	0.193007	0.134235	-0.20702	-0.516239	-0.464845	-0.0557991	0.131287	0.758958	0.77665	0.761263	0.405632	0.427741	0.944416	0.84437	0.193007	0.134235
YDR483W	KRE2	-0.498739	-0.133683	-1.73212	-0.859315	-0.13888	-0.326581	-1.47807	0.576995	0.905974	0.0306412	0.295173	0.882166	0.733901	0.044716	-0.498739	-0.133683	-1.73212	-0.859315	-0.13888	-0.326581	-1.47807	0.576995	0.905974	0.0306412	0.295173	0.882166	0.733901	0.044716
YDR486C	VPS60	-0.180398	-0.231895	0.424935	-0.487915	-1.54824	-0.557519	0.145247	0.870368	0.754709	0.510162	0.450746	0.0168168	0.391918	0.821308	-0.180398	-0.231895	0.424935	-0.487915	-1.54824	-0.557519	0.145247	0.870368	0.754709	0.510162	0.450746	0.0168168	0.391918	0.821308
YDR487C	RIB3	-0.396725	0.345283	-0.210946	0.703422	0.406914	0.503953	0.734946	0.324307	0.405853	0.606056	0.0693347	0.302698	0.19676	0.0373208	-0.396725	0.345283	-0.210946	0.703422	0.406914	0.503953	0.734946	0.324307	0.405853	0.606056	0.0693347	0.302698	0.19676	0.0373208
YDR490C	PKH1	0.127655	0.703987	0.185803	-0.440424	0.920182	0.364882	0.568542	0.923794	0.52583	0.870702	0.694359	0.377648	0.768042	0.552186	0.127655	0.703987	0.185803	-0.440424	0.920182	0.364882	0.568542	0.923794	0.52583	0.870702	0.694359	0.377648	0.768042	0.552186
YDR493W	MZM1	-1.01543	-0.954239	-0.857935	-0.986411	-0.945556	0.811735	-0.473387	0.219642	0.105612	0.120267	0.120267	0.0961897	0.155123	0.411495	-1.01543	-0.954239	-0.857935	-0.986411	-0.945556	0.811735	-0.473387	0.219642	0.105612	0.120267	0.120267	0.0961897	0.155123	0.411495
YDR494W	RSM28	0.0467638	-0.213149	-0.0816828	0.123442	0.284502	1.39471	0.501784	0.962613	0.796201	0.918782	0.8831	0.690075	0.037854	0.412573	0.0467638	-0.213149	-0.0816828	0.123442	0.284502	1.39471	0.501784	0.962613	0.796201	0.918782	0.8831	0.690075	0.037854	0.412573
YDR496C	PUF6	0.261463	-0.479813	-1.35134	-1.50285	0.243641	-0.842612	-1.59147	0.712395	0.469284	0.0257427	0.018354	0.715324	0.170606	0.00674719	0.261463	-0.479813	-1.35134	-1.50285	0.243641	-0.842612	-1.59147	0.712395	0.469284	0.0257427	0.018354	0.715324	0.170606	0.00674719
YDR500C	RPL37B	0.319936	-0.29242	-0.118746	-1.29769	1.08818	-0.847059	-0.625968	0.797198	0.821972	0.924056	0.207989	0.299887	0.43944	0.517284	0.319936	-0.29242	-0.118746	-1.29769	1.08818	-0.847059	-0.625968	0.797198	0.821972	0.924056	0.207989	0.299887	0.43944	0.517284
YDR502C	SAM2	-0.695799	-1.35721	-0.929957	-1.22664	-0.244936	-0.389352	-1.18647	0.000364629	1.08408e-06	1.62902e-05	1.35973e-06	0.129921	0.018892	1.19947e-06	-0.695799	-1.35721	-0.929957	-1.22664	-0.244936	-0.389352	-1.18647	0.000364629	1.08408e-06	1.62902e-05	1.35973e-06	0.129921	0.018892	1.19947e-06
YDR505C	PSP1	-0.472046	0.583922	0.797734	-0.466843	-0.919589	0.734611	0.101945	0.703952	0.587744	0.41251	0.659157	0.355837	0.480794	0.924413	-0.472046	0.583922	0.797734	-0.466843	-0.919589	0.734611	0.101945	0.703952	0.587744	0.41251	0.659157	0.355837	0.480794	0.924413
YDR507C	GIN4	-0.163987	-0.0738887	-0.467944	-0.379078	-0.128194	-0.761246	-0.560794	0.851003	0.933201	0.469684	0.616076	0.861653	0.296428	0.328958	-0.163987	-0.0738887	-0.467944	-0.379078	-0.128194	-0.761246	-0.560794	0.851003	0.933201	0.469684	0.616076	0.861653	0.296428	0.328958
YDR508C	GNP1	-0.330508	#NAME?	#NAME?	-1.34772	#NAME?	-1.50999	#NAME?	0.706124	NA	NA	0.115495	NA	0.0626617	NA	-0.330508	-12.0322	-12.678	-1.34772	-11.3935	-1.50999	-14.5659	0.706124	0.0336065	0.0480032	0.115495	0.0225149	0.0626617	0.0325553
YDR510W	SMT3	-0.783257	-0.140077	-0.215366	-0.417374	-0.806189	0.0657003	-0.369459	0.000806057	0.52583	0.27218	0.0400509	0.000560849	0.793472	0.042151	-0.783257	-0.140077	-0.215366	-0.417374	-0.806189	0.0657003	-0.369459	0.000806057	0.52583	0.27218	0.0400509	0.000560849	0.793472	0.042151
YDR512C	EMI1	#NAME?	#NAME?	0.639347	#NAME?	#NAME?	0.455374	#NAME?	NA	NA	0.653038	NA	NA	0.716269	NA	-6.99666	-6.59293	0.639347	-5.61444	-5.95419	0.455374	-9.12661	0.0340294	0.0381573	0.653038	0.0154131	0.0235955	0.716269	0.0410509
YDR513W	GRX2	-0.901635	0.104273	1.44051	0.336597	-0.534281	1.27037	0.688688	0.00806224	0.791029	0.000160904	0.298041	0.0921701	0.000552883	0.0203365	-0.901635	0.104273	1.44051	0.336597	-0.534281	1.27037	0.688688	0.00806224	0.791029	0.000160904	0.298041	0.0921701	0.000552883	0.0203365
YDR515W	SLF1	-0.402485	0.0958931	0.479349	1.11458	0.153604	0.87748	-0.265318	0.677809	0.938124	0.594518	0.189663	0.877312	0.319934	0.75814	-0.402485	0.0958931	0.479349	1.11458	0.153604	0.87748	-0.265318	0.677809	0.938124	0.594518	0.189663	0.877312	0.319934	0.75814
YDR516C	EMI2	-1.8064	-0.56795	-0.217495	-0.246949	-1.29474	0.741485	-0.538745	0.0121356	0.442237	0.772496	0.754571	0.057293	0.294287	0.392644	-1.8064	-0.56795	-0.217495	-0.246949	-1.29474	0.741485	-0.538745	0.0121356	0.442237	0.772496	0.754571	0.057293	0.294287	0.392644
YDR517W	GRH1	-1.14605	-1.55045	-0.942465	-1.12125	-1.37553	-0.662799	-1.74152	0.0380236	0.00931628	0.0734695	0.0417027	0.0134152	0.228567	0.00157869	-1.14605	-1.55045	-0.942465	-1.12125	-1.37553	-0.662799	-1.74152	0.0380236	0.00931628	0.0734695	0.0417027	0.0134152	0.228567	0.00157869
YDR518W	EUG1	-0.17236	-0.0071659	-0.0110278	-0.573843	-0.417823	-1.78278	-1.25599	0.629743	0.985234	0.979047	0.0725764	0.194367	2.12001e-05	0.000332426	-0.17236	-0.0071659	-0.0110278	-0.573843	-0.417823	-1.78278	-1.25599	0.629743	0.985234	0.979047	0.0725764	0.194367	2.12001e-05	0.000332426
YDR519W	FPR2	-1.13479	-0.198615	-0.314419	-0.934738	-1.20754	0.000183419	-0.269659	0.0176148	0.715465	0.513083	0.0448968	0.0109537	0.999772	0.534486	-1.13479	-0.198615	-0.314419	-0.934738	-1.20754	0.000183419	-0.269659	0.0176148	0.715465	0.513083	0.0448968	0.0109537	0.999772	0.534486
YDR527W	RBA50	1.14242	1.07944	0.783575	-0.0112354	0.177379	-0.21546	0.108602	0.0586363	0.111634	0.166665	0.990753	0.787979	0.786806	0.873354	1.14242	1.07944	0.783575	-0.0112354	0.177379	-0.21546	0.108602	0.0586363	0.111634	0.166665	0.990753	0.787979	0.786806	0.873354
YDR529C	QCR7	-1.50684	-2.31811	0.893958	0.000555248	-1.72529	2.53428	1.51865	0.000255448	9.50261e-06	0.00927363	0.99926	5.71699e-05	6.91118e-07	0.000109181	-1.50684	-2.31811	0.893958	0.000555248	-1.72529	2.53428	1.51865	0.000255448	9.50261e-06	0.00927363	0.99926	5.71699e-05	6.91118e-07	0.000109181
YDR530C	APA2	0.276357	0.496735	0.164475	0.106209	0.60911	0.534262	0.210098	0.63934	0.433396	0.834939	0.906215	0.271276	0.340118	0.769163	0.276357	0.496735	0.164475	0.106209	0.60911	0.534262	0.210098	0.63934	0.433396	0.834939	0.906215	0.271276	0.340118	0.769163
YDR531W	CAB1	#NAME?	-0.859982	#NAME?	-0.162438	-0.621623	-1.33987	-1.73404	NA	0.096262	NA	0.78734	0.142911	0.0495033	0.0134012	-12.2299	-0.859982	-12.4719	-0.162438	-0.621623	-1.33987	-1.73404	0.0136679	0.096262	0.0224399	0.78734	0.142911	0.0495033	0.0134012
YDR533C	HSP31	-1.32782	0.476117	2.33956	0.118006	0.50266	2.28429	1.22265	0.00143474	0.217209	6.09787e-06	0.784557	0.173908	6.71874e-06	0.00130639	-1.32782	0.476117	2.33956	0.118006	0.50266	2.28429	1.22265	0.00143474	0.217209	6.09787e-06	0.784557	0.173908	6.71874e-06	0.00130639
YDR539W	FDC1	0.750646	1.46336	0.485722	-0.222346	1.98207	1.86282	0.442963	0.335642	0.0439559	0.627225	0.774352	0.00673781	0.00993223	0.474696	0.750646	1.46336	0.485722	-0.222346	1.98207	1.86282	0.442963	0.335642	0.0439559	0.627225	0.774352	0.00673781	0.00993223	0.474696
YEL002C	WBP1	-0.564194	-0.221296	-1.31083	-0.992415	-0.578619	-0.374891	-1.36695	0.282535	0.713243	0.0110108	0.0519344	0.262444	0.49961	0.00543786	-0.564194	-0.221296	-1.31083	-0.992415	-0.578619	-0.374891	-1.36695	0.282535	0.713243	0.0110108	0.0519344	0.262444	0.49961	0.00543786
YEL003W	GIM4	-0.762421	-0.493837	-0.895005	-0.272522	-1.20768	-1.47877	-0.624948	0.29841	0.527835	0.195515	0.734797	0.0862455	0.0384246	0.334095	-0.762421	-0.493837	-0.895005	-0.272522	-1.20768	-1.47877	-0.624948	0.29841	0.527835	0.195515	0.734797	0.0862455	0.0384246	0.334095
YEL007W	MIT1	#NAME?	-0.954746	-0.683444	-0.541962	#NAME?	-0.684425	-0.313674	NA	0.124407	0.220144	0.450956	NA	0.239422	0.535159	-13.0933	-0.954746	-0.683444	-0.541962	-12.0508	-0.684425	-0.313674	0.0435103	0.124407	0.220144	0.450956	0.0396761	0.239422	0.535159
YEL011W	GLC3	-0.615824	-0.579952	3.38918	0.347043	-1.18314	0.608836	-0.616347	0.153476	0.322205	1.27672e-05	0.413209	0.0426022	0.149834	0.133448	-0.615824	-0.579952	3.38918	0.347043	-1.18314	0.608836	-0.616347	0.153476	0.322205	1.27672e-05	0.413209	0.0426022	0.149834	0.133448
YEL012W	UBC8	#NAME?	#NAME?	#NAME?	0.0995467	-0.199689	0.938834	#NAME?	NA	NA	NA	0.87321	0.648902	0.0687559	NA	-9.03478	-8.63105	-9.27686	0.0995467	-0.199689	0.938834	-11.1647	0.0353683	0.0427456	0.0222418	0.87321	0.648902	0.0687559	0.030006
YEL013W	VAC8	-0.233233	-0.0611521	-0.392775	0.0236418	-0.175286	0.523726	-0.688187	0.673188	0.927627	0.426039	0.974064	0.748738	0.297438	0.116509	-0.233233	-0.0611521	-0.392775	0.0236418	-0.175286	0.523726	-0.688187	0.673188	0.927627	0.426039	0.974064	0.748738	0.297438	0.116509
YEL015W	EDC3	-0.9112	-1.21879	-1.16553	-0.606534	-1.54013	-1.43968	-1.29633	0.193539	0.0857947	0.0768527	0.388016	0.0251761	0.035881	0.0365349	-0.9112	-1.21879	-1.16553	-0.606534	-1.54013	-1.43968	-1.29633	0.193539	0.0857947	0.0768527	0.388016	0.0251761	0.035881	0.0365349
YEL020W-A	TIM9	-0.856744	-0.951606	0.0812313	0.27948	-0.241936	1.59148	-0.293985	0.240506	0.19447	0.924056	0.726053	0.763341	0.026343	0.670053	-0.856744	-0.951606	0.0812313	0.27948	-0.241936	1.59148	-0.293985	0.240506	0.19447	0.924056	0.726053	0.763341	0.026343	0.670053
YEL021W	URA3	3.41814	7.61689	6.80187	0.592554	6.00049	4.48001	0.417948	7.63019e-10	0	0	0.0148964	5.54223e-13	2.3066e-11	0.0452284	3.41814	7.61689	6.80187	0.592554	6.00049	4.48001	0.417948	7.63019e-10	0	0	0.0148964	5.54223e-13	2.3066e-11	0.0452284
YEL022W	GEA2	0.855501	0.846145	-0.0841782	0.188512	0.688796	0.820688	0.0019114	0.0918206	0.0999953	0.883842	0.739857	0.166269	0.101221	0.997281	0.855501	0.846145	-0.0841782	0.188512	0.688796	0.820688	0.0019114	0.0918206	0.0999953	0.883842	0.739857	0.166269	0.101221	0.997281
YEL024W	RIP1	-0.80142	-1.15067	1.10794	0.986122	-0.79392	3.65995	1.7004	0.491527	0.256329	0.245022	0.318331	0.428848	0.000964931	0.0531529	-0.80142	-1.15067	1.10794	0.986122	-0.79392	3.65995	1.7004	0.491527	0.256329	0.245022	0.318331	0.428848	0.000964931	0.0531529
YEL026W	SNU13	-0.000571199	-0.134842	-0.796403	-0.725998	-0.293063	-0.528088	-0.805976	0.998426	0.58664	0.00109334	0.00340194	0.188971	0.0196972	0.000614254	-0.000571199	-0.134842	-0.796403	-0.725998	-0.293063	-0.528088	-0.805976	0.998426	0.58664	0.00109334	0.00340194	0.188971	0.0196972	0.000614254
YEL027W	VMA3	-0.446156	-0.593483	#NAME?	#NAME?	-0.110402	-0.273076	#NAME?	0.577044	0.456854	NA	NA	0.881494	0.809996	NA	-0.446156	-0.593483	-15.4452	-13.8209	-0.110402	-0.273076	-17.3331	0.577044	0.456854	0.0418872	0.0331687	0.881494	0.809996	0.0167471
YEL031W	SPF1	0.160587	0.459497	-1.26649	-0.613412	0.771517	-0.213452	-1.06439	0.677809	0.19299	0.000831887	0.0711799	0.0249647	0.575514	0.00190214	0.160587	0.459497	-1.26649	-0.613412	0.771517	-0.213452	-1.06439	0.677809	0.19299	0.000831887	0.0711799	0.0249647	0.575514	0.00190214
YEL032W	MCM3	-0.985927	-1.31919	-1.28351	-1.95616	-1.04038	-1.6278	-2.48275	0.0821753	0.0267918	0.0213738	0.00215561	0.0612424	0.00586002	0.000121487	-0.985927	-1.31919	-1.28351	-1.95616	-1.04038	-1.6278	-2.48275	0.0821753	0.0267918	0.0213738	0.00215561	0.0612424	0.00586002	0.000121487
YEL034W	HYP2	-0.59248	-0.893551	-1.06662	-1.17153	-1.086	-0.605083	-0.816848	0.0112899	0.000894822	9.6292e-05	8.36381e-05	8.70791e-05	0.00878561	0.000540791	-0.59248	-0.893551	-1.06662	-1.17153	-1.086	-0.605083	-0.816848	0.0112899	0.000894822	9.6292e-05	8.36381e-05	8.70791e-05	0.00878561	0.000540791
YEL036C	ANP1	-0.580488	-0.256001	-0.534507	-0.626278	-0.145929	0.0980332	-0.931246	0.365778	0.720132	0.441986	0.488332	0.851255	0.903256	0.23643	-0.580488	-0.256001	-0.534507	-0.626278	-0.145929	0.0980332	-0.931246	0.365778	0.720132	0.441986	0.488332	0.851255	0.903256	0.23643
YEL037C	RAD23	-1.04282	-1.1611	-0.965683	-1.04127	-1.37249	-0.850104	-1.22365	0.021549	0.0149383	0.0263888	0.0218496	0.00358522	0.0538603	0.0042189	-1.04282	-1.1611	-0.965683	-1.04127	-1.37249	-0.850104	-1.22365	0.021549	0.0149383	0.0263888	0.0218496	0.00358522	0.0538603	0.0042189
YEL038W	UTR4	-1.01111	-0.926951	-0.227073	-0.978966	-0.548192	-0.893832	-0.869049	0.173515	0.218613	0.774685	0.173933	0.468048	0.222271	0.180999	-1.01111	-0.926951	-0.227073	-0.978966	-0.548192	-0.893832	-0.869049	0.173515	0.218613	0.774685	0.173933	0.468048	0.222271	0.180999
YEL039C	CYC7	#NAME?	#NAME?	1.09366	1.429	0.807467	0.98164	#NAME?	NA	NA	0.0148815	0.00937115	0.0613244	0.0223451	NA	-5.42593	-5.0222	1.09366	1.429	0.807467	0.98164	-7.55587	0.0166451	0.012493	0.0148815	0.00937115	0.0613244	0.0223451	0.0250105
YEL040W	UTR2	0.590827	-0.440701	-1.21761	0.0485057	-1.25145	-0.16809	-0.962532	0.413584	0.560475	0.102573	0.960163	0.0678515	0.844677	0.161382	0.590827	-0.440701	-1.21761	0.0485057	-1.25145	-0.16809	-0.962532	0.413584	0.560475	0.102573	0.960163	0.0678515	0.844677	0.161382
YEL042W	GDA1	-0.249649	-1.16976	-1.17956	-1.73288	-0.281276	-0.983018	-1.47605	0.712395	0.0570169	0.0388438	0.00634051	0.650267	0.0918108	0.00809994	-0.249649	-1.16976	-1.17956	-1.73288	-0.281276	-0.983018	-1.47605	0.712395	0.0570169	0.0388438	0.00634051	0.650267	0.0918108	0.00809994
YEL043W	YEL043W	-1.26086	-0.593762	-0.13573	-0.163917	-0.552945	#NAME?	-0.943369	0.0677359	0.442288	0.855006	0.832216	0.415777	NA	0.148229	-1.26086	-0.593762	-0.13573	-0.163917	-0.552945	-6.7198	-0.943369	0.0677359	0.442288	0.855006	0.832216	0.415777	0.0476513	0.148229
YEL044W	IES6	-0.558485	#NAME?	-0.357859	-0.39032	#NAME?	0.636656	0.0228431	0.532319	NA	0.606056	0.657659	NA	0.37461	0.970957	-0.558485	-8.35283	-0.357859	-0.39032	-7.71408	0.636656	0.0228431	0.532319	0.0227348	0.606056	0.657659	0.0170316	0.37461	0.970957
YEL046C	GLY1	-0.0955576	-0.223379	-1.00196	0.227653	-0.351527	-0.791386	-0.247942	0.742405	0.397225	0.000385275	0.370075	0.150938	0.00279709	0.263436	-0.0955576	-0.223379	-1.00196	0.227653	-0.351527	-0.791386	-0.247942	0.742405	0.397225	0.000385275	0.370075	0.150938	0.00279709	0.263436
YEL047C	FRD1	-0.314793	-0.138657	0.247383	-0.384033	-0.228388	0.0120935	-0.688863	0.172649	0.57925	0.262233	0.087438	0.319849	0.968537	0.00221575	-0.314793	-0.138657	0.247383	-0.384033	-0.228388	0.0120935	-0.688863	0.172649	0.57925	0.262233	0.087438	0.319849	0.968537	0.00221575
YEL051W	VMA8	-0.584797	-0.787419	-0.118501	-0.253777	-0.572659	-0.284893	-0.839461	0.139539	0.0541296	0.780706	0.532184	0.139201	0.500857	0.0200464	-0.584797	-0.787419	-0.118501	-0.253777	-0.572659	-0.284893	-0.839461	0.139539	0.0541296	0.780706	0.532184	0.139201	0.500857	0.0200464
YEL052W	AFG1	1.4544	#NAME?	2.22935	1.34779	0.718879	2.06127	1.09045	0.362299	NA	0.110713	0.34824	0.654206	0.150717	0.437207	1.4544	-8.53134	2.22935	1.34779	0.718879	2.06127	1.09045	0.362299	0.0290243	0.110713	0.34824	0.654206	0.150717	0.437207
YEL053C	MAK10	#NAME?	#NAME?	#NAME?	-0.317911	0.47764	1.7367	0.487547	NA	NA	NA	0.722213	0.646994	0.0781719	0.602948	-8.26465	-7.86092	-8.50672	-0.317911	0.47764	1.7367	0.487547	0.0330885	0.0204103	0.0236949	0.722213	0.646994	0.0781719	0.602948
YEL055C	POL5	0.192917	0.248416	-1.36817	-0.531936	0.382979	-0.632138	-0.728847	0.86493	0.826454	0.166378	0.627324	0.693437	0.525556	0.380239	0.192917	0.248416	-1.36817	-0.531936	0.382979	-0.632138	-0.728847	0.86493	0.826454	0.166378	0.627324	0.693437	0.525556	0.380239
YEL056W	HAT2	-1.23917	-0.670819	-0.917119	-0.549435	-1.45408	0.637229	-0.460319	0.000474541	0.0185193	0.00146403	0.0397097	3.52286e-05	0.0183682	0.0519687	-1.23917	-0.670819	-0.917119	-0.549435	-1.45408	0.637229	-0.460319	0.000474541	0.0185193	0.00146403	0.0397097	3.52286e-05	0.0183682	0.0519687
YEL058W	PCM1	-0.175865	-0.199622	-1.37486	-0.632084	-0.719296	0.636148	-1.75314	0.742405	0.711109	0.00385084	0.161949	0.111367	0.163512	0.000382427	-0.175865	-0.199622	-1.37486	-0.632084	-0.719296	0.636148	-1.75314	0.742405	0.711109	0.00385084	0.161949	0.111367	0.163512	0.000382427
YEL060C	PRB1	-1.46358	1.14728	1.56789	0.0161104	0.377546	1.8582	1.19357	0.00439797	0.0243089	0.00203677	0.982288	0.442374	0.000632856	0.00857578	-1.46358	1.14728	1.56789	0.0161104	0.377546	1.8582	1.19357	0.00439797	0.0243089	0.00203677	0.982288	0.442374	0.000632856	0.00857578
YEL066W	HPA3	-0.983386	0.319752	0.517985	0.551942	0.740764	0.668489	-0.672887	0.106729	0.638777	0.386066	0.370444	0.220655	0.277345	0.209647	-0.983386	0.319752	0.517985	0.551942	0.740764	0.668489	-0.672887	0.106729	0.638777	0.386066	0.370444	0.220655	0.277345	0.209647
YEL071W	DLD3	1.1099	0.815359	-1.56478	-0.179583	1.7738	-3.28082	-0.727586	0.000109869	0.00210648	2.19217e-06	0.450126	8.75186e-07	3.16004e-10	0.00163829	1.1099	0.815359	-1.56478	-0.179583	1.7738	-3.28082	-0.727586	0.000109869	0.00210648	2.19217e-06	0.450126	8.75186e-07	3.16004e-10	0.00163829
YER002W	NOP16	-0.622556	-1.30402	-1.70632	-0.887625	0.177997	-0.93947	-1.13519	0.186891	0.00950392	0.000826549	0.0538778	0.724246	0.0417477	0.0093387	-0.622556	-1.30402	-1.70632	-0.887625	0.177997	-0.93947	-1.13519	0.186891	0.00950392	0.000826549	0.0538778	0.724246	0.0417477	0.0093387
YER003C	PMI40	-0.872113	-0.310946	-0.266233	-0.51896	-0.755533	-0.274458	-1.01681	0.00231086	0.250302	0.294446	0.0470978	0.00562837	0.304149	0.000330066	-0.872113	-0.310946	-0.266233	-0.51896	-0.755533	-0.274458	-1.01681	0.00231086	0.250302	0.294446	0.0470978	0.00562837	0.304149	0.000330066
YER004W	FMP52	-0.850795	0.278398	0.534872	-0.226647	-0.42005	0.122567	-0.182754	0.0240012	0.482841	0.129572	0.558205	0.258138	0.786806	0.601393	-0.850795	0.278398	0.534872	-0.226647	-0.42005	0.122567	-0.182754	0.0240012	0.482841	0.129572	0.558205	0.258138	0.786806	0.601393
YER006W	NUG1	-0.297015	-0.356458	-0.978304	-1.16347	-0.530494	-0.442279	-0.976368	0.397353	0.311034	0.00475812	0.00216078	0.108828	0.187277	0.00299801	-0.297015	-0.356458	-0.978304	-1.16347	-0.530494	-0.442279	-0.976368	0.397353	0.311034	0.00475812	0.00216078	0.108828	0.187277	0.00299801
YER007C-A	TMA20	-0.210902	-0.140753	-0.363711	-0.686839	-0.496755	-0.428778	-0.437762	0.475582	0.654894	0.172102	0.0169105	0.0686664	0.119926	0.0762782	-0.210902	-0.140753	-0.363711	-0.686839	-0.496755	-0.428778	-0.437762	0.475582	0.654894	0.172102	0.0169105	0.0686664	0.119926	0.0762782
YER008C	SEC3	-0.0562499	0.254013	0.836496	#NAME?	-0.117413	0.727093	0.383418	0.949998	0.73309	0.231193	NA	0.882247	0.319934	0.56107	-0.0562499	0.254013	0.836496	-6.74991	-0.117413	0.727093	0.383418	0.949998	0.73309	0.231193	0.0166028	0.882247	0.319934	0.56107
YER009W	NTF2	-0.154877	0.219727	-0.00444882	-0.390712	-0.653005	-0.326547	-0.108935	0.679935	0.55059	0.989454	0.241207	0.047415	0.340342	0.74334	-0.154877	0.219727	-0.00444882	-0.390712	-0.653005	-0.326547	-0.108935	0.679935	0.55059	0.989454	0.241207	0.047415	0.340342	0.74334
YER010C	YER010C	#NAME?	-0.495942	0.150233	-1.21982	-1.11322	-0.407859	-0.535943	NA	0.740089	0.912556	0.460845	0.5039	0.773101	0.726834	-9.66906	-0.495942	0.150233	-1.21982	-1.11322	-0.407859	-0.535943	0.038415	0.740089	0.912556	0.460845	0.5039	0.773101	0.726834
YER012W	PRE1	-0.00894543	0.0888235	-0.22746	-0.460026	-0.739373	-0.16958	-0.307656	0.984848	0.845733	0.534107	0.191629	0.036672	0.682166	0.339237	-0.00894543	0.0888235	-0.22746	-0.460026	-0.739373	-0.16958	-0.307656	0.984848	0.845733	0.534107	0.191629	0.036672	0.682166	0.339237
YER016W	BIM1	0.963842	-0.44326	-0.887626	0.211564	-0.941614	-1.4952	-0.43354	0.334749	0.69714	0.351906	0.858239	0.396918	0.168217	0.640174	0.963842	-0.44326	-0.887626	0.211564	-0.941614	-1.4952	-0.43354	0.334749	0.69714	0.351906	0.858239	0.396918	0.168217	0.640174
YER018C	SPC25	#NAME?	-0.941711	#NAME?	#NAME?	-0.878936	1.29091	#NAME?	NA	0.702884	NA	NA	0.615572	0.48723	NA	-10.5964	-0.941711	-10.8385	-9.21418	-0.878936	1.29091	-12.7263	0.0116702	0.702884	0.0299148	0.0160716	0.615572	0.48723	0.0204548
YER019C-A	SBH2	-0.760295	-0.71869	-1.41433	#NAME?	#NAME?	-0.624066	-1.26242	0.12528	0.116716	0.0269757	NA	NA	0.153396	0.0130365	-0.760295	-0.71869	-1.41433	-10.353	-10.6928	-0.624066	-1.26242	0.12528	0.116716	0.0269757	0.0101132	0.0320799	0.153396	0.0130365
YER019W	ISC1	0.225562	-0.0161015	0.261427	#NAME?	-2.31175	0.299789	#NAME?	0.854659	0.985719	0.768194	NA	0.0809447	0.762471	NA	0.225562	-0.0161015	0.261427	-6.01102	-2.31175	0.299789	-9.52319	0.854659	0.985719	0.768194	0.0129214	0.0809447	0.762471	0.0172293
YER021W	RPN3	-0.449802	-0.147965	-1.21914	-0.890107	0.594368	-0.885707	-1.86841	0.459348	0.836087	0.0287383	0.113201	0.299887	0.117427	0.00127585	-0.449802	-0.147965	-1.21914	-0.890107	0.594368	-0.885707	-1.86841	0.459348	0.836087	0.0287383	0.113201	0.299887	0.117427	0.00127585
YER023W	PRO3	-0.608811	-0.813561	-0.428668	-0.87389	-0.270743	-0.632061	-1.51559	0.18499	0.0809699	0.33211	0.0514778	0.564012	0.157708	0.00107134	-0.608811	-0.813561	-0.428668	-0.87389	-0.270743	-0.632061	-1.51559	0.18499	0.0809699	0.33211	0.0514778	0.564012	0.157708	0.00107134
YER025W	GCD11	0.0138886	-0.576467	-0.956818	-0.644277	-0.153365	-0.820591	-1.16474	0.969483	0.0343646	0.000770246	0.0159545	0.568143	0.00279453	9.93928e-05	0.0138886	-0.576467	-0.956818	-0.644277	-0.153365	-0.820591	-1.16474	0.969483	0.0343646	0.000770246	0.0159545	0.568143	0.00279453	9.93928e-05
YER026C	CHO1	-0.765712	-1.3209	-1.42	-1.18075	-0.9933	0.0359379	-2.1525	0.242911	0.0495946	0.024836	0.0640198	0.116054	0.966533	0.00110416	-0.765712	-1.3209	-1.42	-1.18075	-0.9933	0.0359379	-2.1525	0.242911	0.0495946	0.024836	0.0640198	0.116054	0.966533	0.00110416
YER027C	GAL83	-0.608338	-0.301801	-0.255465	-0.0181576	-1.09534	-0.0722296	-0.64691	0.530746	0.778763	0.703182	0.984922	0.0886209	0.931661	0.311548	-0.608338	-0.301801	-0.255465	-0.0181576	-1.09534	-0.0722296	-0.64691	0.530746	0.778763	0.703182	0.984922	0.0886209	0.931661	0.311548
YER029C	SMB1	-0.666589	-0.366675	-0.012929	-0.11269	-0.745549	-0.635091	-0.382445	0.250798	0.55059	0.984851	0.911015	0.358049	0.323398	0.507179	-0.666589	-0.366675	-0.012929	-0.11269	-0.745549	-0.635091	-0.382445	0.250798	0.55059	0.984851	0.911015	0.358049	0.323398	0.507179
YER030W	CHZ1	-0.564354	-0.789596	0.269105	-0.283863	-0.328721	0.288372	0.0570699	0.355401	0.371367	0.669039	0.65814	0.594474	0.671833	0.9307	-0.564354	-0.789596	0.269105	-0.283863	-0.328721	0.288372	0.0570699	0.355401	0.371367	0.669039	0.65814	0.594474	0.671833	0.9307
YER031C	YPT31	1.45019	-1.19353	-0.363225	0.579944	0.601559	0.294809	0.181293	0.351964	0.459305	0.825798	0.730895	0.710919	0.878065	0.939312	1.45019	-1.19353	-0.363225	0.579944	0.601559	0.294809	0.181293	0.351964	0.459305	0.825798	0.730895	0.710919	0.878065	0.939312
YER034W	YER034W	0.161548	0.281751	-0.0688945	#NAME?	#NAME?	0.79542	-0.304831	0.686905	0.470583	0.890066	NA	NA	0.0443961	0.356541	0.161548	0.281751	-0.0688945	-7.9911	-8.33085	0.79542	-0.304831	0.686905	0.470583	0.890066	0.019916	0.0437406	0.0443961	0.356541
YER036C	ARB1	-0.150617	-0.968426	-0.715384	-0.608132	-0.564118	-1.09027	-1.42651	0.560096	0.000758061	0.00367276	0.0140625	0.0182508	0.000115743	6.46201e-06	-0.150617	-0.968426	-0.715384	-0.608132	-0.564118	-1.09027	-1.42651	0.560096	0.000758061	0.00367276	0.0140625	0.0182508	0.000115743	6.46201e-06
YER040W	GLN3	-0.613511	-0.861622	-0.488155	-0.68515	-1.33049	-0.494199	-0.386691	0.25641	0.217542	0.456614	0.151582	0.062494	0.355325	0.408302	-0.613511	-0.861622	-0.488155	-0.68515	-1.33049	-0.494199	-0.386691	0.25641	0.217542	0.456614	0.151582	0.062494	0.355325	0.408302
YER042W	MXR1	0.289611	0.208748	0.15123	0.50882	1.92812	0.852099	0.536282	0.549495	0.69083	0.753083	0.253063	0.000273189	0.0553507	0.177366	0.289611	0.208748	0.15123	0.50882	1.92812	0.852099	0.536282	0.549495	0.69083	0.753083	0.253063	0.000273189	0.0553507	0.177366
YER043C	SAH1	-0.0932174	-0.401062	-1.04514	-0.886035	-0.218622	-0.44247	-1.36241	0.666152	0.0465337	2.55631e-05	0.000252446	0.259502	0.0223451	1.3626e-06	-0.0932174	-0.401062	-1.04514	-0.886035	-0.218622	-0.44247	-1.36241	0.666152	0.0465337	2.55631e-05	0.000252446	0.259502	0.0223451	1.3626e-06
YER044C	ERG28	1.0647	0.645262	#NAME?	-0.0184594	0.716276	#NAME?	-0.123694	0.0425728	0.320277	NA	0.978755	0.13402	NA	0.839326	1.0647	0.645262	-8.81246	-0.0184594	0.716276	-6.82835	-0.123694	0.0425728	0.320277	0.0190241	0.978755	0.13402	0.0381455	0.839326
YER048C	CAJ1	-0.311134	-0.385784	-0.175597	-0.545999	-0.42486	0.245641	-0.658932	0.427602	0.321332	0.657035	0.135114	0.257319	0.545703	0.0480201	-0.311134	-0.385784	-0.175597	-0.545999	-0.42486	0.245641	-0.658932	0.427602	0.321332	0.657035	0.135114	0.257319	0.545703	0.0480201
YER048W-A	ISD11	-0.941251	-0.512414	-0.523799	-0.59501	-0.892966	-0.0651366	-0.822301	0.00768643	0.13214	0.102573	0.071671	0.0092882	0.878442	0.00915328	-0.941251	-0.512414	-0.523799	-0.59501	-0.892966	-0.0651366	-0.822301	0.00768643	0.13214	0.102573	0.071671	0.0092882	0.878442	0.00915328
YER049W	TPA1	0.0163807	-0.421425	-0.935436	-0.833267	-0.227415	-0.534298	-1.02739	0.969483	0.156132	0.00230822	0.00751776	0.447193	0.0650008	0.000744247	0.0163807	-0.421425	-0.935436	-0.833267	-0.227415	-0.534298	-1.02739	0.969483	0.156132	0.00230822	0.00751776	0.447193	0.0650008	0.000744247
YER050C	RSM18	-0.234487	-1.12144	1.16262	-0.366465	-0.638208	2.14967	1.21302	0.77615	0.289169	0.0973823	0.744816	0.383135	0.00723154	0.0927777	-0.234487	-1.12144	1.16262	-0.366465	-0.638208	2.14967	1.21302	0.77615	0.289169	0.0973823	0.744816	0.383135	0.00723154	0.0927777
YER052C	HOM3	0.0508196	0.314408	-1.14456	1.85778	1.92308	0.00195456	0.492939	0.918397	0.431986	0.00329607	0.000138525	5.12596e-05	0.998638	0.137226	0.0508196	0.314408	-1.14456	1.85778	1.92308	0.00195456	0.492939	0.918397	0.431986	0.00329607	0.000138525	5.12596e-05	0.998638	0.137226
YER055C	HIS1	-0.139286	-0.576696	-1.25445	1.23067	0.675882	-0.983264	-0.168593	0.643054	0.0432944	0.000121889	0.000287952	0.0140035	0.00105295	0.502467	-0.139286	-0.576696	-1.25445	1.23067	0.675882	-0.983264	-0.168593	0.643054	0.0432944	0.000121889	0.000287952	0.0140035	0.00105295	0.502467
YER057C	HMF1	-0.541361	0.212424	0.440104	0.0999064	0.226472	0.885965	0.190488	0.0826831	0.531677	0.140093	0.779925	0.481922	0.00614935	0.508141	-0.541361	0.212424	0.440104	0.0999064	0.226472	0.885965	0.190488	0.0826831	0.531677	0.140093	0.779925	0.481922	0.00614935	0.508141
YER062C	GPP2	-2.64565	-0.117047	1.24077	-0.170947	-1.31979	1.64364	1.73087	3.93393e-08	0.713423	0.00013822	0.546447	8.70791e-05	7.42025e-06	4.12205e-06	-2.64565	-0.117047	1.24077	-0.170947	-1.31979	1.64364	1.73087	3.93393e-08	0.713423	0.00013822	0.546447	8.70791e-05	7.42025e-06	4.12205e-06
YER063W	THO1	-0.786004	-1.27097	0.0365843	0.0697808	-0.774582	0.0328188	-0.581084	0.111759	0.0156808	0.953649	0.911861	0.108541	0.959225	0.182415	-0.786004	-1.27097	0.0365843	0.0697808	-0.774582	0.0328188	-0.581084	0.111759	0.0156808	0.953649	0.911861	0.108541	0.959225	0.182415
YER067W	RGI1	-0.50167	0.212129	1.77089	0.88291	-0.169756	2.6143	1.36243	0.80148	0.924293	0.126461	0.467413	0.914113	0.0351788	0.19956	-0.50167	0.212129	1.77089	0.88291	-0.169756	2.6143	1.36243	0.80148	0.924293	0.126461	0.467413	0.914113	0.0351788	0.19956
YER068W	MOT2	-1.7319	-1.61358	-1.17634	-0.883415	-1.57081	-1.03143	-1.49804	0.0179555	0.0326384	0.0857537	0.211129	0.0274972	0.145795	0.0219804	-1.7319	-1.61358	-1.17634	-0.883415	-1.57081	-1.03143	-1.49804	0.0179555	0.0326384	0.0857537	0.211129	0.0274972	0.145795	0.0219804
YER069W	ARG5,6	-1.10194	-0.813551	-0.999963	2.19337	-0.875851	-0.648823	0.740042	0.00041196	0.00559161	0.000661106	3.35324e-07	0.00221671	0.0153599	0.0037908	-1.10194	-0.813551	-0.999963	2.19337	-0.875851	-0.648823	0.740042	0.00041196	0.00559161	0.000661106	3.35324e-07	0.00221671	0.0153599	0.0037908
YER070W	RNR1	-0.19997	-0.616722	-1.33372	-1.39468	-0.647079	-1.98164	-2.82001	0.647146	0.124291	0.00156421	0.00187295	0.0948468	5.12073e-05	1.20201e-06	-0.19997	-0.616722	-1.33372	-1.39468	-0.647079	-1.98164	-2.82001	0.647146	0.124291	0.00156421	0.00187295	0.0948468	5.12073e-05	1.20201e-06
YER071C	TDA2	Inf	NA	NA	NA	NA	NA	NA	NA	NA	NA	NA	NA	NA	NA	7.07998	NA	NA	NA	NA	NA	NA	0.013671	NA	NA	NA	NA	NA	NA
YER073W	ALD5	-0.784434	-1.08174	-0.585823	0.742927	-0.747534	0.0660682	1.19204	0.000309814	2.8671e-05	0.00221843	0.000606831	0.00042553	0.762675	2.99029e-06	-0.784434	-1.08174	-0.585823	0.742927	-0.747534	0.0660682	1.19204	0.000309814	2.8671e-05	0.00221843	0.000606831	0.00042553	0.762675	2.99029e-06
YER078C	ICP55	-0.559057	-1.68462	-0.335597	-0.32901	0.201976	-0.270136	-0.478419	0.594726	0.180295	0.743956	0.738825	0.853596	0.804322	0.601265	-0.559057	-1.68462	-0.335597	-0.32901	0.201976	-0.270136	-0.478419	0.594726	0.180295	0.743956	0.738825	0.853596	0.804322	0.601265
YER079W	YER079W	#NAME?	-0.574547	1.1074	0.237012	-1.67739	0.239043	0.440694	NA	0.435432	0.0769727	0.733913	0.0550681	0.746365	0.439409	-9.08273	-0.574547	1.1074	0.237012	-1.67739	0.239043	0.440694	0.0379151	0.435432	0.0769727	0.733913	0.0550681	0.746365	0.439409
YER080W	AIM9	-0.532616	-0.639697	-0.360746	-0.497529	-0.964145	0.0486095	-0.566381	0.100187	0.0566467	0.248056	0.115796	0.00443572	0.909114	0.0491757	-0.532616	-0.639697	-0.360746	-0.497529	-0.964145	0.0486095	-0.566381	0.100187	0.0566467	0.248056	0.115796	0.00443572	0.909114	0.0491757
YER081W	SER3	1.66188	2.6759	2.45355	6.9414	5.28709	2.32867	2.89759	0.000905146	9.62954e-06	6.75105e-06	1.16519e-10	1.629e-09	1.03201e-05	1.19947e-06	1.66188	2.6759	2.45355	6.9414	5.28709	2.32867	2.89759	0.000905146	9.62954e-06	6.75105e-06	1.16519e-10	1.629e-09	1.03201e-05	1.19947e-06
YER082C	UTP7	-0.612882	-0.668893	-1.00007	-0.972888	-0.278216	-0.518546	-1.50782	0.242714	0.205834	0.0441692	0.0564459	0.603807	0.322818	0.00276375	-0.612882	-0.668893	-1.00007	-0.972888	-0.278216	-0.518546	-1.50782	0.242714	0.205834	0.0441692	0.0564459	0.603807	0.322818	0.00276375
YER083C	GET2	-0.0848593	#NAME?	-0.240013	-1.22231	-1.0632	#NAME?	-1.05227	0.978925	NA	0.898957	0.516305	0.571383	NA	0.531186	-0.0848593	-9.00763	-0.240013	-1.22231	-1.0632	-7.66933	-1.05227	0.978925	0.0430429	0.898957	0.516305	0.571383	0.0214458	0.531186
YER086W	ILV1	-0.266909	-0.950503	-0.536312	0.307185	0.0108444	-0.288778	-0.180114	0.180764	0.000193464	0.00701921	0.112298	0.957626	0.138001	0.306682	-0.266909	-0.950503	-0.536312	0.307185	0.0108444	-0.288778	-0.180114	0.180764	0.000193464	0.00701921	0.112298	0.957626	0.138001	0.306682
YER087C-B	SBH1	-4.9217	0.605715	-0.557934	0.162451	0.89405	-0.158894	-0.748222	0.251787	0.916604	0.908366	0.985702	0.848971	0.984858	0.875917	-4.9217	0.605715	-0.557934	0.162451	0.89405	-0.158894	-0.748222	0.251787	0.916604	0.908366	0.985702	0.848971	0.984858	0.875917
YER088C	DOT6	-2.30595	-3.13007	-1.9026	-1.59936	-3.04579	-3.36427	-2.89958	0.00221361	0.000719531	0.00259587	0.00923074	0.00162111	0.000851577	0.000284795	-2.30595	-3.13007	-1.9026	-1.59936	-3.04579	-3.36427	-2.89958	0.00221361	0.000719531	0.00259587	0.00923074	0.00162111	0.000851577	0.000284795
YER089C	PTC2	-0.938508	-1.36211	-0.786463	-0.11456	-0.929125	-0.421998	-1.30453	0.0394262	0.00652629	0.0707612	0.830792	0.0380785	0.364231	0.00310739	-0.938508	-1.36211	-0.786463	-0.11456	-0.929125	-0.421998	-1.30453	0.0394262	0.00652629	0.0707612	0.830792	0.0380785	0.364231	0.00310739
YER090W	TRP2	-0.687241	-0.666319	-0.650668	0.865686	-0.292512	-0.218603	-0.155951	0.011673	0.0173876	0.0130435	0.00297566	0.265658	0.424572	0.521174	-0.687241	-0.666319	-0.650668	0.865686	-0.292512	-0.218603	-0.155951	0.011673	0.0173876	0.0130435	0.00297566	0.265658	0.424572	0.521174
YER091C	MET6	-0.410184	-0.725046	0.196211	-0.126979	0.534659	-2.39407	-0.593248	0.0268601	0.000894822	0.26526	0.499189	0.00502509	5.85547e-10	0.00130303	-0.410184	-0.725046	0.196211	-0.126979	0.534659	-2.39407	-0.593248	0.0268601	0.000894822	0.26526	0.499189	0.00502509	5.85547e-10	0.00130303
YER094C	PUP3	-0.318609	0.312715	0.0536988	0.0196883	-0.40133	0.422699	-0.24966	0.377684	0.397207	0.894762	0.968354	0.254185	0.225898	0.431476	-0.318609	0.312715	0.0536988	0.0196883	-0.40133	0.422699	-0.24966	0.377684	0.397207	0.894762	0.968354	0.254185	0.225898	0.431476
YER095W	RAD51	0.0309421	-0.413241	-0.00174697	0.424737	0.685174	-0.245449	-0.996482	0.979024	0.632902	0.998168	0.603129	0.547208	0.795874	0.148064	0.0309421	-0.413241	-0.00174697	0.424737	0.685174	-0.245449	-0.996482	0.979024	0.632902	0.998168	0.603129	0.547208	0.795874	0.148064
YER099C	PRS2	-1.35515	-0.827823	-0.785323	-1.0942	-0.937592	-0.108636	-1.41463	0.00855002	0.0953001	0.0914336	0.0271726	0.0505227	0.858775	0.00655871	-1.35515	-0.827823	-0.785323	-1.0942	-0.937592	-0.108636	-1.41463	0.00855002	0.0953001	0.0914336	0.0271726	0.0505227	0.858775	0.00655871
YER100W	UBC6	-0.660388	-0.952947	-0.664079	-1.09959	-1.05552	-0.907519	-1.52042	0.365778	0.342027	0.381693	0.257231	0.195273	0.352535	0.0993065	-0.660388	-0.952947	-0.664079	-1.09959	-1.05552	-0.907519	-1.52042	0.365778	0.342027	0.381693	0.257231	0.195273	0.352535	0.0993065
YER103W	SSA4	-0.561707	0.464265	3.3567	0.35928	-0.768296	3.52615	1.79848	0.169807	0.264986	2.53028e-07	0.383374	0.0529385	1.02972e-07	0.000108522	-0.561707	0.464265	3.3567	0.35928	-0.768296	3.52615	1.79848	0.169807	0.264986	2.53028e-07	0.383374	0.0529385	1.02972e-07	0.000108522
YER105C	NUP157	-0.262281	0.133022	-0.619228	-0.229824	0.641407	-0.27552	0.0682684	0.789156	0.907596	0.414645	0.793216	0.410818	0.762675	0.940563	-0.262281	0.133022	-0.619228	-0.229824	0.641407	-0.27552	0.0682684	0.789156	0.907596	0.414645	0.793216	0.410818	0.762675	0.940563
YER107C	GLE2	-1.26769	-1.63776	-0.74915	-0.919023	-1.35805	-1.59699	-1.54774	0.309454	0.187591	0.55021	0.463302	0.265888	0.18753	0.15127	-1.26769	-1.63776	-0.74915	-0.919023	-1.35805	-1.59699	-1.54774	0.309454	0.187591	0.55021	0.463302	0.265888	0.18753	0.15127
YER110C	KAP123	0.456855	0.0433949	-0.76049	-0.617384	0.318716	-0.218839	-0.99941	0.0432122	0.881859	0.00156203	0.00948521	0.149758	0.341492	0.000110263	0.456855	0.0433949	-0.76049	-0.617384	0.318716	-0.218839	-0.99941	0.0432122	0.881859	0.00156203	0.00948521	0.149758	0.341492	0.000110263
YER112W	LSM4	0.0133808	-0.155292	0.0231524	0.0377088	-0.215589	-0.336302	-0.162221	0.980952	0.772184	0.969053	0.952466	0.64565	0.476342	0.708934	0.0133808	-0.155292	0.0231524	0.0377088	-0.215589	-0.336302	-0.162221	0.980952	0.772184	0.969053	0.952466	0.64565	0.476342	0.708934
YER114C	BOI2	-0.698228	-0.76639	-0.583543	0.167491	-0.841937	-0.595136	-1.16008	0.132331	0.102056	0.184909	0.743566	0.191418	0.192463	0.00840758	-0.698228	-0.76639	-0.583543	0.167491	-0.841937	-0.595136	-1.16008	0.132331	0.102056	0.184909	0.743566	0.191418	0.192463	0.00840758
YER120W	SCS2	-0.623499	-0.523667	-0.653896	-0.493083	-0.174989	-0.120734	-0.659358	0.0146327	0.0437769	0.00892151	0.046467	0.49877	0.671833	0.00543786	-0.623499	-0.523667	-0.653896	-0.493083	-0.174989	-0.120734	-0.659358	0.0146327	0.0437769	0.00892151	0.046467	0.49877	0.671833	0.00543786
YER122C	GLO3	-1.0168	-0.963589	-0.53768	-0.644228	-1.15701	-0.337897	-0.935232	0.00259876	0.00526972	0.0710035	0.0388396	0.000922172	0.28506	0.00227395	-1.0168	-0.963589	-0.53768	-0.644228	-1.15701	-0.337897	-0.935232	0.00259876	0.00526972	0.0710035	0.0388396	0.000922172	0.28506	0.00227395
YER123W	YCK3	-0.975747	-0.343587	0.158105	-0.610775	-0.522313	0.0135951	#NAME?	0.240334	0.672033	0.882319	0.536858	0.521979	0.989269	NA	-0.975747	-0.343587	0.158105	-0.610775	-0.522313	0.0135951	-11.4912	0.240334	0.672033	0.882319	0.536858	0.521979	0.989269	0.0253695
YER125W	RSP5	-1.39676	-0.817398	-0.670574	-0.64031	-0.786164	-0.599184	-1.22655	0.000202949	0.0138961	0.0266893	0.0391089	0.0121726	0.0512867	0.000284509	-1.39676	-0.817398	-0.670574	-0.64031	-0.786164	-0.599184	-1.22655	0.000202949	0.0138961	0.0266893	0.0391089	0.0121726	0.0512867	0.000284509
YER126C	NSA2	0.347577	-0.170143	-0.896461	-0.300263	0.268599	-0.7664	-0.74817	0.290211	0.639536	0.00623926	0.359784	0.415975	0.0187342	0.0127957	0.347577	-0.170143	-0.896461	-0.300263	0.268599	-0.7664	-0.74817	0.290211	0.639536	0.00623926	0.359784	0.415975	0.0187342	0.0127957
YER127W	LCP5	-0.892969	-1.26816	-1.3418	-1.07737	-0.434988	-0.738437	-1.69092	0.129274	0.0400348	0.020549	0.094328	0.468488	0.203624	0.00318015	-0.892969	-1.26816	-1.3418	-1.07737	-0.434988	-0.738437	-1.69092	0.129274	0.0400348	0.020549	0.094328	0.468488	0.203624	0.00318015
YER132C	PMD1	-0.62288	-1.56225	-0.394169	-0.992985	-1.80907	-0.819017	-1.08789	0.592102	0.167995	0.701952	0.318331	0.176031	0.569509	0.218002	-0.62288	-1.56225	-0.394169	-0.992985	-1.80907	-0.819017	-1.08789	0.592102	0.167995	0.701952	0.318331	0.176031	0.569509	0.218002
YER133W	GLC7	-0.400461	-0.704282	-0.611625	-0.80565	-0.440601	-0.92772	-1.18163	0.272864	0.0596381	0.0752898	0.0271319	0.220243	0.0114005	0.00123661	-0.400461	-0.704282	-0.611625	-0.80565	-0.440601	-0.92772	-1.18163	0.272864	0.0596381	0.0752898	0.0271319	0.220243	0.0114005	0.00123661
YER134C	YER134C	-1.2843	-0.866072	-0.498293	-0.40296	-1.01355	-0.249277	-1.13108	0.19205	0.398115	0.623775	0.705665	0.297799	0.835942	0.187911	-1.2843	-0.866072	-0.498293	-0.40296	-1.01355	-0.249277	-1.13108	0.19205	0.398115	0.623775	0.705665	0.297799	0.835942	0.187911
YER136W	GDI1	-0.987651	-0.599494	-0.633703	-0.756946	-1.10696	-0.643617	-1.09535	0.00130801	0.0388058	0.0198	0.00923074	0.000513768	0.0199986	0.000272151	-0.987651	-0.599494	-0.633703	-0.756946	-1.10696	-0.643617	-1.09535	0.00130801	0.0388058	0.0198	0.00923074	0.000513768	0.0199986	0.000272151
YER139C	RTR1	-0.526241	0.275302	0.52505	-0.372034	-0.318347	-0.369251	-0.116871	0.310585	0.578982	0.231503	0.473502	0.498543	0.49692	0.800834	-0.526241	0.275302	0.52505	-0.372034	-0.318347	-0.369251	-0.116871	0.310585	0.578982	0.231503	0.473502	0.498543	0.49692	0.800834
YER143W	DDI1	-1.26919	0.563704	-0.0182328	-0.745002	-0.684905	0.385428	0.500572	0.131798	0.48159	0.984851	0.319881	0.366568	0.650475	0.461289	-1.26919	0.563704	-0.0182328	-0.745002	-0.684905	0.385428	0.500572	0.131798	0.48159	0.984851	0.319881	0.366568	0.650475	0.461289
YER145C	FTR1	Inf	NA	NA	NA	Inf	NA	NA	NA	NA	NA	NA	NA	NA	NA	10.1639	NA	NA	NA	13.9468	NA	NA	0.0369279	NA	NA	NA	0.0290077	NA	NA
YER146W	LSM5	-0.742906	-0.426684	-0.274144	0.358698	-0.481339	-0.0728993	-0.265605	0.351516	0.62048	0.739447	0.67015	0.549793	0.944156	0.726443	-0.742906	-0.426684	-0.274144	0.358698	-0.481339	-0.0728993	-0.265605	0.351516	0.62048	0.739447	0.67015	0.549793	0.944156	0.726443
YER148W	SPT15	0.618305	NA	NA	0.171644	0.764254	NA	NA	0.511573	NA	NA	0.863833	0.410818	NA	NA	0.618305	NA	NA	0.171644	0.764254	NA	NA	0.511573	NA	NA	0.863833	0.410818	NA	NA
YER149C	PEA2	-0.961378	-1.02092	-1.56934	-0.460776	-1.38389	-0.686957	-0.599153	0.423966	0.400006	0.19719	0.742684	0.23216	0.584065	0.612147	-0.961378	-1.02092	-1.56934	-0.460776	-1.38389	-0.686957	-0.599153	0.423966	0.400006	0.19719	0.742684	0.23216	0.584065	0.612147
YER151C	UBP3	-0.0137866	0.0238495	-0.339116	-0.322653	0.246509	0.782229	-0.120213	0.97993	0.964736	0.407868	0.447952	0.565872	0.0557211	0.772001	-0.0137866	0.0238495	-0.339116	-0.322653	0.246509	0.782229	-0.120213	0.97993	0.964736	0.407868	0.447952	0.565872	0.0557211	0.772001
YER152C	YER152C	-0.699418	-0.801964	-1.20034	#NAME?	0.0801324	0.964192	-0.723873	0.293203	0.244014	0.140972	NA	0.925686	0.132577	0.302222	-0.699418	-0.801964	-1.20034	-8.18155	0.0801324	0.964192	-0.723873	0.293203	0.244014	0.140972	0.0213274	0.925686	0.132577	0.302222
YER155C	BEM2	-0.129505	-0.451982	-0.4631	-0.410227	0.632164	-0.429677	#NAME?	0.769691	0.316213	0.369172	0.346907	0.116868	0.327836	NA	-0.129505	-0.451982	-0.4631	-0.410227	0.632164	-0.429677	-9.678	0.769691	0.316213	0.369172	0.346907	0.116868	0.327836	0.0197651
YER156C	YER156C	-0.580755	-0.631715	-1.30865	-0.782601	-0.884299	-0.71393	-1.64244	0.161007	0.128322	0.00230822	0.0538778	0.0295499	0.0784767	0.000260089	-0.580755	-0.631715	-1.30865	-0.782601	-0.884299	-0.71393	-1.64244	0.161007	0.128322	0.00230822	0.0538778	0.0295499	0.0784767	0.000260089
YER159C	BUR6	-0.905754	-0.441367	-0.614379	-1.18532	-1.04614	0.0364681	-0.218468	0.174444	0.482841	0.280269	0.0444053	0.0699548	0.961244	0.70187	-0.905754	-0.441367	-0.614379	-1.18532	-1.04614	0.0364681	-0.218468	0.174444	0.482841	0.280269	0.0444053	0.0699548	0.961244	0.70187
YER161C	SPT2	-1.13117	-0.130489	NA	NA	NA	NA	NA	0.18913	0.865252	NA	NA	NA	NA	NA	-1.13117	-0.130489	NA	NA	NA	NA	NA	0.18913	0.865252	NA	NA	NA	NA	NA
YER163C	GCG1	-0.731053	0.508752	0.796545	-0.606496	-0.755013	0.653976	0.215351	0.0941739	0.198738	0.0578498	0.112298	0.0496041	0.0890144	0.593873	-0.731053	0.508752	0.796545	-0.606496	-0.755013	0.653976	0.215351	0.0941739	0.198738	0.0578498	0.112298	0.0496041	0.0890144	0.593873
YER164W	CHD1	-1.27698	-1.03283	-1.61739	-1.407	-0.863633	-1.02174	-1.95455	0.012811	0.0455964	0.0047165	0.00777148	0.074047	0.0379993	0.000318676	-1.27698	-1.03283	-1.61739	-1.407	-0.863633	-1.02174	-1.95455	0.012811	0.0455964	0.0047165	0.00777148	0.074047	0.0379993	0.000318676
YER165W	PAB1	-0.461	-0.608721	-0.513176	-0.384567	-0.577529	-0.482549	-0.673605	0.0128313	0.00285427	0.00519693	0.0334814	0.0027047	0.00891777	0.000431505	-0.461	-0.608721	-0.513176	-0.384567	-0.577529	-0.482549	-0.673605	0.0128313	0.00285427	0.00519693	0.0334814	0.0027047	0.00891777	0.000431505
YER168C	CCA1	-0.569887	-0.513931	-1.36739	-0.747115	-0.790166	-0.463069	-1.38897	0.270443	0.334534	0.00780815	0.13486	0.113989	0.378765	0.00451912	-0.569887	-0.513931	-1.36739	-0.747115	-0.790166	-0.463069	-1.38897	0.270443	0.334534	0.00780815	0.13486	0.113989	0.378765	0.00451912
YER171W	RAD3	-1.67675	-0.952845	-0.208929	-0.955454	#NAME?	0.29494	-1.02772	0.00269953	0.0138961	0.551637	0.0117998	NA	0.364231	0.00616375	-1.67675	-0.952845	-0.208929	-0.955454	-11.5166	0.29494	-1.02772	0.00269953	0.0138961	0.551637	0.0117998	0.0130378	0.364231	0.00616375
YER172C	BRR2	-0.679126	-0.426802	0.189979	-0.075442	-0.423982	-0.322825	#NAME?	0.462807	0.56769	0.79077	0.922962	0.63366	0.747585	NA	-0.679126	-0.426802	0.189979	-0.075442	-0.423982	-0.322825	-14.2434	0.462807	0.56769	0.79077	0.922962	0.63366	0.747585	0.0141716
YER174C	GRX4	-0.898896	-1.56951	-0.886103	-1.41097	-2.46815	1.3005	-0.658777	0.0408852	0.00189473	0.0365767	0.00340346	2.0031e-05	0.00456682	0.0890639	-0.898896	-1.56951	-0.886103	-1.41097	-2.46815	1.3005	-0.658777	0.0408852	0.00189473	0.0365767	0.00340346	2.0031e-05	0.00456682	0.0890639
YER175C	TMT1	0.224414	1.58577	1.87151	3.93037	2.74575	0.075376	2.82438	0.869401	0.0699295	0.0256122	0.000513132	0.00351522	0.951701	0.00155725	0.224414	1.58577	1.87151	3.93037	2.74575	0.075376	2.82438	0.869401	0.0699295	0.0256122	0.000513132	0.00351522	0.951701	0.00155725
YER176W	ECM32	-0.548799	-0.0810688	0.302615	#NAME?	-0.00816611	0.550342	#NAME?	0.656984	0.95728	0.85704	NA	0.99458	0.668004	NA	-0.548799	-0.0810688	0.302615	-6.42354	-0.00816611	0.550342	-9.9357	0.656984	0.95728	0.85704	0.0494172	0.99458	0.668004	0.0494817
YER177W	BMH1	-0.951941	-0.58194	-0.0667878	-0.242234	-0.937061	-0.357911	-0.51642	9.23541e-06	0.00140177	0.687461	0.113818	1.09728e-05	0.0219868	0.00115586	-0.951941	-0.58194	-0.0667878	-0.242234	-0.937061	-0.357911	-0.51642	9.23541e-06	0.00140177	0.687461	0.113818	1.09728e-05	0.0219868	0.00115586
YER178W	PDA1	-0.572011	-0.530287	-0.207482	-0.364622	0.00397805	-0.103801	-0.803899	0.00783662	0.0156048	0.294446	0.070433	0.986228	0.657324	0.000298743	-0.572011	-0.530287	-0.207482	-0.364622	0.00397805	-0.103801	-0.803899	0.00783662	0.0156048	0.294446	0.070433	0.986228	0.657324	0.000298743
YER182W	FMP10	0.57347	0.0127579	0.858098	-0.684926	-0.101935	1.4697	0.453535	0.336064	0.985234	0.122781	0.235739	0.879352	0.012984	0.390164	0.57347	0.0127579	0.858098	-0.684926	-0.101935	1.4697	0.453535	0.336064	0.985234	0.122781	0.235739	0.879352	0.012984	0.390164
YER183C	FAU1	0.456971	0.864099	-0.254883	-0.0584779	0.711364	0.697516	0.284546	0.721421	0.476838	0.867584	0.970165	0.542966	0.572059	0.78099	0.456971	0.864099	-0.254883	-0.0584779	0.711364	0.697516	0.284546	0.721421	0.476838	0.867584	0.970165	0.542966	0.572059	0.78099
YFL002C	SPB4	-0.453051	-0.67978	-1.38125	#NAME?	0.28345	-0.691597	#NAME?	0.541273	0.453222	0.127483	NA	0.689747	0.300672	NA	-0.453051	-0.67978	-1.38125	-8.31663	0.28345	-0.691597	-11.8288	0.541273	0.453222	0.127483	0.025614	0.689747	0.300672	0.0294413
YFL004W	VTC2	-0.587497	-0.77774	-0.772357	-0.472381	-0.657214	0.821057	0.0685773	0.0767456	0.0263405	0.0188605	0.14627	0.0445966	0.0146445	0.840233	-0.587497	-0.77774	-0.772357	-0.472381	-0.657214	0.821057	0.0685773	0.0767456	0.0263405	0.0188605	0.14627	0.0445966	0.0146445	0.840233
YFL005W	SEC4	0.396853	-0.147779	-0.468019	0.118558	0.298893	-0.0810471	-0.942831	0.250719	0.709271	0.149821	0.758452	0.388575	0.847714	0.00393088	0.396853	-0.147779	-0.468019	0.118558	0.298893	-0.0810471	-0.942831	0.250719	0.709271	0.149821	0.758452	0.388575	0.847714	0.00393088
YFL007W	BLM10	-0.778427	-1.21573	-1.33537	-1.04858	-0.667288	-0.746274	-1.20775	0.534973	0.421488	0.198662	0.473502	0.544662	0.514028	0.204894	-0.778427	-1.21573	-1.33537	-1.04858	-0.667288	-0.746274	-1.20775	0.534973	0.421488	0.198662	0.473502	0.544662	0.514028	0.204894
YFL008W	SMC1	-1.12526	-0.404852	0.0562567	-0.654357	-0.945285	-0.798398	-0.715925	0.207909	0.55059	0.939884	0.290275	0.167802	0.19676	0.193707	-1.12526	-0.404852	0.0562567	-0.654357	-0.945285	-0.798398	-0.715925	0.207909	0.55059	0.939884	0.290275	0.167802	0.19676	0.193707
YFL010C	WWM1	-1.31178	-0.828167	-0.809456	-1.122	-0.579982	-0.978044	-1.59712	0.117873	0.342027	0.318019	0.170492	0.5039	0.243233	0.0332558	-1.31178	-0.828167	-0.809456	-1.122	-0.579982	-0.978044	-1.59712	0.117873	0.342027	0.318019	0.170492	0.5039	0.243233	0.0332558
YFL013C	IES1	0.322945	0.579528	0.274837	-0.448761	-0.0907905	0.405025	0.136435	0.60261	0.330847	0.648361	0.444181	0.900283	0.510069	0.815897	0.322945	0.579528	0.274837	-0.448761	-0.0907905	0.405025	0.136435	0.60261	0.330847	0.648361	0.444181	0.900283	0.510069	0.815897
YFL014W	HSP12	-4.19696	-2.61469	3.09566	0.609988	-2.15847	1.26414	1.35534	2.58162e-10	2.37611e-07	1.41843e-08	0.0308729	8.75186e-07	0.000135081	5.2797e-05	-4.19696	-2.61469	3.09566	0.609988	-2.15847	1.26414	1.35534	2.58162e-10	2.37611e-07	1.41843e-08	0.0308729	8.75186e-07	0.000135081	5.2797e-05
YFL016C	MDJ1	-0.992994	-0.161148	0.42735	-0.15138	-0.046442	0.93363	-0.348976	0.0655115	0.806149	0.42555	0.810653	0.937636	0.0792206	0.477777	-0.992994	-0.161148	0.42735	-0.15138	-0.046442	0.93363	-0.348976	0.0655115	0.806149	0.42555	0.810653	0.937636	0.0792206	0.477777
YFL017C	GNA1	-1.35966	-0.624363	0.0330782	-0.0872622	-0.556878	-0.13043	-0.983806	0.0717849	0.377956	0.970833	0.920982	0.417517	0.878442	0.0985787	-1.35966	-0.624363	0.0330782	-0.0872622	-0.556878	-0.13043	-0.983806	0.0717849	0.377956	0.970833	0.920982	0.417517	0.878442	0.0985787
YFL018C	LPD1	-0.888664	-0.615345	0.56469	-0.0647215	-0.869515	2.0763	0.173601	0.000411846	0.00833642	0.008454	0.793216	0.000444949	2.95857e-08	0.366185	-0.888664	-0.615345	0.56469	-0.0647215	-0.869515	2.0763	0.173601	0.000411846	0.00833642	0.008454	0.793216	0.000444949	2.95857e-08	0.366185
YFL022C	FRS2	-0.200753	-0.375542	-0.630181	-0.522455	-0.385339	-0.623757	-1.00416	0.111759	0.00671509	5.77446e-05	0.000545976	0.00373803	5.48195e-05	5.49957e-07	-0.200753	-0.375542	-0.630181	-0.522455	-0.385339	-0.623757	-1.00416	0.111759	0.00671509	5.77446e-05	0.000545976	0.00373803	5.48195e-05	5.49957e-07
YFL023W	BUD27	0.131803	0.40851	0.399298	-0.774315	-0.685491	0.352346	-0.241089	0.761263	0.295477	0.27218	0.0661092	0.194546	0.360584	0.48138	0.131803	0.40851	0.399298	-0.774315	-0.685491	0.352346	-0.241089	0.761263	0.295477	0.27218	0.0661092	0.194546	0.360584	0.48138
YFL026W	STE2	-0.333643	-1.17667	-0.696363	-0.846147	-0.22272	-0.494585	-1.01544	0.572532	0.0601546	0.199274	0.13392	0.661113	0.506938	0.1137	-0.333643	-1.17667	-0.696363	-0.846147	-0.22272	-0.494585	-1.01544	0.572532	0.0601546	0.199274	0.13392	0.661113	0.506938	0.1137
YFL028C	CAF16	0.327416	0.857083	-0.240365	1.00931	1.26448	0.441372	-0.372975	0.629704	0.173675	0.712224	0.0971387	0.0387329	0.50625	0.511279	0.327416	0.857083	-0.240365	1.00931	1.26448	0.441372	-0.372975	0.629704	0.173675	0.712224	0.0971387	0.0387329	0.50625	0.511279
YFL034C-A	RPL22B	-0.955519	-0.98721	-1.64158	-0.747142	-0.792911	-1.17803	-0.924732	0.0420677	0.0437769	0.00117884	0.10533	0.0835375	0.0131152	0.0287226	-0.955519	-0.98721	-1.64158	-0.747142	-0.792911	-1.17803	-0.924732	0.0420677	0.0437769	0.00117884	0.10533	0.0835375	0.0131152	0.0287226
YFL037W	TUB2	-0.700555	-0.086067	-0.41251	-0.325658	-0.566332	-0.467093	-0.698806	0.000745461	0.678227	0.0201221	0.0662799	0.00318575	0.011043	0.000323489	-0.700555	-0.086067	-0.41251	-0.325658	-0.566332	-0.467093	-0.698806	0.000745461	0.678227	0.0201221	0.0662799	0.00318575	0.011043	0.000323489
YFL038C	YPT1	-0.896507	-0.633972	-0.997091	-0.587372	-0.318106	-0.105866	-2.09433	0.00393942	0.0384047	0.00136073	0.042948	0.274659	0.761949	1.19947e-06	-0.896507	-0.633972	-0.997091	-0.587372	-0.318106	-0.105866	-2.09433	0.00393942	0.0384047	0.00136073	0.042948	0.274659	0.761949	1.19947e-06
YFL039C	ACT1	-0.288275	0.143092	-0.593786	-0.5708	0.211106	0.0621227	-0.831457	0.267782	0.616452	0.0191948	0.0279743	0.418966	0.844708	0.00134164	-0.288275	0.143092	-0.593786	-0.5708	0.211106	0.0621227	-0.831457	0.267782	0.616452	0.0191948	0.0279743	0.418966	0.844708	0.00134164
YFL041W	FET5	-0.592578	-0.238784	-0.194895	0.173284	-1.09908	-0.136168	-0.702785	0.479316	0.804213	0.82262	0.85743	0.155928	0.896695	0.321177	-0.592578	-0.238784	-0.194895	0.173284	-1.09908	-0.136168	-0.702785	0.479316	0.804213	0.82262	0.85743	0.155928	0.896695	0.321177
YFL044C	OTU1	-0.556492	-0.266979	-0.873221	-0.46935	-0.261767	0.637764	-0.594736	0.248119	0.726217	0.060979	0.493073	0.589185	0.177532	0.203822	-0.556492	-0.266979	-0.873221	-0.46935	-0.261767	0.637764	-0.594736	0.248119	0.726217	0.060979	0.493073	0.589185	0.177532	0.203822
YFL045C	SEC53	-0.553147	-0.257547	-0.156884	-0.566884	-0.572391	-1.0427	-0.898751	0.000888159	0.0838102	0.263405	0.000805396	0.000595237	1.00089e-06	4.75913e-06	-0.553147	-0.257547	-0.156884	-0.566884	-0.572391	-1.0427	-0.898751	0.000888159	0.0838102	0.263405	0.000805396	0.000595237	1.00089e-06	4.75913e-06
YFL046W	FMP32	-0.468672	0.647453	0.834338	-0.165176	0.180111	1.40802	0.438923	0.307362	0.210855	0.0557187	0.773898	0.707012	0.00375762	0.271331	-0.468672	0.647453	0.834338	-0.165176	0.180111	1.40802	0.438923	0.307362	0.210855	0.0557187	0.773898	0.707012	0.00375762	0.271331
YFL047W	RGD2	-0.187675	-0.245957	-0.145015	0.914931	0.848183	-0.508514	-0.0022079	0.836481	0.785091	0.864959	0.214939	0.258724	0.578046	0.997813	-0.187675	-0.245957	-0.145015	0.914931	0.848183	-0.508514	-0.0022079	0.836481	0.785091	0.864959	0.214939	0.258724	0.578046	0.997813
YFL048C	EMP47	-0.50399	0.0122011	-0.702616	-0.636872	0.37392	0.31841	-0.780047	0.468894	0.985933	0.267602	0.336455	0.583967	0.671833	0.178746	-0.50399	0.0122011	-0.702616	-0.636872	0.37392	0.31841	-0.780047	0.468894	0.985933	0.267602	0.336455	0.583967	0.671833	0.178746
YFR001W	LOC1	-0.746582	-1.57802	-1.2156	-0.64017	-0.881159	-2.27584	-2.29934	0.415672	0.0808302	0.147928	0.477928	0.318801	0.011051	0.00588292	-0.746582	-1.57802	-1.2156	-0.64017	-0.881159	-2.27584	-2.29934	0.415672	0.0808302	0.147928	0.477928	0.318801	0.011051	0.00588292
YFR002W	NIC96	0.698045	1.13571	NA	1.4709	1.1823	NA	0.541952	0.631933	0.457457	NA	0.317966	0.419958	NA	0.686605	0.698045	1.13571	NA	1.4709	1.1823	NA	0.541952	0.631933	0.457457	NA	0.317966	0.419958	NA	0.686605
YFR003C	YPI1	-1.63829	-1.20364	-0.619887	-1.38407	-1.53991	-1.28767	-0.985554	0.0060543	0.0427132	0.258156	0.0176875	0.00818211	0.0233051	0.0510216	-1.63829	-1.20364	-0.619887	-1.38407	-1.53991	-1.28767	-0.985554	0.0060543	0.0427132	0.258156	0.0176875	0.00818211	0.0233051	0.0510216
YFR004W	RPN11	-0.485019	-0.794737	-0.436859	-0.523839	-0.434512	-0.638954	-0.915615	0.226373	0.0529649	0.252682	0.175092	0.270879	0.101221	0.0125892	-0.485019	-0.794737	-0.436859	-0.523839	-0.434512	-0.638954	-0.915615	0.226373	0.0529649	0.252682	0.175092	0.270879	0.101221	0.0125892
YFR006W	YFR006W	-1.61079	-0.905978	-0.839213	-0.387708	-1.27342	-0.178378	-1.45182	9.00163e-05	0.0106555	0.0106576	0.234456	0.000698724	0.630768	0.000112604	-1.61079	-0.905978	-0.839213	-0.387708	-1.27342	-0.178378	-1.45182	9.00163e-05	0.0106555	0.0106576	0.234456	0.000698724	0.630768	0.000112604
YFR009W	GCN20	-0.212518	-0.702028	-0.872384	-0.858409	-0.58976	-0.528527	-1.1368	0.4568	0.014733	0.00203925	0.00355095	0.0270879	0.0472771	0.000162685	-0.212518	-0.702028	-0.872384	-0.858409	-0.58976	-0.528527	-1.1368	0.4568	0.014733	0.00203925	0.00355095	0.0270879	0.0472771	0.000162685
YFR010W	UBP6	-0.883947	0.0887981	-0.378567	-0.173102	-0.633153	0.119005	-0.794147	0.0208905	0.851929	0.29651	0.670605	0.0844953	0.79712	0.0207257	-0.883947	0.0887981	-0.378567	-0.173102	-0.633153	0.119005	-0.794147	0.0208905	0.851929	0.29651	0.670605	0.0844953	0.79712	0.0207257
YFR011C	MIC19	-1.4444	-0.308244	0.65955	-0.377672	-1.35167	0.963083	0.451359	0.00382193	0.54571	0.138937	0.428558	0.00539731	0.037853	0.276291	-1.4444	-0.308244	0.65955	-0.377672	-1.35167	0.963083	0.451359	0.00382193	0.54571	0.138937	0.428558	0.00539731	0.037853	0.276291
YFR014C	CMK1	#NAME?	0.053875	0.819702	0.794982	0.402448	1.74788	0.0968306	NA	0.964736	0.20555	0.403567	0.59712	0.0188548	0.88564	-9.95196	0.053875	0.819702	0.794982	0.402448	1.74788	0.0968306	0.0455162	0.964736	0.20555	0.403567	0.59712	0.0188548	0.88564
YFR016C	YFR016C	-1.21622	-0.987565	0.0250752	-0.43831	-1.98529	0.0723697	-1.03607	0.09442	0.132586	0.974844	0.511627	0.00407799	0.932451	0.0717091	-1.21622	-0.987565	0.0250752	-0.43831	-1.98529	0.0723697	-1.03607	0.09442	0.132586	0.974844	0.511627	0.00407799	0.932451	0.0717091
YFR021W	ATG18	-0.513406	-0.986721	-0.0571333	-0.106794	0.727503	-0.108812	-0.80603	0.66795	0.385036	0.968121	0.941249	0.551302	0.938751	0.40944	-0.513406	-0.986721	-0.0571333	-0.106794	0.727503	-0.108812	-0.80603	0.66795	0.385036	0.968121	0.941249	0.551302	0.938751	0.40944
YFR024C-A	LSB3	-1.02039	-0.622254	-0.698575	-0.375196	-0.0943942	-0.0301169	-1.20268	0.00859807	0.0982664	0.0498783	0.312437	0.823678	0.953076	0.00132041	-1.02039	-0.622254	-0.698575	-0.375196	-0.0943942	-0.0301169	-1.20268	0.00859807	0.0982664	0.0498783	0.312437	0.823678	0.953076	0.00132041
YFR025C	HIS2	-1.1073	-0.338761	0.162357	-0.330672	-0.584342	-0.356474	0.269404	0.109905	0.696376	0.825798	0.650389	0.39961	0.675328	0.678585	-1.1073	-0.338761	0.162357	-0.330672	-0.584342	-0.356474	0.269404	0.109905	0.696376	0.825798	0.650389	0.39961	0.675328	0.678585
YFR028C	CDC14	0.0809045	-0.990535	-1.49215	-1.41376	-0.265352	-1.17412	-1.66908	0.886234	0.0371191	0.00179447	0.00399356	0.571079	0.0107991	0.000471108	0.0809045	-0.990535	-1.49215	-1.41376	-0.265352	-1.17412	-1.66908	0.886234	0.0371191	0.00179447	0.00399356	0.571079	0.0107991	0.000471108
YFR030W	MET10	0.318748	0.345597	0.908182	1.9709	5.38027	0.161797	0.675376	0.477282	0.442237	0.0276899	0.000210577	1.629e-09	0.74651	0.0718569	0.318748	0.345597	0.908182	1.9709	5.38027	0.161797	0.675376	0.477282	0.442237	0.0276899	0.000210577	1.629e-09	0.74651	0.0718569
YFR032C-A	RPL29	0.428717	-0.202325	-0.164538	0.0506938	0.127072	-0.431432	-0.83358	0.562065	0.808004	0.825798	0.957419	0.871942	0.562441	0.166394	0.428717	-0.202325	-0.164538	0.0506938	0.127072	-0.431432	-0.83358	0.562065	0.808004	0.825798	0.957419	0.871942	0.562441	0.166394
YFR033C	QCR6	-1.03438	-1.42218	1.71999	0.132116	-0.642442	3.42231	2.01532	0.189038	0.0760835	0.0238353	0.894241	0.417517	0.000172927	0.0062558	-1.03438	-1.42218	1.71999	0.132116	-0.642442	3.42231	2.01532	0.189038	0.0760835	0.0238353	0.894241	0.417517	0.000172927	0.0062558
YFR034C	PHO4	-0.201557	-0.49839	#NAME?	0.252312	-0.341034	0.796695	0.114006	0.762744	0.583337	NA	0.78734	0.693437	0.200722	0.892445	-0.201557	-0.49839	-9.18059	0.252312	-0.341034	0.796695	0.114006	0.762744	0.583337	0.0248322	0.78734	0.693437	0.200722	0.892445
YFR037C	RSC8	-0.784484	-0.550702	-0.652348	-0.5209	-1.1027	-1.04065	-1.41107	0.0174089	0.0934942	0.0364151	0.100483	0.00174413	0.00250845	0.000121487	-0.784484	-0.550702	-0.652348	-0.5209	-1.1027	-1.04065	-1.41107	0.0174089	0.0934942	0.0364151	0.100483	0.00174413	0.00250845	0.000121487
YFR044C	DUG1	-0.610337	-0.0428406	0.06771	-0.31346	-0.101244	0.878019	-0.13195	0.0527738	0.92005	0.848132	0.320967	0.775345	0.00676894	0.662267	-0.610337	-0.0428406	0.06771	-0.31346	-0.101244	0.878019	-0.13195	0.0527738	0.92005	0.848132	0.320967	0.775345	0.00676894	0.662267
YFR047C	BNA6	-0.867242	0.515832	0.523179	-0.216296	-0.488331	1.15617	-0.554406	0.143775	0.406037	0.365364	0.743365	0.416691	0.0475311	0.291323	-0.867242	0.515832	0.523179	-0.216296	-0.488331	1.15617	-0.554406	0.143775	0.406037	0.365364	0.743365	0.416691	0.0475311	0.291323
YFR049W	YMR31	-1.58878	-1.88663	0.846972	0.359809	-1.16374	2.13793	0.670446	0.00352491	0.00142457	0.0802744	0.493712	0.0218811	0.000278831	0.134428	-1.58878	-1.88663	0.846972	0.359809	-1.16374	2.13793	0.670446	0.00352491	0.00142457	0.0802744	0.493712	0.0218811	0.000278831	0.134428
YFR050C	PRE4	0.0917183	-0.123129	-0.145561	-0.639609	-0.318024	-0.0264519	-0.558243	0.833862	0.776915	0.703182	0.0707923	0.386686	0.95841	0.0794414	0.0917183	-0.123129	-0.145561	-0.639609	-0.318024	-0.0264519	-0.558243	0.833862	0.776915	0.703182	0.0707923	0.386686	0.95841	0.0794414
YFR051C	RET2	-0.602291	-0.549725	-0.583548	-0.827605	-0.643132	-0.0492909	-0.93639	0.180764	0.227154	0.169482	0.05961	0.141315	0.932802	0.0211414	-0.602291	-0.549725	-0.583548	-0.827605	-0.643132	-0.0492909	-0.93639	0.180764	0.227154	0.169482	0.05961	0.141315	0.932802	0.0211414
YFR052W	RPN12	-0.142932	0.00731777	-0.130037	-0.447658	-0.369561	-0.690129	-0.573075	0.693861	0.985217	0.704111	0.157613	0.257117	0.032146	0.0475356	-0.142932	0.00731777	-0.130037	-0.447658	-0.369561	-0.690129	-0.573075	0.693861	0.985217	0.704111	0.157613	0.257117	0.032146	0.0475356
YFR053C	HXK1	-3.1977	-0.618797	1.81891	-0.140403	-1.46808	1.95904	0.972541	2.58162e-10	0.00717264	1.88342e-07	0.517085	2.02813e-06	4.4852e-08	7.73762e-05	-3.1977	-0.618797	1.81891	-0.140403	-1.46808	1.95904	0.972541	2.58162e-10	0.00717264	1.88342e-07	0.517085	2.02813e-06	4.4852e-08	7.73762e-05
YGL001C	ERG26	-0.652235	0.227337	-0.240854	-0.278235	-0.267639	1.01883	-0.321012	0.198934	0.698487	0.649242	0.600194	0.606497	0.0404254	0.483908	-0.652235	0.227337	-0.240854	-0.278235	-0.267639	1.01883	-0.321012	0.198934	0.698487	0.649242	0.600194	0.606497	0.0404254	0.483908
YGL004C	RPN14	-0.493944	-0.145907	-0.42241	-0.100261	0.565704	-0.1972	0.215736	0.566957	0.907747	0.672372	0.93461	0.571383	0.833913	0.819619	-0.493944	-0.145907	-0.42241	-0.100261	0.565704	-0.1972	0.215736	0.566957	0.907747	0.672372	0.93461	0.571383	0.833913	0.819619
YGL005C	COG7	-0.585374	-0.0770346	#NAME?	-0.601306	-0.435011	0.208354	-0.709064	0.336064	0.917762	NA	0.408095	0.461508	0.804438	0.190682	-0.585374	-0.0770346	-9.58642	-0.601306	-0.435011	0.208354	-0.709064	0.336064	0.917762	0.0390791	0.408095	0.461508	0.804438	0.190682
YGL006W	PMC1	1.88492	1.78891	0.586571	0.254707	1.34439	-0.1435	1.38659	0.257846	0.293534	0.738173	0.902007	0.42162	0.950473	0.348959	1.88492	1.78891	0.586571	0.254707	1.34439	-0.1435	1.38659	0.257846	0.293534	0.738173	0.902007	0.42162	0.950473	0.348959
YGL008C	PMA1	-0.391465	-0.812405	-1.69313	-0.826571	0.557387	0.165478	-1.07907	0.472995	0.119293	0.00183526	0.10172	0.27748	0.794873	0.0214054	-0.391465	-0.812405	-1.69313	-0.826571	0.557387	0.165478	-1.07907	0.472995	0.119293	0.00183526	0.10172	0.27748	0.794873	0.0214054
YGL009C	LEU1	-0.0247801	-0.327335	0.115593	0.26936	0.77129	-0.920006	1.10796	0.890862	0.032104	0.424343	0.0601137	3.52229e-05	3.90642e-06	7.74607e-07	-0.0247801	-0.327335	0.115593	0.26936	0.77129	-0.920006	1.10796	0.890862	0.032104	0.424343	0.0601137	3.52229e-05	3.90642e-06	7.74607e-07
YGL011C	SCL1	-0.338915	-0.0660794	-0.399011	-0.422683	-0.329786	-0.17506	-0.552613	0.137537	0.813639	0.0668015	0.0595363	0.139687	0.465191	0.00941826	-0.338915	-0.0660794	-0.399011	-0.422683	-0.329786	-0.17506	-0.552613	0.137537	0.813639	0.0668015	0.0595363	0.139687	0.465191	0.00941826
YGL012W	ERG4	0.549831	0.346477	-1.76013	-1.50847	0.30621	-0.0265363	-0.737825	0.405693	0.624194	0.0062648	0.0203748	0.646225	0.976089	0.189455	0.549831	0.346477	-1.76013	-1.50847	0.30621	-0.0265363	-0.737825	0.405693	0.624194	0.0062648	0.0203748	0.646225	0.976089	0.189455
YGL014W	PUF4	-0.832287	-0.432083	-0.619579	-0.315413	-0.575403	-0.701512	-1.28968	0.125801	0.450979	0.232824	0.577224	0.284309	0.189973	0.0201854	-0.832287	-0.432083	-0.619579	-0.315413	-0.575403	-0.701512	-1.28968	0.125801	0.450979	0.232824	0.577224	0.284309	0.189973	0.0201854
YGL016W	KAP122	Inf	NA	NA	NA	Inf	NA	NA	NA	NA	NA	NA	NA	NA	NA	7.17535	NA	NA	NA	7.26514	NA	NA	0.0402705	NA	NA	NA	0.0248788	NA	NA
YGL018C	JAC1	#NAME?	#NAME?	#NAME?	-0.633015	0.137214	-1.09172	#NAME?	NA	NA	NA	0.516305	0.864555	0.390279	NA	-10.1957	-9.79199	-10.4378	-0.633015	0.137214	-1.09172	-12.3257	0.0387885	0.0493786	0.0204117	0.516305	0.864555	0.390279	0.0173721
YGL019W	CKB1	-1.3275	-1.03064	-0.700435	-0.698284	-1.51201	-0.315314	-0.442277	0.0258033	0.0859674	0.212706	0.228072	0.0108718	0.633231	0.405628	-1.3275	-1.03064	-0.700435	-0.698284	-1.51201	-0.315314	-0.442277	0.0258033	0.0859674	0.212706	0.228072	0.0108718	0.633231	0.405628
YGL020C	GET1	0.462099	0.343648	#NAME?	0.0297615	0.574545	1.15382	-0.801505	0.270848	0.465726	NA	0.960419	0.299124	0.018892	0.113708	0.462099	0.343648	-8.81949	0.0297615	0.574545	1.15382	-0.801505	0.270848	0.465726	0.0389924	0.960419	0.299124	0.018892	0.113708
YGL022W	STT3	-0.494063	-1.26711	-1.79137	-1.90698	-0.243827	-0.867892	-1.91065	0.204449	0.00530685	0.00295961	0.000687497	0.537083	0.0277558	0.000255952	-0.494063	-1.26711	-1.79137	-1.90698	-0.243827	-0.867892	-1.91065	0.204449	0.00530685	0.00295961	0.000687497	0.537083	0.0277558	0.000255952
YGL023C	PIB2	0.469428	#NAME?	0.28278	#NAME?	-0.0430126	0.641462	0.0237174	0.67949	NA	0.739447	NA	0.957626	0.458623	0.978735	0.469428	-10.7428	0.28278	-9.76428	-0.0430126	0.641462	0.0237174	0.67949	0.0387367	0.739447	0.0323813	0.957626	0.458623	0.978735
YGL025C	PGD1	-0.701241	-0.240371	-0.500884	-0.529273	-1.11962	-0.336379	-0.433751	0.241717	0.722182	0.386066	0.4287	0.0849197	0.60371	0.467536	-0.701241	-0.240371	-0.500884	-0.529273	-1.11962	-0.336379	-0.433751	0.241717	0.722182	0.386066	0.4287	0.0849197	0.60371	0.467536
YGL026C	TRP5	-0.641907	-0.217576	-0.531257	0.749154	0.10103	0.00414908	-0.500973	0.00129972	0.236685	0.00390361	0.000520308	0.587257	0.98643	0.00370717	-0.641907	-0.217576	-0.531257	0.749154	0.10103	0.00414908	-0.500973	0.00129972	0.236685	0.00390361	0.000520308	0.587257	0.98643	0.00370717
YGL027C	CWH41	-2.05916	-1.39093	-1.21822	-1.22907	-1.76185	-0.513861	-1.83474	0.00347807	0.0242219	0.0315284	0.0356932	0.00430984	0.390319	0.00170714	-2.05916	-1.39093	-1.21822	-1.22907	-1.76185	-0.513861	-1.83474	0.00347807	0.0242219	0.0315284	0.0356932	0.00430984	0.390319	0.00170714
YGL030W	RPL30	-0.265975	-0.477905	0.171472	0.12266	-0.938598	-0.690091	-0.781598	0.293954	0.0642888	0.500209	0.648638	0.000851544	0.00721329	0.00167697	-0.265975	-0.477905	0.171472	0.12266	-0.938598	-0.690091	-0.781598	0.293954	0.0642888	0.500209	0.648638	0.000851544	0.00721329	0.00167697
YGL031C	RPL24A	-0.338266	-0.660053	-0.479952	-0.6174	-1.57026	-0.690539	-0.759957	0.264469	0.0364013	0.0933154	0.0394033	4.06472e-05	0.0214512	0.0072955	-0.338266	-0.660053	-0.479952	-0.6174	-1.57026	-0.690539	-0.759957	0.264469	0.0364013	0.0933154	0.0394033	4.06472e-05	0.0214512	0.0072955
YGL035C	MIG1	0.442885	-0.588808	1.17192	0.0606757	#NAME?	0.465783	0.178027	0.598732	0.481516	0.0861447	0.950701	NA	0.584065	0.801394	0.442885	-0.588808	1.17192	0.0606757	-9.08774	0.465783	0.178027	0.598732	0.481516	0.0861447	0.950701	0.0497873	0.584065	0.801394
YGL037C	PNC1	-2.8401	-1.09004	0.949015	-0.0610717	-1.36294	0.0677334	-0.23407	8.07878e-08	0.0021959	0.00329607	0.875005	0.0002404	0.861686	0.408302	-2.8401	-1.09004	0.949015	-0.0610717	-1.36294	0.0677334	-0.23407	8.07878e-08	0.0021959	0.00329607	0.875005	0.0002404	0.861686	0.408302
YGL038C	OCH1	-1.93857	-2.22921	-1.55055	-1.53792	-3.21021	-1.72437	-2.08123	0.012375	0.0070849	0.0319397	0.0389987	0.000865463	0.021281	0.00828003	-1.93857	-2.22921	-1.55055	-1.53792	-3.21021	-1.72437	-2.08123	0.012375	0.0070849	0.0319397	0.0389987	0.000865463	0.021281	0.00828003
YGL039W	YGL039W	0.347098	0.392082	-1.34961	-0.347411	0.236289	-0.370919	-0.891541	0.677809	0.64073	0.060044	0.668428	0.778595	0.665886	0.17736	0.347098	0.392082	-1.34961	-0.347411	0.236289	-0.370919	-0.891541	0.677809	0.64073	0.060044	0.668428	0.778595	0.665886	0.17736
YGL040C	HEM2	-0.79305	-0.298749	-0.207268	-0.77142	-0.0927337	0.465631	-1.48375	0.0197526	0.396926	0.545034	0.0231916	0.805308	0.157708	0.000108535	-0.79305	-0.298749	-0.207268	-0.77142	-0.0927337	0.465631	-1.48375	0.0197526	0.396926	0.545034	0.0231916	0.805308	0.157708	0.000108535
YGL041W-A	YGL041W-A	-1.88659	-1.18948	-2.13161	-0.927685	-1.71556	-1.27413	-0.712869	0.335642	0.46291	0.257268	0.631859	0.373114	0.379277	0.609592	-1.88659	-1.18948	-2.13161	-0.927685	-1.71556	-1.27413	-0.712869	0.335642	0.46291	0.257268	0.631859	0.373114	0.379277	0.609592
YGL043W	DST1	-0.455188	-0.633457	-0.701567	-0.445407	-0.543876	-0.704653	-0.721585	0.358428	0.200191	0.127483	0.363906	0.261026	0.139753	0.090871	-0.455188	-0.633457	-0.701567	-0.445407	-0.543876	-0.704653	-0.721585	0.358428	0.200191	0.127483	0.363906	0.261026	0.139753	0.090871
YGL044C	RNA15	#NAME?	0.23992	0.216185	-0.40621	-0.159863	0.111624	0.322643	NA	0.78721	0.784417	0.690672	0.832696	0.907987	0.723536	-10.7364	0.23992	0.216185	-0.40621	-0.159863	0.111624	0.322643	0.0328658	0.78721	0.784417	0.690672	0.832696	0.907987	0.723536
YGL048C	RPT6	-0.40563	-0.504503	-0.147737	-0.234929	-0.574728	-0.0259596	-0.805847	0.049436	0.0208539	0.481188	0.251572	0.006817	0.925367	0.000305953	-0.40563	-0.504503	-0.147737	-0.234929	-0.574728	-0.0259596	-0.805847	0.049436	0.0208539	0.481188	0.251572	0.006817	0.925367	0.000305953
YGL049C	TIF4632	-0.801965	-0.856188	-0.89837	-0.52163	-1.16593	-1.30478	-1.36276	0.182688	0.154776	0.114874	0.387577	0.0457835	0.027573	0.0133693	-0.801965	-0.856188	-0.89837	-0.52163	-1.16593	-1.30478	-1.36276	0.182688	0.154776	0.114874	0.387577	0.0457835	0.027573	0.0133693
YGL050W	TYW3	-0.703254	-1.01713	-0.723921	-1.25706	-1.59879	-1.1532	-1.40662	0.368756	0.252225	0.385739	0.246311	0.145316	0.183913	0.0756276	-0.703254	-1.01713	-0.723921	-1.25706	-1.59879	-1.1532	-1.40662	0.368756	0.252225	0.385739	0.246311	0.145316	0.183913	0.0756276
YGL054C	ERV14	-0.627225	-0.926902	#NAME?	-1.0675	-1.01812	-1.57935	#NAME?	0.323769	0.247384	NA	0.107729	0.0941415	0.0328564	NA	-0.627225	-0.926902	-11.5478	-1.0675	-1.01812	-1.57935	-13.4356	0.323769	0.247384	0.030454	0.107729	0.0941415	0.0328564	0.0301049
YGL055W	OLE1	-0.0241796	-0.277462	-0.318259	-0.191316	-0.46589	-0.689374	-0.34697	0.97899	0.702884	0.626604	0.792323	0.469681	0.277345	0.553386	-0.0241796	-0.277462	-0.318259	-0.191316	-0.46589	-0.689374	-0.34697	0.97899	0.702884	0.626604	0.792323	0.469681	0.277345	0.553386
YGL056C	SDS23	0.152256	0.415122	#NAME?	-0.405992	0.118147	0.508037	-0.798469	0.764328	0.37492	NA	0.480172	0.788696	0.205449	0.0337679	0.152256	0.415122	-11.4487	-0.405992	0.118147	0.508037	-0.798469	0.764328	0.37492	0.0446803	0.480172	0.788696	0.205449	0.0337679
YGL057C	GEP7	-0.135434	0.838951	1.17605	0.596398	0.446881	0.995284	0.447914	0.840268	0.182682	0.0354081	0.284309	0.563012	0.0782373	0.373437	-0.135434	0.838951	1.17605	0.596398	0.446881	0.995284	0.447914	0.840268	0.182682	0.0354081	0.284309	0.563012	0.0782373	0.373437
YGL058W	RAD6	-0.279527	#NAME?	-0.526773	-0.115077	#NAME?	-0.179004	#NAME?	0.792232	NA	0.668266	0.939539	NA	0.903461	NA	-0.279527	-13.5584	-0.526773	-0.115077	-12.9197	-0.179004	-16.0921	0.792232	0.0179986	0.668266	0.939539	0.0403062	0.903461	0.0491869
YGL061C	DUO1	0.187028	-1.21801	1.42343	1.42254	#NAME?	2.16731	1.30159	0.80166	0.0906758	0.0206399	0.0179759	NA	0.00247828	0.020153	0.187028	-1.21801	1.42343	1.42254	-9.74309	2.16731	1.30159	0.80166	0.0906758	0.0206399	0.0179759	0.0279383	0.00247828	0.020153
YGL062W	PYC1	0.395976	0.56506	0.346979	0.520797	1.96909	1.47921	-0.784126	0.585787	0.423727	0.618657	0.446959	0.00482712	0.0263191	0.18346	0.395976	0.56506	0.346979	0.520797	1.96909	1.47921	-0.784126	0.585787	0.423727	0.618657	0.446959	0.00482712	0.0263191	0.18346
YGL066W	SGF73	-0.233926	-0.100352	0.248996	-0.348443	-0.219705	0.706401	-0.103965	0.631809	0.853529	0.59243	0.385312	0.633989	0.143487	0.814541	-0.233926	-0.100352	0.248996	-0.348443	-0.219705	0.706401	-0.103965	0.631809	0.853529	0.59243	0.385312	0.633989	0.143487	0.814541
YGL067W	NPY1	0.0716012	0.00940811	-0.991789	-0.539533	-0.579934	-0.106361	#NAME?	0.936143	0.990282	0.294446	0.494591	0.459072	0.903806	NA	0.0716012	0.00940811	-0.991789	-0.539533	-0.579934	-0.106361	-13.7092	0.936143	0.990282	0.294446	0.494591	0.459072	0.903806	0.0301778
YGL068W	MNP1	-0.999861	-0.697554	-0.24592	-1.24936	-1.45224	0.325847	-0.444369	0.0987302	0.261643	0.701211	0.0388747	0.0168204	0.632471	0.416253	-0.999861	-0.697554	-0.24592	-1.24936	-1.45224	0.325847	-0.444369	0.0987302	0.261643	0.701211	0.0388747	0.0168204	0.632471	0.416253
YGL070C	RPB9	-1.3388	-1.1447	-1.01996	-1.34702	-1.37723	-1.85245	-1.19541	0.027591	0.0643035	0.0738897	0.0265813	0.0215607	0.00740248	0.0269293	-1.3388	-1.1447	-1.01996	-1.34702	-1.37723	-1.85245	-1.19541	0.027591	0.0643035	0.0738897	0.0265813	0.0215607	0.00740248	0.0269293
YGL076C	RPL7A	-0.188041	-0.229601	-0.88126	-0.523305	0.0129371	-0.213739	-1.25094	0.812197	0.775372	0.168054	0.497818	0.986228	0.795625	0.0375955	-0.188041	-0.229601	-0.88126	-0.523305	0.0129371	-0.213739	-1.25094	0.812197	0.775372	0.168054	0.497818	0.986228	0.795625	0.0375955
YGL078C	DBP3	0.0563095	-0.39644	-0.681223	-0.598101	-0.240666	-0.295626	-0.741055	0.919622	0.383639	0.0989812	0.156317	0.591334	0.528145	0.0533004	0.0563095	-0.39644	-0.681223	-0.598101	-0.240666	-0.295626	-0.741055	0.919622	0.383639	0.0989812	0.156317	0.591334	0.528145	0.0533004
YGL079W	KXD1	0.212512	-0.319905	-0.356092	-1.07553	0.11317	-0.895298	-0.447395	0.774532	0.656866	0.59242	0.0886227	0.877312	0.208085	0.439409	0.212512	-0.319905	-0.356092	-1.07553	0.11317	-0.895298	-0.447395	0.774532	0.656866	0.59242	0.0886227	0.877312	0.208085	0.439409
YGL082W	YGL082W	-1.63892	-1.00668	-1.12228	-0.31125	NA	-0.873287	-1.24314	0.12528	0.321963	0.23575	0.7764	NA	0.382557	0.17736	-1.63892	-1.00668	-1.12228	-0.31125	NA	-0.873287	-1.24314	0.12528	0.321963	0.23575	0.7764	NA	0.382557	0.17736
YGL083W	SCY1	-0.506458	-0.831229	-0.319219	-0.939509	-1.57648	-0.575838	NA	0.621944	0.403	0.749541	0.321703	0.095643	0.600892	NA	-0.506458	-0.831229	-0.319219	-0.939509	-1.57648	-0.575838	NA	0.621944	0.403	0.749541	0.321703	0.095643	0.600892	NA
YGL086W	MAD1	0.206618	-0.427003	NA	NA	-1.18775	-0.537214	0.184749	0.923794	0.849599	NA	NA	0.502419	0.806519	0.924413	0.206618	-0.427003	NA	NA	-1.18775	-0.537214	0.184749	0.923794	0.849599	NA	NA	0.502419	0.806519	0.924413
YGL087C	MMS2	-1.03452	-0.0374421	0.562122	0.813029	-0.923561	-0.0543099	0.017702	0.0179555	0.947477	0.170201	0.0554461	0.0296673	0.925148	0.970311	-1.03452	-0.0374421	0.562122	0.813029	-0.923561	-0.0543099	0.017702	0.0179555	0.947477	0.170201	0.0554461	0.0296673	0.925148	0.970311
YGL091C	NBP35	0.20994	0.504935	0.0624939	0.866102	0.262342	0.609715	0.254458	0.540229	0.117256	0.862743	0.0102201	0.417154	0.053353	0.427953	0.20994	0.504935	0.0624939	0.866102	0.262342	0.609715	0.254458	0.540229	0.117256	0.862743	0.0102201	0.417154	0.053353	0.427953
YGL092W	NUP145	-0.219394	-0.654653	-1.07616	-0.0450153	-0.602164	0.192237	-0.448179	0.793187	0.322363	0.0768527	0.960098	0.350893	0.806519	0.437957	-0.219394	-0.654653	-1.07616	-0.0450153	-0.602164	0.192237	-0.448179	0.793187	0.322363	0.0768527	0.960098	0.350893	0.806519	0.437957
YGL095C	VPS45	-1.98589	-0.440835	-1.3251	-0.434236	-1.11477	0.188552	-0.962888	0.0126491	0.604776	0.0722078	0.593942	0.141505	0.844033	0.157364	-1.98589	-0.440835	-1.3251	-0.434236	-1.11477	0.188552	-0.962888	0.0126491	0.604776	0.0722078	0.593942	0.141505	0.844033	0.157364
YGL097W	SRM1	-0.460402	-0.502373	-0.403342	-0.586386	-0.651456	0.0726942	-1.1676	0.424977	0.38562	0.468913	0.284309	0.237556	0.921524	0.020439	-0.460402	-0.502373	-0.403342	-0.586386	-0.651456	0.0726942	-1.1676	0.424977	0.38562	0.468913	0.284309	0.237556	0.921524	0.020439
YGL099W	LSG1	-0.276636	-0.844183	-1.31156	-0.597502	-0.405168	-0.812533	-1.26534	0.549495	0.0587586	0.00322959	0.1547	0.351589	0.055501	0.0026222	-0.276636	-0.844183	-1.31156	-0.597502	-0.405168	-0.812533	-1.26534	0.549495	0.0587586	0.00322959	0.1547	0.351589	0.055501	0.0026222
YGL100W	SEH1	-0.497683	-0.329958	-0.388277	-0.478623	-0.0838553	-0.175061	-0.636972	0.172345	0.385036	0.265233	0.175123	0.840163	0.671833	0.0477494	-0.497683	-0.329958	-0.388277	-0.478623	-0.0838553	-0.175061	-0.636972	0.172345	0.385036	0.265233	0.175123	0.840163	0.671833	0.0477494
YGL101W	YGL101W	-0.421385	-1.30094	-1.19217	-0.671637	-1.67689	#NAME?	-2.03328	0.541668	0.0599096	0.060979	0.295173	0.025652	NA	0.0200464	-0.421385	-1.30094	-1.19217	-0.671637	-1.67689	-11.1947	-2.03328	0.541668	0.0599096	0.060979	0.295173	0.025652	0.0144296	0.0200464
YGL103W	RPL28	0.200854	0.00647705	-0.684849	-0.73538	-0.0750861	-0.382912	-0.707943	0.235048	0.975707	0.000317598	0.000338779	0.666461	0.0218073	0.000155838	0.200854	0.00647705	-0.684849	-0.73538	-0.0750861	-0.382912	-0.707943	0.235048	0.975707	0.000317598	0.000338779	0.666461	0.0218073	0.000155838
YGL105W	ARC1	-0.163404	-0.605709	-0.440981	-0.2943	-0.330125	-0.266888	-0.980787	0.412958	0.00467773	0.0196693	0.116563	0.0773794	0.157878	3.20494e-05	-0.163404	-0.605709	-0.440981	-0.2943	-0.330125	-0.266888	-0.980787	0.412958	0.00467773	0.0196693	0.116563	0.0773794	0.157878	3.20494e-05
YGL106W	MLC1	-0.680843	-0.0817415	0.10636	0.0277845	-0.813722	0.0833172	-0.152315	0.00962874	0.788178	0.690754	0.934512	0.0025692	0.786806	0.511279	-0.680843	-0.0817415	0.10636	0.0277845	-0.813722	0.0833172	-0.152315	0.00962874	0.788178	0.690754	0.934512	0.0025692	0.786806	0.511279
YGL111W	NSA1	-0.634263	-0.795965	-0.974664	-0.999939	-1.47909	-1.16241	-1.47232	0.132448	0.0662285	0.0187319	0.0200002	0.00136346	0.00709982	0.000728685	-0.634263	-0.795965	-0.974664	-0.999939	-1.47909	-1.16241	-1.47232	0.132448	0.0662285	0.0187319	0.0200002	0.00136346	0.00709982	0.000728685
YGL112C	TAF6	-0.032913	-0.963981	-0.609855	-0.708389	-0.76061	-0.577909	-0.795662	0.964732	0.0703912	0.267112	0.156548	0.1763	0.259384	0.116236	-0.032913	-0.963981	-0.609855	-0.708389	-0.76061	-0.577909	-0.795662	0.964732	0.0703912	0.267112	0.156548	0.1763	0.259384	0.116236
YGL115W	SNF4	-0.46198	-0.42453	-0.520441	-0.788447	-0.110124	0.18636	-1.4315	0.350836	0.403	0.264178	0.0985612	0.84183	0.741448	0.0227792	-0.46198	-0.42453	-0.520441	-0.788447	-0.110124	0.18636	-1.4315	0.350836	0.403	0.264178	0.0985612	0.84183	0.741448	0.0227792
YGL116W	CDC20	0.142967	0.665609	0.270882	0.357239	-0.0797364	-0.214545	0.152439	0.822028	0.21975	0.624289	0.513771	0.896722	0.726857	0.774103	0.142967	0.665609	0.270882	0.357239	-0.0797364	-0.214545	0.152439	0.822028	0.21975	0.624289	0.513771	0.896722	0.726857	0.774103
YGL119W	COQ8	-0.0811608	NA	NA	NA	NA	-0.132556	NA	0.942894	NA	NA	NA	NA	0.903806	NA	-0.0811608	NA	NA	NA	NA	-0.132556	NA	0.942894	NA	NA	NA	NA	0.903806	NA
YGL120C	PRP43	0.0549701	-0.916086	-1.50348	-1.29129	-0.0963572	-0.566516	-2.29997	0.900799	0.0156808	0.000240987	0.00140902	0.809918	0.105743	3.25603e-06	0.0549701	-0.916086	-1.50348	-1.29129	-0.0963572	-0.566516	-2.29997	0.900799	0.0156808	0.000240987	0.00140902	0.809918	0.105743	3.25603e-06
YGL122C	NAB2	-0.380588	0.694753	0.421173	0.555155	0.630369	-0.256438	-0.0485618	0.655822	0.391816	0.599424	0.484004	0.42162	0.786806	0.955195	-0.380588	0.694753	0.421173	0.555155	0.630369	-0.256438	-0.0485618	0.655822	0.391816	0.599424	0.484004	0.42162	0.786806	0.955195
YGL123W	RPS2	0.0408135	-0.354157	-0.538881	-0.515961	-0.218348	-0.419467	-0.724993	0.888842	0.135668	0.0198474	0.029203	0.3592	0.0702215	0.00185975	0.0408135	-0.354157	-0.538881	-0.515961	-0.218348	-0.419467	-0.724993	0.888842	0.135668	0.0198474	0.029203	0.3592	0.0702215	0.00185975
YGL125W	MET13	-1.8183	-1.52191	-0.901056	0.553448	0.271962	-1.93453	-1.78304	0.000202507	0.00126969	0.0228241	0.160756	0.515992	7.55336e-05	0.000110946	-1.8183	-1.52191	-0.901056	0.553448	0.271962	-1.93453	-1.78304	0.000202507	0.00126969	0.0228241	0.160756	0.515992	7.55336e-05	0.000110946
YGL129C	RSM23	0.281987	-0.500021	-0.013984	0.55956	0.321244	1.47012	-0.132768	0.782034	0.604776	0.988745	0.586346	0.73774	0.0895318	0.883914	0.281987	-0.500021	-0.013984	0.55956	0.321244	1.47012	-0.132768	0.782034	0.604776	0.988745	0.586346	0.73774	0.0895318	0.883914
YGL130W	CEG1	-0.612271	-0.987412	-0.88412	-0.868194	-0.914529	-0.376067	-1.17704	0.422308	0.182682	0.205876	0.228072	0.206551	0.650642	0.0682434	-0.612271	-0.987412	-0.88412	-0.868194	-0.914529	-0.376067	-1.17704	0.422308	0.182682	0.205876	0.228072	0.206551	0.650642	0.0682434
YGL137W	SEC27	-0.582351	-0.534259	-0.510056	-0.825523	-0.728752	-0.566356	-1.53961	0.00519289	0.011647	0.00975846	0.000520308	0.000968181	0.00582999	6.46418e-07	-0.582351	-0.534259	-0.510056	-0.825523	-0.728752	-0.566356	-1.53961	0.00519289	0.011647	0.00975846	0.000520308	0.000968181	0.00582999	6.46418e-07
YGL139W	FLC3	0.707661	#NAME?	0.352066	-0.336913	0.660579	0.193183	-0.134332	0.358859	NA	0.639376	0.574744	0.276601	0.828413	0.814541	0.707661	-11.5293	0.352066	-0.336913	0.660579	0.193183	-0.134332	0.358859	0.0341939	0.639376	0.574744	0.276601	0.828413	0.814541
YGL141W	HUL5	-0.0837427	-0.795474	0.640512	-6.76431	-1.12458	#NAME?	#NAME?	0.979024	0.71714	0.792964	0.0685495	0.575367	NA	NA	-0.0837427	-0.795474	0.640512	-6.76431	-1.12458	-7.01775	-10.8897	0.979024	0.71714	0.792964	0.0685495	0.575367	0.0199059	0.0369055
YGL147C	RPL9A	-0.315868	-0.478307	-0.955303	-2.51303	-1.25352	-0.751325	-0.690931	0.747069	0.609757	0.242312	0.00570082	0.130564	0.389455	0.363923	-0.315868	-0.478307	-0.955303	-2.51303	-1.25352	-0.751325	-0.690931	0.747069	0.609757	0.242312	0.00570082	0.130564	0.389455	0.363923
YGL148W	ARO2	0.182639	0.0230796	-0.162372	0.431663	0.56042	0.00230982	0.0646234	0.343535	0.927824	0.381463	0.0239715	0.00450905	0.994592	0.726142	0.182639	0.0230796	-0.162372	0.431663	0.56042	0.00230982	0.0646234	0.343535	0.927824	0.381463	0.0239715	0.00450905	0.994592	0.726142
YGL153W	PEX14	0.164742	0.213973	0.560773	0.160999	-0.0693217	-0.764636	-0.884789	0.761263	0.696376	0.166433	0.730373	0.884057	0.103758	0.0237611	0.164742	0.213973	0.560773	0.160999	-0.0693217	-0.764636	-0.884789	0.761263	0.696376	0.166433	0.730373	0.884057	0.103758	0.0237611
YGL157W	ARI1	-0.495892	0.107486	0.144809	-0.461796	-0.00922714	0.205421	-0.0899583	0.118393	0.778763	0.666072	0.135114	0.978677	0.550085	0.777505	-0.495892	0.107486	0.144809	-0.461796	-0.00922714	0.205421	-0.0899583	0.118393	0.778763	0.666072	0.135114	0.978677	0.550085	0.777505
YGL164C	YRB30	-0.70922	-0.418947	-0.327322	-1.12737	#NAME?	0.80646	-0.806549	0.204276	0.516846	0.597242	0.142808	NA	0.143297	0.138437	-0.70922	-0.418947	-0.327322	-1.12737	-9.09122	0.80646	-0.806549	0.204276	0.516846	0.597242	0.142808	0.032239	0.143297	0.138437
YGL167C	PMR1	-0.818982	-0.672475	NA	NA	0.687667	-0.0132219	NA	0.572612	0.654894	NA	NA	0.599129	0.995259	NA	-0.818982	-0.672475	NA	NA	0.687667	-0.0132219	NA	0.572612	0.654894	NA	NA	0.599129	0.995259	NA
YGL169W	SUA5	-0.992567	-0.613801	0.189454	-1.11452	0.140571	0.423436	-0.4166	0.0645357	0.313551	0.730542	0.0599103	0.869165	0.43666	0.376091	-0.992567	-0.613801	0.189454	-1.11452	0.140571	0.423436	-0.4166	0.0645357	0.313551	0.730542	0.0599103	0.869165	0.43666	0.376091
YGL171W	ROK1	-0.852622	-0.793604	-3.13585	-1.53464	-0.648	-0.417375	-2.42005	0.227974	0.268952	0.000144576	0.0288871	0.35892	0.58457	0.000787854	-0.852622	-0.793604	-3.13585	-1.53464	-0.648	-0.417375	-2.42005	0.227974	0.268952	0.000144576	0.0288871	0.35892	0.58457	0.000787854
YGL172W	NUP49	-2.08586	-2.21825	-1.37579	-1.90936	-1.56338	-3.44312	-2.4497	0.0655115	0.0588178	0.20488	0.0857188	0.158321	0.00373092	0.018612	-2.08586	-2.21825	-1.37579	-1.90936	-1.56338	-3.44312	-2.4497	0.0655115	0.0588178	0.20488	0.0857188	0.158321	0.00373092	0.018612
YGL173C	XRN1	-0.376	-0.557486	-1.10092	-1.56698	-0.519134	-0.471876	-1.90943	0.266647	0.100295	0.00183526	0.000200616	0.112759	0.153396	1.11652e-05	-0.376	-0.557486	-1.10092	-1.56698	-0.519134	-0.471876	-1.90943	0.266647	0.100295	0.00183526	0.000200616	0.112759	0.153396	1.11652e-05
YGL174W	BUD13	-0.471953	-1.7287	#NAME?	-3.23751	#NAME?	-0.415864	-5.12781	0.893519	0.55513	NA	0.235532	NA	0.903806	0.121727	-0.471953	-1.7287	-12.31	-3.23751	-11.0254	-0.415864	-5.12781	0.893519	0.55513	0.0306454	0.235532	0.0231143	0.903806	0.121727
YGL181W	GTS1	-1.75957	-0.825141	-1.63489	-2.12514	-1.40642	0.222822	-1.72901	0.141758	0.521425	0.150487	0.069327	0.237556	0.883858	0.0991995	-1.75957	-0.825141	-1.63489	-2.12514	-1.40642	0.222822	-1.72901	0.141758	0.521425	0.150487	0.069327	0.237556	0.883858	0.0991995
YGL185C	YGL185C	#NAME?	#NAME?	#NAME?	#NAME?	-1.03349	-1.52481	#NAME?	NA	NA	NA	NA	0.147437	0.114379	NA	-10.5739	-10.1702	-10.816	-9.19172	-1.03349	-1.52481	-12.7039	0.0313568	0.0256874	0.015886	0.0448869	0.147437	0.114379	0.0476663
YGL187C	COX4	-2.62049	-3.45229	0.546374	-0.470216	-2.25377	1.78367	0.90912	5.80493e-05	9.50261e-06	0.269794	0.36636	0.000235664	0.00142812	0.0469789	-2.62049	-3.45229	0.546374	-0.470216	-2.25377	1.78367	0.90912	5.80493e-05	9.50261e-06	0.269794	0.36636	0.000235664	0.00142812	0.0469789
YGL189C	RPS26A	0.239766	0.0206752	0.179851	0.471956	0.63607	-0.239431	0.311673	0.598732	0.970598	0.686868	0.254669	0.121941	0.607793	0.41179	0.239766	0.0206752	0.179851	0.471956	0.63607	-0.239431	0.311673	0.598732	0.970598	0.686868	0.254669	0.121941	0.607793	0.41179
YGL190C	CDC55	-0.0498939	-0.116894	0.362557	-0.467177	-0.0888692	0.0934435	-0.78018	0.944792	0.859411	0.495674	0.379922	0.881494	0.891931	0.090871	-0.0498939	-0.116894	0.362557	-0.467177	-0.0888692	0.0934435	-0.78018	0.944792	0.859411	0.495674	0.379922	0.881494	0.891931	0.090871
YGL191W	COX13	-0.636772	-0.909489	1.07203	0.0848593	-1.44069	2.22895	0.98639	0.251798	0.104395	0.0276168	0.900909	0.00610795	0.00027435	0.0279677	-0.636772	-0.909489	1.07203	0.0848593	-1.44069	2.22895	0.98639	0.251798	0.104395	0.0276168	0.900909	0.00610795	0.00027435	0.0279677
YGL194C	HOS2	1.86837	NA	NA	NA	NA	NA	NA	0.212666	NA	NA	NA	NA	NA	NA	1.86837	NA	NA	NA	NA	NA	NA	0.212666	NA	NA	NA	NA	NA	NA
YGL195W	GCN1	0.0461318	-0.471425	-1.46077	-1.05788	0.110801	-0.596969	-1.80239	0.949773	0.388415	0.00576846	0.041767	0.851255	0.253627	0.000810825	0.0461318	-0.471425	-1.46077	-1.05788	0.110801	-0.596969	-1.80239	0.949773	0.388415	0.00576846	0.041767	0.851255	0.253627	0.000810825
YGL196W	DSD1	-0.0217988	NA	NA	0.0243743	0.658623	NA	NA	0.99083	NA	NA	0.990753	0.652887	NA	NA	-0.0217988	NA	NA	0.0243743	0.658623	NA	NA	0.99083	NA	NA	0.990753	0.652887	NA	NA
YGL200C	EMP24	-0.357934	0.0229541	-0.413669	-0.788445	0.136853	-0.448793	-0.902483	0.547729	0.973789	0.454539	0.142168	0.828738	0.434402	0.0639714	-0.357934	0.0229541	-0.413669	-0.788445	0.136853	-0.448793	-0.902483	0.547729	0.973789	0.454539	0.142168	0.828738	0.434402	0.0639714
YGL201C	MCM6	-0.434741	-0.659012	-1.14138	-0.53242	-0.306796	-0.438542	-1.05959	0.361646	0.162092	0.0134731	0.248068	0.525971	0.355397	0.0138279	-0.434741	-0.659012	-1.14138	-0.53242	-0.306796	-0.438542	-1.05959	0.361646	0.162092	0.0134731	0.248068	0.525971	0.355397	0.0138279
YGL202W	ARO8	-0.342136	-0.0396514	-0.239086	0.809894	0.0606076	-0.140707	-0.0975078	0.0995874	0.882463	0.231193	0.000804722	0.79357	0.529925	0.618357	-0.342136	-0.0396514	-0.239086	0.809894	0.0606076	-0.140707	-0.0975078	0.0995874	0.882463	0.231193	0.000804722	0.79357	0.529925	0.618357
YGL203C	KEX1	-0.167823	-0.606759	-0.809329	-0.537316	-0.300962	-1.41868	-0.541278	0.876794	0.517815	0.339856	0.552723	0.755156	0.140599	0.498717	-0.167823	-0.606759	-0.809329	-0.537316	-0.300962	-1.41868	-0.541278	0.876794	0.517815	0.339856	0.552723	0.755156	0.140599	0.498717
YGL206C	CHC1	-1.03803	-0.273251	-0.810017	-0.760288	-0.529844	-0.204025	-1.18712	4.61242e-05	0.17367	0.000317598	0.000877677	0.00865997	0.30863	5.98326e-06	-1.03803	-0.273251	-0.810017	-0.760288	-0.529844	-0.204025	-1.18712	4.61242e-05	0.17367	0.000317598	0.000877677	0.00865997	0.30863	5.98326e-06
YGL207W	SPT16	-0.39847	-0.354652	-0.97265	-0.696843	-0.368913	-0.254953	-1.64527	0.125801	0.178939	0.000674475	0.0103694	0.146791	0.33209	3.98667e-06	-0.39847	-0.354652	-0.97265	-0.696843	-0.368913	-0.254953	-1.64527	0.125801	0.178939	0.000674475	0.0103694	0.146791	0.33209	3.98667e-06
YGL211W	NCS6	#NAME?	-1.97616	#NAME?	#NAME?	#NAME?	-1.89303	#NAME?	NA	0.203373	NA	NA	NA	0.256041	NA	-9.13968	-1.97616	-9.38175	-7.75746	-8.0972	-1.89303	-11.2696	0.0176723	0.203373	0.0306615	0.0129606	0.0147569	0.256041	0.0404735
YGL213C	SKI8	0.150581	-0.853163	-1.13216	-1.03583	-0.89929	-1.09286	-1.95491	0.75901	0.052263	0.00779101	0.0171876	0.0310771	0.0111231	7.75024e-05	0.150581	-0.853163	-1.13216	-1.03583	-0.89929	-1.09286	-1.95491	0.75901	0.052263	0.00779101	0.0171876	0.0310771	0.0111231	7.75024e-05
YGL220W	BOL2	-0.224021	-0.8537	-0.0482717	-0.0159216	-0.43066	-0.192249	-0.597104	0.801686	0.400006	0.955647	0.990149	0.540435	0.819367	0.383434	-0.224021	-0.8537	-0.0482717	-0.0159216	-0.43066	-0.192249	-0.597104	0.801686	0.400006	0.955647	0.990149	0.540435	0.819367	0.383434
YGL221C	NIF3	-0.657785	-0.273305	-0.177006	-0.409378	-0.664174	-0.0527622	-0.563261	0.00340144	0.201756	0.390317	0.0488655	0.00293177	0.837599	0.00483563	-0.657785	-0.273305	-0.177006	-0.409378	-0.664174	-0.0527622	-0.563261	0.00340144	0.201756	0.390317	0.0488655	0.00293177	0.837599	0.00483563
YGL224C	SDT1	-1.02796	-1.91395	-1.88287	1.36469	-0.488124	-0.647953	#NAME?	0.492564	0.209072	0.184567	0.207936	0.654031	0.574523	NA	-1.02796	-1.91395	-1.88287	1.36469	-0.488124	-0.647953	-9.63262	0.492564	0.209072	0.184567	0.207936	0.654031	0.574523	0.0482397
YGL227W	VID30	0.419532	NA	NA	0.293773	-0.0988718	1.52016	0.231071	0.7674	NA	NA	0.84036	0.94146	0.225304	0.854862	0.419532	NA	NA	0.293773	-0.0988718	1.52016	0.231071	0.7674	NA	NA	0.84036	0.94146	0.225304	0.854862
YGL228W	SHE10	-1.44335	1.39731	0.7736	-0.317556	-0.242803	0.709063	0.159293	0.0321965	0.0263551	0.173664	0.612822	0.699935	0.23307	0.793317	-1.44335	1.39731	0.7736	-0.317556	-0.242803	0.709063	0.159293	0.0321965	0.0263551	0.173664	0.612822	0.699935	0.23307	0.793317
YGL231C	EMC4	-0.825068	0.662826	-1.28578	-0.406804	-0.0502796	-0.151645	-0.968378	0.372398	0.544807	0.294446	0.674288	0.957626	0.8975	0.223596	-0.825068	0.662826	-1.28578	-0.406804	-0.0502796	-0.151645	-0.968378	0.372398	0.544807	0.294446	0.674288	0.957626	0.8975	0.223596
YGL232W	TAN1	-0.771356	-0.6217	-0.714227	-0.734636	-0.572473	-1.04603	-1.47689	0.167682	0.275191	0.176325	0.17475	0.301132	0.055501	0.00511666	-0.771356	-0.6217	-0.714227	-0.734636	-0.572473	-1.04603	-1.47689	0.167682	0.275191	0.176325	0.17475	0.301132	0.055501	0.00511666
YGL234W	ADE5,7	-0.0199875	-0.0751324	-0.18529	-0.307805	-0.0166275	0.668091	-0.251605	0.933085	0.721349	0.290995	0.0843865	0.934288	0.000884762	0.11716	-0.0199875	-0.0751324	-0.18529	-0.307805	-0.0166275	0.668091	-0.251605	0.933085	0.721349	0.290995	0.0843865	0.934288	0.000884762	0.11716
YGL238W	CSE1	-0.448901	-0.620837	-0.994516	-1.1192	0.345567	0.0398187	0.28783	0.552609	0.403	0.192112	0.112278	0.636829	0.970013	0.771951	-0.448901	-0.620837	-0.994516	-1.1192	0.345567	0.0398187	0.28783	0.552609	0.403	0.192112	0.112278	0.636829	0.970013	0.771951
YGL242C	YGL242C	-0.48989	0.0230615	-0.300451	-0.159766	-0.412651	0.243868	-0.701204	0.179783	0.963192	0.398722	0.683705	0.255572	0.531917	0.0306561	-0.48989	0.0230615	-0.300451	-0.159766	-0.412651	0.243868	-0.701204	0.179783	0.963192	0.398722	0.683705	0.255572	0.531917	0.0306561
YGL244W	RTF1	-0.962719	-0.877721	-0.632765	-0.781562	-1.03573	-0.0594116	-0.966471	0.0429791	0.0731382	0.163703	0.0940084	0.0279116	0.925619	0.0248436	-0.962719	-0.877721	-0.632765	-0.781562	-1.03573	-0.0594116	-0.966471	0.0429791	0.0731382	0.163703	0.0940084	0.0279116	0.925619	0.0248436
YGL245W	GUS1	-0.10734	-0.277004	-0.713823	-0.496296	-0.0436856	-0.236397	-1.26871	0.576995	0.123921	0.00037445	0.00821477	0.82983	0.178706	1.20201e-06	-0.10734	-0.277004	-0.713823	-0.496296	-0.0436856	-0.236397	-1.26871	0.576995	0.123921	0.00037445	0.00821477	0.82983	0.178706	1.20201e-06
YGL246C	RAI1	0.301204	-0.111141	#NAME?	-0.489704	0.81502	-0.441544	#NAME?	0.7049	0.916994	NA	0.648638	0.435066	0.699052	NA	0.301204	-0.111141	-11.5671	-0.489704	0.81502	-0.441544	-13.4549	0.7049	0.916994	0.0371311	0.648638	0.435066	0.699052	0.0199676
YGL252C	RTG2	-0.178453	0.376444	-0.847614	-0.214398	0.548606	0.661074	-0.317568	0.849384	0.666757	0.252682	0.811023	0.487278	0.405589	0.665502	-0.178453	0.376444	-0.847614	-0.214398	0.548606	0.661074	-0.317568	0.849384	0.666757	0.252682	0.811023	0.487278	0.405589	0.665502
YGL253W	HXK2	0.11242	0.368677	-1.12174	-0.488881	-0.33265	0.773345	0.821555	0.688448	0.146015	0.000147965	0.0492704	0.176737	0.00334874	0.00122789	0.11242	0.368677	-1.12174	-0.488881	-0.33265	0.773345	0.821555	0.688448	0.146015	0.000147965	0.0492704	0.176737	0.00334874	0.00122789
YGL255W	ZRT1	Inf	Inf	NA	Inf	Inf	Inf	Inf	NA	NA	NA	NA	NA	NA	NA	13.3886	11.809	NA	11.5754	11.8433	11.6869	10.5442	0.0269728	0.0183467	NA	0.0203111	0.0463544	0.0251145	0.0445493
YGL256W	ADH4	5.1198	3.41327	-0.247489	2.51897	0.0359801	3.16218	2.43673	2.5293e-08	9.43884e-06	0.6597	9.19302e-05	0.944466	3.57415e-06	4.13568e-05	5.1198	3.41327	-0.247489	2.51897	0.0359801	3.16218	2.43673	2.5293e-08	9.43884e-06	0.6597	9.19302e-05	0.944466	3.57415e-06	4.13568e-05
YGR001C	EFM5	-0.917733	-0.705101	-0.938334	-0.0738971	-0.264567	-0.902011	-1.04745	0.0131668	0.059168	0.00932924	0.867997	0.475748	0.0133266	0.00285276	-0.917733	-0.705101	-0.938334	-0.0738971	-0.264567	-0.902011	-1.04745	0.0131668	0.059168	0.00932924	0.867997	0.475748	0.0133266	0.00285276
YGR002C	SWC4	-1.52985	-1.64218	-1.2738	-1.30693	-1.76391	-1.82161	-1.64612	0.00962974	0.0131746	0.0269757	0.020298	0.00642886	0.0151535	0.00525674	-1.52985	-1.64218	-1.2738	-1.30693	-1.76391	-1.82161	-1.64612	0.00962974	0.0131746	0.0269757	0.020298	0.00642886	0.0151535	0.00525674
YGR005C	TFG2	0.0617515	0.0209146	0.116399	-0.559228	-1.02716	-0.445754	-0.929969	0.959138	0.98434	0.905347	0.514052	0.214374	0.633905	0.204894	0.0617515	0.0209146	0.116399	-0.559228	-1.02716	-0.445754	-0.929969	0.959138	0.98434	0.905347	0.514052	0.214374	0.633905	0.204894
YGR007W	ECT1	0.175948	-0.277817	-0.510658	-0.217711	-1.08073	-1.14182	-1.26324	0.902466	0.850239	0.677496	0.894725	0.36059	0.337154	0.396466	0.175948	-0.277817	-0.510658	-0.217711	-1.08073	-1.14182	-1.26324	0.902466	0.850239	0.677496	0.894725	0.36059	0.337154	0.396466
YGR008C	STF2	-3.1033	-1.37509	1.77928	-0.282898	-3.28284	0.403273	1.00204	0.00425279	0.126721	0.0390283	0.778973	0.00264461	0.689149	0.199759	-3.1033	-1.37509	1.77928	-0.282898	-3.28284	0.403273	1.00204	0.00425279	0.126721	0.0390283	0.778973	0.00264461	0.689149	0.199759
YGR009C	SEC9	-1.22179	-0.538938	-0.620611	-0.184469	-0.510132	-0.147699	-0.358869	0.0306694	0.354354	0.248557	0.773383	0.419439	0.833233	0.479553	-1.22179	-0.538938	-0.620611	-0.184469	-0.510132	-0.147699	-0.358869	0.0306694	0.354354	0.248557	0.773383	0.419439	0.833233	0.479553
YGR010W	NMA2	-0.390313	-0.200278	-0.396751	-0.646605	#NAME?	#NAME?	0.610025	0.589493	0.746928	0.562424	0.365548	NA	NA	0.208158	-0.390313	-0.200278	-0.396751	-0.646605	-9.16194	-8.46239	0.610025	0.589493	0.746928	0.562424	0.365548	0.0436246	0.0198371	0.208158
YGR012W	MCY1	-1.00784	0.319281	0.322066	0.203801	-0.107659	0.885776	-0.201067	0.112215	0.654894	0.626315	0.778973	0.881494	0.156935	0.749685	-1.00784	0.319281	0.322066	0.203801	-0.107659	0.885776	-0.201067	0.112215	0.654894	0.626315	0.778973	0.881494	0.156935	0.749685
YGR013W	SNU71	-0.574887	-0.900258	-0.00974508	#NAME?	-1.08437	-0.773782	-0.98124	0.356232	0.255969	0.989454	NA	0.167018	0.186823	0.0956146	-0.574887	-0.900258	-0.00974508	-9.07179	-1.08437	-0.773782	-0.98124	0.356232	0.255969	0.989454	0.0129516	0.167018	0.186823	0.0956146
YGR017W	YGR017W	-0.636401	-0.0152536	-0.361433	-0.340202	-0.366098	0.969833	0.569396	0.258588	0.982215	0.482602	0.5151	0.483087	0.055501	0.204894	-0.636401	-0.0152536	-0.361433	-0.340202	-0.366098	0.969833	0.569396	0.258588	0.982215	0.482602	0.5151	0.483087	0.055501	0.204894
YGR019W	UGA1	-0.925034	0.44507	2.12694	1.02341	-0.456703	1.32695	0.866243	0.0286732	0.306066	4.89445e-05	0.0174265	0.274761	0.00279453	0.0227792	-0.925034	0.44507	2.12694	1.02341	-0.456703	1.32695	0.866243	0.0286732	0.306066	4.89445e-05	0.0174265	0.274761	0.00279453	0.0227792
YGR020C	VMA7	0.290509	-0.728946	-1.09825	-1.18809	1.22458	-0.663828	-0.571207	0.605827	0.164955	0.0291206	0.0236644	0.0180962	0.194828	0.211493	0.290509	-0.728946	-1.09825	-1.18809	1.22458	-0.663828	-0.571207	0.605827	0.164955	0.0291206	0.0236644	0.0180962	0.194828	0.211493
YGR032W	GSC2	Inf	Inf	Inf	NA	NA	Inf	Inf	NA	NA	NA	NA	NA	NA	NA	10.4682	10.7509	8.17745	NA	NA	10.5141	5.38409	0.0370051	0.0327474	0.0171237	NA	NA	0.0402666	0.0417565
YGR034W	RPL26B	-0.392635	-0.906899	-0.812682	-0.957948	-0.270549	-0.738923	-1.06312	0.275723	0.0165456	0.020112	0.0102742	0.455314	0.035881	0.00232406	-0.392635	-0.906899	-0.812682	-0.957948	-0.270549	-0.738923	-1.06312	0.275723	0.0165456	0.020112	0.0102742	0.455314	0.035881	0.00232406
YGR037C	ACB1	-0.369438	0.488538	-0.10252	-0.129116	-0.259698	0.420031	0.0401703	0.161007	0.0697269	0.710822	0.646818	0.322565	0.102818	0.881959	-0.369438	0.488538	-0.10252	-0.129116	-0.259698	0.420031	0.0401703	0.161007	0.0697269	0.710822	0.646818	0.322565	0.102818	0.881959
YGR048W	UFD1	-0.319699	-0.735828	-0.464045	-0.416467	-0.439998	-0.183673	-0.398784	0.629743	0.23492	0.442658	0.504044	0.47917	0.806146	0.468725	-0.319699	-0.735828	-0.464045	-0.416467	-0.439998	-0.183673	-0.398784	0.629743	0.23492	0.442658	0.504044	0.47917	0.806146	0.468725
YGR054W	YGR054W	-0.240002	-0.557123	-1.26109	-0.551363	-0.272055	-0.617122	-1.48984	0.483377	0.0915269	0.000499535	0.0836198	0.410818	0.0546006	8.39058e-05	-0.240002	-0.557123	-1.26109	-0.551363	-0.272055	-0.617122	-1.48984	0.483377	0.0915269	0.000499535	0.0836198	0.410818	0.0546006	8.39058e-05
YGR056W	RSC1	#NAME?	-0.695813	#NAME?	#NAME?	-0.863533	-0.133056	#NAME?	NA	0.637521	NA	NA	0.555369	0.926588	NA	-10.4805	-0.695813	-10.7226	-9.09828	-0.863533	-0.133056	-12.6104	0.0435845	0.637521	0.0138857	0.0171963	0.555369	0.926588	0.0309784
YGR060W	ERG25	0.507528	-0.35986	#NAME?	#NAME?	0.904815	#NAME?	#NAME?	0.263422	0.391355	NA	NA	0.0481114	NA	NA	0.507528	-0.35986	-10.5897	-8.96537	0.904815	-8.60556	-12.4775	0.263422	0.391355	0.0149055	0.0485537	0.0481114	0.0132258	0.0167163
YGR061C	ADE6	-0.148314	-0.538595	-1.01206	-0.456445	-0.456315	-0.594331	-0.950002	0.539572	0.0225123	0.00013822	0.0408563	0.0380785	0.00936027	0.000155718	-0.148314	-0.538595	-1.01206	-0.456445	-0.456315	-0.594331	-0.950002	0.539572	0.0225123	0.00013822	0.0408563	0.0380785	0.00936027	0.000155718
YGR063C	SPT4	-0.707917	-0.490741	-0.321671	-0.718906	-1.31537	-0.0364252	-0.781859	0.355401	0.548011	0.68468	0.396282	0.0725459	0.971332	0.237179	-0.707917	-0.490741	-0.321671	-0.718906	-1.31537	-0.0364252	-0.781859	0.355401	0.548011	0.68468	0.396282	0.0725459	0.971332	0.237179
YGR074W	SMD1	0.628957	0.63017	1.49192	1.65591	0.289337	1.01718	0.258786	0.572532	0.575959	0.127321	0.100701	0.801913	0.329538	0.806742	0.628957	0.63017	1.49192	1.65591	0.289337	1.01718	0.258786	0.572532	0.575959	0.127321	0.100701	0.801913	0.329538	0.806742
YGR078C	PAC10	-0.88074	-0.786867	-1.23461	-0.780187	-0.691195	-1.18878	-1.13835	0.0662614	0.104468	0.0103154	0.0967942	0.141078	0.026357	0.0111411	-0.88074	-0.786867	-1.23461	-0.780187	-0.691195	-1.18878	-1.13835	0.0662614	0.104468	0.0103154	0.0967942	0.141078	0.026357	0.0111411
YGR080W	TWF1	-0.729645	0.273401	0.0641983	-0.372053	-0.276382	0.0471209	-0.328767	0.0440329	0.481516	0.87459	0.303316	0.454448	0.922607	0.30945	-0.729645	0.273401	0.0641983	-0.372053	-0.276382	0.0471209	-0.328767	0.0440329	0.481516	0.87459	0.303316	0.454448	0.922607	0.30945
YGR081C	SLX9	-0.561817	-0.948379	-1.31736	-0.989758	-0.729311	-1.70638	-1.10655	0.319236	0.0916918	0.0161301	0.0688899	0.180372	0.00335862	0.0266853	-0.561817	-0.948379	-1.31736	-0.989758	-0.729311	-1.70638	-1.10655	0.319236	0.0916918	0.0161301	0.0688899	0.180372	0.00335862	0.0266853
YGR082W	TOM20	-0.744317	-0.337528	-0.21521	-0.0483604	-0.960257	-0.34625	-1.07646	0.0341793	0.355944	0.548318	0.912593	0.0075402	0.329954	0.00190214	-0.744317	-0.337528	-0.21521	-0.0483604	-0.960257	-0.34625	-1.07646	0.0341793	0.355944	0.548318	0.912593	0.0075402	0.329954	0.00190214
YGR083C	GCD2	-0.307833	-0.610815	-0.953704	-1.77499	-1.04816	-0.654251	-0.731807	0.685207	0.335376	0.101657	0.00687849	0.0780208	0.289294	0.173457	-0.307833	-0.610815	-0.953704	-1.77499	-1.04816	-0.654251	-0.731807	0.685207	0.335376	0.101657	0.00687849	0.0780208	0.289294	0.173457
YGR084C	MRP13	0.75682	-0.493992	-0.287742	-0.0831716	-0.536569	1.01977	-0.276405	0.0884189	0.282928	0.525785	0.880125	0.227193	0.0218754	0.49899	0.75682	-0.493992	-0.287742	-0.0831716	-0.536569	1.01977	-0.276405	0.0884189	0.282928	0.525785	0.880125	0.227193	0.0218754	0.49899
YGR086C	PIL1	-1.14436	-0.977323	0.511506	-0.140936	-0.703823	0.023394	-0.29232	4.61242e-05	0.000344814	0.0172471	0.527938	0.0025104	0.934628	0.127199	-1.14436	-0.977323	0.511506	-0.140936	-0.703823	0.023394	-0.29232	4.61242e-05	0.000344814	0.0172471	0.527938	0.0025104	0.934628	0.127199
YGR087C	PDC6	0.378162	0.361166	2.51472	#NAME?	-0.55025	#NAME?	-0.602866	0.642253	0.700274	0.0118872	NA	0.594378	NA	0.511279	0.378162	0.361166	2.51472	-7.65457	-0.55025	-7.29476	-0.602866	0.642253	0.700274	0.0118872	0.0369564	0.594378	0.0404744	0.511279
YGR088W	CTT1	-1.40554	#NAME?	4.35749	0.815387	-0.931033	1.67877	1.87079	0.00427869	NA	5.31517e-08	0.0136118	0.0101582	9.14333e-05	3.27626e-05	-1.40554	-10.5349	4.35749	0.815387	-0.931033	1.67877	1.87079	0.00427869	0.0263596	5.31517e-08	0.0136118	0.0101582	9.14333e-05	3.27626e-05
YGR090W	UTP22	-0.609938	-0.290153	-1.48987	-1.64947	-0.567982	-0.672891	-1.47041	0.421672	0.729363	0.0337572	0.0248029	0.44055	0.364231	0.0249764	-0.609938	-0.290153	-1.48987	-1.64947	-0.567982	-0.672891	-1.47041	0.421672	0.729363	0.0337572	0.0248029	0.44055	0.364231	0.0249764
YGR092W	DBF2	-0.377367	-0.441532	-0.418433	-0.952165	0.80187	-0.283783	#NAME?	0.733105	0.715465	0.703829	0.473502	0.418281	0.858775	NA	-0.377367	-0.441532	-0.418433	-0.952165	0.80187	-0.283783	-11.1218	0.733105	0.715465	0.703829	0.473502	0.418281	0.858775	0.0424633
YGR094W	VAS1	0.38049	-0.143173	-0.850512	-0.304194	0.33575	-0.221608	-0.782427	0.0931998	0.563531	0.000674475	0.169864	0.130469	0.336699	0.000813308	0.38049	-0.143173	-0.850512	-0.304194	0.33575	-0.221608	-0.782427	0.0931998	0.563531	0.000674475	0.169864	0.130469	0.336699	0.000813308
YGR095C	RRP46	-0.143869	0.0733675	#NAME?	-0.48097	-0.518656	0.763594	#NAME?	0.842121	0.94292	NA	0.552867	0.421648	0.364231	NA	-0.143869	0.0733675	-12.3823	-0.48097	-0.518656	0.763594	-14.2702	0.842121	0.94292	0.0162383	0.552867	0.421648	0.364231	0.0444166
YGR103W	NOP7	0.381593	-0.288537	-1.1036	-1.23968	0.704804	-0.817275	-1.16559	0.349408	0.498605	0.00613662	0.00408506	0.0694824	0.0380093	0.00268967	0.381593	-0.288537	-1.1036	-1.23968	0.704804	-0.817275	-1.16559	0.349408	0.498605	0.00613662	0.00408506	0.0694824	0.0380093	0.00268967
YGR106C	VOA1	0.124401	-0.389936	#NAME?	-0.409928	0.612031	-0.819027	#NAME?	0.899403	0.634163	NA	0.632019	0.418966	0.431611	NA	0.124401	-0.389936	-9.91667	-0.409928	0.612031	-0.819027	-11.8045	0.899403	0.634163	0.0455183	0.632019	0.418966	0.431611	0.030405
YGR111W	YGR111W	-1.18829	-1.0519	-0.662939	-0.937424	-0.863147	-0.860282	-1.32756	0.410831	0.377956	0.562919	0.414313	0.410818	0.422039	0.2843	-1.18829	-1.0519	-0.662939	-0.937424	-0.863147	-0.860282	-1.32756	0.410831	0.377956	0.562919	0.414313	0.410818	0.422039	0.2843
YGR113W	DAM1	-0.00818478	0.391801	#NAME?	0.030582	#NAME?	0.733408	-0.323449	0.99637	0.782616	NA	0.980601	NA	0.578046	0.7235	-0.00818478	0.391801	-11.9651	0.030582	-10.6805	0.733408	-0.323449	0.99637	0.782616	0.0180465	0.980601	0.0414663	0.578046	0.7235
YGR116W	SPT6	0.077076	-0.649952	-1.07139	-1.03492	-0.0399804	-0.382715	-1.20327	0.918929	0.275305	0.0539019	0.0688899	0.949721	0.543852	0.0222202	0.077076	-0.649952	-1.07139	-1.03492	-0.0399804	-0.382715	-1.20327	0.918929	0.275305	0.0539019	0.0688899	0.949721	0.543852	0.0222202
YGR117C	YGR117C	-0.295686	-0.271596	#NAME?	0.200947	0.389951	-0.345318	-0.0420817	0.735166	0.73429	NA	0.800084	0.587662	0.689342	0.967051	-0.295686	-0.271596	-9.50572	0.200947	0.389951	-0.345318	-0.0420817	0.735166	0.73429	0.0200196	0.800084	0.587662	0.689342	0.967051
YGR119C	NUP57	-0.383233	-0.811864	-0.0995192	0.178627	-0.425395	-0.798508	-0.458481	0.351964	0.0521838	0.822005	0.682149	0.287833	0.0444487	0.196384	-0.383233	-0.811864	-0.0995192	0.178627	-0.425395	-0.798508	-0.458481	0.351964	0.0521838	0.822005	0.682149	0.287833	0.0444487	0.196384
YGR120C	COG2	0.645344	NA	NA	NA	NA	NA	NA	0.57276	NA	NA	NA	NA	NA	NA	0.645344	NA	NA	NA	NA	NA	NA	0.57276	NA	NA	NA	NA	NA	NA
YGR123C	PPT1	-0.695869	-1.64208	-1.93456	-1.05563	-1.56719	-0.83557	-2.0259	0.252105	0.0108595	0.00210266	0.0725764	0.0101582	0.15748	0.000970804	-0.695869	-1.64208	-1.93456	-1.05563	-1.56719	-0.83557	-2.0259	0.252105	0.0108595	0.00210266	0.0725764	0.0101582	0.15748	0.000970804
YGR124W	ASN2	-0.194168	-0.513272	-0.381703	0.837894	-0.520166	-0.112183	-0.592456	0.3117	0.0112199	0.0360837	0.000319688	0.00722124	0.588513	0.00163287	-0.194168	-0.513272	-0.381703	0.837894	-0.520166	-0.112183	-0.592456	0.3117	0.0112199	0.0360837	0.000319688	0.00722124	0.588513	0.00163287
YGR128C	UTP8	-0.162362	-0.771006	#NAME?	-1.43286	0.108979	-1.36859	#NAME?	0.802214	0.210855	NA	0.0746511	0.84437	0.0870982	NA	-0.162362	-0.771006	-12.321	-1.43286	0.108979	-1.36859	-14.2088	0.802214	0.210855	0.0381346	0.0746511	0.84437	0.0870982	0.0137326
YGR130C	YGR130C	-1.91134	-1.53637	1.31936	-0.524931	-1.67332	-0.462047	-0.669006	6.01084e-05	0.000743427	0.00114311	0.152313	0.000206061	0.21648	0.0460898	-1.91134	-1.53637	1.31936	-0.524931	-1.67332	-0.462047	-0.669006	6.01084e-05	0.000743427	0.00114311	0.152313	0.000206061	0.21648	0.0460898
YGR132C	PHB1	-1.4837	-0.774252	-0.0290858	-0.874479	-0.973136	0.577993	-0.591308	0.000714295	0.0504751	0.952074	0.0235453	0.0113956	0.12461	0.0784162	-1.4837	-0.774252	-0.0290858	-0.874479	-0.973136	0.577993	-0.591308	0.000714295	0.0504751	0.952074	0.0235453	0.0113956	0.12461	0.0784162
YGR135W	PRE9	-0.672061	-0.731492	-0.649227	-0.856826	-0.623765	-0.330702	-0.607123	0.0126491	0.00950392	0.0125684	0.00304298	0.0173031	0.202011	0.0124317	-0.672061	-0.731492	-0.649227	-0.856826	-0.623765	-0.330702	-0.607123	0.0126491	0.00950392	0.0125684	0.00304298	0.0173031	0.202011	0.0124317
YGR136W	LSB1	-0.595871	0.211224	0.214135	-0.713094	-0.23931	-0.580373	-0.231932	0.132656	0.632902	0.601292	0.0662799	0.557519	0.136389	0.525116	-0.595871	0.211224	0.214135	-0.713094	-0.23931	-0.580373	-0.231932	0.132656	0.632902	0.601292	0.0662799	0.557519	0.136389	0.525116
YGR143W	SKN1	Inf	NA	NA	NA	NA	NA	NA	NA	NA	NA	NA	NA	NA	NA	7.49672	NA	NA	NA	NA	NA	NA	0.043053	NA	NA	NA	NA	NA	NA
YGR145W	ENP2	-0.212141	-0.918494	-0.728135	-1.77967	-0.320151	-0.148974	-1.02845	0.747069	0.110261	0.179116	0.00394051	0.587257	0.83379	0.0423794	-0.212141	-0.918494	-0.728135	-1.77967	-0.320151	-0.148974	-1.02845	0.747069	0.110261	0.179116	0.00394051	0.587257	0.83379	0.0423794
YGR148C	RPL24B	-0.280751	-0.8117	-0.491206	-0.954164	-0.569124	-0.665529	-0.608132	0.466649	0.0336554	0.157394	0.012165	0.109459	0.0634147	0.0591622	-0.280751	-0.8117	-0.491206	-0.954164	-0.569124	-0.665529	-0.608132	0.466649	0.0336554	0.157394	0.012165	0.109459	0.0634147	0.0591622
YGR152C	RSR1	-0.257842	0.0902442	-0.524961	-0.354502	-0.315506	-1.13521	-1.20759	0.621944	0.883751	0.253673	0.466728	0.524437	0.0180218	0.00724113	-0.257842	0.0902442	-0.524961	-0.354502	-0.315506	-1.13521	-1.20759	0.621944	0.883751	0.253673	0.466728	0.524437	0.0180218	0.00724113
YGR155W	CYS4	-0.0880576	-0.237747	-0.397457	-0.340758	-1.17673	-0.585903	-0.182896	0.667093	0.206264	0.0266261	0.0602054	5.91095e-06	0.00269719	0.261954	-0.0880576	-0.237747	-0.397457	-0.340758	-1.17673	-0.585903	-0.182896	0.667093	0.206264	0.0266261	0.0602054	5.91095e-06	0.00269719	0.261954
YGR156W	PTI1	#NAME?	-0.246683	-0.958015	-0.686652	-0.426777	-0.819638	-0.930919	NA	0.728362	0.161599	0.446298	0.550555	0.194578	0.139009	-12.2207	-0.246683	-0.958015	-0.686652	-0.426777	-0.819638	-0.930919	0.014636	0.728362	0.161599	0.446298	0.550555	0.194578	0.139009
YGR157W	CHO2	0.536618	-0.0307392	-1.23123	-0.815145	-0.875534	-0.546401	-1.31689	0.199995	0.956486	0.00388957	0.047808	0.0323454	0.183913	0.00152162	0.536618	-0.0307392	-1.23123	-0.815145	-0.875534	-0.546401	-1.31689	0.199995	0.956486	0.00388957	0.047808	0.0323454	0.183913	0.00152162
YGR158C	MTR3	0.223561	#NAME?	#NAME?	#NAME?	-0.235637	0.467766	#NAME?	0.904378	NA	NA	NA	0.889989	0.804322	NA	0.223561	-13.268	-13.9138	-12.2895	-0.235637	0.467766	-15.8017	0.904378	0.03523	0.03552	0.0448214	0.889989	0.804322	0.0379462
YGR159C	NSR1	-0.20068	-0.840716	-0.91394	-1.45417	-0.476712	-0.984927	-1.27674	0.52666	0.00863606	0.00285339	0.000138525	0.0974801	0.0019106	0.000133088	-0.20068	-0.840716	-0.91394	-1.45417	-0.476712	-0.984927	-1.27674	0.52666	0.00863606	0.00285339	0.000138525	0.0974801	0.0019106	0.000133088
YGR162W	TIF4631	-0.408351	-0.93809	-1.10468	-0.834428	-0.492661	-0.520874	-1.22881	0.206543	0.0072286	0.00127215	0.0124012	0.114551	0.0979607	0.000339939	-0.408351	-0.93809	-1.10468	-0.834428	-0.492661	-0.520874	-1.22881	0.206543	0.0072286	0.00127215	0.0124012	0.114551	0.0979607	0.000339939
YGR165W	MRPS35	-1.38003	-1.21653	0.477447	-0.157471	-1.02473	0.642068	0.245769	0.0166848	0.0400075	0.390003	0.811023	0.0633394	0.256935	0.648097	-1.38003	-1.21653	0.477447	-0.157471	-1.02473	0.642068	0.245769	0.0166848	0.0400075	0.390003	0.811023	0.0633394	0.256935	0.648097
YGR167W	CLC1	-1.04792	-0.588787	-0.0165106	-0.695483	-0.954564	0.207314	-0.140625	0.000552039	0.032104	0.959974	0.0110967	0.00104138	0.450129	0.563992	-1.04792	-0.588787	-0.0165106	-0.695483	-0.954564	0.207314	-0.140625	0.000552039	0.032104	0.959974	0.0110967	0.00104138	0.450129	0.563992
YGR169C-A	LSO2	-0.855873	-1.02284	-0.301647	-0.33011	-0.462172	-1.24947	-0.725372	0.207725	0.180295	0.670967	0.647051	0.506278	0.0597437	0.22099	-0.855873	-1.02284	-0.301647	-0.33011	-0.462172	-1.24947	-0.725372	0.207725	0.180295	0.670967	0.647051	0.506278	0.0597437	0.22099
YGR173W	RBG2	-0.416202	-0.568331	-0.877354	-0.26885	-0.317695	-0.773132	-0.813542	0.289287	0.146093	0.0208527	0.499189	0.418562	0.0432423	0.0210754	-0.416202	-0.568331	-0.877354	-0.26885	-0.317695	-0.773132	-0.813542	0.289287	0.146093	0.0208527	0.499189	0.418562	0.0432423	0.0210754
YGR175C	ERG1	1.73375	0.134537	-0.222845	-0.174911	1.8664	0.979883	-0.0778541	0.0229022	0.890703	0.782681	0.84506	0.013492	0.187277	0.924413	1.73375	0.134537	-0.222845	-0.174911	1.8664	0.979883	-0.0778541	0.0229022	0.890703	0.782681	0.84506	0.013492	0.187277	0.924413
YGR177C	ATF2	-0.782874	-1.2551	#NAME?	#NAME?	-0.20038	#NAME?	#NAME?	0.629743	0.304483	NA	NA	0.872111	NA	NA	-0.782874	-1.2551	-10.2961	-8.6718	-0.20038	-8.31199	-12.184	0.629743	0.304483	0.0405641	0.0490206	0.872111	0.0184161	0.0253118
YGR178C	PBP1	-0.984946	-0.798687	-0.924412	-0.682263	-1.09078	-0.689031	-1.48433	0.0376584	0.0962428	0.0425775	0.140643	0.0211187	0.139903	0.00164872	-0.984946	-0.798687	-0.924412	-0.682263	-1.09078	-0.689031	-1.48433	0.0376584	0.0962428	0.0425775	0.140643	0.0211187	0.139903	0.00164872
YGR180C	RNR4	-0.313307	0.170807	0.130367	-0.288263	0.0750936	-0.433805	-0.26123	0.129274	0.434569	0.533761	0.151223	0.739457	0.0334824	0.149815	-0.313307	0.170807	0.130367	-0.288263	0.0750936	-0.433805	-0.26123	0.129274	0.434569	0.533761	0.151223	0.739457	0.0334824	0.149815
YGR181W	TIM13	-0.866487	-0.482966	0.077734	-0.120849	-0.731108	0.226022	-0.159769	0.00929001	0.133763	0.824563	0.733911	0.0215607	0.509934	0.59447	-0.866487	-0.482966	0.077734	-0.120849	-0.731108	0.226022	-0.159769	0.00929001	0.133763	0.824563	0.733911	0.0215607	0.509934	0.59447
YGR184C	UBR1	-0.518464	-1.26807	-1.02298	-0.629961	-1.16197	NA	-0.810342	0.468894	0.0888302	0.152052	0.389981	0.117447	NA	0.210608	-0.518464	-1.26807	-1.02298	-0.629961	-1.16197	NA	-0.810342	0.468894	0.0888302	0.152052	0.389981	0.117447	NA	0.210608
YGR185C	TYS1	-0.163407	-0.316882	-0.898434	-0.535805	-0.139842	-0.792918	-1.039	0.509023	0.179519	0.000505184	0.0230413	0.559484	0.0016042	0.000100412	-0.163407	-0.316882	-0.898434	-0.535805	-0.139842	-0.792918	-1.039	0.509023	0.179519	0.000505184	0.0230413	0.559484	0.0016042	0.000100412
YGR186W	TFG1	-0.810762	-0.73082	-0.103681	-0.235193	-0.251703	-0.343349	-0.108584	0.111759	0.155105	0.869937	0.668428	0.633639	0.530555	0.834653	-0.810762	-0.73082	-0.103681	-0.235193	-0.251703	-0.343349	-0.108584	0.111759	0.155105	0.869937	0.668428	0.633639	0.530555	0.834653
YGR187C	HGH1	-0.677414	-1.53057	-2.09972	-0.782204	-0.255428	-1.01273	-2.12344	0.334267	0.0336554	0.00315045	0.250084	0.733767	0.134945	0.00181081	-0.677414	-1.53057	-2.09972	-0.782204	-0.255428	-1.01273	-2.12344	0.334267	0.0336554	0.00315045	0.250084	0.733767	0.134945	0.00181081
YGR189C	CRH1	-1.36201	2.03094	1.08084	0.0782508	-0.226677	0.706151	1.06416	0.0698203	0.0118654	0.131121	0.939539	0.788696	0.359081	0.109426	-1.36201	2.03094	1.08084	0.0782508	-0.226677	0.706151	1.06416	0.0698203	0.0118654	0.131121	0.939539	0.788696	0.359081	0.109426
YGR192C	TDH3	-0.223949	0.339341	0.0989965	-0.468978	-0.33908	0.334757	0.511035	0.667093	0.498796	0.850627	0.316824	0.481869	0.50625	0.216442	-0.223949	0.339341	0.0989965	-0.468978	-0.33908	0.334757	0.511035	0.667093	0.498796	0.850627	0.316824	0.481869	0.50625	0.216442
YGR193C	PDX1	-0.71553	-0.519168	0.0812441	-0.449875	-0.301044	0.134507	-0.150362	0.0464785	0.153548	0.83866	0.202424	0.410818	0.752576	0.662644	-0.71553	-0.519168	0.0812441	-0.449875	-0.301044	0.134507	-0.150362	0.0464785	0.153548	0.83866	0.202424	0.410818	0.752576	0.662644
YGR195W	SKI6	0.21487	0.60623	0.401393	0.133318	-0.0658525	0.27786	0.0941711	0.605827	0.0895412	0.166665	0.665682	0.879942	0.400557	0.809043	0.21487	0.60623	0.401393	0.133318	-0.0658525	0.27786	0.0941711	0.605827	0.0895412	0.166665	0.665682	0.879942	0.400557	0.809043
YGR196C	FYV8	0.0885033	-0.178345	0.265674	#NAME?	0.440118	-0.150905	0.860307	0.954747	0.903512	0.82262	NA	0.701497	0.924426	0.380239	0.0885033	-0.178345	0.265674	-5.18863	0.440118	-0.150905	0.860307	0.954747	0.903512	0.82262	0.0274126	0.701497	0.924426	0.380239
YGR198W	YPP1	Inf	NA	NA	NA	Inf	NA	NA	NA	NA	NA	NA	NA	NA	NA	7.03282	NA	NA	NA	6.66488	NA	NA	0.0252542	NA	NA	NA	0.027389	NA	NA
YGR200C	ELP2	0.290419	-0.479856	-0.823557	-0.0494977	0.834854	0.228558	-0.938999	0.728416	0.544269	0.240129	0.960419	0.252991	0.79712	0.30505	0.290419	-0.479856	-0.823557	-0.0494977	0.834854	0.228558	-0.938999	0.728416	0.544269	0.240129	0.960419	0.252991	0.79712	0.30505
YGR202C	PCT1	-0.33343	-0.631383	-0.682114	-0.940802	-0.456442	-0.367562	-1.11073	0.747069	0.513188	0.399765	0.251572	0.622257	0.723248	0.131619	-0.33343	-0.631383	-0.682114	-0.940802	-0.456442	-0.367562	-1.11073	0.747069	0.513188	0.399765	0.251572	0.622257	0.723248	0.131619
YGR203W	YCH1	#NAME?	-0.0355433	0.134768	-0.411663	0.743327	2.57973	0.0706257	NA	0.98434	0.9184	0.79863	0.611342	0.0525454	0.94855	-10.3188	-0.0355433	0.134768	-0.411663	0.743327	2.57973	0.0706257	0.0184567	0.98434	0.9184	0.79863	0.611342	0.0525454	0.94855
YGR204W	ADE3	-0.335648	-0.0534835	-0.479092	-0.0332056	0.0160641	-0.0880957	-0.219248	0.0327143	0.776555	0.00313794	0.861819	0.927798	0.61398	0.112702	-0.335648	-0.0534835	-0.479092	-0.0332056	0.0160641	-0.0880957	-0.219248	0.0327143	0.776555	0.00313794	0.861819	0.927798	0.61398	0.112702
YGR205W	TDA10	-1.47923	-1.39488	0.0611891	-0.774672	-0.74885	1.8541	0.201696	0.0249475	0.0400348	0.936997	0.223168	0.299124	0.00606998	0.751076	-1.47923	-1.39488	0.0611891	-0.774672	-0.74885	1.8541	0.201696	0.0249475	0.0400348	0.936997	0.223168	0.299124	0.00606998	0.751076
YGR207C	CIR1	-1.52697	-0.596785	0.37758	0.307956	-0.459479	0.97572	0.188341	7.38125e-05	0.0596381	0.197407	0.314851	0.124747	0.00267517	0.503236	-1.52697	-0.596785	0.37758	0.307956	-0.459479	0.97572	0.188341	7.38125e-05	0.0596381	0.197407	0.314851	0.124747	0.00267517	0.503236
YGR208W	SER2	-0.174135	-0.180021	-0.920943	-1.42727	-0.28454	-1.14255	-0.972512	0.764812	0.763824	0.0581117	0.00821477	0.587257	0.0244474	0.0529329	-0.174135	-0.180021	-0.920943	-1.42727	-0.28454	-1.14255	-0.972512	0.764812	0.763824	0.0581117	0.00821477	0.587257	0.0244474	0.0529329
YGR209C	TRX2	-0.767171	-0.427636	0.24784	-0.188215	-0.359183	0.253203	-0.357172	0.00239714	0.0743938	0.26976	0.428388	0.114551	0.283087	0.0818856	-0.767171	-0.427636	0.24784	-0.188215	-0.359183	0.253203	-0.357172	0.00239714	0.0743938	0.26976	0.428388	0.114551	0.283087	0.0818856
YGR210C	YGR210C	-0.720987	-0.934109	-0.792474	-1.27876	-0.947315	-1.62129	-1.4168	0.102274	0.0426678	0.0605442	0.00659617	0.0296673	0.000884762	0.00139939	-0.720987	-0.934109	-0.792474	-1.27876	-0.947315	-1.62129	-1.4168	0.102274	0.0426678	0.0605442	0.00659617	0.0296673	0.000884762	0.00139939
YGR211W	ZPR1	0.403253	-0.300879	-0.833501	-0.881719	0.335779	-0.283834	-0.883912	0.272232	0.435432	0.0198	0.0179759	0.36106	0.457758	0.0093387	0.403253	-0.300879	-0.833501	-0.881719	0.335779	-0.283834	-0.883912	0.272232	0.435432	0.0198	0.0179759	0.36106	0.457758	0.0093387
YGR214W	RPS0A	-2.26598	NA	NA	NA	-2.84035	NA	NA	0.0618514	NA	NA	NA	0.0312178	NA	NA	-2.26598	NA	NA	NA	-2.84035	NA	NA	0.0618514	NA	NA	NA	0.0312178	NA	NA
YGR215W	RSM27	#NAME?	#NAME?	0.254173	#NAME?	#NAME?	0.680137	#NAME?	NA	NA	0.775834	NA	NA	0.347354	NA	-10.4048	-10.0011	0.254173	-9.02257	-9.36231	0.680137	-12.5347	0.0398716	0.0492106	0.775834	0.0481574	0.0347409	0.347354	0.0219697
YGR218W	CRM1	0.0310967	0.282939	-1.30098	-0.453275	0.542666	-0.692597	-1.31657	0.976656	0.744834	0.0692721	0.563167	0.48158	0.36522	0.0482389	0.0310967	0.282939	-1.30098	-0.453275	0.542666	-0.692597	-1.31657	0.976656	0.744834	0.0692721	0.563167	0.48158	0.36522	0.0482389
YGR229C	SMI1	-0.584483	-0.0992036	0.433234	-0.311156	-1.12209	-0.828307	-0.736753	0.242911	0.874836	0.370392	0.542125	0.022367	0.0884512	0.0904362	-0.584483	-0.0992036	0.433234	-0.311156	-1.12209	-0.828307	-0.736753	0.242911	0.874836	0.370392	0.542125	0.022367	0.0884512	0.0904362
YGR231C	PHB2	-0.0695376	0.222729	0.335078	0.146352	-0.397612	0.865279	-0.316314	0.782034	0.320277	0.102896	0.511079	0.0588844	0.00043561	0.0955061	-0.0695376	0.222729	0.335078	0.146352	-0.397612	0.865279	-0.316314	0.782034	0.320277	0.102896	0.511079	0.0588844	0.00043561	0.0955061
YGR232W	NAS6	-0.827029	-0.0646534	-0.26696	-0.267914	-0.743999	0.0886613	-0.87012	0.0178955	0.883751	0.435263	0.446291	0.0282329	0.835942	0.00722305	-0.827029	-0.0646534	-0.26696	-0.267914	-0.743999	0.0886613	-0.87012	0.0178955	0.883751	0.435263	0.446291	0.0282329	0.835942	0.00722305
YGR234W	YHB1	1.33499	0.658301	-1.42643	-0.707141	-1.78657	3.31683	1.49955	3.50912e-05	0.0125522	1.2706e-05	0.00699595	1.43107e-06	4.45174e-10	5.41699e-06	1.33499	0.658301	-1.42643	-0.707141	-1.78657	3.31683	1.49955	3.50912e-05	0.0125522	1.2706e-05	0.00699595	1.43107e-06	4.45174e-10	5.41699e-06
YGR235C	MIC26	0.042384	-0.00611236	NA	0.183702	NA	0.652349	-0.0217448	0.964732	0.993247	NA	0.811023	NA	0.326409	0.97564	0.042384	-0.00611236	NA	0.183702	NA	0.652349	-0.0217448	0.964732	0.993247	NA	0.811023	NA	0.326409	0.97564
YGR237C	YGR237C	Inf	Inf	Inf	NA	Inf	NA	NA	NA	NA	NA	NA	NA	NA	NA	13.6633	14.2828	8.60077	NA	8.72834	NA	NA	0.0101695	0.039795	0.0326866	NA	0.0453646	NA	NA
YGR240C	PFK1	-0.05731	-0.0627491	-0.572286	-0.546107	0.0438383	0.277378	-0.273821	0.735166	0.713243	0.000476269	0.00116094	0.788696	0.0552635	0.0368555	-0.05731	-0.0627491	-0.572286	-0.546107	0.0438383	0.277378	-0.273821	0.735166	0.713243	0.000476269	0.00116094	0.788696	0.0552635	0.0368555
YGR244C	LSC2	-1.99688	-1.86941	0.400567	-0.424838	-1.25288	1.0782	-0.486648	5.10805e-05	0.000185279	0.282024	0.264265	0.00248608	0.00664746	0.152441	-1.99688	-1.86941	0.400567	-0.424838	-1.25288	1.0782	-0.486648	5.10805e-05	0.000185279	0.282024	0.264265	0.00248608	0.00664746	0.152441
YGR245C	SDA1	0.641869	-0.47598	-1.91784	-1.54442	-0.915347	-0.942737	-1.96107	0.497294	0.63292	0.0282769	0.0788062	0.30653	0.297438	0.0298605	0.641869	-0.47598	-1.91784	-1.54442	-0.915347	-0.942737	-1.96107	0.497294	0.63292	0.0282769	0.0788062	0.30653	0.297438	0.0298605
YGR248W	SOL4	-0.637761	-0.442083	3.49435	0.239778	-0.424081	0.163122	-0.0479066	0.40368	0.618952	0.000186162	0.774352	0.60835	0.858775	0.953691	-0.637761	-0.442083	3.49435	0.239778	-0.424081	0.163122	-0.0479066	0.40368	0.618952	0.000186162	0.774352	0.60835	0.858775	0.953691
YGR250C	RIE1	-2.01985	-1.37065	-0.589083	-1.22378	-1.69088	0.231155	-0.248224	0.00133726	0.022182	0.281854	0.031912	0.00443572	0.7253	0.646623	-2.01985	-1.37065	-0.589083	-1.22378	-1.69088	0.231155	-0.248224	0.00133726	0.022182	0.281854	0.031912	0.00443572	0.7253	0.646623
YGR251W	NOP19	0.166646	#NAME?	0.189709	#NAME?	-0.245186	-0.247283	#NAME?	0.850976	NA	0.863352	NA	0.824798	0.801028	NA	0.166646	-9.18919	0.189709	-8.2107	-0.245186	-0.247283	-11.7229	0.850976	0.0385437	0.863352	0.0221463	0.824798	0.801028	0.0208614
YGR253C	PUP2	-0.284503	-0.328263	-0.150289	-0.304408	-0.412153	0.178364	-0.222005	0.212445	0.148728	0.514034	0.166511	0.061043	0.450257	0.265278	-0.284503	-0.328263	-0.150289	-0.304408	-0.412153	0.178364	-0.222005	0.212445	0.148728	0.514034	0.166511	0.061043	0.450257	0.265278
YGR254W	ENO1	-0.220729	1.4593	1.80801	0.952701	-0.502293	2.72985	1.84233	0.405693	4.07698e-05	1.32331e-06	0.00116094	0.044997	1.02427e-08	1.19947e-06	-0.220729	1.4593	1.80801	0.952701	-0.502293	2.72985	1.84233	0.405693	4.07698e-05	1.32331e-06	0.00116094	0.044997	1.02427e-08	1.19947e-06
YGR262C	BUD32	-1.45655	-1.37264	-1.15061	-0.970931	-1.12798	-0.842764	-1.67738	0.0757878	0.0706934	0.100308	0.227205	0.115019	0.247908	0.0251713	-1.45655	-1.37264	-1.15061	-0.970931	-1.12798	-0.842764	-1.67738	0.0757878	0.0706934	0.100308	0.227205	0.115019	0.247908	0.0251713
YGR264C	MES1	0.250379	-0.438793	-1.70036	-0.905974	0.0534695	-0.575979	-1.47412	0.390436	0.124291	8.13376e-06	0.00340346	0.870026	0.0393318	2.78231e-05	0.250379	-0.438793	-1.70036	-0.905974	0.0534695	-0.575979	-1.47412	0.390436	0.124291	8.13376e-06	0.00340346	0.870026	0.0393318	2.78231e-05
YGR266W	YGR266W	-0.620309	-0.0980847	0.243475	0.733854	0.0227244	0.072934	1.21708	0.486291	0.933147	0.786602	0.391146	0.979681	0.950663	0.136905	-0.620309	-0.0980847	0.243475	0.733854	0.0227244	0.072934	1.21708	0.486291	0.933147	0.786602	0.391146	0.979681	0.950663	0.136905
YGR267C	FOL2	-0.536436	-0.27149	-1.01645	0.278623	-0.810014	-1.36332	-1.17855	0.169987	0.513188	0.00932418	0.482797	0.0345829	0.0014491	0.00476404	-0.536436	-0.27149	-1.01645	0.278623	-0.810014	-1.36332	-1.17855	0.169987	0.513188	0.00932418	0.482797	0.0345829	0.0014491	0.00476404
YGR270W	YTA7	-0.480491	-0.589118	1.04148	-0.148143	-0.0746329	0.366211	-0.15385	0.68752	0.654894	0.365664	0.912593	0.949677	0.777524	0.888883	-0.480491	-0.589118	1.04148	-0.148143	-0.0746329	0.366211	-0.15385	0.68752	0.654894	0.365664	0.912593	0.949677	0.777524	0.888883
YGR271C-A	EFG1	-0.789296	-1.04329	-0.590284	-1.01304	-0.449248	0.0321885	-0.5254	0.412958	0.274808	0.532263	0.331072	0.642943	0.981708	0.588916	-0.789296	-1.04329	-0.590284	-1.01304	-0.449248	0.0321885	-0.5254	0.412958	0.274808	0.532263	0.331072	0.642943	0.981708	0.588916
YGR274C	TAF1	-0.701987	-0.369878	0.807366	-0.159373	-1.58713	-0.479037	-0.151974	0.568264	0.78721	0.483595	0.911861	0.152332	0.715047	0.899201	-0.701987	-0.369878	0.807366	-0.159373	-1.58713	-0.479037	-0.151974	0.568264	0.78721	0.483595	0.911861	0.152332	0.715047	0.899201
YGR275W	RTT102	-0.687474	-0.697138	-0.312419	-0.543757	-0.774518	-0.401658	-1.24104	0.198934	0.198007	0.565672	0.303354	0.136813	0.472489	0.0118142	-0.687474	-0.697138	-0.312419	-0.543757	-0.774518	-0.401658	-1.24104	0.198934	0.198007	0.565672	0.303354	0.136813	0.472489	0.0118142
YGR276C	RNH70	-0.17714	-0.349414	-0.350024	-0.232906	-0.857553	-0.636529	-0.861631	0.852764	0.699894	0.671162	0.794921	0.447242	0.601956	0.269717	-0.17714	-0.349414	-0.350024	-0.232906	-0.857553	-0.636529	-0.861631	0.852764	0.699894	0.671162	0.794921	0.447242	0.601956	0.269717
YGR277C	CAB4	-0.898833	-0.853884	-0.645359	-1.26235	0.062419	0.0188452	-0.986668	0.377684	0.413103	0.569648	0.193326	0.952116	0.989269	0.260473	-0.898833	-0.853884	-0.645359	-1.26235	0.062419	0.0188452	-0.986668	0.377684	0.413103	0.569648	0.193326	0.952116	0.989269	0.260473
YGR279C	SCW4	-0.479526	-0.487468	-0.0148784	-0.416699	-0.240931	-0.334005	-0.504888	0.317458	0.320101	0.980523	0.383699	0.620819	0.509859	0.224769	-0.479526	-0.487468	-0.0148784	-0.416699	-0.240931	-0.334005	-0.504888	0.317458	0.320101	0.980523	0.383699	0.620819	0.509859	0.224769
YGR280C	PXR1	-0.171938	-0.85128	-0.585549	-1.01217	-0.214496	-0.441957	-1.04292	0.858236	0.296549	0.459618	0.247262	0.809087	0.615525	0.133448	-0.171938	-0.85128	-0.585549	-1.01217	-0.214496	-0.441957	-1.04292	0.858236	0.296549	0.459618	0.247262	0.809087	0.615525	0.133448
YGR281W	YOR1	-0.323488	0.120127	#NAME?	0.276782	1.44917	0.0224051	-0.468175	0.731579	0.876214	NA	0.704006	0.0329544	0.981708	0.439409	-0.323488	0.120127	-7.7628	0.276782	1.44917	0.0224051	-0.468175	0.731579	0.876214	0.0471138	0.704006	0.0329544	0.981708	0.439409
YGR282C	BGL2	-0.710374	0.536314	0.424311	0.308756	-0.443639	0.512742	-0.141398	0.00250918	0.0194548	0.0419399	0.144295	0.0377367	0.0187595	0.474572	-0.710374	0.536314	0.424311	0.308756	-0.443639	0.512742	-0.141398	0.00250918	0.0194548	0.0419399	0.144295	0.0377367	0.0187595	0.474572
YGR284C	ERV29	-0.292218	-0.218358	-1.99813	-1.27422	-0.384671	-1.48713	-2.60916	0.774343	0.859755	0.0441692	0.194926	0.676529	0.0974445	0.0269884	-0.292218	-0.218358	-1.99813	-1.27422	-0.384671	-1.48713	-2.60916	0.774343	0.859755	0.0441692	0.194926	0.676529	0.0974445	0.0269884
YGR285C	ZUO1	-0.34466	-0.67024	-0.426153	-0.642339	-0.0425701	-0.272816	-0.964941	0.198934	0.0175929	0.0922562	0.0184104	0.887851	0.310823	0.000533514	-0.34466	-0.67024	-0.426153	-0.642339	-0.0425701	-0.272816	-0.964941	0.198934	0.0175929	0.0922562	0.0184104	0.887851	0.310823	0.000533514
YGR286C	BIO2	0.188584	-0.535489	0.707934	0.0412104	-0.770098	-0.514931	-0.41951	0.842121	0.52583	0.352374	0.970165	0.326425	0.543852	0.609871	0.188584	-0.535489	0.707934	0.0412104	-0.770098	-0.514931	-0.41951	0.842121	0.52583	0.352374	0.970165	0.326425	0.543852	0.609871
YHL001W	RPL14B	0.331067	-0.527826	-0.647811	-0.355365	0.228356	-0.397739	-0.67326	0.35494	0.134188	0.0531653	0.307937	0.52986	0.256142	0.0317372	0.331067	-0.527826	-0.647811	-0.355365	0.228356	-0.397739	-0.67326	0.35494	0.134188	0.0531653	0.307937	0.52986	0.256142	0.0317372
YHL002W	HSE1	-0.377617	0.336481	-0.291491	0.321185	-0.469704	-0.0127392	0.0760715	0.632449	0.714094	0.726307	0.712598	0.566501	0.991887	0.923768	-0.377617	0.336481	-0.291491	0.321185	-0.469704	-0.0127392	0.0760715	0.632449	0.714094	0.726307	0.712598	0.566501	0.991887	0.923768
YHL004W	MRP4	-0.691421	-1.00083	1.04341	-0.373306	-1.0289	0.844116	-0.00370753	0.488317	0.309699	0.254506	0.754571	0.33516	0.386607	0.997281	-0.691421	-1.00083	1.04341	-0.373306	-1.0289	0.844116	-0.00370753	0.488317	0.309699	0.254506	0.754571	0.33516	0.386607	0.997281
YHL007C	STE20	-0.601175	-0.724504	-0.279776	-0.790928	-0.342453	-0.492677	-0.513596	0.335774	0.248448	0.666072	0.186313	0.589185	0.439577	0.349507	-0.601175	-0.724504	-0.279776	-0.790928	-0.342453	-0.492677	-0.513596	0.335774	0.248448	0.666072	0.186313	0.589185	0.439577	0.349507
YHL009C	YAP3	0.641174	-1.37207	-0.896038	-1.73064	-1.56471	-1.39264	-1.10844	0.536353	0.322363	0.350204	0.199046	0.250146	0.304744	0.250013	0.641174	-1.37207	-0.896038	-1.73064	-1.56471	-1.39264	-1.10844	0.536353	0.322363	0.350204	0.199046	0.250146	0.304744	0.250013
YHL011C	PRS3	0.0449956	-0.103385	-0.867076	-1.19377	-0.0314799	0.0781238	-0.902199	0.908017	0.782616	0.00594802	0.000899699	0.92848	0.838322	0.00288476	0.0449956	-0.103385	-0.867076	-1.19377	-0.0314799	0.0781238	-0.902199	0.908017	0.782616	0.00594802	0.000899699	0.92848	0.838322	0.00288476
YHL013C	OTU2	-1.1085	-0.844049	-0.909716	-0.758757	-0.025101	-0.960228	-1.08531	0.201839	0.342027	0.119762	0.202484	0.965861	0.113661	0.0742241	-1.1085	-0.844049	-0.909716	-0.758757	-0.025101	-0.960228	-1.08531	0.201839	0.342027	0.119762	0.202484	0.965861	0.113661	0.0742241
YHL015W	RPS20	0.183967	-0.19486	0.222456	0.201267	0.0335239	-0.0920872	-0.101506	0.342651	0.322205	0.221244	0.284309	0.877312	0.671774	0.56584	0.183967	-0.19486	0.222456	0.201267	0.0335239	-0.0920872	-0.101506	0.342651	0.322205	0.221244	0.284309	0.877312	0.671774	0.56584
YHL020C	OPI1	-2.20758	-2.0452	-2.57679	-1.84063	-1.62446	NA	-2.53329	0.00436968	0.00891287	0.0012294	0.0133409	0.0213703	NA	0.000880062	-2.20758	-2.0452	-2.57679	-1.84063	-1.62446	NA	-2.53329	0.00436968	0.00891287	0.0012294	0.0133409	0.0213703	NA	0.000880062
YHL021C	AIM17	-1.15681	0.182749	2.21079	1.08167	0.0326654	1.80026	1.58427	0.0012565	0.606848	1.78188e-06	0.00253619	0.928286	1.65738e-05	4.44651e-05	-1.15681	0.182749	2.21079	1.08167	0.0326654	1.80026	1.58427	0.0012565	0.606848	1.78188e-06	0.00253619	0.928286	1.65738e-05	4.44651e-05
YHL030W	ECM29	-1.79758	-0.790062	-1.65271	-1.99329	-0.114836	-0.772257	-2.3668	0.0929146	0.506507	0.213562	0.0615294	0.921239	0.517133	0.0616095	-1.79758	-0.790062	-1.65271	-1.99329	-0.114836	-0.772257	-2.3668	0.0929146	0.506507	0.213562	0.0615294	0.921239	0.517133	0.0616095
YHL031C	GOS1	0.230455	-0.618597	0.0182836	0.478021	0.292341	0.236381	-0.269731	0.879791	0.510325	0.986417	0.602135	0.834611	0.828413	0.829523	0.230455	-0.618597	0.0182836	0.478021	0.292341	0.236381	-0.269731	0.879791	0.510325	0.986417	0.602135	0.834611	0.828413	0.829523
YHL033C	RPL8A	0.233573	0.189745	-0.144326	-0.346129	0.270449	-0.380551	-0.323745	0.665561	0.736962	0.782681	0.488254	0.590445	0.456371	0.462882	0.233573	0.189745	-0.144326	-0.346129	0.270449	-0.380551	-0.323745	0.665561	0.736962	0.782681	0.488254	0.590445	0.456371	0.462882
YHL034C	SBP1	-0.713125	-1.13059	-0.38597	-0.471384	-0.0350345	-0.941572	-0.682914	0.115149	0.0184862	0.386027	0.294789	0.944276	0.0354821	0.0868915	-0.713125	-1.13059	-0.38597	-0.471384	-0.0350345	-0.941572	-0.682914	0.115149	0.0184862	0.386027	0.294789	0.944276	0.0354821	0.0868915
YHL039W	EFM1	0.40785	-0.323142	-0.672891	-0.518765	0.540148	-0.258327	-0.774561	0.592102	0.72136	0.509655	0.522776	0.454229	0.786806	0.391999	0.40785	-0.323142	-0.672891	-0.518765	0.540148	-0.258327	-0.774561	0.592102	0.72136	0.509655	0.522776	0.454229	0.786806	0.391999
YHR001W	OSH7	0.17681	-0.322091	0.729055	0.51403	0.0664728	-0.832357	0.0805075	0.816887	0.655702	0.238684	0.431868	0.92746	0.190464	0.905469	0.17681	-0.322091	0.729055	0.51403	0.0664728	-0.832357	0.0805075	0.816887	0.655702	0.238684	0.431868	0.92746	0.190464	0.905469
YHR001W-A	QCR10	#NAME?	#NAME?	#NAME?	0.0557644	-1.25603	2.18626	#NAME?	NA	NA	NA	0.981707	0.555412	0.175622	NA	-10.945	-10.5413	-11.1871	0.0557644	-1.25603	2.18626	-13.075	0.0339838	0.0154427	0.0296547	0.981707	0.555412	0.175622	0.0249797
YHR005C-A	TIM10	-0.821521	-0.987794	-0.444338	-0.77196	-0.927929	1.0502	-0.5845	0.234151	0.151227	0.521992	0.251572	0.163705	0.117636	0.337704	-0.821521	-0.987794	-0.444338	-0.77196	-0.927929	1.0502	-0.5845	0.234151	0.151227	0.521992	0.251572	0.163705	0.117636	0.337704
YHR007C	ERG11	0.792289	-0.697832	-2.12343	-1.88874	-0.249801	-0.69501	-2.27105	0.289287	0.365201	0.00481234	0.0135919	0.76061	0.355325	0.00185975	0.792289	-0.697832	-2.12343	-1.88874	-0.249801	-0.69501	-2.27105	0.289287	0.365201	0.00481234	0.0135919	0.76061	0.355325	0.00185975
YHR008C	SOD2	-0.662748	-0.381583	1.17829	-0.0582544	-1.00723	1.53719	0.701777	0.0131668	0.147359	0.00013822	0.854428	0.000698724	8.96544e-06	0.00478638	-0.662748	-0.381583	1.17829	-0.0582544	-1.00723	1.53719	0.701777	0.0131668	0.147359	0.00013822	0.854428	0.000698724	8.96544e-06	0.00478638
YHR009C	TDA3	-1.60389	-1.21933	-0.441713	-0.636192	-0.569592	-0.459803	-0.675494	0.00783662	0.0242357	0.376311	0.202507	0.26253	0.378977	0.132589	-1.60389	-1.21933	-0.441713	-0.636192	-0.569592	-0.459803	-0.675494	0.00783662	0.0242357	0.376311	0.202507	0.26253	0.378977	0.132589
YHR010W	RPL27A	1.01413	-0.449909	0.438926	0.715328	0.491016	0.248409	0.821231	0.0156373	0.289767	0.267112	0.0754655	0.230992	0.580049	0.026514	1.01413	-0.449909	0.438926	0.715328	0.491016	0.248409	0.821231	0.0156373	0.289767	0.267112	0.0754655	0.230992	0.580049	0.026514
YHR012W	VPS29	-1.09373	-0.929659	-0.808244	-1.29324	0.0896476	0.422237	-0.666022	0.153084	0.231055	0.326402	0.082972	0.919913	0.617791	0.325843	-1.09373	-0.929659	-0.808244	-1.29324	0.0896476	0.422237	-0.666022	0.153084	0.231055	0.326402	0.082972	0.919913	0.617791	0.325843
YHR013C	ARD1	-0.902953	-1.23162	-1.20437	-1.05652	-1.47142	-1.25505	-2.23391	0.126686	0.0441334	0.0343381	0.0677354	0.0130848	0.0317022	0.000379009	-0.902953	-1.23162	-1.20437	-1.05652	-1.47142	-1.25505	-2.23391	0.126686	0.0441334	0.0343381	0.0677354	0.0130848	0.0317022	0.000379009
YHR016C	YSC84	#NAME?	-1.35828	0.644505	-0.553641	#NAME?	-0.271356	-0.747713	NA	0.355289	0.516586	0.63114	NA	0.837292	0.448702	-11.0346	-1.35828	0.644505	-0.553641	-9.99216	-0.271356	-0.747713	0.0329684	0.355289	0.516586	0.63114	0.0137757	0.837292	0.448702
YHR018C	ARG4	-0.631973	0.252403	-0.291284	2.60066	1.77181	-0.717132	0.717133	0.119611	0.570866	0.477267	6.69421e-06	0.000239977	0.0722859	0.0468761	-0.631973	0.252403	-0.291284	2.60066	1.77181	-0.717132	0.717133	0.119611	0.570866	0.477267	6.69421e-06	0.000239977	0.0722859	0.0468761
YHR019C	DED81	-0.356455	-0.344644	-1.02142	-0.137653	0.0317947	-0.636282	-0.917636	0.155675	0.173704	0.000317598	0.600733	0.914113	0.0118444	0.000472492	-0.356455	-0.344644	-1.02142	-0.137653	0.0317947	-0.636282	-0.917636	0.155675	0.173704	0.000317598	0.600733	0.914113	0.0118444	0.000472492
YHR020W	YHR020W	0.178132	-0.162094	-0.853496	-0.0934795	0.451725	-0.226785	-0.814099	0.389752	0.446645	0.000229171	0.667092	0.0234212	0.260251	0.000231053	0.178132	-0.162094	-0.853496	-0.0934795	0.451725	-0.226785	-0.814099	0.389752	0.446645	0.000229171	0.667092	0.0234212	0.260251	0.000231053
YHR023W	MYO1	0.268458	-0.24269	1.13333	0.229688	0.119553	0.771396	0.364995	0.763165	0.775046	0.127809	0.775314	0.881494	0.283584	0.581747	0.268458	-0.24269	1.13333	0.229688	0.119553	0.771396	0.364995	0.763165	0.775046	0.127809	0.775314	0.881494	0.283584	0.581747
YHR024C	MAS2	-2.19561	-1.59448	-1.32622	-0.914988	-2.36381	-0.875003	-1.04304	0.000269293	0.00430721	0.00784684	0.0601137	0.000116448	0.0720681	0.0208316	-2.19561	-1.59448	-1.32622	-0.914988	-2.36381	-0.875003	-1.04304	0.000269293	0.00430721	0.00784684	0.0601137	0.000116448	0.0720681	0.0208316
YHR025W	THR1	-0.0150327	-0.469724	-1.06957	0.235096	0.553369	-0.118927	-0.765693	0.955316	0.0190762	1.60134e-05	0.204593	0.00502509	0.56444	0.000233105	-0.0150327	-0.469724	-1.06957	0.235096	0.553369	-0.118927	-0.765693	0.955316	0.0190762	1.60134e-05	0.204593	0.00502509	0.56444	0.000233105
YHR027C	RPN1	-0.294337	-0.486147	-0.947986	-0.9775	-0.519867	-0.0349159	-1.34136	0.300999	0.0888302	0.00147792	0.00195563	0.0572429	0.925619	5.53203e-05	-0.294337	-0.486147	-0.947986	-0.9775	-0.519867	-0.0349159	-1.34136	0.300999	0.0888302	0.00147792	0.00195563	0.0572429	0.925619	5.53203e-05
YHR028C	DAP2	-1.18801	-0.423684	0.23715	-0.84154	-0.28127	-0.247328	-1.12541	0.0285609	0.457457	0.676795	0.110685	0.612188	0.688729	0.0213691	-1.18801	-0.423684	0.23715	-0.84154	-0.28127	-0.247328	-1.12541	0.0285609	0.457457	0.676795	0.110685	0.612188	0.688729	0.0213691
YHR029C	YHI9	-0.466068	0.368966	-0.437321	2.36791	1.58932	-0.36231	0.884808	0.385711	0.510565	0.393975	0.000262819	0.0037804	0.518919	0.0553511	-0.466068	0.368966	-0.437321	2.36791	1.58932	-0.36231	0.884808	0.385711	0.510565	0.393975	0.000262819	0.0037804	0.518919	0.0553511
YHR030C	SLT2	-0.382051	1.45646	-0.0982629	-1.01663	0.204648	0.849275	0.295692	0.67237	0.0848329	0.918526	0.356786	0.824381	0.303488	0.706561	-0.382051	1.45646	-0.0982629	-1.01663	0.204648	0.849275	0.295692	0.67237	0.0848329	0.918526	0.356786	0.824381	0.303488	0.706561
YHR034C	PIH1	-1.33947	-1.65407	-1.26609	-1.2708	-2.25265	-1.64713	-1.95078	0.287267	0.292614	0.287515	0.302018	0.145425	0.154186	0.0883911	-1.33947	-1.65407	-1.26609	-1.2708	-2.25265	-1.64713	-1.95078	0.287267	0.292614	0.287515	0.302018	0.145425	0.154186	0.0883911
YHR037W	PUT2	-1.22851	-1.11776	0.436756	-0.815567	0.114815	0.605198	-0.263442	0.00456267	0.0109797	0.267602	0.0446691	0.802068	0.13411	0.479897	-1.22851	-1.11776	0.436756	-0.815567	0.114815	0.605198	-0.263442	0.00456267	0.0109797	0.267602	0.0446691	0.802068	0.13411	0.479897
YHR038W	RRF1	-0.243321	0.243934	0.873043	#NAME?	-0.043034	0.660449	0.748952	0.735166	0.706869	0.114994	NA	0.957626	0.247812	0.183142	-0.243321	0.243934	0.873043	-9.80637	-0.043034	0.660449	0.748952	0.735166	0.706869	0.114994	0.0142913	0.957626	0.247812	0.183142
YHR039C	MSC7	-0.0694649	0.225629	-0.781941	-0.496577	0.973311	-0.0513143	-0.198784	0.908017	0.718002	0.0910732	0.363312	0.0426022	0.935266	0.665686	-0.0694649	0.225629	-0.781941	-0.496577	0.973311	-0.0513143	-0.198784	0.908017	0.718002	0.0910732	0.363312	0.0426022	0.935266	0.665686
YHR039C-A	VMA10	-0.444989	-0.240011	0.386432	0.112602	-0.680019	-0.662779	-0.763854	0.0571575	0.323168	0.0828212	0.655926	0.00531571	0.00614935	0.0012683	-0.444989	-0.240011	0.386432	0.112602	-0.680019	-0.662779	-0.763854	0.0571575	0.323168	0.0828212	0.655926	0.00531571	0.00614935	0.0012683
YHR041C	SRB2	-2.21398	-1.3642	-1.25906	-1.59643	-1.41194	-1.08158	-2.00278	0.0116633	0.0434901	0.0413023	0.0112395	0.0281987	0.0832373	0.00144905	-2.21398	-1.3642	-1.25906	-1.59643	-1.41194	-1.08158	-2.00278	0.0116633	0.0434901	0.0413023	0.0112395	0.0281987	0.0832373	0.00144905
YHR042W	NCP1	-0.694138	-0.369551	-0.633315	-1.11583	-0.392441	-0.372593	-0.946339	0.0132529	0.183261	0.0188605	0.000598036	0.144022	0.168217	0.000805587	-0.694138	-0.369551	-0.633315	-1.11583	-0.392441	-0.372593	-0.946339	0.0132529	0.183261	0.0188605	0.000598036	0.144022	0.168217	0.000805587
YHR046C	INM1	-0.0246934	-0.0661297	-0.531728	-0.327005	1.24989	0.567182	0.331933	0.979024	0.94414	0.548308	0.634729	0.0572429	0.397625	0.583461	-0.0246934	-0.0661297	-0.531728	-0.327005	1.24989	0.567182	0.331933	0.979024	0.94414	0.548308	0.634729	0.0572429	0.397625	0.583461
YHR047C	AAP1	0.439778	0.276097	-1.42431	0.0348963	0.860539	0.373785	-0.646235	0.448785	0.654894	0.0196357	0.965062	0.109788	0.529626	0.183047	0.439778	0.276097	-1.42431	0.0348963	0.860539	0.373785	-0.646235	0.448785	0.654894	0.0196357	0.965062	0.109788	0.529626	0.183047
YHR049W	FSH1	-0.327949	-0.87655	-1.18868	-1.16723	-1.20454	-1.24441	-0.954627	0.281509	0.00744587	0.000416446	0.000806976	0.000509121	0.000313938	0.00149287	-0.327949	-0.87655	-1.18868	-1.16723	-1.20454	-1.24441	-0.954627	0.281509	0.00744587	0.000416446	0.000806976	0.000509121	0.000313938	0.00149287
YHR051W	COX6	-1.10786	-1.23785	0.752105	0.463248	-0.835925	2.47016	1.2884	0.0054384	0.0036374	0.0388639	0.212371	0.0257401	2.84836e-06	0.000912563	-1.10786	-1.23785	0.752105	0.463248	-0.835925	2.47016	1.2884	0.0054384	0.0036374	0.0388639	0.212371	0.0257401	2.84836e-06	0.000912563
YHR052W	CIC1	-0.311892	-0.489093	-0.99005	-1.12251	-0.0353017	-0.873866	-1.19725	0.466501	0.237423	0.0134731	0.00846046	0.936729	0.0293413	0.00246525	-0.311892	-0.489093	-0.99005	-1.12251	-0.0353017	-0.873866	-1.19725	0.466501	0.237423	0.0134731	0.00846046	0.936729	0.0293413	0.00246525
YHR057C	CPR2	-0.96727	-1.38282	-0.434854	-1.99139	-1.79331	-0.449226	-1.67382	0.311018	0.0788434	0.530779	0.0270646	0.0711447	0.580169	0.0602058	-0.96727	-1.38282	-0.434854	-1.99139	-1.79331	-0.449226	-1.67382	0.311018	0.0788434	0.530779	0.0270646	0.0711447	0.580169	0.0602058
YHR060W	VMA22	-1.09438	-1.20089	-0.745234	-0.40311	-0.806433	-1.54002	-1.15108	0.0748582	0.0597691	0.20651	0.525189	0.184564	0.0133589	0.0368823	-1.09438	-1.20089	-0.745234	-0.40311	-0.806433	-1.54002	-1.15108	0.0748582	0.0597691	0.20651	0.525189	0.184564	0.0133589	0.0368823
YHR063C	PAN5	-0.987686	-0.34491	-0.613163	-0.174535	-0.541291	-0.61702	-0.940686	0.0409414	0.506507	0.184177	0.748001	0.262177	0.196791	0.0303473	-0.987686	-0.34491	-0.613163	-0.174535	-0.541291	-0.61702	-0.940686	0.0409414	0.506507	0.184177	0.748001	0.262177	0.196791	0.0303473
YHR064C	SSZ1	-0.178091	-0.329627	-0.27647	-0.334675	-0.42383	-0.13499	-0.588319	0.241017	0.0361823	0.0541013	0.0268913	0.00610795	0.379277	0.000289026	-0.178091	-0.329627	-0.27647	-0.334675	-0.42383	-0.13499	-0.588319	0.241017	0.0361823	0.0541013	0.0268913	0.00610795	0.379277	0.000289026
YHR065C	RRP3	0.103216	-0.148549	-0.824704	-0.367912	0.573697	-0.576223	-1.01417	0.860159	0.80046	0.0710035	0.452039	0.230101	0.226883	0.0203365	0.103216	-0.148549	-0.824704	-0.367912	0.573697	-0.576223	-1.01417	0.860159	0.80046	0.0710035	0.452039	0.230101	0.226883	0.0203365
YHR066W	SSF1	-0.572428	-0.551052	-0.285462	-0.867157	0.649941	-0.789818	-1.1989	0.646699	0.576156	0.818352	0.348992	0.431044	0.402532	0.147563	-0.572428	-0.551052	-0.285462	-0.867157	0.649941	-0.789818	-1.1989	0.646699	0.576156	0.818352	0.348992	0.431044	0.402532	0.147563
YHR068W	DYS1	-0.125275	-0.22806	-0.872805	-0.538526	-0.0357312	-0.292524	-0.576395	0.549091	0.252225	0.000144576	0.00855091	0.872673	0.127107	0.00244703	-0.125275	-0.22806	-0.872805	-0.538526	-0.0357312	-0.292524	-0.576395	0.549091	0.252225	0.000144576	0.00855091	0.872673	0.127107	0.00244703
YHR069C	RRP4	-0.590115	-0.847681	-1.20723	-1.56091	-0.0898536	-0.417596	-0.999153	0.354632	0.179772	0.043412	0.015095	0.900679	0.534759	0.0691522	-0.590115	-0.847681	-1.20723	-1.56091	-0.0898536	-0.417596	-0.999153	0.354632	0.179772	0.043412	0.015095	0.900679	0.534759	0.0691522
YHR070W	TRM5	-0.20647	-0.145439	-1.19253	-0.647248	0.459919	-0.148029	-1.13132	0.80275	0.872427	0.0755174	0.365005	0.530788	0.86574	0.0696185	-0.20647	-0.145439	-1.19253	-0.647248	0.459919	-0.148029	-1.13132	0.80275	0.872427	0.0755174	0.365005	0.530788	0.86574	0.0696185
YHR072W-A	NOP10	-0.0228381	-0.330765	-0.0848965	-0.19076	-0.303302	-0.374565	-0.188808	0.972726	0.527835	0.875654	0.722213	0.545757	0.461259	0.683708	-0.0228381	-0.330765	-0.0848965	-0.19076	-0.303302	-0.374565	-0.188808	0.972726	0.527835	0.875654	0.722213	0.545757	0.461259	0.683708
YHR073W	OSH3	-0.00957835	0.829171	-0.418553	-0.551045	-0.368913	-0.249991	0.59885	0.993209	0.269979	0.576422	0.460845	0.626284	0.804322	0.361805	-0.00957835	0.829171	-0.418553	-0.551045	-0.368913	-0.249991	0.59885	0.993209	0.269979	0.576422	0.460845	0.626284	0.804322	0.361805
YHR074W	QNS1	-0.0718359	0.334868	-1.67872	-1.0882	0.514293	-0.119016	-1.99216	0.914604	0.558135	0.00209515	0.0365126	0.324894	0.855078	0.000350789	-0.0718359	0.334868	-1.67872	-1.0882	0.514293	-0.119016	-1.99216	0.914604	0.558135	0.00209515	0.0365126	0.324894	0.855078	0.000350789
YHR076W	PTC7	-1.38869	-1.08859	-0.574792	-0.945998	-1.47649	0.679886	-1.17699	0.0335798	0.0992935	0.367965	0.136653	0.0227185	0.303488	0.0429657	-1.38869	-1.08859	-0.574792	-0.945998	-1.47649	0.679886	-1.17699	0.0335798	0.0992935	0.367965	0.136653	0.0227185	0.303488	0.0429657
YHR081W	LRP1	-0.881676	-1.69179	-1.63764	-1.47356	-0.686321	-1.68059	-1.42236	0.284217	0.0696358	0.0394979	0.0684537	0.403194	0.0585528	0.0512975	-0.881676	-1.69179	-1.63764	-1.47356	-0.686321	-1.68059	-1.42236	0.284217	0.0696358	0.0394979	0.0684537	0.403194	0.0585528	0.0512975
YHR082C	KSP1	#NAME?	-1.17592	#NAME?	#NAME?	-0.994673	0.376213	0.757848	NA	0.531865	NA	NA	0.542966	0.858775	0.706561	-10.0739	-1.17592	-10.316	-8.69168	-0.994673	0.376213	0.757848	0.0352105	0.531865	0.0327455	0.0444377	0.542966	0.858775	0.706561
YHR084W	STE12	0.498839	0.262176	0.308995	-0.252137	0.180685	0.403571	0.0922228	0.474356	0.728224	0.612073	0.791033	0.844857	0.575581	0.877945	0.498839	0.262176	0.308995	-0.252137	0.180685	0.403571	0.0922228	0.474356	0.728224	0.612073	0.791033	0.844857	0.575581	0.877945
YHR085W	IPI1	#NAME?	-0.0278199	#NAME?	0.159711	0.456023	#NAME?	1.09828	NA	0.969641	NA	0.754571	0.31646	NA	0.0781074	-8.53632	-0.0278199	-8.77839	0.159711	0.456023	-6.79429	1.09828	0.0112358	0.969641	0.0442434	0.754571	0.31646	0.0110471	0.0781074
YHR086W	NAM8	#NAME?	-0.548536	-0.274788	-0.478575	#NAME?	0.112145	0.0464805	NA	0.700274	0.837763	0.778973	NA	0.944234	0.970957	-9.98569	-0.548536	-0.274788	-0.478575	-8.94322	0.112145	0.0464805	0.0318292	0.700274	0.837763	0.778973	0.0435118	0.944234	0.970957
YHR087W	RTC3	-3.81186	-0.768529	2.66336	-0.527252	-2.49341	1.01697	2.15394	3.24639e-08	0.0552007	1.78188e-06	0.163152	5.87005e-06	0.00998502	1.43551e-05	-3.81186	-0.768529	2.66336	-0.527252	-2.49341	1.01697	2.15394	3.24639e-08	0.0552007	1.78188e-06	0.163152	5.87005e-06	0.00998502	1.43551e-05
YHR088W	RPF1	-0.870739	0.332863	-1.11933	-0.843251	0.0725495	-1.30596	-1.38602	0.115266	0.579884	0.0362431	0.16178	0.910908	0.0191612	0.0080024	-0.870739	0.332863	-1.11933	-0.843251	0.0725495	-1.30596	-1.38602	0.115266	0.579884	0.0362431	0.16178	0.910908	0.0191612	0.0080024
YHR089C	GAR1	-0.00391343	-0.475689	-0.39544	-0.890425	0.0772488	-0.365492	-1.14887	0.995555	0.284667	0.345623	0.0385218	0.875798	0.409851	0.00504525	-0.00391343	-0.475689	-0.39544	-0.890425	0.0772488	-0.365492	-1.14887	0.995555	0.284667	0.345623	0.0385218	0.875798	0.409851	0.00504525
YHR094C	HXT1	-0.0237981	-0.716831	-1.64444	-0.468118	1.11057	-0.601605	-1.64288	0.98528	0.498375	0.119227	0.659157	0.260377	0.577612	0.0606773	-0.0237981	-0.716831	-1.64444	-0.468118	1.11057	-0.601605	-1.64288	0.98528	0.498375	0.119227	0.659157	0.260377	0.577612	0.0606773
YHR097C	YHR097C	#NAME?	-1.77785	-0.181274	-2.48241	-1.31822	#NAME?	-1.62537	NA	0.164303	0.879767	0.0391089	0.397739	NA	0.139009	-11.4138	-1.77785	-0.181274	-2.48241	-1.31822	-9.67176	-1.62537	0.0408083	0.164303	0.879767	0.0391089	0.397739	0.0221003	0.139009
YHR098C	SFB3	-0.179952	-0.763375	-1.2305	-1.63055	-0.772541	-0.58334	-1.35772	0.80166	0.215332	0.0344284	0.0100393	0.194366	0.341113	0.0146314	-0.179952	-0.763375	-1.2305	-1.63055	-0.772541	-0.58334	-1.35772	0.80166	0.215332	0.0344284	0.0100393	0.194366	0.341113	0.0146314
YHR099W	TRA1	-1.34833	0.643216	-0.463845	-1.09249	-1.6903	#NAME?	0.021178	0.378616	0.760653	0.758185	0.464291	0.377562	NA	0.99194	-1.34833	0.643216	-0.463845	-1.09249	-1.6903	-8.65941	0.021178	0.378616	0.760653	0.758185	0.464291	0.377562	0.0167093	0.99194
YHR100C	GEP4	-0.740473	-0.523631	-0.773459	#NAME?	-1.00973	0.950979	-0.90627	0.502301	0.572769	0.355043	NA	0.203753	0.232129	0.23643	-0.740473	-0.523631	-0.773459	-8.96639	-1.00973	0.950979	-0.90627	0.502301	0.572769	0.355043	0.0334907	0.203753	0.232129	0.23643
YHR103W	SBE22	-0.589234	-1.02105	-0.817213	-0.784553	-1.00596	-0.907542	-0.672383	0.204276	0.0159509	0.0201527	0.0288871	0.00751319	0.0209182	0.0329115	-0.589234	-1.02105	-0.817213	-0.784553	-1.00596	-0.907542	-0.672383	0.204276	0.0159509	0.0201527	0.0288871	0.00751319	0.0209182	0.0329115
YHR104W	GRE3	-1.42687	-0.582686	0.969117	-0.340207	-0.696394	0.319229	-0.154416	6.20699e-06	0.0151453	0.000204864	0.121337	0.00343646	0.150271	0.44787	-1.42687	-0.582686	0.969117	-0.340207	-0.696394	0.319229	-0.154416	6.20699e-06	0.0151453	0.000204864	0.121337	0.00343646	0.150271	0.44787
YHR106W	TRR2	-0.805802	-0.746219	-1.27337	-0.707047	-0.796087	-0.385173	-0.929774	0.30765	0.355944	0.0881198	0.367368	0.450629	0.662216	0.175774	-0.805802	-0.746219	-1.27337	-0.707047	-0.796087	-0.385173	-0.929774	0.30765	0.355944	0.0881198	0.367368	0.450629	0.662216	0.175774
YHR107C	CDC12	-0.0871465	0.177608	-0.371593	-0.43034	0.0565674	-0.6209	-1.00632	0.789566	0.558647	0.16186	0.114247	0.859339	0.0250766	0.000545468	-0.0871465	0.177608	-0.371593	-0.43034	0.0565674	-0.6209	-1.00632	0.789566	0.558647	0.16186	0.114247	0.859339	0.0250766	0.000545468
YHR108W	GGA2	-0.774007	-1.0744	-0.752117	-0.752597	-0.4903	-0.92889	-1.38611	0.0215948	0.00393025	0.0208527	0.0248979	0.130932	0.00652089	0.000179817	-0.774007	-1.0744	-0.752117	-0.752597	-0.4903	-0.92889	-1.38611	0.0215948	0.00393025	0.0208527	0.0248979	0.130932	0.00652089	0.000179817
YHR111W	UBA4	-0.119617	-0.668831	-1.20549	-0.974613	-0.0861678	0.781726	-1.415	0.858096	0.237423	0.0452383	0.110377	0.889908	0.153033	0.015237	-0.119617	-0.668831	-1.20549	-0.974613	-0.0861678	0.781726	-1.415	0.858096	0.237423	0.0452383	0.110377	0.889908	0.153033	0.015237
YHR112C	YHR112C	0.254125	-0.323002	0.727014	#NAME?	0.698744	-0.200739	0.152779	0.807643	0.73128	0.365424	NA	0.40169	0.841087	0.86895	0.254125	-0.323002	0.727014	-7.17574	0.698744	-0.200739	0.152779	0.807643	0.73128	0.365424	0.0348321	0.40169	0.841087	0.86895
YHR113W	APE4	-1.37094	-0.87581	-0.11865	-0.204451	-1.0566	-1.21827	-1.33153	0.000945784	0.0234875	0.762439	0.595966	0.0054368	0.00193706	0.00052935	-1.37094	-0.87581	-0.11865	-0.204451	-1.0566	-1.21827	-1.33153	0.000945784	0.0234875	0.762439	0.595966	0.0054368	0.00193706	0.00052935
YHR114W	BZZ1	-1.00154	-0.909754	-0.481522	-0.102145	-1.02103	0.434256	-0.60032	0.0820147	0.119459	0.397707	0.888176	0.0697489	0.476342	0.239238	-1.00154	-0.909754	-0.481522	-0.102145	-1.02103	0.434256	-0.60032	0.0820147	0.119459	0.397707	0.888176	0.0697489	0.476342	0.239238
YHR115C	DMA1	#NAME?	0.555664	0.0922191	0.317865	#NAME?	0.52998	#NAME?	NA	0.392594	0.867584	0.574783	NA	0.400557	NA	-13.591	0.555664	0.0922191	0.317865	-12.5485	0.52998	-15.7209	0.0234199	0.392594	0.867584	0.574783	0.0422934	0.400557	0.0274578
YHR116W	COX23	#NAME?	#NAME?	#NAME?	#NAME?	#NAME?	0.614789	#NAME?	NA	NA	NA	NA	NA	0.144862	NA	-7.97192	-7.56819	-8.214	-6.5897	-6.92945	0.614789	-10.1019	0.0140738	0.0149516	0.018956	0.0359795	0.0488967	0.144862	0.0377692
YHR117W	TOM71	-0.971124	-0.456375	-0.657112	-0.514674	-0.923924	-0.273406	-1.20392	0.032043	0.328676	0.125265	0.248101	0.0369459	0.578046	0.00501575	-0.971124	-0.456375	-0.657112	-0.514674	-0.923924	-0.273406	-1.20392	0.032043	0.328676	0.125265	0.248101	0.0369459	0.578046	0.00501575
YHR121W	LSM12	-0.890791	-0.179004	-0.637221	0.00804199	-0.43983	-1.15525	-0.347048	0.238844	0.849599	0.384624	0.992651	0.568143	0.115456	0.621076	-0.890791	-0.179004	-0.637221	0.00804199	-0.43983	-1.15525	-0.347048	0.238844	0.849599	0.384624	0.992651	0.568143	0.115456	0.621076
YHR122W	CIA2	#NAME?	#NAME?	-1.06572	#NAME?	#NAME?	-0.564678	#NAME?	NA	NA	0.532572	NA	NA	0.726392	NA	-10.709	-10.3053	-1.06572	-9.32681	-9.66656	-0.564678	-12.839	0.037736	0.0202508	0.532572	0.0467197	0.0394231	0.726392	0.01464
YHR127W	YHR127W	-2.35342	-1.95868	-1.9518	-1.37681	-1.59246	-2.07763	-2.29974	0.020522	0.039609	0.0269757	0.115537	0.0694824	0.0346904	0.00769117	-2.35342	-1.95868	-1.9518	-1.37681	-1.59246	-2.07763	-2.29974	0.020522	0.039609	0.0269757	0.115537	0.0694824	0.0346904	0.00769117
YHR128W	FUR1	-0.0331792	-0.600665	-0.422795	-0.379861	0.274288	-0.375589	-0.906497	0.890338	0.00517879	0.0250127	0.0473442	0.147484	0.0493447	6.6138e-05	-0.0331792	-0.600665	-0.422795	-0.379861	0.274288	-0.375589	-0.906497	0.890338	0.00517879	0.0250127	0.0473442	0.147484	0.0493447	6.6138e-05
YHR132C	ECM14	-0.821378	-0.414626	-0.231763	-0.392461	-0.174731	0.244346	-0.899916	0.063619	0.371442	0.615897	0.383433	0.713382	0.622417	0.0248436	-0.821378	-0.414626	-0.231763	-0.392461	-0.174731	0.244346	-0.899916	0.063619	0.371442	0.615897	0.383433	0.713382	0.622417	0.0248436
YHR132W-A	IGO2	-1.11451	-1.21855	-0.738355	-0.662127	-1.07518	0.666492	0.851364	0.234151	0.197623	0.415726	0.428388	0.24323	0.434402	0.241515	-1.11451	-1.21855	-0.738355	-0.662127	-1.07518	0.666492	0.851364	0.234151	0.197623	0.415726	0.428388	0.24323	0.434402	0.241515
YHR133C	NSG1	Inf	NA	NA	Inf	NA	NA	NA	NA	NA	NA	NA	NA	NA	NA	7.52642	NA	NA	8.71103	NA	NA	NA	0.0475696	NA	NA	0.0400342	NA	NA	NA
YHR135C	YCK1	-1.14444	-1.09435	-1.22546	-0.950179	0.413845	-0.960012	-1.00403	0.354337	0.32845	0.291702	0.384789	0.720135	0.386325	0.352163	-1.14444	-1.09435	-1.22546	-0.950179	0.413845	-0.960012	-1.00403	0.354337	0.32845	0.291702	0.384789	0.720135	0.386325	0.352163
YHR138C	YHR138C	0.0370851	0.0316849	2.1627	0.164064	0.290593	1.71072	1.24399	0.975609	0.970598	0.00283895	0.82754	0.666461	0.013006	0.0529329	0.0370851	0.0316849	2.1627	0.164064	0.290593	1.71072	1.24399	0.975609	0.970598	0.00283895	0.82754	0.666461	0.013006	0.0529329
YHR143W-A	RPC10	-0.235696	-0.333708	-0.193271	-0.224636	0.341316	-0.138094	-0.435387	0.685207	0.558647	0.724882	0.692566	0.528501	0.833233	0.351004	-0.235696	-0.333708	-0.193271	-0.224636	0.341316	-0.138094	-0.435387	0.685207	0.558647	0.724882	0.692566	0.528501	0.833233	0.351004
YHR144C	DCD1	0.388765	-0.653861	#NAME?	#NAME?	0.350131	#NAME?	#NAME?	0.765799	0.693124	NA	NA	0.821375	NA	NA	0.388765	-0.653861	-7.62809	-6.00379	0.350131	-5.64398	-9.51595	0.765799	0.693124	0.0278157	0.0200212	0.821375	0.0251086	0.0118512
YHR146W	CRP1	-0.495695	-0.292309	-0.157535	-0.0610944	-0.581237	-0.138103	-0.42576	0.078618	0.320277	0.59242	0.85933	0.0369459	0.671321	0.0883037	-0.495695	-0.292309	-0.157535	-0.0610944	-0.581237	-0.138103	-0.42576	0.078618	0.320277	0.59242	0.85933	0.0369459	0.671321	0.0883037
YHR148W	IMP3	-0.282851	-1.61298	-0.924825	-0.925908	-0.537571	-0.0829764	-0.830376	0.632777	0.00671509	0.0734005	0.0810901	0.32274	0.907837	0.0818856	-0.282851	-1.61298	-0.924825	-0.925908	-0.537571	-0.0829764	-0.830376	0.632777	0.00671509	0.0734005	0.0810901	0.32274	0.907837	0.0818856
YHR149C	SKG6	Inf	NA	NA	NA	NA	Inf	NA	NA	NA	NA	NA	NA	NA	NA	6.41618	NA	NA	NA	NA	6.79525	NA	0.0446325	NA	NA	NA	NA	0.0480046	NA
YHR158C	KEL1	-2.21383	-1.06552	-0.665589	-1.26501	-1.72825	0.109011	-0.932322	0.00109037	0.0836072	0.251853	0.0356932	0.00558606	0.888889	0.0789832	-2.21383	-1.06552	-0.665589	-1.26501	-1.72825	0.109011	-0.932322	0.00109037	0.0836072	0.251853	0.0356932	0.00558606	0.888889	0.0789832
YHR163W	SOL3	-0.797455	-0.450977	-0.369218	-0.401891	-0.393729	-0.839367	-0.338514	0.00207137	0.0651939	0.102065	0.0835766	0.0886927	0.00120141	0.104681	-0.797455	-0.450977	-0.369218	-0.401891	-0.393729	-0.839367	-0.338514	0.00207137	0.0651939	0.102065	0.0835766	0.0886927	0.00120141	0.104681
YHR167W	THP2	#NAME?	#NAME?	#NAME?	1.0507	#NAME?	0.946929	#NAME?	NA	NA	NA	0.428324	NA	0.556208	NA	-9.89795	-9.49422	-10.14	1.0507	-8.85548	0.946929	-12.0279	0.0154049	0.0105507	0.0167249	0.428324	0.0366058	0.556208	0.0374548
YHR169W	DBP8	-0.101355	0.359228	0.0133915	0.274032	1.01572	-1.88975	0.280292	0.968589	0.870679	0.992956	0.898959	0.569216	0.27781	0.87538	-0.101355	0.359228	0.0133915	0.274032	1.01572	-1.88975	0.280292	0.968589	0.870679	0.992956	0.898959	0.569216	0.27781	0.87538
YHR170W	NMD3	0.349839	-0.266537	-1.34614	-0.56541	0.343022	-0.227448	-1.36349	0.461915	0.587384	0.00359615	0.19724	0.452084	0.65639	0.00203248	0.349839	-0.266537	-1.34614	-0.56541	0.343022	-0.227448	-1.36349	0.461915	0.587384	0.00359615	0.19724	0.452084	0.65639	0.00203248
YHR174W	ENO2	0.0783912	0.456671	-0.415398	-0.614188	0.183564	0.302586	0.270871	0.849275	0.181099	0.196572	0.0635208	0.5991	0.379987	0.370241	0.0783912	0.456671	-0.415398	-0.614188	0.183564	0.302586	0.270871	0.849275	0.181099	0.196572	0.0635208	0.5991	0.379987	0.370241
YHR179W	OYE2	0.357546	0.588205	-0.353976	-0.404285	0.361048	1.53797	0.545093	0.0530426	0.00449529	0.046303	0.029695	0.0466871	1.73422e-07	0.00258592	0.357546	0.588205	-0.353976	-0.404285	0.361048	1.53797	0.545093	0.0530426	0.00449529	0.046303	0.029695	0.0466871	1.73422e-07	0.00258592
YHR183W	GND1	-0.143524	-0.131946	-1.141	-0.792111	0.207699	-0.049401	-0.805059	0.481873	0.528287	1.00493e-05	0.000597349	0.280216	0.835942	0.000184818	-0.143524	-0.131946	-1.141	-0.792111	0.207699	-0.049401	-0.805059	0.481873	0.528287	1.00493e-05	0.000597349	0.280216	0.835942	0.000184818
YHR186C	KOG1	-0.647618	-0.449738	-0.148834	-0.00731561	-0.546659	0.641775	-0.429905	0.310646	0.498605	0.80107	0.992142	0.38892	0.312543	0.442421	-0.647618	-0.449738	-0.148834	-0.00731561	-0.546659	0.641775	-0.429905	0.310646	0.498605	0.80107	0.992142	0.38892	0.312543	0.442421
YHR187W	IKI1	#NAME?	0.125401	0.0664764	#NAME?	0.124467	0.245899	#NAME?	NA	0.823051	0.898957	NA	0.739457	0.644236	NA	-10.056	0.125401	0.0664764	-8.67382	0.124467	0.245899	-12.186	0.0436248	0.823051	0.898957	0.0162987	0.739457	0.644236	0.0312066
YHR188C	GPI16	#NAME?	0.281021	-0.0781074	#NAME?	-0.36308	-0.352109	-0.561698	NA	0.75714	0.933293	NA	0.652887	0.689342	0.422511	-11.6502	0.281021	-0.0781074	-10.268	-0.36308	-0.352109	-0.561698	0.0420569	0.75714	0.933293	0.0156902	0.652887	0.689342	0.422511
YHR190W	ERG9	-1.0274	-0.300623	-1.22739	-0.734744	-0.25729	-1.07364	-2.0234	0.1089	0.684579	0.0452476	0.24614	0.705377	0.0880123	0.00152926	-1.0274	-0.300623	-1.22739	-0.734744	-0.25729	-1.07364	-2.0234	0.1089	0.684579	0.0452476	0.24614	0.705377	0.0880123	0.00152926
YHR191C	CTF8	#NAME?	0.587909	0.0173713	#NAME?	#NAME?	0.199093	0.809494	NA	0.720132	0.988745	NA	NA	0.914916	0.439409	-10.9027	0.587909	0.0173713	-9.52051	-9.86025	0.199093	0.809494	0.0470104	0.720132	0.988745	0.0493975	0.0111236	0.914916	0.439409
YHR193C	EGD2	-0.566425	-0.478543	-0.455558	-0.397919	-0.401207	-0.602508	-0.776033	0.00150836	0.00695684	0.00559935	0.0168773	0.0137578	0.000814977	5.47505e-05	-0.566425	-0.478543	-0.455558	-0.397919	-0.401207	-0.602508	-0.776033	0.00150836	0.00695684	0.00559935	0.0168773	0.0137578	0.000814977	5.47505e-05
YHR196W	UTP9	0.374449	0.246822	-1.05442	-0.734261	0.21549	-0.860761	-1.74221	0.666152	0.795072	0.156244	0.350886	0.805556	0.274252	0.0153503	0.374449	0.246822	-1.05442	-0.734261	0.21549	-0.860761	-1.74221	0.666152	0.795072	0.156244	0.350886	0.805556	0.274252	0.0153503
YHR197W	RIX1	0.970801	NA	NA	NA	0.342148	NA	NA	0.29559	NA	NA	NA	0.694417	NA	NA	0.970801	NA	NA	NA	0.342148	NA	NA	0.29559	NA	NA	NA	0.694417	NA	NA
YHR198C	AIM18	#NAME?	#NAME?	1.06104	0.720369	-0.383913	-0.175306	#NAME?	NA	NA	0.20478	0.267	0.555505	0.806519	NA	-9.12425	-8.72052	1.06104	0.720369	-0.383913	-0.175306	-11.2542	0.0294754	0.0134833	0.20478	0.267	0.555505	0.806519	0.0325062
YHR199C	AIM46	-0.818915	-0.199972	-0.631784	-0.0402101	0.398342	1.23555	0.214776	0.401615	0.866068	0.356173	0.967591	0.581376	0.0832696	0.754495	-0.818915	-0.199972	-0.631784	-0.0402101	0.398342	1.23555	0.214776	0.401615	0.866068	0.356173	0.967591	0.581376	0.0832696	0.754495
YHR200W	RPN10	-0.286319	-0.415394	-0.461352	-0.0832238	-0.383735	0.0603399	-0.388845	0.317458	0.14339	0.0844075	0.796981	0.162949	0.863081	0.117088	-0.286319	-0.415394	-0.461352	-0.0832238	-0.383735	0.0603399	-0.388845	0.317458	0.14339	0.0844075	0.796981	0.162949	0.863081	0.117088
YHR201C	PPX1	-0.0881051	-0.825284	-1.22225	-0.824314	-0.347894	-1.38659	-1.47511	0.898056	0.142605	0.024836	0.130391	0.547842	0.0135543	0.00538231	-0.0881051	-0.825284	-1.22225	-0.824314	-0.347894	-1.38659	-1.47511	0.898056	0.142605	0.024836	0.130391	0.547842	0.0135543	0.00538231
YHR205W	SCH9	-0.723875	-0.298191	-0.69259	-0.706526	-1.02645	-1.27887	-1.52798	0.330191	0.722182	0.386066	0.334431	0.149758	0.0758265	0.0216585	-0.723875	-0.298191	-0.69259	-0.706526	-1.02645	-1.27887	-1.52798	0.330191	0.722182	0.386066	0.334431	0.149758	0.0758265	0.0216585
YHR206W	SKN7	-0.365008	-0.562141	-0.472141	0.142028	-0.271666	-0.128762	-0.128976	0.716086	0.558647	0.557061	0.897348	0.78235	0.899357	0.874197	-0.365008	-0.562141	-0.472141	0.142028	-0.271666	-0.128762	-0.128976	0.716086	0.558647	0.557061	0.897348	0.78235	0.899357	0.874197
YHR207C	SET5	#NAME?	#NAME?	#NAME?	#NAME?	0.501487	0.789478	#NAME?	NA	NA	NA	NA	0.757475	0.649416	NA	-13.2455	-12.8418	-13.4876	-11.8633	0.501487	0.789478	-15.3754	0.0286062	0.0498928	0.0148296	0.0308307	0.757475	0.649416	0.0304742
YHR208W	BAT1	0.0484531	-0.560996	-0.323591	0.819397	0.688369	-0.616585	0.910083	0.834623	0.00726762	0.0755174	0.00044612	0.00117426	0.00250732	5.91618e-05	0.0484531	-0.560996	-0.323591	0.819397	0.688369	-0.616585	0.910083	0.834623	0.00726762	0.0755174	0.00044612	0.00117426	0.00250732	5.91618e-05
YHR215W	PHO12	Inf	Inf	NA	NA	Inf	Inf	Inf	NA	NA	NA	NA	NA	NA	NA	6.35051	11.7087	NA	NA	12.0412	13.1788	14.2791	0.0474524	0.0488925	NA	NA	0.0336358	0.0177936	0.0134929
YHR216W	IMD2	-0.437645	-2.25665	-2.29314	-0.604553	-0.29119	0.486422	-0.519374	0.464945	0.00092859	0.00100919	0.280799	0.617227	0.405589	0.302876	-0.437645	-2.25665	-2.29314	-0.604553	-0.29119	0.486422	-0.519374	0.464945	0.00092859	0.00100919	0.280799	0.617227	0.405589	0.302876
YIL002W-A	YIL002W-A	-1.48139	-1.84846	-1.41363	-0.389925	-0.473646	-1.64886	-0.822872	0.157196	0.0400348	0.0752854	0.603192	0.52324	0.110513	0.198404	-1.48139	-1.84846	-1.41363	-0.389925	-0.473646	-1.64886	-0.822872	0.157196	0.0400348	0.0752854	0.603192	0.52324	0.110513	0.198404
YIL004C	BET1	-1.12296	-1.83953	#NAME?	-0.962689	-0.183154	-0.848306	-1.18724	0.251621	0.165319	NA	0.379647	0.867979	0.43944	0.170937	-1.12296	-1.83953	-10.5203	-0.962689	-0.183154	-0.848306	-1.18724	0.251621	0.165319	0.0339131	0.379647	0.867979	0.43944	0.170937
YIL005W	EPS1	-0.460036	NA	NA	-0.456311	NA	NA	NA	0.479316	NA	NA	0.466979	NA	NA	NA	-0.460036	NA	NA	-0.456311	NA	NA	NA	0.479316	NA	NA	0.466979	NA	NA	NA
YIL007C	NAS2	-0.18566	0.112532	2.69101	-0.0478197	-0.241308	0.188465	0.411877	0.893868	0.942512	0.0829067	0.978755	0.851692	0.899116	0.71033	-0.18566	0.112532	2.69101	-0.0478197	-0.241308	0.188465	0.411877	0.893868	0.942512	0.0829067	0.978755	0.851692	0.899116	0.71033
YIL008W	URM1	-1.12047	0.0422661	-1.0496	-1.74912	-1.17026	-0.28187	#NAME?	0.120668	0.964736	0.125175	0.0199073	0.137669	0.731913	NA	-1.12047	0.0422661	-1.0496	-1.74912	-1.17026	-0.28187	-17.8624	0.120668	0.964736	0.125175	0.0199073	0.137669	0.731913	0.0308602
YIL010W	DOT5	-1.53609	-0.097082	0.175599	-0.150471	-0.614844	0.335638	-0.10122	0.00962974	0.899395	0.774793	0.819608	0.278686	0.593797	0.865311	-1.53609	-0.097082	0.175599	-0.150471	-0.614844	0.335638	-0.10122	0.00962974	0.899395	0.774793	0.819608	0.278686	0.593797	0.865311
YIL015W	BAR1	-0.490611	-1.80288	-1.14654	-1.65164	-2.3133	-2.58976	-1.44932	0.336064	0.00173673	0.0198318	0.00288712	0.000132595	3.67605e-05	0.00287667	-0.490611	-1.80288	-1.14654	-1.65164	-2.3133	-2.58976	-1.44932	0.336064	0.00173673	0.0198318	0.00288712	0.000132595	3.67605e-05	0.00287667
YIL016W	SNL1	0.541821	0.715394	0.42597	0.744555	1.45197	0.594002	0.613298	0.359862	0.230956	0.461234	0.193326	0.010174	0.255409	0.232216	0.541821	0.715394	0.42597	0.744555	1.45197	0.594002	0.613298	0.359862	0.230956	0.461234	0.193326	0.010174	0.255409	0.232216
YIL020C	HIS6	-0.257925	-0.0133736	-1.11611	0.11815	-0.615501	-0.346969	-0.371852	0.789353	0.988164	0.206916	0.910874	0.465713	0.715047	0.672885	-0.257925	-0.0133736	-1.11611	0.11815	-0.615501	-0.346969	-0.371852	0.789353	0.988164	0.206916	0.910874	0.465713	0.715047	0.672885
YIL021W	RPB3	-0.339681	-1.00864	-0.564913	-0.418562	-0.211011	-0.137464	-0.843429	0.126686	0.000325033	0.0105711	0.0554461	0.346421	0.571425	0.000366065	-0.339681	-1.00864	-0.564913	-0.418562	-0.211011	-0.137464	-0.843429	0.126686	0.000325033	0.0105711	0.0554461	0.346421	0.571425	0.000366065
YIL022W	TIM44	-0.645334	-0.250705	-0.367065	-0.283613	-0.646494	-0.275942	-0.436168	0.044335	0.463442	0.235737	0.384789	0.0406925	0.406042	0.123875	-0.645334	-0.250705	-0.367065	-0.283613	-0.646494	-0.275942	-0.436168	0.044335	0.463442	0.235737	0.384789	0.0406925	0.406042	0.123875
YIL027C	EMC5	-0.393123	-0.766625	-1.04593	-0.508452	0.904758	-0.251073	-0.68208	0.549091	0.22405	0.210114	0.413209	0.137635	0.755726	0.261559	-0.393123	-0.766625	-1.04593	-0.508452	0.904758	-0.251073	-0.68208	0.549091	0.22405	0.210114	0.413209	0.137635	0.755726	0.261559
YIL030C	SSM4	#NAME?	0.130905	#NAME?	#NAME?	0.204875	0.00717895	#NAME?	NA	0.804117	NA	NA	0.587698	0.988076	NA	-8.48616	0.130905	-8.72823	-7.10394	0.204875	0.00717895	-10.6161	0.0243449	0.804117	0.0186525	0.0261462	0.587698	0.988076	0.0134848
YIL033C	BCY1	-1.30407	-0.693448	0.107272	-0.635323	-1.95035	-0.0891319	-0.687684	0.00123356	0.0631668	0.782681	0.0729016	2.9342e-05	0.841784	0.0337198	-1.30407	-0.693448	0.107272	-0.635323	-1.95035	-0.0891319	-0.687684	0.00123356	0.0631668	0.782681	0.0729016	2.9342e-05	0.841784	0.0337198
YIL034C	CAP2	-1.54883	-0.646298	-0.476647	-0.941141	-1.25859	-0.185861	-1.05018	0.000364629	0.0857947	0.173927	0.013623	0.00170179	0.657324	0.00315532	-1.54883	-0.646298	-0.476647	-0.941141	-1.25859	-0.185861	-1.05018	0.000364629	0.0857947	0.173927	0.013623	0.00170179	0.657324	0.00315532
YIL035C	CKA1	0.161829	-1.85326	#NAME?	-0.297251	-1.21641	-0.912402	-1.56703	0.907574	0.127042	NA	0.857665	0.253682	0.396013	0.131668	0.161829	-1.85326	-8.87439	-0.297251	-1.21641	-0.912402	-1.56703	0.907574	0.127042	0.03573	0.857665	0.253682	0.396013	0.131668
YIL036W	CST6	-0.964251	-0.384756	-0.290892	-0.7062	-0.846329	-0.385518	#NAME?	0.327835	0.719005	0.688267	0.372084	0.383934	0.617791	NA	-0.964251	-0.384756	-0.290892	-0.7062	-0.846329	-0.385518	-11.2235	0.327835	0.719005	0.688267	0.372084	0.383934	0.617791	0.0270092
YIL038C	NOT3	-1.0743	-0.693265	-0.696648	-1.13301	-1.41021	-1.06692	-1.22634	0.00962974	0.0888302	0.0681839	0.00747786	0.00132368	0.00896783	0.00190214	-1.0743	-0.693265	-0.696648	-1.13301	-1.41021	-1.06692	-1.22634	0.00962974	0.0888302	0.0681839	0.00747786	0.00132368	0.00896783	0.00190214
YIL039W	TED1	-1.61642	-1.43647	-2.02933	-2.20418	-0.835725	-1.80284	-2.20836	0.14962	0.202282	0.084559	0.131835	0.442981	0.134945	0.0937108	-1.61642	-1.43647	-2.02933	-2.20418	-0.835725	-1.80284	-2.20836	0.14962	0.202282	0.084559	0.131835	0.442981	0.134945	0.0937108
YIL041W	GVP36	-1.04628	-0.217527	-0.00495048	-0.415644	-0.681017	0.483374	-0.370679	4.61242e-05	0.291012	0.984851	0.0369944	0.0017096	0.0160164	0.0373208	-1.04628	-0.217527	-0.00495048	-0.415644	-0.681017	0.483374	-0.370679	4.61242e-05	0.291012	0.984851	0.0369944	0.0017096	0.0160164	0.0373208
YIL043C	CBR1	-1.07571	-0.495143	-0.612512	-1.37689	-0.378589	-0.23633	-1.04731	0.0285036	0.326094	0.187448	0.00752653	0.443171	0.671774	0.018952	-1.07571	-0.495143	-0.612512	-1.37689	-0.378589	-0.23633	-1.04731	0.0285036	0.326094	0.187448	0.00752653	0.443171	0.671774	0.018952
YIL044C	AGE2	-0.595938	0.229055	-0.495034	-0.460918	-1.4644	-0.797576	-0.818669	0.261295	0.708463	0.33335	0.387577	0.00679154	0.124866	0.078085	-0.595938	0.229055	-0.495034	-0.460918	-1.4644	-0.797576	-0.818669	0.261295	0.708463	0.33335	0.387577	0.00679154	0.124866	0.078085
YIL051C	MMF1	-0.891938	-0.093309	-0.363037	-0.387258	-0.950129	-0.0827952	-0.632004	0.000199846	0.683499	0.0555448	0.0482657	8.80278e-05	0.716269	0.00144905	-0.891938	-0.093309	-0.363037	-0.387258	-0.950129	-0.0827952	-0.632004	0.000199846	0.683499	0.0555448	0.0482657	8.80278e-05	0.716269	0.00144905
YIL053W	GPP1	0.248186	0.163101	-0.456565	-0.0755101	0.354149	0.205826	0.888377	0.269902	0.494411	0.0338537	0.766304	0.103105	0.365179	0.000260089	0.248186	0.163101	-0.456565	-0.0755101	0.354149	0.205826	0.888377	0.269902	0.494411	0.0338537	0.766304	0.103105	0.365179	0.000260089
YIL062C	ARC15	-0.827475	-0.251541	-0.0613303	-0.387614	-0.510772	0.0581392	-0.0755994	0.00383237	0.370541	0.835922	0.138432	0.0517364	0.861686	0.779131	-0.827475	-0.251541	-0.0613303	-0.387614	-0.510772	0.0581392	-0.0755994	0.00383237	0.370541	0.835922	0.138432	0.0517364	0.861686	0.779131
YIL063C	YRB2	-1.25897	-0.683626	-0.828653	-0.450527	-0.961654	-1.5333	-1.2976	0.0661688	0.338927	0.206211	0.522776	0.150938	0.0248362	0.034505	-1.25897	-0.683626	-0.828653	-0.450527	-0.961654	-1.5333	-1.2976	0.0661688	0.338927	0.206211	0.522776	0.150938	0.0248362	0.034505
YIL064W	EFM4	-0.201194	0.269566	-0.688924	-0.954514	-0.756342	-0.240827	-0.270938	0.706774	0.604776	0.125175	0.0421964	0.100038	0.65414	0.534486	-0.201194	0.269566	-0.688924	-0.954514	-0.756342	-0.240827	-0.270938	0.706774	0.604776	0.125175	0.0421964	0.100038	0.65414	0.534486
YIL065C	FIS1	-0.516271	0.277933	0.494833	0.369643	-0.38609	1.18464	0.656573	0.59909	0.709271	0.439967	0.583255	0.559484	0.0638343	0.24807	-0.516271	0.277933	0.494833	0.369643	-0.38609	1.18464	0.656573	0.59909	0.709271	0.439967	0.583255	0.559484	0.0638343	0.24807
YIL068C	SEC6	0.0221702	0.0558695	0.0175811	0.170037	-0.364362	0.085473	-0.12081	0.979024	0.946544	0.982929	0.817587	0.579627	0.919935	0.85364	0.0221702	0.0558695	0.0175811	0.170037	-0.364362	0.085473	-0.12081	0.979024	0.946544	0.982929	0.817587	0.579627	0.919935	0.85364
YIL070C	MAM33	-1.3556	0.276602	0.518315	-0.577394	-0.302301	0.914519	-0.14806	0.00448271	0.575303	0.231193	0.189663	0.516455	0.0398772	0.737982	-1.3556	0.276602	0.518315	-0.577394	-0.302301	0.914519	-0.14806	0.00448271	0.575303	0.231193	0.189663	0.516455	0.0398772	0.737982
YIL074C	SER33	0.00573769	0.279426	0.125206	1.09772	2.57486	0.673739	0.466992	0.993209	0.56769	0.792964	0.0168765	1.60928e-05	0.126408	0.236441	0.00573769	0.279426	0.125206	1.09772	2.57486	0.673739	0.466992	0.993209	0.56769	0.792964	0.0168765	1.60928e-05	0.126408	0.236441
YIL075C	RPN2	0.246055	0.271856	-0.669206	-0.276866	0.799216	-0.11261	-1.47461	0.609913	0.575959	0.114874	0.546447	0.0653011	0.837248	0.00110416	0.246055	0.271856	-0.669206	-0.276866	0.799216	-0.11261	-1.47461	0.609913	0.575959	0.114874	0.546447	0.0653011	0.837248	0.00110416
YIL076W	SEC28	-0.718524	0.207362	-0.642723	-0.843836	-0.668354	-1.1125	-1.814	0.110242	0.691007	0.131502	0.0564459	0.127728	0.0138809	0.000235155	-0.718524	0.207362	-0.642723	-0.843836	-0.668354	-1.1125	-1.814	0.110242	0.691007	0.131502	0.0564459	0.127728	0.0138809	0.000235155
YIL078W	THS1	0.142859	-0.371184	-1.12701	-0.364211	0.16312	-0.312727	-0.718196	0.340825	0.0173164	5.17435e-07	0.0159454	0.264263	0.0317022	4.63987e-05	0.142859	-0.371184	-1.12701	-0.364211	0.16312	-0.312727	-0.718196	0.340825	0.0173164	5.17435e-07	0.0159454	0.264263	0.0317022	4.63987e-05
YIL079C	AIR1	#NAME?	0.236312	0.170323	-0.22592	0.218901	-0.203022	#NAME?	NA	0.612805	0.74241	0.677199	0.675043	0.723248	NA	-8.52274	0.236312	0.170323	-0.22592	0.218901	-0.203022	-10.6527	0.0225139	0.612805	0.74241	0.677199	0.675043	0.723248	0.0493309
YIL083C	CAB2	0.0407668	-0.207462	-0.481938	0.268325	-0.141143	0.226344	-0.594819	0.962613	0.767892	0.406227	0.672747	0.834611	0.743286	0.252544	0.0407668	-0.207462	-0.481938	0.268325	-0.141143	0.226344	-0.594819	0.962613	0.767892	0.406227	0.672747	0.834611	0.743286	0.252544
YIL084C	SDS3	0.417984	-0.419371	-0.143004	-0.397417	-0.667895	0.592891	-0.931254	0.724437	0.69714	0.892612	0.728223	0.620819	0.555651	0.315788	0.417984	-0.419371	-0.143004	-0.397417	-0.667895	0.592891	-0.931254	0.724437	0.69714	0.892612	0.728223	0.620819	0.555651	0.315788
YIL091C	UTP25	1.1013	0.0477116	-2.09544	-0.851319	-0.851733	0.474193	-2.13433	0.186663	0.964736	0.0113848	0.299212	0.300663	0.60165	0.0130138	1.1013	0.0477116	-2.09544	-0.851319	-0.851733	0.474193	-2.13433	0.186663	0.964736	0.0113848	0.299212	0.300663	0.60165	0.0130138
YIL093C	RSM25	-0.360518	0.073355	-0.0287783	0.135678	0.0058046	0.430497	0.0280066	0.650052	0.9404	0.972468	0.862601	0.99458	0.538357	0.968697	-0.360518	0.073355	-0.0287783	0.135678	0.0058046	0.430497	0.0280066	0.650052	0.9404	0.972468	0.862601	0.99458	0.538357	0.968697
YIL094C	LYS12	0.0590438	0.28258	0.126905	0.536542	0.388054	0.680618	0.993264	0.868266	0.344401	0.676356	0.0578266	0.167479	0.0185709	0.000805587	0.0590438	0.28258	0.126905	0.536542	0.388054	0.680618	0.993264	0.868266	0.344401	0.676356	0.0578266	0.167479	0.0185709	0.000805587
YIL098C	FMC1	2.50531	2.5889	2.59243	1.51387	1.22927	3.25008	2.2869	0.111025	0.103129	0.0823482	0.331072	0.43299	0.0380093	0.213348	2.50531	2.5889	2.59243	1.51387	1.22927	3.25008	2.2869	0.111025	0.103129	0.0823482	0.331072	0.43299	0.0380093	0.213348
YIL103W	DPH1	0.735838	0.45855	NA	NA	0.0353001	0.299699	NA	0.566841	0.733341	NA	NA	0.977585	0.826329	NA	0.735838	0.45855	NA	NA	0.0353001	0.299699	NA	0.566841	0.733341	NA	NA	0.977585	0.826329	NA
YIL104C	SHQ1	Inf	NA	NA	NA	Inf	NA	NA	NA	NA	NA	NA	NA	NA	NA	9.4352	NA	NA	NA	9.08994	NA	NA	0.0234029	NA	NA	NA	0.0357809	NA	NA
YIL105C	SLM1	-1.68688	-0.925796	-0.907899	-0.998581	-1.07426	-0.996395	-1.66323	0.00600449	0.0792028	0.0962641	0.0499611	0.0344813	0.0505428	0.00153344	-1.68688	-0.925796	-0.907899	-0.998581	-1.07426	-0.996395	-1.66323	0.00600449	0.0792028	0.0962641	0.0499611	0.0344813	0.0505428	0.00153344
YIL106W	MOB1	#NAME?	-1.071	-1.51495	-1.44862	-1.00112	-0.873496	-1.53593	NA	0.47309	0.386641	0.418514	0.549793	0.620077	0.337704	-9.39723	-1.071	-1.51495	-1.44862	-1.00112	-0.873496	-1.53593	0.0287766	0.47309	0.386641	0.418514	0.549793	0.620077	0.337704
YIL108W	YIL108W	0.197899	0.553648	#NAME?	0.59563	1.00723	0.613023	0.0203028	0.880434	0.604776	NA	0.594603	0.307002	0.562891	0.986603	0.197899	0.553648	-7.73038	0.59563	1.00723	0.613023	0.0203028	0.880434	0.604776	0.0245513	0.594603	0.307002	0.562891	0.986603
YIL109C	SEC24	-0.0919869	-0.397766	-0.920897	-0.758159	-0.0311115	-0.00450466	-1.69503	0.827172	0.271839	0.0090404	0.0320256	0.936729	0.994592	5.2797e-05	-0.0919869	-0.397766	-0.920897	-0.758159	-0.0311115	-0.00450466	-1.69503	0.827172	0.271839	0.0090404	0.0320256	0.936729	0.994592	5.2797e-05
YIL110W	HPM1	-0.0954012	-0.690038	-1.64889	-1.25298	-0.476926	-1.11389	-1.17372	0.932759	0.450979	0.0460095	0.135605	0.593593	0.191324	0.122138	-0.0954012	-0.690038	-1.64889	-1.25298	-0.476926	-1.11389	-1.17372	0.932759	0.450979	0.0460095	0.135605	0.593593	0.191324	0.122138
YIL111W	COX5B	#NAME?	#NAME?	0.888388	-0.24112	#NAME?	-0.0204894	-0.50035	NA	NA	0.153621	0.682149	NA	0.981708	0.369548	-11.3441	-10.9404	0.888388	-0.24112	-10.3016	-0.0204894	-0.50035	0.0111594	0.0251114	0.153621	0.682149	0.0207246	0.981708	0.369548
YIL115C	NUP159	-0.895659	-1.80437	-0.530226	-0.620146	-1.1056	-0.207451	-1.30653	0.0356559	0.000629567	0.193525	0.135156	0.0103938	0.671321	0.00190214	-0.895659	-1.80437	-0.530226	-0.620146	-1.1056	-0.207451	-1.30653	0.0356559	0.000629567	0.193525	0.135156	0.0103938	0.671321	0.00190214
YIL116W	HIS5	-0.0717001	1.0538	-0.17178	3.52643	2.56639	0.0456974	0.887293	0.88872	0.0156808	0.691589	2.16827e-07	7.2834e-06	0.932451	0.0184395	-0.0717001	1.0538	-0.17178	3.52643	2.56639	0.0456974	0.887293	0.88872	0.0156808	0.691589	2.16827e-07	7.2834e-06	0.932451	0.0184395
YIL118W	RHO3	-0.407484	-0.244323	-1.0217	0.0166675	-0.329049	-0.439613	-1.63878	0.293203	0.558647	0.00781816	0.977351	0.397924	0.251273	0.000142507	-0.407484	-0.244323	-1.0217	0.0166675	-0.329049	-0.439613	-1.63878	0.293203	0.558647	0.00781816	0.977351	0.397924	0.251273	0.000142507
YIL121W	QDR2	1.85349	2.33741	2.01305	2.50707	3.62818	2.97947	1.59295	0.153084	0.0533907	0.102016	0.0326715	0.00400137	0.0129325	0.15898	1.85349	2.33741	2.01305	2.50707	3.62818	2.97947	1.59295	0.153084	0.0533907	0.102016	0.0326715	0.00400137	0.0129325	0.15898
YIL124W	AYR1	-1.24613	-0.877004	0.0764892	-0.824704	-0.980716	-0.33249	-1.94324	0.0859105	0.23946	0.929532	0.251572	0.16797	0.689149	0.00502351	-1.24613	-0.877004	0.0764892	-0.824704	-0.980716	-0.33249	-1.94324	0.0859105	0.23946	0.929532	0.251572	0.16797	0.689149	0.00502351
YIL125W	KGD1	-1.04438	-1.15602	0.109808	-0.455754	-1.161	1.98869	0.00603136	0.00067111	0.000492246	0.69653	0.0803005	0.0002404	6.02959e-07	0.984724	-1.04438	-1.15602	0.109808	-0.455754	-1.161	1.98869	0.00603136	0.00067111	0.000492246	0.69653	0.0803005	0.0002404	6.02959e-07	0.984724
YIL126W	STH1	-1.60386	-2.06973	-1.58438	-1.20443	-1.48566	-1.56397	-1.55234	0.14962	0.0697269	0.131502	0.269422	0.169719	0.151659	0.11186	-1.60386	-2.06973	-1.58438	-1.20443	-1.48566	-1.56397	-1.55234	0.14962	0.0697269	0.131502	0.269422	0.169719	0.151659	0.11186
YIL133C	RPL16A	-0.0099701	-0.883682	-0.833957	-0.727384	-1.01128	-0.82625	-0.758282	0.979024	0.00353829	0.00285339	0.0101228	0.000843199	0.00343184	0.00348899	-0.0099701	-0.883682	-0.833957	-0.727384	-1.01128	-0.82625	-0.758282	0.979024	0.00353829	0.00285339	0.0101228	0.000843199	0.00343184	0.00348899
YIL135C	VHS2	-1.18402	-0.709499	0.291101	-0.66802	-0.350896	-0.298638	-0.448889	0.369599	0.459543	0.761565	0.519469	0.805019	0.785246	0.637453	-1.18402	-0.709499	0.291101	-0.66802	-0.350896	-0.298638	-0.448889	0.369599	0.459543	0.761565	0.519469	0.805019	0.785246	0.637453
YIL136W	OM45	-1.50675	-1.74843	3.85288	-0.219102	-1.84256	2.10147	1.24602	0.00962974	0.0052443	1.17998e-06	0.678653	0.00111941	0.000354477	0.00795686	-1.50675	-1.74843	3.85288	-0.219102	-1.84256	2.10147	1.24602	0.00962974	0.0052443	1.17998e-06	0.678653	0.00111941	0.000354477	0.00795686
YIL137C	TMA108	-0.951814	-0.794499	-1.15764	-0.645777	-0.490931	0.00391103	-1.3984	0.101795	0.179519	0.0386506	0.260426	0.406067	0.997886	0.010007	-0.951814	-0.794499	-1.15764	-0.645777	-0.490931	0.00391103	-1.3984	0.101795	0.179519	0.0386506	0.260426	0.406067	0.997886	0.010007
YIL138C	TPM2	-0.720219	-0.50299	-0.258156	-0.493355	-0.340863	-0.640798	-0.673232	0.0239847	0.113754	0.404412	0.109676	0.27624	0.039273	0.0192757	-0.720219	-0.50299	-0.258156	-0.493355	-0.340863	-0.640798	-0.673232	0.0239847	0.113754	0.404412	0.109676	0.27624	0.039273	0.0192757
YIL140W	AXL2	-0.451649	0.114581	-0.042223	-0.576484	#NAME?	-0.267906	#NAME?	0.541668	0.917762	0.956389	0.371954	NA	0.733851	NA	-0.451649	0.114581	-0.042223	-0.576484	-7.96296	-0.267906	-11.1354	0.541668	0.917762	0.956389	0.371954	0.04575	0.733851	0.0302971
YIL142W	CCT2	-0.469868	-0.539982	-0.883353	-0.669337	-0.749386	-0.647384	-0.91415	0.0387086	0.0242219	0.000494983	0.00601644	0.00221671	0.00601173	0.000244914	-0.469868	-0.539982	-0.883353	-0.669337	-0.749386	-0.647384	-0.91415	0.0387086	0.0242219	0.000494983	0.00601644	0.00221671	0.00601173	0.000244914
YIL145C	PAN6	-0.7492	-1.0039	-0.925572	-1.11661	-1.05114	-0.185283	-1.3392	0.223026	0.10178	0.110112	0.061365	0.0750078	0.804438	0.0164402	-0.7492	-1.0039	-0.925572	-1.11661	-1.05114	-0.185283	-1.3392	0.223026	0.10178	0.110112	0.061365	0.0750078	0.804438	0.0164402
YIL149C	MLP2	-1.50658	-1.08891	-0.578629	-1.26977	-1.68811	-0.243388	-0.940027	0.027591	0.104395	0.303987	0.120197	0.00754905	0.715092	0.0722061	-1.50658	-1.08891	-0.578629	-1.26977	-1.68811	-0.243388	-0.940027	0.027591	0.104395	0.303987	0.120197	0.00754905	0.715092	0.0722061
YIL154C	IMP2'	#NAME?	-0.523003	-0.944603	-0.822205	-0.791104	0.16987	-0.473276	NA	0.540681	0.335527	0.413204	0.428848	0.841087	0.593133	-10.23	-0.523003	-0.944603	-0.822205	-0.791104	0.16987	-0.473276	0.0144292	0.540681	0.335527	0.413204	0.428848	0.841087	0.593133
YIL155C	GUT2	-0.999664	-0.612714	2.04528	0.0520784	-0.43502	1.78825	1.05448	0.247975	0.448401	0.00808498	0.960419	0.581376	0.0200563	0.117471	-0.999664	-0.612714	2.04528	0.0520784	-0.43502	1.78825	1.05448	0.247975	0.448401	0.00808498	0.960419	0.581376	0.0200563	0.117471
YIL162W	SUC2	-1.31696	-0.67612	0.168803	-0.494878	-1.12306	0.507932	-0.87291	0.063619	0.301783	0.802925	0.444181	0.0694824	0.440106	0.118227	-1.31696	-0.67612	0.168803	-0.494878	-1.12306	0.507932	-0.87291	0.063619	0.301783	0.802925	0.444181	0.0694824	0.440106	0.118227
YIR001C	SGN1	-0.800816	-1.29695	-1.01495	-0.674852	-0.746544	-1.11073	-0.880194	0.512214	0.173726	0.202314	0.414004	0.530051	0.229579	0.278558	-0.800816	-1.29695	-1.01495	-0.674852	-0.746544	-1.11073	-0.880194	0.512214	0.173726	0.202314	0.414004	0.530051	0.229579	0.278558
YIR003W	AIM21	-0.929929	-0.00481421	0.719849	-0.230964	-0.38278	0.635597	0.446223	0.176113	0.994847	0.27218	0.766304	0.587662	0.36075	0.472023	-0.929929	-0.00481421	0.719849	-0.230964	-0.38278	0.635597	0.446223	0.176113	0.994847	0.27218	0.766304	0.587662	0.36075	0.472023
YIR004W	DJP1	-0.487622	-0.0961832	0.116685	-0.368992	-1.00075	-0.665877	-0.882368	0.632424	0.9397	0.916239	0.720572	0.28131	0.50625	0.345548	-0.487622	-0.0961832	0.116685	-0.368992	-1.00075	-0.665877	-0.882368	0.632424	0.9397	0.916239	0.720572	0.28131	0.50625	0.345548
YIR006C	PAN1	-1.40531	-0.556194	-0.426239	-0.775317	-0.848392	-0.141429	-0.52029	6.40968e-06	0.0184862	0.0460005	0.0019732	0.000768574	0.558753	0.011835	-1.40531	-0.556194	-0.426239	-0.775317	-0.848392	-0.141429	-0.52029	6.40968e-06	0.0184862	0.0460005	0.0019732	0.000768574	0.558753	0.011835
YIR008C	PRI1	-0.431145	-0.309131	-0.347933	-0.102425	-0.260928	-0.809522	-0.821511	0.468894	0.62048	0.546142	0.883349	0.658916	0.144862	0.0977655	-0.431145	-0.309131	-0.347933	-0.102425	-0.260928	-0.809522	-0.821511	0.468894	0.62048	0.546142	0.883349	0.658916	0.144862	0.0977655
YIR012W	SQT1	0.76856	0.0124543	-0.726785	-0.513994	0.823654	0.78704	-0.453605	0.257264	0.985933	0.261108	0.453084	0.216638	0.240624	0.456152	0.76856	0.0124543	-0.726785	-0.513994	0.823654	0.78704	-0.453605	0.257264	0.985933	0.261108	0.453084	0.216638	0.240624	0.456152
YIR022W	SEC11	#NAME?	-0.709003	0.576463	-0.0389871	0.518927	0.667547	-0.374838	NA	0.637094	0.749541	0.982361	0.718685	0.618949	0.751076	-11.3377	-0.709003	0.576463	-0.0389871	0.518927	0.667547	-0.374838	0.0372939	0.637094	0.749541	0.982361	0.718685	0.618949	0.751076
YIR026C	YVH1	-0.652611	-0.273139	-1.42774	-1.19936	0.255367	-0.194191	-1.50987	0.411741	0.762984	0.0810766	0.112278	0.763892	0.835942	0.0490236	-0.652611	-0.273139	-1.42774	-1.19936	0.255367	-0.194191	-1.50987	0.411741	0.762984	0.0810766	0.112278	0.763892	0.835942	0.0490236
YIR031C	DAL7	-0.250366	-0.177444	-0.161153	0.452791	4.1536	-0.136138	-0.424674	0.751638	0.835017	0.828823	0.5215	1.44393e-05	0.875409	0.552186	-0.250366	-0.177444	-0.161153	0.452791	4.1536	-0.136138	-0.424674	0.751638	0.835017	0.828823	0.5215	1.44393e-05	0.875409	0.552186
YIR034C	LYS1	0.202542	1.38944	0.364599	1.97573	1.4128	1.41034	1.98146	0.653001	0.00260841	0.361027	0.000165159	0.00153191	0.00146472	4.87479e-05	0.202542	1.38944	0.364599	1.97573	1.4128	1.41034	1.98146	0.653001	0.00260841	0.361027	0.000165159	0.00153191	0.00146472	4.87479e-05
YIR035C	YIR035C	0.118309	0.0308958	-0.323784	0.132253	-0.170696	1.26941	1.0232	0.80275	0.954996	0.418888	0.774352	0.689155	0.00287133	0.00724113	0.118309	0.0308958	-0.323784	0.132253	-0.170696	1.26941	1.0232	0.80275	0.954996	0.418888	0.774352	0.689155	0.00287133	0.00724113
YIR036C	IRC24	-1.86257	-1.08221	-0.247016	-1.0669	-0.802173	-0.433731	-1.42434	0.00208214	0.059168	0.672719	0.051231	0.139702	0.457612	0.00655871	-1.86257	-1.08221	-0.247016	-1.0669	-0.802173	-0.433731	-1.42434	0.00208214	0.059168	0.672719	0.051231	0.139702	0.457612	0.00655871
YIR037W	HYR1	-0.495629	-0.0183844	0.491918	-0.407605	0.47339	-0.19431	-0.275299	0.136418	0.966237	0.119762	0.210959	0.145906	0.596675	0.355507	-0.495629	-0.0183844	0.491918	-0.407605	0.47339	-0.19431	-0.275299	0.136418	0.966237	0.119762	0.210959	0.145906	0.596675	0.355507
YIR038C	GTT1	-2.37357	-1.02689	2.19767	-0.404437	-1.10574	0.434855	-0.319219	0.00315143	0.113763	0.00186808	0.534464	0.114551	0.524718	0.633304	-2.37357	-1.02689	2.19767	-0.404437	-1.10574	0.434855	-0.319219	0.00315143	0.113763	0.00186808	0.534464	0.114551	0.524718	0.633304
YJL001W	PRE3	-0.69541	-0.734172	-0.481975	-1.04925	-0.644405	-0.0241695	-0.639983	0.0297774	0.0271278	0.112195	0.00288712	0.0389236	0.957216	0.0255844	-0.69541	-0.734172	-0.481975	-1.04925	-0.644405	-0.0241695	-0.639983	0.0297774	0.0271278	0.112195	0.00288712	0.0389236	0.957216	0.0255844
YJL002C	OST1	-1.09102	-0.751091	-1.2339	-1.11338	-1.38611	-1.41489	-1.84852	0.0172104	0.0986064	0.00651435	0.0159858	0.00349124	0.00282785	0.000203663	-1.09102	-0.751091	-1.2339	-1.11338	-1.38611	-1.41489	-1.84852	0.0172104	0.0986064	0.00651435	0.0159858	0.00349124	0.00282785	0.000203663
YJL005W	CYR1	-0.225157	0.00115782	-0.198132	-0.336635	#NAME?	-0.0297972	0.0346975	0.748214	0.997807	0.761269	0.603351	NA	0.959225	0.949492	-0.225157	0.00115782	-0.198132	-0.336635	-9.68285	-0.0297972	0.0346975	0.748214	0.997807	0.761269	0.603351	0.0185782	0.959225	0.949492
YJL008C	CCT8	0.150626	-0.264755	-0.737865	-0.423348	-0.603653	-0.564205	-0.938378	0.68752	0.456762	0.0241373	0.195713	0.0650449	0.087201	0.00361475	0.150626	-0.264755	-0.737865	-0.423348	-0.603653	-0.564205	-0.938378	0.68752	0.456762	0.0241373	0.195713	0.0650449	0.087201	0.00361475
YJL010C	NOP9	1.35792	NA	NA	NA	0.169473	NA	NA	0.0518556	NA	NA	NA	0.663206	NA	NA	1.35792	NA	NA	NA	0.169473	NA	NA	0.0518556	NA	NA	NA	0.663206	NA	NA
YJL011C	RPC17	-0.243572	-1.24192	-0.56406	-0.980167	-0.776804	-1.22499	-1.12184	0.757935	0.0779283	0.400472	0.140939	0.257052	0.103619	0.0634035	-0.243572	-1.24192	-0.56406	-0.980167	-0.776804	-1.22499	-1.12184	0.757935	0.0779283	0.400472	0.140939	0.257052	0.103619	0.0634035
YJL012C	VTC4	0.108561	0.518858	-0.694375	-0.529437	-0.370143	2.54516	1.96093	0.880906	0.400006	0.215394	0.372166	0.542475	0.000193905	0.00104044	0.108561	0.518858	-0.694375	-0.529437	-0.370143	2.54516	1.96093	0.880906	0.400006	0.215394	0.372166	0.542475	0.000193905	0.00104044
YJL014W	CCT3	0.135783	-0.281384	-1.04921	-0.441291	-0.255305	-0.37195	-1.03622	0.645473	0.312347	0.000471676	0.0937079	0.346901	0.159658	0.000328389	0.135783	-0.281384	-1.04921	-0.441291	-0.255305	-0.37195	-1.03622	0.645473	0.312347	0.000471676	0.0937079	0.346901	0.159658	0.000328389
YJL020C	BBC1	-0.983032	-0.230053	0.346823	-0.559854	-0.624281	0.154349	-0.507982	0.00041196	0.352125	0.124328	0.0205338	0.00967873	0.54869	0.0192476	-0.983032	-0.230053	0.346823	-0.559854	-0.624281	0.154349	-0.507982	0.00041196	0.352125	0.124328	0.0205338	0.00967873	0.54869	0.0192476
YJL026W	RNR2	-0.483949	0.0319045	-0.0725606	-0.211843	-0.0502478	-0.0182928	-0.618431	0.0331366	0.916994	0.765097	0.355241	0.84437	0.95309	0.00435625	-0.483949	0.0319045	-0.0725606	-0.211843	-0.0502478	-0.0182928	-0.618431	0.0331366	0.916994	0.765097	0.355241	0.84437	0.95309	0.00435625
YJL029C	VPS53	0.492618	NA	NA	NA	NA	NA	NA	0.0871545	NA	NA	NA	NA	NA	NA	0.492618	NA	NA	NA	NA	NA	NA	0.0871545	NA	NA	NA	NA	NA	NA
YJL033W	HCA4	0.302205	-0.150609	-1.83313	-0.940645	0.678119	-0.801155	-0.68534	0.631809	0.833143	0.00230822	0.0958065	0.238517	0.157708	0.17736	0.302205	-0.150609	-1.83313	-0.940645	0.678119	-0.801155	-0.68534	0.631809	0.833143	0.00230822	0.0958065	0.238517	0.157708	0.17736
YJL034W	KAR2	0.219624	0.598017	-0.148468	-0.284055	-0.0492535	-0.37739	-0.603329	0.303636	0.00863606	0.486416	0.166127	0.83789	0.0680958	0.00304037	0.219624	0.598017	-0.148468	-0.284055	-0.0492535	-0.37739	-0.603329	0.303636	0.00863606	0.486416	0.166127	0.83789	0.0680958	0.00304037
YJL036W	SNX4	-0.0435458	0.121559	-0.113217	0.158148	0.204151	0.730718	0.111812	0.969483	0.870679	0.864959	0.817012	0.751507	0.213156	0.869397	-0.0435458	0.121559	-0.113217	0.158148	0.204151	0.730718	0.111812	0.969483	0.870679	0.864959	0.817012	0.751507	0.213156	0.869397
YJL039C	NUP192	-0.423941	-0.776944	NA	-0.981469	0.116684	-1.38565	-1.55782	0.667056	0.379901	NA	0.243201	0.904397	0.103322	0.044716	-0.423941	-0.776944	NA	-0.981469	0.116684	-1.38565	-1.55782	0.667056	0.379901	NA	0.243201	0.904397	0.103322	0.044716
YJL041W	NSP1	-0.796109	-0.901406	-0.450337	-0.926543	-1.01684	-0.579798	-0.758572	0.00493637	0.00291294	0.0772423	0.00208072	0.000787723	0.0294638	0.00340907	-0.796109	-0.901406	-0.450337	-0.926543	-1.01684	-0.579798	-0.758572	0.00493637	0.00291294	0.0772423	0.00208072	0.000787723	0.0294638	0.00340907
YJL049W	CHM7	-0.501007	-0.727564	-0.227451	-0.487622	0.853634	1.08029	#NAME?	0.752546	0.711565	0.907613	0.801091	0.523567	0.472235	NA	-0.501007	-0.727564	-0.227451	-0.487622	0.853634	1.08029	-11.0573	0.752546	0.711565	0.907613	0.801091	0.523567	0.472235	0.012023
YJL050W	MTR4	0.0528809	-0.625128	-1.44001	-1.0341	0.00215883	-0.52321	-1.34811	0.922036	0.135035	0.0012294	0.0156383	0.995552	0.202827	0.00129162	0.0528809	-0.625128	-1.44001	-1.0341	0.00215883	-0.52321	-1.34811	0.922036	0.135035	0.0012294	0.0156383	0.995552	0.202827	0.00129162
YJL052W	TDH1	-0.679965	1.93155	2.45998	1.51249	-1.72262	3.34741	3.04832	0.0440264	4.07698e-05	9.8218e-07	0.000294249	5.12596e-05	2.83716e-08	1.32553e-07	-0.679965	1.93155	2.45998	1.51249	-1.72262	3.34741	3.04832	0.0440264	4.07698e-05	9.8218e-07	0.000294249	5.12596e-05	2.83716e-08	1.32553e-07
YJL053W	PEP8	0.243993	0.274884	-0.148347	-0.474731	0.971938	-0.118947	-0.217444	0.621944	0.578982	0.780204	0.447952	0.0442462	0.876489	0.643935	0.243993	0.274884	-0.148347	-0.474731	0.971938	-0.118947	-0.217444	0.621944	0.578982	0.780204	0.447952	0.0442462	0.876489	0.643935
YJL054W	TIM54	-0.5756	-0.564507	#NAME?	-0.739134	-0.662589	-0.719346	-0.842871	0.198934	0.311931	NA	0.178605	0.139702	0.194075	0.0514789	-0.5756	-0.564507	-12.2746	-0.739134	-0.662589	-0.719346	-0.842871	0.198934	0.311931	0.0435047	0.178605	0.139702	0.194075	0.0514789
YJL055W	YJL055W	-0.48903	0.167034	-0.275349	0.11067	0.033702	0.595679	-0.32523	0.119651	0.633387	0.369778	0.754642	0.926462	0.0543796	0.239942	-0.48903	0.167034	-0.275349	0.11067	0.033702	0.595679	-0.32523	0.119651	0.633387	0.369778	0.754642	0.926462	0.0543796	0.239942
YJL060W	BNA3	-1.08579	-0.138949	-0.650677	-0.493797	2.06932	0.171708	-0.372371	0.0765882	0.857647	0.272428	0.431661	0.00195527	0.824707	0.511279	-1.08579	-0.138949	-0.650677	-0.493797	2.06932	0.171708	-0.372371	0.0765882	0.857647	0.272428	0.431661	0.00195527	0.824707	0.511279
YJL061W	NUP82	-0.263144	-1.53717	-1.86014	-1.35639	-0.388156	-1.19974	-1.83014	0.748214	0.0697269	0.0228141	0.0612258	0.599558	0.0953784	0.0475811	-0.263144	-1.53717	-1.86014	-1.35639	-0.388156	-1.19974	-1.83014	0.748214	0.0697269	0.0228141	0.0612258	0.599558	0.0953784	0.0475811
YJL063C	MRPL8	-1.69335	-1.69227	-1.24366	-0.863785	-2.1691	-0.564765	-3.93574	0.261295	0.270788	0.398722	0.582744	0.139615	0.748767	0.0055837	-1.69335	-1.69227	-1.24366	-0.863785	-2.1691	-0.564765	-3.93574	0.261295	0.270788	0.398722	0.582744	0.139615	0.748767	0.0055837
YJL066C	MPM1	-1.10007	-0.103462	1.36838	-0.196094	-0.719605	1.27114	0.426121	0.134788	0.916994	0.0516925	0.817587	0.329611	0.0788365	0.529776	-1.10007	-0.103462	1.36838	-0.196094	-0.719605	1.27114	0.426121	0.134788	0.916994	0.0516925	0.817587	0.329611	0.0788365	0.529776
YJL068C	YJL068C	-1.26669	-0.358002	0.330791	0.0380261	-1.08853	0.0676347	-0.86329	3.3608e-05	0.127042	0.133715	0.897171	0.000114989	0.815139	0.000439166	-1.26669	-0.358002	0.330791	0.0380261	-1.08853	0.0676347	-0.86329	3.3608e-05	0.127042	0.133715	0.897171	0.000114989	0.815139	0.000439166
YJL069C	UTP18	0.599096	-0.304063	-1.02699	-0.930908	1.00849	-0.48373	-0.870832	0.258881	0.598089	0.0707515	0.109676	0.0535345	0.3653	0.0943183	0.599096	-0.304063	-1.02699	-0.930908	1.00849	-0.48373	-0.870832	0.258881	0.598089	0.0707515	0.109676	0.0535345	0.3653	0.0943183
YJL074C	SMC3	-0.451263	-0.486564	-0.472549	-0.755539	-0.764213	-0.354298	-1.50951	0.532319	0.498605	0.487869	0.253937	0.257052	0.641131	0.0148107	-0.451263	-0.486564	-0.472549	-0.755539	-0.764213	-0.354298	-1.50951	0.532319	0.498605	0.487869	0.253937	0.257052	0.641131	0.0148107
YJL076W	NET1	-1.4114	-1.20515	-0.448276	-0.828314	-1.38264	-0.557917	-0.761849	0.000905146	0.00410095	0.210126	0.0281344	0.000948928	0.13055	0.0245257	-1.4114	-1.20515	-0.448276	-0.828314	-1.38264	-0.557917	-0.761849	0.000905146	0.00410095	0.210126	0.0281344	0.000948928	0.13055	0.0245257
YJL080C	SCP160	-0.513766	-0.694169	-0.46391	-0.613675	-1.00258	-0.597571	-0.923592	0.00493637	0.000827387	0.00777026	0.00175976	1.60827e-05	0.00148117	2.28015e-05	-0.513766	-0.694169	-0.46391	-0.613675	-1.00258	-0.597571	-0.923592	0.00493637	0.000827387	0.00777026	0.00175976	1.60827e-05	0.00148117	2.28015e-05
YJL081C	ARP4	-1.08746	-0.571351	-0.0186306	-0.29399	-1.35528	-0.923397	-0.531045	0.0381965	0.292143	0.977883	0.594603	0.010724	0.0744029	0.252544	-1.08746	-0.571351	-0.0186306	-0.29399	-1.35528	-0.923397	-0.531045	0.0381965	0.292143	0.977883	0.594603	0.010724	0.0744029	0.252544
YJL084C	ALY2	-0.718746	-0.320245	-1.26208	-1.45453	-0.949175	-1.5076	-0.542236	0.129274	0.529871	0.0161767	0.00460774	0.0416315	0.00282023	0.192743	-0.718746	-0.320245	-1.26208	-1.45453	-0.949175	-1.5076	-0.542236	0.129274	0.529871	0.0161767	0.00460774	0.0416315	0.00282023	0.192743
YJL087C	TRL1	1.77822	0.279818	-0.231996	1.0389	-0.323032	-1.09032	#NAME?	0.0121435	0.719362	0.744803	0.116172	0.64565	0.102243	NA	1.77822	0.279818	-0.231996	1.0389	-0.323032	-1.09032	-12.4318	0.0121435	0.719362	0.744803	0.116172	0.64565	0.102243	0.0352119
YJL088W	ARG3	0.112643	2.20182	-0.267577	2.5734	0.0932467	NA	1.40675	0.812197	0.000344814	0.516586	0.000109693	0.829651	NA	0.00149819	0.112643	2.20182	-0.267577	2.5734	0.0932467	NA	1.40675	0.812197	0.000344814	0.516586	0.000109693	0.829651	NA	0.00149819
YJL095W	BCK1	-0.652435	0.111502	0.814201	-0.536686	0.0123755	1.34803	1.16683	0.547729	0.938114	0.412972	0.612822	0.990425	0.177204	0.189336	-0.652435	0.111502	0.814201	-0.536686	0.0123755	1.34803	1.16683	0.547729	0.938114	0.412972	0.612822	0.990425	0.177204	0.189336
YJL096W	MRPL49	-1.06344	-1.42014	0.90264	0.121449	-1.08419	1.45667	-0.183752	0.290623	0.136874	0.318019	0.918993	0.274659	0.119149	0.845763	-1.06344	-1.42014	0.90264	0.121449	-1.08419	1.45667	-0.183752	0.290623	0.136874	0.318019	0.918993	0.274659	0.119149	0.845763
YJL098W	SAP185	-0.535094	NA	NA	-0.566416	-0.862914	-0.456715	-0.337657	0.738885	NA	NA	0.711999	0.532133	0.786806	0.812065	-0.535094	NA	NA	-0.566416	-0.862914	-0.456715	-0.337657	0.738885	NA	NA	0.711999	0.532133	0.786806	0.812065
YJL101C	GSH1	0.12057	-0.564135	-1.21273	-1.33875	-0.0572264	0.334103	-0.58387	0.873874	0.381974	0.0412801	0.0499611	0.933102	0.62851	0.284504	0.12057	-0.564135	-1.21273	-1.33875	-0.0572264	0.334103	-0.58387	0.873874	0.381974	0.0412801	0.0499611	0.933102	0.62851	0.284504
YJL104W	PAM16	-0.553426	-0.00462574	-1.01118	-0.253604	-1.28403	-0.409798	-1.37853	0.610808	0.996621	0.294446	0.829523	0.194367	0.723817	0.118688	-0.553426	-0.00462574	-1.01118	-0.253604	-1.28403	-0.409798	-1.37853	0.610808	0.996621	0.294446	0.829523	0.194367	0.723817	0.118688
YJL109C	UTP10	0.90232	0.340137	#NAME?	-0.685699	0.928407	0.364539	-0.387202	0.253392	0.775372	NA	0.50988	0.234861	0.669841	0.683708	0.90232	0.340137	-8.8222	-0.685699	0.928407	0.364539	-0.387202	0.253392	0.775372	0.0379724	0.50988	0.234861	0.669841	0.683708
YJL111W	CCT7	-0.095682	-0.601775	-1.32742	-0.603513	-0.508838	-0.677252	-1.19423	0.80166	0.069304	0.000294972	0.0564459	0.104146	0.0330658	0.000435973	-0.095682	-0.601775	-1.32742	-0.603513	-0.508838	-0.677252	-1.19423	0.80166	0.069304	0.000294972	0.0564459	0.104146	0.0330658	0.000435973
YJL112W	MDV1	-0.330452	-0.536917	0.557707	0.199721	-1.13167	0.614944	0.0513534	0.789416	0.615955	0.57346	0.877808	0.286253	0.558001	0.962729	-0.330452	-0.536917	0.557707	0.199721	-1.13167	0.614944	0.0513534	0.789416	0.615955	0.57346	0.877808	0.286253	0.558001	0.962729
YJL115W	ASF1	-0.327723	0.369545	0.0455078	-0.0625121	-0.552177	0.276191	-0.096376	0.580096	0.53314	0.946533	0.931734	0.313967	0.657324	0.865311	-0.327723	0.369545	0.0455078	-0.0625121	-0.552177	0.276191	-0.096376	0.580096	0.53314	0.946533	0.931734	0.313967	0.657324	0.865311
YJL117W	PHO86	0.672588	0.266938	-0.678837	-0.00179605	0.759071	0.136346	-0.0892838	0.284529	0.711225	0.256085	0.999046	0.218675	0.861258	0.888883	0.672588	0.266938	-0.678837	-0.00179605	0.759071	0.136346	-0.0892838	0.284529	0.711225	0.256085	0.999046	0.218675	0.861258	0.888883
YJL121C	RPE1	-0.681946	-0.496906	-0.543908	-0.808411	-0.83544	-0.826547	-0.692805	0.0300262	0.114991	0.0683137	0.0128539	0.00866487	0.00947065	0.0159614	-0.681946	-0.496906	-0.543908	-0.808411	-0.83544	-0.826547	-0.692805	0.0300262	0.114991	0.0683137	0.0128539	0.00866487	0.00947065	0.0159614
YJL122W	ALB1	-0.451519	-0.615985	-1.60057	-2.00315	-0.99992	-1.18716	-2.10522	0.570909	0.482841	0.0275415	0.0110967	0.167018	0.103758	0.00777851	-0.451519	-0.615985	-1.60057	-2.00315	-0.99992	-1.18716	-2.10522	0.570909	0.482841	0.0275415	0.0110967	0.167018	0.103758	0.00777851
YJL123C	MTC1	-0.703505	-0.804338	0.13237	-0.188047	-1.02069	0.554966	-0.173264	0.0213956	0.0125522	0.677496	0.545524	0.00180799	0.060816	0.533584	-0.703505	-0.804338	0.13237	-0.188047	-1.02069	0.554966	-0.173264	0.0213956	0.0125522	0.677496	0.545524	0.00180799	0.060816	0.533584
YJL124C	LSM1	-1.511	-1.17058	0.0788966	-0.87112	-1.16679	-1.1333	-1.22214	0.111759	0.174283	0.938326	0.30185	0.159359	0.177204	0.101603	-1.511	-1.17058	0.0788966	-0.87112	-1.16679	-1.1333	-1.22214	0.111759	0.174283	0.938326	0.30185	0.159359	0.177204	0.101603
YJL125C	GCD14	-1.40897	-0.62679	-1.06482	-0.630933	-0.00126371	-0.489277	-1.90733	0.0191273	0.306116	0.060044	0.281429	0.997934	0.425777	0.00135075	-1.40897	-0.62679	-1.06482	-0.630933	-0.00126371	-0.489277	-1.90733	0.0191273	0.306116	0.060044	0.281429	0.997934	0.425777	0.00135075
YJL128C	PBS2	-0.660859	-0.896717	-0.308413	-0.919608	-0.966718	-0.0816614	-1.1118	0.226047	0.100092	0.577006	0.0813789	0.0659857	0.907987	0.0228772	-0.660859	-0.896717	-0.308413	-0.919608	-0.966718	-0.0816614	-1.1118	0.226047	0.100092	0.577006	0.0813789	0.0659857	0.907987	0.0228772
YJL130C	URA2	-0.268295	-0.290244	-0.710289	-0.536345	-0.348372	-0.324965	-1.0715	0.116189	0.0936826	0.000279286	0.00384667	0.0380592	0.0538603	4.31262e-06	-0.268295	-0.290244	-0.710289	-0.536345	-0.348372	-0.324965	-1.0715	0.116189	0.0936826	0.000279286	0.00384667	0.0380592	0.0538603	4.31262e-06
YJL133C-A	YJL133C-A	#NAME?	#NAME?	-0.730023	-0.188412	#NAME?	0.41905	-0.713153	NA	NA	0.623789	0.915745	NA	0.716269	0.494954	-11.1168	-10.7131	-0.730023	-0.188412	-10.0744	0.41905	-0.713153	0.0309935	0.0439034	0.623789	0.915745	0.0251334	0.716269	0.494954
YJL136C	RPS21B	0.434808	0.0923244	0.0945766	0.348067	0.169974	-0.103502	-0.232747	0.0540222	0.724213	0.692795	0.115537	0.462014	0.689149	0.244228	0.434808	0.0923244	0.0945766	0.348067	0.169974	-0.103502	-0.232747	0.0540222	0.724213	0.692795	0.115537	0.462014	0.689149	0.244228
YJL140W	RPB4	-0.874481	-0.933104	-0.813035	-0.731002	-1.14138	-0.749569	-0.799533	0.0305113	0.0264217	0.0358292	0.0641455	0.00593407	0.0576046	0.026902	-0.874481	-0.933104	-0.813035	-0.731002	-1.14138	-0.749569	-0.799533	0.0305113	0.0264217	0.0358292	0.0641455	0.00593407	0.0576046	0.026902
YJL141C	YAK1	-0.510955	-0.376863	-0.123435	-0.293932	-0.836545	0.0503359	-0.689904	0.528107	0.699894	0.884683	0.724536	0.324881	0.959225	0.362793	-0.510955	-0.376863	-0.123435	-0.293932	-0.836545	0.0503359	-0.689904	0.528107	0.699894	0.884683	0.724536	0.324881	0.959225	0.362793
YJL145W	SFH5	0.320718	-0.542464	-1.10406	-1.35874	1.34697	-0.716346	-1.74538	0.716086	0.513188	0.133715	0.0740324	0.074882	0.364231	0.0260303	0.320718	-0.542464	-1.10406	-1.35874	1.34697	-0.716346	-1.74538	0.716086	0.513188	0.133715	0.0740324	0.074882	0.364231	0.0260303
YJL148W	RPA34	0.29195	-0.624028	-0.305095	-0.444419	-0.423868	-0.426758	-0.540878	0.479836	0.118423	0.491917	0.252355	0.27812	0.283087	0.162734	0.29195	-0.624028	-0.305095	-0.444419	-0.423868	-0.426758	-0.540878	0.479836	0.118423	0.491917	0.252355	0.27812	0.283087	0.162734
YJL151C	SNA3	0.869476	1.32154	0.864535	2.11291	1.21973	0.681444	1.42521	0.257284	0.0933376	0.236909	0.0439335	0.105587	0.425871	0.0577725	0.869476	1.32154	0.864535	2.11291	1.21973	0.681444	1.42521	0.257284	0.0933376	0.236909	0.0439335	0.105587	0.425871	0.0577725
YJL158C	CIS3	-0.444365	-0.0822585	-0.0600858	-0.738182	0.127474	-0.152764	-1.13121	0.539572	0.927814	0.940859	0.263888	0.870026	0.85603	0.0566902	-0.444365	-0.0822585	-0.0600858	-0.738182	0.127474	-0.152764	-1.13121	0.539572	0.927814	0.940859	0.263888	0.870026	0.85603	0.0566902
YJL159W	HSP150	-2.49441	#NAME?	#NAME?	#NAME?	-1.38255	0.146809	#NAME?	0.0544803	NA	NA	NA	0.187232	0.852345	NA	-2.49441	-12.4972	-13.143	-11.5187	-1.38255	0.146809	-15.0308	0.0544803	0.0329605	0.042274	0.0364304	0.187232	0.852345	0.0430903
YJL164C	TPK1	#NAME?	#NAME?	1.07981	0.18993	#NAME?	0.914591	#NAME?	NA	NA	0.227232	0.83707	NA	0.364231	NA	-9.68846	-9.28473	1.07981	0.18993	-8.64599	0.914591	-11.8184	0.0105605	0.0384073	0.227232	0.83707	0.0455008	0.364231	0.0158471
YJL165C	HAL5	-0.848403	-0.443049	-0.849451	-0.324441	#NAME?	0.326184	#NAME?	0.327314	0.587744	0.299671	0.724536	NA	0.701865	NA	-0.848403	-0.443049	-0.849451	-0.324441	-11.0306	0.326184	-14.203	0.327314	0.587744	0.299671	0.724536	0.018964	0.701865	0.0180211
YJL166W	QCR8	0.719699	0.205705	-4.01663	NA	0.388816	1.55479	-3.91444	0.862692	0.964736	0.223383	NA	0.921282	0.689149	0.196572	0.719699	0.205705	-4.01663	NA	0.388816	1.55479	-3.91444	0.862692	0.964736	0.223383	NA	0.921282	0.689149	0.196572
YJL167W	ERG20	-0.0645657	-0.0885861	-0.507031	-0.476488	0.336201	0.24565	-0.728249	0.820966	0.750797	0.0285989	0.044175	0.149758	0.309418	0.00196216	-0.0645657	-0.0885861	-0.507031	-0.476488	0.336201	0.24565	-0.728249	0.820966	0.750797	0.0285989	0.044175	0.149758	0.309418	0.00196216
YJL168C	SET2	-0.349345	-0.760414	-0.979422	-0.21879	-0.679011	-0.742315	-0.747983	0.605827	0.244918	0.0776567	0.722829	0.401596	0.244113	0.183047	-0.349345	-0.760414	-0.979422	-0.21879	-0.679011	-0.742315	-0.747983	0.605827	0.244918	0.0776567	0.722829	0.401596	0.244113	0.183047
YJL171C	TOH1	-0.288492	0.596602	-0.260968	-0.101688	0.273436	1.3774	-0.0784181	0.463666	0.113088	0.489029	0.814969	0.47421	0.000849783	0.836996	-0.288492	0.596602	-0.260968	-0.101688	0.273436	1.3774	-0.0784181	0.463666	0.113088	0.489029	0.814969	0.47421	0.000849783	0.836996
YJL172W	CPS1	-1.0784	-0.225106	-0.581666	-0.934205	1.29559	-0.513504	-1.21206	0.00122572	0.481516	0.0426215	0.00394519	0.000243916	0.081323	0.000230746	-1.0784	-0.225106	-0.581666	-0.934205	1.29559	-0.513504	-1.21206	0.00122572	0.481516	0.0426215	0.00394519	0.000243916	0.081323	0.000230746
YJL173C	RFA3	-0.693043	0.0909321	-0.355091	-0.522992	-0.726436	-0.306674	-0.22927	0.0126763	0.778763	0.167805	0.0500193	0.00851726	0.257314	0.343935	-0.693043	0.0909321	-0.355091	-0.522992	-0.726436	-0.306674	-0.22927	0.0126763	0.778763	0.167805	0.0500193	0.00851726	0.257314	0.343935
YJL174W	KRE9	0.0157877	-0.179751	-0.753754	-0.0553358	0.702017	-0.0133266	-0.362516	0.98211	0.75748	0.11453	0.933621	0.149758	0.984858	0.472115	0.0157877	-0.179751	-0.753754	-0.0553358	0.702017	-0.0133266	-0.362516	0.98211	0.75748	0.11453	0.933621	0.149758	0.984858	0.472115
YJL176C	SWI3	-1.14971	-1.64779	-0.951884	-0.49326	-0.901399	-0.932183	-0.862293	0.0618514	0.023844	0.104125	0.429255	0.134655	0.124805	0.11186	-1.14971	-1.64779	-0.951884	-0.49326	-0.901399	-0.932183	-0.862293	0.0618514	0.023844	0.104125	0.429255	0.134655	0.124805	0.11186
YJL177W	RPL17B	-0.075069	-0.196347	-0.0363317	0.149572	-0.408803	-0.370501	-0.540011	0.838563	0.55513	0.918782	0.647051	0.16848	0.219345	0.0458286	-0.075069	-0.196347	-0.0363317	0.149572	-0.408803	-0.370501	-0.540011	0.838563	0.55513	0.918782	0.647051	0.16848	0.219345	0.0458286
YJL178C	ATG27	-1.29137	-1.59988	-1.48605	-1.53948	-1.19953	-1.03964	#NAME?	0.0801689	0.0854603	0.0407417	0.0292253	0.0694824	0.114147	NA	-1.29137	-1.59988	-1.48605	-1.53948	-1.19953	-1.03964	-12.2892	0.0801689	0.0854603	0.0407417	0.0292253	0.0694824	0.114147	0.0140158
YJL179W	PFD1	-0.607818	-0.908529	-0.411481	-0.666492	-0.602546	-0.793476	-0.632034	0.151378	0.039609	0.311633	0.106219	0.144388	0.055501	0.0883911	-0.607818	-0.908529	-0.411481	-0.666492	-0.602546	-0.793476	-0.632034	0.151378	0.039609	0.311633	0.106219	0.144388	0.055501	0.0883911
YJL180C	ATP12	1.27712	NA	-1.30916	NA	-1.31414	-0.388431	NA	0.726754	NA	0.712224	NA	0.715439	0.926097	NA	1.27712	NA	-1.30916	NA	-1.31414	-0.388431	NA	0.726754	NA	0.712224	NA	0.715439	0.926097	NA
YJL183W	MNN11	-1.69316	-1.42356	-1.72924	-1.85016	-0.291784	-0.275526	-1.89723	0.0286489	0.0697269	0.0359532	0.0188597	0.718565	0.758633	0.0162588	-1.69316	-1.42356	-1.72924	-1.85016	-0.291784	-0.275526	-1.89723	0.0286489	0.0697269	0.0359532	0.0188597	0.718565	0.758633	0.0162588
YJL184W	GON7	-0.861208	-0.745867	-0.302541	0.214708	-0.0900111	-0.0802404	0.386035	0.0612046	0.109541	0.518394	0.666665	0.865002	0.894328	0.350062	-0.861208	-0.745867	-0.302541	0.214708	-0.0900111	-0.0802404	0.386035	0.0612046	0.109541	0.518394	0.666665	0.865002	0.894328	0.350062
YJL186W	MNN5	-0.608077	-1.08972	#NAME?	-1.34445	-0.877041	-0.525679	-1.31936	0.225171	0.0462971	NA	0.0102742	0.0534634	0.289762	0.0268756	-0.608077	-1.08972	-12.7369	-1.34445	-0.877041	-0.525679	-1.31936	0.225171	0.0462971	0.017613	0.0102742	0.0534634	0.289762	0.0268756
YJL189W	RPL39	-0.573252	-0.596518	-0.356825	-0.812214	-0.0282326	-0.210051	-0.609031	0.162053	0.14697	0.370533	0.0444739	0.949677	0.650275	0.0894629	-0.573252	-0.596518	-0.356825	-0.812214	-0.0282326	-0.210051	-0.609031	0.162053	0.14697	0.370533	0.0444739	0.949677	0.650275	0.0894629
YJL191W	RPS14B	-0.566115	-0.97555	-0.986641	-0.0273089	0.264369	0.831609	-0.812941	0.0752076	0.00570161	0.0029188	0.951551	0.416691	0.0105705	0.0070621	-0.566115	-0.97555	-0.986641	-0.0273089	0.264369	0.831609	-0.812941	0.0752076	0.00570161	0.0029188	0.951551	0.416691	0.0105705	0.0070621
YJL192C	SOP4	-0.658013	-0.515856	-0.319128	-0.273121	#NAME?	-0.0996239	#NAME?	0.00340144	0.00499476	0.0216915	0.0385218	NA	0.205784	NA	-0.658013	-0.515856	-0.319128	-0.273121	-11.2293	-0.0996239	-14.4017	0.00340144	0.00499476	0.0216915	0.0385218	0.0481079	0.205784	0.017318
YJL196C	ELO1	-0.658705	NA	NA	NA	NA	NA	NA	0.462807	NA	NA	NA	NA	NA	NA	-0.658705	NA	NA	NA	NA	NA	NA	0.462807	NA	NA	NA	NA	NA	NA
YJL197W	UBP12	0.583383	0.807127	0.403452	-0.0399959	-0.036734	0.913823	0.414472	0.513934	0.299292	0.60216	0.970165	0.965476	0.222271	0.552316	0.583383	0.807127	0.403452	-0.0399959	-0.036734	0.913823	0.414472	0.513934	0.299292	0.60216	0.970165	0.965476	0.222271	0.552316
YJL198W	PHO90	-1.1039	-0.290192	-1.02646	-0.987516	0.0647805	-0.824798	-0.363644	0.0835779	0.677101	0.0900084	0.112278	0.926462	0.137898	0.516472	-1.1039	-0.290192	-1.02646	-0.987516	0.0647805	-0.824798	-0.363644	0.0835779	0.677101	0.0900084	0.112278	0.926462	0.137898	0.516472
YJL200C	ACO2	0.269208	0.0450233	-0.428549	1.25129	0.5583	0.487271	0.731008	0.430201	0.917762	0.16711	0.000877677	0.0779343	0.12936	0.0149618	0.269208	0.0450233	-0.428549	1.25129	0.5583	0.487271	0.731008	0.430201	0.917762	0.16711	0.000877677	0.0779343	0.12936	0.0149618
YJL201W	ECM25	#NAME?	-0.157887	#NAME?	#NAME?	0.384608	0.227235	#NAME?	NA	0.905137	NA	NA	0.59712	0.811506	NA	-11.0632	-0.157887	-11.3053	-9.68099	0.384608	0.227235	-13.1932	0.0253701	0.905137	0.0378661	0.037154	0.59712	0.811506	0.0454514
YJL208C	NUC1	-0.70445	-0.418728	-0.375574	-0.275552	-0.0396898	0.425941	-0.540099	0.147873	0.410765	0.435263	0.58682	0.94125	0.391918	0.204908	-0.70445	-0.418728	-0.375574	-0.275552	-0.0396898	0.425941	-0.540099	0.147873	0.410765	0.435263	0.58682	0.94125	0.391918	0.204908
YJL217W	REE1	0.250743	0.49398	-0.0330847	0.29492	-0.296985	1.35434	0.0137992	0.632777	0.321984	0.956389	0.554852	0.549793	0.00623148	0.979235	0.250743	0.49398	-0.0330847	0.29492	-0.296985	1.35434	0.0137992	0.632777	0.321984	0.956389	0.554852	0.549793	0.00623148	0.979235
YJR001W	AVT1	#NAME?	-1.06253	-0.897271	-0.898261	0.796981	-0.0315726	-1.26162	NA	0.358721	0.36322	0.380574	0.563012	0.983993	0.202833	-8.75008	-1.06253	-0.897271	-0.898261	0.796981	-0.0315726	-1.26162	0.03912	0.358721	0.36322	0.380574	0.563012	0.983993	0.202833
YJR002W	MPP10	-0.156333	-0.708423	-0.7985	-1.03636	-1.12898	-0.968158	-0.780417	0.726754	0.0760835	0.033614	0.0108942	0.00519914	0.0133589	0.025844	-0.156333	-0.708423	-0.7985	-1.03636	-1.12898	-0.968158	-0.780417	0.726754	0.0760835	0.033614	0.0108942	0.00519914	0.0133589	0.025844
YJR007W	SUI2	-0.398706	-0.516082	-0.861594	-0.434156	-0.1635	-1.14012	-1.36803	0.200829	0.0991895	0.00589707	0.149932	0.608307	0.000870507	0.000109181	-0.398706	-0.516082	-0.861594	-0.434156	-0.1635	-1.14012	-1.36803	0.200829	0.0991895	0.00589707	0.149932	0.608307	0.000870507	0.000109181
YJR009C	TDH2	0.621149	0.544751	-0.108426	-0.560688	0.137644	2.10455	1.89911	0.161007	0.225133	0.82262	0.193326	0.780295	7.56292e-05	0.000135587	0.621149	0.544751	-0.108426	-0.560688	0.137644	2.10455	1.89911	0.161007	0.225133	0.82262	0.193326	0.780295	7.56292e-05	0.000135587
YJR010W	MET3	0.559055	0.893837	1.70896	-0.299421	5.17813	0.669422	1.17846	0.386159	0.162092	0.00870225	0.686605	1.84382e-06	0.337481	0.0385428	0.559055	0.893837	1.70896	-0.299421	5.17813	0.669422	1.17846	0.386159	0.162092	0.00870225	0.686605	1.84382e-06	0.337481	0.0385428
YJR014W	TMA22	0.0698863	-0.184851	-0.404381	0.298695	0.161774	-0.381662	-0.739327	0.792098	0.439278	0.0604712	0.174051	0.484598	0.0851359	0.00119174	0.0698863	-0.184851	-0.404381	0.298695	0.161774	-0.381662	-0.739327	0.792098	0.439278	0.0604712	0.174051	0.484598	0.0851359	0.00119174
YJR016C	ILV3	-0.653807	-0.970415	-0.448248	0.179296	-0.454675	-1.4188	-0.357176	0.000970147	4.82323e-05	0.0104599	0.305143	0.0104905	2.26381e-07	0.02456	-0.653807	-0.970415	-0.448248	0.179296	-0.454675	-1.4188	-0.357176	0.000970147	4.82323e-05	0.0104599	0.305143	0.0104905	2.26381e-07	0.02456
YJR017C	ESS1	-0.675195	0.0118847	0.100707	-0.146114	-0.208179	0.330284	0.113868	0.09442	0.98255	0.821303	0.747573	0.617321	0.431611	0.779131	-0.675195	0.0118847	0.100707	-0.146114	-0.208179	0.330284	0.113868	0.09442	0.98255	0.821303	0.747573	0.617321	0.431611	0.779131
YJR019C	TES1	#NAME?	-0.00326093	#NAME?	#NAME?	#NAME?	1.8589	0.731742	NA	0.997322	NA	NA	NA	0.0463456	0.392644	-12.2917	-0.00326093	-12.5338	-10.9095	-11.2492	1.8589	0.731742	0.0267105	0.997322	0.0237156	0.0473426	0.0211742	0.0463456	0.392644
YJR022W	LSM8	0.448604	-0.178278	0.230035	-0.304351	0.42965	0.492292	-0.311203	0.242911	0.672033	0.543207	0.422018	0.257117	0.307831	0.296356	0.448604	-0.178278	0.230035	-0.304351	0.42965	0.492292	-0.311203	0.242911	0.672033	0.543207	0.422018	0.257117	0.307831	0.296356
YJR024C	MDE1	-1.24043	-0.583005	-1.48909	-2.17034	-1.55267	-1.52412	-1.79859	0.190105	0.673425	0.101338	0.043405	0.0961885	0.219554	0.0542147	-1.24043	-0.583005	-1.48909	-2.17034	-1.55267	-1.52412	-1.79859	0.190105	0.673425	0.101338	0.043405	0.0961885	0.219554	0.0542147
YJR025C	BNA1	-1.77751	-0.435958	0.331663	1.18622	0.355287	0.246526	0.811048	6.81984e-06	0.12786	0.222792	0.000520308	0.206325	0.40044	0.00311995	-1.77751	-0.435958	0.331663	1.18622	0.355287	0.246526	0.811048	6.81984e-06	0.12786	0.222792	0.000520308	0.206325	0.40044	0.00311995
YJR032W	CPR7	0.178435	-0.523222	-0.590592	-0.937059	0.781287	-0.226491	-0.69287	0.883126	0.632458	0.602149	0.343437	0.431917	0.852589	0.487754	0.178435	-0.523222	-0.590592	-0.937059	0.781287	-0.226491	-0.69287	0.883126	0.632458	0.602149	0.343437	0.431917	0.852589	0.487754
YJR033C	RAV1	#NAME?	0.808737	2.30131	2.78149	1.39195	1.77321	3.0362	NA	0.693225	0.0829067	0.0495125	0.44055	0.18868	0.0213115	-7.00676	0.808737	2.30131	2.78149	1.39195	1.77321	3.0362	0.0466766	0.693225	0.0829067	0.0495125	0.44055	0.18868	0.0213115
YJR045C	SSC1	-0.413517	0.20261	0.563465	-0.35449	-0.326294	0.813713	-0.0986931	0.0134461	0.225133	0.00128898	0.0308729	0.042256	5.15114e-05	0.511279	-0.413517	0.20261	0.563465	-0.35449	-0.326294	0.813713	-0.0986931	0.0134461	0.225133	0.00128898	0.0308729	0.042256	5.15114e-05	0.511279
YJR046W	TAH11	1.42837	1.18523	0.256778	-0.0949522	1.06424	0.730138	0.461526	0.13549	0.222335	0.799003	0.944325	0.261026	0.461259	0.602235	1.42837	1.18523	0.256778	-0.0949522	1.06424	0.730138	0.461526	0.13549	0.222335	0.799003	0.944325	0.261026	0.461259	0.602235
YJR047C	ANB1	Inf	Inf	Inf	NA	Inf	NA	NA	NA	NA	NA	NA	NA	NA	NA	12.8799	11.8023	7.55954	NA	14.1847	NA	NA	0.0388455	0.0158447	0.0256139	NA	0.0296399	NA	NA
YJR048W	CYC1	-0.0711842	0.709342	0.840003	1.13071	-0.598303	3.6713	1.85728	0.942757	0.352451	0.232626	0.115201	0.475748	6.28816e-05	0.00758591	-0.0711842	0.709342	0.840003	1.13071	-0.598303	3.6713	1.85728	0.942757	0.352451	0.232626	0.115201	0.475748	6.28816e-05	0.00758591
YJR049C	UTR1	0.261083	0.346906	0.0837385	0.229396	0.551522	0.22713	0.61485	0.80177	0.733351	0.936997	0.84506	0.545757	0.835942	0.439409	0.261083	0.346906	0.0837385	0.229396	0.551522	0.22713	0.61485	0.80177	0.733351	0.936997	0.84506	0.545757	0.835942	0.439409
YJR051W	OSM1	-0.476085	-0.602473	-0.081951	#NAME?	-0.567853	-0.255357	#NAME?	0.631809	0.380127	0.922633	NA	0.44055	0.730593	NA	-0.476085	-0.602473	-0.081951	-9.64176	-0.567853	-0.255357	-13.1539	0.631809	0.380127	0.922633	0.0115487	0.44055	0.730593	0.0314816
YJR055W	HIT1	1.35032	1.61149	#NAME?	0.113875	#NAME?	#NAME?	-0.0352928	0.715011	0.698152	NA	0.986373	NA	NA	0.994893	1.35032	1.61149	-9.71974	0.113875	-8.43519	-7.73563	-0.0352928	0.715011	0.698152	0.0280795	0.986373	0.0403344	0.0330651	0.994893
YJR057W	CDC8	#NAME?	#NAME?	#NAME?	0.362151	-0.468383	#NAME?	1.4345	NA	NA	NA	0.564207	0.542037	NA	0.0638562	-7.10705	-6.70332	-7.34913	0.362151	-0.468383	-5.36502	1.4345	0.0425473	0.0366008	0.0375512	0.564207	0.542037	0.0438446	0.0638562
YJR059W	PTK2	0.564635	-0.0307428	0.503825	0.155869	-0.263047	0.515815	-0.227571	0.459279	0.973717	0.490197	0.858488	0.73892	0.505228	0.749942	0.564635	-0.0307428	0.503825	0.155869	-0.263047	0.515815	-0.227571	0.459279	0.973717	0.490197	0.858488	0.73892	0.505228	0.749942
YJR060W	CBF1	-0.912389	-0.646263	-0.1972	-0.105479	-0.48542	0.334959	0.311179	0.0954101	0.250302	0.734032	0.875676	0.3844	0.577416	0.539507	-0.912389	-0.646263	-0.1972	-0.105479	-0.48542	0.334959	0.311179	0.0954101	0.250302	0.734032	0.875676	0.3844	0.577416	0.539507
YJR062C	NTA1	1.39816	0.670413	#NAME?	#NAME?	#NAME?	0.861995	0.598061	0.566957	0.788178	NA	NA	NA	0.669841	0.771951	1.39816	0.670413	-9.79496	-8.17066	-8.51041	0.861995	0.598061	0.566957	0.788178	0.0210834	0.0316616	0.0123816	0.669841	0.771951
YJR063W	RPA12	-1.04565	-1.0138	-0.628698	-0.786312	-1.11709	-0.853251	-1.38668	0.017834	0.0259629	0.127302	0.0652136	0.0108718	0.0467216	0.00144142	-1.04565	-1.0138	-0.628698	-0.786312	-1.11709	-0.853251	-1.38668	0.017834	0.0259629	0.127302	0.0652136	0.0108718	0.0467216	0.00144142
YJR064W	CCT5	-0.221488	-0.719603	-0.770674	-0.586769	-0.432108	-0.854716	-1.09433	0.351964	0.0052585	0.00171832	0.0146438	0.05698	0.000884449	6.46024e-05	-0.221488	-0.719603	-0.770674	-0.586769	-0.432108	-0.854716	-1.09433	0.351964	0.0052585	0.00171832	0.0146438	0.05698	0.000884449	6.46024e-05
YJR065C	ARP3	-0.574826	-0.220562	-0.0173558	-0.155749	-0.452802	0.205923	-0.370438	0.0253319	0.408217	0.956389	0.554322	0.0671303	0.434551	0.0963874	-0.574826	-0.220562	-0.0173558	-0.155749	-0.452802	0.205923	-0.370438	0.0253319	0.408217	0.956389	0.554322	0.0671303	0.434551	0.0963874
YJR067C	YAE1	#NAME?	#NAME?	#NAME?	#NAME?	#NAME?	-0.205763	-0.437565	NA	NA	NA	NA	NA	0.840909	0.618357	-9.74029	-9.33656	-9.98236	-8.35807	-8.69781	-0.205763	-0.437565	0.0143463	0.0362235	0.0380729	0.0484308	0.0134854	0.840909	0.618357
YJR068W	RFC2	-0.846456	-0.795984	-0.877956	-0.762211	-0.854548	-1.29646	-1.29129	0.101795	0.127634	0.0747367	0.131835	0.0901694	0.0130719	0.00793063	-0.846456	-0.795984	-0.877956	-0.762211	-0.854548	-1.29646	-1.29129	0.101795	0.127634	0.0747367	0.131835	0.0901694	0.0130719	0.00793063
YJR069C	HAM1	-0.776198	-0.231592	-1.22624	-1.15574	-0.847113	-0.531951	-0.908223	0.130291	0.698476	0.0154556	0.0253555	0.0897411	0.304819	0.0463538	-0.776198	-0.231592	-1.22624	-1.15574	-0.847113	-0.531951	-0.908223	0.130291	0.698476	0.0154556	0.0253555	0.0897411	0.304819	0.0463538
YJR070C	LIA1	0.255058	-0.34234	-0.563362	-0.731312	-0.236518	-0.770839	-1.02901	0.227028	0.104395	0.00718495	0.00187383	0.257117	0.000851753	4.38061e-05	0.255058	-0.34234	-0.563362	-0.731312	-0.236518	-0.770839	-1.02901	0.227028	0.104395	0.00718495	0.00187383	0.257117	0.000851753	4.38061e-05
YJR072C	NPA3	-0.96939	-0.924711	-1.18106	-1.23418	-0.832004	-1.20418	-1.59504	0.00607386	0.0106555	0.00114143	0.00135008	0.014011	0.00110333	6.12423e-05	-0.96939	-0.924711	-1.18106	-1.23418	-0.832004	-1.20418	-1.59504	0.00607386	0.0106555	0.00114143	0.00135008	0.014011	0.00110333	6.12423e-05
YJR073C	OPI3	#NAME?	#NAME?	#NAME?	#NAME?	#NAME?	#NAME?	#NAME?	NA	NA	NA	NA	NA	NA	NA	-10.8684	-10.4647	-11.1105	-9.48619	-9.82594	-9.12638	-12.9984	0.0448713	0.0300799	0.04114	0.0276788	0.0339078	0.0437979	0.0353222
YJR074W	MOG1	-0.949898	-1.41509	-1.40084	-1.78233	-1.59183	-1.09652	-1.66198	0.589818	0.323706	0.254506	0.290956	0.349308	0.391918	0.265509	-0.949898	-1.41509	-1.40084	-1.78233	-1.59183	-1.09652	-1.66198	0.589818	0.323706	0.254506	0.290956	0.349308	0.391918	0.265509
YJR075W	HOC1	0.186197	-0.204582	-0.367294	-0.695382	1.42777	0.112694	-0.433723	0.816074	0.804117	0.599136	0.299233	0.0312178	0.898666	0.479553	0.186197	-0.204582	-0.367294	-0.695382	1.42777	0.112694	-0.433723	0.816074	0.804117	0.599136	0.299233	0.0312178	0.898666	0.479553
YJR076C	CDC11	-0.887341	-0.387261	-0.897138	-1.00987	-0.453317	-0.746663	-1.3731	0.0374183	0.385971	0.0301339	0.0203396	0.285679	0.0757033	0.0013644	-0.887341	-0.387261	-0.897138	-1.00987	-0.453317	-0.746663	-1.3731	0.0374183	0.385971	0.0301339	0.0203396	0.285679	0.0757033	0.0013644
YJR077C	MIR1	-1.22423	-1.36668	-0.659579	-0.761101	-0.652265	1.72075	-0.72368	0.00115321	0.000743427	0.0409294	0.0248979	0.0470732	3.9133e-05	0.0188245	-1.22423	-1.36668	-0.659579	-0.761101	-0.652265	1.72075	-0.72368	0.00115321	0.000743427	0.0409294	0.0248979	0.0470732	3.9133e-05	0.0188245
YJR082C	EAF6	0.582806	-0.102655	-0.0680967	-0.441772	NA	NA	-0.857412	0.621944	0.943921	0.959974	0.726053	NA	NA	0.41102	0.582806	-0.102655	-0.0680967	-0.441772	NA	NA	-0.857412	0.621944	0.943921	0.959974	0.726053	NA	NA	0.41102
YJR085C	YJR085C	#NAME?	0.528704	1.14962	#NAME?	0.00816483	0.631032	-0.0489353	NA	0.453795	0.101338	NA	0.989559	0.222271	0.924648	-8.86005	0.528704	1.14962	-7.47783	0.00816483	0.631032	-0.0489353	0.0480507	0.453795	0.101338	0.0296875	0.989559	0.222271	0.924648
YJR086W	STE18	0.0243417	-0.370408	-0.763422	-0.567333	0.165687	-1.039	-1.26529	0.972004	0.491342	0.114994	0.314687	0.76945	0.0638343	0.00864575	0.0243417	-0.370408	-0.763422	-0.567333	0.165687	-1.039	-1.26529	0.972004	0.491342	0.114994	0.314687	0.76945	0.0638343	0.00864575
YJR088C	EMC2	-0.183733	-0.116127	-1.28342	-0.425991	-0.0138346	-0.195311	-1.12537	0.897198	0.941139	0.249468	0.74147	0.990425	0.8975	0.329366	-0.183733	-0.116127	-1.28342	-0.425991	-0.0138346	-0.195311	-1.12537	0.897198	0.941139	0.249468	0.74147	0.990425	0.8975	0.329366
YJR092W	BUD4	#NAME?	-0.326599	-0.667131	#NAME?	-0.346144	-0.1012	-0.628664	NA	0.113763	0.033413	NA	0.132904	0.518513	0.0260997	-8.82489	-0.326599	-0.667131	-7.44267	-0.346144	-0.1012	-0.628664	0.0196998	0.113763	0.033413	0.0328608	0.132904	0.518513	0.0260997
YJR093C	FIP1	-0.0367788	#NAME?	0.275227	-0.0245574	0.119554	-0.155351	0.2423	0.881662	NA	0.205496	0.924821	0.600773	0.467352	0.321177	-0.0367788	-6.83906	0.275227	-0.0245574	0.119554	-0.155351	0.2423	0.881662	0.0190665	0.205496	0.924821	0.600773	0.467352	0.321177
YJR096W	YJR096W	0.0776673	-0.0807845	4.30074	0.142039	-0.37169	1.62827	0.983182	0.955044	0.94414	7.52654e-05	0.895937	0.680001	0.055501	0.19518	0.0776673	-0.0807845	4.30074	0.142039	-0.37169	1.62827	0.983182	0.955044	0.94414	7.52654e-05	0.895937	0.680001	0.055501	0.19518
YJR099W	YUH1	-0.693263	-0.642386	0.0130335	-0.336661	-0.0303938	-0.300487	-0.540017	0.223587	0.266065	0.984851	0.567606	0.957626	0.635563	0.27888	-0.693263	-0.642386	0.0130335	-0.336661	-0.0303938	-0.300487	-0.540017	0.223587	0.266065	0.984851	0.567606	0.957626	0.635563	0.27888
YJR101W	RSM26	-0.164562	0.026041	0.338694	-0.564261	-0.102327	0.627629	-0.169631	0.852764	0.977662	0.657114	0.446298	0.903547	0.401039	0.819381	-0.164562	0.026041	0.338694	-0.564261	-0.102327	0.627629	-0.169631	0.852764	0.977662	0.657114	0.446298	0.903547	0.401039	0.819381
YJR103W	URA8	-1.58233	-1.21416	-0.329864	-0.745174	-1.72651	0.288983	-1.81544	0.0179454	0.0725199	0.630453	0.251572	0.0098678	0.701865	0.0039868	-1.58233	-1.21416	-0.329864	-0.745174	-1.72651	0.288983	-1.81544	0.0179454	0.0725199	0.630453	0.251572	0.0098678	0.701865	0.0039868
YJR104C	SOD1	-0.429414	-0.147385	0.852341	-0.0554777	-0.259383	1.04293	0.590134	0.197765	0.700274	0.00964564	0.894725	0.43881	0.00279453	0.044716	-0.429414	-0.147385	0.852341	-0.0554777	-0.259383	1.04293	0.590134	0.197765	0.700274	0.00964564	0.894725	0.43881	0.00279453	0.044716
YJR105W	ADO1	-0.379975	-0.358501	-0.243363	-0.760579	-0.600401	-0.109431	-0.570202	0.222083	0.254591	0.424906	0.0159545	0.0457522	0.767321	0.0374092	-0.379975	-0.358501	-0.243363	-0.760579	-0.600401	-0.109431	-0.570202	0.222083	0.254591	0.424906	0.0159545	0.0457522	0.767321	0.0374092
YJR109C	CPA2	-0.146859	0.72911	-0.311584	3.19847	1.64953	0.138021	0.919977	0.566841	0.00526972	0.166433	7.7698e-10	2.02813e-06	0.597034	0.000305953	-0.146859	0.72911	-0.311584	3.19847	1.64953	0.138021	0.919977	0.566841	0.00526972	0.166433	7.7698e-10	2.02813e-06	0.597034	0.000305953
YJR113C	RSM7	-0.920663	-0.793117	-0.442862	-0.716927	-1.36319	-0.243205	-0.966243	0.19277	0.269893	0.532896	0.303053	0.0472971	0.772456	0.160784	-0.920663	-0.793117	-0.442862	-0.716927	-1.36319	-0.243205	-0.966243	0.19277	0.269893	0.532896	0.303053	0.0472971	0.772456	0.160784
YJR117W	STE24	-0.187801	-0.125012	-1.16023	-0.64894	0.188768	-0.644718	-1.1392	0.802214	0.878429	0.0923644	0.310737	0.789859	0.32138	0.155296	-0.187801	-0.125012	-1.16023	-0.64894	0.188768	-0.644718	-1.1392	0.802214	0.878429	0.0923644	0.310737	0.789859	0.32138	0.155296
YJR121W	ATP2	-1.46659	-0.714235	0.525729	-0.351718	-1.32433	2.10715	0.80446	2.9535e-06	0.00326372	0.0138596	0.0962751	8.59488e-06	2.95419e-08	0.000431609	-1.46659	-0.714235	0.525729	-0.351718	-1.32433	2.10715	0.80446	2.9535e-06	0.00326372	0.0138596	0.0962751	8.59488e-06	2.95419e-08	0.000431609
YJR122W	IBA57	Inf	NA	NA	NA	NA	NA	NA	NA	NA	NA	NA	NA	NA	NA	8.55116	NA	NA	NA	NA	NA	NA	0.020611	NA	NA	NA	NA	NA	NA
YJR123W	RPS5	-0.209236	-0.35464	-0.40388	-0.225896	-0.376175	-0.732858	-0.641638	0.148176	0.0194548	0.0056034	0.10909	0.00999194	4.01763e-05	0.000101462	-0.209236	-0.35464	-0.40388	-0.225896	-0.376175	-0.732858	-0.641638	0.148176	0.0194548	0.0056034	0.10909	0.00999194	4.01763e-05	0.000101462
YJR125C	ENT3	-1.24214	-0.92926	-0.0768092	-0.603063	-1.54962	-1.04489	-1.64144	0.00178109	0.0158676	0.850236	0.0891888	0.000271822	0.00552377	9.20329e-05	-1.24214	-0.92926	-0.0768092	-0.603063	-1.54962	-1.04489	-1.64144	0.00178109	0.0158676	0.850236	0.0891888	0.000271822	0.00552377	9.20329e-05
YJR130C	STR2	0.549551	1.27366	0.420433	0.35991	0.477857	1.30972	1.03755	0.322287	0.0444652	0.438132	0.519469	0.429042	0.0196972	0.0363232	0.549551	1.27366	0.420433	0.35991	0.477857	1.30972	1.03755	0.322287	0.0444652	0.438132	0.519469	0.429042	0.0196972	0.0363232
YJR131W	MNS1	-0.977378	-0.486923	-0.556621	-1.16727	-0.805061	-0.787594	#NAME?	0.0669561	0.376887	0.27218	0.0492704	0.121094	0.132577	NA	-0.977378	-0.486923	-0.556621	-1.16727	-0.805061	-0.787594	-14.7008	0.0669561	0.376887	0.27218	0.0492704	0.121094	0.132577	0.0364636
YJR132W	NMD5	0.471032	0.163871	-0.505974	#NAME?	-0.0366325	#NAME?	#NAME?	0.610183	0.862671	0.653038	NA	0.965476	NA	NA	0.471032	0.163871	-0.505974	-9.60191	-0.0366325	-9.2421	-13.1141	0.610183	0.862671	0.653038	0.0342616	0.965476	0.0303271	0.0210491
YJR133W	XPT1	-0.812356	-0.567487	-0.60226	-0.580505	-0.290052	0.34987	-1.32749	0.0687723	0.215332	0.158793	0.184898	0.532317	0.45767	0.00245355	-0.812356	-0.567487	-0.60226	-0.580505	-0.290052	0.34987	-1.32749	0.0687723	0.215332	0.158793	0.184898	0.532317	0.45767	0.00245355
YJR134C	SGM1	1.92896	0.630459	0.819278	1.65877	0.833912	1.05582	1.47232	0.154327	0.686378	0.550629	0.208867	0.549793	0.456256	0.214688	1.92896	0.630459	0.819278	1.65877	0.833912	1.05582	1.47232	0.154327	0.686378	0.550629	0.208867	0.549793	0.456256	0.214688
YJR135W-A	TIM8	-0.618184	-0.218991	0.0158181	-0.246956	-0.273302	0.371555	-0.182974	0.070573	0.558647	0.971702	0.483485	0.432659	0.285386	0.567495	-0.618184	-0.218991	0.0158181	-0.246956	-0.273302	0.371555	-0.182974	0.070573	0.558647	0.971702	0.483485	0.432659	0.285386	0.567495
YJR137C	MET5	-0.105023	-0.0424766	0.92844	1.21806	4.71758	-0.139683	0.653289	0.840268	0.942512	0.0263611	0.00747786	9.49726e-09	0.790624	0.0841711	-0.105023	-0.0424766	0.92844	1.21806	4.71758	-0.139683	0.653289	0.840268	0.942512	0.0263611	0.00747786	9.49726e-09	0.790624	0.0841711
YJR139C	HOM6	-0.390247	-0.294586	-0.352994	-0.0987159	0.118376	0.0559398	-0.403779	0.0735058	0.186088	0.0906948	0.678173	0.602081	0.835942	0.0390598	-0.390247	-0.294586	-0.352994	-0.0987159	0.118376	0.0559398	-0.403779	0.0735058	0.186088	0.0906948	0.678173	0.602081	0.835942	0.0390598
YJR143C	PMT4	0.596655	-0.144467	-0.947815	-1.12946	0.540236	-1.27208	-1.71731	0.520712	0.902754	0.257268	0.183318	0.548879	0.137416	0.0279677	0.596655	-0.144467	-0.947815	-1.12946	0.540236	-1.27208	-1.71731	0.520712	0.902754	0.257268	0.183318	0.548879	0.137416	0.0279677
YJR144W	MGM101	-1.22158	-0.932593	0.180312	-0.568044	-0.958424	0.304259	-0.0983044	0.00110498	0.00936909	0.601292	0.0813919	0.00547928	0.371835	0.767197	-1.22158	-0.932593	0.180312	-0.568044	-0.958424	0.304259	-0.0983044	0.00110498	0.00936909	0.601292	0.0813919	0.00547928	0.371835	0.767197
YJR148W	BAT2	-0.0021566	2.15942	0.750427	0.672547	0.824827	0.537567	0.86465	0.997753	7.37049e-05	0.0541013	0.09152	0.0389236	0.181859	0.0200848	-0.0021566	2.15942	0.750427	0.672547	0.824827	0.537567	0.86465	0.997753	7.37049e-05	0.0541013	0.09152	0.0389236	0.181859	0.0200848
YKL001C	MET14	0.344906	0.466615	0.601351	-0.0940236	5.01982	-1.33237	0.277007	0.806812	0.739091	0.632058	0.95667	0.00043557	0.329456	0.821308	0.344906	0.466615	0.601351	-0.0940236	5.01982	-1.33237	0.277007	0.806812	0.739091	0.632058	0.95667	0.00043557	0.329456	0.821308
YKL002W	DID4	-0.967732	-0.903368	-0.45922	-0.961501	-0.719911	-0.514328	#NAME?	0.235048	0.269612	0.455873	0.122558	0.355675	0.424122	NA	-0.967732	-0.903368	-0.45922	-0.961501	-0.719911	-0.514328	-12.1732	0.235048	0.269612	0.455873	0.122558	0.355675	0.424122	0.0175614
YKL005C	BYE1	-0.197497	-0.672478	0.00812421	0.054311	0.0385511	-0.138268	-0.288166	0.778409	0.232611	0.989454	0.9486	0.951689	0.835942	0.612563	-0.197497	-0.672478	0.00812421	0.054311	0.0385511	-0.138268	-0.288166	0.778409	0.232611	0.989454	0.9486	0.951689	0.835942	0.612563
YKL006C-A	SFT1	-0.302562	-0.228467	-0.892296	0.118956	-1.29885	-0.166998	-1.93603	0.673183	0.73128	0.114994	0.880975	0.049309	0.815384	0.0154644	-0.302562	-0.228467	-0.892296	0.118956	-1.29885	-0.166998	-1.93603	0.673183	0.73128	0.114994	0.880975	0.049309	0.815384	0.0154644
YKL006W	RPL14A	0.402217	-0.227075	-1.89515	-0.50929	-0.120306	-0.65999	-0.60129	0.73591	0.862303	0.0557187	0.647051	0.921151	0.557088	0.529663	0.402217	-0.227075	-1.89515	-0.50929	-0.120306	-0.65999	-0.60129	0.73591	0.862303	0.0557187	0.647051	0.921151	0.557088	0.529663
YKL007W	CAP1	-1.11426	-0.530549	-0.546659	-0.598741	-0.499662	-0.166369	-0.920923	0.00115321	0.0888302	0.0615608	0.0482657	0.0941415	0.628566	0.00220941	-1.11426	-0.530549	-0.546659	-0.598741	-0.499662	-0.166369	-0.920923	0.00115321	0.0888302	0.0615608	0.0482657	0.0941415	0.628566	0.00220941
YKL008C	LAC1	-0.0434911	0.121063	-0.006964	-0.471556	0.938362	-0.165201	0.0260525	0.945828	0.85365	0.989454	0.316824	0.0475291	0.769034	0.970957	-0.0434911	0.121063	-0.006964	-0.471556	0.938362	-0.165201	0.0260525	0.945828	0.85365	0.989454	0.316824	0.0475291	0.769034	0.970957
YKL009W	MRT4	0.173783	-0.242622	-0.658387	-0.885872	0.697023	-0.668552	-1.09365	0.632449	0.496264	0.0394256	0.010951	0.0330834	0.0418611	0.00117979	0.173783	-0.242622	-0.658387	-0.885872	0.697023	-0.668552	-1.09365	0.632449	0.496264	0.0394256	0.010951	0.0330834	0.0418611	0.00117979
YKL010C	UFD4	-0.635895	0.0585584	-0.501034	-0.240451	0.504339	0.0330933	-1.01142	0.427371	0.954996	0.519058	0.783098	0.525606	0.975156	0.172733	-0.635895	0.0585584	-0.501034	-0.240451	0.504339	0.0330933	-1.01142	0.427371	0.954996	0.519058	0.783098	0.525606	0.975156	0.172733
YKL013C	ARC19	-1.05317	-0.284205	-0.116888	-0.289848	-0.641184	0.0910972	-0.987503	0.0134355	0.528287	0.792964	0.499022	0.114589	0.861258	0.0109075	-1.05317	-0.284205	-0.116888	-0.289848	-0.641184	0.0910972	-0.987503	0.0134355	0.528287	0.792964	0.499022	0.114589	0.861258	0.0109075
YKL014C	URB1	-0.449176	-1.20326	-0.720598	-0.974613	0.796362	-0.769565	-0.38325	0.608863	0.111634	0.306737	0.349316	0.275063	0.355304	0.614705	-0.449176	-1.20326	-0.720598	-0.974613	0.796362	-0.769565	-0.38325	0.608863	0.111634	0.306737	0.349316	0.275063	0.355304	0.614705
YKL016C	ATP7	-1.15869	-1.52236	0.741182	0.00367584	-1.02901	1.97264	1.62623	0.000905146	0.000148214	0.014793	0.992142	0.00198483	3.34369e-06	2.4038e-05	-1.15869	-1.52236	0.741182	0.00367584	-1.02901	1.97264	1.62623	0.000905146	0.000148214	0.014793	0.992142	0.00198483	3.34369e-06	2.4038e-05
YKL018W	SWD2	0.194875	-0.361647	-0.253924	-1.35373	0.345695	-0.587267	-1.4333	0.765374	0.558647	0.671162	0.0339786	0.554256	0.306841	0.00777469	0.194875	-0.361647	-0.253924	-1.35373	0.345695	-0.587267	-1.4333	0.765374	0.558647	0.671162	0.0339786	0.554256	0.306841	0.00777469
YKL019W	RAM2	#NAME?	-0.527296	#NAME?	-0.178573	-0.275139	-0.660118	#NAME?	NA	0.442094	NA	0.830792	0.682108	0.319934	NA	-11.2667	-0.527296	-11.5088	-0.178573	-0.275139	-0.660118	-13.3967	0.0135254	0.442094	0.0330546	0.830792	0.682108	0.319934	0.0309528
YKL021C	MAK11	-0.710508	-1.18484	-1.79725	-1.39648	-0.117088	-1.39305	-2.0518	0.137458	0.0194548	0.000732721	0.00659617	0.829651	0.00545704	0.000382427	-0.710508	-1.18484	-1.79725	-1.39648	-0.117088	-1.39305	-2.0518	0.137458	0.0194548	0.000732721	0.00659617	0.829651	0.00545704	0.000382427
YKL024C	URA6	0.314799	0.0351086	-0.133781	-0.275201	0.25762	-0.621687	-0.321291	0.153476	0.907085	0.550617	0.199063	0.239283	0.00607382	0.0955061	0.314799	0.0351086	-0.133781	-0.275201	0.25762	-0.621687	-0.321291	0.153476	0.907085	0.550617	0.199063	0.239283	0.00607382	0.0955061
YKL025C	PAN3	#NAME?	#NAME?	-0.263737	#NAME?	-0.165561	-0.242505	-0.467019	NA	NA	0.734032	NA	0.840655	0.72896	0.516472	-9.32049	-8.91676	-0.263737	-7.93827	-0.165561	-0.242505	-0.467019	0.0239889	0.030891	0.734032	0.0440018	0.840655	0.72896	0.516472
YKL027W	TCD2	-0.211744	-0.852026	-1.19246	-0.594704	-0.126428	-0.209964	-1.51595	0.626689	0.0432944	0.00441425	0.12835	0.775625	0.640312	0.00557487	-0.211744	-0.852026	-1.19246	-0.594704	-0.126428	-0.209964	-1.51595	0.626689	0.0432944	0.00441425	0.12835	0.775625	0.640312	0.00557487
YKL028W	TFA1	1.15394	0.681122	-0.786034	-0.0131916	-0.120953	0.279266	0.16898	0.259262	0.481516	0.435147	0.991328	0.90932	0.801112	0.871808	1.15394	0.681122	-0.786034	-0.0131916	-0.120953	0.279266	0.16898	0.259262	0.481516	0.435147	0.991328	0.90932	0.801112	0.871808
YKL029C	MAE1	-0.0519709	-0.757823	-1.19266	-0.283081	0.452914	-2.1938	-0.325714	0.870325	0.00695684	0.000110063	0.262641	0.0697954	1.18283e-07	0.149395	-0.0519709	-0.757823	-1.19266	-0.283081	0.452914	-2.1938	-0.325714	0.870325	0.00695684	0.000110063	0.262641	0.0697954	1.18283e-07	0.149395
YKL032C	IXR1	-0.537691	-0.0486867	-0.620466	-0.663976	-0.361735	#NAME?	-0.377539	0.383139	0.939323	0.287437	0.168795	0.399613	NA	0.371796	-0.537691	-0.0486867	-0.620466	-0.663976	-0.361735	-10.9615	-0.377539	0.383139	0.939323	0.287437	0.168795	0.399613	0.0475329	0.371796
YKL033W-A	YKL033W-A	-0.215804	0.142493	-0.151461	0.650947	0.402318	0.0080466	-0.0297159	0.605827	0.753197	0.710557	0.0851938	0.297104	0.988076	0.944133	-0.215804	0.142493	-0.151461	0.650947	0.402318	0.0080466	-0.0297159	0.605827	0.753197	0.710557	0.0851938	0.297104	0.988076	0.944133
YKL035W	UGP1	-1.75109	-0.862356	1.08408	-0.120034	-1.19384	-0.519224	-0.756244	3.70646e-07	0.000896997	6.42934e-05	0.603351	2.69977e-05	0.0185737	0.000813308	-1.75109	-0.862356	1.08408	-0.120034	-1.19384	-0.519224	-0.756244	3.70646e-07	0.000896997	6.42934e-05	0.603351	2.69977e-05	0.0185737	0.000813308
YKL038W	RGT1	-0.461072	-0.944974	-0.692334	-0.551966	-0.656411	-1.33718	-1.33286	0.240334	0.0207299	0.0614482	0.143344	0.0814514	0.00147208	0.000828319	-0.461072	-0.944974	-0.692334	-0.551966	-0.656411	-1.33718	-1.33286	0.240334	0.0207299	0.0614482	0.143344	0.0814514	0.00147208	0.000828319
YKL039W	PTM1	-0.0309208	0.876826	0.619174	#NAME?	0.277657	-0.924099	#NAME?	0.963524	0.290862	0.370941	NA	0.659798	0.261495	NA	-0.0309208	0.876826	0.619174	-6.02926	0.277657	-0.924099	-9.54143	0.963524	0.290862	0.370941	0.041945	0.659798	0.261495	0.0191008
YKL040C	NFU1	-0.327629	-0.850972	-0.203104	-0.197164	0.0475427	0.219764	-0.688681	0.427602	0.039609	0.620834	0.641425	0.91861	0.617858	0.0494657	-0.327629	-0.850972	-0.203104	-0.197164	0.0475427	0.219764	-0.688681	0.427602	0.039609	0.620834	0.641425	0.91861	0.617858	0.0494657
YKL041W	VPS24	-0.598002	-0.355039	0.183199	0.0208756	0.134665	0.909716	-0.146713	0.289669	0.55775	0.723661	0.98016	0.80697	0.194578	0.763195	-0.598002	-0.355039	0.183199	0.0208756	0.134665	0.909716	-0.146713	0.289669	0.55775	0.723661	0.98016	0.80697	0.194578	0.763195
YKL046C	DCW1	-0.0288275	-0.207272	-0.323443	#NAME?	0.479598	1.13166	-0.428565	0.979024	0.845491	0.714171	NA	0.539416	0.139153	0.586818	-0.0288275	-0.207272	-0.323443	-12.3911	0.479598	1.13166	-0.428565	0.979024	0.845491	0.714171	0.0374061	0.539416	0.139153	0.586818
YKL053C-A	MDM35	#NAME?	#NAME?	0.325115	#NAME?	0.771655	0.186927	#NAME?	NA	NA	0.47447	NA	0.228853	0.701865	NA	-7.84769	-7.44396	0.325115	-6.46547	0.771655	0.186927	-9.97763	0.0236408	0.04923	0.47447	0.0390867	0.228853	0.701865	0.0215351
YKL054C	DEF1	-0.948687	-1.55225	-1.13127	-1.15509	-0.0887219	-1.24145	-1.60091	0.0661688	0.0063892	0.0249873	0.0268249	0.881174	0.0171237	0.00178069	-0.948687	-1.55225	-1.13127	-1.15509	-0.0887219	-1.24145	-1.60091	0.0661688	0.0063892	0.0249873	0.0268249	0.881174	0.0171237	0.00178069
YKL056C	TMA19	-0.00355776	-0.264549	-0.190842	-0.137219	0.785725	-0.212369	-0.108415	0.99039	0.225133	0.361027	0.532565	0.000976227	0.326409	0.588916	-0.00355776	-0.264549	-0.190842	-0.137219	0.785725	-0.212369	-0.108415	0.99039	0.225133	0.361027	0.532565	0.000976227	0.326409	0.588916
YKL057C	NUP120	0.0948488	0.898278	0.349296	0.336333	0.363803	1.11172	1.91863	0.893895	0.129735	0.558981	0.584279	0.548879	0.0553286	0.00134164	0.0948488	0.898278	0.349296	0.336333	0.363803	1.11172	1.91863	0.893895	0.129735	0.558981	0.584279	0.548879	0.0553286	0.00134164
YKL058W	TOA2	-0.415166	-1.13074	-1.01341	-0.913016	-0.686093	-0.960557	-0.719849	0.548546	0.0859674	0.139211	0.145404	0.283339	0.130264	0.204174	-0.415166	-1.13074	-1.01341	-0.913016	-0.686093	-0.960557	-0.719849	0.548546	0.0859674	0.139211	0.145404	0.283339	0.130264	0.204174
YKL059C	MPE1	-0.00291575	0.0265506	0.396282	0.0826581	-0.265226	0.00678023	0.229718	0.997753	0.971692	0.530187	0.934512	0.651862	0.995232	0.670053	-0.00291575	0.0265506	0.396282	0.0826581	-0.265226	0.00678023	0.229718	0.997753	0.971692	0.530187	0.934512	0.651862	0.995232	0.670053
YKL060C	FBA1	0.270183	0.073463	-0.259566	-0.378144	0.749321	0.489453	0.366291	0.246262	0.791935	0.241249	0.0935056	0.00241156	0.0317146	0.0713644	0.270183	0.073463	-0.259566	-0.378144	0.749321	0.489453	0.366291	0.246262	0.791935	0.241249	0.0935056	0.00241156	0.0317146	0.0713644
YKL062W	MSN4	#NAME?	-0.940624	-0.0208317	0.0871564	#NAME?	-0.231916	-0.246709	NA	0.219219	0.973341	0.891098	NA	0.723248	0.646623	-10.8288	-0.940624	-0.0208317	0.0871564	-9.78628	-0.231916	-0.246709	0.0371347	0.219219	0.973341	0.891098	0.0412724	0.723248	0.646623
YKL065C	YET1	-1.1649	0.357197	0.17926	-1.65126	-0.279039	0.927888	1.33332	0.392135	0.739091	0.87624	0.115655	0.787979	0.327946	0.254958	-1.1649	0.357197	0.17926	-1.65126	-0.279039	0.927888	1.33332	0.392135	0.739091	0.87624	0.115655	0.787979	0.327946	0.254958
[truncated: 1,436 more rows]
