# Supplementary material for: Genome-wide base editor screen identifies regulators of protein abundance in yeast
Source: bioRxiv preprint, doi:10.1101/2022.03.09.483657, version 1 (2022-03-09)
Supplement: Supplemental Table 6 [file 483657_file08.xlsx]

## Sheet: gRNAs
guide	set	geneSys	gene	TpreGal_log2fc	T00h_log2fc	T08h_log2fc	T24h_log2fc
ACCACCACCATTACAAATGG	eProvs	YPL028W	ERG10	0	-1.16967	-3.9298	-3.62634
CCACCAGACAAAGCAGAGAT	eProvs	YLR249W	YEF3	0	-2.09482	-3.28682	-3.60977
ATTTCCAGACAATTATGGTG	eProvs	YGR094W	VAS1	0	-0.898485	-2.0792	-3.48039
GACACCAAAAAACCTTACCA	eProvs	YDL102W	POL3	0	-1.60926	-4.32485	-3.38892
GCTTCTCGTCACGGTCAAAA	eProvs	YOR151C	RPB2	0	-2.87484	-3.68569	-3.38395
TGGTTCTACTAGAATTCCAA	eProvs	YJL034W	KAR2	0	-3.51279	-5.31496	-3.23872
TGGCACCTGGCCATTTATCA	eProvs	YOR341W	RPA190	0	-1.79948	-3.68108	-3.07817
TAGCACCAGAACAACCCAAT	eProvs	YPL028W	ERG10	0	-0.330128	-1.75428	-3.06949
ACACCACAATCGCTCATATT	eProvs	YIL031W	ULP2	0	-0.890909	-2.44732	-3.04918
ACCACCAGAAAGTTCCTGAC	neProvs	YKR001C	VPS1	0	-1.41538	-1.86558	-3.04172
AGTATCCAGAAGGTTCAGGT	eProvs	YGL245W	GUS1	0	-2.52116	-3.79551	-3.02787
ATATCATTGGGGTTTCTACT	eProvs	YIL003W	CFD1	0	-0.0643042	-1.358	-3.01581
GCCCTACCTATTCTAGTTGA	eProvs	YHR083W	SAM35	0	-0.288633	-0.838622	-2.96077
ACTCTCCCTAAGTTGATAAC	eProvs	YLR115W	CFT2	0	-1.9632	-3.71564	-2.93788
GTGCTCACCTTCACCTGGGA	eProvs	YOR048C	RAT1	0	-1.71431	-3.7362	-2.91631
CCTCCAGTAACCCTTCCGAG	eProvs	YGL022W	STT3	0	-1.25225	-2.52121	-2.91556
ACCACCAGATGCCAAGTTAC	eProvs	YBL030C	PET9	0	-1.01899	-1.31263	-2.91328
CCACCACCAGCATTACAATA	neProvs	YNL048W	ALG11	0	-1.48613	-3.12427	-2.89325
GGAGTACCGGTGGCAAATGG	eProvs	YBL076C	ILS1	0	-1.65649	-4.15103	-2.8897
TTCGTCTACTACATATTCGA	eProvs	YGL225W	VRG4	0	-1.29449	-3.14158	-2.88128
GAATCGCATTGTAAGTCTGT	neProvs	YGL148W	ARO2	0	-0.254632	-2.59369	-2.83223
ACATCACAGACTACTTGGCC	eProvs	YHR070W	TRM5	0	-0.159131	-1.16659	-2.82339
AAAGCTCTTTCGCTGGGACA	eProvs	YPL231W	FAS2	0	-2.08404	-3.50604	-2.80751
ATCTCCACAGGGACAAGGAT	neProvs	YBL071W-A	KTI11	0	-1.46809	-1.61862	-2.79517
TGTTCCTTCTAGAACTTTCA	eProvs	YER023W	PRO3	0	-0.0158518	-1.60318	-2.77415
GGGACCCAATGAAGTACGGA	eProvs	YDL143W	CCT4	0	-3.61811	-4.13811	-2.76546
AATACCTAGTGTCACATTAG	eProvs	YOR341W	RPA190	0	-1.90694	-4.13199	-2.75622
GCTTCCACGTTCGCTCACGA	eProvs	YPL175W	SPT14	0	-1.02044	-2.35991	-2.74313
AAGGACCTCTACCAGTGTAT	eProvs	YOL097C	WRS1	0	-1.70635	-3.04386	-2.73623
CCAACATGGTTGGCCTCTTC	eProvs	YJL167W	ERG20	0	-0.306493	-2.35388	-2.73345
CATTCCACCTACTTGATGAA	eProvs	YKL182W	FAS1	0	-2.54934	-3.75419	-2.72755
GTGGCACCTGGCCATTTATC	eProvs	YOR341W	RPA190	0	-1.10346	-2.80763	-2.72293
GTCCCCGTCTTAACACCTTG	neProvs	YCR066W	RAD18	0	-0.474881	-1.46313	-2.70877
GGGTACTAAAGGTTCCACAC	eProvs	YBR038W	CHS2	0	-3.43158	-4.62223	-2.70727
AGCACCGACGGCCATAGTGG	eProvs	YGL008C	PMA1	0	-3.45998	-4.40996	-2.68377
CAACCTACAGACCAACAGAA	eProvs	YGR029W	ERV1	0	-0.443827	-0.36442	-2.68049
AACACCCATTAGGAACGTTG	eProvs	YDL212W	SHR3	0	-0.602557	-1.60183	-2.68
TTTGGACCCAGCCACCGGAA	neProvs	YLR014C	PPR1	0	-1.58043	-2.48817	-2.6628
AATATCCATTGGGCTCCGGA	eProvs	YOR168W	GLN4	0	-2.12924	-3.64322	-2.64936
TGTTCGGCACTAACACAACG	eProvs	YLR229C	CDC42	0	-2.92983	-3.61722	-2.64241
ATGATCATTGTATATACCGT	eProvs	YDL008W	APC11	0	-0.99828	-3.25028	-2.6399
GATTCTCTGGTGGTTCTCAC	eProvs	YJR016C	ILV3	0	-1.45119	-2.79049	-2.63244
ATATCAAAATGCTATCATCG	neStops	YGL173C	XRN1	0	-0.914735	-1.49865	-2.62036
CTCACCTTCACCTGGGACGG	eProvs	YOR048C	RAT1	0	-2.00841	-3.71344	-2.61125
ACGCCATCTAATCTTCTAGG	eProvs	YNL181W	PBR1	0	-1.34828	-2.48914	-2.58504
CACCACAAGAACCAGGACCT	eProvs	YJR016C	ILV3	0	-0.916433	-2.91392	-2.57766
GCATTATCTCCTGATAGAGA	eProvs	YLR397C	AFG2	0	-0.851985	-1.97834	-2.56633
ACAGGTCGTGCAGCAAATGA	eProvs	YDR243C	PRP28	0	-0.288429	-2.17554	-2.54918
TACCTTTCCTTATATCTTAT	eProvs	YPR142C	YPR142C	0	-1.58003	-2.62148	-2.53763
CCCTCCAGTAACCCTTCCGA	eProvs	YGL022W	STT3	0	-0.648419	-1.33811	-2.53194
GGTGTCAAGATTACATCCAA	eProvs	YDR362C	TFC6	0	-0.31631	-1.81153	-2.53039
CTGCACCGTGAGGGCCGTAC	eProvs	YDR232W	HEM1	0	-0.0338666	-0.788189	-2.52478
GGTACCGTACAGAGTAACGG	eProvs	YHR019C	DED81	0	-2.40879	-3.76356	-2.5226
ACTCCAAGAATCTATTGTCT	neStops	YHR099W	TRA1	0	-1.13086	-2.43875	-2.52242
TCTCACGGTAAGGATGCTTG	eProvs	YDR023W	SES1	0	-1.82174	-3.04636	-2.49601
GAACCGTCGAAGTTCCATTC	eProvs	YPR035W	GLN1	0	-2.43084	-3.74831	-2.48858
ACTTCGGTCGTGGCCGGTTC	eProvs	YGR156W	PTI1	0	-0.989032	-2.15758	-2.48739
GGCACGTTTAGAAGCTTATA	eProvs	YLR045C	STU2	0	-1.23851	-2.35846	-2.48197
ATACCGTGCGTGATAGTACC	eProvs	YKL182W	FAS1	0	-2.85	-3.45276	-2.47536
CTAAACCTGTAATATGGGAG	eProvs	YPL235W	RVB2	0	-2.34281	-3.76424	-2.46025
CTGTCCCAGCTCTTGAATAT	eProvs	YGR083C	GCD2	0	-1.76003	-2.82996	-2.45355
ATTCAGTGCTTAGTATATAC	eProvs	YGL169W	SUA5	0	-0.563636	-1.48534	-2.44286
ATGGATCCTACGCACCAACA	eProvs	YJR006W	POL31	0	-1.25635	-2.15999	-2.44199
TTCTCACGGTAAGGATGCTT	eProvs	YDR023W	SES1	0	-1.80201	-3.5043	-2.43947
GCTCTATACTAGATTCTCTA	eProvs	YGL047W	ALG13	0	-0.197753	-0.500947	-2.43936
GTCCACAAAGTCAAAAACAA	neStops	YKL054C	DEF1	0	-0.786867	-1.61417	-2.43808
ACCTTCACCGAAAGTAACAA	eProvs	YGL055W	OLE1	0	-1.54673	-2.34101	-2.43361
TTACCGGACCACAAAGGTTT	eProvs	YDL140C	RPO21	0	-2.67142	-3.41516	-2.41728
CATCCATAACACTAAATTAC	eProvs	YNL221C	POP1	0	-0.25422	-1.24699	-2.41191
GATTCGGTCATGATAGATAC	eProvs	YNL102W	POL1	0	-3.08875	-4.60819	-2.41097
TCCCTCCAGTAACCCTTCCG	eProvs	YGL022W	STT3	0	-1.39129	-2.46962	-2.41095
AAACCACAAGGAGAACCATC	eProvs	YPR010C	RPA135	0	-0.758987	-3.1526	-2.40928
GAGATTCAATAGCCGTAAAT	eProvs	YBR256C	RIB5	0	-0.373406	-0.54956	-2.40747
ATCGTCAAACCAATCCTAAT	neStops	YER107C	GLE2	0	-0.514564	-1.55985	-2.40662
TAATCCATTTCGCTAAACTA	neStops	YKL181W	PRS1	0	-0.282037	-1.22465	-2.40649
AACACCAACAACGAATAGCG	eProvs	YML125C	PGA3	0	-1.39757	-2.81433	-2.40579
ACCTATCAAAAAACATGGTC	neStops	YGL038C	OCH1	0	-0.42274	-1.28771	-2.40242
ACTTCACCAACCTGGAGACA	eProvs	YJL019W	MPS3	0	-1.3658	-4.3305	-2.39768
GCACAAGTACCCAAATGCTC	eProvs	YJL111W	CCT7	0	-1.8943	-3.31562	-2.39156
ATGACCACCACCTCTACCAC	eProvs	YKL182W	FAS1	0	-2.06294	-3.20403	-2.38655
AAATCCCGCTACCAATGGGG	eProvs	YCL017C	NFS1	0	-0.626461	-1.94587	-2.38487
CTCCAGTAACCCTTCCGAGG	eProvs	YGL022W	STT3	0	-1.77294	-2.01765	-2.37949
GGCACCACCACCTGGGGACA	eProvs	YJL014W	CCT3	0	-3.59436	-3.20651	-2.3517
AGTACCACCATATACCATGA	eProvs	YJR016C	ILV3	0	-0.549618	-2.88484	-2.35075
ATCCATCGTATCGGTAGAAG	eProvs	YDR021W	FAL1	0	-0.292138	-2.16839	-2.34986
ATGACCGTAATGAGGAGTAC	eProvs	YBL076C	ILS1	0	-1.80165	-4.22862	-2.34664
TTACCGGTCCATAAGTAATA	eProvs	YOR116C	RPO31	0	-2.18632	-3.72898	-2.34487
GTTGCTCATTGTCAAGCTCA	eProvs	YMR220W	ERG8	0	-0.453684	-2.1502	-2.3279
AGTTCGCCTAACCCATACAT	eProvs	YER136W	GDI1	0	-0.356354	-1.90659	-2.32567
ACATCCTGCGGTTGCAAAAA	eProvs	YMR131C	RRB1	0	-1.02928	-1.62966	-2.32196
ATACTCATCGTCCCTTGAAT	eProvs	YLR195C	NMT1	0	-0.563262	-2.34834	-2.31728
ACTACCGATATCATGTCCCG	eProvs	YNR038W	DBP6	0	-0.551932	-1.08358	-2.31516
TCACACAATCTGTGATTAAC	eProvs	YDR339C	FCF1	0	-2.21518	-3.70999	-2.31271
AGTACAGTCGATCTGGGCCA	eProvs	YCL043C	PDI1	0	-0.558723	-1.63499	-2.30288
GTTGGTCGTACAGCAAGGGC	neProvs	YKR024C	DBP7	0	-0.657056	-1.24673	-2.2954
CACACCATTTGTTCCCATAA	eProvs	YHR072W	ERG7	0	-0.553494	-2.21239	-2.28366
AACACACCCATTCATGAAAG	eProvs	YNL256W	FOL1	0	-0.246557	-0.691672	-2.28282
GGACCTAATTCAATACGGAT	eProvs	YHR020W	YHR020W	0	-1.13607	-2.84969	-2.27923
AAATCCTTTATAGAAAGTAA	eProvs	YOR057W	SGT1	0	-0.667411	-1.50445	-2.27861
CCCAACCCAAATTGTCAGGA	eProvs	YNL247W	YNL247W	0	-1.18675	-2.3959	-2.27733
GTCCAATGATGCAGCCAATA	eProvs	YDR082W	STN1	0	-0.670081	-2.00168	-2.27504
TCTTCCATCAGATTTGGTAT	eProvs	YCL017C	NFS1	0	-0.47482	-1.22673	-2.27412
GATCCAGATAAAGATATCGT	eProvs	YER133W	GLC7	0	-1.68058	-2.99108	-2.26157
TGTACACCTCATTGCAGTGG	neProvs	YLR342W	FKS1	0	-0.873385	-1.19874	-2.24875
GTGGTTCAAGTATGTACCCA	eProvs	YDL029W	ARP2	0	-1.76362	-2.34357	-2.24323
ATGATACAACCACCTCAGCA	neStops	YBL093C	ROX3	0	-0.533196	-1.54013	-2.24297
GCACCTCCACCAAACGTCAC	eProvs	YGR094W	VAS1	0	-0.818721	-3.10925	-2.23889
ATTCAAAATCAAGTGCAGAG	neStops	YPL193W	RSA1	0	-0.0331726	-0.856922	-2.23864
CAATCTCTATACCCATTGAT	eProvs	YLR355C	ILV5	0	-1.51362	-2.97347	-2.23585
GTAAATCGTCAATAGTCCTA	neProvs	YOR089C	VPS21	0	-2.03651	-3.06882	-2.23241
TCTCCCACAAACACTGTGGC	eProvs	YBR243C	ALG7	0	-1.11805	-2.23873	-2.2322
GGGCTCCCAATGGGGTGATG	neStops	YNL220W	ADE12	0	-1.06101	-2.5365	-2.22907
GGGGTCTCACCATTCAGTCG	eProvs	YGL097W	SRM1	0	-2.38892	-3.14374	-2.22777
ATTCACCGGATAAGACACGA	neProvs	YER070W	RNR1	0	-3.07134	-4.66167	-2.22731
ACCACCTTTAACATCGGCTC	eProvs	YKL035W	UGP1	0	-0.725259	-2.27663	-2.22425
CGTCAGAACGAATTGTTCCA	neStops	YMR185W	RTP1	0	-0.30315	-1.36078	-2.20965
ACCACCTCTTGCCTTGGCAA	eProvs	YDL126C	CDC48	0	-1.99194	-3.14294	-2.20956
CCACCTCTTAGTTCACCGGT	eProvs	YNR016C	ACC1	0	-2.2065	-3.19359	-2.20373
AATACCACGGGACATGATAT	eProvs	YNR038W	DBP6	0	-0.885163	-2.46458	-2.19835
ACTCACACATACCGAACAGT	eProvs	YER094C	PUP3	0	-2.05365	-2.30635	-2.19767
TTTCCATCTCGTATGACTGT	eProvs	YOR207C	RET1	0	-0.864841	-2.47735	-2.19169
AGGGTACCAGATTCTAACAG	eProvs	YKL210W	UBA1	0	-0.813764	-2.16645	-2.19063
GTCACTGGTGCCTTACATAT	eProvs	YGR094W	VAS1	0	-0.591922	-2.13068	-2.18705
TTCAATACCGGAATAAGAAA	eProvs	YGR191W	HIP1	0	-2.83755	-2.88801	-2.18488
TGTTCCACCACCGCCAGAAG	eProvs	YLR355C	ILV5	0	-1.72438	-3.36415	-2.18182
ACGCCCACGACGGTGTGTAA	neStops	YAL021C	CCR4	0	-0.830813	-1.20502	-2.16887
ACTACTTTACAAAGACTCAA	eProvs	YLL031C	GPI13	0	-1.11833	-2.67605	-2.16326
GAAGGTCCAAGAGGTGCACC	eProvs	YJR016C	ILV3	0	-0.549394	-2.34794	-2.15941
ACCTTACGTTACCATAAAAG	eProvs	YPR085C	ASA1	0	-0.156349	-0.950062	-2.15669
ATCTTACAGAAGCAATTGAC	neStops	YOL072W	THP1	0	-1.05387	-2.16596	-2.15634
AAAACCGTTACGGGTAGTGG	eProvs	YPL231W	FAS2	0	-1.91896	-2.55867	-2.15015
AGTTCCAATAGCGTACCAAG	eProvs	YGL022W	STT3	0	-1.00517	-2.08965	-2.14912
AATACCGATGTTAACAACAT	eProvs	YBR196C	PGI1	0	-1.27135	-3.08101	-2.1438
TCGGTACAGATGGGTTCATT	eProvs	YHR188C	GPI16	0	-1.22851	-2.5857	-2.1383
TCCTCTGCTCTGATGGGTTA	eProvs	YJR016C	ILV3	0	-0.920962	-2.92812	-2.13374
ACCATTCCAAGGAAGCGTGA	eProvs	YPL043W	NOP4	0	-0.820221	-1.59879	-2.13209
AAAACTTTGACCAAATCACA	eProvs	YLL034C	RIX7	0	-0.50007	-1.8122	-2.12857
TGACCTCTGTATTTCAACCA	neProvs	YLR304C	ACO1	0	-1.45603	-1.83749	-2.12783
CGTTTCCAGAAATAGATATT	eProvs	YBL076C	ILS1	0	-0.619513	-1.65689	-2.12717
TCTGGTCGTGCAGGTCGTCG	eProvs	YJL050W	MTR4	0	-1.41012	-2.77447	-2.11316
GCTCTCCCTAAAGCAAAAAC	eProvs	YLR277C	YSH1	0	-1.74604	-3.2365	-2.1116
TCTTCTCCGATTAATCCAGA	neProvs	YBR019C	GAL10	0	-3.31447	-3.21467	-2.11068
ATACCACTTACCAGTCCAGA	neStops	YLR342W	FKS1	0	-1.32707	-1.94742	-2.10747
CTGATCCAGACGACTTGGGA	neStops	YBL027W	RPL19B	0	-2.46749	-2.83487	-2.10621
AAGTCCACGGTGTCGATAAA	neStops	YNL139C	THO2	0	-0.562307	-1.04222	-2.10582
TCTCCCAGTTTGCATTTACT	eProvs	YIL142W	CCT2	0	-1.7679	-2.41661	-2.1056
AGTTCTACCGGAAGAGTACA	eProvs	YFL039C	ACT1	0	-3.71398	-3.48405	-2.10027
GTTCCATTAAATGTTATCAC	eProvs	YOL130W	ALR1	0	-1.1947	-2.4146	-2.09868
CCTTCTGGGGCGCTTCACAT	neProvs	YLR382C	NAM2	0	-0.81083	-0.921539	-2.095
TGTTTCCACTTATTCAATGG	eProvs	YIL143C	SSL2	0	-1.87801	-2.92753	-2.09353
TATCACCTAGACCTAATATA	eProvs	YBR136W	MEC1	0	0.0146208	-0.418053	-2.09235
CTCCCAGAAGACCATATCTA	eProvs	YER036C	ARB1	0	-0.495572	-1.2866	-2.08977
AACCCAGTTAATCCAGGTAT	neStops	YHR099W	TRA1	0	-0.773891	-1.07855	-2.08654
ATTCCTGCGGAGCATCGCGA	eProvs	YDR081C	PDC2	0	-0.117451	-0.438663	-2.08557
CCACCACCGAAAGGTAAGTA	eProvs	YHR007C	ERG11	0	-1.33601	-2.16199	-2.08256
GGGTCCATGGCCACCGCGTT	eProvs	YMR296C	LCB1	0	-1.07212	-2.62773	-2.08047
TCGTTCCCACTCAATTGACG	neStops	YDR069C	DOA4	0	-0.981407	-1.91207	-2.07769
ATCACCGTAACCAGCAACAA	eProvs	YER043C	SAH1	0	-1.05294	-1.79746	-2.07269
GATACCACCATGGCCTGGGA	eProvs	YBR029C	CDS1	0	-1.76409	-3.66313	-2.072
GTCTCAAGCTCCAACTGAAT	neStops	YOR096W	RPS7A	0	-1.00368	-1.17802	-2.07098
AGATCCGGAATTAACCACCT	eProvs	YBR049C	REB1	0	0.0326337	-0.685352	-2.06802
GCACCAGTGACGTTTGGTGG	eProvs	YGR094W	VAS1	0	-0.589072	-1.91375	-2.06505
TTCCACCCATAGTAATCATT	eProvs	YLR086W	SMC4	0	-1.64867	-2.53625	-2.06478
CCGACCCTATATTGACTAGA	eProvs	YDR531W	CAB1	0	-0.109207	-1.22631	-2.06385
TATCTACAAAGCCTTTGCAC	eProvs	YAL041W	CDC24	0	-1.69389	-2.35907	-2.05744
CCAGATCAATCCGAGAAGGA	neStops	YAL024C	LTE1	0	-0.413906	-1.82576	-2.05563
TAAACCTGTAATATGGGAGT	eProvs	YPL235W	RVB2	0	-1.359	-3.12691	-2.05498
CTAGTCAGTTTATCACTGAA	neStops	YNL139C	THO2	0	-0.429974	-1.44912	-2.05104
GTATTTCCAGACAATTATGG	eProvs	YGR094W	VAS1	0	-1.71397	-1.35608	-2.05016
CACTCAGTAGCCGGAGGGAC	eProvs	YLR212C	TUB4	0	-1.9692	-4.16504	-2.04924
TCTATACCCATAATATGAAG	eProvs	YJL005W	CYR1	0	-1.15592	-1.37058	-2.04891
CATACAATATATGGGATCTA	eProvs	YPR176C	BET2	0	-0.698767	-2.13265	-2.04596
GGCGCACCTAATCTAGGCAA	eProvs	YJL008C	CCT8	0	-0.582194	-1.51093	-2.04574
TCCAACAGAATGGATAGGAA	eProvs	YBL076C	ILS1	0	-1.75261	-3.58186	-2.0449
TATCTCCCAGTTCTTCACCT	eProvs	YKL078W	DHR2	0	-0.969123	-2.47781	-2.04329
CTAGACAGTTTGAACAAAGA	eProvs	YDL102W	POL3	0	-0.526047	-1.86938	-2.04317
TCTACCTACTCTATGCACGT	eProvs	YLR276C	DBP9	0	-0.895401	-1.51855	-2.04241
GGTATTCGTGGAAAAGGTAT	neProvs	YJL127C	SPT10	0	-0.0751481	-1.29984	-2.0421
CACTCAAACGTCTACACCCA	neStops	YML013W	UBX2	0	-0.351851	-1.30627	-2.03809
GTTACAGATGGGACAACTCC	eProvs	YPR181C	SEC23	0	-2.63555	-2.65704	-2.03686
GTTCCCACAATCCCCCCGTC	eProvs	YDL205C	HEM3	0	-0.0894158	-0.580196	-2.03391
ATTCCACGGTACATCCACAA	eProvs	YPL231W	FAS2	0	-2.02581	-3.20532	-2.03383
TGGTACGGAGGATGCGGTGA	eProvs	YEL058W	PCM1	0	0.159427	-1.94132	-2.0337
GGCTCACCAACTGGTTATGG	neStops	YDL047W	SIT4	0	-1.27706	-1.55952	-2.03119
ACCACCAACGGCCAGACCAA	eProvs	YLL008W	DRS1	0	-0.922861	-1.86821	-2.03045
GAACCATCTGGTGTATGAAC	eProvs	YPR010C	RPA135	0	-1.22077	-2.0177	-2.02974
AGTCATGTGCAATGAACATG	eProvs	YDR182W	CDC1	0	-0.072637	-1.55608	-2.02929
TTGCCCAATATTGTTGGAGA	eProvs	YDR531W	CAB1	0	-0.542485	-1.992	-2.0262
TCACCCAATCAACCGCAGGT	neStops	YLR342W	FKS1	0	-1.45279	-1.77669	-2.02439
ATTACAAAGAATGAGGCTTA	neStops	YJR090C	GRR1	0	-0.910578	-1.57217	-2.02271
CCACTCTGACAACAAGGGTT	eProvs	YHR020W	YHR020W	0	-1.45208	-2.90549	-2.02184
TGGTACCTAACCCGTATGTA	eProvs	YPL160W	CDC60	0	-1.39707	-2.78424	-2.02081
TTTACCGGACCACAAAGGTT	eProvs	YDL140C	RPO21	0	-2.63616	-3.94151	-2.02005
ATTACAGAGGAAGAGAAGCA	neStops	YGR271C-A	EFG1	0	-0.563954	-1.26571	-2.01974
ACCATCCTCTATCCAATCAA	eProvs	YDR021W	FAL1	0	-0.537011	-1.95104	-2.01939
ACATTTCCACTAATGGGACC	eProvs	YPL153C	RAD53	0	-0.452397	-0.992932	-2.01915
TGGACCGATGGTACCAATGA	eProvs	YAL038W	CDC19	0	-0.950515	-2.33668	-2.01889
AGTGACCGTTGGCCTTGATT	eProvs	YJR016C	ILV3	0	-0.887449	-1.85784	-2.01688
GTGGTACGGAGGATGCGGTG	eProvs	YEL058W	PCM1	0	-0.152163	-1.81065	-2.01178
ATCACCACAGCGTATTATCG	eProvs	YFL005W	SEC4	0	-0.968603	-1.56545	-2.0087
GGGCCCTTTGCTGTACCTGC	eProvs	YHR070W	TRM5	0	-0.159815	-1.02236	-2.00657
ATTACAATTCTCATTAGAAC	eProvs	YAR007C	RFA1	0	-0.530429	-1.74534	-2.00625
TTTCTCAGTTGACTAAACGA	neStops	YGL163C	RAD54	0	-0.98748	-1.82381	-2.00249
TGGTCCCGGTCTACCGCTCG	eProvs	YMR108W	ILV2	0	-0.40605	-2.26992	-2.00209
GAATACCCATTCTAACTGAT	eProvs	YJL005W	CYR1	0	-1.22354	-1.97431	-2.0019
AGAACCATAATCCTCCTTTC	eProvs	YDR341C	YDR341C	0	-0.813406	-1.86861	-2.00166
GGAACTCTACCGTTGGTCAA	eProvs	YDL055C	PSA1	0	-0.811793	-1.79993	-1.99933
GTGCCTCTCATGATATGACT	eProvs	YPR178W	PRP4	0	0.0865221	-1.33377	-1.99908
GACCCCATATCACCATATCC	neStops	YMR224C	MRE11	0	0.124936	-0.534359	-1.99673
AATCACGTCTTCGATAGAGA	eProvs	YEL019C	MMS21	0	0.129653	-1.0112	-1.99661
AGGCCCGGTATCATAGTTGG	eProvs	YOL010W	RCL1	0	-0.691329	-2.12505	-1.99331
CCTCCCCAAACCTGTCACCC	eProvs	YPR176C	BET2	0	-0.51451	-1.72817	-1.98566
ACTCAATTATTGAACCATAA	neStops	YLR320W	MMS22	0	-0.567441	-1.32486	-1.98482
GTCAACTAGAGCCGGTGGTT	eProvs	YIL126W	STH1	0	-1.17168	-2.3018	-1.98278
ATTCGTTCACTGAAGATGGT	eProvs	YMR200W	ROT1	0	-2.2345	-2.89602	-1.98222
CGTTCTTGTGATATGGGGTT	eProvs	YOR074C	CDC21	0	-0.0936099	-1.94833	-1.97959
ACCCTGAGTGTGGTTCATTG	eProvs	YGL155W	CDC43	0	0.0461962	-1.15717	-1.97915
AACCCTTTAAGACCATATAT	eProvs	YHR164C	DNA2	0	-0.702898	-2.613	-1.96785
GTTCAGTTAGGCCTACCTGA	neStops	YMR060C	SAM37	0	-0.111697	-0.0712105	-1.96669
ACTCTTCTCAGTATAGAATG	eProvs	YPR025C	CCL1	0	-1.62524	-2.80792	-1.96488
CTGACCATGGGTCGACATCT	neStops	YOL072W	THP1	0	-0.988359	-1.68975	-1.96321
TGGTCAAGACAATACGACCT	neStops	YGR167W	CLC1	0	-1.51004	-2.97548	-1.96178
CAGTGCCGTAAGAGGAAGAT	eProvs	YDR303C	RSC3	0	-0.643115	-1.63155	-1.96026
CCTTCCGCTAGAATTGTGGT	eProvs	YOR341W	RPA190	0	-1.6907	-2.90261	-1.95511
CAGACCTCTACGGTTACCCG	eProvs	YPR016C	TIF6	0	-0.949931	-1.94431	-1.94965
TGCGGTTCACTGTATTTATG	eProvs	YMR113W	FOL3	0	-0.330678	-0.497379	-1.94898
AGGTCACTGGGCCAATTACA	eProvs	YIL078W	THS1	0	-1.51619	-2.77678	-1.94758
AACCATCTGGTGTATGAACA	eProvs	YPR010C	RPA135	0	-1.48292	-2.31845	-1.94502
ACTGTACGAGATTCAAATGG	neStops	YKL126W	YPK1	0	-0.303033	-1.1844	-1.94483
ATGACCAGGAGCATCCAATA	eProvs	YDR172W	SUP35	0	-1.82645	-2.54146	-1.94348
ATACCAGGAACCAATAAAGG	eProvs	YKL182W	FAS1	0	-2.72118	-2.86204	-1.94265
TGATCGAAGTCATCTTTCCA	neStops	YGR252W	GCN5	0	-0.793145	-1.51088	-1.94257
AACTTCACCAACCTGGAGAC	eProvs	YJL019W	MPS3	0	-0.959935	-2.41246	-1.94178
GCATTCGTCTGCCCACGTCT	eProvs	YIL078W	THS1	0	-1.25929	-2.64426	-1.93861
TTATCTGGTAACCCAATTCT	neProvs	YLR342W	FKS1	0	-1.01703	-1.00554	-1.93606
ATTTACCGTCACCAAGAATT	neProvs	YLR342W	FKS1	0	-1.77909	-2.45905	-1.93168
CAACCCTCGCTCCCCGACGA	eProvs	YMR301C	ATM1	0	0.121504	-0.526817	-1.92658
AGGACTGAATCTAAATTCAA	eProvs	YGR098C	ESP1	0	-2.24451	-3.11637	-1.92601
TGTACAGAGGTTCTCTCAAG	eProvs	YBR237W	PRP5	0	-0.234585	-1.01318	-1.91992
TCCTCACCATGATAACGAAT	eProvs	YNL247W	YNL247W	0	-1.05049	-1.83273	-1.91787
AAGCATCTGCAACCTTGGAT	eProvs	YBL097W	BRN1	0	-1.52693	-1.99486	-1.91719
CTTCCATACCAACTTCCATC	eProvs	YHR072W	ERG7	0	-0.520406	-2.02229	-1.91434
GTTTCCAGAAATAGATATTG	eProvs	YBL076C	ILS1	0	-0.487682	-1.72434	-1.91287
CCATTCTCGTGTGAGACGAG	eProvs	YLR316C	TAD3	0	-0.0633267	-1.08182	-1.90951
TTCACTCTCATGTGGGTGTC	eProvs	YDR331W	GPI8	0	-1.16699	-2.39609	-1.90789
TGCTCCTTGGCTAGACACTT	eProvs	YLR359W	ADE13	0	-0.815515	-1.26985	-1.9072
TGGCCTTCAGGAGTTTCTGC	eProvs	YOR151C	RPB2	0	-1.37354	-2.44506	-1.90677
GTGACTCGAAGTATACCGCG	neStops	YOR322C	LDB19	0	0.252879	-0.874351	-1.90648
TATCCTCTAGCAACAATAAC	eProvs	YJL087C	TRL1	0	-0.737899	-1.42576	-1.90388
AAATTACAAAATACGAACGG	neStops	YLR182W	SWI6	0	-1.4318	-1.43092	-1.90204
TTCTCCCAAAGTCGAGATGC	neStops	YBR036C	CSG2	0	-2.38491	-3.15255	-1.90093
TTATCATCATATAACTATTT	eProvs	YDR062W	LCB2	0	-0.97847	-2.3544	-1.89982
CTACCAGTGTATAGGAAAAA	eProvs	YOL097C	WRS1	0	-0.924524	-2.25047	-1.89525
CTCACAGGAAGATATTAGTC	neStops	YDR264C	AKR1	0	-0.964637	-0.823809	-1.89463
ATCCTACGCACCAACATGGT	eProvs	YJR006W	POL31	0	-0.556593	-1.78766	-1.89424
GAAACTTCCCACGGCAACAG	neProvs	YNL248C	RPA49	0	-0.891284	-1.53867	-1.88696
AATACCACGAGCTAAAACGT	eProvs	YGL171W	ROK1	0	-0.482162	-1.39133	-1.88603
GGACACCTACAGATAGAGAT	eProvs	YDL108W	KIN28	0	-1.15846	-1.70692	-1.88555
ATTGCACATGGAATCAAACA	eProvs	YOL097C	WRS1	0	-1.33414	-2.21131	-1.88544
GTCACAGATAAATGTCAAGT	eProvs	YGR175C	ERG1	0	-1.34668	-1.79687	-1.88476
CTTCACATAAGACTGGGATG	eProvs	YDL208W	NHP2	0	-0.758823	-1.56094	-1.8845
AATATCTTGGAAACACGATC	eProvs	YBL014C	RRN6	0	-0.690458	-1.6327	-1.87896
ATAACATCGAGAATCACTAA	neProvs	YML031C-A	YML031C-A	0	-3.033	-3.0012	-1.87512
CATTATCTCCTGATAGAGAC	eProvs	YLR397C	AFG2	0	-1.30743	-2.77487	-1.87113
AACCCTTCCGAGGGGGTACC	eProvs	YGL022W	STT3	0	-1.31414	-2.39741	-1.8669
CATATCTCCAACAAGAGAGT	eProvs	YJL033W	HCA4	0	-0.33115	-1.46547	-1.86239
TCAACTAGAGCCGGTGGTTT	eProvs	YIL126W	STH1	0	-0.838638	-1.91827	-1.86039
GGGTCAAGGCGCCATTGCCA	neStops	YGL106W	MLC1	0	-2.44746	-3.78488	-1.85594
ACCACAGACTGCGCATGATG	neStops	YCL061C	MRC1	0	-0.861832	-1.33244	-1.85519
TTCTACAGGTAAGACAGCAT	eProvs	YDR190C	RVB1	0	-0.978668	-2.16967	-1.85413
GATCCTCACGCCTATATAAG	eProvs	YER003C	PMI40	0	-0.0959545	-1.68314	-1.85385
GAATCCACACCAAGATTTAC	eProvs	YIL126W	STH1	0	-1.04645	-2.34228	-1.84934
ACCTACCATGATCAAATATA	eProvs	YFL022C	FRS2	0	-1.45433	-1.86792	-1.84844
TCTTCTAGACATGGTCAAAA	eProvs	YOR207C	RET1	0	-1.46699	-2.1865	-1.84761
TGCCCCAAAACCTGTGGCCA	eProvs	YFR050C	PRE4	0	-1.726	-2.2818	-1.84699
CTCCATATGTGGAAAGTCCA	neStops	YNL139C	THO2	0	-0.456563	-1.32662	-1.83721
TTCACCCATCCCAATTCCAC	neStops	YNL280C	ERG24	0	-0.676784	-1.68182	-1.83681
CTGTTCCTAAGTTATTTCGT	eProvs	YBR265W	TSC10	0	-0.227849	-1.40735	-1.83676
GTATTCTCTATTACCAACCA	eProvs	YMR128W	ECM16	0	-0.551199	-2.01078	-1.83613
GGTCTCCAAGTGGCGTACTC	neStops	YEL036C	ANP1	0	-1.00931	-1.57101	-1.83497
GCCACCGGTACTCCTCATTA	eProvs	YBL076C	ILS1	0	-1.16938	-2.79372	-1.83452
CCACATCCAATAACTGATAT	eProvs	YJL087C	TRL1	0	0.0558665	-1.19113	-1.83309
TCTTCCCAAGTATGGATATC	neStops	YCR094W	CDC50	0	-0.0608302	-1.73754	-1.83184
TACTCTATATCTAGCGGCCC	eProvs	YPR048W	TAH18	0	-0.286584	-1.21857	-1.82391
ATGACCAGCATGAAATGGCT	eProvs	YDR341C	YDR341C	0	-0.70019	-2.72177	-1.82286
AACACAACCGTTGGAAGCGT	eProvs	YJR016C	ILV3	0	-0.737358	-2.0058	-1.82267
GGCTCATACACAACAAATAT	eProvs	YJL081C	ARP4	0	-0.820748	-1.86398	-1.82262
AGATCAACCCTCTGTTGCCG	neStops	YNL248C	RPA49	0	-0.445511	-1.18406	-1.82223
GGTTTCCGATAACCAGTTGA	eProvs	YIL083C	CAB2	0	0.0121838	-0.952871	-1.81668
GTGATCCTGCGTCGATGTAT	eProvs	YHR024C	MAS2	0	-0.651807	-1.6366	-1.81586
CATCCACAGGGACATCAAGG	eProvs	YAR019C	CDC15	0	-1.05072	-1.65754	-1.81586
TAATCAGTACAAGGTCGTGT	neStops	YOR141C	ARP8	0	-0.00980279	-0.563279	-1.81081
GGCATACCTGGTGCACCTCT	eProvs	YJR016C	ILV3	0	-0.799508	-2.3118	-1.80993
ATGCTACTAAGGATTTAGAA	neProvs	YPR159W	KRE6	0	-2.59492	-3.07724	-1.80925
CCTTCCAACAGCATAAATTT	eProvs	YBL035C	POL12	0	-0.385456	-1.26044	-1.8083
ATATAACCCAATTGAGTGAA	eProvs	YNL221C	POP1	0	-0.330531	-1.29528	-1.80758
GTGCCCTTCAGTACCAACAG	neProvs	YMR202W	ERG2	0	-0.155198	-0.248865	-1.80295
CAATACCTGGACCAGGGAAA	neProvs	YMR217W	GUA1	0	-1.35502	-2.38124	-1.79707
GTACTATCAAAGTTACCTAT	eProvs	YJL111W	CCT7	0	-0.942549	-0.913525	-1.79484
ACTCCCCAAACCGGTGATGA	neStops	YMR125W	STO1	0	-0.404993	-0.784145	-1.7939
ACTTCCTCCTGGCGCTATAT	eProvs	YMR128W	ECM16	0	-0.171761	-0.834856	-1.79132
TATTCTCCCGTGGATCACCA	neProvs	YPL040C	ISM1	0	-0.544501	-0.575264	-1.7849
ACCCCATATCACAAGAACGT	eProvs	YOR074C	CDC21	0	-0.652438	-2.21471	-1.78204
TATCCTCTACCTTCATTGTT	eProvs	YOR335C	ALA1	0	-1.09003	-1.89496	-1.78154
ATTATTCAGGCCAGAAAACT	neStops	YHR005C	GPA1	0	-3.1675	-2.64287	-1.78078
CTCACATTGCCAGTAAGTTG	eProvs	YJL019W	MPS3	0	-1.20637	-2.23525	-1.78
GGATCGTGGCTACTATAGTC	neProvs	YDL047W	SIT4	0	-1.00908	-1.13192	-1.77867
ACCTTTCCAAATTATTAGAG	neStops	YOR141C	ARP8	0	0.146567	-0.469001	-1.77715
ACTACTAATGTCCTGGCCCG	eProvs	YOR046C	DBP5	0	-1.36621	-2.47303	-1.77516
AACACATAGTGCATCATGGA	eProvs	YDL143W	CCT4	0	-2.08244	-1.92715	-1.77438
CAATTCAAGACGAAAAGGTT	neStops	YMR185W	RTP1	0	-0.560774	-1.61345	-1.77438
GGCCCATAGAATAGAAGATG	eProvs	YNL290W	RFC3	0	-0.578545	-1.69625	-1.7739
ATGGTCAATTAATTCAATTA	neStops	YDR484W	VPS52	0	-1.07905	-2.26148	-1.77201
ATCCCTCAGGTTATCAGCGA	neStops	YLR420W	URA4	0	-0.417296	-1.66172	-1.77159
ATCACCTGCAACGTTACCTA	eProvs	YNL189W	SRP1	0	-0.962219	-2.12333	-1.76984
GCACCAACACCACAGTAGTA	eProvs	YPR035W	GLN1	0	-1.5713	-2.66127	-1.76878
ATCCAGTCCGGTACCGAGTT	neStops	YGL148W	ARO2	0	-0.236374	-1.57602	-1.76095
AATGTCCACGACTTATCATG	neProvs	YNL192W	CHS1	0	-0.765908	-1.54735	-1.75972
GACCTACATAGAGAATTAGG	eProvs	YOL097C	WRS1	0	-0.663017	-2.3176	-1.75794
GCTACTGATGTGGCCGCCAG	eProvs	YNL112W	DBP2	0	-0.300399	-0.821202	-1.75781
CCATCCACCAGACATATCTT	eProvs	YER036C	ARB1	0	-0.218815	-1.44389	-1.75753
TTCACCAATAAGGACGGTAA	eProvs	YKL078W	DHR2	0	-1.04679	-1.98434	-1.75751
TTTACAAAGCGACTATTTCA	neStops	YKL139W	CTK1	0	-0.137721	-0.264678	-1.75731
TCACCCTATCTATCATATCA	eProvs	YCL059C	KRR1	0	-0.891769	-1.87969	-1.75566
AACTCCTTGGCTCATTACAT	eProvs	YGL055W	OLE1	0	-0.551565	-2.35438	-1.7542
GGCGTCGCACAACCCATACC	eProvs	YEL058W	PCM1	0	0.0503386	-1.1416	-1.754
TGCTCAAAACACTGCTAGAG	neStops	YJR105W	ADO1	0	0.0374739	-0.619436	-1.75297
TCATCCATCGATAGAGGTTT	eProvs	YOR207C	RET1	0	-1.23009	-2.39292	-1.7519
CTGATCCAGACAACTTGGGA	neStops	YBR084C-A	RPL19A	0	-1.50837	-1.64145	-1.75046
CCCCCGCAAAAGCCAAATAA	eProvs	YDR047W	HEM12	0	0.0886423	-0.650414	-1.74654
AACCCTCCATTGCATTTACT	eProvs	YGL142C	GPI10	0	-0.165945	-0.680177	-1.74536
CATGCCATGGTTCCAGGTAA	neStops	YER070W	RNR1	0	-1.87138	-2.77838	-1.74486
CTTCCAGTTGAAGTCGTTAC	neStops	YBL016W	FUS3	0	-0.616582	-0.930482	-1.74332
TTCACCAAATGAGTGTACAA	eProvs	YDR362C	TFC6	0	0.0820681	-1.1184	-1.74236
ATGGTCACACCGGTACCATT	eProvs	YMR146C	TIF34	0	-1.43117	-2.55124	-1.74148
TCTGACTGCTATTGCCATCT	eProvs	YJL091C	GWT1	0	0.0897392	-0.859934	-1.73981
ACCAAATCCCGCTACCAATG	eProvs	YCL017C	NFS1	0	-0.191393	-1.1459	-1.73824
AAGCACCCAAACTTGTTCAG	eProvs	YDL103C	QRI1	0	-0.352617	-1.25165	-1.73725
CCATCTGATATGTGGTCATG	eProvs	YDL028C	MPS1	0	-1.40767	-1.79616	-1.73709
CACTCAACTACAAACTACAA	neStops	YDR159W	SAC3	0	-0.650229	-1.08394	-1.73587
TCTTCAAGACATAAATAAAA	neStops	YLR357W	RSC2	0	0.0550229	-0.87856	-1.73524
CACCATGGCCTGGGATGGAG	eProvs	YBR029C	CDS1	0	-1.21985	-2.1607	-1.73427
ACCGTCACCAGCAGCCTCAT	eProvs	YLR259C	HSP60	0	0.0270338	-0.690633	-1.73321
CAATCAACATTATTCAACCC	neStops	YGR188C	BUB1	0	0.296603	-0.168582	-1.72934
TAACACATAGTGCATCATGG	eProvs	YDL143W	CCT4	0	-1.62279	-2.00933	-1.72925
TAGCACATGCTGAGTTCATG	eProvs	YJL035C	TAD2	0	0.0109087	-0.0725563	-1.72917
GGTTGCCCTGCAAGGTGACA	eProvs	YDR047W	HEM12	0	0.110209	-0.238047	-1.72867
CTCCATCAAATAGATCACCT	eProvs	YDR182W	CDC1	0	-0.7876	-1.89149	-1.72581
AACCCACTTTGCAGCATACC	eProvs	YLR277C	YSH1	0	-0.794905	-1.98389	-1.7257
ATTGCCATTGCGTATTAACG	eProvs	YMR108W	ILV2	0	-0.0930198	-1.08694	-1.72565
CTGGTCGTGCTGGTCGTACA	eProvs	YGL120C	PRP43	0	-0.153203	-1.30255	-1.72483
ATGCCTCCGGTGGTGAAGAT	eProvs	YMR146C	TIF34	0	-1.38207	-2.18646	-1.72275
AAACCAATATCGTGATTACC	eProvs	YDR182W	CDC1	0	-0.485091	-0.473444	-1.72217
TCTTCTAGACACGGTCAAAA	eProvs	YPR010C	RPA135	0	-1.03653	-1.90411	-1.71731
CGTACAAAAACTATACAACA	neStops	YJL130C	URA2	0	-0.38645	-1.39368	-1.71719
ACGTCTGCAACCAATCAGTA	eProvs	YPR086W	SUA7	0	-0.631286	-1.10653	-1.71621
ACTGGTCGTGCCGGTAACAC	eProvs	YOR204W	DED1	0	-1.92212	-3.1302	-1.70703
TGACCCCGTTGTCCTGGTAT	eProvs	YEL058W	PCM1	0	0.162147	-0.76079	-1.70382
AATCCAATAGTTCTTATAGC	eProvs	YLR045C	STU2	0	-0.0994023	-0.88485	-1.69804
CACTCCCATATTACAGGTTT	eProvs	YPL235W	RVB2	0	-0.427747	-2.15563	-1.69456
AGCTCAACTATTAAGACAGT	neStops	YHR027C	RPN1	0	-1.52896	-3.0138	-1.69436
CCACTACACCAACAGACCCT	eProvs	YCL017C	NFS1	0	-0.19229	-1.23472	-1.69294
AGATTCAATAGCCGTAAATG	eProvs	YBR256C	RIB5	0	0.258133	-0.592308	-1.69281
TTCTGGGCCGACACGTAACC	eProvs	YHR074W	QNS1	0	0.432631	-0.593455	-1.69085
AGTACTACCATAGTAGTTAC	eProvs	YDR454C	GUK1	0	-0.175611	-1.13846	-1.69027
GAGATCTTTGACCACCGTCT	eProvs	YOR063W	RPL3	0	-1.04126	-1.20886	-1.68775
GGTCTCAACAGGAACATCAT	neStops	YBR156C	SLI15	0	-1.15511	-2.45303	-1.68343
GAATTTCAGTATCTTACAAT	neStops	YGR104C	SRB5	0	-0.657842	-1.31338	-1.68197
GGATCCTATGAATTACCTTG	neProvs	YOL143C	RIB4	0	0.0905614	-1.0843	-1.68137
TGGGTCCATGGCCACCGCGT	eProvs	YMR296C	LCB1	0	-0.646494	-1.60351	-1.68051
TATATACAGTGCGTTGTGTT	eProvs	YOR048C	RAT1	0	-0.990857	-1.91185	-1.67847
CACTCCACTCAGTGTACAAA	eProvs	YMR013C	SEC59	0	-0.192527	-1.95718	-1.67661
ATGCCAGTATCCGGCTACAG	eProvs	YDR172W	SUP35	0	-0.882955	-2.05619	-1.67514
ACCACTACTTTACAAGGTTT	eProvs	YMR108W	ILV2	0	-0.265096	-1.06686	-1.67319
CGGCACCGGTACCGTAACAT	eProvs	YNR017W	TIM23	0	-0.894584	-1.41764	-1.67289
GTGGTACCAGTTCTGATTTC	eProvs	YAL038W	CDC19	0	-0.230327	-1.54231	-1.6702
TTATTCGAACCAACTTTGGC	neStops	YLR148W	PEP3	0	-0.405588	-1.34198	-1.66767
GATCCTCAAAAACCTATAGT	neStops	YLR357W	RSC2	0	-0.338125	-0.96233	-1.66643
ACCCCACCATCTCTAATCTT	neProvs	YLR420W	URA4	0	-0.449242	-1.75604	-1.66601
GTCCAGTGTATGGGTACCAT	neStops	YBL033C	RIB1	0	-0.473351	-3.0724	-1.66512
ACATCAGAAGATCCAAACGA	eProvs	YNR016C	ACC1	0	-1.4449	-2.35712	-1.6614
ACGTTCTTGTGATATGGGGT	eProvs	YOR074C	CDC21	0	-0.665951	-1.38282	-1.65866
AAATACCCTATTCTTAGTGC	eProvs	YIL048W	NEO1	0	-1.12475	-2.52177	-1.65674
CCGCACCTCCGGTTTGTATA	eProvs	YOR116C	RPO31	0	-0.678071	-2.30479	-1.65427
TATCCGCCAATGTACAAATG	eProvs	YPL266W	DIM1	0	-0.469111	-1.3702	-1.65245
CATCCAAACTTCGAAAGGGT	neStops	YJL130C	URA2	0	-0.397756	-1.36814	-1.65093
CAGAACCTGTTTCACCAATA	eProvs	YKL078W	DHR2	0	-0.688876	-1.87233	-1.65076
CTTACCGGAACCTGTCTTTG	eProvs	YJL033W	HCA4	0	-0.912556	-2.01159	-1.64811
CAATCCGACTGCTGCTCTTG	eProvs	YLR347C	KAP95	0	-1.43572	-2.61963	-1.64411
ACGCTTCCTCTTTCAGATGG	eProvs	YGR060W	ERG25	0	-2.23815	-2.75414	-1.64279
TGTGCTCGTTACGGTAAAAA	eProvs	YJL033W	HCA4	0	-0.337017	-2.07292	-1.64271
CCCCACCAACCAGCTCGTAC	neProvs	YGL106W	MLC1	0	-0.457441	-1.71041	-1.64015
ATGTCCACCCACGTAAGTCT	eProvs	YNL262W	POL2	0	-0.935534	-2.1476	-1.63842
ATCACTCCAAAATTATTGAC	eProvs	YOL034W	SMC5	0	-0.234339	-0.8947	-1.63725
GTGGTCCAAGCATCCACCTT	neStops	YAL035W	FUN12	0	-0.45573	-1.58599	-1.63661
CTTCTCGTATACCTGTCAAC	eProvs	YER125W	RSP5	0	-1.75738	-2.02032	-1.63658
CATGCTCAATCTAAGAGAGA	neStops	YBR084C-A	RPL19A	0	-1.4364	-1.99998	-1.63616
ATTCTCCACCTGAAACCCAG	eProvs	YJL050W	MTR4	0	-1.34093	-1.80473	-1.63471
GGCCCCACCTGTGGCAAACG	eProvs	YLL011W	SOF1	0	-0.80859	-2.46882	-1.62922
ACCCAGTTAATCCAGGTATC	neStops	YHR099W	TRA1	0	-0.622889	-2.01942	-1.62866
AGCCCAAAAGAATACAATAT	neStops	YJL006C	CTK2	0	-0.147761	-0.142976	-1.62449
TTATCTTCATTAGCTATTAT	eProvs	YPR176C	BET2	0	-0.612669	-2.4901	-1.62075
CTAACCCTCTAGATATAGAT	eProvs	YML043C	RRN11	0	-0.639637	-1.01974	-1.61907
CAAATCGTAGATTTACCTTA	eProvs	YHR165C	PRP8	0	-0.0666576	-0.912466	-1.61614
GGGAAGTCAACCTATTGCAA	eProvs	YOR262W	GPN2	0	-0.226589	-1.15568	-1.61118
GACACCCTTTGGAGAACCAG	eProvs	YLR153C	ACS2	0	-1.30838	-2.98926	-1.60849
ACTGCTTCTAAGTTCGGTAA	eProvs	YOR063W	RPL3	0	-1.6285	-2.8252	-1.60747
GCTCGTCCTCAATTTGATCA	eProvs	YPL190C	NAB3	0	-0.440917	-0.822565	-1.60607
AAAATCAAAAGTTGTCTCAA	neStops	YCL061C	MRC1	0	-1.00058	-1.74491	-1.60555
TACCACGTGTTTCCTTACGG	eProvs	YDR044W	HEM13	0	0.245855	-0.245539	-1.60496
GTTACAGATTGACGGAGAGA	neStops	YHR191C	CTF8	0	-0.409798	-1.27444	-1.60409
ACTCTTCCTACATCATGCAA	eProvs	YJL125C	GCD14	0	-0.13211	-0.472259	-1.60176
AGCGACCGAATCTAATAATA	eProvs	YCL017C	NFS1	0	0.0350009	-0.61099	-1.59973
AAAGCATCTGCAACCTTGGA	eProvs	YBL097W	BRN1	0	-1.8353	-2.96349	-1.59515
GATGGCTCCAGAAGTGATCA	eProvs	YHR102W	KIC1	0	-0.31034	-1.29552	-1.59501
TTCTTCTGTCGTTGCAACTT	eProvs	YGL225W	VRG4	0	-0.571846	-1.4229	-1.59429
GCTCCACAAATGAGTTTGCG	neStops	YLR373C	VID22	0	-0.0406379	-0.313981	-1.59305
AACACCGTTCATATAAGGAT	eProvs	YPL160W	CDC60	0	-1.57363	-2.59375	-1.59178
AAGTCGAGCGGAATCAAAGC	neStops	YAL047C	SPC72	0	-0.23477	-0.830507	-1.59144
AAATCGCTGAGTAAAATGTT	eProvs	YIL143C	SSL2	0	-0.6571	-1.30171	-1.59072
TGTTTCCACAGATTATGATG	neProvs	YJL130C	URA2	0	-0.886762	-1.25311	-1.58968
TTAGGATCGGGAGGTCATAC	eProvs	YBR070C	ALG14	0	-0.366723	-1.40288	-1.58915
TTCCCTCGACAGTTCGAAAC	neStops	YNL273W	TOF1	0	-0.537723	-1.28058	-1.58807
CTCTACCTTCCACCTTGGCT	eProvs	YPR041W	TIF5	0	-1.0468	-1.45888	-1.58663
GAACCCTACTATTGATTCAC	eProvs	YGL150C	INO80	0	-0.178044	-0.481518	-1.58591
TGTCTGTTGGTGAAAAAGCT	neProvs	YNL135C	FPR1	0	-0.700652	-1.24635	-1.58568
CTTTCCAATTATCTGGATCG	neStops	YDR335W	MSN5	0	-0.84642	-1.13819	-1.58557
CCTCCACAAAGATGCATATC	eProvs	YGR265W	YGR265W	0	-2.40084	-2.33177	-1.58441
TCGTCGTATAATGATTTCCG	eProvs	YPR110C	RPC40	0	-0.773316	-1.4378	-1.58105
GAGCCCAACCCAGCACCGAT	eProvs	YMR208W	ERG12	0	-0.365336	-1.0827	-1.58076
CCTCACAAACTTCAGAATAG	eProvs	YDL164C	CDC9	0	-0.641284	-1.37878	-1.57868
TTTGTCCAACCGTAAAAAGA	eProvs	YGR274C	TAF1	0	-0.423552	-0.803642	-1.57834
GCACTCCACTCAGTGTACAA	eProvs	YMR013C	SEC59	0	-0.260913	-1.65748	-1.5763
AAAGGGTCCCCTTTACTGAT	eProvs	YKL104C	GFA1	0	-0.164094	-1.12803	-1.57586
CATTCCAACACTCACTCTTA	eProvs	YCL017C	NFS1	0	-0.0499761	-0.750296	-1.57556
CGCCACCGTGATTGCCCGTA	eProvs	YLL031C	GPI13	0	-0.758277	-1.84364	-1.57434
CATTCCGTTGTTTAACATGG	neProvs	YPL268W	PLC1	0	-1.17903	-1.39663	-1.57172
ATTCCCAATTTGCGGGTAGT	neStops	YPR074C	TKL1	0	0.0827566	-0.89111	-1.57164
ACATACCGACGCTATTGTAA	neProvs	YOR323C	PRO2	0	-0.294137	-1.07964	-1.57095
TCGTCAAACCAATCCTAATA	neStops	YER107C	GLE2	0	-0.524701	-1.47539	-1.57047
AGTACAAGATCATAATTCGA	neStops	YLR370C	ARC18	0	-1.03785	-1.64316	-1.56915
GGGTCGACCAATGGTATTGC	neProvs	YGR061C	ADE6	0	-1.03619	-1.11683	-1.56624
GCTATCTCCGGTGCTGCTGG	neProvs	YOL086C	ADH1	0	-0.380701	-0.607705	-1.56424
ACTTCCACTCACCAGTTAAT	neStops	YML008C	ERG6	0	-0.725961	-0.986419	-1.56365
CATACCTGTGTCGATATGCT	eProvs	YOR335C	ALA1	0	-0.841971	-2.47558	-1.55742
GGTACCCATGTCAACAAGAC	eProvs	YOR335C	ALA1	0	-0.333702	-1.46036	-1.55186
GACGACCTCTCAGTAATCTC	eProvs	YMR059W	SEN15	0	-0.310906	-1.33985	-1.55144
TGCGTTCGGCACAGGAGTAC	eProvs	YPL209C	IPL1	0	-0.987923	-2.28618	-1.55036
AAGTCGCCTCAGCAAATTAC	eProvs	YNL240C	NAR1	0	-0.309226	-0.949765	-1.54892
TTACCTGTCCATAATGGATA	eProvs	YOR341W	RPA190	0	-1.07387	-2.24607	-1.54747
TCCTCCCACTGTGGCCAATG	eProvs	YGL116W	CDC20	0	-2.30752	-2.31726	-1.54498
CATATCCACTTACCCCAAGA	neProvs	YLR244C	MAP1	0	-0.120383	-1.11196	-1.54458
AACACCATTTGGTCCGACAA	eProvs	YER036C	ARB1	0	-0.140398	-0.79093	-1.54413
ACGGTCAAATGGAAATGGCA	neStops	YGR061C	ADE6	0	-0.794286	-0.570285	-1.5434
AGCTGTTCCAGATTCTATTA	eProvs	YDR390C	UBA2	0	0.16977	-0.0715332	-1.53958
GCTGCCCACGACATATCATT	neStops	YLR032W	RAD5	0	-0.412632	-0.955732	-1.53895
AAAGTCATGTGCAATGAACA	eProvs	YDR182W	CDC1	0	-0.131646	-1.31517	-1.53762
AAGTTCAAGGTGGGTATGGT	neStops	YER111C	SWI4	0	-1.08121	-1.01289	-1.53568
TCTTCCCACACGATGAATGT	eProvs	YHR065C	RRP3	0	-1.81871	-2.49655	-1.5344
AAGAACATGTCACAGAATAT	eProvs	YJL091C	GWT1	0	0.0845912	-0.32639	-1.53305
GATCACAATTCTTGCTTACA	eProvs	YLR007W	NSE1	0	0.0857166	-0.423615	-1.5321
TTCCCTAAGAATATCCTAAC	neProvs	YPR159W	KRE6	0	-1.00036	-1.8075	-1.53122
CGTCCTTCAAGATCAATATA	neStops	YOR290C	SNF2	0	-1.05834	-1.68567	-1.52807
GAACACAAACTCGTACAATT	neStops	YMR212C	EFR3	0	-0.246963	-0.706676	-1.52252
GGCAATACCTGGGAACATGG	eProvs	YFL039C	ACT1	0	-2.64023	-2.45567	-1.52041
TGCTCACACCAAAGATAGTA	neProvs	YOR241W	MET7	0	0.272541	-0.342425	-1.51986
GGATTCAAATGTGGCTGGTG	eProvs	YBR038W	CHS2	0	-1.48639	-2.23869	-1.51694
GCCTCAGAAGTTGCACGCCA	neStops	YBR126C	TPS1	0	0.331605	-0.710265	-1.51265
AAAGCATGGAACTGGTAGAA	eProvs	YNL216W	RAP1	0	-0.515172	-0.642391	-1.50833
TAGACGTGGTGCTCATTGTT	eProvs	YIR008C	PRI1	0	-0.549194	-1.43561	-1.5042
TTCACGCAGAAGAAAAAGAG	eProvs	YNL308C	KRI1	0	-0.800057	-0.899062	-1.50404
ACACCAGATGGTTCTCCTTG	eProvs	YPR010C	RPA135	0	-0.765429	-1.71979	-1.49847
ATTCCCGTATTCGGCATATC	neProvs	YMR224C	MRE11	0	-0.0879802	-0.474841	-1.49672
GAGTCTCTTTGTATGAATTG	eProvs	YGR211W	ZPR1	0	0.0260885	-0.497884	-1.49647
TCCACCCCATCGTAAGTCTG	neProvs	YLR234W	TOP3	0	-0.18576	-0.704429	-1.49571
GCACCACGTCACGGTCATTT	eProvs	YOR063W	RPL3	0	-0.532084	-1.24708	-1.49494
CAGACCAACTACCTCTATCT	eProvs	YBR196C	PGI1	0	-0.215158	-0.542984	-1.49044
ACAACAAGAGCAACAAAATA	neStops	YGL105W	ARC1	0	-0.11224	-0.627368	-1.48924
GCAGCCCAGTAAAAAGCTGG	eProvs	YGR098C	ESP1	0	-1.67954	-1.80528	-1.48713
GCATTTCCTACGCCAACTAG	eProvs	YJL005W	CYR1	0	-0.659511	-0.601865	-1.48702
CTTCCAAGGATTATACTCCT	neStops	YDR127W	ARO1	0	-0.21821	-1.42462	-1.4847
CACCCTGGATAACGATGATC	eProvs	YCL017C	NFS1	0	-0.0930356	-0.757866	-1.48388
GGCTCCCAATGGGGTGATGA	neStops	YNL220W	ADE12	0	-0.0834359	-2.30812	-1.48341
CAATGCCCCCAGATAAGGGA	eProvs	YHR074W	QNS1	0	0.307672	-0.504854	-1.48171
GATGATCCAAGAGATACCGA	neStops	YBR106W	PHO88	0	-0.133695	-0.882848	-1.4814
AATCTGGATTCCCATTCATC	eProvs	YBR080C	SEC18	0	-0.832869	-2.12016	-1.48117
GGTCTCCAAACTTGAATGTT	neStops	YPR074C	TKL1	0	-0.448822	-0.834334	-1.48012
AACTCTCCAATTCACGTCCT	neStops	YAL016W	TPD3	0	-1.21712	-2.02602	-1.48003
GATCCTATAACCGTGATAAA	eProvs	YCL004W	PGS1	0	-0.198205	-0.0213821	-1.47671
GATACCGTCTGAAACACCGA	eProvs	YJR016C	ILV3	0	-0.833554	-1.57334	-1.4743
TGCCCCTAACGTGTGTTTCT	eProvs	YGR091W	PRP31	0	-0.0834762	0.0938872	-1.47364
CTTCCATCGGGCCTAATTGA	eProvs	YDL111C	RRP42	0	-1.24914	-1.75167	-1.47229
AGAACATGTCACAGAATATG	eProvs	YJL091C	GWT1	0	-0.383977	-0.794087	-1.47181
ATTCGAGGCGATGAAAACTT	neStops	YPL040C	ISM1	0	-0.376479	-0.645092	-1.47141
CATACTCAGCAACAGAAACA	neStops	YGL066W	SGF73	0	-0.964004	-0.81263	-1.46969
CCACAGTAGTAAGGACCTTG	eProvs	YPR035W	GLN1	0	-1.28849	-2.02816	-1.46895
TTCCCCAATGATCTGGCATT	neProvs	YPR133W-A	TOM5	0	-0.315359	-0.675639	-1.46895
TACCACTCTCATCCAGGGTT	eProvs	YFR004W	RPN11	0	-0.93525	-1.46499	-1.4687
GGGTCAAGAACTGGACTCTT	neStops	YER026C	CHO1	0	-0.799592	-2.42064	-1.46826
GGCCCACCTGGTGCCGGTAA	neProvs	YDR226W	ADK1	0	-0.338809	-0.94178	-1.46639
TGTTTCAGACGGTATCTCTA	eProvs	YJR016C	ILV3	0	-0.79157	-2.53238	-1.46605
GAAGTGCCCAATCTCCCACG	neStops	YLR357W	RSC2	0	-0.292587	-0.777067	-1.46239
CAACCGTATCAGAGTCACCA	eProvs	YPR181C	SEC23	0	-1.03936	-2.24033	-1.46181
TCCCTACAGGAGGAGGAACA	eProvs	YHR107C	CDC12	0	-1.22155	-1.87125	-1.46077
GATGACCAGAAGACCTACAT	neStops	YGR180C	RNR4	0	-0.762687	-1.05118	-1.45892
TAACTCACGTTCCATTATGG	eProvs	YDR182W	CDC1	0	-0.268103	-1.40664	-1.45671
TGTTCAAAACCTAGTTTCTA	neStops	YJL130C	URA2	0	-0.413346	-1.79757	-1.45653
TCGGTATCCCGTGATATGTT	eProvs	YLR305C	STT4	0	-0.228216	-0.962014	-1.45612
CCAAACTGCTAACATTGCTT	eProvs	YKL152C	GPM1	0	-0.479758	-1.80809	-1.45585
TATCACATGCTTGTTTGCAT	eProvs	YBR265W	TSC10	0	-0.469344	-1.50966	-1.45567
TTCCAACCATATACTTGCAC	eProvs	YNL240C	NAR1	0	-0.329212	-0.617297	-1.45356
TCCCATTCAACAGTTGCAGG	neStops	YMR217W	GUA1	0	-0.715704	-1.86386	-1.44955
CTCCGATACCAAGTCCCAGC	eProvs	YNR017W	TIM23	0	-0.179866	-0.354362	-1.44872
AGATTCTCTGGTGGTTCTCA	eProvs	YJR016C	ILV3	0	-0.572455	-1.47789	-1.44722
AAACCACGGGTAGTGATCAT	eProvs	YLR355C	ILV5	0	-0.801035	-1.62122	-1.4472
TGTCCCTTGAGAGCCGCTGA	eProvs	YDR487C	RIB3	0	-0.0647086	-1.09014	-1.44652
GTCCCTCATTTGTCAGAGTC	eProvs	YEL055C	POL5	0	-0.601129	-1.39121	-1.446
GGTCGTGGTATTAAAGAAGA	eProvs	YOR168W	GLN4	0	-0.133215	-1.4762	-1.44167
GGTCACCCAGGTGCTCCATT	neProvs	YPR074C	TKL1	0	-0.610619	-1.07259	-1.4413
AGTCCACAAAGTCAAAAACA	neStops	YKL054C	DEF1	0	-0.689581	-1.18171	-1.43714
GGCACCATCCACCAGAAATT	neStops	YDR101C	ARX1	0	-0.302439	-0.612209	-1.43167
AAATCAAGAGAGACTTGAAG	neStops	YFL023W	BUD27	0	-0.205536	-0.502518	-1.43119
ATACCCCCGAAACCATTCTT	neProvs	YKL216W	URA1	0	-1.81066	-2.42238	-1.43045
TATACCAATTCCATGGGAAA	neStops	YCR044C	PER1	0	-0.0316461	-0.553125	-1.42918
TTGACCCCGTTGTCCTGGTA	eProvs	YEL058W	PCM1	0	-0.0195879	-0.862834	-1.42827
CTCTTCTGCTGTCGATAAGT	eProvs	YPR033C	HTS1	0	-0.496889	-1.49444	-1.42812
CGTCAGAAAAGGTCATTGGC	neStops	YDR159W	SAC3	0	-1.01311	-1.33856	-1.42509
AGACCATAAACAGTTTCGGT	eProvs	YGL169W	SUA5	0	0.131949	-0.696164	-1.42459
AATGTACGAGACGTGAGAGG	neStops	YHR111W	UBA4	0	-0.171383	-0.363313	-1.42316
TACACCTTGGATCTTTAACG	eProvs	YPR010C	RPA135	0	-0.845607	-0.872303	-1.42301
CTCCAACCAATATTACCATC	neStops	YPR159W	KRE6	0	-0.522966	-1.17393	-1.42264
GTTCTCACGGTAAGGATGCT	eProvs	YDR023W	SES1	0	-1.31984	-1.8992	-1.42232
CGACCCCTGGTTCAATTATA	eProvs	YGL022W	STT3	0	-0.227064	-1.02592	-1.41874
CAATACTATGGATTTGGCGC	eProvs	YAL001C	TFC3	0	0.159581	-0.086543	-1.41487
CGTACCAATGGCAGCATAAT	eProvs	YLR196W	PWP1	0	-0.412204	-1.05091	-1.40958
GATCGAACAGTGATGGATCT	neStops	YBR170C	NPL4	0	-0.0275682	-1.37684	-1.40925
TAATCTCCGCGCCCAGGTCT	eProvs	YKL045W	PRI2	0	-0.705068	-1.24682	-1.40914
GTTCAATATCTCTCTGAATT	neStops	YBL058W	SHP1	0	-0.16808	-0.792458	-1.40832
TTCTCCCTGCTCGACACATT	neProvs	YNL076W	MKS1	0	-0.433617	-0.951321	-1.40725
AAGTATCCAGAAGGTTCAGG	eProvs	YGL245W	GUS1	0	-0.96424	-1.87601	-1.40676
AGAGCCCAGAAAGATGAATT	neStops	YJL129C	TRK1	0	-0.950262	-1.92813	-1.40596
TCGATCATTTGTTGTTCGTT	neProvs	YHR073W	OSH3	0	-0.42661	-1.17271	-1.40483
GCACCAACAGGTGTCTTGAT	eProvs	YPL231W	FAS2	0	-0.990261	-1.33342	-1.40227
TCTACCTGGCTATATACAAG	neProvs	YOR211C	MGM1	0	-0.260773	-0.3251	-1.3947
AAGTCGAGGTACCCCAATGA	neStops	YML032C	RAD52	0	-0.912418	-1.5544	-1.39434
ACACCCTTCAATTTATACTC	eProvs	YNL221C	POP1	0	-0.179252	-0.833325	-1.39097
TGATCAACCCGGTGCCTGGG	neStops	YNL220W	ADE12	0	-0.577476	-1.82656	-1.38924
AGCCCATGTTGAATCTTCCC	neProvs	YPL101W	ELP4	0	-0.589714	-0.741504	-1.38787
CTATCAACAAGGCCAGCATT	neStops	YIL128W	MET18	0	0.0208997	-0.290609	-1.38713
TCGACCCCTGGTTCAATTAT	eProvs	YGL022W	STT3	0	-0.209939	-1.3479	-1.38701
AACCATCATTTGAGGTATTA	eProvs	YKL045W	PRI2	0	-1.17387	-2.26765	-1.38644
CCTACACTTCATTTCACCTT	eProvs	YNR046W	TRM112	0	-0.590441	-1.23706	-1.38444
ATCCCATCTTGTCACTGCGC	neStops	YKL054C	DEF1	0	-1.51163	-2.15066	-1.38105
GTATCAGTCTACAGAAGGAT	neStops	YGL016W	KAP122	0	-0.0260365	-0.661066	-1.38083
GCTTCTTCCCATGGGATACT	eProvs	YEL058W	PCM1	0	-0.0957031	-1.75656	-1.38054
TGTTATCCACCCAATTTGTT	neStops	YDR176W	NGG1	0	-0.741852	-1.07612	-1.38031
TCACTGAAATAAGAAAAGGC	eProvs	YLR140W	YLR140W	0	-0.975873	-1.56161	-1.37925
ATCCCTACAGGAGGAGGAAC	eProvs	YHR107C	CDC12	0	-0.490097	-0.821488	-1.37806
ATATACCACTTGGCTCGGTC	eProvs	YOL038W	PRE6	0	-0.717477	-0.609061	-1.37681
ACTATACCTTGATCGTTGAA	eProvs	YOR207C	RET1	0	-0.562426	-0.691842	-1.37621
GGTACAGGTGGAATTAAGTC	neProvs	YKL216W	URA1	0	-0.354193	-1.55479	-1.37424
ACCACCGTTAAATTCGTTGA	eProvs	YER036C	ARB1	0	-0.302894	-0.400048	-1.37374
GCTCAAGAAGTGCCACACGA	neStops	YDL047W	SIT4	0	-0.505835	-0.616845	-1.37248
ATCTTCAAACTATACGAGAA	eProvs	YCL004W	PGS1	0	0.17437	0.246376	-1.37178
CCGTTCTTCCTCTAATGTTT	eProvs	YNR016C	ACC1	0	-0.668354	-1.88772	-1.37147
GCTCTTCAAGACACCAATTT	neStops	YHR011W	DIA4	0	-0.477737	-0.500517	-1.37007
CACTCAGAACTCGCTTGGGT	neStops	YLR417W	VPS36	0	-0.258985	-0.675007	-1.36934
CACCTGTTCTAATAGAGGTG	eProvs	YDR062W	LCB2	0	-0.78335	-1.65607	-1.36883
TTCTCAAGCCTGTAGCAGTA	neStops	YDL077C	VAM6	0	-0.0829921	-0.333052	-1.36822
ACTCAGTACGTCAACGCAGA	neStops	YKR042W	UTH1	0	-0.247212	-1.59144	-1.36777
GTGGCACCTGAAGTCATCAG	eProvs	YPL153C	RAD53	0	-0.099461	-0.57335	-1.36768
TGGTCACCATTGATCAAGAC	eProvs	YMR131C	RRB1	0	-0.45756	-1.2597	-1.36703
CGTCACCTGTAACTAAATAC	eProvs	YDL145C	COP1	0	-1.82322	-2.6794	-1.36696
TTCCATCTGGTGATTGAGAT	eProvs	YDL103C	QRI1	0	-0.125743	-0.820979	-1.36616
AGATTACATTGGGATGGGTG	eProvs	YNL132W	KRE33	0	-0.777236	-1.36695	-1.35641
GTCATTCAAGGTGCCGGTGC	neStops	YJR139C	HOM6	0	0.0482129	-0.477645	-1.35536
TTCTCATTTAATTGCTCCTT	eProvs	YLR153C	ACS2	0	-0.290592	-2.04942	-1.35434
ATATCGTCCAACATTTGACC	eProvs	YDR160W	SSY1	0	-0.104744	-0.465735	-1.35397
GGTCCAATCAAGACACCTGT	eProvs	YPL231W	FAS2	0	-0.542592	-1.58522	-1.35007
TCAGGCCAGGGCCAAAGACT	neStops	YBL058W	SHP1	0	0.0867816	-0.254748	-1.34902
TTTATATCCAAGTATTATGA	eProvs	YDL102W	POL3	0	-0.40651	-0.967668	-1.34802
CAATCAGAGCAAGAGTAGCA	neStops	YLL027W	ISA1	0	-1.11693	-1.43267	-1.34684
AATTTCAAACATTGGAGAGA	neStops	YOR069W	VPS5	0	-0.814909	-0.87999	-1.34654
TGCTCCTATTGGGTCCGTCT	neProvs	YEL046C	GLY1	0	-0.81511	-0.831586	-1.34566
GCATCTCCAAATTCCTCGAC	eProvs	YOR148C	SPP2	0	-0.390374	-0.92753	-1.34434
AGACCTCTGTGAGTCTTTCT	eProvs	YOR063W	RPL3	0	-0.269491	-0.673581	-1.34424
TTCCGAGGGGGTACCAGGTA	eProvs	YGL022W	STT3	0	-1.84927	-3.06625	-1.34397
ATCACAATTCTTGCTTACAT	eProvs	YLR007W	NSE1	0	0.00181082	-0.684125	-1.34069
CGTCCATCTTATGTGTTATC	neProvs	YJL130C	URA2	0	-0.0993511	-0.506543	-1.33984
CAGATCCTTCTAGACAAACT	neProvs	YPL040C	ISM1	0	-0.13138	-0.374671	-1.33596
AGCCCACACATCTGATAGTT	neStops	YBR112C	CYC8	0	-0.277269	-1.30857	-1.33584
CTCCACCAATACTAATAACG	eProvs	YDR240C	SNU56	0	-0.588891	-1.17164	-1.33397
GATGTCCGTAAGGAATTATA	eProvs	YFL039C	ACT1	0	-0.966838	-1.58575	-1.33298
TGGGCAAAGGCTGTTCACTA	neStops	YGL129C	RSM23	0	-0.512144	-0.334796	-1.33222
TAATGCCTGTAGTCTTTATA	neProvs	YHR005C	GPA1	0	-2.11155	-2.06517	-1.3321
ATGTCCCGTATCATTGTCAA	eProvs	YPR112C	MRD1	0	-0.295767	-0.940115	-1.33091
CACCAAGAGAATGTGTGATC	eProvs	YFL037W	TUB2	0	-1.83935	-3.9647	-1.33017
ATCATACCTTCATATAGGAT	eProvs	YDR353W	TRR1	0	-0.384662	-0.726495	-1.32735
CTACCATCGATCATATCACT	eProvs	YGL040C	HEM2	0	0.0505879	-0.180768	-1.32539
GCATTCAGGGTAGGTTAGAT	neStops	YKL113C	RAD27	0	-0.382232	-1.0187	-1.32512
GTTCTTATAGAGAATTGCCA	eProvs	YIL078W	THS1	0	-0.307159	-1.06853	-1.32458
AAAGGCTCAGGAAACTGGTG	neStops	YJL080C	SCP160	0	-0.341607	-0.409568	-1.32419
ATACCAGCATGGTCGAAACC	eProvs	YGR094W	VAS1	0	-0.222816	-0.913368	-1.32314
TTAACCCTTGGAATAAAACC	eProvs	YNL221C	POP1	0	0.0609413	-1.42283	-1.32177
TCACTCCCTGGCACATGATT	eProvs	YNL216W	RAP1	0	-0.2601	-0.728359	-1.32013
AACCCATCAGTGATGATCCG	eProvs	YDR188W	CCT6	0	-1.25852	-1.8745	-1.31987
CCACAACCCCAACCACCAGT	eProvs	YDR037W	KRS1	0	-1.12866	-2.29295	-1.31658
ATAGCCCAACCAATGTGATG	neStops	YCR042C	TAF2	0	-0.600638	-1.34808	-1.3164
ACACTTTCAGTATGCCTCCA	neStops	YJR049C	UTR1	0	0.089357	-0.0771209	-1.31521
ATGACAAACTTTCTTGGTAC	eProvs	YPL117C	IDI1	0	-0.239049	-0.600075	-1.31416
TTCATTTCACCGCTCGTTCA	eProvs	YKL165C	MCD4	0	-0.564875	-0.29612	-1.30933
CCCTGCCAACAAGGCTGTAA	neStops	YFR019W	FAB1	0	-0.266979	-0.370855	-1.30767
TGGAACATGACACCAGTAGT	eProvs	YCR072C	RSA4	0	-0.405489	-1.13113	-1.30425
ATTCTCCAATCATTCAGTCC	eProvs	YGL207W	SPT16	0	-0.90993	-1.07895	-1.30352
CGCGCCAACAATACTACTCT	neStops	YHL025W	SNF6	0	-0.624957	-1.00718	-1.30277
ATGCCAACTGAATCCCGTCC	eProvs	YKL165C	MCD4	0	-0.535074	-1.19184	-1.30109
ATTACAAGAGATTTAGTTTG	eProvs	YGR264C	MES1	0	-0.551542	-1.79533	-1.30084
CCGCTTCTACTCTGCATAAC	eProvs	YGL150C	INO80	0	-0.0463512	-0.425387	-1.30002
CTAAACCATTAACACCTGCC	eProvs	YBR243C	ALG7	0	-0.355369	-1.33806	-1.29921
ATACTACAATTGCCCAAGTA	neStops	YLR312W-A	MRPL15	0	-0.614414	-0.68298	-1.29878
CCAAACCCTTGTTGTCAGAG	eProvs	YHR020W	YHR020W	0	-1.25286	-2.5798	-1.29714
TGAGCCCAACCCAGCACCGA	eProvs	YMR208W	ERG12	0	-0.00803668	-1.16916	-1.29696
CGTAGTCAAAAGTTCGATTT	neStops	YGL173C	XRN1	0	-0.225707	-0.567577	-1.29522
AGCCACCAATTAGGAGTACC	neStops	YDR159W	SAC3	0	-1.11788	-1.66636	-1.29512
GTAGCCTTCTGCCATGTGAC	eProvs	YMR108W	ILV2	0	-0.648229	-1.32322	-1.29288
TTCCACACTGAACTCAACAT	eProvs	YKL165C	MCD4	0	-0.988084	-1.04866	-1.29268
GCTGATCCAGCAAGGACCAT	eProvs	YDR362C	TFC6	0	-0.158281	-0.963911	-1.29126
CGAACCATCATGATCTTGAT	eProvs	YNL088W	TOP2	0	-0.167086	-0.609353	-1.28874
TTACTCTGCTTATAAGTCTC	eProvs	YDL205C	HEM3	0	0.383206	0.219476	-1.28677
TCCCCCGCACTAGCAAATAA	eProvs	YJL156C	SSY5	0	-0.1417	-0.627135	-1.28645
TTGTCCCTCCTGTGATGTAA	eProvs	YPR165W	RHO1	0	-2.26051	-1.98171	-1.28557
AATTCAGAGTACTCTCGCAA	neProvs	YHR200W	RPN10	0	-0.348645	-0.610128	-1.28245
TTTCATTCGAACGTTTACAT	neStops	YFR019W	FAB1	0	0.0426948	-0.144372	-1.28236
TGAACCATTCACAGTTATGG	neStops	YBR200W	BEM1	0	-0.451021	-0.741475	-1.28166
CCCACCAAAACGTCCACCTG	eProvs	YAR008W	SEN34	0	-0.114928	-0.230696	-1.27861
GCTGCCCACTCCCATATTAC	eProvs	YPL235W	RVB2	0	-0.749467	-1.55728	-1.27701
ATTCAAGGTGGTATTCTATC	neStops	YLR369W	SSQ1	0	-0.0750049	-0.424123	-1.27603
ATGTTCTGTTGCAGTGGAAG	eProvs	YNL061W	NOP2	0	-0.47436	-0.47873	-1.27517
ATCTCAATTACTTATGCAGT	neStops	YDR004W	RAD57	0	0.00221537	-0.550273	-1.27428
TAATCACATAGAATAGAGTA	neProvs	YEL046C	GLY1	0	-1.38965	-1.51527	-1.27288
AGACCACACGCCTCACCTTC	eProvs	YOR207C	RET1	0	-0.715925	-1.17052	-1.27266
CTACCATCCAAACGTTTACA	eProvs	YDR054C	CDC34	0	-1.04108	-1.53301	-1.27222
CATCTATTACTATAAAATAC	eProvs	YGR191W	HIP1	0	-1.21452	-2.29331	-1.27211
ACTTTATCCAATTTATGCAG	eProvs	YNL189W	SRP1	0	-1.61954	-1.65327	-1.27158
TATCTCCTTTCTTTCCTGCA	eProvs	YLR336C	SGD1	0	-0.33918	-1.23343	-1.27051
AGCCCATGGTGCGTGTTCTC	neStops	YGL009C	LEU1	0	-2.65714	-2.84833	-1.26944
TCCTCCCAATTACAAGCTAA	neStops	YJL056C	ZAP1	0	-0.573304	-1.47963	-1.26938
ACATCAAAAAACCCGTCAAA	neStops	YKL138C	MRPL31	0	-0.643896	-0.558885	-1.26921
TGTTTCAAGATTCACAAGCT	neStops	YFR001W	LOC1	0	-0.899611	-1.43672	-1.26589
GCCCAGAAAGATGAATTAGG	neStops	YJL129C	TRK1	0	-0.490813	-1.35449	-1.26522
CATACCCAAAACCGCAACAT	eProvs	YBR167C	POP7	0	-0.243358	-1.39225	-1.26372
GTTTCTGCGCACACATCGGC	eProvs	YJL050W	MTR4	0	-0.317133	-0.632094	-1.26298
GTACCCTCTACTGTAGGCAA	neProvs	YFL001W	DEG1	0	-0.45829	-0.529197	-1.2615
TGCCACCTTACCAAATTATG	eProvs	YER172C	BRR2	0	0.10726	-0.754974	-1.26138
TGCTCTACCGCTTCTTTGAT	eProvs	YMR128W	ECM16	0	0.0812836	-1.18323	-1.26133
ATTATTCCTCTCAGGTATGG	eProvs	YLR430W	SEN1	0	-0.531993	-0.848242	-1.258
TACGTACATGTTTCTGAGGT	eProvs	YPL231W	FAS2	0	-0.745363	-1.34678	-1.25687
ATCCCGCCACCCACATATAT	neProvs	YOR211C	MGM1	0	-0.673091	-0.693785	-1.25527
TTGGACCAACTCGCTGCAGG	neStops	YLR234W	TOP3	0	-0.0965962	-0.426113	-1.25458
GAAACATCTGTTACCATATC	eProvs	YKL078W	DHR2	0	-0.280059	-1.32357	-1.25289
GCCCATTCTATAGGCGCTAT	eProvs	YDR062W	LCB2	0	-0.326852	-1.28837	-1.24965
TGCCCATAAGATATAAGGAA	eProvs	YPR142C	YPR142C	0	-1.45496	-1.56341	-1.24921
TGTACACATTGCCTGGATAT	eProvs	YDL007W	RPT2	0	-0.624178	-1.29251	-1.24878
ATCTGATCCAGTCCCTATCC	neStops	YNL243W	SLA2	0	-0.802454	-1.33473	-1.24827
TTATCTCAACTGACCAAACT	neStops	YHR056C	RSC30	0	-0.195426	-0.396465	-1.24505
TATACATGTTGCTAAATGAT	eProvs	YHR169W	DBP8	0	-0.505653	-1.24603	-1.24148
GATCAACCCTCTGTTGCCGT	neStops	YNL248C	RPA49	0	0.0312776	-1.2163	-1.24018
GGAATATCAAAAACTGGCTC	eProvs	YBR237W	PRP5	0	-0.368217	-1.90815	-1.23919
TATACGTATTCAGCTACGAA	eProvs	YHR166C	CDC23	0	-0.70141	-1.53824	-1.23761
ACTCCAGAAGGTGAGGCGTG	eProvs	YOR207C	RET1	0	-1.03134	-2.18045	-1.23596
CATCGTGGACAAGATGCAGC	neProvs	YMR300C	ADE4	0	-0.918086	-1.06391	-1.23514
AGGTCACCCAGGTGCTCCAT	neProvs	YPR074C	TKL1	0	0.0801446	-0.373773	-1.23419
ACCTTTACCACCACCACCTT	eProvs	YNR016C	ACC1	0	-0.965986	-2.15215	-1.23205
TTAGTATCTCTATTAATCCA	eProvs	YBR080C	SEC18	0	-1.06122	-1.89269	-1.23064
TTCACCATTTGGAGTCTTTC	eProvs	YHL015W	RPS20	0	-0.387199	-0.559364	-1.22963
TAAATCAGATCTATTCCGTC	eProvs	YKL035W	UGP1	0	-0.369325	-1.02675	-1.22905
AGAACCACTAATAATATGCT	eProvs	YOR272W	YTM1	0	-0.612769	-1.55328	-1.22732
TCACCGGCTTCACCACAATG	neProvs	YML035C	AMD1	0	-0.0145573	-0.105995	-1.22712
AGAACCGCAAGAGGCACTAA	eProvs	YMR290C	HAS1	0	-0.135241	-0.940118	-1.22394
CCGAACATCAACCCGTTTCG	eProvs	YGL022W	STT3	0	-0.114644	-1.11533	-1.22385
AAGCACAAATCAAAAAACAT	neStops	YML035C	AMD1	0	0.142287	-0.415923	-1.22359
GTTACAAGGTATGTTAAACA	neStops	YPL106C	SSE1	0	-0.2003	-0.534247	-1.21999
TGAGCAAGACGGTTTAACCA	neStops	YBR170C	NPL4	0	-0.145034	-1.24406	-1.21998
GAAATTTCTGGTATGATCTT	eProvs	YJL034W	KAR2	0	-0.303397	-0.505487	-1.21862
TTCATACAGTTCCCACAAAT	eProvs	YDR303C	RSC3	0	-0.449345	-0.939478	-1.21799
CCCCGGAGGGACGTATACAT	eProvs	YOL078W	AVO1	0	-1.85898	-2.23929	-1.21604
TGGTTCCATCCAATGACCCT	eProvs	YGR191W	HIP1	0	-1.93127	-2.35769	-1.21557
GTTCGACCGCGCTAGAGTCG	eProvs	YFR029W	PTR3	0	-0.313217	-0.539055	-1.21441
TTGCCTAGTTCCAAGGAAGA	eProvs	YNL262W	POL2	0	-0.708564	-1.53545	-1.21336
AGACCTTCCATCATGGTATA	eProvs	YJR016C	ILV3	0	-0.12581	-0.612137	-1.21137
GTCCACCAGAGCAAGAGTAA	neStops	YHR187W	IKI1	0	-0.101766	-0.549069	-1.20995
GCAGGACATTTATTTCCGGG	eProvs	YPR056W	TFB4	0	-0.981526	-2.34759	-1.20943
CATATCTTATCGTTTCACAA	eProvs	YBR123C	TFC1	0	0.164305	-0.312173	-1.20936
TGCGTACCGACGACCAGGCA	eProvs	YLR229C	CDC42	0	-1.51151	-2.54972	-1.20918
GTCTGTGCATAGTATTAAAA	eProvs	YNL267W	PIK1	0	-0.341557	-1.25704	-1.2079
TTGTCCGAGAGAAATAGGGC	eProvs	YLL035W	GRC3	0	-0.252285	-1.54014	-1.20729
CTTCAAACAGACTACAGTAG	neStops	YKR082W	NUP133	0	-0.3773	-0.950218	-1.20698
GCTACCAATTAGAAATTGTA	neStops	YEL013W	VAC8	0	-0.322896	-0.482736	-1.20692
AAATTACAAAAGAATTATGA	neStops	YLR182W	SWI6	0	-0.774424	-0.912115	-1.20521
ACCACATAACAGTTGCTTGG	neProvs	YLR432W	IMD3	0	-0.0274538	-0.678348	-1.20354
GCTCAATACAACGAAATTCA	neStops	YLR044C	PDC1	0	-0.611345	-1.05605	-1.20133
GATGCAGAGGCAGCTCATCA	neStops	YHR041C	SRB2	0	-0.868682	-0.961749	-1.19692
GTTGGTCGTACCGCCAGAGC	eProvs	YLL008W	DRS1	0	-0.94353	-1.86361	-1.19623
TTCTAACCAAACTTCTCTCA	neStops	YGR240C	PFK1	0	-0.155004	-0.323802	-1.19512
ACTACATCAACAACAGGAAC	neStops	YBL079W	NUP170	0	-0.158063	-0.946865	-1.19504
TTAAATCCAATGGTTCCCGG	eProvs	YBR080C	SEC18	0	-1.14663	-2.24438	-1.19204
CACCGGTGTAACATTCAGAA	neProvs	YBL033C	RIB1	0	-0.57871	-1.42754	-1.18904
AATTTCAATGCCTGTCGCTT	eProvs	YHR164C	DNA2	0	-0.389812	-1.25345	-1.18897
GGGGTACAGGTTGGGGGAGT	neStops	YHL025W	SNF6	0	-0.816218	-1.49616	-1.18861
TACCCACCCGTTAACAGTAG	eProvs	YJL069C	UTP18	0	-0.597333	-0.786513	-1.18705
ATCCTTTCCGGTGATTCCGT	eProvs	YFR029W	PTR3	0	-0.127347	-0.466449	-1.18699
GTTTCATATACGTTATTTAC	neProvs	YBL071C-B	YBL071C-B	0	-0.814953	-0.990572	-1.18592
GTCTCAACAACTTCCTCCAG	neStops	YGL095C	VPS45	0	-0.307139	-0.527653	-1.18539
TTGCCCCACCCCCTCTAGCG	eProvs	YPR088C	SRP54	0	-1.11848	-1.87169	-1.18539
ATCTCCTTCAGAATCAAGGG	neProvs	YAL012W	CYS3	0	-0.413994	-0.50351	-1.1848
GCACCTTGGAATGTAAACAT	eProvs	YKR081C	RPF2	0	-0.777805	-1.35536	-1.18468
TGGATAACCACAGGAGGAAC	neProvs	YLR185W	RPL37A	0	-0.942462	-1.41889	-1.18119
TACTTCTTATCATTCATGTT	eProvs	YKL104C	GFA1	0	-0.755482	-2.10514	-1.18092
GGCCCATTTATTAATAACCG	neProvs	YGR270W	YTA7	0	0.259796	-0.201738	-1.18051
CCAACAGAACTACTGGGATG	neStops	YAL035W	FUN12	0	-0.37083	-0.732572	-1.17988
ATTCCACAGTCGTAGCCATT	eProvs	YPL020C	ULP1	0	-0.463109	-0.844123	-1.17929
GGACCATAAATCAACCGCAG	neStops	YPL042C	SSN3	0	-0.445961	-0.26472	-1.17545
GGTTCAAAAGGCCATTGACC	neStops	YPR173C	VPS4	0	-0.536865	-0.888813	-1.17438
TCAGGTTCTGACGTTGGGAC	neProvs	YDR300C	PRO1	0	-0.020832	-0.444121	-1.1742
CCTAAACCGGAAGCTCCACC	eProvs	YKL182W	FAS1	0	-0.838509	-1.67636	-1.17342
GTGTTCCCATGGAAGTCATG	eProvs	YFR004W	RPN11	0	-0.729295	-1.14577	-1.17158
ACCAACGTTCTTGTGATATG	eProvs	YOR074C	CDC21	0	-0.0603001	-1.16355	-1.1695
TTGACCGACGTACTGTCTCC	eProvs	YOL021C	DIS3	0	-0.210806	-1.2493	-1.16885
CATGGACATGGAGCGTCCCA	neProvs	YGL234W	ADE5,7	0	-1.03657	-1.31265	-1.16846
CGGTTCCACTGGTTCTCCAA	eProvs	YLR153C	ACS2	0	-1.41636	-1.94837	-1.16819
TTCCATTTCCGTACCTTCAC	neStops	YDR123C	INO2	0	-0.0896149	-0.304987	-1.16787
ACTATCCAAAAATTACACGA	eProvs	YAL025C	MAK16	0	-0.480487	-0.394924	-1.16755
GATATCTCACACAAACGTTA	neProvs	YKL101W	HSL1	0	-0.318011	-0.735923	-1.16685
CATCAATGGCTAGATCTGTT	eProvs	YLR153C	ACS2	0	-0.303684	-1.5535	-1.16356
AAATCAAATGGCTGACAGTG	neStops	YKL041W	VPS24	0	-0.697701	-1.10894	-1.16331
TGTGTCCTTGTCGACATAGC	eProvs	YHR165C	PRP8	0	-0.493282	-1.74351	-1.16148
CAAGTCGCCTCAGCAAATTA	eProvs	YNL240C	NAR1	0	-0.093782	-0.224952	-1.15887
ACCCTCAGTCACATACATCT	neStops	YNL141W	AAH1	0	-0.179907	-0.327516	-1.15702
CGTTCTTCCTCTAATGTTTG	eProvs	YNR016C	ACC1	0	-0.523078	-1.59393	-1.15685
TGTCTCCACATACAGTAACG	neProvs	YDL047W	SIT4	0	-0.733762	-0.707219	-1.15608
CCCACAGGATCAACCACAGA	neStops	YOR123C	LEO1	0	-0.5019	-1.02687	-1.15505
TTGTTATCCGGTGATAACTA	eProvs	YPR085C	ASA1	0	0.0677674	-0.66353	-1.15442
GCGCTCTCAAAGCAAACACA	neStops	YDR207C	UME6	0	-0.523023	-0.46325	-1.15337
ATCACAGAACTTACTTGGTA	neStops	YFR019W	FAB1	0	0.0845012	0.121868	-1.15301
GTCATACCATGCTCTTTCCT	neStops	YNL227C	JJJ1	0	-0.0840449	-0.29516	-1.15267
CCAGTTTCCATATCCTTCTG	neProvs	YLR382C	NAM2	0	-0.264281	-0.516463	-1.15211
AAGGACCAAGATGCTAGTGC	neStops	YDR392W	SPT3	0	-0.19468	-0.344172	-1.15176
GTCCGTATGAACTTCTCTCA	eProvs	YAL038W	CDC19	0	-0.153163	-1.35331	-1.15053
GCTTCCGCAATTGATGGTTG	eProvs	YNL163C	RIA1	0	-0.393941	-0.682353	-1.1494
ATTTCCATTTGACCTCATAT	neStops	YPL226W	NEW1	0	-0.145796	-0.579184	-1.1493
CCCCTCACTGGGGAAAAATT	eProvs	YHR072W	ERG7	0	-0.173448	-0.678737	-1.14846
CCAAACACCTCATACTAAAT	eProvs	YKL095W	YJU2	0	-0.370863	-0.97576	-1.14681
AAAATACCCTTACCTGGAGC	eProvs	YPL231W	FAS2	0	-0.765501	-1.48652	-1.14437
GGCTCAGCCTGCCGAACCAC	neStops	YNL071W	LAT1	0	-0.717939	-0.914846	-1.14414
CACATCCCACCAGCCAGGCC	neStops	YDR127W	ARO1	0	0.124923	-1.2632	-1.14382
CAAATCTTTCATTTGTCCAG	eProvs	YPR186C	PZF1	0	-0.197842	-0.348657	-1.14127
ATCACCCACTGCTGAGACAG	eProvs	YGL040C	HEM2	0	-0.12765	-0.590191	-1.13755
TAGTTCACAAGAAGCTTCCA	neProvs	YER070W	RNR1	0	-0.615989	-1.07483	-1.13743
CGAGTTCCAGATTATGGAAT	neStops	YOR147W	MDM32	0	-0.120851	-0.0461342	-1.13602
AAGGCACCAGTGACGTTTGG	eProvs	YGR094W	VAS1	0	-0.719774	-1.24812	-1.13511
CGATCCCTGGCCAAGCACCG	eProvs	YGR048W	UFD1	0	-0.778246	-1.8463	-1.13467
GGTAAACAGTCCAAAGTGTC	neStops	YER086W	ILV1	0	0.461045	-0.551757	-1.13284
GTTCAGGCCATCGCAGCTAT	neStops	YDR300C	PRO1	0	0.0184683	-0.564259	-1.13218
AAAGCAAGATGCTTTCTTCA	neStops	YGL095C	VPS45	0	-0.248637	-0.210776	-1.13048
CTATCTCAGAGAAATTGGCT	neStops	YDR080W	VPS41	0	-0.237331	-0.49077	-1.13003
AAATCCTTTGGCTAAAACTA	eProvs	YML105C	SEC65	0	-0.809547	-2.11483	-1.13001
GTCCCATTGAGAAAGGTCAG	neStops	YOR274W	MOD5	0	-0.851534	-0.893617	-1.12881
GGGCACAAGATAACTTGATC	neStops	YLR369W	SSQ1	0	0.283273	-0.0200297	-1.12695
GTTTCTAGAGCTATTATATA	eProvs	YOR329C	SCD5	0	-0.61034	-0.700511	-1.12461
CCCCACCATCTCTAATCTTG	neProvs	YLR420W	URA4	0	-0.0957994	-0.843888	-1.12161
GTGTCCATCTGGGGAGAAAA	eProvs	YOL038W	PRE6	0	0.108958	-0.458177	-1.12154
CCAACCACCAGATAGCAAAT	eProvs	YPL126W	NAN1	0	-0.207676	-0.685376	-1.11905
TACTCAGTTCACCAAGCTAC	neStops	YCR081W	SRB8	0	-0.385969	-0.513058	-1.11884
ATTGCTCCCAGGAGTCGACC	neStops	YER019W	ISC1	0	-0.589164	-0.681072	-1.11815
AAGCCACAAACAACAGTAGT	eProvs	YDR362C	TFC6	0	0.0272724	-0.674622	-1.11787
GCATCATTATTTGCGCCATT	eProvs	YBR029C	CDS1	0	-0.265206	-0.697978	-1.11748
CACCATCAACAAGAACAGTT	eProvs	YPL028W	ERG10	0	-0.207137	-0.572092	-1.11715
TGTGGTCCCGCCGGGTTCTA	eProvs	YMR296C	LCB1	0	-0.213942	-1.40951	-1.11696
GGGCCAGTATTTATCTAAAA	neStops	YNL087W	TCB2	0	-0.67136	-1.20483	-1.11597
CTAATCCATTTCGCTAAACT	neStops	YKL181W	PRS1	0	-0.0977395	-0.57486	-1.11503
CTGCCCACGCACTAACAAAG	neStops	YER087W	AIM10	0	-0.353379	-0.614957	-1.11493
TGGTCATTCTAAAGCTATTA	eProvs	YOR168W	GLN4	0	-0.461542	-1.71753	-1.11489
TCTCAGCCGACGACATCAAC	neStops	YPL101W	ELP4	0	-0.0381215	-0.433325	-1.11418
CTTCCCAAAAAGTATTACCG	neProvs	YPL104W	MSD1	0	-0.466613	-0.777126	-1.11383
GGAACCGTAAATATCACCAC	neProvs	YDL185W	VMA1	0	-0.205568	-0.388382	-1.11325
TACAGGTCACTCTCAAGGTT	eProvs	YKL182W	FAS1	0	-0.389756	-1.12421	-1.11319
GGGACCTGCTTGCTGGATGT	eProvs	YHR074W	QNS1	0	0.00894621	-0.273006	-1.11275
CTGCTTCCAAGAATTCAACT	neStops	YOR080W	DIA2	0	-0.32171	-1.07685	-1.10985
GATGTCTGTTCTCGGTACTC	eProvs	YOR260W	GCD1	0	-0.221681	-0.460736	-1.10937
ATTACAGATCCAGTTAAATA	neProvs	YMR307W	GAS1	0	-0.678726	-0.670609	-1.10827
GAGTCAAACTTCCATAGACA	neStops	YNL059C	ARP5	0	-0.265253	-0.291519	-1.10339
AAACCGTGCAAAGGCGCTAA	eProvs	YDL102W	POL3	0	-0.118015	-0.708014	-1.1031
GCACAAGTACCCCTGTATCT	neStops	YNL250W	RAD50	0	0.153854	-0.497508	-1.09954
ATCATTCGCCCAAACCTTCT	eProvs	YIR008C	PRI1	0	-0.559436	-0.826678	-1.09833
GTACCAGGCAAGATATTTGT	neStops	YGL206C	CHC1	0	-0.496599	-0.677706	-1.0982
AAACTCATCCCACTATAGCA	eProvs	YIR012W	SQT1	0	-0.226927	-0.516744	-1.09711
AGGTCCCAATCGAAATTTGG	neStops	YBL093C	ROX3	0	-0.188783	-0.440568	-1.09558
ATGGTACAGTCCATAAAGGA	neStops	YBL079W	NUP170	0	-0.535033	-0.659326	-1.0922
GACTTACAACGGGTACCCAA	eProvs	YNR053C	NOG2	0	-0.474071	-1.22469	-1.0911
GAACCTACTTCTGGTAACAC	neProvs	YGR155W	CYS4	0	-0.569022	-0.655097	-1.08777
GCACAGCATAACGTTTGTGT	eProvs	YBR265W	TSC10	0	-0.292658	-0.878258	-1.08533
AATATACCGTGATTTGAAGT	eProvs	YBL105C	PKC1	0	-0.629359	-1.34033	-1.07967
ATTTCAATGCCTGTCGCTTT	eProvs	YHR164C	DNA2	0	-0.231989	-0.749263	-1.0784
ACCTCCTCCAAATGATTATC	eProvs	YJL054W	TIM54	0	-0.278115	-0.675079	-1.07737
GTTTCTCCCAATGGTCTGAG	eProvs	YOL038W	PRE6	0	-0.802635	-1.14427	-1.07736
ATACCACGTAGTTGTTCGTC	eProvs	YNL163C	RIA1	0	-0.338629	-0.541093	-1.07657
CTTTCCCTACACCAATAGGT	neProvs	YNL231C	PDR16	0	-0.904742	-0.626113	-1.07511
TTAACTATTGAGGATGGAAC	eProvs	YNL312W	RFA2	0	-0.84936	-0.66515	-1.07435
CCTGTTCAAAAGACAGGAAA	neStops	YBL007C	SLA1	0	-0.862729	-1.02135	-1.07244
TATCCTTGGCGCTATGGAAA	eProvs	YBR243C	ALG7	0	0.0595296	-0.542802	-1.07122
ACAACAGAGAGCGTTCCTCA	neStops	YIL033C	BCY1	0	-1.7408	-1.25597	-1.06969
CTATCAGATTAATTCATATT	neStops	YNL192W	CHS1	0	-0.532115	-0.982697	-1.06887
GAAGTAACCCCAAACATTAG	eProvs	YNR016C	ACC1	0	-1.5624	-2.23015	-1.06796
TATCCAGCCGTATCATCCGA	neStops	YKR024C	DBP7	0	-0.469455	-0.522603	-1.06576
ACACATCAAAGGGGTCCGAA	neStops	YPL075W	GCR1	0	-0.637067	-1.40332	-1.06503
ATCCCCCCAAAGCTTTCCTG	neStops	YGL063W	PUS2	0	-1.29173	-1.2387	-1.06498
ACCACCGGTGGACCCCAACG	eProvs	YMR296C	LCB1	0	-0.77695	-0.562621	-1.06362
GATCCAATGGCTGTGCAATG	neStops	YCR047C	BUD23	0	-0.629494	-1.4403	-1.06233
TACAGTTCCAGTGAAAACAG	neStops	YLR148W	PEP3	0	-0.45255	-0.616635	-1.0622
GAAACATCGTTAACTATACC	eProvs	YMR128W	ECM16	0	-0.0577839	-0.703853	-1.0583
ACTTCTGTGGTGATCTTGAC	eProvs	YDL143W	CCT4	0	0.0353711	-0.279231	-1.05588
CAGATCCAGGTGGCCCACAA	neProvs	YKR054C	DYN1	0	-0.0575846	-0.379317	-1.05563
TTGCCCACTTCTTATTTCTA	neStops	YGL206C	CHC1	0	-0.860568	-1.34546	-1.05495
TAAACCCAGAAGTACTACCA	eProvs	YIL150C	MCM10	0	-0.459711	-1.03748	-1.05481
TTCCATTCTGGTATTCTGAC	neProvs	YER019W	ISC1	0	-0.452119	-0.846668	-1.05412
TCTCACCCAAGTTTCATCCT	neStops	YPR164W	MMS1	0	-0.0744141	-0.693348	-1.05384
TCTTCAAAAGAATGAGGTCT	neStops	YDR049W	VMS1	0	-0.569073	-0.973425	-1.05243
TACACATAGAGATTTAAAGC	neProvs	YGR092W	DBF2	0	-0.0757592	-1.13648	-1.05205
ACCAAACCATTTGAAGACAC	neStops	YGL234W	ADE5,7	0	-0.112605	-0.900009	-1.05149
CCAACCCAAATTGTCAGGAC	eProvs	YNL247W	YNL247W	0	-0.564866	-1.29249	-1.05087
TACCTCACCAGCTACATGTC	eProvs	YPL122C	TFB2	0	-0.945871	-1.30024	-1.05052
ACAGCTCAGTCACTTCATTT	neStops	YPL097W	MSY1	0	-0.356022	-0.444791	-1.05003
GATATACAGGATCCAAATTT	neStops	YOR322C	LDB19	0	-0.268139	-0.375453	-1.04971
TTCGTCATATTCACTGTGGT	neProvs	YDR349C	YPS7	0	-0.280874	-0.331274	-1.04635
CTCCAGAAAGCAGCAATGGC	neStops	YIL053W	GPP1	0	-0.023667	-0.649955	-1.04591
TCATACCATGCTCTTTCCTG	neStops	YNL227C	JJJ1	0	-0.0223542	-0.153913	-1.04497
TTTACCACCAGAGGCCCCCA	neProvs	YGL211W	NCS6	0	-0.185389	-0.131976	-1.04484
AAATATCCATTGGGCTCCGG	eProvs	YOR168W	GLN4	0	-1.02499	-1.92097	-1.04388
TAGCCTACTTCCTTACCCAA	eProvs	YKR086W	PRP16	0	-0.223361	-0.636288	-1.04176
GCAAAGCCGGTGGTCCTACC	eProvs	YKL082C	RRP14	0	-0.507751	-0.536854	-1.0417
GTTTGCCGTACATACGGGTT	eProvs	YPL160W	CDC60	0	-0.27428	-0.835096	-1.04142
AGGACCACCTTCAGCGGCTT	eProvs	YJR016C	ILV3	0	-0.246887	-1.16752	-1.04052
GCAGGATCAATTGGATGTTT	neStops	YNL243W	SLA2	0	-0.0714599	-0.496332	-1.03796
ACCACCAACCATATCGTATG	eProvs	YGL048C	RPT6	0	-0.78766	-1.16507	-1.0375
ATACCAGGAACGTTGGGAGG	eProvs	YNL216W	RAP1	0	-0.296406	-1.20139	-1.03705
TATCCCTTCTAAGGATTGGA	eProvs	YOR373W	NUD1	0	-0.235815	-0.745564	-1.03435
ATCTAGACCACCCATAATAC	eProvs	YDL014W	NOP1	0	-0.897569	-1.52955	-1.03366
GATCACAGTCACATTTAACG	neStops	YPL125W	KAP120	0	0.0113687	-0.35244	-1.03353
TCTCGCCTATACACAGTAAC	eProvs	YDR531W	CAB1	0	-0.156572	-0.819922	-1.03342
CAATTCATTTACTATTTGGG	eProvs	YLL031C	GPI13	0	-0.418152	-0.167636	-1.03153
TTCCTTCGCCAGCATCAGCC	eProvs	YDR160W	SSY1	0	-0.188742	-0.366205	-1.03051
GTACCTCTTGTGTAACGAGG	eProvs	YJR016C	ILV3	0	-0.552567	-1.35075	-1.03014
CCTGATTCAGAATCAAATCA	neStops	YNL139C	THO2	0	-0.177835	-0.723241	-1.02983
AAGCCTTCCTCTGCTCTGAT	eProvs	YJR016C	ILV3	0	-0.111506	-1.22196	-1.02723
CTATCTTATATTTCCGCATT	eProvs	YOR207C	RET1	0	-0.535689	-1.5311	-1.02716
TCCACATATATCTAAATCCA	eProvs	YGL091C	NBP35	0	-0.193255	-0.854419	-1.02711
AACTCTTTGCCTTTATCTAC	eProvs	YGL074C	YGL074C	0	-1.28704	-1.51024	-1.02674
GTTTCTTTCGCCTACGTGGA	eProvs	YCL017C	NFS1	0	-0.0194269	-0.488804	-1.02622
CTTTCCAAACAACTACCATA	neStops	YMR016C	SOK2	0	-0.418502	-0.399107	-1.02588
AACCCAGACTTCGGAGATAA	eProvs	YKL203C	TOR2	0	0.213644	-0.387826	-1.02527
AAACCTGCAACAGCAAATAC	eProvs	YLR291C	GCD7	0	-0.324032	-0.448304	-1.02325
GTTACACAAAGTACCTTCCA	eProvs	YDR062W	LCB2	0	-0.528892	-0.85279	-1.02296
ACACAGGGAAATCCAATCCC	neStops	YIL036W	CST6	0	-0.254288	-0.669464	-1.01968
ATCATTCCCTTGGTGGCTTC	eProvs	YPR168W	NUT2	0	-0.160361	-0.233766	-1.01814
TGACCATGGGTCGACATCTC	neStops	YOL072W	THP1	0	-0.791264	-1.05012	-1.01783
AAATTCCCATCGGGAAAGTA	eProvs	YNL062C	GCD10	0	-0.478699	-0.119665	-1.01582
ACCAGCTCAATCCTTAGGTG	neStops	YGL167C	PMR1	0	-0.404031	-0.420759	-1.01441
CGCACCAAAGCACTACATTT	neStops	YMR153C-A	YMR153C-A	0	-1.19981	-1.12082	-1.0143
TTGATCCAGTCTGGGTTGGT	neStops	YPR074C	TKL1	0	0.271628	-0.153202	-1.01405
AAGCCTGCAAGATCCTGTGT	eProvs	YIL051C	MMF1	0	0.13613	0.138007	-1.01228
TTCCCACAATTCGCTTGGGT	neStops	YLR436C	ECM30	0	-0.285495	-0.727488	-1.01024
AACACCGAAATCGACCCAAT	eProvs	YGL008C	PMA1	0	-0.867638	-0.979416	-1.0072
CTCCACGAATGGCATGTTGT	neProvs	YLR420W	URA4	0	0.0195275	-0.913376	-1.00626
TATATAGCATTCGTATACAT	neProvs	YER111C	SWI4	0	-0.890851	-0.579669	-1.0062
TAGACCGAAGAACCCGCTCA	eProvs	YPR183W	DPM1	0	-0.0103986	-0.904036	-1.00506
TCACCAAGACGCCATTAAGA	neStops	YNL104C	LEU4	0	-1.04939	-1.23616	-1.00355
ACCACAATTATTACCAATGT	neStops	YFL036W	RPO41	0	-0.206059	-0.21956	-1.00325
CTAGAACACTTGGCTTTCAA	eProvs	YLR163C	MAS1	0	-0.6671	-1.09706	-1.00322
CCTTCAAGGCTCCCTAATTA	neStops	YMR190C	SGS1	0	-0.559152	-0.637558	-1.00267
GTCACCATGAATAGCCAAGG	eProvs	YNL112W	DBP2	0	-0.735743	-0.723647	-1.00264
CCTCCCCCCCTTATATTGAG	eProvs	YPL128C	TBF1	0	-0.191586	-0.400913	-1.00168
ATCGCACATCTACTTTGCAG	eProvs	YOL094C	RFC4	0	-0.0555947	-0.594987	-1.00168
CATACAATGTCTGGACGTTG	neStops	YMR231W	PEP5	0	0.136048	-0.321168	-1.00157
ATCGTTCAAAAGATGTACGG	neStops	YGR204W	ADE3	0	-0.226725	-0.507782	-1.00048
ACTACCGTTACTTCGAAACT	eProvs	YDR044W	HEM13	0	0.277165	-0.310065	-0.99722
TATATATCCATCACATCCTG	eProvs	YMR131C	RRB1	0	-0.536635	-0.536857	-0.995315
ATCTTGTCCCATGGAGATAC	eProvs	YLR197W	NOP56	0	-0.1951	-0.503086	-0.994922
TGTCTAAGAGAAAGTTACAA	eProvs	YGL245W	GUS1	0	0.221674	-0.332811	-0.994836
CTATCCAGATTCTCCCCCAA	neProvs	YGL087C	MMS2	0	-0.202561	-0.530199	-0.994072
CGTGACCTCTCATCCAGATA	eProvs	YHR069C	RRP4	0	-0.481638	-0.987988	-0.993637
ATTCCCATTGTGTGTCCATT	eProvs	YLR075W	RPL10	0	-1.22027	-1.68005	-0.992413
TGAACCTATAGTCACGCAGC	eProvs	YMR043W	MCM1	0	-0.326201	-1.12792	-0.99228
CGTCACATGACCGAGTTTAC	eProvs	YLL018C	DPS1	0	-0.21339	-0.863428	-0.991701
ATGCATGTTCATGTAAGAGA	neProvs	YLR420W	URA4	0	-0.0634945	-0.74659	-0.991595
ATCTTCACCAACGATGACAC	eProvs	YKL060C	FBA1	0	-0.81423	-1.2877	-0.991022
TTACCAAAATGATTATCCGG	neStops	YDL115C	IWR1	0	-0.326138	-0.749459	-0.989539
AAAACCAAACCCCATTGACA	eProvs	YPR112C	MRD1	0	-0.534069	-0.772527	-0.988374
CCACCATAATGACCTTGATA	eProvs	YDR037W	KRS1	0	-0.343175	-1.22648	-0.985503
CAAGTACACAAGAAGCGATA	eProvs	YDL045C	FAD1	0	0.165162	-0.327434	-0.985496
ATTAAAGCCTAGATCATCCT	eProvs	YLR129W	DIP2	0	-1.02318	-1.47814	-0.985128
ACAATCACCAAAGTATTAAA	eProvs	YJL087C	TRL1	0	0.179561	-0.991132	-0.983262
TGAACATATATCGATTGCAG	eProvs	YIL003W	CFD1	0	-0.0291887	0.0455983	-0.982218
TATCCGATTTCACTCTTTGG	neProvs	YCR094W	CDC50	0	-0.448949	-1.09957	-0.980815
CAACGCTCAAAGCGCTAATA	neStops	YNL098C	RAS2	0	-0.393564	-0.619038	-0.980236
AATACTCACATCGCCATCGT	eProvs	YGL022W	STT3	0	-0.44738	-0.816367	-0.976116
CTTCCCACGGAACTGATCTA	neProvs	YKL216W	URA1	0	-0.380209	-1.32897	-0.975574
TACCCCTATAATAGATATAG	neProvs	YGR242W	YGR242W	0	-0.772683	-0.536689	-0.974753
TGTGGGCATATTAGTTTACC	eProvs	YNL232W	CSL4	0	-1.21068	-1.4355	-0.971562
TTCTTGTCCATGGGGGCACT	neStops	YPL086C	ELP3	0	0.0216277	-0.654945	-0.970346
GCGTACCAGTTAATAAAAGG	neProvs	YAL019W	FUN30	0	-0.0909931	-0.251556	-0.969523
CACACCATCCTTAAATGTCA	eProvs	YJL001W	PRE3	0	-0.549269	-0.572805	-0.968477
CACTAAACCGGTAGCATCAC	eProvs	YMR093W	UTP15	0	-0.601138	-0.977733	-0.968079
GAACCATTCACAGTTATGGT	neStops	YBR200W	BEM1	0	-0.271369	-0.485144	-0.966753
TTGCATCATCACTACTTTAT	eProvs	YGR060W	ERG25	0	-1.05928	-1.80077	-0.965426
CAAATCACCATGTAGCGCAG	eProvs	YHR065C	RRP3	0	-0.606618	-1.3252	-0.964489
TTTACAAGGCGATGATAAGG	neStops	YMR294W	JNM1	0	-0.35389	-0.661069	-0.962002
ACCGCCCAATCAGTATGACC	neStops	YIR029W	DAL2	0	-0.260072	-0.437497	-0.961799
CCACCACCAATGACGGCCAA	eProvs	YDR353W	TRR1	0	-0.18972	-0.715574	-0.960454
GGCACAAACCATTCTGTCCA	neStops	YJR113C	RSM7	0	-0.480387	-0.525474	-0.960284
ATATTCTATGGCCGGTTCAG	eProvs	YDR232W	HEM1	0	0.271273	0.285054	-0.959103
ATAACACCAACGGATTTAAC	neProvs	YMR217W	GUA1	0	-0.306906	-0.96595	-0.958805
TACCAATACGATTCATACCT	eProvs	YHR068W	DYS1	0	-0.126865	-0.376088	-0.957664
CTCATCCAGGGTTTGGCTGT	eProvs	YFR004W	RPN11	0	-0.624737	-1.01568	-0.956181
GTCCAACTTTCCGAACCTGC	neStops	YDR004W	RAD57	0	0.00663376	-0.381108	-0.956149
CTCAACCGAGAATTAACAGA	neStops	YIR005W	IST3	0	0.0525693	-0.29359	-0.955158
AACACCATCTTCTTCACCAC	eProvs	YKL060C	FBA1	0	-0.46432	-0.726406	-0.954859
TCTACCAACGACAACACCTT	eProvs	YNR016C	ACC1	0	-0.605498	-1.32584	-0.954708
TGAACCACAGCAAATTCTTA	neStops	YJR122W	IBA57	0	-0.235152	-0.465057	-0.954596
TTGCAACAGGCGGTGACGAC	eProvs	YDR267C	CIA1	0	0.218928	-0.437877	-0.954033
TCTTCTTCCACTGTTAAGAG	eProvs	YGL008C	PMA1	0	-1.11707	-1.41174	-0.953607
GGGACAAAAGATCAGGATAA	neStops	YFL016C	MDJ1	0	0.184712	0.399611	-0.951021
TTTCCCCTCATATCTATATA	eProvs	YER171W	RAD3	0	-0.497355	-0.952711	-0.949748
AACCCACTGAATCCTGAAGC	neProvs	YLL007C	LMO1	0	-0.111374	-0.329193	-0.94972
GAATACCTCTAACCAAACCC	eProvs	YPL242C	IQG1	0	-0.685243	-1.40595	-0.949411
TGCATTCCAGTAAACACCAG	neStops	YOR323C	PRO2	0	-0.36567	-1.13075	-0.946394
AATCACAAATTTGTAAACCT	neStops	YGR270W	YTA7	0	0.053104	-0.224131	-0.945492
TTCTGTCGCGTGATGAAAAT	eProvs	YMR277W	FCP1	0	-0.0656383	-0.57305	-0.945343
ATATCTCAGGTCGCTTTATT	neStops	YHR012W	VPS29	0	-0.614676	-0.820742	-0.945148
GACGTTTCCTGGGGTACTAA	eProvs	YBR038W	CHS2	0	-0.980385	-0.986727	-0.945121
TCACAGTTTAACCTAATGTC	neStops	YDR389W	SAC7	0	-0.333898	-0.600136	-0.945011
GCTTTCCGATTTAAGCACCT	neStops	YDR137W	RGP1	0	0.0101448	-0.38243	-0.942498
CTACCAGGAACACCAGTAGT	eProvs	YDR062W	LCB2	0	-0.540934	-1.11439	-0.942414
AGTCTCCCACTGCTTCAAAC	neStops	YGL012W	ERG4	0	-0.191556	-0.530138	-0.941017
TAATGGACCATATAGAGCAT	eProvs	YLR153C	ACS2	0	-0.378881	-1.31031	-0.94097
ACCACCCATAGTAGATTTAC	eProvs	YDR172W	SUP35	0	-0.482841	-1.10212	-0.934996
GTATCTCTTCCGTTTATCTT	neProvs	YHR157W	REC104	0	0.105732	-0.154122	-0.933934
ACATTATCCATTGATCCTTC	eProvs	YMR049C	ERB1	0	-0.0144463	-0.698901	-0.933728
GTAACACTTAGATGGTACAC	eProvs	YGR065C	VHT1	0	-0.362197	-0.99154	-0.933445
CGGACCAGGTACCTAAAACA	neStops	YPR135W	CTF4	0	-0.1681	-0.359774	-0.933255
ACTCGTGGATTGGTTACGTG	neProvs	YLR342W	FKS1	0	-0.293146	-0.40146	-0.932446
GAAGAACAAGACGGGGAATC	neStops	YNL215W	IES2	0	-0.260556	-0.34426	-0.931783
AATGCCATTCGATATGACAA	neStops	YMR058W	FET3	0	-0.193859	-0.579672	-0.931608
ACTACACGACACGCAGATCG	neProvs	YHR200W	RPN10	0	-0.160294	-0.630608	-0.930988
TTCCCACCAAAACGTCCACC	eProvs	YAR008W	SEN34	0	-0.067746	-0.398792	-0.930555
GCTCCAGAAGTGATCATGGA	eProvs	YHR102W	KIC1	0	-0.360439	-0.952272	-0.930167
AATCACAGGAGCAACAGCGA	neStops	YBR131W	CCZ1	0	-0.234819	-0.303632	-0.930102
ATGCCAATCGGACTTCATGT	neStops	YBR267W	REI1	0	-0.240588	-0.172231	-0.930056
CCGTTACAAAAAGCCGTAAG	neStops	YOR290C	SNF2	0	-0.662054	-0.905692	-0.929918
TGATCCCTTTGATCTGGATG	eProvs	YCR057C	PWP2	0	-0.356503	-0.265209	-0.929435
TGATCCTGTAGCCTTATACT	eProvs	YBR154C	RPB5	0	-0.307455	-0.49759	-0.927046
TGGTTCAGAAACAGTAAAAC	eProvs	YMR220W	ERG8	0	0.0363292	-0.808645	-0.922471
TATTCCACAAGAATTAGTAT	neStops	YML121W	GTR1	0	-0.500148	-0.797647	-0.921386
GTTATCCAAAACAGTCAACA	eProvs	YEL032W	MCM3	0	-0.254166	-0.313809	-0.921113
CCACAATGAGGTCTTCCAGT	eProvs	YGR185C	TYS1	0	-0.345813	-0.883802	-0.920385
CCAATTTCATGCCCCTTAAT	eProvs	YKL182W	FAS1	0	-0.428742	-1.15112	-0.919096
ATCACTGGAACAAAAGGTAA	neProvs	YOR241W	MET7	0	0.131495	0.175169	-0.917869
GTTGGCCAGCTATTTATTGT	neStops	YKL139W	CTK1	0	-0.0613415	-0.586578	-0.917197
ACCGGAACAGTACTGCTATT	eProvs	YGL074C	YGL074C	0	-0.881278	-1.12889	-0.916497
ATTCACCTGAAAAGGGGTCC	eProvs	YER172C	BRR2	0	-0.205235	-0.768899	-0.916026
TGACGCACAAGGGGAGAGAG	neStops	YDR281C	PHM6	0	-0.990764	-1.04827	-0.915259
AATACAGATTCCTGTTTCTA	neStops	YPR135W	CTF4	0	-0.170198	-0.285225	-0.914621
GTGACACAAGGAATGGTTCA	neStops	YLR382C	NAM2	0	-0.253481	-0.3838	-0.913918
CCAGCAAATTCGTTTGGATA	neStops	YDR195W	REF2	0	-0.440297	-0.698493	-0.913491
TTCACTGAAATAAGAAAAGG	eProvs	YLR140W	YLR140W	0	-0.819745	-1.29897	-0.912637
TTTCCCCTAAAAATAATTGA	neProvs	YER186C	YER186C	0	-0.401821	-0.66661	-0.910824
TTATTCAAATTGTTCAAAAT	neStops	YJL183W	MNN11	0	-0.233125	-1.00682	-0.909952
CCTTCACCAACGATAATATC	eProvs	YNL251C	NRD1	0	-0.387385	-0.698622	-0.909601
ACTCAAGATTTAATAAATGA	neStops	YER016W	BIM1	0	-0.428412	-0.403802	-0.909466
TACCCAATCACGATAAGCTT	neStops	YNL291C	MID1	0	-0.0898994	-0.663133	-0.908029
CAAAACAGGGCTGGGCTCCT	eProvs	YMR220W	ERG8	0	0.101056	-0.291269	-0.907791
GATAACCCCAGACCCATACC	eProvs	YGR280C	PXR1	0	-0.398248	-0.650654	-0.905973
CGTTCAAAACTTAGCTAATT	neStops	YML008C	ERG6	0	-0.240018	-0.484243	-0.905419
GTCCCCTGACGGAACCACAT	eProvs	YGL116W	CDC20	0	-0.970277	-0.92993	-0.905134
CATCAACCCCATGACTTCCA	eProvs	YFR004W	RPN11	0	-1.19579	-1.49346	-0.903339
ATACCCATACGCTTATATGG	eProvs	YMR108W	ILV2	0	-0.211361	-0.334767	-0.902876
GAACGATGGAGGGAAGAATA	neStops	YKL091C	YKL091C	0	-0.0161428	-0.844676	-0.902196
CAATATTCCAGTCGATGAAA	neStops	YLL049W	LDB18	0	-0.348765	-0.450284	-0.900409
AAACCAGTTGTTCCAATGAA	neStops	YNL236W	SIN4	0	-0.778243	-0.239909	-0.897524
TTTCCATAGTGATGGCTTAG	neStops	YGL084C	GUP1	0	-0.147451	-0.0608711	-0.896681
ACCGTCACCCAAGAAAACAT	neProvs	YPR074C	TKL1	0	-0.508071	-0.54105	-0.895799
CAGGACTGAATCTAAATTCA	eProvs	YGR098C	ESP1	0	-0.590297	-1.51885	-0.894533
GAATACCCTCCTGATCAAAT	neProvs	YDR470C	UGO1	0	-0.302181	-0.489958	-0.89452
GTCCGTCATCACGTATACGG	eProvs	YDR473C	PRP3	0	-0.0702769	-0.786989	-0.894391
ATACAATATATGGGATCTAT	eProvs	YPR176C	BET2	0	-0.014213	-0.651296	-0.893193
ATCTTCCATTTGAAGCTACT	eProvs	YPR112C	MRD1	0	-0.384979	-1.15354	-0.892648
GCTTCCAAACATGGCATACT	neStops	YNL326C	PFA3	0	-0.064424	-0.385214	-0.892266
TGCCACCGTGGAGCGTGCTA	eProvs	YDR211W	GCD6	0	-0.0919867	-0.226386	-0.891645
ATTGTGCAAGAATTATTGGG	neStops	YDR161W	ACL4	0	-0.774319	-0.831869	-0.891538
TACGACCCAAAGAAGCAGGA	neProvs	YNL191W	DUG3	0	-0.480186	-0.56238	-0.89061
AATATCACCTGCATAACTTA	eProvs	YGR046W	TAM41	0	-0.170481	-0.149521	-0.88956
ATAGCCCAAAATCGGGAATC	neStops	YLL007C	LMO1	0	-0.233758	-0.257352	-0.889371
ACGGCCTCCTCTCATCACTG	eProvs	YLR277C	YSH1	0	-0.361584	-1.20791	-0.888635
CAGGTTCAAGTTATCTTCCT	neStops	YER120W	SCS2	0	0.0573371	-0.294162	-0.888564
AAGTCAATGTAATATTAAGG	neStops	YPL174C	NIP100	0	-0.330727	-0.0213837	-0.886438
GACCCACGTAGCGTTCATGT	neStops	YLR350W	ORM2	0	-0.345562	-0.663832	-0.885552
AAACCTTTGTACTCATTTGG	eProvs	YDL205C	HEM3	0	0.286364	-0.0447488	-0.885137
ATTCTCAACAACTGCGTACG	neStops	YCR081W	SRB8	0	-0.103279	-0.504637	-0.884022
TTTCTTTCTGTGTGGAAGAT	eProvs	YGL225W	VRG4	0	-0.0114555	-0.608324	-0.88352
TCCACCAAAATTGGGTACTT	eProvs	YLR223C	IFH1	0	-0.321368	-0.315263	-0.883267
AACTCTTCTTGTTATTTCTT	eProvs	YIL078W	THS1	0	-0.42736	-2.04425	-0.882981
TCAGACCCTACTATGGCAAA	eProvs	YHR107C	CDC12	0	-0.566637	-1.00471	-0.882861
TTTACAAACATGGTGTGATA	neStops	YGR157W	CHO2	0	-0.136321	-0.765533	-0.882622
TCACGACCTGACATAATAGC	eProvs	YBR237W	PRP5	0	-0.164307	-0.464093	-0.881766
TACCACTCGCTATCAGAGGA	eProvs	YBL035C	POL12	0	-0.12341	-0.390423	-0.881429
GTTTCCTAAGAAGAATCTGA	eProvs	YGL112C	TAF6	0	-0.608582	-0.944778	-0.880793
ACTTTCCTAACATAGCAATC	eProvs	YHR165C	PRP8	0	-0.307924	-0.481881	-0.8807
GTCCCCTAAACGATGATATA	neProvs	YPL053C	KTR6	0	-0.863221	-1.11026	-0.878165
TATGCATGTTCATGTAAGAG	neProvs	YLR420W	URA4	0	-0.0125331	-1.07523	-0.87767
AACCCAAGTAGTGTACCAAA	eProvs	YDR160W	SSY1	0	-0.0595296	-0.260617	-0.876916
TGTTCAACAACTTGATCATC	neStops	YKL074C	MUD2	0	0.19992	-0.0612431	-0.875286
TCCTACACCAAGATCCATCA	eProvs	YJL091C	GWT1	0	-0.429349	-0.832552	-0.875086
AAGACAAGTTAGTTTACTAA	neStops	YNL297C	MON2	0	-0.247581	-0.476578	-0.874851
ATGATTTCTCAAGGCACTGC	neProvs	YJL186W	MNN5	0	-0.263943	-0.396052	-0.8744
GAGTCAAGAAAGTGAAGACG	neStops	YLR079W	SIC1	0	-0.315801	-0.679986	-0.873868
ATCACTACAAAATGACGAGC	neStops	YGR067C	YGR067C	0	-0.158906	-0.214249	-0.87272
ACCCAGACTTCGGAGATAAT	eProvs	YKL203C	TOR2	0	-0.214816	-0.665671	-0.872462
TTCTTCCAATCTCTATACGA	neStops	YBR179C	FZO1	0	-0.196731	-0.106299	-0.872223
GACTTCCAACCTCCTTCTTC	neStops	YPR074C	TKL1	0	-0.126213	-0.30205	-0.872207
ATCCCAAGAGCAGTAAGTAG	neStops	YLR069C	MEF1	0	-0.190864	-0.277718	-0.871861
TTTATACCGCCGTCAGTAAC	eProvs	YKL022C	CDC16	0	-0.564639	-0.729426	-0.871224
ACGGAACAGGTACGCGGTTA	neStops	YGR252W	GCN5	0	-0.516597	-0.603944	-0.870822
AGACCAAACCAAGTCTGCCA	neStops	YNR032W	PPG1	0	-0.385226	-0.60163	-0.870802
GAGTTTCAAGGTAACGTCAT	neStops	YLR069C	MEF1	0	-0.206508	0.147585	-0.870044
ATACCGAAAATCGTCCCCAT	neProvs	YOR330C	MIP1	0	-0.366201	-0.359606	-0.868589
TTCCCACAGTACTTCTACCA	neProvs	YJL023C	PET130	0	-0.507058	-0.522803	-0.86854
GATGATCAAGAGTCTATTTG	neStops	YDL077C	VAM6	0	0.0156424	-0.370219	-0.868105
TATTCAGTCACCTTTGTACA	neStops	YML103C	NUP188	0	-0.582713	-0.847767	-0.866894
GATCTTCAAACTATACGAGA	eProvs	YCL004W	PGS1	0	0.0867105	-0.0122433	-0.866408
GACACTTCCAAAAGTTAAAG	neProvs	YML061C	PIF1	0	-0.216625	-0.741153	-0.863848
TATCCCATCCTTTGGTATTG	eProvs	YOR244W	ESA1	0	-0.0807025	-0.417821	-0.863106
GGTACGTCTGTGCGTATGAT	neProvs	YER086W	ILV1	0	-0.140007	-0.634541	-0.862927
TCTTCCTGGTGTTCCGCTAA	eProvs	YDR021W	FAL1	0	0.186544	-0.269597	-0.858782
GATACAAGAGATTGTTCCGC	neStops	YOL072W	THP1	0	0.00539619	-0.337881	-0.85836
CATACCATGCTCTTTCCTGG	neStops	YNL227C	JJJ1	0	0.0437727	-0.16198	-0.857694
TCATCAATACAAACCACAAC	neStops	YNR006W	VPS27	0	0.0632768	-0.383791	-0.856309
GTCACCCTACCCGTGTGATC	neProvs	YBR286W	APE3	0	-0.248479	-0.622137	-0.855636
GTTAACATGGGCAGCTTCAA	eProvs	YML065W	ORC1	0	-0.245443	-0.0539779	-0.855196
ACCCCAATTGGTTCATTCCA	eProvs	YPL028W	ERG10	0	-0.021512	-0.350424	-0.855186
TCCCCACTACATATTCTTCA	neProvs	YBR003W	COQ1	0	-0.41706	-0.405889	-0.854981
CTACCGTTTAGTCCACCTTC	eProvs	YPR176C	BET2	0	-0.141805	-0.845654	-0.853139
TCTTCATCAATGAAATCTGT	neProvs	YJL130C	URA2	0	-0.172899	-0.368723	-0.852851
GTGCCTTCAAATCAACGCCA	neStops	YMR185W	RTP1	0	-0.13264	-0.0303038	-0.852494
CTCAAACCACTCCAAATGCA	eProvs	YPL012W	RRP12	0	0.0702402	-0.554402	-0.852434
TGAACATTTCGTTGACCCAT	neProvs	YBR121C	GRS1	0	-0.0631795	-0.357963	-0.851786
TTCCCCCTCCGAATCACAAC	eProvs	YFR051C	RET2	0	-0.0306024	-0.263652	-0.851721
TGTACGGATTTGGCCTCCAG	eProvs	YLL008W	DRS1	0	-0.263975	-0.967176	-0.850319
GCATAAACCATCTTTGAACG	neStops	YDR414C	ERD1	0	-0.0801726	-0.138365	-0.850233
CCACCTCACTTAAGCCCATG	eProvs	YGR103W	NOP7	0	-0.26312	-0.473238	-0.849913
GCACTACCTGCTTTATAAAT	eProvs	YDL164C	CDC9	0	-0.356434	-0.393899	-0.849149
ATCTTCAGAGACGTGTGGAA	neStops	YLR188W	MDL1	0	-0.281298	-0.877931	-0.848451
AAGAGACCCAAATCAGACAA	eProvs	YOR244W	ESA1	0	-0.092547	-0.661128	-0.84746
ACGTGACCGTGCATAGGAGC	eProvs	YGR175C	ERG1	0	-0.11503	-0.185266	-0.847212
TATACCATTACCAGTAACAT	eProvs	YLR409C	UTP21	0	-0.773968	-0.898058	-0.84482
GCATATCTAGGCAACGCTCA	neProvs	YPL040C	ISM1	0	-0.147957	-0.370761	-0.844383
TTCATACCTAGCAAAGCAAC	eProvs	YJL026W	RNR2	0	-0.140189	-0.521704	-0.843201
TTCTCACCGAATGCTAATTA	neStops	YMR021C	MAC1	0	-0.652661	-0.512563	-0.842502
GGTGGTACCGGTTCCGGTAT	eProvs	YFL037W	TUB2	0	-0.602397	-1.45215	-0.84244
TCCCCATGTCGAGATGACGT	neProvs	YLR030W	YLR030W	0	-0.371696	-0.258277	-0.840963
ACACCCTGATCCACCTCTGA	eProvs	YNL102W	POL1	0	-0.140628	-0.650974	-0.840035
ACTACTATGTTCTTACCAAA	eProvs	YGL008C	PMA1	0	-0.900357	-0.66363	-0.838915
ATGACCAGGATGCCTATTGG	neStops	YAR014C	BUD14	0	-0.120629	-0.494931	-0.837708
TTCCACACCCTGCAGAACAA	neProvs	YOR208W	PTP2	0	-0.274808	-0.760312	-0.835388
GCAATACATTGAATCAAACT	eProvs	YLR249W	YEF3	0	-0.252017	-0.338723	-0.833181
TTGACCATATACGGACTGTT	neStops	YKL213C	DOA1	0	0.000655315	-0.188305	-0.832889
GGATCAAGATGAGTGCAAAA	neStops	YBR098W	MMS4	0	-0.226832	-0.209186	-0.831526
ACCCAATGATAGTTACCAAG	eProvs	YMR001C	CDC5	0	-0.705482	-1.2683	-0.83084
CTATTTCTTTCATTCTGCCC	neProvs	YER119C	AVT6	0	-0.0705029	-0.766796	-0.829999
GCATCCAAAGGAAGTTCTTT	neStops	YGR262C	BUD32	0	0.160808	-0.592341	-0.829975
ATAACCATTTCTCATAACAA	eProvs	YPL218W	SAR1	0	-0.0865576	-0.699042	-0.829944
AACCAACAGGACTTTGATAA	neStops	YHR194W	MDM31	0	-0.241975	-0.39085	-0.829614
ATGTCCTCTGGTTTGGAAAT	eProvs	YNL118C	DCP2	0	-0.250991	-0.236847	-0.829301
CCACCGAAAGTACCATGGTT	eProvs	YPL231W	FAS2	0	-0.836654	-1.27753	-0.828842
CCGCCAGGTCGCAGTAGCGT	eProvs	YGL169W	SUA5	0	-0.204659	-0.757233	-0.828303
CGTGACCAGGATGATACATA	neStops	YDR120C	TRM1	0	0.0564979	0.00322165	-0.828164
TTCTCGAACTAAAGCATTGA	neStops	YDR159W	SAC3	0	-0.16193	-0.325033	-0.82806
AAATCCAAATACAAATAACA	eProvs	YLR086W	SMC4	0	0.00105324	-0.0771576	-0.828004
ATAATCTCCGCGCCCAGGTC	eProvs	YKL045W	PRI2	0	-0.377471	-1.0393	-0.827817
TCCCAAGGTTGTTCATTACC	neStops	YGR061C	ADE6	0	-0.631318	-0.602498	-0.827686
TTACCTACAGCTCTTAAAGC	eProvs	YNL189W	SRP1	0	-0.428917	-0.430669	-0.826878
AGTTCACCAACCTTTAAATA	neStops	YHR119W	SET1	0	-0.239609	-0.55167	-0.826776
TAAATTACCAATATGAGCCA	eProvs	YGR191W	HIP1	0	-1.18992	-1.1038	-0.825808
GATCGAATAATTGACAGAAG	neStops	YDL077C	VAM6	0	0.103323	-0.256315	-0.825141
GACCATATAAGATTCCAGCT	eProvs	YJR013W	GPI14	0	-0.281513	-1.11631	-0.824208
TTGAACCATTTAGAATAACT	neStops	YJL176C	SWI3	0	-0.277885	-1.15652	-0.82397
AACTTACAGTAGTTATCATT	eProvs	YHR068W	DYS1	0	-0.190086	-0.671642	-0.8237
TTCACCAAGAACAGCACGTT	neProvs	YER086W	ILV1	0	-0.374442	-0.746579	-0.82297
ACGGACCAAATAGAGATGGC	neStops	YKL213C	DOA1	0	-0.261446	-0.328589	-0.822914
TGGAACAATATTCCATATAA	neProvs	YAR018C	KIN3	0	-0.337316	-0.594601	-0.822192
AATTCCTCAACGGTAAGAAA	eProvs	YHR072W	ERG7	0	-0.099734	-0.40349	-0.82145
GGTCCCATTGAACTTCCCAA	neStops	YHL018W	YHL018W	0	-0.668578	-1.11239	-0.821304
GCACATTGATATGTGTTACG	eProvs	YOR207C	RET1	0	0.048526	-0.556703	-0.820319
ATTCCAATTCTATGATCATT	eProvs	YGR218W	CRM1	0	-0.119892	-0.221843	-0.818755
GGACCATAAAACAACATATG	eProvs	YJR068W	RFC2	0	-0.0914198	-0.393293	-0.818457
GTCCACCCGTGATGATCACG	neProvs	YHR139C	SPS100	0	-0.252037	-0.49112	-0.816923
GATTTCCAAAAAAATCCATT	neStops	YGR081C	SLX9	0	-0.221963	-0.5846	-0.816629
ATTTCTCCCAACGAGTTGTC	eProvs	YBR080C	SEC18	0	-0.80394	-1.46728	-0.815718
GTCATATCACACGCTGGAAC	eProvs	YGL047W	ALG13	0	-0.158268	-0.212371	-0.815046
TATCCCAACCACACAGGGTC	neProvs	YBL033C	RIB1	0	-0.497891	-0.364292	-0.81463
AACCAATCAACATTTAGTAA	neStops	YBR216C	YBP1	0	-0.17347	-0.0548953	-0.813212
CCAGGCCCAAACAGTGCTGA	neStops	YLR447C	VMA6	0	-0.0989432	-0.11459	-0.813107
GGTCCAACATCAAAGGATTG	neStops	YHR200W	RPN10	0	-0.308577	-0.640003	-0.812748
GGGACAACCACTACATCTAA	eProvs	YKR071C	DRE2	0	-0.982174	-1.44412	-0.812513
CTTCCCCAACACTTCATAAC	neStops	YLR040C	AFB1	0	-0.64136	-0.84317	-0.812428
CTTCCAAAGAAGGGATATTA	neStops	YER167W	BCK2	0	-0.944024	-0.470347	-0.811382
CGCTACCTGTTAGACCATCT	eProvs	YDR353W	TRR1	0	-0.0578686	-0.200833	-0.81102
GGTCTTTCAATACGATTCAG	neStops	YDR137W	RGP1	0	-0.156416	-0.223551	-0.810053
CTTTCACATTTGGCGGTAAC	neProvs	YGR224W	AZR1	0	-1.07119	-1.00942	-0.809529
ACGGCACGGCGAGTAAGAAT	eProvs	YAL001C	TFC3	0	-0.218452	-0.424584	-0.809293
ATCACCTCTGGCCAGCGACT	eProvs	YBR265W	TSC10	0	-0.244205	-0.915474	-0.809269
ACATTCCAATCTGTAATTTG	eProvs	YNL262W	POL2	0	-0.953137	-1.47384	-0.808601
AAAACTTTAGAAGGTTTCCT	eProvs	YBR029C	CDS1	0	-0.324496	-1.31927	-0.806381
ACGGCCCTGCGTAGTACCCA	neProvs	YPL029W	SUV3	0	-0.0812952	-0.774533	-0.806257
CCACCAACATTGTCTAAATG	neStops	YMR231W	PEP5	0	0.0596847	-0.164876	-0.805514
GGTCGTCAAGAAGCACGTAT	neStops	YKR020W	VPS51	0	-0.492206	-0.700731	-0.804699
TACCAGTTAGTCTTGGAGAA	neStops	YGL012W	ERG4	0	-0.0796079	-0.235258	-0.803756
CGACGGTCAAAAAAATGGAA	neStops	YLR182W	SWI6	0	-0.53013	-0.603395	-0.8037
CACTCCAGGCACCCCATTTA	eProvs	YOR048C	RAT1	0	-0.566106	-1.1185	-0.803402
AACACAATTCTTGGCAGAAA	neProvs	YMR302C	YME2	0	-0.277582	-0.471226	-0.803371
TTATTCTGCTGAAGATGCTA	neProvs	YBR221C	PDB1	0	-0.704638	-0.589571	-0.803289
GGGCCCACATGAAGTCCGAT	neProvs	YBR267W	REI1	0	-0.0964829	-0.392356	-0.802798
GTCGAACAATTGCATTATAC	neStops	YPL042C	SSN3	0	-0.157597	-0.326181	-0.801581
ATTTCTTCTCACAAGATTTA	eProvs	YCL017C	NFS1	0	-0.146295	-0.698711	-0.801452
TCTCCCACAACATATCACTC	neProvs	YDR107C	TMN2	0	-0.229389	-0.682991	-0.801273
TCTCACAAAATTGGCATTGA	neProvs	YMR070W	MOT3	0	-0.443548	-0.332045	-0.800866
ATGCACCACGTGCCTTACTT	eProvs	YMR211W	DML1	0	-0.238301	-0.0705658	-0.799414
CCTCCTGACGTAGAGCAACT	eProvs	YGR029W	ERV1	0	0.124936	-0.064553	-0.799398
ACGCCCTTCGACTTTAACGG	neProvs	YLR350W	ORM2	0	-0.13706	-0.438938	-0.79894
TCAACAAATCAAGGATTCCC	neStops	YOL145C	CTR9	0	-1.02262	-0.930146	-0.798558
TCGTCAATGTTTCAGAGAAA	neStops	YDL061C	RPS29B	0	-0.665001	-0.871339	-0.797372
GTACAAGGTGGTATCTCTAA	neStops	YGL148W	ARO2	0	-0.662744	-1.30131	-0.79717
GACCCTATTCAATCCGTTAA	eProvs	YFR004W	RPN11	0	-0.610017	-0.607806	-0.796832
CTTACGATCAGGGTTCGTAC	neStops	YGR196C	FYV8	0	-0.0918561	-0.477429	-0.796068
ATCATCCCATTTCATCTTCA	neStops	YGR061C	ADE6	0	-0.578694	-0.531617	-0.795626
GATTTCGTATATGATCGATG	eProvs	YNL262W	POL2	0	-0.286554	-0.390504	-0.794278
ATTCTCCACCGAAAAATACA	neProvs	YNR001C	CIT1	0	-0.795767	-0.795262	-0.793966
ATCGCAATATTCTGCCACAG	eProvs	YJL087C	TRL1	0	-0.236427	-0.612576	-0.793652
GAGCAACATTTAGCTCATTT	neStops	YPL154C	PEP4	0	0.030437	-0.189967	-0.79125
TGGGCACAGCAGTACATTAC	neProvs	YHR071C-A	YHR071C-A	0	-0.71587	-1.57253	-0.790954
GCTGTTCCCGGTGGTCTGAT	eProvs	YER025W	GCD11	0	-0.667049	-0.859458	-0.790666
TGGCCATGTTGACTTGAAGA	neStops	YDR126W	SWF1	0	0.0966555	-0.227145	-0.790014
TTTCAAGAACTAATGGGAAA	neStops	YDR386W	MUS81	0	-0.0811844	-0.6394	-0.78971
GGTCGTTCCGTCACCTTCGT	eProvs	YLL008W	DRS1	0	-0.282757	-0.97862	-0.789521
TGAACCCCTCCATATAATGG	eProvs	YGL091C	NBP35	0	-0.171667	-0.709439	-0.788362
CCCCTGCTCAAGAGCCTGCA	eProvs	YDL064W	UBC9	0	0.152376	-0.660983	-0.787777
TCATTCGCCCAAACCTTCTA	eProvs	YIR008C	PRI1	0	-0.517864	-0.70407	-0.78736
TCACCAGCAGCGAAAAATCC	eProvs	YDR353W	TRR1	0	0.169171	-0.262301	-0.785957
CCCCCCAATTTAAAGTCAAG	neStops	YDL135C	RDI1	0	-0.244145	-0.215747	-0.785368
TAGCGCCAGGAGGAAGTTTC	eProvs	YMR128W	ECM16	0	0.157317	-0.491712	-0.78518
GCTTCAAAAGCCAATGTCGG	neStops	YKL101W	HSL1	0	-0.743286	-0.662	-0.784283
AGTGGCCGTGCTGGAAGCCC	eProvs	YBR190W	YBR190W	0	-0.841325	-0.720156	-0.784048
TTCACGTCCTAACATATCAC	eProvs	YLR305C	STT4	0	-0.143822	-0.483902	-0.783898
CGCTGCCTGGGCTTCCAGCA	eProvs	YBR190W	YBR190W	0	-0.429185	-0.641122	-0.783749
GAGACTTCATTGACCATTAA	eProvs	YKR086W	PRP16	0	-0.0731691	-1.1272	-0.783303
AGGACCCGATTGGTTCCTCA	neStops	YKR054C	DYN1	0	0.0717935	-0.293978	-0.782482
CATCGTAATAAAGATGGTAC	eProvs	YKL182W	FAS1	0	-0.267641	-0.533343	-0.780882
GTTCAGCAGGCGTTAATAAA	neStops	YPR164W	MMS1	0	0.222047	-0.0465761	-0.780242
GATGGATCTCTTGTTTGTAG	eProvs	YPR178W	PRP4	0	-0.032088	-0.447072	-0.780142
ATTTCTTCGAGGTCGAAATA	neProvs	YNR036C	MRPS12	0	-0.285971	-0.550992	-0.779886
TCTAAACCTAAAGCTAATTG	eProvs	YMR203W	TOM40	0	-0.160292	-0.183209	-0.778127
CAACTACGATAACTCCTGGC	eProvs	YJL174W	KRE9	0	-0.286538	-1.12346	-0.777216
ATTCACAAATAACAAGCGGA	neStops	YGR104C	SRB5	0	-0.951556	-0.403623	-0.77703
TTTCCAAAGAAGGCAGAGTC	neStops	YJL141C	YAK1	0	-0.0135699	-0.342787	-0.776846
TATGTCCTCTGGTTTGGAAA	eProvs	YNL118C	DCP2	0	0.0125767	-0.343348	-0.776478
TCACCACAATTTCTACAAGT	neStops	YIL020C	HIS6	0	-0.326139	-0.332853	-0.776264
GAAGTACCCCATGTAATAGT	neProvs	YGL009C	LEU1	0	-0.92127	-1.13353	-0.775955
GCTCGTTTGAAGGGTAAAGA	eProvs	YDL140C	RPO21	0	-0.321466	-0.198144	-0.775288
TATCAGACACACAGGAAAAA	neStops	YKR099W	BAS1	0	-0.0212531	-0.537646	-0.772838
TTTACCGTACTATCCCCACG	eProvs	YDL017W	CDC7	0	-0.0785298	-0.295029	-0.771992
ACTACCTATGAAAACAACAA	eProvs	YOR294W	RRS1	0	-0.193652	-0.315591	-0.770645
ATACCACCGTTAATAGAACT	eProvs	YER094C	PUP3	0	-0.391133	-0.712697	-0.77064
CCAAATCAGAGAATTGATTT	neStops	YPL254W	HFI1	0	-0.066265	-0.629063	-0.770393
ATTCTTACAAATGGAGTCCA	eProvs	YDR228C	PCF11	0	-1.27182	-1.25707	-0.768666
ATTCAAAATACAAGAAAGGC	neStops	YAL059W	ECM1	0	-0.016837	-0.305732	-0.767879
GAAAAACAAGATGAGGTATC	neStops	YBR069C	TAT1	0	-0.116473	-0.374332	-0.767277
CGCTTTCCCTGGGGCACTGA	eProvs	YMR220W	ERG8	0	-0.0386668	-0.963577	-0.767025
GGTCAGGAGGCCATTGCTGT	neStops	YER178W	PDA1	0	-0.400742	-0.0812469	-0.7667
TTCGTACCCACATTGATCGC	eProvs	YBR202W	MCM7	0	-0.284909	-0.531262	-0.766412
ACAAACCTTCCATTTGTCCC	eProvs	YNL260C	LTO1	0	-0.13403	-0.318151	-0.7662
AGCTCATTGGATGTCGGCGA	eProvs	YOR272W	YTM1	0	-0.747082	-1.66252	-0.765686
TCTCCAATTAACCCAGGGTT	neStops	YFL036W	RPO41	0	-0.2261	0.0205075	-0.764281
GATTCAGAACAGATTGAATA	neStops	YPL249C	GYP5	0	-0.344209	-0.174025	-0.763552
AGAGAACAATGGGTAATTGT	eProvs	YHR122W	CIA2	0	-0.0203183	-0.390878	-0.762984
TGATCCTCAAAAACCTATAG	neStops	YLR357W	RSC2	0	-0.2149	-0.117885	-0.762695
GATCCCTGGCCAAGCACCGA	eProvs	YGR048W	UFD1	0	-0.0958485	-0.790221	-0.761779
CCAGCACCGACGTATAAGAC	eProvs	YMR108W	ILV2	0	0.0889769	-1.0169	-0.761768
CTTACCTGATTCCTTGAACC	eProvs	YGR074W	SMD1	0	-0.0501532	0.103221	-0.760719
ATTCCCCCAAGGTTATCTGA	neProvs	YPR002W	PDH1	0	-0.634161	-0.541146	-0.75978
GTTCCAAACCCGCTCATTGA	neStops	YKL087C	CYT2	0	-0.139924	-0.461696	-0.759685
AAGAACAAGTTGAGATATTC	eProvs	YDR324C	UTP4	0	-0.279413	-0.448264	-0.759098
ATTTCTCAAAATGATGAGAC	neStops	YJL102W	MEF2	0	-0.200336	-0.277682	-0.758972
GTCACCATCGATAGCAATAC	eProvs	YKL104C	GFA1	0	-0.252661	-0.913868	-0.758326
GCTTCCATTAATAGAATTTA	eProvs	YER133W	GLC7	0	-0.519982	-0.534301	-0.758279
ACTTTCCTGATCCAATCAAT	eProvs	YBR136W	MEC1	0	-0.368661	-0.657954	-0.757732
ACCCAATGGTCGAAAAGATT	neStops	YHR091C	MSR1	0	-0.225346	-0.563453	-0.757687
CATACCTGATATGATCATAT	eProvs	YOL094C	RFC4	0	0.0851439	-0.179755	-0.757555
TTTCTCTCCATTAGCAGAAC	eProvs	YIL143C	SSL2	0	0.0105031	-0.285844	-0.756903
CACCACAAGATGCCGAAGGT	neStops	YOL121C	RPS19A	0	-0.040197	-0.129931	-0.756875
TTCCTTACCTAATCTGTAGG	eProvs	YFL045C	SEC53	0	-0.8519	-0.53885	-0.756692
GTTTGCCTGAACATGCTTCA	eProvs	YDR044W	HEM13	0	-0.0994141	-0.123013	-0.756029
GTTTCACAGCAACCCCAAGC	neStops	YLR081W	GAL2	0	-0.416581	-0.830442	-0.755363
GCGCACCTAACCAAGTTTGC	eProvs	YHR186C	KOG1	0	-0.0185671	-0.0446367	-0.75458
CATACACATATTAAAGGTTT	eProvs	YDR190C	RVB1	0	-0.762613	-0.732035	-0.753329
CATCTCCAAACTCATGAATG	neProvs	YJR104C	SOD1	0	-0.39691	-0.394037	-0.752913
ATCCCATTTAATCCACGCCA	neStops	YIL112W	HOS4	0	-0.211783	-0.362068	-0.750735
CTATCTACAAGGATCGGAAA	eProvs	YPR086W	SUA7	0	-0.395285	-0.136865	-0.750506
GTAACCCAAGAAAATACCCA	neProvs	YDR345C	HXT3	0	-0.0769774	-0.210551	-0.750174
AACACATTCATTTAATCTAA	eProvs	YOR116C	RPO31	0	-0.193529	-0.544405	-0.750113
TTTCCGACCAACAAGACGTA	eProvs	YPL124W	SPC29	0	-0.0612409	-0.549578	-0.747373
GTGGTCCCCCGTGCAGACCG	eProvs	YDR054C	CDC34	0	-0.59476	-1.0077	-0.747294
GTTGGTTCCTGTTGGTGGTC	eProvs	YJR016C	ILV3	0	-0.332031	-0.856676	-0.747002
CTTACCTTCGTTGGCACTGG	eProvs	YMR146C	TIF34	0	-0.227248	-0.644828	-0.746635
ATTGCACCATGTTAGTAAGC	neStops	YDR320C	SWA2	0	-0.0966367	0.0656262	-0.742923
GCCGGCCAGGTGGTGTACTT	neStops	YJR105W	ADO1	0	-0.152548	-0.287836	-0.742841
ACTAAACCAAGGACTTGACC	eProvs	YDR091C	RLI1	0	-0.69994	-1.56146	-0.742774
GTTATTCAAAGTCCCTCCGA	neStops	YDL117W	CYK3	0	-0.495483	-0.349561	-0.742285
CCACATTGAGGAATACCGTT	eProvs	YGR094W	VAS1	0	-0.246697	-0.602836	-0.742159
GGAATCCCTGTGTAGACCTT	eProvs	YDR087C	RRP1	0	-0.168621	-0.436233	-0.741473
CTTTCAGCCGGTAGAGGTTA	neStops	YJL047C	RTT101	0	0.0533781	-0.374963	-0.740202
GAAACTAAAGCTTTGGAGGA	eProvs	YGR264C	MES1	0	0.0460773	-0.666383	-0.737615
TAATGTCCAAGCACATCTAG	neStops	YOR251C	TUM1	0	0.0137076	-0.256084	-0.73713
TCACCTCAAATCATCGGCTT	neStops	YHR129C	ARP1	0	0.0550627	-0.36407	-0.736928
CCAAACCATTTGAAGACACG	neStops	YGL234W	ADE5,7	0	-0.322634	-0.246509	-0.73616
CTGACCTGATGGGTCATAAG	eProvs	YDR398W	UTP5	0	-0.353109	-0.839161	-0.735512
CCACCTACCGGTGAACTAAG	eProvs	YNR016C	ACC1	0	0.0447802	-0.678338	-0.735444
CTATCCATTCACAAATCTCA	neProvs	YML061C	PIF1	0	-0.179633	-0.445521	-0.735396
ACACCATATATGCCAGAAAT	eProvs	YGR264C	MES1	0	-0.303234	-0.355023	-0.732902
CGTGGTCCAGTTGGCTTGGA	neProvs	YOR323C	PRO2	0	-0.414271	-0.698377	-0.732482
ACTCTCCCGTCGCATTGACA	neProvs	YBR106W	PHO88	0	-0.648353	-0.508941	-0.731561
TTTCACAAAGCAATTACGAG	eProvs	YLR409C	UTP21	0	-0.121816	-0.218692	-0.731556
TCTTCTCGTGTGGCTTGTTT	neProvs	YPL226W	NEW1	0	0.181298	-0.221183	-0.730934
GCTGTATCACGACATTAAGC	eProvs	YLR033W	RSC58	0	0.157283	-0.283303	-0.730923
TTGAACAAGCGGAAACATAT	neStops	YPL225W	YPL225W	0	-0.0131436	-0.145798	-0.730922
AGCGGAACCCAATCTATCTT	eProvs	YDL143W	CCT4	0	-2.29821	-1.56515	-0.73048
ATCCCAAGCTCCAAGTGAGT	neStops	YNL096C	RPS7B	0	-0.155168	-0.504175	-0.730028
AGATCACGTCAGCGCAGTAA	eProvs	YLL011W	SOF1	0	-0.0216128	-0.391582	-0.729918
ACAACAGATGTGGCTGCTAG	eProvs	YFL002C	SPB4	0	-0.207873	-0.379399	-0.729452
CCTTCACAAGGCCCAATCAA	neStops	YIR033W	MGA2	0	-0.0473731	-0.454839	-0.728805
TCTAGGTCAGTCTTCATTCA	neStops	YHR056C	RSC30	0	-0.160664	-0.287894	-0.728777
TTTCAGTTCGGTAATATCCC	neStops	YKL161C	KDX1	0	-0.316486	-0.37424	-0.72869
AGACCTACAAAGTTTATACC	neStops	YGR092W	DBF2	0	-0.172973	-0.854293	-0.72829
CCTCTCGACTCGTCACGTCA	neStops	YER154W	OXA1	0	-0.406908	-0.627545	-0.726785
CACCAGACAATGTACCCTCT	eProvs	YFR031C	SMC2	0	-0.519362	-1.00267	-0.726746
TTCACACACAATGTCCAAGC	eProvs	YNL310C	ZIM17	0	-0.214057	-0.396912	-0.726624
ATACCATGTTACATTTAAAG	neStops	YGR143W	SKN1	0	-0.256558	-0.44324	-0.7264
ATGATCCATATAACACGTCC	eProvs	YML023C	NSE5	0	-0.145037	-0.493422	-0.725929
ATTACACCAATATCTTCGCA	eProvs	YHR164C	DNA2	0	-0.186301	-0.676752	-0.725662
ATTTCTCTTATTCCACTACC	eProvs	YOR176W	HEM15	0	-0.134	-0.336097	-0.724487
GGGCTCCAAAATTGTTTCCA	eProvs	YJR064W	CCT5	0	0.115389	-0.173699	-0.72382
TGTCACCTTCTGTTAATTCT	neProvs	YIR005W	IST3	0	0.061068	0.154798	-0.723647
GTTTCTACCGTTCATCATCA	eProvs	YJR123W	RPS5	0	-0.601651	-0.50728	-0.723538
ACCCAGAGGAACATCATCAG	neStops	YDR090C	YDR090C	0	-0.473503	-0.548525	-0.723436
ACGTTCTCCAGTGGTTGAGG	neStops	YJL212C	OPT1	0	-0.38966	-0.504945	-0.723344
GATCAAGGGGATCCTTCGAA	neStops	YLR399C	BDF1	0	-0.386743	-0.747989	-0.722444
GTCACTGTTCAACCTGACTC	eProvs	YMR049C	ERB1	0	-0.103719	-0.264527	-0.722342
GCTTCATTTCCTAAGCTGAC	neProvs	YMR306W	FKS3	0	-0.250462	-0.560769	-0.721184
CATTTCACCAAGTGATTCAT	eProvs	YNL313C	EMW1	0	-0.162895	-0.523675	-0.720601
TCCAAAACAAGACTTCGCTG	neStops	YPL154C	PEP4	0	-0.43145	-0.474346	-0.72029
GAACATTCAATATGCCATCC	eProvs	YNL247W	YNL247W	0	-0.330124	-0.84609	-0.719263
TTACCACAAAAAAAATGATG	neProvs	YOL014W	YOL014W	0	-0.0688766	-0.311479	-0.719194
TTACCATAGGTGGCAATGAT	eProvs	YPL243W	SRP68	0	-1.05373	-1.83327	-0.71868
AGTACCGGAGCGACTACCTC	eProvs	YBR237W	PRP5	0	0.145647	0.00117229	-0.717854
CTCCTTCCAATACTATATCG	neStops	YGL045W	RIM8	0	-0.32751	-0.646537	-0.717813
CGATCATCAGTTAAGACTTC	neStops	YER095W	RAD51	0	-0.432378	-0.726822	-0.717563
AATCTCACACCGCTACTTCA	eProvs	YKL014C	URB1	0	-0.405749	-0.564203	-0.717025
AAAGATCCCAAGGCCTACCC	eProvs	YNL102W	POL1	0	-0.304001	-0.315939	-0.716997
AATATTCTCACGACAGTGAT	eProvs	YNL317W	PFS2	0	-0.31141	-0.237815	-0.716265
TTATACAACGAACAAAATGT	eProvs	YHR023W	MYO1	0	-0.223586	-0.0603932	-0.714556
GAGGATTCCATTTATCATGG	eProvs	YDR054C	CDC34	0	-0.30946	-0.470964	-0.7141
CTTAAACCAGGAGCTGATGT	neProvs	YER070W	RNR1	0	-0.189638	-0.842891	-0.713627
TAACTTTCAAACACATTACA	neStops	YLR387C	REH1	0	-0.142426	-0.0424736	-0.713311
TTCAATCAGAGATCCAAATT	neStops	YOR069W	VPS5	0	-0.643815	-0.467341	-0.712379
AACCCTTCTCTCTTTGCTGT	eProvs	YLL034C	RIX7	0	-0.221737	-0.562145	-0.712283
AGGATACCTAAAGTGTGCTT	eProvs	YER168C	CCA1	0	-0.16219	-0.337873	-0.71213
CACTATCCAGCAAATTCGTT	neStops	YDR195W	REF2	0	-0.213457	-0.307167	-0.711641
TGCACAGTCTTCTTCCATAC	neStops	YFR019W	FAB1	0	0.174149	0.0345417	-0.711302
GTATTTCTTACTGTTCCGGT	eProvs	YGL225W	VRG4	0	-0.317293	-1.2189	-0.709934
TCCCCACAATAAATTTCGCA	neProvs	YMR194C-A	YMR194C-A	0	-0.593212	-0.485433	-0.709726
TGGACCGGTGGTAGAGGTGG	eProvs	YKL182W	FAS1	0	-0.548348	-1.2691	-0.709287
CCTTATACAAACCGGAGGTG	eProvs	YOR116C	RPO31	0	-0.367917	-0.473262	-0.709211
ATTCTCAGGGCACTACACAG	neStops	YLL012W	YEH1	0	-0.155222	-0.706332	-0.707809
ACACCCTCAAATTGTTCCTA	neStops	YPL260W	CUB1	0	-0.502416	-0.653724	-0.707654
GAATCCCTTCTGGTAAGGTA	eProvs	YJL050W	MTR4	0	-0.639303	-0.718476	-0.707522
CTTATACAAACCGGAGGTGC	eProvs	YOR116C	RPO31	0	-0.993056	-1.19277	-0.707399
TGTGGCGATGCTGCATCCGT	neStops	YDR315C	IPK1	0	0.0306425	-0.166773	-0.707131
AGCCGTTCAAGCATTAGGTC	neStops	YGR061C	ADE6	0	-0.529481	-0.418655	-0.707045
AAGCCCAATTTACAACAACG	neStops	YDR488C	PAC11	0	-0.0100916	-0.942244	-0.706334
GCCCTCCTGATCTACTTGAT	neProvs	YDR334W	SWR1	0	-0.0577174	-0.187156	-0.706092
ATCCCGTCATTATGTACAGC	eProvs	YDL017W	CDC7	0	-0.123889	-0.165787	-0.704133
CCACCCAGATCGATATATGG	neStops	YNL307C	MCK1	0	0.0141397	-0.341235	-0.703893
AGTTTGACAACTACCTAATA	eProvs	YKL144C	RPC25	0	-0.316125	-0.693915	-0.703888
CCGTCGTGATTCCTGTTCCT	eProvs	YDL102W	POL3	0	-0.122881	-0.357002	-0.703531
GTTCATCCAGACTACTTATA	eProvs	YPL231W	FAS2	0	-0.469685	-0.767539	-0.70328
TCTTGTCTTTGGGTTGGAGA	eProvs	YPL217C	BMS1	0	-0.0758703	-0.362527	-0.702053
CATTGACCATTCCTTGGCGC	neStops	YNL297C	MON2	0	0.168042	-0.510812	-0.70205
CACCGGCAACACCACCTTTC	eProvs	YER025W	GCD11	0	-0.512837	-1.12184	-0.701325
GTAACCGGAACCAATGGCAA	eProvs	YLR355C	ILV5	0	-0.920366	-0.961002	-0.701041
GCACACATTGATGGATAAGC	eProvs	YKR002W	PAP1	0	-0.226769	-0.52398	-0.70085
ATGGGGACAACCAGTTTCCA	eProvs	YIL068C	SEC6	0	-0.985474	-1.14217	-0.700144
TACCAAATGCTTCCATGATA	eProvs	YOR326W	MYO2	0	-0.525959	-0.740623	-0.700129
ATATCTACAAAGCCTTTGCA	eProvs	YAL041W	CDC24	0	-0.252141	-0.478078	-0.699549
GATATGCCAATCTTAAAATC	eProvs	YFR027W	ECO1	0	-0.25806	-0.778814	-0.698929
ATACAAAATGGCCTCCAGGT	neStops	YKR054C	DYN1	0	-0.151646	-0.323255	-0.698398
GTTCCCCAAGCAGGAGATCT	neProvs	YOR266W	PNT1	0	-0.315276	-0.419727	-0.696837
TTCACCTGAAAAGGGGTCCT	eProvs	YER172C	BRR2	0	-0.183878	-0.286617	-0.69516
TTAGAACCGTAACCGATCTT	eProvs	YBL092W	RPL32	0	-0.579717	-0.860382	-0.694621
GGCGCCTCATAAGCCTTACG	eProvs	YOR176W	HEM15	0	0.161644	0.254141	-0.694154
CCTGGGCCAAAAATACCAGC	eProvs	YGL001C	ERG26	0	-0.355085	-0.838412	-0.694097
GCATTACAGAACCAACCTAC	neStops	YBL007C	SLA1	0	-0.348454	-0.0258908	-0.693833
ATCCCGTACTCAAGACGAAG	eProvs	YJL014W	CCT3	0	-0.0146366	-0.61282	-0.693525
CCTCCATTCAGTGATCAATT	neProvs	YDL101C	DUN1	0	-0.176335	-0.344561	-0.693308
GCCGCCGAAAATACATCAGA	neProvs	YBR224W	YBR224W	0	-0.623182	-0.763977	-0.693264
GGTCCCAGAATCGCAATAGC	neStops	YHL006C	SHU1	0	-0.471141	-0.230491	-0.693259
ATAGCTCCTACCAGTATCTA	eProvs	YML091C	RPM2	0	-0.382577	-0.396996	-0.693215
GGACACATGGAGGATTTGAC	neProvs	YEL045C	YEL045C	0	-0.313976	-0.192751	-0.6929
CACACAGCGCCAAAGACAAA	neStops	YBR173C	UMP1	0	-0.066947	-0.4608	-0.692727
AGCACCAAGAACATCCCTAC	eProvs	YMR290C	HAS1	0	-0.398709	-0.750101	-0.692628
TTTCATTCTAGTCTCGAGAA	neProvs	YDR250C	YDR250C	0	-0.109915	-0.210934	-0.69241
GCATCAGATTCCATTAACTC	neStops	YLR398C	SKI2	0	-0.10536	-0.333156	-0.692178
ACTTTCCCCGCCCGTATATT	eProvs	YHR024C	MAS2	0	-0.318468	-0.685009	-0.692051
ACTCCGTTGGATATCTCTAG	neProvs	YNL072W	RNH201	0	-0.122765	-0.323331	-0.691237
ACTCCATTTGGACTCTACCA	neStops	YPR068C	HOS1	0	-0.108895	-0.497257	-0.690213
GGTTCTCTATTCAAGGGTTG	eProvs	YBL030C	PET9	0	-0.515349	-0.571053	-0.689778
TTTCATTCCCGTCCCTGAAC	neProvs	YFL016C	MDJ1	0	-0.12513	-0.0846738	-0.688621
TCCAACAAGGTGTATTGTCA	neStops	YFL016C	MDJ1	0	0.0173546	0.171701	-0.686633
GGGTACCGTCCGATAGGATT	eProvs	YDR060W	MAK21	0	-0.147065	-0.0972684	-0.6865
GGCATACCAGGAACATCCCA	eProvs	YHR165C	PRP8	0	-0.209542	-0.213356	-0.686451
TCATCTTCCAAAATATGAAA	neStops	YLR312W-A	MRPL15	0	-0.10551	-0.215653	-0.686252
AGATACCATCCAAAAACTTA	neProvs	YNL067W	RPL9B	0	0.0762742	-0.461906	-0.686205
ATGACCCTCTTGGAAACAAC	eProvs	YFR037C	RSC8	0	-0.0986383	-0.50724	-0.686158
GCTATTCAAAAAGCTCCAGA	neStops	YLR027C	AAT2	0	-0.173701	0.111241	-0.686121
GATCAAGGTGTTCGGGTCCT	neStops	YKL212W	SAC1	0	-0.0946515	-0.380875	-0.685481
GCTAACCCTTCTAGACGTAT	eProvs	YER148W	SPT15	0	-0.0519331	-0.125332	-0.685307
AATACCAAAGACGAATCTTT	neProvs	YLR237W	THI7	0	-0.271366	-0.363316	-0.685078
ATGCTCCGATAATTGCGACA	eProvs	YHR186C	KOG1	0	0.117353	-0.164912	-0.68479
TTTACAAATGATTACAAACT	neStops	YLR381W	CTF3	0	-0.301149	-0.272798	-0.684334
TCCCAGGCCTGATTAATGCT	eProvs	YDL007W	RPT2	0	-0.756385	-0.697025	-0.684214
AGTCCATAAGTACAATATGA	neStops	YGL012W	ERG4	0	-0.202858	-0.14683	-0.683271
ATATACCAAAGGGGTAAAGA	neStops	YGL100W	SEH1	0	0.0481668	-0.0363035	-0.682512
GTCACCCCCAAGATTAGAGA	neProvs	YLR420W	URA4	0	-0.225648	-0.114277	-0.682357
TCACCTTTAAAAAACGGTCC	eProvs	YDL103C	QRI1	0	0.152494	-0.0961371	-0.682052
GTCCCACAAGGCGGTAACAC	neStops	YDL178W	DLD2	0	-0.454638	-0.808224	-0.681969
GAAGGCCAAGGGATGGTGTT	neStops	YFL023W	BUD27	0	-0.069219	0.186924	-0.68168
ACTGCCTCACACAACCCAGG	neProvs	YKL127W	PGM1	0	-0.648429	-0.66921	-0.681506
ACCCCACAACCCAACCAAAG	neStops	YMR253C	YMR253C	0	-0.453456	-0.383218	-0.681242
TTACAGAGAAGGAACTTGAA	neStops	YDL159W	STE7	0	-0.0267121	-0.682413	-0.680575
TTTACCTTGTTCGTTACCCA	eProvs	YJL069C	UTP18	0	-0.520043	-0.619425	-0.680026
AAGACACAATGGGAGGTTTC	neStops	YAL023C	PMT2	0	-0.525905	-0.694309	-0.679694
GAAACCCTTAAGCACGGCGG	eProvs	YPR183W	DPM1	0	-0.10327	-0.478557	-0.679452
TCCCTTACATGACTATTATG	neProvs	YPL057C	SUR1	0	-0.13459	-0.143417	-0.679225
GATCCATGACGGATGGGGCC	neStops	YER154W	OXA1	0	-0.81229	-0.438987	-0.679155
TTCTTTCCAACAAGTTTCAA	neStops	YDR074W	TPS2	0	-0.150671	-0.532998	-0.678489
ACCCTTACCGGCCTTGACGT	neProvs	YDL083C	RPS16B	0	-0.39649	-0.649385	-0.678316
TTCCCAATCATGAGATGAAC	neStops	YNL297C	MON2	0	0.00746338	-0.472515	-0.677463
ATGATCGAGTACTGATCTTG	neStops	YPL097W	MSY1	0	0.00361188	-0.222092	-0.677221
AAATTTCCAATTGTTATGGG	eProvs	YPL217C	BMS1	0	0.0763372	-0.510729	-0.676444
GCGCCAATTTGCGAATTCTC	eProvs	YNL172W	APC1	0	-0.226235	-0.126524	-0.675952
ACGACAAAATGCGATCAAAA	neStops	YDR482C	CWC21	0	-0.0997457	-0.0437933	-0.674352
GACAAACAAGAAGCTCTGAT	neStops	YNL271C	BNI1	0	-0.239874	-0.212558	-0.674243
ATTCCCTGCAAGCCCCCCAA	neProvs	YLR348C	DIC1	0	-0.33387	-0.323326	-0.673779
GACCACCGTCAGCGACGCCC	eProvs	YJL005W	CYR1	0	-0.451003	-0.301001	-0.673259
CCATAATCCAGAAGGATCAA	eProvs	YMR049C	ERB1	0	-0.271753	-0.624301	-0.672504
AGACCCGCTCAAAGAGAATA	eProvs	YOR168W	GLN4	0	-0.567285	-0.922453	-0.671629
ATTCATGCAGCAGGTTTCAT	neProvs	YER156C	YER156C	0	-0.00070688	-0.0663761	-0.671094
AAAAGCACCGAAAATGACGG	eProvs	YKL004W	AUR1	0	-0.490338	-0.660383	-0.670976
AGACCTGACAATTATATCTT	eProvs	YFL037W	TUB2	0	-0.106138	-0.38404	-0.670777
GAAATTCCAGAAGGATGATC	neStops	YML107C	PML39	0	-0.357067	-0.161161	-0.670609
AGGGTTACCAAGAGAGTCAC	eProvs	YKL165C	MCD4	0	-0.968694	-1.35107	-0.670552
CTTACAAGAAATCTGGTGTG	neStops	YER019W	ISC1	0	-0.197609	-0.342086	-0.670139
TTGCTATCAACTTCCTGCAG	neStops	YMR190C	SGS1	0	-0.111939	-0.0522574	-0.6696
GTTCTGAAGATAAAACCGTC	eProvs	YBR198C	TAF5	0	-0.140374	-0.727258	-0.66913
TCTACAAGGCTTTGGATACT	neStops	YER014W	HEM14	0	0.720829	0.606844	-0.669109
ATTCAACCCATTTATAACGA	neStops	YCL008C	STP22	0	0.127142	-0.130521	-0.669086
ATTTCCTGAAAAGTATGTTC	eProvs	YLR196W	PWP1	0	-0.363037	-0.402642	-0.668593
GTCCAAAATGGTGTACCTCA	neStops	YER107C	GLE2	0	0.096425	-0.415143	-0.667795
CCAGGCACCAAAGTGAGCAA	neStops	YNL080C	EOS1	0	0.170546	-0.504088	-0.667442
TCTATCCAGACTTACGTTTC	neStops	YER044C	ERG28	0	-0.139561	-0.504818	-0.66682
TGCAGTCCAAGAAATGGCAG	neStops	YKR052C	MRS4	0	-0.333212	-0.128772	-0.666804
ACACACCTATTACCGAATAC	neProvs	YBR221C	PDB1	0	-0.57146	-0.999049	-0.666643
ACACCTTCCAATCTTTGCAA	neStops	YLR288C	MEC3	0	0.109296	-0.166768	-0.666527
TAGACCTTTCCTTCTTCTGA	eProvs	YNL163C	RIA1	0	0.0456448	-0.412744	-0.66502
GCCCAGTTTGGCGTGTTGAT	eProvs	YLR208W	SEC13	0	-0.149978	-0.51365	-0.664854
TCTGACACCATAACCAGTCT	eProvs	YPR165W	RHO1	0	-0.92967	-1.22423	-0.664506
ACCCTCCTGTCGAGAGAGAT	eProvs	YGR267C	FOL2	0	-0.392062	-0.647183	-0.664383
TCTCAAGGCCAATCATCTAC	neStops	YGR178C	PBP1	0	-0.154966	-0.584458	-0.664265
GCTTCAAGAAAAAGAAGCCT	eProvs	YBR136W	MEC1	0	-0.454442	-0.86762	-0.663149
TTTCCCAGCCAGTCTGGTAA	neProvs	YEL036C	ANP1	0	-0.328642	-0.202316	-0.662877
GTTACAAAATATTACACCAA	neStops	YOL103W	ITR2	0	-0.525262	-0.264173	-0.662813
ACGATCCATTGGAACTTGGT	eProvs	YDL111C	RRP42	0	-0.42281	-0.506921	-0.662185
ACCACCCATGGGCGCACAAT	neProvs	YLL028W	TPO1	0	0.248407	-0.323083	-0.662168
GGTTCATCCTACATGGAACA	eProvs	YGR195W	SKI6	0	-0.115764	-0.464422	-0.660728
GATCCCAAGGCCTACCCAGG	eProvs	YNL102W	POL1	0	-0.484478	-0.859694	-0.659421
TCACCCTTCCAGGCAAAAAC	eProvs	YER043C	SAH1	0	-0.150241	-0.701878	-0.658964
TCTCAGGCAATAGACACACC	neStops	YOL004W	SIN3	0	-0.45003	-0.545537	-0.658552
AAACTTCGTTGGGTCCCCGT	eProvs	YJR064W	CCT5	0	0.0375571	-0.201843	-0.658136
CTCTTTCCAGGACTGTTTGG	neProvs	YIL088C	AVT7	0	0.0564373	-0.22309	-0.657469
ATTTCAAATTGGATTTAAAA	neStops	YLR247C	IRC20	0	-0.17014	-0.578678	-0.657424
TTTCTCAGATTGGTGTAAAA	neStops	YGL139W	FLC3	0	0.0627277	-0.337784	-0.657054
TTCTTCCCCACATTATCAAT	neProvs	YOR348C	PUT4	0	-0.565964	-0.337863	-0.656677
CCAAACATTGACTTTAAGAG	eProvs	YGL137W	SEC27	0	0.0565433	-0.482864	-0.656442
GGTCACACCTATGCTCTATA	eProvs	YLR153C	ACS2	0	-0.266123	-0.606652	-0.65602
GTCCTTCGCTAACAGCCAGT	eProvs	YNL163C	RIA1	0	-0.114836	-0.363531	-0.655905
GCGCTACCAACGCCATATCG	neStops	YML018C	YML018C	0	-0.139739	-0.159779	-0.655575
GCACCAAAAGATTATAGAAG	neStops	YMR207C	HFA1	0	-0.597065	-0.595558	-0.655235
GTTACACAATCCGCAGAAAA	neStops	YGR057C	LST7	0	0.300606	-0.384781	-0.655009
CACCACAACCCAAACCAAAG	neStops	YFL044C	OTU1	0	-0.217793	-0.377331	-0.654689
GCACAGTTATTGAATCAAGC	neStops	YMR279C	YMR279C	0	-0.765009	-0.22489	-0.653903
TCCCTGGTGAAACTAAGGTC	eProvs	YNR053C	NOG2	0	-0.57371	-1.20818	-0.653611
GGCCCACAGTCTTTCAGCTA	neStops	YOR033C	EXO1	0	-0.162589	-0.0354243	-0.653602
TCCACACAATCCTACATATA	neStops	YHL004W	MRP4	0	-0.273452	-0.362181	-0.653345
ACGACATCTGGAACCAATAT	eProvs	YOR260W	GCD1	0	-0.129477	-0.44263	-0.652419
AATCCACAAGGAGGAAAGAC	neStops	YDR097C	MSH6	0	-0.402208	-0.647078	-0.652367
ATCTCATCTGTTCTAGCAGG	eProvs	YGL040C	HEM2	0	0.147247	0.0132724	-0.65225
ACCGTTCCAGTAACCTTCAG	neStops	YER091C	MET6	0	-0.109557	-0.272071	-0.652003
GCTTCGCAAAAGGCTGTGAA	neStops	YNL080C	EOS1	0	-0.173009	-0.47566	-0.651579
CAAACACCTCATACTAAATG	eProvs	YKL095W	YJU2	0	-0.304449	-0.864789	-0.649882
AAGCCCACTCAATAATGGAT	eProvs	YGR185C	TYS1	0	-0.0439867	-0.450584	-0.649303
ATAGCCCGTAGGTCAAATTT	eProvs	YDR160W	SSY1	0	0.0570457	-0.113092	-0.64902
TGAACCACCTCTTAGTTCAC	eProvs	YNR016C	ACC1	0	-0.285151	-0.786692	-0.648693
AGATCAACAGTATGACTCAA	neStops	YMR016C	SOK2	0	-0.418347	-0.244609	-0.648653
ATATCTTATCGTTTCACAAT	eProvs	YBR123C	TFC1	0	0.101789	0.0304838	-0.648343
GACCCTACGGGCGAATTGTT	eProvs	YMR277W	FCP1	0	-0.270466	-0.150482	-0.648307
AGTCTTACCCGAACCTGTAG	eProvs	YDR243C	PRP28	0	-0.0409319	-0.169539	-0.647448
AGCACCACACAACACAGTGT	neProvs	YCR011C	ADP1	0	-0.225912	-0.182904	-0.64734
CCGCTCAAGGGCTCCAAAAC	neProvs	YMR179W	SPT21	0	0.269829	-0.27717	-0.647136
ATTGACTCCAAAGGTGAATC	neStops	YLR207W	HRD3	0	0.1681	-0.251746	-0.64569
ATTACTCCAAATGAATTCTT	neStops	YBR246W	RRT2	0	-0.261203	-0.327156	-0.64552
ATTATCCCACAAAGCCAACT	eProvs	YER136W	GDI1	0	-0.112758	-0.369132	-0.645353
TACGAGCCTTGTGAAAAGCA	neProvs	YDR448W	ADA2	0	-0.759917	-0.890629	-0.643312
ATTTCCAATGCCTCTTCAGG	eProvs	YNL189W	SRP1	0	-0.516258	-0.665646	-0.642676
GATTATCCATTCACTCAATT	eProvs	YNL221C	POP1	0	-0.00242539	-0.142772	-0.642593
TTCCCAATTATTGTTATTTA	neStops	YBL051C	PIN4	0	0.234069	0.0981629	-0.642458
TTACCAGTTAAGGGGTGTCG	neStops	YBR019C	GAL10	0	-0.91992	-0.351943	-0.640553
ATTGTTCCTGTTATTATGGC	neProvs	YEL027W	VMA3	0	-0.159893	-0.630717	-0.640099
GGTCAGAAGAAAGGAAATCT	eProvs	YNL161W	CBK1	0	-0.19227	-0.623052	-0.639755
ACCAGCAGAAAACTTCATAA	neProvs	YCL041C	YCL041C	0	-0.441848	-0.220451	-0.639734
TGGGACCTGCTTGCTGGATG	eProvs	YHR074W	QNS1	0	-0.293619	-0.0113391	-0.639714
ATCCAATTGACGCTATTAAA	neStops	YKL149C	DBR1	0	-0.151727	-0.152747	-0.639604
TTCACCGAATCTTTCATCGT	eProvs	YER125W	RSP5	0	-0.117097	-0.14518	-0.639122
GAAAACACCCTAAGAAAGCA	eProvs	YOR232W	MGE1	0	-0.341287	-0.400588	-0.638731
GACCACTTGCAGGACGAATT	neStops	YCR032W	BPH1	0	-0.233063	-0.555029	-0.638248
TTTCTTCCAGAAAAATGAAG	eProvs	YKL172W	EBP2	0	-0.184739	-0.960586	-0.637821
ACCAACACCAATCAGACCAC	eProvs	YER025W	GCD11	0	-0.840156	-1.20968	-0.637334
GTCCACATCAAACCGCGGGC	neStops	YLR046C	YLR046C	0	0.265054	-0.147732	-0.637007
TCCACACAAAATATCGTGAG	neStops	YGL028C	SCW11	0	-0.623401	-0.202894	-0.636908
CGTTCCACTAGATACCCCCA	eProvs	YHR166C	CDC23	0	-0.776236	-1.14795	-0.636293
TACCAATGGTCATACGCGAA	eProvs	YPR010C	RPA135	0	-0.242901	-0.709013	-0.635765
CGGTCAGATTGTGAAGGACC	neStops	YNL073W	MSK1	0	-0.093434	-0.0418038	-0.63476
TCAGCACAATAGACTCTGTA	neProvs	YPL208W	RKM1	0	-0.097498	-0.483193	-0.634469
TCTGCACCTTCAGTCGTAAG	eProvs	YLL034C	RIX7	0	-0.162909	-0.577757	-0.634301
AATCCCAAATTAAGCTGCCA	neStops	YDR392W	SPT3	0	-0.090471	-0.0293125	-0.634254
TTTCACCAGTACAACTTATG	neProvs	YGR001C	EFM5	0	-0.559753	-0.713886	-0.634252
TTGACACAACTTACGTATGC	neStops	YLR396C	VPS33	0	0.0933273	-0.0748703	-0.634139
GTTCCATGCGATCCCAAACC	neStops	YGR208W	SER2	0	-0.507666	-0.684047	-0.633243
GCAGCAAAATATAGGTACAT	neStops	YJR039W	YJR039W	0	-0.227244	-0.153041	-0.632612
TTTCCAGAAGGAAAATACCG	neStops	YDR541C	YDR541C	0	-0.253861	-0.385512	-0.632561
ATCCCTCAGGCAGTACTTTC	neStops	YNL275W	BOR1	0	-0.388252	-0.547471	-0.632057
TGGATATCCAAGAACATAAT	neStops	YOR359W	VTS1	0	-0.150823	-0.280603	-0.631904
CTTACAAATTGGACATTTGA	eProvs	YDR228C	PCF11	0	-0.332845	-0.519335	-0.631725
AGTCTTACCTGAGCCTGTTT	neProvs	YKR024C	DBP7	0	-0.372084	-0.533546	-0.631687
ACGTCAACAAAAAATTATCA	neStops	YPL054W	LEE1	0	-0.15018	-0.192137	-0.630941
CTCTGTACAGCCGTAAGCCA	eProvs	YJL005W	CYR1	0	-0.330507	-0.380629	-0.630898
TATGTCTTCCATGGATGTGT	neProvs	YBL017C	PEP1	0	-0.183419	-0.686786	-0.630805
AGAGTTTCCAGACAAATTAC	eProvs	YOL097C	WRS1	0	-0.0559636	-1.09568	-0.629522
GGAACAATGGGAATATCTAA	eProvs	YPL012W	RRP12	0	-0.235496	-0.822504	-0.629416
GCTATATCAAGGTAATAATA	neStops	YOR165W	SEY1	0	-0.151438	-0.306104	-0.629339
GTTTCCGCAGAAACATATTA	neStops	YDR463W	STP1	0	0.00773253	0.104862	-0.629301
GAACCATTCACCAATGGATG	neStops	YBL099W	ATP1	0	-0.25942	-0.205218	-0.629184
TTAGTGCAAAGTTCATTAGA	neStops	YPR141C	KAR3	0	0.238045	0.15103	-0.629152
CCCAAGCCAATTACGAGCCC	neStops	YEL036C	ANP1	0	-0.427314	-0.394843	-0.62889
TCACCAAATCCCGCTACCAA	eProvs	YCL017C	NFS1	0	0.0413451	-0.131916	-0.628221
ATTCATTCCAATCTGTATAG	neProvs	YGR125W	YGR125W	0	-0.0834549	-0.577198	-0.628177
TTTATGTCGAATAATCTCTT	neStops	YHR099W	TRA1	0	-0.0551839	-0.44195	-0.627995
TGCACAGGAAAAATTCTATA	neStops	YFR038W	IRC5	0	-0.36553	-0.130848	-0.627674
GTCGTGCCATTCTACATGGT	eProvs	YBR265W	TSC10	0	-0.278483	-0.310929	-0.626756
CTTTGCTCCTGGGTAATATC	neProvs	YGR289C	MAL11	0	-0.536246	-0.761785	-0.626742
TGCGCGGATCATGTCTTACG	eProvs	YDL221W	YDL221W	0	-0.0234837	-0.176294	-0.626282
CCTATCTCCGCTTACCACAG	eProvs	YDR023W	SES1	0	-0.398663	-0.709744	-0.626194
CATTTCCATGGATTTCTGTA	eProvs	YIL109C	SEC24	0	-0.421187	-0.518555	-0.625813
CCTTGTCCATGAGATATGGA	neStops	YER017C	AFG3	0	-0.294212	-0.4079	-0.625227
GTGCACCAATGGCTCAATAC	neStops	YJL062W	LAS21	0	-0.475977	-0.20142	-0.625152
GAAACAGCGTTTACTGGGGA	neStops	YHR191C	CTF8	0	-0.0243164	-0.109052	-0.624647
GCACCATGTAGTATATTCAG	neStops	YKR102W	FLO10	0	-0.84317	-1.02091	-0.624396
TATTCAAGCATGTGGTGAAA	neStops	YCL025C	AGP1	0	-0.491175	-0.113727	-0.624343
TAACAATCATCGGATCCAGG	neProvs	YJL056C	ZAP1	0	-0.311679	-0.377091	-0.623789
GCTACATCAAATTCGTAAGA	neStops	YPL212C	PUS1	0	-0.0641827	-0.37614	-0.62378
ACCACCCCATGTAGCAGAAA	neStops	YDL194W	SNF3	0	-0.284538	-0.496135	-0.623611
ACTCCACTGAAAAATACAGC	neProvs	YNL003C	PET8	0	-0.00295794	-0.41508	-0.623578
TAAACATCAACGTTCGATGT	neStops	YHR147C	MRPL6	0	-0.147015	-0.155217	-0.622708
GAACCAATCATATTTGTTAC	neStops	YBL007C	SLA1	0	-0.083504	-0.287242	-0.622343
AATCACTTTGACCTCCACCA	eProvs	YHL015W	RPS20	0	-0.549785	-0.201057	-0.621491
TCAACAAATCGAAGATGATG	neStops	YGL082W	YGL082W	0	-0.604513	-0.490628	-0.621442
TTCCCAGAAGGAGACATCCG	neProvs	YNL144C	YNL144C	0	-0.443431	-0.57991	-0.621167
GTCGTCAAGAAGCACGTATA	neStops	YKR020W	VPS51	0	-0.285804	-0.912048	-0.620536
AAACCATAGTGTCTAAAGTC	eProvs	YOL021C	DIS3	0	-0.403421	-0.812371	-0.620515
ACCCGCAATTATATGAACGG	neStops	YGR271W	SLH1	0	-0.11948	-0.488735	-0.62016
TGGTCCCTTCAAGGAAAGAG	neProvs	YDR524W-C	YDR524W-C	0	-0.557595	-0.781681	-0.619835
CTCGGTTCAGTCCCCACTAA	neStops	YMR078C	CTF18	0	-0.229935	-0.347765	-0.619142
AAATCATTGGATTCGTTATA	neProvs	YDR375C	BCS1	0	-0.500411	-0.623764	-0.618746
ATCCTACAAGAGTCACAACT	neProvs	YPR009W	SUT2	0	0.229529	-0.351798	-0.618726
TTCCTCACGTGTGTTGGAAA	eProvs	YHR020W	YHR020W	0	-0.198989	-0.289349	-0.618606
ACTCCAGCATTGCGTAGAAA	neStops	YIR033W	MGA2	0	0.272843	-0.156885	-0.618388
TCCACGGGTACCACCATTGT	eProvs	YOR157C	PUP1	0	-0.195688	-0.438447	-0.618096
TCTTTCTAAAGCTGACTTGA	neProvs	YHR205W	SCH9	0	-0.864205	-0.873983	-0.61794
GTACTGATTCATCCGTTCTG	eProvs	YHR072W	ERG7	0	0.0036493	-0.171391	-0.617499
ATACCGTACTTACCGATCAA	eProvs	YLR355C	ILV5	0	-0.132898	-0.3819	-0.617386
GATACCCTTCAAAGTACCCA	neProvs	YPL009C	RQC2	0	-0.253396	-0.307296	-0.617314
ATCCTGTTTCCAATACACAG	neProvs	YMR026C	PEX12	0	-0.0619133	-0.339346	-0.61686
GCTCCCAAGGCTTGAAATCA	neStops	YCR081W	SRB8	0	-0.297903	0.374721	-0.616124
GGATCTGTCGGATATACAAT	neProvs	YDL080C	THI3	0	-0.023442	0.0613159	-0.615629
GGTCTACGTACTTTGGTTAT	eProvs	YIL048W	NEO1	0	-0.668622	-1.31063	-0.615539
TCTTCGCGAAAGAACTAAGC	neProvs	YGR270W	YTA7	0	-0.134143	-0.250996	-0.615434
GACCTTCTTCATAACTTATC	eProvs	YIL118W	RHO3	0	-0.154284	-0.322817	-0.615269
CTAGGACAAGAACTCCCCAG	eProvs	YPR107C	YTH1	0	-0.490039	-0.465596	-0.615015
CCATCAAAATAGATTTCATA	neStops	YOR113W	AZF1	0	-0.254572	-0.458023	-0.614631
CAACCATATCCGTACTTGGC	eProvs	YER023W	PRO3	0	-0.0377914	-0.183634	-0.614115
ATCACAATCCTTTAATTGTT	eProvs	YDL195W	SEC31	0	-0.0336283	-0.451701	-0.613383
AACACCTGCCCTAGAAGACA	eProvs	YOR151C	RPB2	0	-0.0820125	-0.334987	-0.612998
ACGCCAATGCATACTCTAAA	eProvs	YCR072C	RSA4	0	-0.289807	-0.577043	-0.612894
GTTCAATTCAATGTCGATAC	neStops	YER124C	DSE1	0	-0.091049	-0.28079	-0.612318
TGTCCCCTCTATCTCCGCTC	neProvs	YGR087C	PDC6	0	-0.347017	-0.520919	-0.611993
CTTCATCCATTTGTACGAAT	neProvs	YGL206C	CHC1	0	-0.139398	-0.172037	-0.61159
TTATTCCCTATTAAGGCATT	eProvs	YHR072W	ERG7	0	-0.417593	-0.838374	-0.611568
AATTCATGAAGAATCCAAAT	neProvs	YOR317W	FAA1	0	-0.176931	-0.279822	-0.611392
GTCCCCACAATCCTATTTAG	neProvs	YGL010W	MPO1	0	-0.366024	-0.776956	-0.610916
CTGCCAAATTTACTGAAGTG	eProvs	YPL043W	NOP4	0	0.0273046	-0.207844	-0.610708
ACAAAACAGAATGACCATGT	neStops	YHR029C	YHI9	0	-0.0254842	-0.487104	-0.610585
CTGGATCCTGGCGTCATGTA	eProvs	YDR047W	HEM12	0	-0.0237587	-0.116815	-0.609848
GAACCAAAAAATGCAAAAAG	neStops	YIR002C	MPH1	0	-0.105753	-0.25606	-0.609584
AACCAAAATAAGAGGGAACC	neStops	YAL026C	DRS2	0	0.266108	-0.289988	-0.60956
AGCGCCGAACCCAAGCGTCT	neProvs	YFL033C	RIM15	0	-0.251457	-0.327172	-0.609494
TCTGACCATATGTACAGAAT	neProvs	YGL101W	YGL101W	0	-0.424964	-0.522053	-0.609464
CATCGATGGCAATTATTTAA	neStops	YGR171C	MSM1	0	-0.228924	-0.30859	-0.609455
CCTCCTGTTTGTTTGCGTGA	eProvs	YPL237W	SUI3	0	-0.268795	-0.29373	-0.609244
TTACGGTCAGCAAAATATCA	neStops	YKL073W	LHS1	0	0.249879	-0.156429	-0.608566
TGTCTCCATAAGATTTCTTC	neStops	YGR124W	ASN2	0	-0.215994	-0.634335	-0.608441
CCACCAGGATACTTTAAGTT	eProvs	YPR161C	SGV1	0	-0.10123	-0.502747	-0.608417
TTTCCTGTCGAGGAGATTCC	eProvs	YGR274C	TAF1	0	-0.052658	-0.109229	-0.608286
TTGACTGATGGTAGATTCTC	eProvs	YJR016C	ILV3	0	-0.0525781	-0.538153	-0.608162
AACAGGTCGTGCAGCAAATG	eProvs	YDR243C	PRP28	0	0.0583685	-0.532407	-0.60798
TCCACTACAAAAATTTACTT	neStops	YBL088C	TEL1	0	-0.230514	-0.178687	-0.607297
TACTTTCCAGGATCAAAATC	neStops	YOR144C	ELG1	0	0.154269	-0.111552	-0.606963
ACCCGCAATACGTGGTCTCT	neStops	YPR024W	YME1	0	-0.137183	-0.331976	-0.606424
TATCTGCCCGTTGGGTGCAC	eProvs	YOL066C	RIB2	0	-0.118033	0.0249503	-0.606084
CAACCAACAATTGAATGTTT	eProvs	YLR115W	CFT2	0	-0.0121299	-0.0407664	-0.60607
GGCACTCAAAAACTATGGGG	neStops	YHR018C	ARG4	0	-0.00800888	0.0355658	-0.605919
GGCCACCATTCCAAATGCAA	eProvs	YJL050W	MTR4	0	0.0679095	-0.893361	-0.605839
TCTTACAATGTGGATTTGAA	neProvs	YGR165W	MRPS35	0	0.0475762	-0.187569	-0.605283
ACTACAGAATAGTTCACTAC	neStops	YGR125W	YGR125W	0	0.0272655	-0.0558492	-0.605269
GCAACCTGAAGCACATTTAA	eProvs	YGR005C	TFG2	0	-0.0369934	-0.149724	-0.605226
TGAACCCATTGTTCACTAGT	neStops	YLR027C	AAT2	0	-0.24911	-0.250513	-0.603576
ATTCCTCTTCTAATATGCAT	eProvs	YIL019W	FAF1	0	-0.209395	-0.281963	-0.603502
GCAACTACAAGATAATTCTC	neStops	YOL017W	ESC8	0	-0.0988629	-0.457836	-0.603295
AGGACAAGAGGCGGCAGTTA	neStops	YDR507C	GIN4	0	-0.393247	-0.0503869	-0.603153
AAACCTACCCAGGTGAGCGG	eProvs	YNL240C	NAR1	0	-0.445145	-0.593593	-0.602312
AGGTCCCTGTTATGGTAACC	neProvs	YNL071W	LAT1	0	-0.292983	-0.599145	-0.601554
ACTTCCCAATAGCTTTACAA	eProvs	YKL182W	FAS1	0	-0.529809	-0.446051	-0.601474
GGTACCTATCAACTTATGTA	neProvs	YOR371C	GPB1	0	-0.416461	-0.28908	-0.60085
GCAGAACCTCCAGTTATTGT	eProvs	YDR145W	TAF12	0	-0.535217	-0.763614	-0.600568
CACCTCACCGCCTGTAACCA	eProvs	YIL142W	CCT2	0	-0.694452	-1.12215	-0.600025
GCACCACAAAACGATAATGT	neStops	YDR466W	PKH3	0	-0.143506	-0.630944	-0.599757
CTCCAATCAATACGTTGACT	eProvs	YER012W	PRE1	0	-0.425005	-0.568805	-0.599617
TTACACCTGCGTTATTGAGT	eProvs	YNL290W	RFC3	0	0.242326	-0.0899308	-0.599121
ATGATTCTTACGCGAGTGCT	neProvs	YNL021W	HDA1	0	0.0368373	-0.24494	-0.599012
ACAACGAATACTATATCTTT	neStops	YOR070C	GYP1	0	0.135036	0.0808152	-0.598502
GTCCACCATTCGTTCACGTC	neStops	YDR388W	RVS167	0	-0.274898	-0.21084	-0.598488
GTAGACCACAAAGATTCCAT	neStops	YCR077C	PAT1	0	-0.0841603	0.194215	-0.598169
ACCCCTCCACCGGGTATCTT	neProvs	YER068W	MOT2	0	-0.280686	-0.596957	-0.597336
TTTCCCAATTCCAACTGAAT	neStops	YLR394W	CST9	0	-0.0637215	0.00799418	-0.597333
GTACCAGACAAGAAGTCCTT	eProvs	YDL055C	PSA1	0	-0.141035	-0.502428	-0.596813
TTGCTCCAGAGCACTTTACT	neStops	YJL092W	SRS2	0	-0.199568	-0.282541	-0.596589
GGAATCAAATATGGTTTGTT	neStops	YDR065W	RRG1	0	-0.171999	-0.247614	-0.595476
GACGCACGGCGTGATGATGT	neProvs	YMR012W	CLU1	0	-0.143228	-0.123728	-0.595444
TTTCCCGCAAGTTTCGCTTA	eProvs	YDL164C	CDC9	0	-0.2657	-0.410521	-0.595121
GATGGGCCTCCATTTGCCAC	eProvs	YBL076C	ILS1	0	0.0523254	-0.557675	-0.594603
ACTATTCCAAAATCTTCTAA	neStops	YGR243W	MPC3	0	-0.0113917	-0.153308	-0.594131
CAAGTCCTCCAAATATTATA	eProvs	YBR140C	IRA1	0	-0.0476554	-0.548595	-0.594058
GCCCCCTATTATTGGTTTAC	eProvs	YOR149C	SMP3	0	-0.104328	-0.150047	-0.593905
GCTAACATATGGGTCCATAG	eProvs	YKR068C	BET3	0	0.00213001	-0.180539	-0.593803
GATCACTTGCTAGCAACAAT	neProvs	YDR482C	CWC21	0	-0.031314	-0.133344	-0.592845
ATTGCCAACCAAAGAAACCG	eProvs	YKL182W	FAS1	0	-0.217563	-0.0783252	-0.592577
AACTTCCCCCTACAGTACGA	eProvs	YNR046W	TRM112	0	-0.606779	-0.402667	-0.592497
TTTCTTGCCGACAAACAATG	neProvs	YHR191C	CTF8	0	-0.0496936	-0.363899	-0.592238
TAACCCTCAACAGCAGAATG	neStops	YFR019W	FAB1	0	0.0210973	-0.127406	-0.592132
TGAACCGGCTATTCCATATA	eProvs	YNL163C	RIA1	0	0.259151	0.157548	-0.591794
GCCCGACAATAGTTAAGACG	neProvs	YLL063C	AYT1	0	0.0294306	-0.313161	-0.591444
TACGAACCAGTCTGGGCCAT	eProvs	YDR050C	TPI1	0	-0.0977397	-0.0517555	-0.59105
AAACACTCAAATATCCAATC	eProvs	YMR277W	FCP1	0	-0.47435	-0.943803	-0.590594
AACCACTTGGTAAAATCCAA	neStops	YKR058W	GLG1	0	-0.0272207	0.193018	-0.590479
CTAAATCTTCCATTAGACGT	neProvs	YGR081C	SLX9	0	-0.282313	-0.313451	-0.590085
GTTTCCTGACGATTTAATCA	neProvs	YKL191W	DPH2	0	-0.181006	-0.317229	-0.589924
AACCATCTTCCACAACTTGA	eProvs	YER133W	GLC7	0	-0.282139	-0.572902	-0.589855
GATGGTACCAGCATCCTTGG	eProvs	YJL034W	KAR2	0	-0.147809	-0.259414	-0.589648
ATTTACAGAGATGTTTGAGT	neStops	YPL047W	SGF11	0	0.13067	-0.386008	-0.589369
ATATTCCTGTTAGGATCAAA	eProvs	YDL141W	BPL1	0	-0.358121	-0.446037	-0.589358
TACTTTCAAAAGATTAAGAG	neStops	YOL055C	THI20	0	0.102793	-0.590417	-0.588837
TCCCCCTCCGAATCACAACA	eProvs	YFR051C	RET2	0	-0.174051	-0.120206	-0.58877
ATTGCATCTGTGATGGGTGG	neProvs	YDL210W	UGA4	0	-0.90427	-1.10217	-0.588742
CTATCGTTGTGGGATACTGC	eProvs	YIL118W	RHO3	0	-0.259629	-0.379321	-0.588645
GAACCAGAACTCTGACAGTT	neStops	YAR015W	ADE1	0	-0.408245	-0.680554	-0.588316
GGTAAACCCATTATCAAACC	eProvs	YGL137W	SEC27	0	-0.310679	-0.714332	-0.587758
TTTCTCCTTCACCTCTTTCT	eProvs	YPL217C	BMS1	0	-0.232493	-0.304826	-0.587618
CACCACCAGACACGGAAAAT	eProvs	YGL097W	SRM1	0	-0.351553	-0.491237	-0.587081
GTTACCTGATAGACCTTCAG	eProvs	YGR094W	VAS1	0	-0.423495	-0.560939	-0.586491
GTTAACTCCACAAGAGGAAT	eProvs	YKL022C	CDC16	0	-0.230416	-0.082464	-0.586357
AAAACAATTTGATATTGAAA	neStops	YOR049C	RSB1	0	-0.107961	-0.103128	-0.586072
ATTGTACCATTTCCCGTTTC	neStops	YDR323C	PEP7	0	-0.0332874	-0.0941325	-0.585614
CCTTACCTAGATCAGATAAT	eProvs	YKL203C	TOR2	0	0.0191368	-0.260592	-0.585381
GGTATTCAATTGGTCCTGAC	neStops	YHR031C	RRM3	0	0.160689	-0.384849	-0.585187
GTCGTGGCCTGGCGCTTGGT	eProvs	YPR035W	GLN1	0	-0.5169	-0.621556	-0.584789
TACCTACAGGCAAAGGGTCG	eProvs	YGR172C	YIP1	0	-0.234048	-0.209742	-0.584729
ATGTCCATTTATAACTTTGA	neStops	YHR048W	YHK8	0	-0.351175	-0.456145	-0.584599
GGCCATATTTGTGGCCCACA	eProvs	YLL031C	GPI13	0	-0.477491	-0.283495	-0.584566
ATTGAACAAGAGAACTATCT	neStops	YHL035C	VMR1	0	-0.18241	-0.103863	-0.584312
TTCCTCTACTATTCAATTAT	eProvs	YDL145C	COP1	0	-0.552315	-0.602316	-0.584252
TTCAACCGAGACAAAATGCT	eProvs	YPR104C	FHL1	0	0.0371034	-0.200513	-0.583302
ATTGGGCAGGGTAGATTGAT	neStops	YDR300C	PRO1	0	-0.161628	-0.303928	-0.583276
CCGCCCCTTAATTCACCAAA	neProvs	YMR207C	HFA1	0	-0.0854313	-0.307933	-0.583138
CCATAACAAGTACCCTTGTT	neProvs	YLR372W	ELO3	0	0.126532	0.020173	-0.583007
TCACCATCGAAGACCAAATA	neProvs	YOR033C	EXO1	0	-0.128021	-0.391073	-0.583002
GGCTTCACAAAAGTTAAGAC	neStops	YKL005C	BYE1	0	-0.0276487	-0.449242	-0.582761
GACCAATTTCATCTGATTTG	neProvs	YBR238C	YBR238C	0	-0.106293	-0.185512	-0.581446
ATTGCAAAGCGGCCACCGCA	neStops	YCL009C	ILV6	0	0.09457	-0.252273	-0.581259
GCTCAAGTCAGGAAGGAGAT	neStops	YOR099W	KTR1	0	-0.558309	-1.00057	-0.581243
ATCCCCTCAGAATTATACTT	neProvs	YLR361C	DCR2	0	-0.290328	-0.289047	-0.580419
GATTCACAAAGAACCAGAGC	neStops	YOL041C	NOP12	0	0.0952498	-0.297458	-0.580383
CAACCAGATGCATATAAATG	eProvs	YDR376W	ARH1	0	0.0885325	0.150479	-0.580172
ACCCCTTCAATTGTATACCT	neProvs	YFR013W	IOC3	0	-0.263739	-0.228508	-0.580051
GTACCGCTTTAGTTCTCAGT	neProvs	YKR089C	TGL4	0	-0.400862	-0.322724	-0.579912
CGGCTCTCAAATATGTAATA	neStops	YGL003C	CDH1	0	-0.250503	-0.293701	-0.579795
TCGGCTCTTTAGACTTCTTC	neProvs	YBR205W	KTR3	0	-0.0378884	-0.171316	-0.579588
TTTCCCTCTCTAGCGGAACC	neProvs	YHR046C	INM1	0	-0.446343	-0.631347	-0.579171
GTCACAAGCGAGTTTACAGA	neStops	YDR017C	KCS1	0	-0.0787452	-0.215234	-0.578923
GGCCAGGCTACGGCTTGAAT	neStops	YGL078C	DBP3	0	-0.319076	-0.455419	-0.578852
ACTCTCAGGAACAAATTGCA	neStops	YPR115W	RGC1	0	-0.216541	-0.056316	-0.578795
GATCACTCCGGAGCAACTCC	neProvs	YDR409W	SIZ1	0	-0.0382594	-0.541385	-0.578705
GTACCATGTAGTGGCATCGG	neStops	YBR112C	CYC8	0	-0.252393	-0.58092	-0.578296
CAAGATCCTAGAAGTGTGAC	eProvs	YAL001C	TFC3	0	0.118252	-0.126242	-0.577464
GTTCATACAATCCTGATAAA	eProvs	YNL287W	SEC21	0	-0.46868	-0.753767	-0.576766
ATTACAGGTCTAAATGGGTC	eProvs	YFR031C	SMC2	0	-0.0252482	-0.594735	-0.576476
ATGATCAAGTTATTGCTTTG	neStops	YMR217W	GUA1	0	0.145801	-0.81301	-0.575999
CCGTGACCTCTCATCCAGAT	eProvs	YHR069C	RRP4	0	-0.249685	-0.870211	-0.575985
ATATTACCTGCATGCATCAC	eProvs	YLL031C	GPI13	0	-0.0100159	-0.172827	-0.575975
ACTAGTGCAAACAGCAATTA	neStops	YPL176C	TRE1	0	-0.472445	-0.345782	-0.575972
TCTCAGACGTCTGCGGGGCC	neStops	YGL175C	SAE2	0	0.00352072	-0.696607	-0.575933
ATAACCCCTTTCTGATAAAT	eProvs	YPL020C	ULP1	0	-0.21996	-0.171969	-0.575411
TTTCCCCTGTGGAATTGGGA	neProvs	YNL280C	ERG24	0	-0.0738304	-0.5453	-0.575065
TCGTCGTTATGCGCTATTGT	neProvs	YPL224C	MMT2	0	-0.159986	-0.412437	-0.57474
CAAATCTCAGTATGAGATGA	neStops	YOR140W	SFL1	0	-0.168143	-0.205856	-0.574236
GAATTCCATTTCACCCTGCG	neStops	YGR093W	DRN1	0	-0.428576	-0.448843	-0.573613
ACCTTGACCAGTGAAAACGA	eProvs	YKL182W	FAS1	0	-0.276417	-0.635623	-0.573127
GCAGTTGCCCAAGAGTGCCA	eProvs	YNL282W	POP3	0	-0.0592968	-0.467091	-0.573027
ATTCCAATGGTTGTCTTTAC	eProvs	YMR108W	ILV2	0	-0.00365425	-0.767503	-0.573008
GCACCGTTAACAAGAATCAT	eProvs	YNL088W	TOP2	0	-0.367939	-0.459469	-0.572857
CCACCTTTCATGGTCATCAG	eProvs	YNL062C	GCD10	0	-0.211642	-0.31622	-0.572529
AACCAAACATCTGTGTATAA	neStops	YDR176W	NGG1	0	-0.391435	-0.228458	-0.571709
TTACATCGATACGAACTCTT	neStops	YOL138C	RTC1	0	0.0400949	-0.339012	-0.571688
GTATCGTTTCAGAAATCATT	neProvs	YJR066W	TOR1	0	-0.0587231	-0.201216	-0.571627
TTCGACATGTTCTGTTGCAG	eProvs	YNL061W	NOP2	0	0.0110264	-0.546907	-0.571223
TCAATCCAGAAATCAGAGCA	neStops	YGL016W	KAP122	0	-0.102168	-0.0494785	-0.570972
ACTAACTCACAGGAAAATGA	neProvs	YCR084C	TUP1	0	-0.096756	-0.413487	-0.570858
TTCCCTCTCTATAAAAACAA	neProvs	YPL119C-A	YPL119C-A	0	-0.268483	-0.698442	-0.570476
GGGGCCCTTTGCTGTACCTG	eProvs	YHR070W	TRM5	0	-0.0965588	-0.499887	-0.570256
TTTCCCATTCGAGTTCCGCT	eProvs	YHR197W	RIX1	0	-0.287075	-0.375956	-0.570126
AACATAACCTATGACATCAT	eProvs	YDR238C	SEC26	0	-0.927492	-1.43566	-0.5701
TGCTGCCAGGTGTTGATATT	neStops	YOL051W	GAL11	0	-1.06159	-1.06097	-0.570073
CACAAATCAAGACAGTATTG	neStops	YIR033W	MGA2	0	0.216846	-0.707074	-0.569911
CAAAACCTCCAATTACCTTA	eProvs	YNL061W	NOP2	0	-0.240557	-0.544761	-0.569345
ACTTACTCACCAGCCCAAAT	eProvs	YJR045C	SSC1	0	-0.0889419	-0.556259	-0.5691
TTTGACTCAAGCGGAAATCG	neStops	YOR296W	YOR296W	0	-0.0450185	-0.226652	-0.569089
TTTGGGCCCAGTGTCTTCTA	neProvs	YBR001C	NTH2	0	-0.769136	-1.42457	-0.568573
TTCCACATGGCGTTGAAAAC	neStops	YMR087W	YMR087W	0	0.104359	0.0423944	-0.568573
CTCCCTCTTCCAGCCCCTTG	eProvs	YJL111W	CCT7	0	-0.845791	-0.728943	-0.568544
GCATCCCCCCCGTAACACAA	neProvs	YLR165C	PUS5	0	-0.246332	-0.223755	-0.567861
CACCAATCGCAATAAGTTCT	neProvs	YBR294W	SUL1	0	-0.118283	-0.408981	-0.567577
ACAAACAGATGGGCAATCCG	eProvs	YLR378C	SEC61	0	-0.329965	-0.193796	-0.567036
GTCCCTAATTCAGTCTTTGG	neProvs	YPL023C	MET12	0	-0.218044	-0.504899	-0.566756
GATCCAAGCTGCAGGTGAGA	neStops	YBR068C	BAP2	0	-0.0245946	-0.266981	-0.566744
GTAACCCTAACAATGAACAT	neProvs	YBR117C	TKL2	0	-0.074337	-0.194434	-0.56633
GGCCCGTCAATCGCTTGATT	neStops	YBR059C	AKL1	0	-0.169657	-0.199116	-0.566185
CTCTTCCTGTTATCAACTTA	eProvs	YLR115W	CFT2	0	-0.311965	-0.226187	-0.565829
ATACCCAGAAGATTTATGAA	neProvs	YPL069C	BTS1	0	-0.222387	-0.342676	-0.565667
TTTACAAAATGCTTTAAAAA	neStops	YDR422C	SIP1	0	-0.209333	-0.286267	-0.565604
GGTCGTATTGCGCCAAGGTC	eProvs	YBR252W	DUT1	0	-0.312987	-0.616484	-0.565364
TGCACCAATATTACCCGTTA	neProvs	YPL040C	ISM1	0	-0.0811629	-0.3877	-0.56527
ATATCCTCCAAGATTTCATC	neStops	YOR070C	GYP1	0	0.0727509	-0.136693	-0.564904
CAATTGCAGAACAACCATTG	neStops	YOR069W	VPS5	0	-0.513759	-0.436157	-0.564556
CCCTTCCCACTGCCGTTACA	neProvs	YNL017C	YNL017C	0	-0.556485	-0.505883	-0.56441
ATCTTTCCTGACCTTGTTCT	eProvs	YLR153C	ACS2	0	-0.346521	-0.58289	-0.564205
GCGGCACTCAAGTGGTGACA	eProvs	YHR062C	RPP1	0	-0.518006	-1.14392	-0.563963
ACCCTTGTAACCCATCACAT	eProvs	YML085C	TUB1	0	-0.493846	-0.47697	-0.563614
GTTGCACAAAATGTCCATGA	eProvs	YDL140C	RPO21	0	0.00899086	-0.478618	-0.563481
TCCCAAATAAAAATGATACT	eProvs	YKL125W	RRN3	0	0.043794	-0.349894	-0.562221
AATCTGTCACTTTATTTATC	eProvs	YML049C	RSE1	0	-0.111025	-0.140703	-0.562079
ATTCCAAAATGGGAATTTAA	neProvs	YPL139C	UME1	0	-0.114611	-0.184749	-0.562047
GTCTATCCCACGCGAAGTAT	eProvs	YDR434W	GPI17	0	-0.0529562	-0.55231	-0.561923
TGAGTACCTTTACCGGCACC	neProvs	YDR226W	ADK1	0	0.036788	-0.413224	-0.561716
GGTCACTTGCAAATTCTGTA	eProvs	YJR016C	ILV3	0	-0.0290452	0.0106128	-0.560928
ATAACACCAATGATATACCA	neProvs	YDR438W	THI74	0	-0.10073	-0.314058	-0.560894
CTAACCCCACAAGCATTACA	neProvs	YDR127W	ARO1	0	-0.178366	-0.225146	-0.560687
AGCTCAAAAGGAGAAGAACA	neStops	YAL035W	FUN12	0	0.0128095	-0.70391	-0.559399
CCTCCCATAAGAATTAGTTC	eProvs	YJL076W	NET1	0	-0.415946	-0.570093	-0.558843
GAACCATATTATCTTCTGGA	neProvs	YDR179W-A	NVJ3	0	-0.0967419	-0.332699	-0.558764
GTTGAGTCAAGAGAAGAACT	eProvs	YGR029W	ERV1	0	-0.196134	-0.347139	-0.558557
ATCAAACCAGACAAGGCAAT	eProvs	YGL225W	VRG4	0	-0.0353636	-0.683937	-0.557778
TGAAACCTAATTGTTGTACA	eProvs	YOR232W	MGE1	0	-0.0677333	-0.368983	-0.556854
ATGTCACAAACTGCAAATAG	neStops	YGR281W	YOR1	0	-0.00724966	-0.319137	-0.556771
GGAACCCTGCGGGAACAGCA	neProvs	YBR208C	DUR1,2	0	-0.198453	-0.153099	-0.556612
ACGGCCGAAACCTCTATCGA	eProvs	YOR207C	RET1	0	0.0579138	-0.0552453	-0.556502
CAATTCCTTCTGCTACAAAA	eProvs	YDR160W	SSY1	0	-0.0737619	0.0300068	-0.556125
AGGATCCCAGCAGTGGAGTA	neStops	YCL008C	STP22	0	-0.295528	-0.496561	-0.555784
CCCCAATCAGGACAGAGAAT	neStops	YDR448W	ADA2	0	-0.368428	-0.599807	-0.555521
CATACCTTTGCCCGGCTCAT	neProvs	YNL068C	FKH2	0	-0.34368	-0.507444	-0.555413
CTTTACAAAGACAAGATAGA	neStops	YHL029C	OCA5	0	-0.168371	-0.139488	-0.555066
TGAAACATCCCGTGGATGCT	neProvs	YBL033C	RIB1	0	0.00591091	-0.155941	-0.554947
ACATTCCAAAACCTAACCGA	neStops	YDL095W	PMT1	0	0.0678122	-0.239036	-0.554907
ATTACAAATACTTACAATAT	neStops	YLR039C	RIC1	0	0.251368	-0.314488	-0.554642
CTCACAAAAGACATGGCCAC	neProvs	YDL074C	BRE1	0	-0.215517	-0.317468	-0.554321
TTCCACGACCCTCTATTACT	neStops	YOR114W	YOR114W	0	0.0393071	-0.183062	-0.551645
TTTGGCATCCGAGGGAAGCT	eProvs	YMR049C	ERB1	0	-0.0653003	-0.469375	-0.551564
ACCTTCTCCATTGGTGTTCT	eProvs	YMR296C	LCB1	0	-0.654572	-0.773126	-0.551485
GGGGAACAGTTCTTCATCAA	neStops	YLR343W	GAS2	0	-0.320924	-0.324658	-0.551284
ATTCAACTTTAAATCATATA	eProvs	YDL145C	COP1	0	-0.0479354	-0.259127	-0.551217
GTTCCTCATTGCGAAGGCGA	eProvs	YGL169W	SUA5	0	-0.361192	-0.140189	-0.550058
ATCACACAAGTAGGTCAAGG	neStops	YGR092W	DBF2	0	-0.0738801	-0.872412	-0.549824
CGTTTCCCACCTGAACCTTC	eProvs	YGL245W	GUS1	0	-0.0720462	-0.27519	-0.549457
GCTTCAGGAGGAGTTTGGAG	neStops	YDR334W	SWR1	0	-0.197645	-0.701428	-0.549443
CCACCAGACAATGTACCCTC	eProvs	YFR031C	SMC2	0	-0.1652	-0.428417	-0.548915
TCACTATAAAGACGACCGCA	eProvs	YMR301C	ATM1	0	-0.166361	-0.345233	-0.548495
GCACAAGAACCAGAAATCGC	neProvs	YOR090C	PTC5	0	-0.536417	-0.589593	-0.548201
TTTCAAGAGGATGAACATAT	neStops	YKL155C	RSM22	0	-0.0275797	-0.223201	-0.547991
GCATACCTGATATGATCATA	eProvs	YOL094C	RFC4	0	-0.189367	-0.236513	-0.547631
CAATGCAAGGTGATGCTCTT	neStops	YPR135W	CTF4	0	-0.020362	-0.0857325	-0.547517
TGATCAACAGGATACAAATG	neStops	YPR141C	KAR3	0	-0.208793	-0.419637	-0.547241
CATTCCTCAAGGTACTGACT	neStops	YMR303C	ADH2	0	-0.294206	-0.481364	-0.547024
TTAGCACAAAGAATCAATAT	neStops	YPL058C	PDR12	0	-0.181357	-0.351621	-0.545695
ACCTTCACCTCTCTTAACAG	eProvs	YGL008C	PMA1	0	-0.214536	-0.547711	-0.544981
TTTCACAAGTTAAAGTAAAT	neProvs	YBR281C	DUG2	0	-0.14501	-0.25991	-0.544968
GCGATACCACCAGGGAGCAA	neProvs	YPR026W	ATH1	0	0.0837539	-0.141829	-0.544964
AGAACGTATTGCTCGTTACA	eProvs	YDL084W	SUB2	0	-0.116159	-0.202664	-0.544255
AGCAGCAACAGCAGCATGCC	neStops	YAL021C	CCR4	0	-0.329671	-0.207268	-0.544255
TTCCAACTTCAATCTATCCA	neStops	YEL023C	YEL023C	0	0.0245302	-0.492984	-0.544125
TGGTGTTCGCCGTTCATATG	neProvs	YOR330C	MIP1	0	-0.121972	-0.429799	-0.543932
AAGACCAGCGGTCTCCGCTA	eProvs	YJL008C	CCT8	0	-1.52538	-1.54049	-0.543842
ATTCCAAAGCCCGGTCCCTC	neStops	YLR425W	TUS1	0	-0.393623	-0.462111	-0.543655
AGCTCCCAAAGCTTTAAGTC	neStops	YLR172C	DPH5	0	-0.342835	-0.388096	-0.543342
AAACCTTCATTAAATCTCTT	eProvs	YCL004W	PGS1	0	-0.182885	4.3947e-05	-0.542947
TTTCGTATTGGCAGGAAGAT	eProvs	YPL204W	HRR25	0	-0.0577417	-0.20687	-0.542441
TTTATACAACCTGTTATCTA	neStops	YKL212W	SAC1	0	0.264755	-0.0397485	-0.542205
TTTCCACGACTCATCAATTG	neStops	YER106W	MAM1	0	0.106254	-0.121169	-0.542201
TAATTTCGCCAGATGCTGGT	neProvs	YHL011C	PRS3	0	-0.0667097	-0.012372	-0.542074
CCAACAACTGCAAATAGAGA	neStops	YPL270W	MDL2	0	-0.0656015	-0.0680328	-0.541676
ATGTTCACCATGATAAGCTC	eProvs	YNL137C	NAM9	0	-0.533222	-0.167397	-0.541599
TACATACCACCACAAGAACC	eProvs	YJR016C	ILV3	0	-0.336776	-0.514958	-0.541576
GTCGCACGAAGAAAGAATCC	eProvs	YFR051C	RET2	0	-0.197631	-0.334501	-0.541467
TTTCCGCAGCAAGAGACAAA	neProvs	YDL095W	PMT1	0	-0.221796	-0.152615	-0.540978
AATTCACAAATAGGTCTGTC	eProvs	YPR107C	YTH1	0	-0.766259	-0.569144	-0.540461
TCCTCCAAGGAGAAAGCATA	eProvs	YDL029W	ARP2	0	-0.120811	-0.334165	-0.540397
TATTTCAGGAATGGGCCCAG	neStops	YJL062W	LAS21	0	-0.397112	-0.278435	-0.540279
GGCACAACGTGGACATGAAA	eProvs	YKL095W	YJU2	0	-0.13664	-0.47779	-0.53942
TTTGACACCAATCAGTAAAG	eProvs	YKL104C	GFA1	0	0.0464881	-0.798945	-0.539376
CTTCCTTCTACAAATAAGAT	eProvs	YKL078W	DHR2	0	-0.174277	-0.476339	-0.539341
GTCAACCAAGAAGCCATCAA	neStops	YOL126C	MDH2	0	0.110657	-0.317682	-0.539314
ACCAAATCAGAGAATTGATT	neStops	YPL254W	HFI1	0	-0.194049	-1.03076	-0.539309
TACAATCCAGTTGTGTGTTC	eProvs	YPR181C	SEC23	0	-0.0174935	-0.392962	-0.539055
GCTCCTTCCATGGACAGAAT	neStops	YER156C	YER156C	0	0.0727146	-0.11679	-0.53895
TTTCTTTGGCCGATAATATA	eProvs	YNL088W	TOP2	0	-0.286941	-0.0903979	-0.53869
AAACTATCAGCCAGGTGTAC	neStops	YNL185C	MRPL19	0	-0.113063	-0.159409	-0.538335
TATCGTGAGGATGAAAAATT	eProvs	YPR161C	SGV1	0	-0.0877826	0.036355	-0.537303
ATGAACACCAGGTTACATGT	neStops	YOL019W	YOL019W	0	-0.215427	-0.200499	-0.53713
CCACACAAGAATCCCGCGAA	neStops	YNR006W	VPS27	0	-0.243854	-0.254969	-0.536895
GTGAGACCATCTATCCGCCA	neProvs	YER145C-A	YER145C-A	0	-0.482865	-0.984061	-0.536635
CCAACACATCAAAGGAGGTT	eProvs	YBR190W	YBR190W	0	-0.86736	-0.794932	-0.536534
GTATCCCTCCGGATCAACAG	neProvs	YLL039C	UBI4	0	-0.0465104	-0.338558	-0.536113
ATCCTACAAAACACTTAACG	neProvs	YBR225W	YBR225W	0	-0.175407	-0.341371	-0.53601
ACGTTCCCACAAATATTCAT	neProvs	YMR279C	YMR279C	0	-0.295583	-0.267384	-0.535995
CCGTACCCAATTGAGAACCA	eProvs	YGR264C	MES1	0	-0.693165	-0.738953	-0.535882
CTTCTCGAAGGGGACCTGGC	neStops	YDR310C	SUM1	0	0.0970484	0.0398351	-0.535874
GTTCCACCAAGCTCATCGCA	neProvs	YOL131W	YOL131W	0	-0.474414	-0.24138	-0.535662
CTCGGTACAGATGGGTTCAT	eProvs	YHR188C	GPI16	0	-0.797833	-1.2037	-0.53507
TCTGCAAAGTACACCTAATA	neStops	YMR212C	EFR3	0	-0.0513549	-0.207245	-0.534914
GGCACCACCGGTTGGTCTTG	eProvs	YML126C	ERG13	0	0.0427279	-0.111	-0.53468
ATTATCTCCGGATATGACCA	neProvs	YDR075W	PPH3	0	0.190411	-0.529886	-0.534673
GCTTTCCAAGATGGAAGACC	neProvs	YIL043C	CBR1	0	-0.429402	-0.516684	-0.534574
CTGCACCTCACGATATCAAG	neProvs	YLR241W	CSC1	0	0.0503032	-0.437694	-0.534401
ATGTCAATTGTTTCACTGTT	neProvs	YJL115W	ASF1	0	-0.52527	-0.271195	-0.534146
GGTAAACAACATGATATAAG	neStops	YJL106W	IME2	0	-0.264205	-0.366347	-0.534013
ACCACAATGAGGTCTTCCAG	eProvs	YGR185C	TYS1	0	-0.0638397	-0.410814	-0.533907
CGAGACGTATCGAAAAGCAT	eProvs	YER025W	GCD11	0	-0.309307	-0.559177	-0.533617
ATCAGTACCTGTGGTAAAGA	neProvs	YGR171C	MSM1	0	-0.185035	-0.205933	-0.533555
CTTCCACAAAGGCGTTAATA	neStops	YOR125C	CAT5	0	0.107432	-0.389898	-0.533335
TCGCCGATTTCATTGATTTC	eProvs	YML064C	TEM1	0	-0.261414	-0.282648	-0.533259
TTTGCCAAAACTCAAAATCT	neStops	YLR382C	NAM2	0	-0.0653178	-0.217426	-0.533113
AAGTCACAAAGTAAGTACGA	neStops	YDR146C	SWI5	0	0.0183068	-0.276642	-0.532921
CCTACCTCTAGGCAATATCG	neProvs	YPR024W	YME1	0	-0.130018	-0.28922	-0.532876
TCCTTCAAACAGGAAATTTG	neStops	YDR206W	EBS1	0	-0.180735	-0.245316	-0.532865
ATACAAAAATATGTAACTCC	neStops	YDR136C	VPS61	0	-0.148286	-0.36905	-0.532297
CCTGGGCGCGGAGATTATCA	eProvs	YKL045W	PRI2	0	-0.598709	-0.636718	-0.532196
CTCTTCCAACTCTGGTTCCA	neProvs	YDR322W	MRPL35	0	-0.605806	-0.810474	-0.531875
GGTACATTTCACCCCTCTAC	neProvs	YPR184W	GDB1	0	-0.121891	-0.402857	-0.531761
TTACCACCTTTACCTCACAC	neProvs	YOL036W	YOL036W	0	-0.0442088	-0.252168	-0.531705
GACTACTATGTTCTTACCAA	eProvs	YGL008C	PMA1	0	-0.616817	-0.653863	-0.531278
AACACAGTTTGAACGATTCA	eProvs	YBR004C	GPI18	0	0.134914	0.190087	-0.531253
GCGTGCATTCTAACATGAGT	neProvs	YHR204W	MNL1	0	-0.220847	-0.442958	-0.531153
CTGCTACAATATATCCCTGG	neStops	YBR028C	YPK3	0	-0.354138	-0.095998	-0.530787
GATACCTCGGTTATAAGAAG	neProvs	YPR011C	YPR011C	0	-0.280059	-0.108031	-0.530575
AGGTCCCTTTCTGATTCTAC	neProvs	YEL024W	RIP1	0	-0.36672	-0.590565	-0.529886
CTACGTCTATTTGAGTACGG	eProvs	YER133W	GLC7	0	-0.25742	-0.149731	-0.529777
TTGGCCATGTGGATGTAAGT	neProvs	YBR018C	GAL7	0	-1.85597	-1.05891	-0.529028
TCCGCCATACTGCGATGTGG	eProvs	YHR102W	KIC1	0	0.0111384	-0.343833	-0.528641
ACGTTACCCATGGCCAATGC	neProvs	YPL061W	ALD6	0	-0.0363642	-0.334764	-0.528611
GCTCCAGCCGTTGAACTGCA	eProvs	YPL231W	FAS2	0	-0.361968	-0.33663	-0.528574
ACCTCCAAAAAAGGCCATTA	neProvs	YPL003W	ULA1	0	-0.180219	-0.206401	-0.528134
CTCCTTTCACCACTTGCAGC	eProvs	YLL035W	GRC3	0	-0.0139722	-0.313767	-0.527349
CCGCAGGACCAGACATCGCT	neProvs	YKL101W	HSL1	0	-0.390992	-0.489252	-0.527003
CTCCACATTAGAGCAATAGC	neStops	YGR256W	GND2	0	-0.410085	-0.383999	-0.526979
GTCATCCATGGGTACCACTT	eProvs	YLR305C	STT4	0	-1.01812	-1.00415	-0.526979
AGAACAGCACTATATCTTAT	neStops	YOR193W	PEX27	0	-0.37784	-0.849561	-0.52686
TGTCACGATGGAACACCCAA	neProvs	YAL049C	AIM2	0	-0.278284	-0.17059	-0.526691
TCTCCACATAATTGAATTAT	eProvs	YHR197W	RIX1	0	-0.0611895	-0.127169	-0.526688
TCTAATCAAACGAACGCGAA	neStops	YJR060W	CBF1	0	-0.214172	-0.319426	-0.526479
TTCCCCGATTTGTGTCACAA	neProvs	YGL148W	ARO2	0	-0.0736752	-0.915007	-0.526416
GCTCCTCGACGTATTTCGCT	neProvs	YIL156W-B	YIL156W-B	0	0.00668283	-0.180744	-0.526284
GATCACTTACAAAATACAAA	eProvs	YMR290C	HAS1	0	0.226008	-0.297393	-0.525148
GTGTGCCTGTGATTAACATA	neProvs	YER164W	CHD1	0	0.198361	-0.108167	-0.524635
CTTCGGTCAAAGTATAATCA	neStops	YBL047C	EDE1	0	-0.0129785	0.105433	-0.524499
GCCAATTCTACAAATGTGAA	neProvs	YBL015W	ACH1	0	-0.167578	-0.200035	-0.52409
TTTCCTACCAATTCCTTTCT	neProvs	YNL138W	SRV2	0	0.0235458	0.00506575	-0.523899
TATAGACAGCTGCCCAATGC	neProvs	YBR020W	GAL1	0	-0.577254	0.0858778	-0.523472
CGTCCTTCCAATAAACTGTA	neStops	YMR207C	HFA1	0	-0.265068	-0.460489	-0.523338
CGACTCTCCCGGATTAAAGT	neProvs	YOR124C	UBP2	0	0.00414319	-0.22039	-0.523307
ATCGTCCAAAAAATGTATGG	neStops	YBR084W	MIS1	0	-0.431307	-0.356408	-0.523053
TACCTACAAAGTAAACATTC	neStops	YOR162C	YRR1	0	0.0569023	-0.211677	-0.522875
TTACCGTGGAAAACTTTATA	eProvs	YDR331W	GPI8	0	0.370354	-0.681467	-0.521969
AGTTACCTGAAGGAGCAGCG	eProvs	YCR035C	RRP43	0	-0.322987	-0.520227	-0.521954
ATGATTCACTATGAACCATT	neProvs	YGR234W	YHB1	0	-0.0551417	-0.357477	-0.521576
GGCCAGAAGGAAACCAAATG	neStops	YIL005W	EPS1	0	-0.159967	-0.337501	-0.521321
AGCAGCCCAGTAAAAAGCTG	eProvs	YGR098C	ESP1	0	-0.0765285	-0.702055	-0.521105
TGTCACCAGTATCTAAAGCT	eProvs	YCR072C	RSA4	0	-0.138089	-0.482486	-0.520473
TGCCGTCCAAGGTTCAAACG	neProvs	YNR015W	SMM1	0	-0.488749	-0.23451	-0.520426
AGCCGTAACCAAATACAAAC	eProvs	YGR046W	TAM41	0	-0.103697	-0.405671	-0.520389
TAGAATTCCCCTTTCTGTGG	neProvs	YOR161C	PNS1	0	-0.11812	-0.216282	-0.520268
GTTTCCACTTCTTACTTATA	neProvs	YLR303W	MET17	0	-0.333646	-0.152282	-0.520024
TCACAGGAAGATATTAGTCT	neStops	YDR264C	AKR1	0	-0.699602	-0.579815	-0.519779
GTTCAACCATATATTGCACT	neStops	YLR189C	ATG26	0	0.0345334	-0.22006	-0.519388
GCACTATCACATTTCCATTC	neProvs	YNR039C	ZRG17	0	0.0569852	-0.0494027	-0.519025
TTTCCAACCGAAACTGTTTA	eProvs	YGL169W	SUA5	0	-0.271755	0.0598288	-0.517827
ATACGATATAAAAAATCTTT	neStops	YJL129C	TRK1	0	-0.0914585	-0.126381	-0.517439
ATGCCATTCCCCCATGTAAT	neStops	YAL058W	CNE1	0	-0.209588	-0.297574	-0.516949
TTTCCTCATAAGGATATCAT	eProvs	YJL125C	GCD14	0	-0.0429637	-0.148892	-0.516592
AATATCGTTCACCGATTATT	neProvs	YNL012W	SPO1	0	-0.35679	-0.0262623	-0.516365
TTTCACCGTCGTCGTCAGAA	neProvs	YAR014C	BUD14	0	0.190479	-0.544934	-0.515937
TTATTCCCAAGGGCAGTGAT	eProvs	YOR250C	CLP1	0	-0.413236	-0.51538	-0.515889
GTGGTCAAGAAATTGCACTC	neStops	YNL127W	FAR11	0	-0.166947	-0.580387	-0.51538
TTTCTTCAGACGCTGTACAT	neStops	YHL030W	ECM29	0	-0.091868	0.222291	-0.515312
CCTTGTGCATTATATAATCG	eProvs	YEL035C	UTR5	0	0.0108936	-0.128975	-0.514676
TGAACCACCTGAAAGAACAA	eProvs	YDL029W	ARP2	0	-0.856805	-0.769084	-0.514451
GTACAACCAGTTGAGGGAGA	neStops	YGR092W	DBF2	0	-0.0776864	-0.679313	-0.514354
ATACCTGGATAAGAATATCC	neProvs	YKL054C	DEF1	0	-0.245154	-0.571126	-0.514174
TCCACAAATCCAATTACCAC	neStops	YKL205W	LOS1	0	0.051433	-0.276321	-0.514046
GTTGTTCCTCCAAAACACAG	neProvs	YBR180W	DTR1	0	-0.0456932	-0.173549	-0.514013
GCTGCACCAGAAATTGTATC	neProvs	YDR507C	GIN4	0	-0.0984747	-0.306002	-0.513888
TCACACTCTTGGGTACACGA	eProvs	YGR211W	ZPR1	0	-0.181644	-0.244174	-0.513699
TACCCACAATTGTACAAATT	neStops	YAL026C	DRS2	0	0.231216	-0.404035	-0.513597
GCTCTCATTACTAATTATGG	neProvs	YOR016C	ERP4	0	-0.142341	-0.287326	-0.513145
GACCAACATAAGTCGAGGCT	neStops	YAL067C	SEO1	0	-0.0984275	-0.0832405	-0.512671
ACCCATTTAACACCTGCCAT	neProvs	YBR115C	LYS2	0	0.00205654	0.068396	-0.512657
ATCCCCACGTTATTTATGTG	neProvs	YLR081W	GAL2	0	-0.880615	-0.835785	-0.512305
TGTTCCAAACCCAACTCTCT	neProvs	YML032C	RAD52	0	-0.195366	-0.281256	-0.51219
GGTCAAATTCCGGCTCTCAT	neStops	YBR294W	SUL1	0	0.224353	-0.0477604	-0.511438
ATTCACTACGATAGAATAGG	eProvs	YOR335C	ALA1	0	-0.139586	-0.48995	-0.511398
GGGGCGCAACATGCAATTAT	neStops	YDR291W	HRQ1	0	-0.127616	-0.226381	-0.510866
ACCAACACATATATTCAATA	neProvs	YGL195W	GCN1	0	-0.24424	-0.21651	-0.510652
GCTGCCCTGTAAATGCGTCA	neProvs	YLR371W	ROM2	0	-0.19789	-0.372519	-0.510133
ATTCACTGCCAGCACTTTAA	eProvs	YJL086C	YJL086C	0	-0.283705	-0.0622777	-0.50933
GTTTACATAGGGAAACATAA	neProvs	YBL067C	UBP13	0	-0.153596	-0.144604	-0.508878
CTCCTATAAATAACTTAAAT	eProvs	YHR164C	DNA2	0	0.103618	0.117117	-0.508738
GTAACCCAAGAAAACTAAAA	eProvs	YLR009W	RLP24	0	0.129105	-0.355054	-0.508578
CCCGCCAAAATAAGTTACTC	neStops	YKL134C	OCT1	0	-0.336417	-0.132077	-0.5081
ACAAAGTCAACGGCATATAG	neStops	YDR221W	GTB1	0	-0.0507769	-0.19603	-0.507898
TGCCAACAAAACGTTCCATT	neProvs	YMR294W	JNM1	0	-0.120349	-0.116442	-0.50773
AGCCAGAATTAAAAACCACG	neProvs	YOR268C	YOR268C	0	-0.23246	-0.414366	-0.507431
CCCTCAATCTGATGTTGGTA	neStops	YJL102W	MEF2	0	0.0420888	-0.107785	-0.507305
TTCACCACTACTCAAAAACT	eProvs	YOR110W	TFC7	0	0.149809	0.0419057	-0.507133
ATTCCACCCGAAGAGGCGTT	eProvs	YMR047C	NUP116	0	0.0255431	-0.843153	-0.506601
CTTCCAATATAGGAAGAACT	neStops	YAL053W	FLC2	0	0.052823	-0.0684336	-0.506389
GCATGATCAAATTCTGGTAA	neStops	YFL049W	SWP82	0	-0.0597415	-0.0764395	-0.506294
TGTCTTCAGAGCTGCACAAG	neStops	YOL160W	YOL160W	0	0.0331664	-0.117401	-0.50606
GTCTTTACCCAATAAGGCAA	eProvs	YLL008W	DRS1	0	-0.185143	-0.399673	-0.505971
GCTCTGCGGAAGAGACGAAC	eProvs	YNL240C	NAR1	0	-0.124549	-0.287096	-0.505738
AATTCAAGCCGAAAAAAGAA	neStops	YNL059C	ARP5	0	-0.136984	-0.225881	-0.505198
ATCTCCACTCATGGACATGT	neProvs	YOR045W	TOM6	0	-0.0812371	-0.151911	-0.505054
ACCAGCAGTTAAAAATTAGG	neStops	YLR393W	ATP10	0	0.101918	-0.2659	-0.504966
AACTGAACAGCTAAAGGAGT	neStops	YKR031C	SPO14	0	-0.243824	0.103413	-0.504787
TATACAAGATAAAGGAAGCT	neStops	YMR283C	RIT1	0	-0.0252606	-0.234163	-0.504629
CCTACTCGTTTGGTCATGGT	neProvs	YJR077C	MIR1	0	-0.227993	-0.43206	-0.504519
TTTCCGCCATCAAATCTCAG	neProvs	YFR026C	ULI1	0	-0.307964	-0.339858	-0.504495
TCTGCAGCGCACACCCCAAA	eProvs	YML010W	SPT5	0	-0.294141	-0.397261	-0.504318
CTCTGATCCACAGTCCGTAT	neProvs	YGR217W	CCH1	0	0.0319465	-0.465981	-0.503593
GCAGCCCCACGTGGAAAACA	neStops	YNL125C	ESBP6	0	0.214063	-0.318806	-0.50316
AAACCTGAAAATATACTAAT	eProvs	YPL209C	IPL1	0	-0.154008	-0.410324	-0.503067
GCTTTACAAAGACAAGATAG	neStops	YHL029C	OCA5	0	-0.1115	-0.202331	-0.503053
GTTGTCTCTTCACCAGCAGA	neProvs	YBR218C	PYC2	0	-0.22371	-0.496705	-0.502956
CCGTCCATGCAAAAACTACG	neStops	YER166W	DNF1	0	-0.0305487	-0.227943	-0.502945
ACACCTAACTGAGTGTACAT	eProvs	YER126C	NSA2	0	-0.091148	-0.310906	-0.502901
CCACCAGCAAAAGTATTTCT	neProvs	YBL058W	SHP1	0	-0.206063	-0.589332	-0.502868
TTACAAAGAGTGCACTTGAA	eProvs	YLR323C	CWC24	0	-0.156449	-0.200038	-0.502551
CTGTACCAGCGGAAACGGTG	eProvs	YOL034W	SMC5	0	-0.216452	-0.378198	-0.502461
CTCTCTCAACACGGCAACGG	neStops	YHR032W	ERC1	0	-0.326294	-0.569192	-0.5022
CTATCCCGACCAGTTTCCCT	neProvs	YIL064W	EFM4	0	-0.325462	-0.417829	-0.501876
TTCTACCCAGCTATCTCACA	neStops	YNR059W	MNT4	0	0.0554903	-0.159205	-0.501517
ATAGTACAGTATGGATTACT	neStops	YGR258C	RAD2	0	-0.0260183	0.196755	-0.501108
TGGAACCCACGTTCTGCGTT	neProvs	YJR104C	SOD1	0	-0.266822	-0.250089	-0.500536
CCTTACCAGCGAGTTTCAAG	eProvs	YOR353C	SOG2	0	-0.256724	-0.549742	-0.49993
GTTCACCCTGGTGAAATGGT	eProvs	YDL140C	RPO21	0	0.00997652	-0.171125	-0.499898
ATTGAACGAGGCAACCCAAT	neStops	YKL155C	RSM22	0	0.130721	0.0054545	-0.499766
CTTTACAAACAAAATCGCAG	eProvs	YHR019C	DED81	0	-0.043173	-0.389632	-0.499763
GTTCCACAGGGAAGACATTT	neStops	YHL036W	MUP3	0	0.106012	-0.156038	-0.499451
TGATACCAGGCATATCTGGA	eProvs	YOR341W	RPA190	0	-0.419166	-0.703232	-0.499137
CAGTTCTCAAGGAAGTGCTG	neStops	YHR161C	YAP1801	0	-0.306012	0.346358	-0.498968
CGGGTTTCCTGTCCTTATTA	neProvs	YOR183W	FYV12	0	-0.507189	-0.305606	-0.498697
CATACCTTTGGATTATCCAA	neProvs	YIL161W	YIL161W	0	-0.323411	-0.336861	-0.498696
CCACCCAAAGGGATTTAAAA	neStops	YDR431W	YDR431W	0	-0.967515	-0.91322	-0.498693
TATCTTATCGTTTCACAATG	eProvs	YBR123C	TFC1	0	-0.0942836	-0.273412	-0.498572
GGAGATTCCACTGCAAAAGC	neProvs	YBR293W	VBA2	0	-0.0791545	-0.201517	-0.498129
ACAACGAATACTTTATTTAT	neStops	YFL025C	BST1	0	-0.199452	-0.443823	-0.497519
GCAACGTCGTGAAGAAGGAA	neProvs	YMR201C	RAD14	0	-0.191473	-0.325698	-0.497498
TGCACAATCAAATGATAAAC	neStops	YJR036C	HUL4	0	0.147133	-0.289362	-0.497427
ACATTTCCAAGTGGCGGAAA	neStops	YOR014W	RTS1	0	-0.0829628	-0.287284	-0.496889
GTAACCAATCGTTTACTCCC	neStops	YNL257C	SIP3	0	-0.424349	-0.646294	-0.496505
GCCACCATCTCTTTGATCTA	neStops	YGL255W	ZRT1	0	0.112157	0.204006	-0.496384
ACACACCTACTACCACGCCA	neProvs	YHR114W	BZZ1	0	-0.175737	-0.200197	-0.496201
ATTTACCATCACGACCAATA	eProvs	YOR151C	RPB2	0	0.0443035	-0.207335	-0.495295
AAACTAAAAAAGAAGCTTGT	eProvs	YNL189W	SRP1	0	-0.0326488	0.0770532	-0.494968
ATGTCTTTCTTAGGTTTCGG	eProvs	YHR005C-A	TIM10	0	-0.21685	-0.386497	-0.494769
GAAACCTGTTTGGCCTCCCT	eProvs	YHR019C	DED81	0	-0.0489919	-0.575076	-0.494641
ATTTCCTTCAAAAATCCAAG	neProvs	YFL023W	BUD27	0	0.0217179	-0.32071	-0.494515
TTTCCGGCATTCAAAAAAAT	neProvs	YGL185C	YGL185C	0	-0.114575	-0.592705	-0.49341
ATTGATACGAAAAGAAAGGA	neStops	YDR065W	RRG1	0	-0.502363	-0.571593	-0.49285
TTCCTGGTAGAAAAATGTTG	eProvs	YDR170C	SEC7	0	-0.00735937	-0.561746	-0.49277
CCTACCATCGATCATATCAC	eProvs	YGL040C	HEM2	0	0.169249	-0.312643	-0.491799
ACTCCCAGTGATATGGCACA	eProvs	YBR247C	ENP1	0	-0.243118	-0.554857	-0.491362
TTAACTTCAAACGATTGTGA	neProvs	YCR024C	SLM5	0	-0.111501	-0.209409	-0.49125
ATTCAAAAACTGTCATCTCA	neStops	YDL112W	TRM3	0	-0.0308874	-0.107234	-0.491175
TATGCCTCTCACTGATTTCA	neProvs	YMR097C	MTG1	0	-0.273203	-0.41109	-0.490945
GTCCCCAACGATGACAAATA	eProvs	YNL132W	KRE33	0	-0.317948	-0.321384	-0.490832
TACCAAACTTCACTAATATA	neStops	YBR112C	CYC8	0	-0.0914781	-0.0235561	-0.490381
GTTCCCTGCAAGATCTTCTG	eProvs	YLR212C	TUB4	0	0.0211903	-0.284892	-0.4892
ATGCATCTCGCGTGGCATGG	neProvs	YKL198C	PTK1	0	-0.0838702	-0.783815	-0.489198
TTCCTACCAAATCATCCAGG	neProvs	YML054C	CYB2	0	-0.321054	-0.0240167	-0.489128
TCTCTTTCTTACAAAGATTC	neProvs	YBL045C	COR1	0	-0.185635	-0.399406	-0.488778
ACTCCCTAACGTGGCATTAG	eProvs	YDR211W	GCD6	0	-0.0323316	-0.0622658	-0.488478
ATAGAGCAAGTGGCCTTCAA	neStops	YDR061W	YDR061W	0	-0.258861	-0.410445	-0.488438
GCACACCCAACAACAACATT	neProvs	YNR002C	ATO2	0	-0.246334	-0.24543	-0.487892
GAACCCTTGGTAATAATCAT	eProvs	YER171W	RAD3	0	-0.83574	-0.898182	-0.48777
GGGACTTATAGGGAAGATAT	neProvs	YML032C	RAD52	0	-0.486991	-0.618173	-0.487744
CACACCAAAGGAAACCAAGT	neProvs	YER026C	CHO1	0	-0.658921	-0.950346	-0.487719
TGTTAACCAATCTCTTTCCC	neStops	YLR256W	HAP1	0	-0.224919	-0.0737257	-0.487702
ACTCCTGCTTTAAGAGCTGT	eProvs	YNL189W	SRP1	0	-0.148058	-0.371693	-0.487301
ATCATACCAGAAAAAGAAGT	eProvs	YGR216C	GPI1	0	-0.252741	-0.387164	-0.486876
GGTACCGATGTAATGAGCCA	eProvs	YGL055W	OLE1	0	-0.12282	-0.638009	-0.486796
TTGTCAATCAACCTTGCCTA	neStops	YNL073W	MSK1	0	0.0306033	0.0024054	-0.486746
AACACAGGCAGTGCAAGATG	neStops	YNR006W	VPS27	0	-0.441285	-0.0500284	-0.486593
AATATTCAAGACTCTCAAAG	neStops	YIL140W	AXL2	0	0.0487844	-0.448403	-0.486587
TAACCAAAAACACTTTCTAA	eProvs	YBR038W	CHS2	0	0.0645359	-0.21945	-0.486244
AAATACCATAGTCTTTCGCT	neProvs	YFR015C	GSY1	0	-0.0564547	-0.507952	-0.486207
TACCCCCTTCAACATAGGTT	neProvs	YIL123W	SIM1	0	-0.113808	-0.272574	-0.486134
CAACCCTCTGTGGACATCAC	eProvs	YNR003C	RPC34	0	-0.139803	-0.185216	-0.486067
CAAGAATCGTATTATTGTGG	eProvs	YOR207C	RET1	0	0.0380949	-0.373173	-0.485967
AATGGACCTGCAGTACCTAA	eProvs	YDL055C	PSA1	0	-0.317166	-1.04518	-0.485834
AGACCAAGACGAGGAGTTGG	neStops	YKR048C	NAP1	0	-0.101481	-0.441001	-0.485673
AATACCTGTGGTAGTGCCTT	eProvs	YDR487C	RIB3	0	0.0142059	-0.412866	-0.485632
GGACCAAGTCAAACCGAGAT	neStops	YDR004W	RAD57	0	0.437924	-0.329562	-0.485552
ACCCAAGCGCAGCAAGCAAG	neStops	YDR213W	UPC2	0	-0.0265458	-0.313328	-0.485512
CTTCCCTAAAATAAATCCGA	neProvs	YKR090W	PXL1	0	-0.176541	-0.204151	-0.485512
TAGACAAGGGCTCAATTTAG	neStops	YPL084W	BRO1	0	0.115283	-0.459625	-0.485145
TCTCTCACCTAAGGAGAAAT	neProvs	YGR281W	YOR1	0	-0.234639	-0.251946	-0.485071
ACATTTACAGAGACTAATCA	neStops	YLL006W	MMM1	0	-0.217401	-0.207536	-0.484663
GTTACTTCAACATAAAAAGA	neStops	YMR285C	NGL2	0	-0.0534024	-0.261762	-0.484473
CATACTAGATGGGCTACTCA	eProvs	YKL104C	GFA1	0	-0.0565738	-0.407926	-0.484357
CAACTGCAGCAACTACAACC	neStops	YDR359C	EAF1	0	-0.260043	0.0287329	-0.484112
TTTGACCCTCAATATGTAAA	eProvs	YNL247W	YNL247W	0	-0.189418	-0.460477	-0.483992
GCTGCCCCTGAAGTCTTAGG	neProvs	YAL017W	PSK1	0	-0.313352	-0.494363	-0.483973
ACACCACGTCATTCCACCCG	neStops	YPR138C	MEP3	0	-0.450701	-0.409693	-0.4836
GCTTCCCCAGGAATTCTAAT	eProvs	YMR227C	TAF7	0	-0.499004	-0.643238	-0.483577
AGTTTCCATCAGGAATCAAA	eProvs	YER009W	NTF2	0	-0.157328	-0.459803	-0.483492
ATGCAGAGAGTTGAACAAGC	neStops	YDL006W	PTC1	0	0.264864	-0.0479135	-0.483129
TGCCAAGAAAAAGAGCAACC	neStops	YDL090C	RAM1	0	0.399698	-0.0790235	-0.483087
AAAACCCTACACGTTAATCG	eProvs	YMR277W	FCP1	0	-0.025765	-0.207113	-0.482823
AATGAATCCAACCACAATAC	neProvs	YMR231W	PEP5	0	-0.268675	-0.494215	-0.482528
[truncated: 14,453 more rows]

## Sheet: genes
geneSys	gene	essential	TpreGal_log2fc	T00h_log2fc	T08h_log2fc	T24h_log2fc
YPL028W	ERG10	TRUE	0	-1.16967	-3.9298	-3.62634
YLR249W	YEF3	TRUE	0	-2.09482	-3.28682	-3.60977
YGR094W	VAS1	TRUE	0	-1.71397	-3.10925	-3.48039
YDL102W	POL3	TRUE	0	-1.60926	-4.32485	-3.38892
YOR151C	RPB2	TRUE	0	-2.87484	-3.68569	-3.38395
YJL034W	KAR2	TRUE	0	-3.51279	-5.31496	-3.23872
YOR341W	RPA190	TRUE	0	-1.90694	-4.13199	-3.07817
YIL031W	ULP2	TRUE	0	-0.890909	-2.44732	-3.04918
YKR001C	VPS1	FALSE	0	-1.41538	-1.86558	-3.04172
YGL245W	GUS1	TRUE	0	-2.52116	-3.79551	-3.02787
YIL003W	CFD1	TRUE	0	-0.118425	-1.358	-3.01581
YHR083W	SAM35	TRUE	0	0.533741	-0.838622	-2.96077
YLR115W	CFT2	TRUE	0	-1.9632	-3.71564	-2.93788
YOR048C	RAT1	TRUE	0	-2.00841	-3.7362	-2.91631
YGL022W	STT3	TRUE	0	-1.84927	-3.06625	-2.91556
YBL030C	PET9	TRUE	0	-1.01899	-1.31263	-2.91328
YNL048W	ALG11	FALSE	0	-1.48613	-3.12427	-2.89325
YBL076C	ILS1	TRUE	0	-1.80165	-4.22862	-2.8897
YGL225W	VRG4	TRUE	0	-1.29449	-3.14158	-2.88128
YGL148W	ARO2	FALSE	0	-0.662744	-2.59369	-2.83223
YHR070W	TRM5	TRUE	0	0.339222	-1.16659	-2.82339
YPL231W	FAS2	TRUE	0	-2.08404	-3.50604	-2.80751
YBL071W-A	KTI11	FALSE	0	-1.46809	-1.61862	-2.79517
YER023W	PRO3	TRUE	0	-0.379785	-1.60318	-2.77415
YDL143W	CCT4	TRUE	0	-3.61811	-4.13811	-2.76546
YPL175W	SPT14	TRUE	0	-1.02044	-2.35991	-2.74313
YOL097C	WRS1	TRUE	0	-1.70635	-3.04386	-2.73623
YJL167W	ERG20	TRUE	0	-0.306493	-2.35388	-2.73345
YKL182W	FAS1	TRUE	0	-2.85	-3.75419	-2.72755
YCR066W	RAD18	FALSE	0	-0.474881	-1.46313	-2.70877
YBR038W	CHS2	TRUE	0	-3.43158	-4.62223	-2.70727
YGL008C	PMA1	TRUE	0	-3.45998	-4.40996	-2.68377
YGR029W	ERV1	TRUE	0	-0.443827	-0.36442	-2.68049
YDL212W	SHR3	TRUE	0	-0.602557	-1.60183	-2.68
YLR014C	PPR1	FALSE	0	-1.58043	-2.48817	-2.6628
YOR168W	GLN4	TRUE	0	-2.12924	-3.64322	-2.64936
YLR229C	CDC42	TRUE	0	-2.92983	-3.61722	-2.64241
YDL008W	APC11	TRUE	0	-0.99828	-3.25028	-2.6399
YJR016C	ILV3	TRUE	0	-1.45119	-2.92812	-2.63244
YGL173C	XRN1	FALSE	0	-0.914735	-1.49865	-2.62036
YNL181W	PBR1	TRUE	0	-1.34828	-2.48914	-2.58504
YLR397C	AFG2	TRUE	0	-1.30743	-2.77487	-2.56633
YDR243C	PRP28	TRUE	0	0.35307	-2.17554	-2.54918
YPR142C	YPR142C	TRUE	0	-1.58003	-2.62148	-2.53763
YDR362C	TFC6	TRUE	0	-0.31631	-1.81153	-2.53039
YDR232W	HEM1	TRUE	0	0.440414	-0.788189	-2.52478
YHR019C	DED81	TRUE	0	-2.40879	-3.76356	-2.5226
YHR099W	TRA1	FALSE	0	-1.13086	-2.43875	-2.52242
YDR023W	SES1	TRUE	0	-1.82174	-3.5043	-2.49601
YPR035W	GLN1	TRUE	0	-2.43084	-3.74831	-2.48858
YGR156W	PTI1	TRUE	0	-0.989032	-2.15758	-2.48739
YLR045C	STU2	TRUE	0	-1.23851	-2.35846	-2.48197
YPL235W	RVB2	TRUE	0	-2.34281	-3.76424	-2.46025
YGR083C	GCD2	TRUE	0	-1.76003	-2.82996	-2.45355
YGL169W	SUA5	TRUE	0	-0.563636	-1.48534	-2.44286
YJR006W	POL31	TRUE	0	-1.25635	-2.15999	-2.44199
YGL047W	ALG13	TRUE	0	-0.197753	-0.500947	-2.43936
YKL054C	DEF1	FALSE	0	-1.51163	-2.15066	-2.43808
YGL055W	OLE1	TRUE	0	-1.54673	-2.35438	-2.43361
YDL140C	RPO21	TRUE	0	-2.67142	-3.94151	-2.41728
YNL221C	POP1	TRUE	0	0.359895	-1.42283	-2.41191
YNL102W	POL1	TRUE	0	-3.08875	-4.60819	-2.41097
YPR010C	RPA135	TRUE	0	-1.48292	-3.1526	-2.40928
YBR256C	RIB5	TRUE	0	-0.373406	-0.592308	-2.40747
YER107C	GLE2	FALSE	0	-0.524701	-1.55985	-2.40662
YKL181W	PRS1	FALSE	0	-0.282037	-1.22465	-2.40649
YML125C	PGA3	TRUE	0	-1.39757	-2.81433	-2.40579
YGL038C	OCH1	FALSE	0	-0.42274	-1.28771	-2.40242
YJL019W	MPS3	TRUE	0	-1.3658	-4.3305	-2.39768
YJL111W	CCT7	TRUE	0	-1.8943	-3.31562	-2.39156
YCL017C	NFS1	TRUE	0	-0.626461	-1.94587	-2.38487
YJL014W	CCT3	TRUE	0	-3.59436	-3.20651	-2.3517
YDR021W	FAL1	TRUE	0	-0.537011	-2.16839	-2.34986
YOR116C	RPO31	TRUE	0	-2.18632	-3.72898	-2.34487
YMR220W	ERG8	TRUE	0	-0.453684	-2.1502	-2.3279
YER136W	GDI1	TRUE	0	-0.356354	-1.90659	-2.32567
YMR131C	RRB1	TRUE	0	-1.02928	-1.62966	-2.32196
YLR195C	NMT1	TRUE	0	-0.563262	-2.34834	-2.31728
YNR038W	DBP6	TRUE	0	-0.885163	-2.46458	-2.31516
YDR339C	FCF1	TRUE	0	-2.21518	-3.70999	-2.31271
YCL043C	PDI1	TRUE	0	-0.558723	-1.63499	-2.30288
YKR024C	DBP7	FALSE	0	-0.657056	-1.24673	-2.2954
YHR072W	ERG7	TRUE	0	-0.553494	-2.21239	-2.28366
YNL256W	FOL1	TRUE	0	0.321704	-0.691672	-2.28282
YHR020W	YHR020W	TRUE	0	-1.45208	-2.90549	-2.27923
YOR057W	SGT1	TRUE	0	-0.667411	-1.50445	-2.27861
YNL247W	YNL247W	TRUE	0	-1.18675	-2.3959	-2.27733
YDR082W	STN1	TRUE	0	-0.670081	-2.00168	-2.27504
YER133W	GLC7	TRUE	0	-1.68058	-2.99108	-2.26157
YLR342W	FKS1	FALSE	0	-1.77909	-2.45905	-2.24875
YDL029W	ARP2	TRUE	0	-1.76362	-2.34357	-2.24323
YBL093C	ROX3	FALSE	0	-0.533196	-1.54013	-2.24297
YPL193W	RSA1	FALSE	0	-0.219296	-0.856922	-2.23864
YLR355C	ILV5	TRUE	0	-1.72438	-3.36415	-2.23585
YOR089C	VPS21	FALSE	0	-2.03651	-3.06882	-2.23241
YBR243C	ALG7	TRUE	0	-1.11805	-2.23873	-2.2322
YNL220W	ADE12	FALSE	0	-1.06101	-2.5365	-2.22907
YGL097W	SRM1	TRUE	0	-2.38892	-3.14374	-2.22777
YER070W	RNR1	FALSE	0	-3.07134	-4.66167	-2.22731
YKL035W	UGP1	TRUE	0	-0.725259	-2.27663	-2.22425
YMR185W	RTP1	FALSE	0	-0.560774	-1.61345	-2.20965
YDL126C	CDC48	TRUE	0	-1.99194	-3.14294	-2.20956
YNR016C	ACC1	TRUE	0	-2.2065	-3.19359	-2.20373
YER094C	PUP3	TRUE	0	-2.05365	-2.30635	-2.19767
YOR207C	RET1	TRUE	0	-1.46699	-2.47735	-2.19169
YKL210W	UBA1	TRUE	0	-0.813764	-2.16645	-2.19063
YGR191W	HIP1	TRUE	0	-2.83755	-2.88801	-2.18488
YAL021C	CCR4	FALSE	0	-0.830813	-1.20502	-2.16887
YLL031C	GPI13	TRUE	0	-1.11833	-2.67605	-2.16326
YPR085C	ASA1	TRUE	0	0.198949	-0.950062	-2.15669
YOL072W	THP1	FALSE	0	-1.05387	-2.16596	-2.15634
YBR196C	PGI1	TRUE	0	-1.27135	-3.08101	-2.1438
YHR188C	GPI16	TRUE	0	-1.22851	-2.5857	-2.1383
YPL043W	NOP4	TRUE	0	-0.820221	-1.59879	-2.13209
YLL034C	RIX7	TRUE	0	-0.50007	-1.8122	-2.12857
YLR304C	ACO1	FALSE	0	-1.45603	-1.83749	-2.12783
YJL050W	MTR4	TRUE	0	-1.41012	-2.77447	-2.11316
YLR277C	YSH1	TRUE	0	-1.74604	-3.2365	-2.1116
YBR019C	GAL10	FALSE	0	-3.31447	-3.21467	-2.11068
YBL027W	RPL19B	FALSE	0	-2.46749	-2.83487	-2.10621
YNL139C	THO2	FALSE	0	-0.562307	-1.44912	-2.10582
YIL142W	CCT2	TRUE	0	-1.7679	-2.41661	-2.1056
YFL039C	ACT1	TRUE	0	-3.71398	-3.48405	-2.10027
YOL130W	ALR1	TRUE	0	-1.1947	-2.4146	-2.09868
YLR382C	NAM2	FALSE	0	-0.81083	-0.921539	-2.095
YIL143C	SSL2	TRUE	0	-1.87801	-2.92753	-2.09353
YBR136W	MEC1	TRUE	0	-0.454442	-0.86762	-2.09235
YER036C	ARB1	TRUE	0	-0.495572	-1.44389	-2.08977
YDR081C	PDC2	TRUE	0	-0.117451	-0.438663	-2.08557
YHR007C	ERG11	TRUE	0	-1.33601	-2.16199	-2.08256
YMR296C	LCB1	TRUE	0	-1.07212	-2.62773	-2.08047
YDR069C	DOA4	FALSE	0	-0.981407	-1.91207	-2.07769
YER043C	SAH1	TRUE	0	-1.05294	-1.79746	-2.07269
YBR029C	CDS1	TRUE	0	-1.76409	-3.66313	-2.072
YOR096W	RPS7A	FALSE	0	-1.00368	-1.17802	-2.07098
YBR049C	REB1	TRUE	0	0.232064	-0.685352	-2.06802
YLR086W	SMC4	TRUE	0	-1.64867	-2.53625	-2.06478
YDR531W	CAB1	TRUE	0	-0.542485	-1.992	-2.06385
YAL041W	CDC24	TRUE	0	-1.69389	-2.35907	-2.05744
YAL024C	LTE1	FALSE	0	-0.413906	-1.82576	-2.05563
YLR212C	TUB4	TRUE	0	-1.9692	-4.16504	-2.04924
YJL005W	CYR1	TRUE	0	-1.22354	-1.97431	-2.04891
YPR176C	BET2	TRUE	0	-0.698767	-2.4901	-2.04596
YJL008C	CCT8	TRUE	0	-1.52538	-1.54049	-2.04574
YKL078W	DHR2	TRUE	0	-1.04679	-2.47781	-2.04329
YLR276C	DBP9	TRUE	0	-0.895401	-1.51855	-2.04241
YJL127C	SPT10	FALSE	0	-0.0751481	-1.29984	-2.0421
YML013W	UBX2	FALSE	0	-0.351851	-1.30627	-2.03809
YPR181C	SEC23	TRUE	0	-2.63555	-2.65704	-2.03686
YDL205C	HEM3	TRUE	0	0.383206	-0.580196	-2.03391
YEL058W	PCM1	TRUE	0	0.195902	-1.94132	-2.0337
YDL047W	SIT4	FALSE	0	-1.27706	-1.55952	-2.03119
YLL008W	DRS1	TRUE	0	-0.94353	-1.86821	-2.03045
YDR182W	CDC1	TRUE	0	-0.7876	-1.89149	-2.02929
YJR090C	GRR1	FALSE	0	-0.910578	-1.57217	-2.02271
YPL160W	CDC60	TRUE	0	-1.57363	-2.78424	-2.02081
YGR271C-A	EFG1	FALSE	0	-0.563954	-1.26571	-2.01974
YPL153C	RAD53	TRUE	0	-0.452397	-0.992932	-2.01915
YAL038W	CDC19	TRUE	0	-0.950515	-2.33668	-2.01889
YFL005W	SEC4	TRUE	0	-0.968603	-1.56545	-2.0087
YAR007C	RFA1	TRUE	0	-0.530429	-1.74534	-2.00625
YGL163C	RAD54	FALSE	0	-0.98748	-1.82381	-2.00249
YMR108W	ILV2	TRUE	0	-0.648229	-2.26992	-2.00209
YDR341C	YDR341C	TRUE	0	-0.813406	-2.72177	-2.00166
YDL055C	PSA1	TRUE	0	-0.811793	-1.79993	-1.99933
YPR178W	PRP4	TRUE	0	0.491707	-1.33377	-1.99908
YMR224C	MRE11	FALSE	0	0.162141	-0.534359	-1.99673
YEL019C	MMS21	TRUE	0	0.193721	-1.0112	-1.99661
YOL010W	RCL1	TRUE	0	-0.691329	-2.12505	-1.99331
YLR320W	MMS22	FALSE	0	-0.567441	-1.32486	-1.98482
YIL126W	STH1	TRUE	0	-1.17168	-2.34228	-1.98278
YMR200W	ROT1	TRUE	0	-2.2345	-2.89602	-1.98222
YOR074C	CDC21	TRUE	0	-0.665951	-2.21471	-1.97959
YGL155W	CDC43	TRUE	0	0.0461962	-1.15717	-1.97915
YHR164C	DNA2	TRUE	0	-0.702898	-2.613	-1.96785
YMR060C	SAM37	FALSE	0	-0.111697	-0.0712105	-1.96669
YPR025C	CCL1	TRUE	0	-1.62524	-2.80792	-1.96488
YGR167W	CLC1	FALSE	0	-1.51004	-2.97548	-1.96178
YDR303C	RSC3	TRUE	0	-0.643115	-1.63155	-1.96026
YPR016C	TIF6	TRUE	0	-0.949931	-1.94431	-1.94965
YMR113W	FOL3	TRUE	0	-0.330678	0.532918	-1.94898
YIL078W	THS1	TRUE	0	-1.51619	-2.77678	-1.94758
YKL126W	YPK1	FALSE	0	-0.303033	-1.1844	-1.94483
YDR172W	SUP35	TRUE	0	-1.82645	-2.54146	-1.94348
YGR252W	GCN5	FALSE	0	-0.793145	-1.51088	-1.94257
YMR301C	ATM1	TRUE	0	0.330079	0.671731	-1.92658
YGR098C	ESP1	TRUE	0	-2.24451	-3.11637	-1.92601
YBR237W	PRP5	TRUE	0	0.37285	-1.90815	-1.91992
YBL097W	BRN1	TRUE	0	-1.8353	-2.96349	-1.91719
YLR316C	TAD3	TRUE	0	-0.129249	-1.08182	-1.90951
YDR331W	GPI8	TRUE	0	-1.16699	-2.39609	-1.90789
YLR359W	ADE13	TRUE	0	-0.815515	-1.26985	-1.9072
YOR322C	LDB19	FALSE	0	0.414855	-0.874351	-1.90648
YJL087C	TRL1	TRUE	0	-0.737899	-1.42576	-1.90388
YLR182W	SWI6	FALSE	0	-1.4318	-1.43092	-1.90204
YBR036C	CSG2	FALSE	0	-2.38491	-3.15255	-1.90093
YDR062W	LCB2	TRUE	0	-0.97847	-2.3544	-1.89982
YDR264C	AKR1	FALSE	0	-0.964637	-0.823809	-1.89463
YNL248C	RPA49	FALSE	0	-0.891284	-1.53867	-1.88696
YGL171W	ROK1	TRUE	0	-0.482162	-1.39133	-1.88603
YDL108W	KIN28	TRUE	0	-1.15846	-1.70692	-1.88555
YGR175C	ERG1	TRUE	0	-1.34668	-1.79687	-1.88476
YDL208W	NHP2	TRUE	0	-0.758823	-1.56094	-1.8845
YBL014C	RRN6	TRUE	0	-0.690458	-1.6327	-1.87896
YML031C-A	YML031C-A	FALSE	0	-3.033	-3.0012	-1.87512
YJL033W	HCA4	TRUE	0	-0.912556	-2.07292	-1.86239
YGL106W	MLC1	FALSE	0	-2.44746	-3.78488	-1.85594
YCL061C	MRC1	FALSE	0	-1.00058	-1.74491	-1.85519
YDR190C	RVB1	TRUE	0	-0.978668	-2.16967	-1.85413
YER003C	PMI40	TRUE	0	0.231742	-1.68314	-1.85385
YFL022C	FRS2	TRUE	0	-1.45433	-1.86792	-1.84844
YFR050C	PRE4	TRUE	0	-1.726	-2.2818	-1.84699
YNL280C	ERG24	FALSE	0	-0.676784	-1.68182	-1.83681
YBR265W	TSC10	TRUE	0	-0.469344	-1.50966	-1.83676
YMR128W	ECM16	TRUE	0	-0.551199	-2.01078	-1.83613
YEL036C	ANP1	FALSE	0	-1.00931	-1.57101	-1.83497
YCR094W	CDC50	FALSE	0	-0.448949	-1.73754	-1.83184
YPR048W	TAH18	TRUE	0	-0.286584	-1.21857	-1.82391
YJL081C	ARP4	TRUE	0	-0.820748	-1.86398	-1.82262
YIL083C	CAB2	TRUE	0	-0.0770974	-0.952871	-1.81668
YHR024C	MAS2	TRUE	0	-0.651807	-1.6366	-1.81586
YAR019C	CDC15	TRUE	0	-1.05072	-1.65754	-1.81586
YOR141C	ARP8	FALSE	0	0.146567	-0.563279	-1.81081
YPR159W	KRE6	FALSE	0	-2.59492	-3.07724	-1.80925
YBL035C	POL12	TRUE	0	-0.385456	-1.26044	-1.8083
YMR202W	ERG2	FALSE	0	0.172746	-0.248865	-1.80295
YMR217W	GUA1	FALSE	0	-1.35502	-2.38124	-1.79707
YMR125W	STO1	FALSE	0	-0.404993	-0.784145	-1.7939
YPL040C	ISM1	FALSE	0	-0.544501	-0.645092	-1.7849
YOR335C	ALA1	TRUE	0	-1.09003	-2.47558	-1.78154
YHR005C	GPA1	FALSE	0	-3.1675	-2.64287	-1.78078
YOR046C	DBP5	TRUE	0	-1.36621	-2.47303	-1.77516
YNL290W	RFC3	TRUE	0	-0.578545	-1.69625	-1.7739
YDR484W	VPS52	FALSE	0	-1.07905	-2.26148	-1.77201
YLR420W	URA4	FALSE	0	-0.449242	-1.75604	-1.77159
YNL189W	SRP1	TRUE	0	-1.61954	-2.12333	-1.76984
YNL192W	CHS1	FALSE	0	-0.765908	-1.54735	-1.75972
YNL112W	DBP2	TRUE	0	-0.735743	-0.821202	-1.75781
YKL139W	CTK1	FALSE	0	0.197587	-0.586578	-1.75731
YCL059C	KRR1	TRUE	0	-0.891769	-1.87969	-1.75566
YJR105W	ADO1	FALSE	0	0.255479	-0.619436	-1.75297
YBR084C-A	RPL19A	FALSE	0	-1.50837	-1.99998	-1.75046
YDR047W	HEM12	TRUE	0	0.375235	-0.650414	-1.74654
YGL142C	GPI10	TRUE	0	-0.634066	-0.680177	-1.74536
YBL016W	FUS3	FALSE	0	-0.616582	-0.930482	-1.74332
YMR146C	TIF34	TRUE	0	-1.43117	-2.55124	-1.74148
YJL091C	GWT1	TRUE	0	-0.429349	-0.859934	-1.73981
YDL103C	QRI1	TRUE	0	-0.352617	-1.25165	-1.73725
YDL028C	MPS1	TRUE	0	-1.40767	-1.79616	-1.73709
YDR159W	SAC3	FALSE	0	-1.11788	-1.66636	-1.73587
YLR357W	RSC2	FALSE	0	-0.338125	-0.96233	-1.73524
YLR259C	HSP60	TRUE	0	0.406434	-0.690633	-1.73321
YGR188C	BUB1	FALSE	0	0.388564	0.598412	-1.72934
YJL035C	TAD2	TRUE	0	0.0707125	-0.0725563	-1.72917
YGL120C	PRP43	TRUE	0	-0.205376	-1.30255	-1.72483
YJL130C	URA2	FALSE	0	-0.886762	-1.79757	-1.71719
YPR086W	SUA7	TRUE	0	-0.631286	-1.10653	-1.71621
YOR204W	DED1	TRUE	0	-1.92212	-3.1302	-1.70703
YHR027C	RPN1	FALSE	0	-1.52896	-3.0138	-1.69436
YHR074W	QNS1	TRUE	0	0.46951	0.68503	-1.69085
YDR454C	GUK1	TRUE	0	-0.323342	-1.13846	-1.69027
YOR063W	RPL3	TRUE	0	-1.6285	-2.8252	-1.68775
YBR156C	SLI15	FALSE	0	-1.15511	-2.45303	-1.68343
YGR104C	SRB5	FALSE	0	-0.951556	-1.31338	-1.68197
YOL143C	RIB4	FALSE	0	0.0905614	-1.0843	-1.68137
YMR013C	SEC59	TRUE	0	-0.260913	-1.95718	-1.67661
YNR017W	TIM23	TRUE	0	-0.894584	-1.41764	-1.67289
YLR148W	PEP3	FALSE	0	-0.45255	-1.34198	-1.66767
YBL033C	RIB1	FALSE	0	-0.57871	-3.0724	-1.66512
YIL048W	NEO1	TRUE	0	-1.12475	-2.52177	-1.65674
YPL266W	DIM1	TRUE	0	-0.469111	-1.3702	-1.65245
YLR347C	KAP95	TRUE	0	-1.43572	-2.61963	-1.64411
YGR060W	ERG25	TRUE	0	-2.23815	-2.75414	-1.64279
YNL262W	POL2	TRUE	0	-0.953137	-2.1476	-1.63842
YOL034W	SMC5	TRUE	0	0.528344	-0.8947	-1.63725
YAL035W	FUN12	FALSE	0	-0.45573	-1.58599	-1.63661
YER125W	RSP5	TRUE	0	-1.75738	-2.02032	-1.63658
YLL011W	SOF1	TRUE	0	-0.80859	-2.46882	-1.62922
YJL006C	CTK2	FALSE	0	-0.147761	0.306929	-1.62449
YML043C	RRN11	TRUE	0	-0.639637	-1.01974	-1.61907
YHR165C	PRP8	TRUE	0	-0.493282	-1.74351	-1.61614
YOR262W	GPN2	TRUE	0	-0.226589	-1.15568	-1.61118
YLR153C	ACS2	TRUE	0	-1.41636	-2.98926	-1.60849
YPL190C	NAB3	TRUE	0	-0.440917	-0.822565	-1.60607
YDR044W	HEM13	TRUE	0	0.277165	-0.310065	-1.60496
YHR191C	CTF8	FALSE	0	-0.409798	-1.27444	-1.60409
YJL125C	GCD14	TRUE	0	0.152083	-0.472259	-1.60176
YHR102W	KIC1	TRUE	0	0.476722	-1.29552	-1.59501
YLR373C	VID22	FALSE	0	0.0607619	-0.313981	-1.59305
YAL047C	SPC72	FALSE	0	-0.23477	-0.830507	-1.59144
YBR070C	ALG14	TRUE	0	-0.366723	-1.40288	-1.58915
YNL273W	TOF1	FALSE	0	-0.537723	-1.28058	-1.58807
YPR041W	TIF5	TRUE	0	-1.0468	-1.45888	-1.58663
YGL150C	INO80	TRUE	0	0.309533	-0.481518	-1.58591
YNL135C	FPR1	FALSE	0	-0.700652	-1.24635	-1.58568
YDR335W	MSN5	FALSE	0	-0.84642	-1.13819	-1.58557
YGR265W	YGR265W	TRUE	0	-2.40084	-2.33177	-1.58441
YPR110C	RPC40	TRUE	0	-0.773316	-1.4378	-1.58105
YMR208W	ERG12	TRUE	0	-0.365336	-1.16916	-1.58076
YDL164C	CDC9	TRUE	0	-0.641284	-1.37878	-1.57868
YGR274C	TAF1	TRUE	0	-0.423552	-0.803642	-1.57834
YKL104C	GFA1	TRUE	0	-0.755482	-2.10514	-1.57586
YPL268W	PLC1	FALSE	0	-1.17903	-1.39663	-1.57172
YPR074C	TKL1	FALSE	0	-0.610619	-1.07259	-1.57164
YOR323C	PRO2	FALSE	0	-0.414271	-1.13075	-1.57095
YLR370C	ARC18	FALSE	0	-1.03785	-1.64316	-1.56915
YGR061C	ADE6	FALSE	0	-1.03619	-1.11683	-1.56624
YOL086C	ADH1	FALSE	0	-0.380701	-0.607705	-1.56424
YML008C	ERG6	FALSE	0	-0.725961	-0.986419	-1.56365
YMR059W	SEN15	TRUE	0	-0.310906	-1.33985	-1.55144
YPL209C	IPL1	TRUE	0	-0.987923	-2.28618	-1.55036
YNL240C	NAR1	TRUE	0	-0.463275	-0.949765	-1.54892
YGL116W	CDC20	TRUE	0	-2.30752	-2.31726	-1.54498
YLR244C	MAP1	FALSE	0	0.329242	-1.11196	-1.54458
YDR390C	UBA2	TRUE	0	0.16977	0.36558	-1.53958
YLR032W	RAD5	FALSE	0	-0.412632	-0.955732	-1.53895
YER111C	SWI4	FALSE	0	-1.08121	-1.01289	-1.53568
YHR065C	RRP3	TRUE	0	-1.81871	-2.49655	-1.5344
YLR007W	NSE1	TRUE	0	0.105404	-0.684125	-1.5321
YOR290C	SNF2	FALSE	0	-1.05834	-1.68567	-1.52807
YMR212C	EFR3	FALSE	0	0.294745	-0.706676	-1.52252
YOR241W	MET7	FALSE	0	0.272541	-0.342425	-1.51986
YBR126C	TPS1	FALSE	0	0.331605	-0.710265	-1.51265
YNL216W	RAP1	TRUE	0	-0.515172	-1.20139	-1.50833
YIR008C	PRI1	TRUE	0	-0.559436	-1.43561	-1.5042
YNL308C	KRI1	TRUE	0	-0.800057	-0.899062	-1.50404
YGR211W	ZPR1	TRUE	0	0.211484	-0.497884	-1.49647
YLR234W	TOP3	FALSE	0	-0.18576	-0.704429	-1.49571
YGL105W	ARC1	FALSE	0	0.27122	-0.627368	-1.48924
YDR127W	ARO1	FALSE	0	0.425312	-1.42462	-1.4847
YBR106W	PHO88	FALSE	0	-0.648353	-0.882848	-1.4814
YBR080C	SEC18	TRUE	0	-1.14663	-2.24438	-1.48117
YAL016W	TPD3	FALSE	0	-1.21712	-2.02602	-1.48003
YCL004W	PGS1	TRUE	0	-0.270491	0.459434	-1.47671
YGR091W	PRP31	TRUE	0	0.419206	0.572956	-1.47364
YDL111C	RRP42	TRUE	0	-1.24914	-1.75167	-1.47229
YGL066W	SGF73	FALSE	0	-0.964004	-0.81263	-1.46969
YPR133W-A	TOM5	FALSE	0	-0.315359	-0.675639	-1.46895
YFR004W	RPN11	TRUE	0	-1.19579	-1.49346	-1.4687
YER026C	CHO1	FALSE	0	-0.799592	-2.42064	-1.46826
YDR226W	ADK1	FALSE	0	-0.338809	-0.94178	-1.46639
YHR107C	CDC12	TRUE	0	-1.22155	-1.87125	-1.46077
YGR180C	RNR4	FALSE	0	-0.762687	-1.05118	-1.45892
YLR305C	STT4	TRUE	0	-1.01812	-1.00415	-1.45612
YKL152C	GPM1	TRUE	0	-0.479758	-1.80809	-1.45585
YDR487C	RIB3	TRUE	0	0.27157	-1.09014	-1.44652
YEL055C	POL5	TRUE	0	-0.601129	-1.39121	-1.446
YDR101C	ARX1	FALSE	0	-0.302439	-0.612209	-1.43167
YFL023W	BUD27	FALSE	0	-0.205536	-0.502518	-1.43119
YKL216W	URA1	FALSE	0	-1.81066	-2.42238	-1.43045
YCR044C	PER1	FALSE	0	-0.0316461	-0.553125	-1.42918
YPR033C	HTS1	TRUE	0	-0.496889	-1.49444	-1.42812
YHR111W	UBA4	FALSE	0	0.38308	-0.363313	-1.42316
YAL001C	TFC3	TRUE	0	-0.240687	-0.424584	-1.41487
YLR196W	PWP1	TRUE	0	-0.412204	-1.05091	-1.40958
YBR170C	NPL4	FALSE	0	-0.168437	-1.37684	-1.40925
YKL045W	PRI2	TRUE	0	-1.17387	-2.26765	-1.40914
YBL058W	SHP1	FALSE	0	-0.206063	-0.792458	-1.40832
YNL076W	MKS1	FALSE	0	-0.433617	-0.951321	-1.40725
YJL129C	TRK1	FALSE	0	-0.950262	-1.92813	-1.40596
YHR073W	OSH3	FALSE	0	-0.42661	-1.17271	-1.40483
YOR211C	MGM1	FALSE	0	-0.673091	-0.693785	-1.3947
YML032C	RAD52	FALSE	0	-0.912418	-1.5544	-1.39434
YPL101W	ELP4	FALSE	0	-0.589714	-0.741504	-1.38787
YIL128W	MET18	FALSE	0	0.116259	0.305075	-1.38713
YNR046W	TRM112	TRUE	0	-0.606779	-1.23706	-1.38444
YGL016W	KAP122	FALSE	0	0.162867	-0.661066	-1.38083
YDR176W	NGG1	FALSE	0	-0.741852	-1.07612	-1.38031
YLR140W	YLR140W	TRUE	0	-0.975873	-1.56161	-1.37925
YOL038W	PRE6	TRUE	0	-0.802635	-1.14427	-1.37681
YHR011W	DIA4	FALSE	0	-0.477737	-0.500517	-1.37007
YLR417W	VPS36	FALSE	0	-0.258985	-0.675007	-1.36934
YDL077C	VAM6	FALSE	0	0.269384	0.654109	-1.36822
YKR042W	UTH1	FALSE	0	-0.316029	-1.59144	-1.36777
YDL145C	COP1	TRUE	0	-1.82322	-2.6794	-1.36696
YNL132W	KRE33	TRUE	0	-0.777236	-1.36695	-1.35641
YJR139C	HOM6	FALSE	0	0.122975	-0.477645	-1.35536
YDR160W	SSY1	TRUE	0	0.24117	-0.465735	-1.35397
YLL027W	ISA1	FALSE	0	-1.11693	-1.43267	-1.34684
YOR069W	VPS5	FALSE	0	-0.814909	-0.87999	-1.34654
YEL046C	GLY1	FALSE	0	-1.38965	-1.51527	-1.34566
YOR148C	SPP2	TRUE	0	-0.390374	-0.92753	-1.34434
YBR112C	CYC8	FALSE	0	0.344282	-1.30857	-1.33584
YDR240C	SNU56	TRUE	0	-0.588891	-1.17164	-1.33397
YGL129C	RSM23	FALSE	0	-0.512144	-0.334796	-1.33222
YPR112C	MRD1	TRUE	0	-0.534069	-1.15354	-1.33091
YFL037W	TUB2	TRUE	0	-1.83935	-3.9647	-1.33017
YDR353W	TRR1	TRUE	0	-0.384662	-0.726495	-1.32735
YGL040C	HEM2	TRUE	0	0.414866	-0.590191	-1.32539
YKL113C	RAD27	FALSE	0	-0.382232	-1.0187	-1.32512
YJL080C	SCP160	FALSE	0	-0.341607	0.419007	-1.32419
YDR188W	CCT6	TRUE	0	-1.25852	-1.8745	-1.31987
YDR037W	KRS1	TRUE	0	-1.12866	-2.29295	-1.31658
YCR042C	TAF2	FALSE	0	-0.600638	-1.34808	-1.3164
YJR049C	UTR1	FALSE	0	0.089357	-0.0771209	-1.31521
YPL117C	IDI1	TRUE	0	-0.239049	-0.600075	-1.31416
YKL165C	MCD4	TRUE	0	-0.988084	-1.35107	-1.30933
YFR019W	FAB1	FALSE	0	0.449102	0.547274	-1.30767
YCR072C	RSA4	TRUE	0	-0.405489	-1.13113	-1.30425
YGL207W	SPT16	TRUE	0	-0.90993	-1.07895	-1.30352
YHL025W	SNF6	FALSE	0	-0.816218	-1.49616	-1.30277
YGR264C	MES1	TRUE	0	-0.693165	-1.79533	-1.30084
YLR312W-A	MRPL15	FALSE	0	-0.614414	-0.68298	-1.29878
YNL088W	TOP2	TRUE	0	0.383648	-0.609353	-1.28874
YJL156C	SSY5	TRUE	0	-0.182526	-0.627135	-1.28645
YPR165W	RHO1	TRUE	0	-2.26051	-1.98171	-1.28557
YHR200W	RPN10	FALSE	0	-0.348645	-0.640003	-1.28245
YBR200W	BEM1	FALSE	0	-0.451021	-0.741475	-1.28166
YAR008W	SEN34	TRUE	0	0.160358	-0.398792	-1.27861
YLR369W	SSQ1	FALSE	0	0.283273	-0.424123	-1.27603
YNL061W	NOP2	TRUE	0	-0.47436	-0.546907	-1.27517
YDR004W	RAD57	FALSE	0	0.437924	-0.550273	-1.27428
YDR054C	CDC34	TRUE	0	-1.04108	-1.53301	-1.27222
YLR336C	SGD1	TRUE	0	-0.33918	-1.23343	-1.27051
YGL009C	LEU1	FALSE	0	-2.65714	-2.84833	-1.26944
YJL056C	ZAP1	FALSE	0	-0.573304	-1.47963	-1.26938
YKL138C	MRPL31	FALSE	0	-0.643896	-0.558885	-1.26921
YFR001W	LOC1	FALSE	0	-0.899611	-1.43672	-1.26589
YBR167C	POP7	TRUE	0	-0.243358	-1.39225	-1.26372
YFL001W	DEG1	FALSE	0	-0.45829	-0.529197	-1.2615
YER172C	BRR2	TRUE	0	0.246999	-0.768899	-1.26138
YLR430W	SEN1	TRUE	0	-0.670501	-0.848242	-1.258
YDL007W	RPT2	TRUE	0	-0.756385	-1.29251	-1.24878
YNL243W	SLA2	FALSE	0	-0.802454	-1.33473	-1.24827
YHR056C	RSC30	FALSE	0	-0.195426	-0.396465	-1.24505
YHR169W	DBP8	TRUE	0	-0.586959	-1.24603	-1.24148
YHR166C	CDC23	TRUE	0	-0.776236	-1.53824	-1.23761
YMR300C	ADE4	FALSE	0	-0.918086	-1.06391	-1.23514
YHL015W	RPS20	TRUE	0	-0.549785	-0.559364	-1.22963
YOR272W	YTM1	TRUE	0	-0.747082	-1.66252	-1.22732
YML035C	AMD1	FALSE	0	0.142287	-0.415923	-1.22712
YMR290C	HAS1	TRUE	0	-0.398709	-0.940118	-1.22394
YPL106C	SSE1	FALSE	0	-0.2003	-0.534247	-1.21999
YOL078W	AVO1	TRUE	0	-1.85898	-2.23929	-1.21604
YFR029W	PTR3	TRUE	0	-0.313217	-0.539055	-1.21441
YHR187W	IKI1	FALSE	0	-0.435645	-0.549069	-1.20995
YPR056W	TFB4	TRUE	0	-0.981526	-2.34759	-1.20943
YBR123C	TFC1	TRUE	0	-0.310021	-0.440157	-1.20936
YNL267W	PIK1	TRUE	0	0.345444	-1.25704	-1.2079
YLL035W	GRC3	TRUE	0	-0.252285	-1.54014	-1.20729
YKR082W	NUP133	FALSE	0	-0.3773	-0.950218	-1.20698
YEL013W	VAC8	FALSE	0	-0.322896	-0.482736	-1.20692
YLR432W	IMD3	FALSE	0	-0.0808723	-0.678348	-1.20354
YLR044C	PDC1	FALSE	0	-0.611345	-1.05605	-1.20133
YHR041C	SRB2	FALSE	0	-0.868682	-0.961749	-1.19692
YGR240C	PFK1	FALSE	0	0.229466	-0.461242	-1.19512
YBL079W	NUP170	FALSE	0	-0.535033	-0.946865	-1.19504
YJL069C	UTP18	TRUE	0	-0.597333	-0.786513	-1.18705
YBL071C-B	YBL071C-B	FALSE	0	-0.814953	-0.990572	-1.18592
YGL095C	VPS45	FALSE	0	-0.307139	-0.527653	-1.18539
YPR088C	SRP54	TRUE	0	-1.11848	-1.87169	-1.18539
YAL012W	CYS3	FALSE	0	-0.413994	-0.50351	-1.1848
YKR081C	RPF2	TRUE	0	-0.777805	-1.35536	-1.18468
YLR185W	RPL37A	FALSE	0	-0.942462	-1.41889	-1.18119
YGR270W	YTA7	FALSE	0	0.259796	0.497612	-1.18051
YPL020C	ULP1	TRUE	0	-0.463109	-0.844123	-1.17929
YPL042C	SSN3	FALSE	0	-0.445961	-0.326181	-1.17545
YPR173C	VPS4	FALSE	0	-0.536865	-0.888813	-1.17438
YDR300C	PRO1	FALSE	0	-0.252026	-0.564259	-1.1742
YOL021C	DIS3	TRUE	0	-0.484345	-1.2493	-1.16885
YGL234W	ADE5,7	FALSE	0	-1.03657	-1.31265	-1.16846
YDR123C	INO2	FALSE	0	-0.0896149	-0.304987	-1.16787
YAL025C	MAK16	TRUE	0	-0.480487	-0.394924	-1.16755
YKL101W	HSL1	FALSE	0	-0.822152	-0.735923	-1.16685
YKL041W	VPS24	FALSE	0	-0.697701	-1.10894	-1.16331
YNL141W	AAH1	FALSE	0	0.19336	-0.327516	-1.15702
YOR123C	LEO1	FALSE	0	-0.5019	-1.02687	-1.15505
YDR207C	UME6	FALSE	0	-0.523023	-0.46325	-1.15337
YNL227C	JJJ1	FALSE	0	0.253201	-0.29516	-1.15267
YDR392W	SPT3	FALSE	0	-0.19468	-0.344172	-1.15176
YNL163C	RIA1	TRUE	0	-0.393941	-0.682353	-1.1494
YPL226W	NEW1	FALSE	0	0.235039	-0.579184	-1.1493
YKL095W	YJU2	TRUE	0	-0.370863	-0.97576	-1.14681
YNL071W	LAT1	FALSE	0	-0.717939	-0.914846	-1.14414
YPR186C	PZF1	TRUE	0	0.236093	-0.369701	-1.14127
YOR147W	MDM32	FALSE	0	0.176192	-0.160079	-1.13602
YGR048W	UFD1	TRUE	0	-0.778246	-1.8463	-1.13467
YER086W	ILV1	FALSE	0	0.461045	-0.746579	-1.13284
YDR080W	VPS41	FALSE	0	-0.237331	-0.49077	-1.13003
YML105C	SEC65	TRUE	0	-0.809547	-2.11483	-1.13001
YOR274W	MOD5	FALSE	0	-0.851534	-0.893617	-1.12881
YOR329C	SCD5	TRUE	0	-0.61034	-0.700511	-1.12461
YPL126W	NAN1	TRUE	0	-0.248809	-0.685376	-1.11905
YCR081W	SRB8	FALSE	0	-0.385969	-0.513058	-1.11884
YER019W	ISC1	FALSE	0	-0.589164	-0.846668	-1.11815
YNL087W	TCB2	FALSE	0	-0.67136	-1.20483	-1.11597
YER087W	AIM10	FALSE	0	-0.353379	-0.614957	-1.11493
YPL104W	MSD1	FALSE	0	-0.466613	-0.777126	-1.11383
YDL185W	VMA1	FALSE	0	-0.205568	-0.388382	-1.11325
YOR080W	DIA2	FALSE	0	-0.32171	-1.07685	-1.10985
YOR260W	GCD1	TRUE	0	-0.221681	-0.460736	-1.10937
YMR307W	GAS1	FALSE	0	-0.678726	-0.670609	-1.10827
YNL059C	ARP5	FALSE	0	-0.265253	0.349649	-1.10339
YNL250W	RAD50	FALSE	0	0.208034	-0.497508	-1.09954
YGL206C	CHC1	FALSE	0	-0.860568	-1.34546	-1.0982
YIR012W	SQT1	TRUE	0	-0.226927	-0.516744	-1.09711
YNR053C	NOG2	TRUE	0	-0.57371	-1.22469	-1.0911
YGR155W	CYS4	FALSE	0	-0.569022	-0.655097	-1.08777
YBL105C	PKC1	TRUE	0	-0.629359	-1.34033	-1.07967
YJL054W	TIM54	TRUE	0	0.317849	-0.675079	-1.07737
YNL231C	PDR16	FALSE	0	-0.904742	-0.626113	-1.07511
YNL312W	RFA2	TRUE	0	-0.84936	-0.66515	-1.07435
YBL007C	SLA1	FALSE	0	-0.862729	-1.02135	-1.07244
YIL033C	BCY1	FALSE	0	-1.7408	-1.25597	-1.06969
YPL075W	GCR1	FALSE	0	-0.637067	-1.40332	-1.06503
YGL063W	PUS2	FALSE	0	-1.29173	-1.2387	-1.06498
YCR047C	BUD23	FALSE	0	-0.629494	-1.4403	-1.06233
YKR054C	DYN1	FALSE	0	-0.180949	-0.379317	-1.05563
YIL150C	MCM10	TRUE	0	-0.459711	-1.03748	-1.05481
YPR164W	MMS1	FALSE	0	0.571952	-0.693348	-1.05384
YDR049W	VMS1	FALSE	0	-0.569073	-0.973425	-1.05243
YGR092W	DBF2	FALSE	0	0.421015	-1.13648	-1.05205
YPL122C	TFB2	TRUE	0	-0.945871	-1.30024	-1.05052
YPL097W	MSY1	FALSE	0	-0.356022	-0.444791	-1.05003
YDR349C	YPS7	FALSE	0	-0.280874	-0.331274	-1.04635
YIL053W	GPP1	FALSE	0	-0.023667	-0.649955	-1.04591
YGL211W	NCS6	FALSE	0	-0.185389	0.397528	-1.04484
YKR086W	PRP16	TRUE	0	-0.223361	-1.1272	-1.04176
YKL082C	RRP14	TRUE	0	-0.507751	-0.536854	-1.0417
YGL048C	RPT6	TRUE	0	-0.78766	-1.16507	-1.0375
YOR373W	NUD1	TRUE	0	-0.235815	-0.745564	-1.03435
YDL014W	NOP1	TRUE	0	-0.897569	-1.52955	-1.03366
YPL125W	KAP120	FALSE	0	0.370019	-0.35244	-1.03353
YGL091C	NBP35	TRUE	0	-0.282122	-0.854419	-1.02711
YGL074C	YGL074C	TRUE	0	-1.28704	-1.51024	-1.02674
YMR016C	SOK2	FALSE	0	-0.418502	-0.399107	-1.02588
YKL203C	TOR2	TRUE	0	0.357974	-0.665671	-1.02527
YLR291C	GCD7	TRUE	0	-0.324032	-0.448304	-1.02325
YIL036W	CST6	FALSE	0	-0.254288	-0.669464	-1.01968
YPR168W	NUT2	TRUE	0	-0.247226	-0.233766	-1.01814
YNL062C	GCD10	TRUE	0	-0.478699	-0.4167	-1.01582
YGL167C	PMR1	FALSE	0	-0.404031	-0.420759	-1.01441
YMR153C-A	YMR153C-A	FALSE	0	-1.19981	-1.12082	-1.0143
YIL051C	MMF1	TRUE	0	0.13613	0.138007	-1.01228
YLR436C	ECM30	FALSE	0	0.313622	-0.727488	-1.01024
YPR183W	DPM1	TRUE	0	0.159682	-0.904036	-1.00506
YNL104C	LEU4	FALSE	0	-1.06897	-1.23616	-1.00355
YFL036W	RPO41	FALSE	0	-0.238252	0.274131	-1.00325
YLR163C	MAS1	TRUE	0	-0.6671	-1.09706	-1.00322
YMR190C	SGS1	FALSE	0	-0.559152	-0.637558	-1.00267
YPL128C	TBF1	TRUE	0	0.202706	-0.400913	-1.00168
YOL094C	RFC4	TRUE	0	0.459153	-0.594987	-1.00168
YMR231W	PEP5	FALSE	0	-0.268675	-0.494215	-1.00157
YGR204W	ADE3	FALSE	0	-0.639829	0.611463	-1.00048
YLR197W	NOP56	TRUE	0	0.312884	-0.503086	-0.994922
YGL087C	MMS2	FALSE	0	-0.202561	-0.530199	-0.994072
YHR069C	RRP4	TRUE	0	-0.481638	-0.987988	-0.993637
YLR075W	RPL10	TRUE	0	-1.22027	-1.68005	-0.992413
YMR043W	MCM1	TRUE	0	-0.326201	-1.12792	-0.99228
YLL018C	DPS1	TRUE	0	0.353911	-0.863428	-0.991701
YKL060C	FBA1	TRUE	0	-0.81423	-1.2877	-0.991022
YDL115C	IWR1	FALSE	0	-0.326138	-0.749459	-0.989539
YDL045C	FAD1	TRUE	0	0.26958	0.413058	-0.985496
YLR129W	DIP2	TRUE	0	-1.02318	-1.47814	-0.985128
YNL098C	RAS2	FALSE	0	-0.393564	-0.619038	-0.980236
YGR242W	YGR242W	FALSE	0	-0.772683	-0.536689	-0.974753
YNL232W	CSL4	TRUE	0	-1.21068	-1.4355	-0.971562
YPL086C	ELP3	FALSE	0	0.333511	-0.654945	-0.970346
YAL019W	FUN30	FALSE	0	0.304144	-0.251556	-0.969523
YJL001W	PRE3	TRUE	0	-0.549269	-0.572805	-0.968477
YMR093W	UTP15	TRUE	0	-0.601138	-0.977733	-0.968079
YMR294W	JNM1	FALSE	0	-0.35389	-0.661069	-0.962002
YIR029W	DAL2	FALSE	0	-0.260072	0.580122	-0.961799
YJR113C	RSM7	FALSE	0	-0.523392	-0.525474	-0.960284
YHR068W	DYS1	TRUE	0	0.242627	-0.671642	-0.957664
YIR005W	IST3	FALSE	0	0.309229	0.35371	-0.955158
YJR122W	IBA57	FALSE	0	-0.235152	-0.465057	-0.954596
YDR267C	CIA1	TRUE	0	0.218928	-0.437877	-0.954033
YFL016C	MDJ1	FALSE	0	0.184712	0.399611	-0.951021
YER171W	RAD3	TRUE	0	-0.83574	-0.952711	-0.949748
YLL007C	LMO1	FALSE	0	-0.233758	-0.329193	-0.94972
YPL242C	IQG1	TRUE	0	-0.685243	-1.40595	-0.949411
YMR277W	FCP1	TRUE	0	-0.47435	-0.943803	-0.945343
YHR012W	VPS29	FALSE	0	-0.614676	-0.820742	-0.945148
YDR389W	SAC7	FALSE	0	-0.333898	-0.600136	-0.945011
YDR137W	RGP1	FALSE	0	-0.156416	-0.38243	-0.942498
YGL012W	ERG4	FALSE	0	-0.485892	-0.530138	-0.941017
YHR157W	REC104	FALSE	0	0.105732	-0.154122	-0.933934
YMR049C	ERB1	TRUE	0	-0.551916	-0.698901	-0.933728
YGR065C	VHT1	TRUE	0	-0.362197	-0.99154	-0.933445
YPR135W	CTF4	FALSE	0	0.329555	-0.359774	-0.933255
YNL215W	IES2	FALSE	0	-0.260556	-0.34426	-0.931783
YMR058W	FET3	FALSE	0	-0.26472	-0.579672	-0.931608
YBR131W	CCZ1	FALSE	0	0.482876	0.392115	-0.930102
YBR267W	REI1	FALSE	0	-0.240588	-0.392356	-0.930056
YCR057C	PWP2	TRUE	0	-0.356503	0.497792	-0.929435
YBR154C	RPB5	TRUE	0	-0.307455	-0.49759	-0.927046
YML121W	GTR1	FALSE	0	-0.500148	-0.797647	-0.921386
YEL032W	MCM3	TRUE	0	-0.51899	-0.646645	-0.921113
YGR185C	TYS1	TRUE	0	-0.345813	-0.883802	-0.920385
YDR281C	PHM6	FALSE	0	-0.990764	-1.04827	-0.915259
YDR195W	REF2	FALSE	0	-0.440297	-0.698493	-0.913491
YER186C	YER186C	FALSE	0	-0.401821	-0.66661	-0.910824
YJL183W	MNN11	FALSE	0	-0.233125	-1.00682	-0.909952
YNL251C	NRD1	TRUE	0	-0.387385	-0.698622	-0.909601
YER016W	BIM1	FALSE	0	-0.428412	-0.403802	-0.909466
YNL291C	MID1	FALSE	0	0.268052	-0.663133	-0.908029
YGR280C	PXR1	TRUE	0	0.415746	-0.650654	-0.905973
YLL049W	LDB18	FALSE	0	-0.348765	-0.450284	-0.900409
YNL236W	SIN4	FALSE	0	-0.778243	-0.239909	-0.897524
YGL084C	GUP1	FALSE	0	0.157279	0.0944206	-0.896681
YDR470C	UGO1	FALSE	0	-0.302181	-0.489958	-0.89452
YDR473C	PRP3	TRUE	0	0.303807	-0.786989	-0.894391
YNL326C	PFA3	FALSE	0	0.280532	-0.385214	-0.892266
YDR211W	GCD6	TRUE	0	0.173657	0.334852	-0.891645
YDR161W	ACL4	FALSE	0	-0.774319	-0.831869	-0.891538
YNL191W	DUG3	FALSE	0	-0.480186	0.713936	-0.89061
YGR046W	TAM41	TRUE	0	0.326195	0.482052	-0.88956
YER120W	SCS2	FALSE	0	-0.285918	-0.407818	-0.888564
YPL174C	NIP100	FALSE	0	-0.330727	0.225636	-0.886438
YLR350W	ORM2	FALSE	0	-0.345562	-0.663832	-0.885552
YLR223C	IFH1	TRUE	0	0.388403	0.450344	-0.883267
YGR157W	CHO2	FALSE	0	0.148702	-0.765533	-0.882622
YGL112C	TAF6	TRUE	0	-0.608582	-0.944778	-0.880793
YPL053C	KTR6	FALSE	0	-0.863221	-1.11026	-0.878165
YKL074C	MUD2	FALSE	0	0.336754	-0.111448	-0.875286
YNL297C	MON2	FALSE	0	-0.247581	-0.510812	-0.874851
YJL186W	MNN5	FALSE	0	-0.263943	0.433413	-0.8744
YLR079W	SIC1	FALSE	0	-0.315801	-0.679986	-0.873868
YGR067C	YGR067C	FALSE	0	0.40629	-0.231317	-0.87272
YBR179C	FZO1	FALSE	0	0.212551	0.193622	-0.872223
YLR069C	MEF1	FALSE	0	0.497997	0.654982	-0.871861
YKL022C	CDC16	TRUE	0	-0.564639	-0.729426	-0.871224
YNR032W	PPG1	FALSE	0	-0.385226	-0.60163	-0.870802
YOR330C	MIP1	FALSE	0	-0.366201	-0.429799	-0.868589
YJL023C	PET130	FALSE	0	-0.507058	-0.522803	-0.86854
YML103C	NUP188	FALSE	0	-0.582713	-0.847767	-0.866894
YML061C	PIF1	FALSE	0	0.331699	-0.741153	-0.863848
YOR244W	ESA1	TRUE	0	0.267206	-0.661128	-0.863106
YNR006W	VPS27	FALSE	0	-0.441285	-0.383791	-0.856309
YBR286W	APE3	FALSE	0	-0.248479	-0.622137	-0.855636
YML065W	ORC1	TRUE	0	-0.245443	-0.364242	-0.855196
YBR003W	COQ1	FALSE	0	-0.41706	-0.405889	-0.854981
YPL012W	RRP12	TRUE	0	-0.295181	-0.822504	-0.852434
YBR121C	GRS1	FALSE	0	-0.217925	-0.357963	-0.851786
YFR051C	RET2	TRUE	0	-0.30619	-0.334501	-0.851721
YDR414C	ERD1	FALSE	0	-0.0931113	-0.162935	-0.850233
YGR103W	NOP7	TRUE	0	-0.26312	-0.473238	-0.849913
YLR188W	MDL1	FALSE	0	0.397227	-0.877931	-0.848451
YJL026W	RNR2	TRUE	0	-0.140189	-0.521704	-0.843201
YMR021C	MAC1	FALSE	0	-0.652661	-0.512563	-0.842502
YLR030W	YLR030W	FALSE	0	-0.371696	-0.258277	-0.840963
YAR014C	BUD14	FALSE	0	-0.292221	-0.544934	-0.837708
YOR208W	PTP2	FALSE	0	-0.274808	-0.760312	-0.835388
YKL213C	DOA1	FALSE	0	-0.375584	-0.625222	-0.832889
YBR098W	MMS4	FALSE	0	-0.226832	-0.209186	-0.831526
YMR001C	CDC5	TRUE	0	-0.705482	-1.2683	-0.83084
YER119C	AVT6	FALSE	0	0.149867	-0.766796	-0.829999
YGR262C	BUD32	FALSE	0	0.310528	-0.592341	-0.829975
YPL218W	SAR1	TRUE	0	0.16418	-0.699042	-0.829944
YHR194W	MDM31	FALSE	0	-0.241975	0.435457	-0.829614
YNL118C	DCP2	TRUE	0	-0.250991	0.647155	-0.829301
YDR120C	TRM1	FALSE	0	0.416773	0.473129	-0.828164
YHR119W	SET1	FALSE	0	0.242325	0.717446	-0.826776
YJR013W	GPI14	TRUE	0	0.327063	-1.11631	-0.824208
YJL176C	SWI3	FALSE	0	-0.277885	-1.15652	-0.82397
YAR018C	KIN3	FALSE	0	-0.376069	-0.594601	-0.822192
YHL018W	YHL018W	FALSE	0	-0.668578	-1.11239	-0.821304
YGR218W	CRM1	TRUE	0	-0.391529	-0.255104	-0.818755
YJR068W	RFC2	TRUE	0	-0.269409	-0.393293	-0.818457
YHR139C	SPS100	FALSE	0	-0.252037	-0.49112	-0.816923
YGR081C	SLX9	FALSE	0	-0.282313	-0.5846	-0.816629
YBR216C	YBP1	FALSE	0	0.488602	0.487572	-0.813212
YLR447C	VMA6	FALSE	0	0.363912	0.313772	-0.813107
YKR071C	DRE2	TRUE	0	-0.982174	-1.44412	-0.812513
YLR040C	AFB1	FALSE	0	-0.64136	-0.84317	-0.812428
YER167W	BCK2	FALSE	0	-0.944024	-0.470347	-0.811382
YGR224W	AZR1	FALSE	0	-1.07119	-1.00942	-0.809529
YPL029W	SUV3	FALSE	0	0.301765	-0.774533	-0.806257
YKR020W	VPS51	FALSE	0	-0.492206	-0.912048	-0.804699
YMR302C	YME2	FALSE	0	0.376698	-0.471226	-0.803371
YBR221C	PDB1	FALSE	0	-0.704638	-0.999049	-0.803289
YDR107C	TMN2	FALSE	0	-0.290216	-0.682991	-0.801273
YMR070W	MOT3	FALSE	0	-0.443548	-0.332045	-0.800866
YMR211W	DML1	TRUE	0	-0.238301	0.342957	-0.799414
YOL145C	CTR9	FALSE	0	-1.02262	-0.930146	-0.798558
YDL061C	RPS29B	FALSE	0	-0.665001	-0.871339	-0.797372
YGR196C	FYV8	FALSE	0	-0.0918561	-0.477429	-0.796068
YNR001C	CIT1	FALSE	0	-0.795767	-0.795262	-0.793966
YPL154C	PEP4	FALSE	0	-0.43145	-0.474346	-0.79125
YHR071C-A	YHR071C-A	FALSE	0	-0.71587	-1.57253	-0.790954
YER025W	GCD11	TRUE	0	-0.840156	-1.20968	-0.790666
YDR126W	SWF1	FALSE	0	0.0966555	-0.227145	-0.790014
YDR386W	MUS81	FALSE	0	0.15221	-0.6394	-0.78971
YDL064W	UBC9	TRUE	0	0.178792	-0.660983	-0.787777
YDL135C	RDI1	FALSE	0	-0.303872	-0.315037	-0.785368
YBR190W	YBR190W	TRUE	0	-0.86736	-0.794932	-0.784048
YNR036C	MRPS12	FALSE	0	-0.285971	-0.550992	-0.779886
YMR203W	TOM40	TRUE	0	-0.224465	-0.183209	-0.778127
YJL174W	KRE9	TRUE	0	-0.30986	-1.12346	-0.777216
YJL141C	YAK1	FALSE	0	0.205174	-0.342787	-0.776846
YIL020C	HIS6	FALSE	0	-0.326139	-0.332853	-0.776264
YKR099W	BAS1	FALSE	0	0.569921	-0.537646	-0.772838
YDL017W	CDC7	TRUE	0	0.302967	-0.295029	-0.771992
YOR294W	RRS1	TRUE	0	0.325029	-0.52306	-0.770645
YPL254W	HFI1	FALSE	0	-0.194049	-1.03076	-0.770393
YDR228C	PCF11	TRUE	0	-1.27182	-1.25707	-0.768666
YAL059W	ECM1	FALSE	0	-0.016837	-0.305732	-0.767879
YBR069C	TAT1	FALSE	0	-0.116473	-0.374332	-0.767277
YER178W	PDA1	FALSE	0	-0.51322	-0.488659	-0.7667
YBR202W	MCM7	TRUE	0	-0.534583	-0.781228	-0.766412
YNL260C	LTO1	TRUE	0	-0.13403	-0.318151	-0.7662
YPL249C	GYP5	FALSE	0	0.463929	0.332528	-0.763552
YHR122W	CIA2	TRUE	0	0.173397	-0.390878	-0.762984
YGR074W	SMD1	TRUE	0	-0.0501532	0.103221	-0.760719
YPR002W	PDH1	FALSE	0	-0.634161	-0.541146	-0.75978
YKL087C	CYT2	FALSE	0	-0.139924	-0.461696	-0.759685
YDR324C	UTP4	TRUE	0	-0.279413	-0.448264	-0.759098
YJL102W	MEF2	FALSE	0	0.356638	-0.277682	-0.758972
YHR091C	MSR1	FALSE	0	-0.225346	-0.563453	-0.757687
YOL121C	RPS19A	FALSE	0	0.121646	-0.33246	-0.756875
YFL045C	SEC53	TRUE	0	-0.8519	-0.53885	-0.756692
YLR081W	GAL2	FALSE	0	-0.880615	-0.835785	-0.755363
YHR186C	KOG1	TRUE	0	0.462992	0.514881	-0.75458
YJR104C	SOD1	FALSE	0	-0.39691	-0.394037	-0.752913
YIL112W	HOS4	FALSE	0	-0.211783	-0.362068	-0.750735
YDR345C	HXT3	FALSE	0	-0.0769774	-0.221659	-0.750174
YPL124W	SPC29	TRUE	0	0.162931	-0.549578	-0.747373
YDR320C	SWA2	FALSE	0	-0.0966367	0.0656262	-0.742923
YDR091C	RLI1	TRUE	0	-0.69994	-1.56146	-0.742774
YDL117W	CYK3	FALSE	0	-0.495483	-0.376814	-0.742285
YDR087C	RRP1	TRUE	0	-0.168621	-0.436233	-0.741473
YJL047C	RTT101	FALSE	0	0.0533781	-0.374963	-0.740202
YOR251C	TUM1	FALSE	0	-0.214261	-0.256084	-0.73713
YHR129C	ARP1	FALSE	0	-0.157515	-0.36407	-0.736928
YDR398W	UTP5	TRUE	0	-0.353109	-0.839161	-0.735512
YLR033W	RSC58	TRUE	0	0.157283	-0.283303	-0.730923
YPL225W	YPL225W	FALSE	0	-0.0131436	-0.145798	-0.730922
YNL096C	RPS7B	FALSE	0	-0.155168	-0.504175	-0.730028
YFL002C	SPB4	TRUE	0	0.277509	-0.379399	-0.729452
YIR033W	MGA2	FALSE	0	-0.330219	-0.707074	-0.728805
YKL161C	KDX1	FALSE	0	-0.316486	-0.37424	-0.72869
YER154W	OXA1	FALSE	0	-0.81229	-0.627545	-0.726785
YFR031C	SMC2	TRUE	0	-0.519362	-1.00267	-0.726746
YNL310C	ZIM17	TRUE	0	-0.214057	-0.396912	-0.726624
YGR143W	SKN1	FALSE	0	0.293312	-0.44324	-0.7264
YML023C	NSE5	TRUE	0	-0.145037	-0.493422	-0.725929
YOR176W	HEM15	TRUE	0	0.161644	-0.336097	-0.724487
YJR064W	CCT5	TRUE	0	-0.223641	-0.201843	-0.72382
YJR123W	RPS5	TRUE	0	-0.601651	-0.52586	-0.723538
YDR090C	YDR090C	FALSE	0	-0.473503	-0.548525	-0.723436
YJL212C	OPT1	FALSE	0	-0.38966	-0.504945	-0.723344
YMR306W	FKS3	FALSE	0	0.554988	-1.20136	-0.721184
YNL313C	EMW1	TRUE	0	0.384969	-0.523675	-0.720601
YOL014W	YOL014W	FALSE	0	0.107835	-0.311479	-0.719194
YPL243W	SRP68	TRUE	0	-1.05373	-1.83327	-0.71868
YGL045W	RIM8	FALSE	0	-0.32751	-0.646537	-0.717813
YER095W	RAD51	FALSE	0	-0.432378	-0.726822	-0.717563
YKL014C	URB1	TRUE	0	-0.405749	-0.564203	-0.717025
YNL317W	PFS2	TRUE	0	-0.599378	0.250884	-0.716265
YHR023W	MYO1	TRUE	0	0.383631	0.373057	-0.714556
YLR387C	REH1	FALSE	0	-0.142426	0.0746476	-0.713311
YER168C	CCA1	TRUE	0	0.451628	-0.337873	-0.71213
YMR194C-A	YMR194C-A	FALSE	0	-0.593212	-0.485433	-0.709726
YLL012W	YEH1	FALSE	0	0.181527	-0.706332	-0.707809
YPL260W	CUB1	FALSE	0	-0.502416	-0.653724	-0.707654
YDR315C	IPK1	FALSE	0	-0.258563	-0.166773	-0.707131
YDR488C	PAC11	FALSE	0	-0.211785	-0.942244	-0.706334
YDR334W	SWR1	FALSE	0	0.250787	-0.701428	-0.706092
YNL307C	MCK1	FALSE	0	-0.141918	-0.341235	-0.703893
YKL144C	RPC25	TRUE	0	-0.316125	-0.693915	-0.703888
YPL217C	BMS1	TRUE	0	0.386084	0.537747	-0.702053
YKR002W	PAP1	TRUE	0	-0.351009	-0.577116	-0.70085
YIL068C	SEC6	TRUE	0	-0.985474	-1.14217	-0.700144
YFR027W	ECO1	TRUE	0	-0.25806	-0.778814	-0.698929
YOR266W	PNT1	FALSE	0	-0.315276	-0.419727	-0.696837
YBL092W	RPL32	TRUE	0	-0.579717	-0.860382	-0.694621
YGL001C	ERG26	TRUE	0	-0.355085	-0.838412	-0.694097
YDL101C	DUN1	FALSE	0	-0.176335	-0.344561	-0.693308
YBR224W	YBR224W	FALSE	0	-0.623182	-0.763977	-0.693264
YHL006C	SHU1	FALSE	0	-0.471141	-0.230491	-0.693259
YML091C	RPM2	TRUE	0	-0.382577	-0.396996	-0.693215
YEL045C	YEL045C	FALSE	0	-0.313976	-0.204748	-0.6929
YBR173C	UMP1	FALSE	0	-0.066947	-0.4608	-0.692727
YDR250C	YDR250C	FALSE	0	-0.369571	0.315369	-0.69241
YLR398C	SKI2	FALSE	0	0.268969	0.397196	-0.692178
YNL072W	RNH201	FALSE	0	-0.23273	-0.323331	-0.691237
YPR068C	HOS1	FALSE	0	0.202708	-0.497257	-0.690213
YDR060W	MAK21	TRUE	0	-0.323022	-0.502279	-0.6865
YNL067W	RPL9B	FALSE	0	0.0762742	-0.461906	-0.686205
YFR037C	RSC8	TRUE	0	0.3371	-0.50724	-0.686158
YLR027C	AAT2	FALSE	0	-0.24911	-0.291399	-0.686121
YKL212W	SAC1	FALSE	0	0.264755	-0.380875	-0.685481
YER148W	SPT15	TRUE	0	-0.446347	-0.259756	-0.685307
YLR237W	THI7	FALSE	0	0.342383	-0.363316	-0.685078
YLR381W	CTF3	FALSE	0	-0.347021	-0.697495	-0.684334
YGL100W	SEH1	FALSE	0	0.435291	0.4083	-0.682512
YDL178W	DLD2	FALSE	0	-0.454638	-0.808224	-0.681969
YKL127W	PGM1	FALSE	0	-0.648429	-0.66921	-0.681506
YMR253C	YMR253C	FALSE	0	-0.453456	-0.383218	-0.681242
YDL159W	STE7	FALSE	0	0.385005	-0.682413	-0.680575
YPL057C	SUR1	FALSE	0	-0.327015	-0.374125	-0.679225
YDR074W	TPS2	FALSE	0	0.479803	-0.532998	-0.678489
YDL083C	RPS16B	FALSE	0	-0.39649	-0.649385	-0.678316
YNL172W	APC1	TRUE	0	-0.226235	0.282767	-0.675952
YDR482C	CWC21	FALSE	0	0.183248	0.381033	-0.674352
YNL271C	BNI1	FALSE	0	0.331561	0.383087	-0.674243
YLR348C	DIC1	FALSE	0	-0.33387	0.356485	-0.673779
YER156C	YER156C	FALSE	0	0.279335	0.411915	-0.671094
YKL004W	AUR1	TRUE	0	-0.490338	-0.660383	-0.670976
YML107C	PML39	FALSE	0	-0.357067	0.356245	-0.670609
YBR198C	TAF5	TRUE	0	-0.140374	-0.727258	-0.66913
YER014W	HEM14	FALSE	0	0.720829	0.606844	-0.669109
YCL008C	STP22	FALSE	0	0.75506	-0.496561	-0.669086
YNL080C	EOS1	FALSE	0	-0.173009	-0.504088	-0.667442
YER044C	ERG28	FALSE	0	-0.139561	-0.504818	-0.66682
YKR052C	MRS4	FALSE	0	-0.333212	0.292553	-0.666804
YLR288C	MEC3	FALSE	0	0.266843	-0.166768	-0.666527
YGR267C	FOL2	TRUE	0	-0.392062	-0.647183	-0.664383
YOL103W	ITR2	FALSE	0	-0.525262	-0.264173	-0.662813
YLL028W	TPO1	FALSE	0	0.344839	-0.323083	-0.662168
YGR195W	SKI6	TRUE	0	0.34338	-0.464422	-0.660728
YOL004W	SIN3	FALSE	0	-0.45003	-0.545537	-0.658552
YIL088C	AVT7	FALSE	0	0.0564373	-0.22309	-0.657469
YLR247C	IRC20	FALSE	0	0.312604	-0.578678	-0.657424
YGL139W	FLC3	FALSE	0	-0.266895	-0.337784	-0.657054
YOR348C	PUT4	FALSE	0	-0.565964	-0.650171	-0.656677
YGL137W	SEC27	TRUE	0	-0.310679	-0.714332	-0.656442
YML018C	YML018C	FALSE	0	0.260172	0.211732	-0.655575
YGR057C	LST7	FALSE	0	0.300606	-0.384781	-0.655009
YFL044C	OTU1	FALSE	0	-0.441891	-0.377331	-0.654689
YMR279C	YMR279C	FALSE	0	-0.765009	0.581032	-0.653903
YOR033C	EXO1	FALSE	0	-0.162589	-0.391073	-0.653602
YHL004W	MRP4	FALSE	0	-0.32842	-0.364649	-0.653345
YDR097C	MSH6	FALSE	0	-0.402208	-0.647078	-0.652367
YER091C	MET6	FALSE	0	-0.288366	-0.363576	-0.652003
YCR011C	ADP1	FALSE	0	0.353077	0.266289	-0.64734
YMR179W	SPT21	FALSE	0	0.269829	-0.27717	-0.647136
YLR207W	HRD3	FALSE	0	0.436156	0.381029	-0.64569
YBR246W	RRT2	FALSE	0	-0.261203	-0.332437	-0.64552
YDR448W	ADA2	FALSE	0	-0.759917	-0.890629	-0.643312
YBL051C	PIN4	FALSE	0	0.234069	0.25624	-0.642458
YEL027W	VMA3	FALSE	0	-0.159893	-0.630717	-0.640099
YNL161W	CBK1	TRUE	0	-0.19227	-0.623052	-0.639755
YCL041C	YCL041C	FALSE	0	-0.441848	-0.220451	-0.639734
YKL149C	DBR1	FALSE	0	-0.151727	-0.169937	-0.639604
YCR032W	BPH1	FALSE	0	-0.233063	-0.555029	-0.638248
YKL172W	EBP2	TRUE	0	-0.184739	-0.960586	-0.637821
YLR046C	YLR046C	FALSE	0	0.265054	0.341755	-0.637007
YGL028C	SCW11	FALSE	0	-0.623401	0.299091	-0.636908
YNL073W	MSK1	FALSE	0	-0.093434	0.0578914	-0.63476
YPL208W	RKM1	FALSE	0	-0.097498	-0.483193	-0.634469
YGR001C	EFM5	FALSE	0	-0.559753	-0.713886	-0.634252
YGR208W	SER2	FALSE	0	-0.507666	-0.684047	-0.633243
YJR039W	YJR039W	FALSE	0	-0.227244	-0.153041	-0.632612
YDR541C	YDR541C	FALSE	0	-0.253861	-0.385512	-0.632561
YNL275W	BOR1	FALSE	0	0.437969	-0.547471	-0.632057
YOR359W	VTS1	FALSE	0	0.269121	-0.280603	-0.631904
YPL054W	LEE1	FALSE	0	-0.15018	-0.192137	-0.630941
YBL017C	PEP1	FALSE	0	-0.183419	-0.686786	-0.630805
YOR165W	SEY1	FALSE	0	0.220476	-0.306104	-0.629339
YDR463W	STP1	FALSE	0	0.363473	0.394854	-0.629301
YBL099W	ATP1	FALSE	0	-0.25942	-0.205218	-0.629184
YPR141C	KAR3	FALSE	0	0.238045	-0.419637	-0.629152
YGR125W	YGR125W	FALSE	0	0.341983	-0.577198	-0.628177
YFR038W	IRC5	FALSE	0	-0.36553	0.414665	-0.627674
YGR289C	MAL11	FALSE	0	-0.536246	-0.761785	-0.626742
YDL221W	YDL221W	TRUE	0	0.369899	0.512426	-0.626282
YIL109C	SEC24	TRUE	0	-0.421187	-0.518555	-0.625813
YER017C	AFG3	FALSE	0	-0.294212	-0.4079	-0.625227
YJL062W	LAS21	FALSE	0	-0.475977	-0.278435	-0.625152
YKR102W	FLO10	FALSE	0	-0.84317	-1.02091	-0.624396
YCL025C	AGP1	FALSE	0	-0.491175	0.396928	-0.624343
YPL212C	PUS1	FALSE	0	0.144747	-0.37614	-0.62378
YDL194W	SNF3	FALSE	0	-0.318215	-0.496135	-0.623611
YNL003C	PET8	FALSE	0	-0.675313	-0.839794	-0.623578
YHR147C	MRPL6	FALSE	0	-0.194952	-0.155217	-0.622708
YGL082W	YGL082W	FALSE	0	-0.604513	-0.490628	-0.621442
YGR271W	SLH1	FALSE	0	-0.228439	-0.488735	-0.62016
YDR524W-C	YDR524W-C	FALSE	0	-0.557595	-0.781681	-0.619835
YMR078C	CTF18	FALSE	0	0.300591	-0.347765	-0.619142
YDR375C	BCS1	FALSE	0	-0.500411	-0.623764	-0.618746
YPR009W	SUT2	FALSE	0	0.229529	-0.351798	-0.618726
YOR157C	PUP1	TRUE	0	-0.297189	-0.438447	-0.618096
YHR205W	SCH9	FALSE	0	-0.864205	-0.873983	-0.61794
YPL009C	RQC2	FALSE	0	-0.253396	-0.421441	-0.617314
YMR026C	PEX12	FALSE	0	0.167759	0.488529	-0.61686
YDL080C	THI3	FALSE	0	0.222796	-0.35074	-0.615629
YIL118W	RHO3	TRUE	0	-0.259629	-0.379321	-0.615269
YPR107C	YTH1	TRUE	0	-0.766259	-0.569144	-0.615015
YOR113W	AZF1	FALSE	0	-0.254572	-0.458023	-0.614631
YER124C	DSE1	FALSE	0	-0.387965	-0.45969	-0.612318
YGR087C	PDC6	FALSE	0	-0.347017	-0.520919	-0.611993
YGL010W	MPO1	FALSE	0	-0.366024	-0.776956	-0.610916
YHR029C	YHI9	FALSE	0	0.0887117	-0.487104	-0.610585
YIR002C	MPH1	FALSE	0	-0.105753	-0.25606	-0.609584
YAL026C	DRS2	FALSE	0	0.370998	0.410625	-0.60956
YFL033C	RIM15	FALSE	0	-0.251457	-0.327172	-0.609494
YGR171C	MSM1	FALSE	0	-0.338328	-0.30859	-0.609455
YPL237W	SUI3	TRUE	0	-0.268795	-0.29373	-0.609244
YKL073W	LHS1	FALSE	0	0.249879	-0.156429	-0.608566
YGR124W	ASN2	FALSE	0	-0.369002	-0.634335	-0.608441
YPR161C	SGV1	TRUE	0	-0.196564	-0.502747	-0.608417
YBL088C	TEL1	FALSE	0	-0.230514	0.460004	-0.607297
YOR144C	ELG1	FALSE	0	0.154269	-0.111552	-0.606963
YPR024W	YME1	FALSE	0	0.163472	0.37148	-0.606424
YOL066C	RIB2	TRUE	0	0.307902	0.350848	-0.606084
YHR018C	ARG4	FALSE	0	0.145807	0.302259	-0.605919
YGR165W	MRPS35	FALSE	0	0.0475762	-0.187569	-0.605283
YGR005C	TFG2	TRUE	0	-0.470181	-0.48174	-0.605226
YIL019W	FAF1	TRUE	0	0.323741	-0.281963	-0.603502
YOL017W	ESC8	FALSE	0	0.198956	-0.457836	-0.603295
YDR507C	GIN4	FALSE	0	-0.393247	0.418775	-0.603153
YOR371C	GPB1	FALSE	0	-0.416461	-0.303846	-0.60085
YDR145W	TAF12	TRUE	0	-0.535217	-0.763614	-0.600568
YDR466W	PKH3	FALSE	0	0.365333	-0.630944	-0.599757
YER012W	PRE1	TRUE	0	-0.425005	0.590865	-0.599617
YNL021W	HDA1	FALSE	0	0.129865	0.292662	-0.599012
YOR070C	GYP1	FALSE	0	0.237419	0.247444	-0.598502
YDR388W	RVS167	FALSE	0	0.359766	0.389962	-0.598488
YCR077C	PAT1	FALSE	0	0.28692	0.350905	-0.598169
YER068W	MOT2	FALSE	0	-0.280686	-0.596957	-0.597336
YLR394W	CST9	FALSE	0	-0.0637215	0.0720925	-0.597333
YJL092W	SRS2	FALSE	0	-0.199568	0.444557	-0.596589
YDR065W	RRG1	FALSE	0	-0.502363	-0.571593	-0.595476
YMR012W	CLU1	FALSE	0	0.25018	0.443615	-0.595444
YGR243W	MPC3	FALSE	0	-0.0739419	-0.153308	-0.594131
YBR140C	IRA1	TRUE	0	0.192085	-0.548595	-0.594058
YOR149C	SMP3	TRUE	0	0.308534	0.465917	-0.593905
YKR068C	BET3	TRUE	0	-0.187009	-0.180539	-0.593803
YLL063C	AYT1	FALSE	0	0.0294306	-0.313161	-0.591444
YDR050C	TPI1	TRUE	0	-0.0977397	0.195014	-0.59105
YKR058W	GLG1	FALSE	0	0.136311	0.259235	-0.590479
YKL191W	DPH2	FALSE	0	0.19515	0.322893	-0.589924
YPL047W	SGF11	FALSE	0	0.13067	-0.386008	-0.589369
YDL141W	BPL1	TRUE	0	-0.358121	-0.446037	-0.589358
YOL055C	THI20	FALSE	0	0.455884	-0.590417	-0.588837
YDL210W	UGA4	FALSE	0	-0.90427	-1.10217	-0.588742
YAR015W	ADE1	FALSE	0	-0.408245	-0.680554	-0.588316
YOR049C	RSB1	FALSE	0	0.147988	-0.103128	-0.586072
YDR323C	PEP7	FALSE	0	0.463634	-0.592148	-0.585614
YHR031C	RRM3	FALSE	0	0.160689	-0.384849	-0.585187
YGR172C	YIP1	TRUE	0	-0.262595	-0.343151	-0.584729
YHR048W	YHK8	FALSE	0	-0.351175	-0.456145	-0.584599
YHL035C	VMR1	FALSE	0	0.240487	0.436802	-0.584312
YPR104C	FHL1	TRUE	0	0.302419	0.203426	-0.583302
YLR372W	ELO3	FALSE	0	-0.149185	-0.251262	-0.583007
YKL005C	BYE1	FALSE	0	0.0735756	-0.449242	-0.582761
YBR238C	YBR238C	FALSE	0	-0.195233	-0.185512	-0.581446
YCL009C	ILV6	FALSE	0	0.09457	-0.252273	-0.581259
YOR099W	KTR1	FALSE	0	-0.558309	-1.00057	-0.581243
YLR361C	DCR2	FALSE	0	0.485217	0.302017	-0.580419
YOL041C	NOP12	FALSE	0	0.203079	-0.297458	-0.580383
YDR376W	ARH1	TRUE	0	0.243738	-0.322254	-0.580172
YFR013W	IOC3	FALSE	0	0.372241	-0.228508	-0.580051
YKR089C	TGL4	FALSE	0	-0.400862	0.405108	-0.579912
YGL003C	CDH1	FALSE	0	-0.250503	-0.293701	-0.579795
YBR205W	KTR3	FALSE	0	0.0398906	0.396407	-0.579588
YHR046C	INM1	FALSE	0	-0.446343	-0.631347	-0.579171
YDR017C	KCS1	FALSE	0	-0.324239	-0.215234	-0.578923
YGL078C	DBP3	FALSE	0	0.355068	-0.455419	-0.578852
YPR115W	RGC1	FALSE	0	-0.216541	0.386451	-0.578795
YDR409W	SIZ1	FALSE	0	0.358582	-0.541385	-0.578705
YNL287W	SEC21	TRUE	0	-0.46868	-0.753767	-0.576766
YPL176C	TRE1	FALSE	0	-0.472445	-0.601907	-0.575972
YGL175C	SAE2	FALSE	0	0.00352072	-0.696607	-0.575933
YPL224C	MMT2	FALSE	0	-0.159986	-0.412437	-0.57474
YOR140W	SFL1	FALSE	0	-0.168143	-0.205856	-0.574236
YGR093W	DRN1	FALSE	0	-0.428576	-0.448843	-0.573613
YNL282W	POP3	TRUE	0	-0.0592968	-0.467091	-0.573027
YOL138C	RTC1	FALSE	0	0.336468	0.404594	-0.571688
YJR066W	TOR1	FALSE	0	0.108162	0.309522	-0.571627
YCR084C	TUP1	FALSE	0	0.173208	-0.413487	-0.570858
YPL119C-A	YPL119C-A	FALSE	0	-0.268483	-0.698442	-0.570476
YHR197W	RIX1	TRUE	0	-0.287075	-0.375956	-0.570126
YDR238C	SEC26	TRUE	0	-0.927492	-1.43566	-0.5701
YOL051W	GAL11	FALSE	0	-1.06159	-1.06097	-0.570073
YOR296W	YOR296W	FALSE	0	0.425334	0.325829	-0.569089
YBR001C	NTH2	FALSE	0	-0.769136	-1.42457	-0.568573
YMR087W	YMR087W	FALSE	0	0.104359	0.0423944	-0.568573
YLR165C	PUS5	FALSE	0	-0.246332	-0.223755	-0.567861
YLR378C	SEC61	TRUE	0	-0.490139	-0.900464	-0.567036
YPL023C	MET12	FALSE	0	0.224421	-0.504899	-0.566756
YBR068C	BAP2	FALSE	0	-0.153358	0.338455	-0.566744
YBR117C	TKL2	FALSE	0	-0.52006	0.463187	-0.56633
YBR059C	AKL1	FALSE	0	0.187929	-0.199116	-0.566185
YPL069C	BTS1	FALSE	0	-0.222387	-0.342676	-0.565667
YDR422C	SIP1	FALSE	0	0.293226	0.760307	-0.565604
YBR252W	DUT1	TRUE	0	-0.312987	-0.616484	-0.565364
YNL017C	YNL017C	FALSE	0	-0.556485	-0.505883	-0.56441
YHR062C	RPP1	TRUE	0	-0.518006	-1.14392	-0.563963
YML085C	TUB1	TRUE	0	-0.493846	-0.47697	-0.563614
YKL125W	RRN3	TRUE	0	0.043794	-0.349894	-0.562221
YML049C	RSE1	TRUE	0	0.214195	-0.26523	-0.562079
YDR434W	GPI17	TRUE	0	-0.0584054	-0.55231	-0.561923
YDR438W	THI74	FALSE	0	-0.10073	-0.314058	-0.560894
YJL076W	NET1	TRUE	0	-0.415946	-0.570093	-0.558843
YDR179W-A	NVJ3	FALSE	0	-0.199392	-0.332699	-0.558764
YGR281W	YOR1	FALSE	0	-0.234639	0.330158	-0.556771
YBR208C	DUR1,2	FALSE	0	0.47406	0.323269	-0.556612
YNL068C	FKH2	FALSE	0	-0.34368	-0.507444	-0.555413
YHL029C	OCA5	FALSE	0	-0.300158	-0.302363	-0.555066
YDL095W	PMT1	FALSE	0	0.36403	0.359782	-0.554907
YLR039C	RIC1	FALSE	0	0.251368	-0.314488	-0.554642
YDL074C	BRE1	FALSE	0	-0.215517	-0.317468	-0.554321
YOR114W	YOR114W	FALSE	0	0.0393071	-0.183062	-0.551645
YLR343W	GAS2	FALSE	0	-0.320924	-0.324658	-0.551284
YOR090C	PTC5	FALSE	0	-0.536417	-0.589593	-0.548201
YKL155C	RSM22	FALSE	0	0.253536	0.489893	-0.547991
YMR303C	ADH2	FALSE	0	-0.294206	-0.504834	-0.547024
YPR026W	ATH1	FALSE	0	0.653573	0.448224	-0.544964
YDL084W	SUB2	TRUE	0	-0.340905	-0.345666	-0.544255
YEL023C	YEL023C	FALSE	0	-0.261822	-0.492984	-0.544125
YLR425W	TUS1	FALSE	0	-0.393623	-0.462111	-0.543655
YPL204W	HRR25	TRUE	0	0.134895	-0.20687	-0.542441
YER106W	MAM1	FALSE	0	0.106254	-0.121169	-0.542201
YHL011C	PRS3	FALSE	0	0.124424	0.21023	-0.542074
YOL126C	MDH2	FALSE	0	-0.114927	-0.317682	-0.539314
YNL185C	MRPL19	FALSE	0	-0.113063	-0.159409	-0.538335
YOL019W	YOL019W	FALSE	0	-0.215427	-0.200499	-0.53713
YER145C-A	YER145C-A	FALSE	0	-0.482865	-0.984061	-0.536635
YLL039C	UBI4	FALSE	0	-0.0465104	-0.338558	-0.536113
YBR225W	YBR225W	FALSE	0	-0.175407	-0.341371	-0.53601
YDR310C	SUM1	FALSE	0	0.288753	-0.264562	-0.535874
YOL131W	YOL131W	FALSE	0	-0.474414	-0.24138	-0.535662
YML126C	ERG13	TRUE	0	-0.413603	-0.38034	-0.53468
YIL043C	CBR1	FALSE	0	-0.429402	-0.516684	-0.534574
YLR241W	CSC1	FALSE	0	-0.456956	-0.461666	-0.534401
YJL115W	ASF1	FALSE	0	-0.52527	-0.271195	-0.534146
YJL106W	IME2	FALSE	0	-0.264205	-0.366347	-0.534013
YOR125C	CAT5	FALSE	0	0.107432	-0.389898	-0.533335
YML064C	TEM1	TRUE	0	0.301991	0.343032	-0.533259
YDR146C	SWI5	FALSE	0	-0.02952	-0.276642	-0.532921
YDR206W	EBS1	FALSE	0	0.34861	0.494942	-0.532865
YDR322W	MRPL35	FALSE	0	-0.605806	-0.810474	-0.531875
YPR184W	GDB1	FALSE	0	0.393868	0.649386	-0.531761
YOL036W	YOL036W	FALSE	0	-0.0442088	-0.252168	-0.531705
YBR004C	GPI18	TRUE	0	-0.167584	0.190087	-0.531253
YBR028C	YPK3	FALSE	0	-0.354138	-0.187823	-0.530787
YEL024W	RIP1	FALSE	0	-0.36672	-0.590565	-0.529886
YBR018C	GAL7	FALSE	0	-1.85597	-1.05891	-0.529028
YPL061W	ALD6	FALSE	0	0.437187	0.390314	-0.528611
YPL003W	ULA1	FALSE	0	-0.180219	-0.206401	-0.528134
YOR193W	PEX27	FALSE	0	-0.37784	-0.849561	-0.52686
YAL049C	AIM2	FALSE	0	-0.278284	-0.21834	-0.526691
YJR060W	CBF1	FALSE	0	-0.226809	-0.330784	-0.526479
YER164W	CHD1	FALSE	0	0.849161	0.444832	-0.524635
YBL047C	EDE1	FALSE	0	0.352003	0.400852	-0.524499
YBL015W	ACH1	FALSE	0	-0.167578	0.26337	-0.52409
YNL138W	SRV2	FALSE	0	0.0972154	-0.252878	-0.523899
YBR020W	GAL1	FALSE	0	-0.577254	0.0858778	-0.523472
YOR124C	UBP2	FALSE	0	-0.504418	-0.22039	-0.523307
YBR084W	MIS1	FALSE	0	-0.431307	0.516977	-0.523053
YOR162C	YRR1	FALSE	0	0.14201	-0.211677	-0.522875
YCR035C	RRP43	TRUE	0	-0.322987	-0.520227	-0.521954
YGR234W	YHB1	FALSE	0	0.270421	0.439981	-0.521576
YIL005W	EPS1	FALSE	0	-0.195651	-0.337501	-0.521321
YOR161C	PNS1	FALSE	0	-0.185063	0.476723	-0.520268
YNR039C	ZRG17	FALSE	0	0.155223	-0.187331	-0.519025
YAL058W	CNE1	FALSE	0	-0.209588	-0.297574	-0.516949
YNL012W	SPO1	FALSE	0	-0.35679	0.408183	-0.516365
YOR250C	CLP1	TRUE	0	-0.413236	-0.51538	-0.515889
YNL127W	FAR11	FALSE	0	0.298426	-0.580387	-0.51538
YHL030W	ECM29	FALSE	0	0.307885	-0.25702	-0.515312
YEL035C	UTR5	TRUE	0	-0.383936	-0.36443	-0.514676
YKL205W	LOS1	FALSE	0	0.0695027	0.490413	-0.514046
YBR180W	DTR1	FALSE	0	0.465219	0.62299	-0.514013
YOR016C	ERP4	FALSE	0	-0.170242	-0.34335	-0.513145
YAL067C	SEO1	FALSE	0	0.200027	-0.0832405	-0.512671
YBR115C	LYS2	FALSE	0	-0.466446	-0.65072	-0.512657
YDR291W	HRQ1	FALSE	0	-0.25393	0.31133	-0.510866
YGL195W	GCN1	FALSE	0	0.432145	0.338889	-0.510652
YLR371W	ROM2	FALSE	0	-0.19789	-0.372519	-0.510133
YJL086C	YJL086C	TRUE	0	-0.283705	0.212466	-0.50933
YBL067C	UBP13	FALSE	0	-0.42753	-0.417489	-0.508878
YLR009W	RLP24	TRUE	0	0.129105	-0.434118	-0.508578
YKL134C	OCT1	FALSE	0	-0.343782	-0.499153	-0.5081
YDR221W	GTB1	FALSE	0	-0.223488	-0.323734	-0.507898
YOR268C	YOR268C	FALSE	0	-0.23246	-0.414366	-0.507431
YOR110W	TFC7	TRUE	0	-0.299608	0.390245	-0.507133
YMR047C	NUP116	TRUE	0	-0.296805	-0.843153	-0.506601
YOL160W	YOL160W	FALSE	0	-0.339942	0.122381	-0.50606
YOR045W	TOM6	FALSE	0	0.15147	-0.151911	-0.505054
YMR283C	RIT1	FALSE	0	0.129463	0.349879	-0.504629
YJR077C	MIR1	FALSE	0	-0.227993	-0.43206	-0.504519
YFR026C	ULI1	FALSE	0	-0.307964	-0.339858	-0.504495
YML010W	SPT5	TRUE	0	-0.326963	-0.397261	-0.504318
YGR217W	CCH1	FALSE	0	-0.264623	-0.537859	-0.503593
YNL125C	ESBP6	FALSE	0	0.240155	-0.318806	-0.50316
YBR218C	PYC2	FALSE	0	-0.380364	-0.496705	-0.502956
YER126C	NSA2	TRUE	0	0.13515	0.451187	-0.502901
YLR323C	CWC24	TRUE	0	-0.156449	0.348932	-0.502551
YIL064W	EFM4	FALSE	0	-0.325462	-0.417829	-0.501876
YNR059W	MNT4	FALSE	0	0.140995	0.18055	-0.501517
YGR258C	RAD2	FALSE	0	-0.534155	-0.319911	-0.501108
YOR353C	SOG2	TRUE	0	-0.256724	-0.549742	-0.49993
YHL036W	MUP3	FALSE	0	0.214239	-0.231064	-0.499451
YHR161C	YAP1801	FALSE	0	0.357001	0.346358	-0.498968
YOR183W	FYV12	FALSE	0	-0.507189	-0.305606	-0.498697
YIL161W	YIL161W	FALSE	0	0.413511	-0.336861	-0.498696
YDR431W	YDR431W	FALSE	0	-0.967515	-0.91322	-0.498693
YBR293W	VBA2	FALSE	0	-0.248428	-0.362243	-0.498129
YFL025C	BST1	FALSE	0	-0.373952	-0.443823	-0.497519
YMR201C	RAD14	FALSE	0	-0.191473	-0.325698	-0.497498
YJR036C	HUL4	FALSE	0	-0.322599	0.534702	-0.497427
YOR014W	RTS1	FALSE	0	-0.230173	-0.287284	-0.496889
YNL257C	SIP3	FALSE	0	-0.424349	-0.646294	-0.496505
YGL255W	ZRT1	FALSE	0	-0.25858	-0.309507	-0.496384
YHR114W	BZZ1	FALSE	0	-0.175737	-0.200197	-0.496201
YHR005C-A	TIM10	TRUE	0	-0.21685	-0.386497	-0.494769
YGL185C	YGL185C	FALSE	0	-0.261423	-0.592705	-0.49341
YCR024C	SLM5	FALSE	0	-0.111501	0.230577	-0.49125
YDL112W	TRM3	FALSE	0	-0.135858	0.369401	-0.491175
YMR097C	MTG1	FALSE	0	-0.273203	-0.41109	-0.490945
YKL198C	PTK1	FALSE	0	0.20891	-0.783815	-0.489198
YML054C	CYB2	FALSE	0	-0.321054	0.0759217	-0.489128
YDR061W	YDR061W	FALSE	0	-0.324615	-0.445192	-0.488438
YNR002C	ATO2	FALSE	0	-0.246334	-0.24543	-0.487892
YGR216C	GPI1	TRUE	0	-0.252741	-0.387164	-0.486876
YIL140W	AXL2	FALSE	0	-0.0623046	-0.448403	-0.486587
YFR015C	GSY1	FALSE	0	-0.367207	-0.507952	-0.486207
YIL123W	SIM1	FALSE	0	-0.428935	-0.45051	-0.486134
YNR003C	RPC34	TRUE	0	0.287046	-0.185216	-0.486067
YKR048C	NAP1	FALSE	0	0.481538	0.722305	-0.485673
YKR090W	PXL1	FALSE	0	-0.176541	-0.451503	-0.485512
YPL084W	BRO1	FALSE	0	-0.201561	-0.459625	-0.485145
YLL006W	MMM1	FALSE	0	0.316143	-0.385527	-0.484663
YMR285C	NGL2	FALSE	0	-0.0534024	-0.261762	-0.484473
YDR359C	EAF1	FALSE	0	-0.36601	-0.343143	-0.484112
YAL017W	PSK1	FALSE	0	-0.313352	-0.494363	-0.483973
YPR138C	MEP3	FALSE	0	-0.450701	-0.409693	-0.4836
YMR227C	TAF7	TRUE	0	-0.499004	-0.643238	-0.483577
YER009W	NTF2	TRUE	0	-0.157328	-0.459803	-0.483492
YDL006W	PTC1	FALSE	0	0.264864	-0.34563	-0.483129
YDL090C	RAM1	FALSE	0	0.399698	-0.25609	-0.483087
YOL144W	NOP8	TRUE	0	0.322874	-0.290532	-0.481098
YPL161C	BEM4	FALSE	0	-0.0299009	-0.119032	-0.480994
YLR422W	DCK1	FALSE	0	0.159135	0.132916	-0.479566
YKR010C	TOF2	FALSE	0	-0.129694	-0.197389	-0.479463
YBR197C	YBR197C	FALSE	0	-0.308071	-0.451191	-0.479137
YLL005C	SPO75	FALSE	0	-0.279848	-0.29549	-0.478933
YLR015W	BRE2	FALSE	0	-0.161789	-0.248135	-0.478033
YDR325W	YCG1	TRUE	0	0.139339	0.394308	-0.477889
YKL031W	YKL031W	FALSE	0	-0.0637606	-0.717462	-0.4777
YBR025C	OLA1	FALSE	0	0.149863	0.0774305	-0.476764
YMR080C	NAM7	FALSE	0	-0.193454	-0.127526	-0.475279
YOR040W	GLO4	FALSE	0	-0.947979	-0.631569	-0.475114
YKR038C	KAE1	TRUE	0	0.296845	0.4193	-0.474956
YNL238W	KEX2	FALSE	0	-0.241378	-0.391805	-0.474566
YOR216C	RUD3	FALSE	0	-0.196383	-0.373301	-0.474443
YBL041W	PRE7	TRUE	0	-0.480282	-0.403521	-0.474225
YGL203C	KEX1	FALSE	0	0.389344	-0.245382	-0.473543
YJL127C-B	YJL127C-B	FALSE	0	0.0476197	-0.420338	-0.473529
YMR257C	PET111	FALSE	0	-0.0850101	0.0867584	-0.473146
YHR206W	SKN7	FALSE	0	-0.238711	-0.37448	-0.472857
YLR337C	VRP1	FALSE	0	-0.331664	-0.403838	-0.472753
YDR256C	CTA1	FALSE	0	0.314586	-0.287565	-0.472153
YDR440W	DOT1	FALSE	0	-0.26896	-0.386268	-0.472146
YDR497C	ITR1	FALSE	0	0.187837	0.42104	-0.472079
YMR235C	RNA1	TRUE	0	-0.344023	-0.252503	-0.471863
YBR042C	CST26	FALSE	0	-0.342986	0.349587	-0.471021
YOL092W	YPQ1	FALSE	0	0.376076	0.429638	-0.470167
YBL036C	YBL036C	FALSE	0	-0.130998	-0.29711	-0.470124
YMR319C	FET4	FALSE	0	0.33458	0.270655	-0.470105
YHR093W	AHT1	FALSE	0	-0.170794	-0.332165	-0.470067
YBR288C	APM3	FALSE	0	-0.220457	-0.0666925	-0.470054
YOR336W	KRE5	TRUE	0	-0.208224	-0.416075	-0.469674
YKL020C	SPT23	FALSE	0	0.348383	-0.49861	-0.468564
YGR261C	APL6	FALSE	0	-0.425042	-0.443154	-0.468522
YLL021W	SPA2	FALSE	0	-0.0631457	-0.28333	-0.468001
YGL036W	YGL036W	FALSE	0	0.129622	-0.354999	-0.467831
YPL120W	VPS30	FALSE	0	0.345189	0.374529	-0.467651
YKL012W	PRP40	TRUE	0	-0.356722	-0.213968	-0.467309
YDL060W	TSR1	TRUE	0	0.371195	0.397896	-0.467116
YMR250W	GAD1	FALSE	0	-0.203367	-0.266987	-0.466831
YGL107C	RMD9	FALSE	0	0.308728	-0.272623	-0.46661
YGL044C	RNA15	TRUE	0	-0.262882	0.316102	-0.466265
YPR189W	SKI3	FALSE	0	-0.330514	0.444016	-0.465519
YGR277C	CAB4	TRUE	0	0.155407	-0.456336	-0.465394
YDR051C	DET1	FALSE	0	-0.151778	-0.581997	-0.464868
YGR174C	CBP4	FALSE	0	-0.491748	-0.539473	-0.464375
YLL015W	BPT1	FALSE	0	0.27968	0.485823	-0.464259
YOR298C-A	MBF1	FALSE	0	0.0103498	-0.260744	-0.463717
YLR284C	ECI1	FALSE	0	0.284962	0.266752	-0.462896
YDR042C	YDR042C	FALSE	0	0.192095	-0.226615	-0.462834
YBL104C	SEA4	FALSE	0	-0.376419	0.359813	-0.461696
YLL050C	COF1	TRUE	0	-0.172447	-0.0990865	-0.460753
YHR151C	MTC6	FALSE	0	-0.271775	-0.104057	-0.460741
YNR009W	NRM1	FALSE	0	-0.187302	-0.332175	-0.460283
YEL040W	UTR2	FALSE	0	0.437997	0.340514	-0.460193
YER083C	GET2	FALSE	0	-0.156766	-0.432611	-0.459157
YJR107W	LIH1	FALSE	0	0.152095	-0.315707	-0.458866
YHL019C	APM2	FALSE	0	-0.192977	-0.615473	-0.458768
YBR261C	TAE1	FALSE	0	0.172585	0.217923	-0.457002
YDR018C	YDR018C	FALSE	0	-0.119838	0.239873	-0.456153
YGR266W	YGR266W	FALSE	0	-0.327187	-0.602128	-0.454867
YPR111W	DBF20	FALSE	0	-0.134134	-0.254664	-0.454833
YKL116C	PRR1	FALSE	0	-0.3058	-0.315009	-0.453297
YMR160W	YMR160W	FALSE	0	-0.404117	0.42447	-0.453282
YJR121W	ATP2	FALSE	0	-0.422566	-0.153017	-0.452243
YBR235W	VHC1	FALSE	0	0.32216	0.27838	-0.451936
YNL225C	CNM67	FALSE	0	-0.152816	-0.0850547	-0.451586
YFR012W-A	YFR012W-A	FALSE	0	0.0484351	-0.242574	-0.451296
YHR115C	DMA1	FALSE	0	-0.288754	0.24034	-0.451039
YKL069W	YKL069W	FALSE	0	-0.0475802	-0.305936	-0.45089
YOR237W	HES1	FALSE	0	0.521978	0.238058	-0.450298
YOR235W	IRC13	FALSE	0	-0.283923	-0.445671	-0.448862
YER144C	UBP5	FALSE	0	0.0752887	-0.42582	-0.44849
YGL124C	MON1	FALSE	0	0.106188	-0.104994	-0.448475
YLL048C	YBT1	FALSE	0	-0.171593	-0.182257	-0.4478
YOL141W	PPM2	FALSE	0	0.286891	-0.222132	-0.447766
YML092C	PRE8	TRUE	0	0.259422	-0.180365	-0.447698
YLR427W	MAG2	FALSE	0	-0.406129	0.54315	-0.447461
YFR044C	DUG1	FALSE	0	0.292263	-0.286521	-0.447326
YDR506C	GMC1	FALSE	0	0.265686	-0.494465	-0.446898
YHR140W	YHR140W	FALSE	0	-0.167766	-0.23096	-0.446811
YKL135C	APL2	FALSE	0	-0.206227	-0.181319	-0.446088
YJR109C	CPA2	FALSE	0	0.292944	0.492465	-0.44585
YDR516C	EMI2	FALSE	0	0.299175	0.164552	-0.445742
YKL092C	BUD2	FALSE	0	-0.316452	0.559212	-0.445125
YNL064C	YDJ1	FALSE	0	-0.31494	-0.464766	-0.444984
YPR034W	ARP7	TRUE	0	-0.334805	-0.844412	-0.444006
YKL034W	TUL1	FALSE	0	-0.469231	-0.509603	-0.443345
YLR433C	CNA1	FALSE	0	-0.307362	-0.264686	-0.443213
YDL035C	GPR1	FALSE	0	-0.302764	-0.363135	-0.442931
YMR259C	TRM732	FALSE	0	-0.397532	0.338914	-0.442808
YOR316C	COT1	FALSE	0	0.242357	-0.163074	-0.44241
YMR014W	BUD22	FALSE	0	0.14909	0.269017	-0.442409
YPR182W	SMX3	TRUE	0	-0.186801	-0.47508	-0.442264
YGL071W	AFT1	FALSE	0	-0.504169	-0.143321	-0.441539
YHR201C	PPX1	FALSE	0	0.37543	-0.38291	-0.441513
YHR120W	MSH1	FALSE	0	-0.0383216	-0.185921	-0.440741
YNL055C	POR1	FALSE	0	0.162693	-0.371686	-0.440668
YMR280C	CAT8	FALSE	0	-0.135735	-0.284491	-0.440484
YGR116W	SPT6	TRUE	0	-0.718505	-0.933381	-0.439612
YBR139W	YBR139W	FALSE	0	-0.153664	-0.513489	-0.439317
YLR021W	IRC25	FALSE	0	-0.333976	-0.460443	-0.438759
YLR306W	UBC12	FALSE	0	0.196563	0.39211	-0.438629
YNL041C	COG6	FALSE	0	0.3494	-0.378761	-0.438084
YDR304C	CPR5	FALSE	0	-0.205818	-0.607517	-0.43753
YKR003W	OSH6	FALSE	0	0.174854	0.30295	-0.437077
YMR295C	YMR295C	FALSE	0	-0.106177	-0.29337	-0.437073
YFR052W	RPN12	TRUE	0	-0.164658	-0.223243	-0.436632
YDR462W	MRPL28	FALSE	0	-0.0960185	-0.298603	-0.435547
YJR129C	EFM3	FALSE	0	-0.496159	-0.0935706	-0.435284
YJL219W	HXT9	FALSE	0	0.37489	-0.231952	-0.435238
YDL078C	MDH3	FALSE	0	0.28002	-0.260901	-0.434799
YOL116W	MSN1	FALSE	0	-0.100028	-0.0643865	-0.434752
YLR116W	MSL5	TRUE	0	0.219515	0.247089	-0.434169
YGL202W	ARO8	FALSE	0	0.204772	0.121374	-0.433728
YGR227W	DIE2	FALSE	0	0.115467	-0.433947	-0.433407
YLR092W	SUL2	FALSE	0	-0.401361	0.403901	-0.431861
YPR191W	QCR2	FALSE	0	-0.591261	-0.706616	-0.431789
YGL209W	MIG2	FALSE	0	0.143636	0.382591	-0.431453
YDL056W	MBP1	FALSE	0	0.364596	-0.217368	-0.431307
YLR134W	PDC5	FALSE	0	0.229737	0.35508	-0.430613
YKR079C	TRZ1	TRUE	0	0.181219	0.32578	-0.430226
YOL033W	MSE1	FALSE	0	-0.29779	-0.591244	-0.42883
YDL124W	YDL124W	FALSE	0	0.139846	-0.427466	-0.428628
YOL002C	IZH2	FALSE	0	0.225676	-0.303527	-0.42861
YKL039W	PTM1	FALSE	0	-0.27089	-0.35016	-0.428445
YOR011W	AUS1	FALSE	0	-0.45202	-0.337763	-0.428283
YNL222W	SSU72	TRUE	0	-0.297792	-0.365332	-0.427692
YPR113W	PIS1	TRUE	0	0.321053	0.413366	-0.427544
YMR061W	RNA14	TRUE	0	-0.447714	-0.503207	-0.427054
YGL241W	KAP114	FALSE	0	-0.384075	-0.406732	-0.426725
YNL169C	PSD1	FALSE	0	-0.473882	-0.494233	-0.42657
YOR198C	BFR1	FALSE	0	-0.424917	-0.267127	-0.426404
YDL059C	RAD59	FALSE	0	-0.00878206	-0.219684	-0.42485
YAL039C	CYC3	FALSE	0	-0.539313	-0.386363	-0.424452
YJL101C	GSH1	FALSE	0	0.368612	0.748383	-0.424272
YEL066W	HPA3	FALSE	0	-0.358426	-0.167655	-0.423706
YIL091C	UTP25	TRUE	0	-0.211257	-0.232107	-0.423516
YOR311C	DGK1	FALSE	0	0.0673598	-0.418182	-0.423501
YDR035W	ARO3	FALSE	0	-0.29066	-0.512874	-0.423478
YCL005W	LDB16	FALSE	0	-0.173672	-0.329678	-0.422264
YIL077C	YIL077C	FALSE	0	-0.410524	-0.701977	-0.421899
YBR145W	ADH5	FALSE	0	-0.0406768	-0.25848	-0.421845
YDL052C	SLC1	FALSE	0	-0.0878846	-0.299314	-0.421461
YBL063W	KIP1	FALSE	0	0.32044	-0.144874	-0.421389
YNR049C	MSO1	FALSE	0	-0.21867	-0.118299	-0.421236
YDL165W	CDC36	TRUE	0	-0.261819	-0.265403	-0.4205
YIL094C	LYS12	FALSE	0	-0.143762	0.257682	-0.420488
YPL147W	PXA1	FALSE	0	0.260363	-0.287626	-0.419162
YFL030W	AGX1	FALSE	0	-0.0856276	-0.46402	-0.418363
YLR248W	RCK2	FALSE	0	-0.393749	0.267331	-0.417885
YMR309C	NIP1	TRUE	0	-0.151903	-0.599144	-0.41788
YKL058W	TOA2	TRUE	0	-0.108805	-0.213227	-0.417351
YOR174W	MED4	TRUE	0	-0.471186	-0.771064	-0.417258
YCR021C	HSP30	FALSE	0	-0.241238	0.302681	-0.417212
YJR138W	IML1	FALSE	0	-0.237534	-0.609304	-0.417112
YML115C	VAN1	FALSE	0	-0.17689	-0.210686	-0.416868
YOR054C	VHS3	FALSE	0	0.22533	-0.339771	-0.416605
YOL062C	APM4	FALSE	0	0.0797985	-0.383515	-0.416068
YCL057C-A	MIC10	FALSE	0	-0.121601	-0.102996	-0.415696
YNL106C	INP52	FALSE	0	-0.238381	0.225534	-0.414427
YER082C	UTP7	TRUE	0	-0.181797	0.32575	-0.414315
YDR045C	RPC11	TRUE	0	-0.0804382	0.184224	-0.413766
YNL083W	SAL1	FALSE	0	-0.06211	-0.253264	-0.413429
YNL123W	NMA111	FALSE	0	0.279813	-0.449191	-0.413054
YPL025C	YPL025C	FALSE	0	0.288932	-0.225764	-0.412812
YPL092W	SSU1	FALSE	0	-0.488878	-0.410636	-0.412699
YKL145W	RPT1	TRUE	0	-0.221611	-0.258883	-0.411968
YKL046C	DCW1	FALSE	0	0.301851	-0.589938	-0.411655
YGR162W	TIF4631	FALSE	0	0.30637	-0.122864	-0.411546
YMR291W	TDA1	FALSE	0	-0.151367	0.10358	-0.411497
YER059W	PCL6	FALSE	0	0.230246	0.251296	-0.411371
YPL271W	ATP15	FALSE	0	-0.364155	-0.538249	-0.411354
YJR075W	HOC1	FALSE	0	-0.0988178	-0.159371	-0.410943
YBR008C	FLR1	FALSE	0	-0.253081	-0.529494	-0.410775
YDL031W	DBP10	TRUE	0	-0.352146	-0.479921	-0.410372
YIL006W	YIA6	FALSE	0	-0.260121	-0.370871	-0.41
YDL015C	TSC13	TRUE	0	0.0529024	-0.254975	-0.409974
YMR053C	STB2	FALSE	0	-0.309643	-0.399057	-0.409495
YOR091W	TMA46	FALSE	0	0.175148	-0.259418	-0.409293
YDL149W	ATG9	FALSE	0	-0.223914	-0.142885	-0.408752
YOL059W	GPD2	FALSE	0	-0.0930287	-0.195629	-0.408632
YOL133W	HRT1	TRUE	0	-0.0461348	-0.519154	-0.40863
YLR324W	PEX30	FALSE	0	-0.327728	-0.376354	-0.407768
YBR239C	ERT1	FALSE	0	-0.21154	-0.294383	-0.407765
YGR013W	SNU71	TRUE	0	-0.109024	-0.383167	-0.407241
YNR071C	YNR071C	FALSE	0	-0.0327582	-0.116523	-0.406481
YOR233W	KIN4	FALSE	0	-0.22677	-0.471051	-0.405435
YFR034W-A	YFR034W-A	FALSE	0	-0.0166435	-0.372688	-0.405141
YNL115C	YNL115C	FALSE	0	0.19478	0.0841534	-0.402612
YOR190W	SPR1	FALSE	0	0.234229	0.276703	-0.402483
YOR361C	PRT1	TRUE	0	0.272038	0.423811	-0.402459
YER093C	TSC11	TRUE	0	0.262932	0.444851	-0.401803
YJR073C	OPI3	FALSE	0	-0.213331	-0.367586	-0.401011
YNL084C	END3	FALSE	0	-0.0836461	0.00577344	-0.400577
YOR027W	STI1	FALSE	0	-0.226739	-0.409314	-0.400131
YAL003W	EFB1	TRUE	0	0.133357	0.087987	-0.399822
YOR310C	NOP58	TRUE	0	0.332046	0.362909	-0.39975
YPL207W	TYW1	FALSE	0	-0.147737	0.351657	-0.399476
YER019C-A	SBH2	FALSE	0	-0.142828	-0.238834	-0.39929
YOR002W	ALG6	FALSE	0	0.369581	0.430907	-0.398944
YBR223C	TDP1	FALSE	0	-0.360388	0.21287	-0.398286
YML014W	TRM9	FALSE	0	-0.231345	-0.60378	-0.397742
YPL141C	FRK1	FALSE	0	0.211528	0.262385	-0.397115
YLR310C	CDC25	TRUE	0	0.132778	0.263047	-0.39707
YCR036W	RBK1	FALSE	0	0.355963	0.28611	-0.396727
YPR066W	UBA3	FALSE	0	0.283718	0.250683	-0.396678
YOR006C	TSR3	FALSE	0	0.293232	-0.241701	-0.395894
YPL027W	SMA1	FALSE	0	-0.192738	-0.0433713	-0.395816
YMR006C	PLB2	FALSE	0	0.338973	0.527675	-0.395486
YJL162C	JJJ2	FALSE	0	-0.254552	-0.0610948	-0.395075
YHR038W	RRF1	FALSE	0	0.344006	0.0635406	-0.394553
YDR329C	PEX3	FALSE	0	0.283632	0.509637	-0.394136
YDL026W	YDL026W	FALSE	0	-0.17754	-0.254993	-0.393942
YIL107C	PFK26	FALSE	0	-0.328386	-0.148952	-0.393864
YJL166W	QCR8	FALSE	0	-0.562193	-0.301503	-0.393539
YGL236C	MTO1	FALSE	0	-0.274378	0.305868	-0.393483
YLR298C	YHC1	TRUE	0	-0.0350344	-0.194962	-0.393067
YDL197C	ASF2	FALSE	0	-0.011498	-0.365797	-0.39268
YNR014W	YNR014W	FALSE	0	0.0571514	-0.00279339	-0.392205
YAL054C	ACS1	FALSE	0	-0.300977	-0.604911	-0.391783
YGR112W	SHY1	FALSE	0	-0.137834	0.311789	-0.3911
YPR047W	MSF1	FALSE	0	0.229759	-0.5246	-0.390453
YOR206W	NOC2	TRUE	0	-0.342331	0.0704383	-0.390426
YEL029C	BUD16	FALSE	0	0.345311	-0.0394454	-0.390385
YAR035W	YAT1	FALSE	0	-0.33521	-0.48399	-0.389169
YKR053C	YSR3	FALSE	0	-0.210922	-0.204235	-0.387601
YKR066C	CCP1	FALSE	0	0.0958206	-0.214309	-0.387499
YJR030C	RBH2	FALSE	0	0.310458	0.195487	-0.386922
YER008C	SEC3	TRUE	0	-0.372551	0.43981	-0.386407
YBR002C	RER2	TRUE	0	-0.18522	-0.49196	-0.385503
YLR395C	COX8	FALSE	0	-0.0492938	0.197692	-0.385426
YLR127C	APC2	TRUE	0	0.348149	-0.470311	-0.385208
YNL027W	CRZ1	FALSE	0	-0.200466	0.243303	-0.385198
YOL113W	SKM1	FALSE	0	-0.17535	-0.0286919	-0.384429
YGR041W	BUD9	FALSE	0	-0.268089	-0.269533	-0.384375
YOR076C	SKI7	FALSE	0	-0.344436	-0.357287	-0.383377
YNR065C	YNR065C	FALSE	0	0.37186	0.478596	-0.381912
YFL024C	EPL1	TRUE	0	0.256957	0.203925	-0.381715
YGL006W	PMC1	FALSE	0	-0.430781	0.531666	-0.381259
YLR309C	IMH1	FALSE	0	-0.257503	-0.276464	-0.38088
YFL026W	STE2	FALSE	0	-0.102147	-0.197461	-0.380655
YPL074W	YTA6	FALSE	0	-0.427426	-0.691221	-0.380439
YNL188W	KAR1	TRUE	0	0.00696355	-0.179639	-0.380296
YPL214C	THI6	FALSE	0	-0.425522	0.52942	-0.379348
YER147C	SCC4	TRUE	0	0.143751	0.135037	-0.378686
YLR361C-A	YLR361C-A	FALSE	0	-0.326072	-0.462313	-0.37862
YNR047W	FPK1	FALSE	0	-0.0862618	-0.288211	-0.378184
YLR139C	SLS1	FALSE	0	-0.26833	-0.460565	-0.377032
YJR072C	NPA3	TRUE	0	0.227328	-0.381009	-0.376934
YKL166C	TPK3	FALSE	0	-0.16534	-0.231945	-0.376615
YKL120W	OAC1	FALSE	0	-0.356881	-0.406176	-0.37624
YOR095C	RKI1	TRUE	0	-0.02892	0.0253819	-0.375857
YBR192W	RIM2	TRUE	0	0.39216	-0.346399	-0.375778
YKL150W	MCR1	FALSE	0	-0.0897651	-0.250913	-0.375772
YJR038C	YJR038C	FALSE	0	-0.457146	-0.48866	-0.375613
YBL084C	CDC27	TRUE	0	-0.279627	-0.664852	-0.374617
YOL115W	PAP2	FALSE	0	-0.418682	-0.512352	-0.374202
YPL089C	RLM1	FALSE	0	-0.230828	0.544728	-0.373695
YJR007W	SUI2	TRUE	0	-0.196472	0.285539	-0.373678
YNL010W	YNL010W	FALSE	0	-0.0271751	-0.262907	-0.373396
YBR114W	RAD16	FALSE	0	-0.177085	0.30964	-0.372596
YJR074W	MOG1	FALSE	0	-0.167485	0.377693	-0.372574
YGR003W	CUL3	FALSE	0	-0.277965	-0.488241	-0.372218
YEL018W	EAF5	FALSE	0	-0.400315	0.107621	-0.371947
YLR117C	CLF1	TRUE	0	-0.29374	0.189173	-0.371906
YPL146C	NOP53	TRUE	0	0.12546	-0.247001	-0.371716
YER056C	FCY2	FALSE	0	-0.210661	0.134741	-0.371643
YDR150W	NUM1	FALSE	0	0.191352	0.358775	-0.371523
YML041C	VPS71	FALSE	0	-0.018135	-0.25766	-0.371315
YHR153C	SPO16	FALSE	0	-0.226857	-0.381219	-0.371046
YGR017W	YGR017W	FALSE	0	-0.176305	-0.280721	-0.370896
YNL047C	SLM2	FALSE	0	-0.104672	-0.0995937	-0.37072
YNL091W	NST1	FALSE	0	0.113704	-0.0334621	-0.370371
YNL037C	IDH1	FALSE	0	-0.503276	-0.400036	-0.369668
YDR106W	ARP10	FALSE	0	0.0461257	0.059396	-0.369612
YDR222W	YDR222W	FALSE	0	-0.232868	-0.202019	-0.369469
YBR043C	QDR3	FALSE	0	0.214947	-0.242917	-0.369289
YJL128C	PBS2	FALSE	0	-0.0915023	-0.428261	-0.368837
YIL041W	GVP36	FALSE	0	0.144598	0.23454	-0.368833
YKR064W	OAF3	FALSE	0	-0.493893	-0.201453	-0.368675
YPL194W	DDC1	FALSE	0	0.0733797	0.242752	-0.368574
YHR078W	YHR078W	FALSE	0	0.0772472	-0.168122	-0.366773
YDR450W	RPS18A	FALSE	0	0.156848	-0.55828	-0.366469
YNL006W	LST8	TRUE	0	0.336284	-0.324584	-0.366064
YNL233W	BNI4	FALSE	0	0.183878	0.289022	-0.365498
YBR135W	CKS1	TRUE	0	-0.597856	-0.806453	-0.365311
YLR146C	SPE4	FALSE	0	0.287374	-0.459549	-0.365217
YGL017W	ATE1	FALSE	0	0.408276	0.270073	-0.365185
YIR032C	DAL3	FALSE	0	0.117743	0.281163	-0.365184
YLR085C	ARP6	FALSE	0	0.495111	-0.429562	-0.364449
YOL139C	CDC33	TRUE	0	-0.266154	0.177528	-0.363961
YOR132W	VPS17	FALSE	0	0.460327	-0.398634	-0.363534
YKL010C	UFD4	FALSE	0	0.354175	-0.178505	-0.363505
YDR109C	YDR109C	FALSE	0	0.366805	0.501998	-0.363254
YKL197C	PEX1	FALSE	0	-0.430946	0.344647	-0.362715
YPR042C	PUF2	FALSE	0	0.31534	-0.732378	-0.362601
YLR167W	RPS31	TRUE	0	-0.45553	-0.485932	-0.362523
YLR452C	SST2	FALSE	0	-0.249237	0.0329553	-0.362364
YNL056W	OCA2	FALSE	0	-0.157966	0.143713	-0.361708
YER076C	YER076C	FALSE	0	0.328306	0.583597	-0.361521
YOR145C	PNO1	TRUE	0	-0.346887	-0.55051	-0.361508
YIL074C	SER33	FALSE	0	-0.510595	-0.238623	-0.361351
YJL015C	YJL015C	TRUE	0	0.104299	-0.198159	-0.361154
YGL059W	PKP2	FALSE	0	-0.115907	-0.226405	-0.360788
YLR375W	STP3	FALSE	0	-0.379382	0.09853	-0.360734
YGR278W	CWC22	TRUE	0	-0.165238	0.321314	-0.360679
YGL061C	DUO1	TRUE	0	0.0798933	0.174173	-0.36041
YLR260W	LCB5	FALSE	0	0.299327	0.266098	-0.360183
YDR539W	FDC1	FALSE	0	0.353511	-0.464656	-0.360116
YBR240C	THI2	FALSE	0	0.289807	-0.242264	-0.358654
YDR459C	PFA5	FALSE	0	0.216294	0.171899	-0.357485
YOL152W	FRE7	FALSE	0	0.245685	0.151565	-0.357335
YML006C	GIS4	FALSE	0	-0.550121	-0.261335	-0.356789
YDL207W	GLE1	TRUE	0	-0.254749	-0.147284	-0.35533
YPL017C	IRC15	FALSE	0	-0.274656	-0.297264	-0.355256
YBR125C	PTC4	FALSE	0	0.212479	0.287067	-0.354897
YLR451W	LEU3	FALSE	0	-0.677046	-0.626855	-0.354387
YLR201C	COQ9	FALSE	0	-0.0179835	-0.324698	-0.354271
YGR056W	RSC1	FALSE	0	0.250491	0.327029	-0.354218
YBR260C	RGD1	FALSE	0	-0.153346	-0.537581	-0.354112
YPR137W	RRP9	TRUE	0	-0.344848	-0.433863	-0.354012
YNL007C	SIS1	TRUE	0	0.302675	-0.25404	-0.35348
YLR202C	YLR202C	FALSE	0	-0.373885	-0.209271	-0.352986
YDR525W	API2	FALSE	0	-0.326586	-0.10581	-0.352981
YMR098C	ATP25	FALSE	0	-0.356177	-0.0668226	-0.352823
YGL246C	RAI1	FALSE	0	0.142398	-0.254316	-0.352801
YOL162W	YOL162W	FALSE	0	0.262909	-0.330707	-0.352439
YDR372C	VPS74	FALSE	0	-0.2243	-0.327672	-0.352011
YBR231C	SWC5	FALSE	0	0.0895946	-0.301523	-0.350979
YML038C	YMD8	FALSE	0	-0.110866	0.257319	-0.350702
YEL022W	GEA2	FALSE	0	-0.419722	-0.202337	-0.350509
YKL051W	SFK1	FALSE	0	-0.0331135	-0.0563958	-0.349586
YPR018W	RLF2	FALSE	0	-0.191222	-0.249879	-0.349163
YKL110C	KTI12	FALSE	0	0.248038	0.173458	-0.346689
YOL006C	TOP1	FALSE	0	-0.262241	0.168981	-0.34543
YNL158W	PGA1	TRUE	0	0.0253495	-0.167746	-0.344688
YHR104W	GRE3	FALSE	0	-0.278227	-0.194767	-0.341988
YKR015C	YKR015C	FALSE	0	-0.262305	0.226509	-0.341442
YNL180C	RHO5	FALSE	0	-0.0386733	0.27414	-0.340053
YGR183C	QCR9	FALSE	0	0.168313	0.198247	-0.339874
YNL277W	MET2	FALSE	0	-0.252023	-0.277669	-0.339075
YGR186W	TFG1	TRUE	0	0.130343	-0.247202	-0.339068
YBL066C	SEF1	FALSE	0	-0.332033	0.333697	-0.338607
YDR393W	SHE9	FALSE	0	0.157441	-0.119198	-0.338238
YDL200C	MGT1	FALSE	0	-0.189526	-0.433182	-0.337737
YPL131W	RPL5	TRUE	0	-0.193127	0.359991	-0.337204
YKL148C	SDH1	FALSE	0	0.1802	-0.269197	-0.336467
YLR011W	LOT6	FALSE	0	-0.0849373	0.102235	-0.336271
YOL064C	MET22	FALSE	0	-0.336758	-0.318864	-0.336221
YOR119C	RIO1	TRUE	0	0.206535	-0.182431	-0.336167
YLR002C	NOC3	TRUE	0	-0.477519	-0.451329	-0.335409
YDR381C-A	YDR381C-A	FALSE	0	0.0570753	-0.132616	-0.335078
YIL039W	TED1	FALSE	0	-0.214044	0.394259	-0.334892
YNL293W	MSB3	FALSE	0	0.291821	0.363159	-0.334523
YOL117W	RRI2	FALSE	0	-0.311918	0.231575	-0.333586
YDL160C	DHH1	FALSE	0	-0.23547	-0.34486	-0.333428
YBR021W	FUR4	FALSE	0	-0.182158	0.287135	-0.332503
YLR390W-A	CCW14	FALSE	0	0.378752	0.61422	-0.332254
YNL182C	IPI3	TRUE	0	-0.203404	-0.261286	-0.332157
YKL220C	FRE2	FALSE	0	0.325192	-0.18193	-0.331836
YBL032W	HEK2	FALSE	0	0.00202783	-0.479087	-0.331249
YNL143C	YNL143C	FALSE	0	0.305668	-0.663424	-0.331033
YDL214C	PRR2	FALSE	0	-0.273121	-0.200791	-0.330627
YDR472W	TRS31	TRUE	0	-0.132051	-0.422305	-0.33002
YGL027C	CWH41	FALSE	0	0.246682	-0.231898	-0.329982
YLR414C	PUN1	FALSE	0	-0.31758	-0.63	-0.329019
YOL089C	HAL9	FALSE	0	0.0786026	-0.206075	-0.328864
YJL172W	CPS1	FALSE	0	0.281483	-0.113747	-0.328533
YMR054W	STV1	FALSE	0	0.301451	0.256857	-0.32766
YBR030W	RKM3	FALSE	0	-0.110664	-0.393925	-0.327081
YHR030C	SLT2	FALSE	0	-0.13648	-0.379724	-0.3268
YOR035C	SHE4	FALSE	0	-0.289166	0.507622	-0.326594
YCR015C	CTO1	FALSE	0	-0.228112	-0.135441	-0.326013
YJR017C	ESS1	TRUE	0	-0.117876	0.274056	-0.325907
YCR061W	YCR061W	FALSE	0	0.378605	-0.244892	-0.325383
YKL189W	HYM1	TRUE	0	-0.00475789	-0.170473	-0.325082
YLR141W	RRN5	TRUE	0	-0.348203	-0.679843	-0.324515
YKL098W	MTC2	FALSE	0	-0.149868	-0.169601	-0.323062
YDL001W	RMD1	FALSE	0	0.215009	-0.171324	-0.322727
YEL030W	ECM10	FALSE	0	0.291357	-0.280993	-0.322204
YOL054W	PSH1	FALSE	0	0.148555	0.306278	-0.321823
YFL031W	HAC1	FALSE	0	0.183427	-0.337854	-0.321603
YER165W	PAB1	TRUE	0	-0.220042	-0.403547	-0.320929
YJR140C	HIR3	FALSE	0	0.417274	-0.240014	-0.320843
YOL151W	GRE2	FALSE	0	0.194882	-0.467688	-0.320662
YGL018C	JAC1	TRUE	0	0.425152	0.059112	-0.32042
YMR182C	RGM1	FALSE	0	-0.301069	-0.23349	-0.319481
YBL064C	PRX1	FALSE	0	0.00451657	-0.173527	-0.318875
YMR023C	MSS1	FALSE	0	-0.207811	-0.158516	-0.318482
YDL142C	CRD1	FALSE	0	-0.117215	-0.162802	-0.318148
YMR069W	NAT4	FALSE	0	-0.257382	0.182738	-0.317694
YLR307W	CDA1	FALSE	0	-0.154073	-0.0330918	-0.317512
YDL042C	SIR2	FALSE	0	0.0147908	-0.152978	-0.31722
YHR028W-A	YHR028W-A	FALSE	0	-0.206773	-0.342922	-0.317146
YGL249W	ZIP2	FALSE	0	-0.115408	0.0910183	-0.31626
YJR093C	FIP1	TRUE	0	0.174905	-0.146009	-0.316128
YMR086W	SEG1	FALSE	0	0.267527	0.353895	-0.31599
YOR130C	ORT1	FALSE	0	-0.0933626	-0.218927	-0.315976
YML054C-A	YML054C-A	FALSE	0	-0.381647	-0.423027	-0.315424
YBR007C	DSF2	FALSE	0	0.0781214	-0.171615	-0.314893
YPL155C	KIP2	FALSE	0	0.310176	0.286992	-0.314716
YIL052C	RPL34B	FALSE	0	0.221679	0.227274	-0.31447
YBR241C	YBR241C	FALSE	0	-0.20443	-0.269786	-0.314453
YLR274W	MCM5	TRUE	0	-0.396784	-0.710769	-0.314243
YLR353W	BUD8	FALSE	0	0.353934	-0.144214	-0.314045
YCR020C-A	MAK31	FALSE	0	-0.169688	-0.329835	-0.313779
YDR169C	STB3	FALSE	0	-0.294489	-0.433914	-0.313432
YJL088W	ARG3	FALSE	0	-0.278303	-0.124537	-0.312998
YLL057C	JLP1	FALSE	0	-0.214096	0.311315	-0.312643
YMR018W	PEX9	FALSE	0	0.133997	-0.277351	-0.312275
YNR070W	PDR18	FALSE	0	0.177795	0.463193	-0.312245
YML118W	NGL3	FALSE	0	0.36086	0.184573	-0.31196
YDR364C	CDC40	FALSE	0	-0.226285	0.172117	-0.311443
YDR089W	VTC5	FALSE	0	-0.0754954	0.345775	-0.311428
YIR038C	GTT1	FALSE	0	0.32118	0.249795	-0.311049
YJR005W	APL1	FALSE	0	-0.155357	-0.0728377	-0.310913
YHR004C	NEM1	FALSE	0	0.133424	-0.441745	-0.309989
YMR090W	YMR090W	FALSE	0	0.290488	-0.663191	-0.309742
YPR194C	OPT2	FALSE	0	0.257082	0.497678	-0.309451
YDR314C	RAD34	FALSE	0	-0.178103	-0.198416	-0.308921
YOL127W	RPL25	TRUE	0	-0.0780348	-0.0945923	-0.30879
YAL002W	VPS8	FALSE	0	-0.151396	-0.433018	-0.308658
YLL019C	KNS1	FALSE	0	-0.313828	0.379817	-0.308467
YGR002C	SWC4	TRUE	0	-0.11421	-0.295204	-0.308451
YDL085W	NDE2	FALSE	0	-0.0601286	0.203435	-0.308378
YPL203W	TPK2	FALSE	0	-0.366972	-0.617815	-0.30792
YHR096C	HXT5	FALSE	0	0.425445	0.363716	-0.307827
YDL148C	NOP14	TRUE	0	0.24212	-0.110259	-0.30706
YNL038W	GPI15	TRUE	0	-0.0292555	-0.172598	-0.306618
YDR293C	SSD1	FALSE	0	0.33849	0.559167	-0.306584
YIL099W	SGA1	FALSE	0	-0.372335	0.45984	-0.306169
YGL216W	KIP3	FALSE	0	-0.397829	0.375366	-0.305906
YJL041W	NSP1	TRUE	0	0.323702	-0.173387	-0.305844
YJR021C	REC107	FALSE	0	0.501029	0.242699	-0.305679
YFR009W	GCN20	FALSE	0	0.105794	-0.254329	-0.30556
YDR477W	SNF1	FALSE	0	0.240173	-0.915499	-0.305052
YDR363W-A	SEM1	FALSE	0	-0.0669403	-0.192916	-0.304212
YJR033C	RAV1	FALSE	0	0.216022	0.171791	-0.304014
YHL023C	NPR3	FALSE	0	-0.0787693	-0.229735	-0.303938
YPL055C	LGE1	FALSE	0	-0.262337	-0.192982	-0.303887
YLR056W	ERG3	FALSE	0	-0.125466	0.0746879	-0.303713
YHR050W	SMF2	FALSE	0	-0.298712	-0.44145	-0.303531
YGR170W	PSD2	FALSE	0	-0.229572	-0.207215	-0.303137
YNR027W	BUD17	FALSE	0	-0.237863	-0.203796	-0.302895
YKL015W	PUT3	FALSE	0	0.365613	0.328507	-0.302083
YKR006C	MRPL13	FALSE	0	-0.295785	-0.35337	-0.301342
YIL156W	UBP7	FALSE	0	-0.301881	-0.374433	-0.301086
YOR243C	PUS7	FALSE	0	-0.0771283	-0.46069	-0.300575
YPR092W	YPR092W	FALSE	0	-0.194523	0.0814289	-0.299692
YHR067W	HTD2	FALSE	0	-0.181595	-0.0522238	-0.299527
YDR502C	SAM2	FALSE	0	-0.0508129	0.210749	-0.299278
YBR085W	AAC3	FALSE	0	-0.158568	-0.289269	-0.298731
YBR162C	TOS1	FALSE	0	0.0239264	-0.323272	-0.298607
YOR307C	SLY41	FALSE	0	0.192571	0.189725	-0.298579
YDR289C	RTT103	FALSE	0	-0.480606	-0.40513	-0.297923
YLR325C	RPL38	FALSE	0	0.132356	0.293389	-0.29773
YBR284W	YBR284W	FALSE	0	0.113301	0.285832	-0.297352
YFR005C	SAD1	TRUE	0	0.161208	-0.356834	-0.29668
YKR055W	RHO4	FALSE	0	-0.0144558	0.0622611	-0.296673
YBR271W	EFM2	FALSE	0	0.0970898	-0.175012	-0.296641
YBR005W	RCR1	FALSE	0	0.248858	-0.106701	-0.296075
YGR286C	BIO2	FALSE	0	-0.196788	-0.120024	-0.295674
YPL195W	APL5	FALSE	0	0.45546	0.318347	-0.295119
YPR114W	YPR114W	FALSE	0	-0.151488	-0.243322	-0.295049
YML072C	TCB3	FALSE	0	0.486244	0.443097	-0.294592
YNL176C	TDA7	FALSE	0	-0.311938	-0.199611	-0.294067
YEL006W	YEA6	FALSE	0	-0.203054	0.259178	-0.293497
YPL265W	DIP5	FALSE	0	0.313733	0.257675	-0.292671
YOL123W	HRP1	TRUE	0	-0.304033	-0.239567	-0.292445
YLR095C	IOC2	FALSE	0	0.0596038	-0.0860029	-0.292241
YOR267C	HRK1	FALSE	0	0.317078	0.290912	-0.292224
YJR103W	URA8	FALSE	0	-0.213783	0.22645	-0.291696
YGR132C	PHB1	FALSE	0	-0.119422	-0.118477	-0.291461
YPL085W	SEC16	TRUE	0	-0.173001	-0.101504	-0.291436
YDR520C	URC2	FALSE	0	0.063916	-0.286571	-0.290979
YML100W-A	YML100W-A	FALSE	0	-0.145776	-0.251619	-0.29083
YNL035C	YNL035C	FALSE	0	-0.0899636	-0.474782	-0.290563
YNL306W	MRPS18	TRUE	0	0.190779	-0.351159	-0.289801
YJR040W	GEF1	FALSE	0	-0.498272	-0.524494	-0.288791
YKL108W	SLD2	TRUE	0	-0.329808	-0.201937	-0.288495
YML130C	ERO1	TRUE	0	0.171037	-0.313778	-0.288494
YPR106W	ISR1	FALSE	0	0.0509778	-0.0187991	-0.288151
YPL168W	MRX4	FALSE	0	-0.198703	-0.362008	-0.288046
YKL085W	MDH1	FALSE	0	0.225986	0.172351	-0.288014
YIL042C	PKP1	FALSE	0	0.353089	0.132122	-0.287177
YJR048W	CYC1	FALSE	0	0.12463	-0.15797	-0.286223
YBL068W	PRS4	FALSE	0	-0.204377	0.256223	-0.286004
YHR170W	NMD3	TRUE	0	0.328415	-0.329297	-0.285957
YDR116C	MRPL1	FALSE	0	0.172526	0.302428	-0.285691
YPL169C	MEX67	TRUE	0	0.278287	0.337552	-0.285244
YHR082C	KSP1	FALSE	0	-0.117855	0.14062	-0.284929
YDL235C	YPD1	TRUE	0	-0.519653	-0.519705	-0.284738
YMR218C	TRS130	TRUE	0	0.0870441	-0.241364	-0.284663
YER182W	FMP10	FALSE	0	-0.256282	-0.585027	-0.284635
YDL020C	RPN4	FALSE	0	-0.209284	-0.0764775	-0.284454
YFL052W	ZNF1	FALSE	0	-0.150484	0.20909	-0.284336
YLR077W	FMP25	FALSE	0	-0.240263	0.114877	-0.284211
YIL098C	FMC1	FALSE	0	0.204876	0.381815	-0.28381
YCL044C	MGR1	FALSE	0	-0.194607	-0.467817	-0.28333
YBR034C	HMT1	FALSE	0	0.245714	0.232045	-0.282821
YER176W	ECM32	FALSE	0	0.138982	0.245629	-0.282805
YNL166C	BNI5	FALSE	0	-0.247844	-0.329206	-0.28259
YJR120W	YJR120W	FALSE	0	-0.321167	-0.434265	-0.282562
YMR270C	RRN9	TRUE	0	0.289097	-0.155012	-0.280903
YER151C	UBP3	FALSE	0	-0.115979	-0.254975	-0.280044
YMR282C	AEP2	FALSE	0	-0.268263	0.273432	-0.278692
YMR225C	MRPL44	FALSE	0	-0.15756	-0.349506	-0.278639
YOR122C	PFY1	TRUE	0	0.138904	-0.129549	-0.278517
YIL135C	VHS2	FALSE	0	-0.0855675	-0.273155	-0.278468
YFL034C-A	RPL22B	FALSE	0	-0.217961	0.0143307	-0.278389
YPR095C	SYT1	FALSE	0	0.0363805	-0.20237	-0.27757
YJL066C	MPM1	FALSE	0	-0.11245	-0.310935	-0.277227
YMR151W	YIM2	FALSE	0	-0.0986695	-0.238346	-0.275402
YKR027W	BCH2	FALSE	0	0.051331	0.233324	-0.274718
YCR051W	YCR051W	FALSE	0	0.220117	-0.224452	-0.274291
YCL076W	YCL076W	FALSE	0	-0.278282	-0.200901	-0.274052
YOR343C	YOR343C	FALSE	0	-0.325775	-0.119372	-0.274035
YBL004W	UTP20	TRUE	0	-0.556873	-0.412747	-0.274031
YIL001W	YIL001W	FALSE	0	-0.0163669	-0.169679	-0.273863
YDR540C	IRC4	FALSE	0	-0.272139	-0.238721	-0.273508
YBR215W	HPC2	FALSE	0	0.0184533	0.361392	-0.273348
YJL121C	RPE1	FALSE	0	0.227842	0.0954027	-0.273179
YOR043W	WHI2	FALSE	0	-0.180377	-0.210124	-0.272746
YBL065W	YBL065W	FALSE	0	0.170022	-0.50966	-0.272595
YOR171C	LCB4	FALSE	0	0.065004	-0.257063	-0.272132
YML073C	RPL6A	FALSE	0	0.0594982	-0.352815	-0.271405
YER020W	GPA2	FALSE	0	-0.19904	0.249991	-0.271359
YAL020C	ATS1	FALSE	0	0.10713	-0.137992	-0.27103
YNL065W	AQR1	FALSE	0	-0.177053	-0.329774	-0.270985
YJL078C	PRY3	FALSE	0	-0.107936	0.0742781	-0.269755
YJL204C	RCY1	FALSE	0	0.0643924	-0.324074	-0.269701
YGR053C	YGR053C	FALSE	0	0.115236	0.0636427	-0.268852
YJL025W	RRN7	TRUE	0	-0.345568	0.24715	-0.268443
YNL305C	BXI1	FALSE	0	0.111706	-0.110378	-0.267996
YKR070W	YKR070W	FALSE	0	0.00845374	-0.130249	-0.267906
YGR031W	IMO32	FALSE	0	-0.237112	-0.157995	-0.267472
YJR062C	NTA1	FALSE	0	0.334006	-0.276537	-0.267174
YBR148W	YSW1	FALSE	0	0.27018	-0.294789	-0.266589
YOR202W	HIS3	FALSE	0	-0.147577	-0.43102	-0.266278
YJR134C	SGM1	FALSE	0	0.415276	0.438739	-0.26346
YHR178W	STB5	FALSE	0	-0.0639555	0.325678	-0.262171
YDR175C	RSM24	FALSE	0	-0.0966775	-0.248984	-0.26214
YHR183W	GND1	FALSE	0	-0.134168	-0.296083	-0.261935
YCL035C	GRX1	FALSE	0	0.0096058	-0.142517	-0.261618
YIL132C	CSM2	FALSE	0	0.141798	-0.156801	-0.261375
YIL028W	YIL028W	FALSE	0	-0.425379	-0.341899	-0.260979
YHR009C	TDA3	FALSE	0	0.112815	-0.220176	-0.260871
YBL060W	YEL1	FALSE	0	0.169909	0.231389	-0.260163
YPR147C	YPR147C	FALSE	0	-0.0783863	-0.0685966	-0.259745
YNR069C	BSC5	FALSE	0	-0.198898	-0.0158515	-0.259243
YJL155C	FBP26	FALSE	0	0.143295	0.115373	-0.259176
YMR209C	YMR209C	FALSE	0	-0.226326	-0.176519	-0.259043
YOR386W	PHR1	FALSE	0	-0.283005	-0.557602	-0.258669
YGL154C	LYS5	FALSE	0	-0.0647911	0.21478	-0.257798
YPL202C	AFT2	FALSE	0	-0.0399474	-0.0398211	-0.257545
YGR117C	YGR117C	FALSE	0	-0.0730141	0.161918	-0.257352
YDR131C	YDR131C	FALSE	0	0.247761	-0.29622	-0.257169
YDL004W	ATP16	TRUE	0	-0.0668209	-0.433554	-0.256064
YBR058C	UBP14	FALSE	0	-0.113955	-0.172631	-0.255431
YNL311C	SKP2	FALSE	0	0.0486972	0.0921275	-0.255418
YGL213C	SKI8	FALSE	0	-0.152879	0.102927	-0.255412
YIR039C	YPS6	FALSE	0	-0.0446617	0.193436	-0.254996
YGR251W	NOP19	TRUE	0	-0.066441	0.113753	-0.254934
YGL080W	MPC1	FALSE	0	-0.104664	-0.169499	-0.253767
YLR126C	YLR126C	FALSE	0	-0.0671636	-0.193237	-0.253737
YLR120W-A	YLR120W-A	FALSE	0	-0.2673	-0.0721797	-0.253425
YMR035W	IMP2	FALSE	0	-0.0331166	-0.0945903	-0.253399
YAR047C	YAR047C	FALSE	0	-0.143276	-0.0918808	-0.252851
YGL247W	BRR6	TRUE	0	-0.2176	-0.0416528	-0.251723
YGL187C	COX4	FALSE	0	-0.170716	0.315334	-0.251514
YDL203C	ACK1	FALSE	0	0.21913	-0.379859	-0.251471
YMR240C	CUS1	TRUE	0	0.270499	0.295693	-0.251292
YLR084C	RAX2	FALSE	0	-0.0246895	-0.134401	-0.250796
YPR074W-A	YPR074W-A	FALSE	0	-0.102589	-0.1601	-0.250672
YJL029C	VPS53	FALSE	0	-0.0482663	-0.102336	-0.250332
YOR349W	CIN1	FALSE	0	0.290639	0.359274	-0.249859
YDR237W	MRPL7	FALSE	0	-0.0886795	-0.170392	-0.249371
YJL010C	NOP9	TRUE	0	0.093712	-0.016002	-0.249105
YOR134W	BAG7	FALSE	0	0.131822	0.145476	-0.247591
YJR111C	PXP2	FALSE	0	-0.197299	0.0558918	-0.247363
YJL210W	PEX2	FALSE	0	-0.0661548	-0.0957406	-0.247145
YGR038W	ORM1	FALSE	0	0.222349	-0.255404	-0.245888
YDR152W	GIR2	FALSE	0	0.19604	0.168875	-0.245197
YOR292C	YOR292C	FALSE	0	0.0659414	-0.431195	-0.245142
YCL055W	KAR4	FALSE	0	0.149729	0.0571643	-0.245068
YGR232W	NAS6	FALSE	0	0.0674927	-0.0972647	-0.244373
YPR036W	VMA13	FALSE	0	0.155789	0.00706045	-0.244193
YDR416W	SYF1	TRUE	0	-0.220098	-0.185238	-0.244138
YMR148W	OSW5	FALSE	0	-0.132636	-0.319796	-0.244053
YFR010W	UBP6	FALSE	0	-0.0383357	-0.291858	-0.243493
YGR070W	ROM1	FALSE	0	-0.0774799	-0.099182	-0.242805
YPL253C	VIK1	FALSE	0	0.281397	0.267844	-0.242783
YIL131C	FKH1	FALSE	0	0.18009	-0.452441	-0.242652
YOR293W	RPS10A	FALSE	0	-0.135999	0.0233124	-0.242503
YDR233C	RTN1	FALSE	0	0.249439	-0.228524	-0.242422
YPL094C	SEC62	TRUE	0	0.243378	0.141579	-0.242287
YGR111W	YGR111W	FALSE	0	-0.0883518	-0.153896	-0.241735
YOL028C	YAP7	FALSE	0	-0.3849	-0.316874	-0.240962
YMR025W	CSI1	FALSE	0	0.0114511	-0.0336466	-0.240895
YKL009W	MRT4	FALSE	0	-0.204017	0.227217	-0.240681
YKR096W	ESL2	FALSE	0	0.421002	0.379233	-0.240074
YDL233W	MFG1	FALSE	0	-0.171088	-0.426834	-0.238614
YGR169C	PUS6	FALSE	0	-0.24066	0.263006	-0.238532
YOL154W	ZPS1	FALSE	0	-0.327031	-0.24795	-0.237831
YHR116W	COX23	FALSE	0	0.0202909	0.137185	-0.237261
YBL034C	STU1	TRUE	0	-0.141907	-0.382996	-0.235948
YOR245C	DGA1	FALSE	0	-0.194324	0.264019	-0.235945
YBR045C	GIP1	FALSE	0	-0.547285	-0.379867	-0.235803
YCR052W	RSC6	TRUE	0	0.214946	-0.492059	-0.235785
YFL042C	LAM5	FALSE	0	-0.345125	-0.162002	-0.235248
YGL157W	ARI1	FALSE	0	0.0950802	-0.142661	-0.234403
YNL244C	SUI1	TRUE	0	-0.338575	-0.26097	-0.234285
YGR230W	BNS1	FALSE	0	0.0886539	-0.0861994	-0.233242
YGR026W	YGR026W	FALSE	0	-0.204951	-0.012168	-0.233019
YNL252C	MRPL17	FALSE	0	-0.239921	0.408729	-0.232932
YER061C	CEM1	FALSE	0	0.131537	0.250303	-0.232653
YGL258W-A	YGL258W-A	FALSE	0	0.00710502	-0.10092	-0.231303
YPL088W	YPL088W	FALSE	0	-0.261791	-0.590666	-0.231192
YAL015C	NTG1	FALSE	0	-0.18407	0.0402658	-0.231165
YLL043W	FPS1	FALSE	0	0.242942	0.225482	-0.230967
YFR049W	YMR31	FALSE	0	0.0731426	-0.18287	-0.230157
YER027C	GAL83	FALSE	0	0.395834	0.43682	-0.229589
YIL155C	GUT2	FALSE	0	0.143175	0.352145	-0.229237
YDR182W-A	YDR182W-A	FALSE	0	0.100606	-0.051448	-0.229069
YOR073W	SGO1	FALSE	0	-0.188171	-0.275738	-0.22885
YBL057C	PTH2	FALSE	0	0.106787	0.35162	-0.228649
YAL063C	FLO9	FALSE	0	0.295643	-0.0276713	-0.228272
YMR068W	AVO2	FALSE	0	0.276086	-0.312461	-0.227306
YNL206C	RTT106	FALSE	0	-0.155456	0.00663643	-0.226891
YPR139C	LOA1	FALSE	0	-0.119998	-0.362885	-0.226294
YNR072W	HXT17	FALSE	0	-0.135695	-0.0775653	-0.225799
YGR107W	YGR107W	FALSE	0	-0.0851025	-0.0433862	-0.225275
YDR184C	ATC1	FALSE	0	-0.00156227	-0.280454	-0.22525
YGL118C	YGL118C	FALSE	0	0.0411135	-0.0752445	-0.225176
YPL096W	PNG1	FALSE	0	-0.135008	-0.161466	-0.224965
YJL180C	ATP12	FALSE	0	-0.238962	0.185049	-0.224301
YJL004C	SYS1	FALSE	0	-0.148712	-0.161526	-0.223989
YJL100W	LSB6	FALSE	0	0.0972917	-0.178887	-0.223841
YPR065W	ROX1	FALSE	0	0.229466	-0.255952	-0.223702
YER002W	NOP16	FALSE	0	-0.24279	-0.285048	-0.223629
YCL056C	PEX34	FALSE	0	-0.0897719	-0.100123	-0.222115
YJL200C	ACO2	FALSE	0	-0.456501	-0.326529	-0.221981
YPL130W	SPO19	FALSE	0	0.0274177	-0.206222	-0.221001
YOL163W	YOL163W	FALSE	0	0.136258	0.0362658	-0.220542
YPL222W	FMP40	FALSE	0	-0.269316	-0.349646	-0.220323
YIL127C	RRT14	FALSE	0	-0.164877	0.260873	-0.220212
YKL007W	CAP1	FALSE	0	-0.25609	-0.0653907	-0.219443
YDL175C	AIR2	FALSE	0	0.0269341	-0.120223	-0.218423
YBL098W	BNA4	FALSE	0	0.252771	0.120684	-0.21767
YOL110W	SHR5	FALSE	0	0.0201888	-0.174052	-0.217599
YCR012W	PGK1	TRUE	0	0.152258	0.00159158	-0.217536
YIR025W	MND2	FALSE	0	-0.300186	0.129783	-0.217223
YIL026C	IRR1	TRUE	0	-0.105863	0.0209711	-0.217057
YDL217C	TIM22	TRUE	0	-0.13678	0.105211	-0.21698
YNR007C	ATG3	FALSE	0	-0.231624	-0.135821	-0.216775
YKR077W	MSA2	FALSE	0	-0.0278964	-0.136654	-0.216622
YGR159C	NSR1	FALSE	0	0.0743554	0.127715	-0.216571
YKR011C	YKR011C	FALSE	0	-0.0139902	-0.401962	-0.216245
YDL154W	MSH5	FALSE	0	-0.0726802	0.370066	-0.216053
YCR085W	YCR085W	FALSE	0	-0.0867021	-0.0936588	-0.216038
YPL005W	AEP3	FALSE	0	0.112511	-0.161356	-0.215666
YER096W	SHC1	FALSE	0	0.160105	-0.222183	-0.215267
YOR187W	TUF1	FALSE	0	-0.223598	-0.207581	-0.213708
YNL197C	WHI3	FALSE	0	0.0703222	0.179192	-0.212406
YNL316C	PHA2	FALSE	0	-0.0894247	-0.244818	-0.211738
YKR080W	MTD1	FALSE	0	0.235742	-0.0558215	-0.211735
YMR031C	EIS1	FALSE	0	-0.118544	0.113091	-0.211497
YIR028W	DAL4	FALSE	0	0.144818	0.149953	-0.211145
YCL029C	BIK1	FALSE	0	0.142263	0.331619	-0.211141
YLR034C	SMF3	FALSE	0	-0.317705	-0.0613032	-0.210925
YMR177W	MMT1	FALSE	0	-0.136451	-0.0594945	-0.208904
YOR185C	GSP2	FALSE	0	-0.216787	0.0863889	-0.20872
YLR183C	TOS4	FALSE	0	0.263505	-0.183449	-0.208671
YJR059W	PTK2	FALSE	0	-0.167401	-0.166811	-0.20838
YDL063C	SYO1	FALSE	0	0.627896	0.605904	-0.207945
YOR378W	AMF1	FALSE	0	0.111861	0.213493	-0.207696
YKR007W	MEH1	FALSE	0	-0.101044	0.642071	-0.207118
YNL230C	ELA1	FALSE	0	0.0636396	-0.128866	-0.206575
YML079W	YML079W	FALSE	0	0.196638	-0.301081	-0.20639
YDL162C	YDL162C	FALSE	0	-0.205832	-0.447986	-0.205991
YNL164C	IBD2	FALSE	0	-0.264286	0.260943	-0.205945
YKR004C	ECM9	TRUE	0	-0.139269	0.114524	-0.205463
YDR073W	SNF11	FALSE	0	0.139179	0.0570178	-0.204763
YGR246C	BRF1	TRUE	0	-0.48879	-0.467307	-0.204269
YLR112W	YLR112W	FALSE	0	-0.295123	-0.281097	-0.203947
YBR289W	SNF5	FALSE	0	0.0769013	-0.0874798	-0.203902
YNR050C	LYS9	FALSE	0	0.0814298	0.180749	-0.203643
YDL107W	MSS2	FALSE	0	0.0835022	-0.136712	-0.203259
YKR069W	MET1	FALSE	0	0.258862	0.22329	-0.202709
YDL218W	YDL218W	FALSE	0	-0.28088	-0.0159771	-0.202548
YPR054W	SMK1	FALSE	0	-0.525602	0.30939	-0.202411
YBL059W	YBL059W	FALSE	0	-0.209231	-0.248784	-0.202319
YGR268C	HUA1	FALSE	0	-0.333165	-0.216494	-0.201561
YLR439W	MRPL4	FALSE	0	0.0785716	-0.240919	-0.200421
YMR305C	SCW10	FALSE	0	-0.14088	-0.216336	-0.198776
YMR082C	YMR082C	FALSE	0	-0.0551724	-0.213498	-0.196567
YJL103C	GSM1	FALSE	0	-0.216295	-0.385184	-0.195308
YER048C	CAJ1	FALSE	0	-0.0576049	-0.392238	-0.195199
YMR067C	UBX4	FALSE	0	-0.331896	0.0200879	-0.195125
YGL212W	VAM7	FALSE	0	0.13895	0.133496	-0.194626
YML098W	TAF13	TRUE	0	0.123152	-0.0368521	-0.193705
YDR189W	SLY1	TRUE	0	0.135525	-0.287667	-0.192718
YDR223W	CRF1	FALSE	0	-0.0807302	0.0274163	-0.192414
YER174C	GRX4	FALSE	0	-0.347613	-0.126788	-0.1919
YGL221C	NIF3	FALSE	0	0.172355	0.0999196	-0.191853
YOR021C	SFM1	FALSE	0	0.328075	0.101985	-0.191485
YHR060W	VMA22	FALSE	0	0.0562126	0.138133	-0.191478
YDL018C	ERP3	FALSE	0	-0.357172	-0.310611	-0.191055
YKL042W	SPC42	TRUE	0	-0.116548	0.0804803	-0.190851
YDR380W	ARO10	FALSE	0	0.155161	0.345473	-0.190829
YLR186W	EMG1	TRUE	0	-0.0479947	-0.271897	-0.189906
YNL114C	YNL114C	TRUE	0	-0.17845	-0.202251	-0.189042
YML029W	USA1	FALSE	0	-0.0903516	-0.234883	-0.188546
YBR195C	MSI1	FALSE	0	0.0532985	-0.176721	-0.188366
YLR296W	YLR296W	FALSE	0	-0.259791	-0.520274	-0.188233
YDL098C	SNU23	TRUE	0	0.125127	-0.0923002	-0.187919
YDR239C	YDR239C	FALSE	0	-0.197365	0.200489	-0.187351
YER084W	YER084W	FALSE	0	0.212565	-0.132939	-0.187243
YOR028C	CIN5	FALSE	0	-0.0528983	-0.39766	-0.186968
YOR288C	MPD1	FALSE	0	-0.0606674	0.0526754	-0.186366
YFR011C	MIC19	FALSE	0	0.0952483	-0.00915307	-0.186275
YNL093W	YPT53	FALSE	0	-0.158399	-0.199836	-0.186061
YCL042W	YCL042W	FALSE	0	-0.418349	0.252618	-0.185991
YHL016C	DUR3	FALSE	0	-0.316979	-0.441617	-0.185055
YLR094C	GIS3	FALSE	0	-0.0170741	-0.0530112	-0.184555
YGR158C	MTR3	TRUE	0	0.452108	0.0889372	-0.183808
YAL033W	POP5	TRUE	0	-0.115409	-0.210855	-0.183346
YGR036C	CAX4	FALSE	0	0.123605	0.0663065	-0.183014
YJR076C	CDC11	TRUE	0	0.353428	0.170198	-0.182896
YDR510W	SMT3	TRUE	0	-0.0364067	0.125519	-0.182564
YBR184W	YBR184W	FALSE	0	-0.112506	-0.125536	-0.1823
YBR213W	MET8	FALSE	0	0.0553349	-0.0417049	-0.182197
YNL082W	PMS1	FALSE	0	-0.0717011	0.208135	-0.181775
YMR124W	EPO1	FALSE	0	0.40968	0.160078	-0.179241
YMR036C	MIH1	FALSE	0	-0.152445	-0.331402	-0.178671
YOR278W	HEM4	TRUE	0	0.20679	0.0563062	-0.178329
YGR241C	YAP1802	FALSE	0	0.0994477	0.23013	-0.178289
YMR103C	YMR103C	FALSE	0	0.222964	0.036122	-0.177655
YAL011W	SWC3	FALSE	0	-0.15208	0.161677	-0.177373
YBR153W	RIB7	TRUE	0	-0.169833	0.109959	-0.17702
YMR048W	CSM3	FALSE	0	-0.278953	-0.255411	-0.176452
YHR076W	PTC7	FALSE	0	0.0906473	-0.066896	-0.176425
YMR004W	MVP1	FALSE	0	0.0287349	0.280688	-0.176325
YHR077C	NMD2	FALSE	0	-0.0429046	0.119563	-0.175856
YMR194C-B	CMC4	FALSE	0	-0.420251	0.155511	-0.175424
YPL087W	YDC1	FALSE	0	-0.133698	-0.0721748	-0.175131
YJR025C	BNA1	FALSE	0	-0.146919	-0.182742	-0.174991
YBR053C	YBR053C	FALSE	0	0.150541	0.256636	-0.174368
YGL149W	YGL149W	FALSE	0	-0.005062	-0.10822	-0.174115
YER097W	YER097W	FALSE	0	-0.0290282	0.00462319	-0.174111
YMR174C	PAI3	FALSE	0	0.0512588	0.120164	-0.174068
YER080W	AIM9	FALSE	0	0.456946	-0.193892	-0.174019
YEL026W	SNU13	TRUE	0	-0.249435	-0.391183	-0.173465
YKL128C	PMU1	FALSE	0	0.100208	0.195678	-0.173378
YBR222C	PCS60	FALSE	0	0.342183	0.131944	-0.1728
YPR108W	RPN7	TRUE	0	-0.287328	0.247136	-0.172699
YCR009C	RVS161	FALSE	0	-0.38151	0.507272	-0.172577
YHL046C	PAU13	FALSE	0	-0.121595	-0.187719	-0.172167
YDR452W	PPN1	FALSE	0	-0.176213	-0.17097	-0.171452
YPR134W	MSS18	FALSE	0	0.148305	-0.0619499	-0.171056
YJL213W	YJL213W	FALSE	0	-0.120981	0.250266	-0.170972
YOL031C	SIL1	FALSE	0	0.257455	-0.495773	-0.170359
YBR233W	PBP2	FALSE	0	0.205729	0.162542	-0.170329
YOL122C	SMF1	FALSE	0	0.00719355	-0.156216	-0.170315
YGL208W	SIP2	FALSE	0	-0.0769255	0.0637542	-0.170099
YNL067W-A	YNL067W-A	FALSE	0	-0.100985	0.0165941	-0.169934
YML123C	PHO84	FALSE	0	-0.069348	-0.198172	-0.169931
YML012W	ERV25	FALSE	0	-0.188949	-0.108109	-0.16974
YNL160W	YGP1	FALSE	0	-0.183215	-0.280646	-0.169033
YML066C	SMA2	FALSE	0	-0.0550527	0.189469	-0.168627
YBR244W	GPX2	FALSE	0	-0.0966678	-0.19749	-0.168516
YBR158W	AMN1	FALSE	0	-0.353835	-0.427691	-0.168424
YCR004C	YCP4	FALSE	0	0.112064	0.187169	-0.16817
YPL150W	YPL150W	FALSE	0	-0.126239	0.276277	-0.167191
YPL021W	ECM23	FALSE	0	0.111901	-0.125673	-0.166787
YCR022C	YCR022C	FALSE	0	-0.182714	-0.158261	-0.16623
YIL096C	BMT5	FALSE	0	0.24283	0.194183	-0.165753
YGL065C	ALG2	TRUE	0	-0.198908	-0.409967	-0.165656
YBR176W	ECM31	FALSE	0	-0.0180569	-0.307793	-0.165603
YDL091C	UBX3	FALSE	0	0.0256439	0.00680671	-0.16547
YLL061W	MMP1	FALSE	0	0.181464	0.134877	-0.163993
YMR040W	YET2	FALSE	0	-0.0630891	-0.242015	-0.163462
YDR408C	ADE8	FALSE	0	0.386613	0.128119	-0.161918
YJL193W	YJL193W	FALSE	0	0.120786	-0.0769419	-0.161237
YLR088W	GAA1	TRUE	0	-0.136614	-0.232347	-0.160934
YKR032W	YKR032W	FALSE	0	0.0264422	0.0787021	-0.16067
YAL018C	LDS1	FALSE	0	0.157613	-0.000658223	-0.160598
YOL083W	ATG34	FALSE	0	-0.0733744	-0.0930484	-0.159884
YOR158W	PET123	FALSE	0	-0.123104	-0.143171	-0.159435
YDR489W	SLD5	TRUE	0	-0.106024	0.200967	-0.158978
YJR001W	AVT1	FALSE	0	0.242544	0.395038	-0.158631
YLR053C	YLR053C	FALSE	0	-0.00902393	-0.12966	-0.156854
YHR208W	BAT1	FALSE	0	-0.220802	0.0846279	-0.156306
YPL096C-A	ERI1	FALSE	0	0.0548764	-0.091891	-0.156159
YHR033W	YHR033W	FALSE	0	0.216413	-0.144909	-0.155859
YGR068C	ART5	FALSE	0	-0.190503	-0.156514	-0.155777
YGR255C	COQ6	FALSE	0	0.11127	0.254321	-0.155758
YDR355C	YDR355C	TRUE	0	0.223625	-0.256389	-0.155245
YDR379W	RGA2	FALSE	0	-0.221166	-0.101088	-0.154516
YPR103W	PRE2	TRUE	0	-0.499484	-0.372874	-0.153409
YGL194C	HOS2	FALSE	0	-0.205424	-0.194354	-0.153293
YNL005C	MRP7	FALSE	0	-0.278902	-0.263596	-0.153253
YBR201W	DER1	FALSE	0	0.0831025	-0.318118	-0.152973
YJR099W	YUH1	FALSE	0	0.146673	-0.073701	-0.151585
YBL049W	MOH1	FALSE	0	-0.299482	-0.291476	-0.151015
YGR085C	RPL11B	FALSE	0	-0.252186	-0.233149	-0.150905
YNL302C	RPS19B	FALSE	0	-0.0324153	-0.19765	-0.149881
YMR264W	CUE1	FALSE	0	-0.0797605	-0.12823	-0.14987
YPR064W	YPR064W	FALSE	0	-0.0565053	-0.102211	-0.148363
YKR091W	SRL3	FALSE	0	0.195677	-0.00198095	-0.148301
YBR150C	TBS1	FALSE	0	-0.1359	-0.117207	-0.14796
YDL139C	SCM3	TRUE	0	0.0917228	0.185892	-0.14784
YGR240C-A	YGR240C-A	FALSE	0	-0.108091	-0.10919	-0.147647
YOR355W	GDS1	FALSE	0	0.18535	0.0539583	-0.147075
YNL198C	YNL198C	FALSE	0	-0.0891921	-0.366165	-0.146887
YGR161C	RTS3	FALSE	0	0.101074	-0.0194219	-0.1467
YML106W	URA5	FALSE	0	0.0629509	-0.570437	-0.146394
YBR076C-A	YBR076C-A	FALSE	0	0.117759	-0.121569	-0.14593
YGL025C	PGD1	FALSE	0	-0.310261	0.0872037	-0.145915
YGR288W	MAL13	FALSE	0	-0.105497	0.0910302	-0.145848
YPR015C	YPR015C	FALSE	0	0.22202	0.162714	-0.145196
YGR295C	COS6	FALSE	0	-0.117285	-0.0872385	-0.144085
YPL205C	YPL205C	FALSE	0	-0.258774	-0.248167	-0.143306
YNL001W	DOM34	FALSE	0	0.403397	0.115951	-0.143087
YOR363C	PIP2	FALSE	0	-0.154374	-0.215372	-0.142863
YAR031W	PRM9	FALSE	0	0.308263	0.0911563	-0.142561
YHR058C	MED6	TRUE	0	0.177532	-0.518229	-0.142315
YDR013W	PSF1	TRUE	0	-0.120391	-0.275788	-0.141978
YPL015C	HST2	FALSE	0	-0.378061	-0.130264	-0.141625
YER046W	SPO73	FALSE	0	-0.0341787	-0.233251	-0.140999
YDR197W	CBS2	FALSE	0	0.0457552	-0.206257	-0.14092
YLL018C-A	COX19	FALSE	0	-0.118798	-0.141223	-0.140628
YGL248W	PDE1	FALSE	0	0.188013	-0.140757	-0.14006
YNL272C	SEC2	TRUE	0	0.264454	0.126709	-0.139723
YOR231W	MKK1	FALSE	0	0.0936274	-0.142782	-0.139674
YOR126C	IAH1	FALSE	0	0.254398	0.0983716	-0.139575
YPL030W	TRM44	FALSE	0	-0.081577	-0.00642755	-0.138795
YLR214W	FRE1	FALSE	0	0.325932	-0.0448799	-0.137906
YCL026C-A	FRM2	FALSE	0	-0.131864	-0.111742	-0.137666
YDR113C	PDS1	TRUE	0	-0.136104	-0.240463	-0.137247
YBR057C	MUM2	FALSE	0	-0.0646327	-0.22634	-0.137243
YGL138C	YGL138C	FALSE	0	0.401843	0.278375	-0.137122
YJR124C	YJR124C	FALSE	0	0.178913	0.0978553	-0.136329
YJL202C	YJL202C	TRUE	0	0.0725287	-0.0451468	-0.13556
YPL189W	GUP2	FALSE	0	-0.409935	-0.377966	-0.133812
YML046W	PRP39	TRUE	0	-0.0604681	0.0792516	-0.132996
YPL178W	CBC2	FALSE	0	-0.143363	-0.024149	-0.132721
YJL137C	GLG2	FALSE	0	0.0948126	-0.157236	-0.132471
YFL014W	HSP12	FALSE	0	0.225586	-0.0985999	-0.132116
YLR424W	SPP382	TRUE	0	-0.603403	-0.34542	-0.13153
YNR012W	URK1	FALSE	0	0.155236	0.103805	-0.13031
YLR199C	PBA1	FALSE	0	-0.0701607	-0.0205264	-0.13003
YKL193C	SDS22	TRUE	0	0.219286	0.170046	-0.129946
YPR097W	YPR097W	FALSE	0	-0.0341654	-0.1682	-0.128296
YOR350C	MNE1	FALSE	0	0.156195	-0.113799	-0.128131
YML071C	COG8	FALSE	0	-0.0526808	-0.205366	-0.127007
YFR023W	PES4	FALSE	0	-0.0248288	-0.166134	-0.125984
YLR283W	YLR283W	FALSE	0	-0.0900131	0.00368641	-0.125887
YHR179W	OYE2	FALSE	0	-0.00469255	-0.0144282	-0.124239
YBL091C	MAP2	FALSE	0	0.145169	0.201356	-0.123238
YBR086C	IST2	FALSE	0	0.0125073	-0.201562	-0.123101
YBR013C	YBR013C	FALSE	0	-0.100341	-0.0518403	-0.122719
YFR032C-B	YFR032C-B	FALSE	0	0.138508	-0.00169701	-0.122071
YLR130C	ZRT2	FALSE	0	0.137968	-0.149044	-0.121619
YBL101C	ECM21	FALSE	0	-0.0161707	0.00812521	-0.121568
YER060W-A	FCY22	FALSE	0	0.162097	-0.0220824	-0.121464
YPL170W	DAP1	FALSE	0	0.0935647	0.120284	-0.120285
YOR367W	SCP1	FALSE	0	0.241682	-0.117053	-0.120206
YPL108W	YPL108W	FALSE	0	0.192713	-0.320069	-0.12017
YPL133C	RDS2	FALSE	0	0.186411	0.108551	-0.120074
YIR034C	LYS1	FALSE	0	0.0572828	-0.206823	-0.119842
YML084W	YML084W	FALSE	0	-0.0539081	0.131956	-0.119153
YFL050C	ALR2	FALSE	0	0.341002	0.371523	-0.118641
[truncated: 2,593 more rows]
